# Supplementary material for: Genome-scale CRISPR screening for modifiers of cellular LDL uptake
Source: bioRxiv preprint, doi:10.1101/2020.07.01.182246, version 1 (2020-07-01)
Supplement: Supplemental Table 2 [file 182246_file15.xlsx]

## Sheet: annotation
Secondary validation screen of LDL uptake in HuH7 cells cultured under lipoprotein-rich or lipoprotein-depleted conditions
Output files from MAGeCK analysis
control = LDLlow sorted cells
treatment = LDLhigh sorted cells
Gene-level analysis
id	gene ID
num	number of individual gRNAs detected for a given gene
neg|score	MAGeCK significance score for depletion in LDLhigh cells (low score indicates gene disruption reduces LDL uptake)
neg|p-value	p-value for depletion in LDLhigh cells (gene disruption reduces LDL uptake)
neg|fdr	FDR for depletion in LDLhigh cells (gene disruption reduces LDL uptake)
neg|rank	gene rank for depletion in LDLhigh cells (gene disruption reduces LDL uptake)
neg|goodsgrna	number of gene-targeting gRNA with significant depletion in LDLhigh cells (gene disruption reduces LDL uptake)
neg|lfc	composite log2 fold change of gene-targeting gRNA (negative value indicates gene disruption reduces LDL uptake)
pos|score	MAGeCK significance score for enrichment in LDLhigh cells (low score indicates gene disruption increases LDL uptake)
pos|p-value	p-value for enrichment in LDLhigh cells (gene disruption increases LDL uptake)
pos|fdr	FDR for enrichment in LDLhigh cells (gene disruption increases LDL uptake)
pos|rank	gene rank for enrichment in LDLhigh cells (gene disruption increases LDL uptake)
pos|goodsgrna	number of gene-targeting gRNA with significant enrichment in LDLhigh cells (gene disruption increases LDL uptake)
pos|lfc	composite log2 fold change of gene-targeting gRNA (positive value indicates gene disruption increases LDL uptake)
gRNA-level analysis
sgrna	GeCKO library gRNA identifier
gene	targeted gene
control_count	individual replicate normalized read counts in LDLlow cells
treatment_count	individual replicate normalized read counts in LDLhigh cells
control_mean	mean normalized read counts in LDLlow cells
treat_mean	mean normalized read counts in LDLhigh cells
LFC	log2 fold change of normalized read counts in LDLhigh relative to LDLlow cells
control_var	raw variance in LDLlow cells
adj_var	adjusted variance in LDLlow cells
score	MAGeCK significance score for individual gRNA
p.low	p-value for depletion in LDLhigh cells (gene disruption reduces LDL uptake)
p.high	p-value for enrichment in LDLhigh cells (gene disruption increases LDL uptake)
p.twosided	minimum p-value for either enrichment or depletion
FDR	FDR for p.twosided
high_in_treatment	whether normalized read counts for gRNA are higher in LDLhigh than LDLlow cells (gene disruption increases LDL uptake)

## Sheet: LP-rich_gene
id	num	neg|score	neg|p-value	neg|fdr	neg|rank	neg|goodsgrna	neg|lfc	pos|score	pos|p-value	pos|fdr	pos|rank	pos|goodsgrna	pos|lfc
LDLR	15	4.6722e-35	2.8256e-06	0.000165	1	15	-3.9557	1	1	0.999997	1752	0	-3.9557
SCARB1	15	5.3168e-14	2.8256e-06	0.000165	2	15	-1.5563	1	1	0.999997	1751	0	-1.5563
HNF4A	15	8.0757e-14	2.8256e-06	0.000165	3	14	-1.9826	0.99821	0.99824	0.999997	1691	1	-1.9826
SCAP	15	1.2849e-13	2.8256e-06	0.000165	4	14	-1.6112	0.9953	0.99725	0.999997	1680	1	-1.6112
CDIPT	15	2.6886e-13	2.8256e-06	0.000165	5	13	-1.8977	0.99805	0.99816	0.999997	1688	1	-1.8977
STK11	15	3.418e-12	2.8256e-06	0.000165	6	13	-1.5602	0.99999	1	0.999997	1739	0	-1.5602
CCDC115	15	1.4432e-11	2.8256e-06	0.000165	7	15	-1.6428	1	1	0.999997	1750	0	-1.6428
TAF2	15	1.8518e-11	2.8256e-06	0.000165	8	14	-1.7118	1	1	0.999997	1745	0	-1.7118
CHD7	15	7.0635e-11	2.8256e-06	0.000165	9	15	-1.5627	1	1	0.999997	1748	0	-1.5627
GDI2	15	6.3461e-10	2.8256e-06	0.000165	10	14	-1.9549	0.99981	0.99986	0.999997	1717	0	-1.9549
MBTPS1	15	7.6959e-10	2.8256e-06	0.000165	11	13	-1.9598	0.96606	0.99006	0.999997	1642	1	-1.9598
HNRNPU	15	1.3506e-09	2.8256e-06	0.000165	12	15	-1.3765	1	1	0.999997	1749	0	-1.3765
CCDC22	15	2.5936e-09	2.8256e-06	0.000165	13	14	-1.3935	0.99928	0.99916	0.999997	1699	0	-1.3935
AP2M1	15	2.6124e-09	2.8256e-06	0.000165	14	11	-1.5217	0.87636	0.96781	0.999997	1587	1	-1.5217
ATP11A	15	3.1605e-09	2.8256e-06	0.000165	15	12	-1.4011	0.90383	0.97397	0.999997	1602	2	-1.4011
CSNK1A1	15	3.8061e-09	2.8256e-06	0.000165	16	11	-1.6683	0.99349	0.99699	0.999997	1677	1	-1.6683
AXIN1	15	6.3842e-09	2.8256e-06	0.000165	17	15	-1.0918	1	1	0.999997	1747	0	-1.0918
DCPS	15	1.5265e-08	2.8256e-06	0.000165	18	13	-1.406	0.10349	0.32952	0.727123	415	2	-1.406
STX4	15	2.4168e-08	2.8256e-06	0.000165	19	12	-1.1292	0.99997	0.99997	0.999997	1733	0	-1.1292
SETDB1	15	2.5862e-08	2.8256e-06	0.000165	20	13	-1.574	0.99996	0.99997	0.999997	1732	0	-1.574
INTS1	15	3.5633e-08	2.8256e-06	0.000165	21	13	-1.4011	1	1	0.999997	1741	0	-1.4011
MPDU1	15	3.8031e-08	2.8256e-06	0.000165	22	13	-1.1812	0.99987	0.99991	0.999997	1724	0	-1.1812
ELOF1	15	4.1099e-08	2.8256e-06	0.000165	23	11	-1.3548	0.99994	0.99995	0.999997	1729	0	-1.3548
FNDC3B	15	4.5016e-08	2.8256e-06	0.000165	24	14	-1.5118	1	1	0.999997	1746	0	-1.5118
TAF8	15	5.0462e-08	2.8256e-06	0.000165	25	13	-1.9721	0.9988	0.99867	0.999997	1696	1	-1.9721
GAPDH	15	1.1371e-07	2.8256e-06	0.000165	26	14	-1.4823	1	1	0.999997	1744	0	-1.4823
PIK3C3	15	1.4792e-07	2.8256e-06	0.000165	27	12	-1.6743	0.9998	0.99984	0.999997	1715	0	-1.6743
hsa-mir-6886	13	1.7765e-07	2.8256e-06	0.000165	28	10	-1.0214	0.99983	0.99982	0.999997	1719	0	-1.0214
C16orf62	15	2.1832e-07	2.8256e-06	0.000165	29	10	-1.119	0.4914	0.7939	0.990025	1201	3	-1.119
EXOC8	15	3.2606e-07	2.8256e-06	0.000165	30	13	-1.0419	1	1	0.999997	1740	0	-1.0419
SUMO2	15	8.1476e-07	8.4769e-06	0.000437	31	13	-1.2034	0.69793	0.90628	0.999997	1448	1	-1.2034
DHRSX	15	8.1503e-07	8.4769e-06	0.000437	32	13	-1.3718	0.91087	0.97586	0.999997	1605	2	-1.3718
KMT2D	15	8.9272e-07	8.4769e-06	0.000437	33	12	-1.1461	0.99999	0.99999	0.999997	1737	0	-1.1461
GNB2L1	15	1.0271e-06	8.4769e-06	0.000437	34	14	-0.94762	1	1	0.999997	1742	0	-0.94762
WDR7	15	1.0478e-06	1.4128e-05	0.000589	35	13	-1.2365	0.96949	0.99075	0.999997	1646	1	-1.2365
TAF10	15	1.1644e-06	1.4128e-05	0.000589	36	11	-1.1353	0.94086	0.98389	0.999997	1625	2	-1.1353
GAGE12B	15	1.1682e-06	1.4128e-05	0.000589	37	12	-1.5697	0.99977	0.99983	0.999997	1712	0	-1.5697
KDM6A	15	1.2745e-06	1.4128e-05	0.000589	38	13	-0.96576	0.99999	1	0.999997	1738	0	-0.96576
MBTPS2	15	1.4141e-06	1.4128e-05	0.000589	39	10	-0.86274	0.91222	0.97617	0.999997	1606	2	-0.86274
GET4	15	1.7172e-06	1.4128e-05	0.000589	40	11	-0.92654	0.87964	0.96847	0.999997	1589	2	-0.92654
CTNNBIP1	15	1.8381e-06	1.4128e-05	0.000589	41	11	-0.85133	0.97706	0.99239	0.999997	1658	2	-0.85133
STT3A	15	1.929e-06	1.4128e-05	0.000589	42	11	-1.4054	0.883	0.96919	0.999997	1592	2	-1.4054
EXOC1	15	2.3179e-06	1.9779e-05	0.00077	43	14	-0.9933	1	1	0.999997	1743	0	-0.9933
MSTO1	15	2.8538e-06	1.9779e-05	0.00077	44	10	-1.2225	0.98922	0.99602	0.999997	1671	2	-1.2225
GAGE1	14	3.134e-06	1.9779e-05	0.00077	45	12	-1.3727	0.99953	0.99948	0.999997	1707	0	-1.3727
GTF2A2	15	5.3697e-06	4.8036e-05	0.00183	46	9	-1.4882	0.38857	0.70877	0.936584	1022	5	-1.4882
MED26	15	6.2704e-06	5.9338e-05	0.002166	47	12	-0.88851	0.99957	0.9996	0.999997	1708	0	-0.88851
LAS1L	15	6.5269e-06	5.9338e-05	0.002166	48	12	-1.3939	0.99989	0.99992	0.999997	1725	0	-1.3939
SETD1A	15	7.2255e-06	6.4989e-05	0.002233	49	11	-0.80471	0.99976	0.99982	0.999997	1711	0	-0.80471
EXOC2	15	7.2897e-06	6.4989e-05	0.002233	50	9	-0.67481	0.88313	0.96921	0.999997	1593	3	-0.67481
PRMT1	15	7.3478e-06	6.4989e-05	0.002233	51	12	-1.1235	0.97938	0.99298	0.999997	1664	1	-1.1235
CEBPA	15	8.5163e-06	7.0641e-05	0.00225	52	12	-0.87122	0.99896	0.9988	0.999997	1697	1	-0.87122
UVRAG	15	8.6752e-06	7.0641e-05	0.00225	53	11	-1.09	0.62428	0.86827	0.999997	1362	3	-1.09
DPAGT1	15	8.8869e-06	7.0641e-05	0.00225	54	13	-1.4543	0.93314	0.98173	0.999997	1615	1	-1.4543
PFDN2	15	8.979e-06	7.0641e-05	0.00225	55	13	-1.2402	0.99822	0.99825	0.999997	1692	1	-1.2402
GPN2	15	1.1309e-05	9.3246e-05	0.002917	56	13	-1.0197	0.99996	0.99997	0.999997	1731	0	-1.0197
SRCAP	15	1.1674e-05	9.8897e-05	0.002987	57	11	-0.83668	0.59251	0.85124	0.999997	1325	1	-0.83668
MTA2	15	1.1727e-05	9.8897e-05	0.002987	58	12	-0.97886	0.86659	0.96555	0.999997	1581	3	-0.97886
PIAS1	15	1.2427e-05	0.0001102	0.003272	59	13	-0.92114	0.61074	0.86121	0.999997	1346	1	-0.92114
UBA2	15	1.4573e-05	0.00012715	0.003713	60	12	-1.1361	0.97568	0.99207	0.999997	1656	1	-1.1361
NCOR1	15	1.5164e-05	0.0001328	0.003814	61	13	-0.69584	0.97526	0.99198	0.999997	1655	1	-0.69584
USP22	15	1.5877e-05	0.00014411	0.004072	62	13	-1.216	0.99969	0.99974	0.999997	1709	0	-1.216
STRAP	15	1.6734e-05	0.00014976	0.004165	63	12	-1.0565	0.65646	0.88505	0.999997	1407	2	-1.0565
GNB1L	15	1.7115e-05	0.00015541	0.004254	64	12	-0.61191	0.99494	0.99716	0.999997	1679	1	-0.61191
HYOU1	15	3.0295e-05	0.00026278	0.007083	65	12	-1.2927	0.80585	0.94382	0.999997	1533	2	-1.2927
WDR18	15	4.3622e-05	0.00040406	0.010726	66	10	-0.95693	0.95094	0.98675	0.999997	1634	2	-0.95693
NOP16	15	4.7872e-05	0.00044362	0.0116	67	8	-0.97057	0.53824	0.82164	0.999997	1275	5	-0.97057
MGAT1	15	5.17e-05	0.00047753	0.012269	68	10	-0.59925	0.27483	0.59854	0.873146	795	4	-0.59925
COMMD3	15	5.2096e-05	0.00048318	0.012269	69	10	-1.2222	0.99998	0.99999	0.999997	1735	0	-1.2222
EXOC7	15	6.2044e-05	0.000551	0.013791	70	11	-1.0053	0.76913	0.93105	0.999997	1514	1	-1.0053
HYPK	15	6.9842e-05	0.00061881	0.01527	71	12	-0.81144	0.77132	0.93181	0.999997	1517	1	-0.81144
ACTR3	15	8.0125e-05	0.00069793	0.016983	72	11	-1.5853	0.9998	0.99984	0.999997	1713	0	-1.5853
GPN3	15	8.3379e-05	0.00074879	0.017888	73	11	-1.0757	0.94287	0.98439	0.999997	1627	3	-1.0757
WBSCR16	15	8.4579e-05	0.00076009	0.017888	74	11	-0.89863	0.99981	0.99986	0.999997	1718	0	-0.89863
EIF2B4	15	8.5513e-05	0.00076574	0.017888	75	12	-0.71937	0.86601	0.96543	0.999997	1580	1	-0.71937
NDUFA13	15	9.5172e-05	0.00083921	0.019346	76	12	-0.80507	0.66276	0.88818	0.999997	1414	1	-0.80507
TAF1	15	0.00011042	0.00097484	0.022181	77	11	-1.3361	0.91734	0.97738	0.999997	1611	2	-1.3361
HAVCR1	15	0.00011415	0.001037	0.023293	78	9	-1.0321	0.50844	0.80541	0.993493	1231	3	-1.0321
EXOC3	15	0.0001213	0.0010879	0.024126	79	11	-0.96821	0.98941	0.99608	0.999997	1672	1	-0.96821
MED20	15	0.00013507	0.0012122	0.026547	80	11	-0.84693	0.66498	0.88935	0.999997	1417	1	-0.84693
MESDC2	15	0.00013823	0.0012348	0.026708	81	10	-0.71688	0.99943	0.99936	0.999997	1702	0	-0.71688
C21orf59	15	0.00014727	0.0013139	0.028073	82	10	-1.0133	0.69047	0.90246	0.999997	1441	3	-1.0133
PPIL2	15	0.00015361	0.0013591	0.028689	83	11	-1.0434	0.56053	0.83318	0.999997	1296	1	-1.0434
CHMP1A	15	0.00016968	0.0014722	0.030106	84	10	-0.88736	0.99622	0.99747	0.999997	1682	1	-0.88736
MED8	15	0.00017013	0.0014778	0.030106	85	11	-0.93351	0.99021	0.99643	0.999997	1673	1	-0.93351
CABIN1	15	0.00017027	0.0014778	0.030106	86	12	-0.72724	0.16787	0.45194	0.783967	562	2	-0.72724
TMEM30A	15	0.00017542	0.00154	0.030659	87	9	-1.0182	0.99938	0.9993	0.999997	1700	0	-1.0182
GMPPB	15	0.00017544	0.00154	0.030659	88	11	-0.87178	0.99848	0.99843	0.999997	1694	1	-0.87178
POLRMT	15	0.00019868	0.0017152	0.033763	89	12	-0.83879	0.86523	0.96521	0.999997	1578	2	-0.83879
INTS12	15	0.00021787	0.0018395	0.035809	90	9	-0.81986	0.16994	0.45502	0.784233	568	1	-0.81986
CDC73	15	0.00025966	0.0022068	0.042487	91	11	-1.1388	0.3597	0.68368	0.920682	972	2	-1.1388
POLR3C	15	0.00026309	0.002252	0.042886	92	11	-0.92567	0.5779	0.84279	0.999997	1311	2	-0.92567
RAB10	15	0.00027451	0.0023481	0.044235	93	11	-0.80534	0.15008	0.42386	0.773902	524	3	-0.80534
RABIF	15	0.00029732	0.0025459	0.047451	94	11	-0.81141	0.30345	0.63249	0.891984	859	3	-0.81141
GTF2H3	15	0.00030293	0.0025798	0.047577	95	12	-0.57058	0.9758	0.99208	0.999997	1657	1	-0.57058
UXT	15	0.00031093	0.0026363	0.048113	96	10	-1.1127	0.6025	0.85659	0.999997	1332	1	-1.1127
FNTB	15	0.00033338	0.0027719	0.050066	97	10	-0.7907	0.98758	0.99539	0.999997	1669	1	-0.7907
COMMD2	15	0.0003532	0.0028793	0.051355	98	10	-0.53012	0.50902	0.80569	0.993493	1233	4	-0.53012
ALG2	15	0.00035555	0.0029019	0.051355	99	10	-1.0089	0.99985	0.9999	0.999997	1722	0	-1.0089
VPS29	15	0.00043492	0.0036535	0.06401	100	11	-0.59864	0.9991	0.99896	0.999997	1698	0	-0.59864
GPN1	15	0.00045918	0.0038061	0.066023	101	11	-0.78437	0.71171	0.9121	0.999997	1461	1	-0.78437
WDR82	15	0.00051582	0.0042695	0.073335	102	11	-1.1107	0.97204	0.99131	0.999997	1649	2	-1.1107
ARPC4	15	0.0005924	0.004829	0.08214	103	11	-0.62759	0.39629	0.71578	0.940063	1038	2	-0.62759
TPI1	15	0.00062149	0.0050155	0.084492	104	10	-1.1647	0.99999	0.99999	0.999997	1736	0	-1.1647
ATP5O	15	0.00070286	0.0055297	0.092268	105	10	-1.0169	0.74167	0.92155	0.999997	1484	3	-1.0169
TAF7	15	0.00072958	0.0057275	0.094667	106	9	-0.8779	0.86035	0.96341	0.999997	1574	4	-0.8779
NR2C2AP	15	0.00082874	0.0064622	0.105565	107	11	-0.46433	0.9998	0.99984	0.999997	1714	0	-0.46433
GFER	15	0.0008393	0.0065074	0.105565	108	11	-0.86574	0.99971	0.99976	0.999997	1710	0	-0.86574
CMTR1	15	0.00085293	0.0065865	0.105868	109	9	-0.85046	0.85261	0.96073	0.999997	1571	1	-0.85046
ATP6AP2	15	0.00090956	0.0069482	0.110666	110	10	-0.84856	0.99943	0.99936	0.999997	1701	0	-0.84856
ATP6V1H	15	0.0010068	0.0076207	0.120284	111	11	-0.82628	0.71668	0.91365	0.999997	1466	3	-0.82628
GREB1L	15	0.0010601	0.0079259	0.123983	112	11	-0.59373	0.99947	0.99943	0.999997	1704	0	-0.59373
POLR3H	15	0.0011186	0.0082763	0.128319	113	11	-0.77008	0.98501	0.99457	0.999997	1668	1	-0.77008
NCBP2	15	0.0011516	0.0084627	0.129875	114	11	-0.65036	0.52438	0.81401	0.997305	1259	3	-0.65036
NAA10	15	0.0011569	0.0085249	0.129875	115	10	-0.87954	0.79258	0.93923	0.999997	1527	2	-0.87954
UBE2G2	15	0.0011709	0.0086379	0.130463	116	9	-1.0597	0.6675	0.89066	0.999997	1421	4	-1.0597
CAND1	15	0.0013172	0.0095195	0.142012	117	11	-0.51055	0.78191	0.93552	0.999997	1521	4	-0.51055
ALG8	15	0.0013254	0.0095647	0.142012	118	10	-0.90451	0.84109	0.95619	0.999997	1560	3	-0.90451
EIF6	15	0.0015172	0.010808	0.159123	119	11	-1.3072	0.97467	0.99181	0.999997	1654	1	-1.3072
MEF2BNB	15	0.0015324	0.010915	0.159365	120	10	-0.73862	0.94566	0.98513	0.999997	1630	3	-0.73862
CHAF1B	15	0.001641	0.011571	0.166166	121	10	-1.0495	0.99984	0.9999	0.999997	1720	0	-1.0495
USO1	15	0.0016429	0.011571	0.166166	122	9	-0.68824	0.84611	0.95831	0.999997	1563	2	-0.68824
OSTC	15	0.001664	0.011678	0.166345	123	10	-0.81207	0.46701	0.77417	0.973348	1166	4	-0.81207
CTDP1	15	0.0016961	0.011944	0.168756	124	10	-0.56055	0.84036	0.95595	0.999997	1559	2	-0.56055
MRP63	15	0.001829	0.012859	0.180238	125	8	-0.4252	0.99945	0.99941	0.999997	1703	0	-0.4252
EMC6	15	0.0019178	0.013385	0.185507	126	11	-0.38102	0.40142	0.72009	0.943225	1044	3	-0.38102
WRB	15	0.0019299	0.013447	0.185507	127	9	-0.89788	0.16267	0.4438	0.778678	552	3	-0.89788
ARFRP1	15	0.0019954	0.013786	0.188699	128	9	-0.77317	0.99814	0.99818	0.999997	1690	1	-0.77317
DNLZ	15	0.0020322	0.014001	0.190153	129	10	-0.48398	0.64165	0.87752	0.999997	1388	4	-0.48398
ATP13A1	15	0.0026215	0.017352	0.233854	130	9	-0.42515	0.89471	0.97184	0.999997	1597	1	-0.42515
POLR2L	15	0.0028027	0.018352	0.245446	131	10	-0.61349	0.86936	0.96628	0.999997	1582	3	-0.61349
DYRK1A	15	0.0029288	0.019087	0.253338	132	10	-0.5402	0.99993	0.99995	0.999997	1728	0	-0.5402
PDRG1	15	0.0029834	0.019392	0.255453	133	10	-0.90104	0.18531	0.47757	0.788864	600	3	-0.90104
ERCC3	15	0.0032297	0.020782	0.271723	134	10	-1.0758	0.85014	0.95986	0.999997	1565	4	-1.0758
TMEM199	15	0.0033515	0.021404	0.277778	135	10	-0.59397	0.99781	0.99805	0.999997	1687	1	-0.59397
POLR2E	15	0.0034046	0.021658	0.279011	136	9	-0.7004	0.97155	0.99119	0.999997	1648	1	-0.7004
GTF3C4	15	0.0034981	0.022246	0.284491	137	10	-0.56056	0.99993	0.99994	0.999997	1727	0	-0.56056
INTS6	15	0.0037489	0.023648	0.300222	138	10	-0.73194	0.9998	0.99985	0.999997	1716	0	-0.73194
BRD2	15	0.003866	0.024207	0.305114	139	9	-0.47366	0.99992	0.99994	0.999997	1726	0	-0.47366
KIAA1033	15	0.0040411	0.025111	0.31425	140	10	-0.76471	0.31217	0.64082	0.895807	878	2	-0.76471
USP9X	15	0.0042709	0.026451	0.326977	141	9	-0.80352	0.93706	0.9828	0.999997	1622	2	-0.80352
ATP5I	15	0.0042865	0.026502	0.326977	142	8	-0.47157	0.029605	0.13412	0.607172	205	3	-0.47157
PFDN6	15	0.0043405	0.026869	0.329191	143	10	-0.78743	0.76336	0.92913	0.999997	1509	4	-0.78743
LONP1	15	0.004673	0.028609	0.348082	144	10	-0.40678	0.9739	0.99167	0.999997	1652	1	-0.40678
SBK1	15	0.0047364	0.028903	0.349232	145	10	-0.45449	0.96261	0.98936	0.999997	1640	2	-0.45449
ZNHIT1	15	0.0049482	0.030017	0.35977	146	7	-0.21587	0.65645	0.88504	0.999997	1406	3	-0.21587
WDR37	15	0.0049816	0.030186	0.35977	147	10	-0.45455	0.94727	0.9856	0.999997	1632	1	-0.45455
MRPL33	15	0.0054308	0.032514	0.384901	148	10	-0.63085	0.03661	0.15758	0.637585	223	3	-0.63085
RBBP5	15	0.0054879	0.032774	0.385374	149	10	-0.73489	0.92719	0.97998	0.999997	1613	1	-0.73489
GTF2E1	15	0.0058452	0.034594	0.404059	150	10	-0.41989	0.97891	0.99285	0.999997	1661	1	-0.41989
HSD17B10	15	0.005901	0.034894	0.404859	151	8	-0.62078	0.64941	0.88151	0.999997	1394	4	-0.62078
VPS72	15	0.0061054	0.036058	0.415614	152	10	-0.45319	0.83593	0.95452	0.999997	1555	3	-0.45319
EEFSEC	15	0.0062267	0.036629	0.417545	153	10	-0.3845	0.97935	0.99298	0.999997	1663	2	-0.3845
POLR1B	15	0.0062374	0.036702	0.417545	154	10	-0.74771	0.89664	0.97219	0.999997	1598	1	-0.74771
VPS35	15	0.0063271	0.037154	0.419962	155	10	-0.40871	0.87583	0.96771	0.999997	1586	3	-0.40871
ZNF646	15	0.0066295	0.038804	0.435802	156	10	-0.35649	0.9962	0.99747	0.999997	1681	1	-0.35649
SYP	15	0.0070861	0.041093	0.458567	157	9	-0.48024	0.73505	0.91941	0.999997	1478	3	-0.48024
SYS1	15	0.007184	0.04159	0.461179	158	10	-0.43985	0.99995	0.99997	0.999997	1730	0	-0.43985
DENND4A	15	0.0074016	0.042715	0.469462	159	10	-0.51211	0.92506	0.9794	0.999997	1612	3	-0.51211
SPATA5	15	0.007431	0.042873	0.469462	160	10	-0.43507	0.88456	0.96957	0.999997	1595	3	-0.43507
RUVBL2	15	0.007993	0.04584	0.497313	161	10	-0.74523	0.99843	0.99839	0.999997	1693	1	-0.74523
FDX1L	15	0.0080889	0.046337	0.497313	162	9	-0.50454	0.98817	0.99557	0.999997	1670	2	-0.50454
EWSR1	15	0.0081191	0.046428	0.497313	163	10	-0.40174	0.99951	0.99949	0.999997	1706	0	-0.40174
TRIAP1	15	0.0081508	0.046552	0.497313	164	10	-0.64748	0.32549	0.65317	0.903206	898	3	-0.64748
MOCS3	15	0.0087067	0.049333	0.523822	165	10	-0.48137	0.85116	0.96027	0.999997	1568	2	-0.48137
hsa-mir-6511a-4	15	0.009379	0.052574	0.551361	166	9	-0.38496	0.99736	0.99788	0.999997	1685	1	-0.38496
TMEM258	15	0.0094002	0.052678	0.551361	167	10	-0.51125	0.21623	0.52057	0.812865	678	4	-0.51125
RNMT	15	0.0095976	0.053616	0.555832	168	8	-0.43363	0.94294	0.98442	0.999997	1628	3	-0.43363
TMEM165	15	0.0099735	0.055323	0.570151	169	9	-0.43055	0.5311	0.81747	0.999997	1269	2	-0.43055
COPS6	15	0.01045	0.057205	0.583554	170	9	-0.5973	0.97047	0.99094	0.999997	1647	2	-0.5973
DHX36	15	0.010723	0.058431	0.591742	171	8	-0.32816	0.0042961	0.028044	0.387971	86	3	-0.32816
EIF3C	14	0.011037	0.05729	0.583554	172	9	-0.71952	0.87552	0.96281	0.999997	1585	1	-0.71952
SEC13	15	0.011209	0.060483	0.608996	173	9	-0.50024	0.73002	0.91779	0.999997	1474	3	-0.50024
PTPMT1	15	0.011746	0.062596	0.626676	174	8	-0.42305	0.81518	0.94719	0.999997	1542	3	-0.42305
KIAA1432	15	0.012754	0.06675	0.664463	175	9	-0.53844	0.96719	0.99029	0.999997	1644	2	-0.53844
SSR2	15	0.012964	0.067569	0.66882	176	9	-0.33512	0.99328	0.99696	0.999997	1676	1	-0.33512
DHDDS	15	0.014728	0.074763	0.735872	177	9	-0.68074	0.74397	0.92234	0.999997	1488	3	-0.68074
SSX4	15	0.015693	0.078883	0.772084	178	9	-0.54777	0.82065	0.94891	0.999997	1544	4	-0.54777
RANBP1	15	0.016308	0.081285	0.786801	179	8	-0.49992	0.93836	0.98325	0.999997	1624	2	-0.49992
SAFB	15	0.016836	0.083494	0.803748	180	7	-0.23565	0.86526	0.96523	0.999997	1579	2	-0.23565
MGEA5	15	0.017283	0.085133	0.815046	181	9	-0.405	0.99623	0.99747	0.999997	1683	1	-0.405
CCDC53	15	0.018196	0.088795	0.840915	182	8	-0.31151	0.3087	0.63757	0.894552	869	5	-0.31151
hsa-mir-3680-1	10	0.018405	0.079657	0.77533	183	6	-0.47422	0.63403	0.83251	0.999997	1379	3	-0.47422
PROX1	15	0.018835	0.09131	0.857621	184	9	-0.48391	0.87003	0.9664	0.999997	1583	3	-0.48391
TAF1B	15	0.018941	0.091757	0.857621	185	7	-0.38817	0.45397	0.76387	0.968212	1134	4	-0.38817
KCTD5	15	0.018994	0.092028	0.857621	186	8	-0.42426	0.99987	0.99991	0.999997	1723	0	-0.42426
CTR9	15	0.019153	0.092604	0.858426	187	8	-0.7904	0.98077	0.99341	0.999997	1666	1	-0.7904
NELFB	15	0.019623	0.094447	0.870896	188	9	-0.34557	0.40702	0.72492	0.947809	1055	4	-0.34557
SLC35A2	15	0.021111	0.10002	0.917449	189	8	-0.31356	0.81446	0.94693	0.999997	1541	2	-0.31356
SRP14	15	0.021537	0.10174	0.92405	190	9	-0.43711	0.49984	0.80053	0.993293	1216	2	-0.43711
KTI12	15	0.021549	0.10179	0.92405	191	8	-0.16661	0.8512	0.96029	0.999997	1570	4	-0.16661
WDR55	15	0.022104	0.10394	0.93868	192	9	-0.31486	0.7558	0.92654	0.999997	1503	2	-0.31486
IPO9	15	0.0228	0.10654	0.957223	193	9	-0.56748	0.98376	0.99419	0.999997	1667	1	-0.56748
DDX27	15	0.023998	0.11092	0.991488	194	9	-0.53231	0.65443	0.88402	0.999997	1404	2	-0.53231
RAB7A	15	0.024991	0.11476	0.999997	195	8	-0.27327	0.82969	0.95228	0.999997	1553	3	-0.27327
ATXN7L3	15	0.025033	0.11493	0.999997	196	6	-0.12222	0.21047	0.51272	0.808838	665	6	-0.12222
ARPC3	15	0.026239	0.11926	0.999997	197	6	-0.29913	0.50156	0.80149	0.993493	1219	5	-0.29913
CCT6A	15	0.026661	0.1207	0.999997	198	7	-0.0099739	0.66982	0.89184	0.999997	1423	3	-0.0099739
NUDT21	15	0.026852	0.1215	0.999997	199	7	-0.27288	0.99688	0.9977	0.999997	1684	1	-0.27288
SIN3B	15	0.027117	0.12247	0.999997	200	9	-0.40136	0.9678	0.99041	0.999997	1645	2	-0.40136
DNAJC13	15	0.029143	0.12985	0.999997	201	9	-0.35259	0.88119	0.96879	0.999997	1590	2	-0.35259
USP39	15	0.029428	0.13089	0.999997	202	9	-0.41555	0.80209	0.94257	0.999997	1530	1	-0.41555
COPS2	15	0.029429	0.13089	0.999997	203	6	-0.078446	0.1046	0.33202	0.727123	417	6	-0.078446
EXOC4	15	0.030134	0.13336	0.999997	204	8	-0.40603	0.72674	0.91672	0.999997	1468	3	-0.40603
COPS8	15	0.03062	0.13515	0.999997	205	6	-0.22507	0.49229	0.79475	0.990025	1203	4	-0.22507
TRAPPC1	15	0.031579	0.13859	0.999997	206	7	-0.31651	0.48746	0.79077	0.98888	1196	2	-0.31651
ELP5	15	0.031963	0.14002	0.999997	207	8	-0.41526	0.74996	0.92451	0.999997	1498	4	-0.41526
SNF8	15	0.032347	0.14135	0.999997	208	9	-0.49621	0.86475	0.96506	0.999997	1577	2	-0.49621
IRS1	15	0.032812	0.143	0.999997	209	7	-0.055585	0.86203	0.96406	0.999997	1576	3	-0.055585
FZR1	15	0.032966	0.14361	0.999997	210	9	-0.5298	0.91021	0.97561	0.999997	1604	2	-0.5298
NCBP1	15	0.033071	0.14395	0.999997	211	9	-0.77315	0.99279	0.99689	0.999997	1675	1	-0.77315
RPL23A	15	0.033943	0.14672	0.999997	212	7	-0.29311	0.50358	0.80262	0.993493	1222	3	-0.29311
HSPA8	15	0.034615	0.14868	0.999997	213	8	-0.59186	0.0067432	0.040607	0.431173	105	4	-0.59186
TOMM22	15	0.034886	0.14953	0.999997	214	8	-0.61314	0.93799	0.98315	0.999997	1623	2	-0.61314
CARS	15	0.035259	0.1506	0.999997	215	8	-0.42723	0.95154	0.98694	0.999997	1635	2	-0.42723
NMT1	15	0.035403	0.15107	0.999997	216	7	-0.28712	0.54475	0.8251	0.999997	1284	4	-0.28712
PIM2	15	0.040541	0.16619	0.999997	217	8	-0.30373	0.75459	0.92615	0.999997	1502	3	-0.30373
TCERG1	15	0.044703	0.1779	0.999997	218	8	-0.34207	0.62081	0.86638	0.999997	1356	3	-0.34207
PGS1	15	0.044875	0.17847	0.999997	219	7	-0.3698	0.32431	0.65209	0.902949	895	3	-0.3698
TBX6	15	0.04518	0.17924	0.999997	220	6	-0.091894	0.70458	0.9095	0.999997	1454	5	-0.091894
SLC12A9	15	0.045436	0.17996	0.999997	221	8	-0.29113	0.25452	0.57233	0.852668	750	3	-0.29113
ZBTB8OS	15	0.048805	0.189	0.999997	222	8	-0.44779	0.629	0.87073	0.999997	1373	3	-0.44779
SPAG7	15	0.051085	0.1953	0.999997	223	7	-0.34373	0.80981	0.94524	0.999997	1538	3	-0.34373
CENPA	15	0.051386	0.19629	0.999997	224	6	-0.28191	0.87201	0.96683	0.999997	1584	3	-0.28191
NonTargeting_Human_0828	1	0.052271	0.05287	0.551361	225	1	-6.547	0.94773	0.9474	0.999997	1633	0	-6.547
C19orf52	15	0.052307	0.1987	0.999997	226	8	-0.29011	0.64306	0.87821	0.999997	1390	2	-0.29011
DNAJC17	15	0.053495	0.20206	0.999997	227	8	-0.52445	0.73219	0.91843	0.999997	1477	3	-0.52445
SNAPC3	15	0.054014	0.20322	0.999997	228	7	-0.16328	0.65348	0.88356	0.999997	1403	5	-0.16328
C11orf57	15	0.05556	0.2076	0.999997	229	5	-0.085792	0.56445	0.83534	0.999997	1298	4	-0.085792
GART	15	0.056754	0.21099	0.999997	230	8	-0.40542	0.97399	0.99167	0.999997	1653	2	-0.40542
MRPL9	15	0.057255	0.21231	0.999997	231	8	-0.36765	0.091193	0.30242	0.719981	370	2	-0.36765
COPS3	15	0.060872	0.22222	0.999997	232	8	-0.24668	0.52561	0.81458	0.997305	1262	3	-0.24668
NHLRC2	15	0.063439	0.22897	0.999997	233	7	-0.43185	0.97973	0.99309	0.999997	1665	2	-0.43185
hsa-mir-6770-1	10	0.063778	0.20556	0.999997	234	6	-0.28133	0.61024	0.82022	0.999997	1345	2	-0.28133
UBE2I	15	0.0646	0.23187	0.999997	235	8	-0.32953	0.015264	0.080358	0.550352	147	3	-0.32953
CCT8	15	0.065608	0.23448	0.999997	236	8	-0.52775	0.34792	0.67299	0.91543	940	5	-0.52775
ATP6V0D1	15	0.066653	0.23713	0.999997	237	6	-0.14619	0.45526	0.76484	0.968212	1136	6	-0.14619
WDR61	15	0.069368	0.24409	0.999997	238	8	-0.40092	0.93376	0.98194	0.999997	1617	3	-0.40092
PRPF38B	15	0.069656	0.24493	0.999997	239	8	-0.61434	0.90441	0.97409	0.999997	1603	3	-0.61434
ACTR6	15	0.069931	0.24565	0.999997	240	6	-0.12389	0.65281	0.88328	0.999997	1400	5	-0.12389
ASH2L	15	0.070331	0.24662	0.999997	241	8	-0.38981	0.94535	0.98506	0.999997	1629	1	-0.38981
FAM57B	15	0.070816	0.24787	0.999997	242	8	-0.34159	0.95833	0.9886	0.999997	1638	2	-0.34159
SULT1A2	15	0.072017	0.25082	0.999997	243	6	-0.15639	0.87653	0.96785	0.999997	1588	1	-0.15639
SSX2	15	0.073275	0.25391	0.999997	244	8	-0.34401	0.71363	0.91266	0.999997	1464	2	-0.34401
GIGYF2	15	0.073693	0.25504	0.999997	245	8	-0.35999	0.99947	0.99944	0.999997	1705	0	-0.35999
URI1	15	0.0742	0.25629	0.999997	246	6	-0.31957	0.34128	0.66708	0.913069	928	5	-0.31957
STX10	15	0.074376	0.25667	0.999997	247	8	-0.29027	0.72784	0.91705	0.999997	1470	2	-0.29027
CERS2	15	0.074678	0.25754	0.999997	248	8	-0.24012	0.5513	0.8285	0.999997	1289	3	-0.24012
VPS51	15	0.075386	0.25929	0.999997	249	8	-0.47532	0.82146	0.9492	0.999997	1545	2	-0.47532
PIK3R4	15	0.075529	0.25968	0.999997	250	4	-0.037411	0.17338	0.45983	0.784233	573	5	-0.037411
MFAP1	14	0.076385	0.25843	0.999997	251	7	-0.52743	0.46857	0.76733	0.969909	1170	4	-0.52743
COMMD10	15	0.077887	0.26559	0.999997	252	7	-0.026588	0.41856	0.73477	0.952608	1075	5	-0.026588
WARS	15	0.078226	0.26648	0.999997	253	5	0.027154	0.15898	0.43789	0.77796	542	4	0.027154
TFAM	15	0.080898	0.27308	0.999997	254	8	-0.46372	0.62526	0.86878	0.999997	1364	2	-0.46372
CIAO1	15	0.08167	0.27495	0.999997	255	8	-0.31143	0.97273	0.99148	0.999997	1651	1	-0.31143
RBM3	15	0.082075	0.27587	0.999997	256	8	-0.37092	0.22984	0.53942	0.823227	711	3	-0.37092
PTAR1	15	0.082426	0.27683	0.999997	257	7	-0.0085322	0.55879	0.83231	0.999997	1295	4	-0.0085322
ALG14	15	0.083482	0.27938	0.999997	258	8	-0.43435	0.30421	0.63321	0.891984	861	5	-0.43435
NRBP1	15	0.083809	0.2801	0.999997	259	8	-0.26569	0.6482	0.88089	0.999997	1393	2	-0.26569
NOMO1	15	0.085678	0.28483	0.999997	260	8	-0.27261	0.791	0.93858	0.999997	1525	3	-0.27261
CPSF3L	15	0.086678	0.28721	0.999997	261	8	-0.32119	0.97918	0.99295	0.999997	1662	2	-0.32119
NonTargeting_Human_0979	1	0.087693	0.088434	0.840915	262	1	-4.7167	0.91231	0.91261	0.999997	1607	0	-4.7167
CPSF2	15	0.089708	0.29452	0.999997	263	7	-0.065781	0.22275	0.5298	0.81637	693	6	-0.065781
PIGQ	15	0.08983	0.2949	0.999997	264	7	-0.17983	0.62575	0.86901	0.999997	1365	2	-0.17983
GLOD5	15	0.089842	0.29492	0.999997	265	8	-0.28419	0.91386	0.97654	0.999997	1608	2	-0.28419
ZBTB10	15	0.092381	0.30106	0.999997	266	8	-0.20788	0.41725	0.73364	0.952608	1072	3	-0.20788
PFN1	15	0.092563	0.30149	0.999997	267	7	-0.012308	0.89826	0.97258	0.999997	1599	2	-0.012308
EIF3F	15	0.0936	0.30405	0.999997	268	6	-0.3323	0.97777	0.99255	0.999997	1659	2	-0.3323
MTHFD1	15	0.095719	0.3085	0.999997	269	7	-0.17934	0.93091	0.98109	0.999997	1614	2	-0.17934
MKL1	15	0.09604	0.30905	0.999997	270	7	-0.20562	0.80317	0.94295	0.999997	1531	3	-0.20562
ZNF143	15	0.09954	0.31607	0.999997	271	5	0.0049511	0.55646	0.83099	0.999997	1293	4	0.0049511
SNRPD1	15	0.10038	0.31741	0.999997	272	6	0.086516	0.31076	0.63949	0.894873	874	6	0.086516
SNAPC2	15	0.11216	0.33967	0.999997	273	6	-0.13981	0.85075	0.96012	0.999997	1566	4	-0.13981
ZG16B	15	0.11616	0.3468	0.999997	274	6	-0.22936	0.28821	0.61553	0.881047	825	3	-0.22936
KAT8	14	0.11689	0.3438	0.999997	275	7	-0.32022	0.79249	0.93677	0.999997	1526	4	-0.32022
NonTargeting_Human_0253	1	0.11713	0.11829	0.999997	276	1	-1.6692	0.88287	0.88281	0.999997	1591	0	-1.6692
PAM16	15	0.11728	0.34897	0.999997	277	7	-0.14837	0.69388	0.90416	0.999997	1447	2	-0.14837
PLA2G10	15	0.11815	0.35048	0.999997	278	7	-0.20987	0.8461	0.95831	0.999997	1562	2	-0.20987
MED9	15	0.12139	0.35673	0.999997	279	7	-0.15555	0.70901	0.91122	0.999997	1458	2	-0.15555
SEC61B	15	0.12322	0.36016	0.999997	280	6	-0.21531	0.15637	0.43401	0.77796	536	2	-0.21531
RNF151	15	0.12573	0.36473	0.999997	281	7	-0.12113	0.58119	0.84453	0.999997	1313	3	-0.12113
UPF1	15	0.12632	0.36589	0.999997	282	7	-0.27574	0.3421	0.66785	0.913407	931	4	-0.27574
TBC1D25	15	0.13734	0.38616	0.999997	283	6	-0.081442	0.62723	0.86974	0.999997	1368	3	-0.081442
NonTargeting_Human_0880	1	0.1382	0.13932	0.999997	284	1	-0.96172	0.8618	0.86186	0.999997	1575	0	-0.96172
NonTargeting_Human_0436	1	0.14205	0.14322	0.999997	285	1	-1.0612	0.85795	0.85801	0.999997	1573	0	-1.0612
MEF2B	15	0.14271	0.39519	0.999997	286	7	-0.3321	0.9661	0.99007	0.999997	1643	2	-0.3321
NonTargeting_Human_0892	1	0.14484	0.14588	0.999997	287	1	-1.6068	0.85516	0.85496	0.999997	1572	0	-1.6068
INTS8	15	0.14599	0.40071	0.999997	288	6	-0.21931	0.8835	0.96928	0.999997	1594	3	-0.21931
MARS2	15	0.14666	0.40198	0.999997	289	7	-0.37873	0.99997	0.99998	0.999997	1734	0	-0.37873
DEXI	15	0.14684	0.40233	0.999997	290	7	-0.14977	0.47517	0.78093	0.980074	1180	2	-0.14977
HSPE1	14	0.14713	0.40193	0.999997	291	7	-0.40204	0.38046	0.69811	0.930817	1005	3	-0.40204
PAGE4	15	0.14936	0.40659	0.999997	292	6	-0.10423	0.58607	0.84744	0.999997	1316	4	-0.10423
STAG2	15	0.15022	0.40801	0.999997	293	5	-0.24789	0.99064	0.99653	0.999997	1674	1	-0.24789
GTF3A	15	0.1505	0.40843	0.999997	294	7	-0.181	0.79632	0.94057	0.999997	1529	3	-0.181
NonTargeting_Human_0995	1	0.15198	0.15274	0.999997	295	1	-0.99581	0.84802	0.84805	0.999997	1564	0	-0.99581
VPS33A	15	0.15368	0.41423	0.999997	296	7	0.13968	0.1469	0.41857	0.77192	517	5	0.13968
NonTargeting_Human_0305	1	0.1569	0.15738	0.999997	297	1	-1.176	0.8431	0.84319	0.999997	1561	0	-1.176
CDC23	15	0.1587	0.42298	0.999997	298	7	-0.17751	0.83774	0.95509	0.999997	1556	3	-0.17751
NonTargeting_Human_0073	1	0.16001	0.16059	0.999997	299	1	-0.70947	0.83999	0.83995	0.999997	1558	0	-0.70947
NonTargeting_Human_0301	1	0.161	0.16163	0.999997	300	1	-1.9537	0.839	0.83892	0.999997	1557	0	-1.9537
MRPL28	15	0.16663	0.4371	0.999997	301	7	-0.23994	0.99871	0.99858	0.999997	1695	1	-0.23994
PRPF6	15	0.16749	0.43842	0.999997	302	7	-0.25481	0.49332	0.79546	0.990025	1207	6	-0.25481
FBXL5	15	0.17054	0.44331	0.999997	303	7	-0.25265	0.2787	0.60347	0.874826	806	4	-0.25265
PHKG2	15	0.1709	0.44382	0.999997	304	7	-0.17158	0.20737	0.50851	0.808838	657	4	-0.17158
NonTargeting_Human_0067	1	0.17182	0.17221	0.999997	305	1	-0.52011	0.82818	0.82798	0.999997	1552	0	-0.52011
POLR2C	15	0.17235	0.44617	0.999997	306	7	-0.26051	0.68082	0.89738	0.999997	1432	4	-0.26051
RPP38	15	0.1729	0.44698	0.999997	307	7	-0.12261	0.77225	0.93215	0.999997	1518	3	-0.12261
NonTargeting_Human_0882	1	0.17452	0.17503	0.999997	308	1	-1.4823	0.82548	0.82537	0.999997	1550	0	-1.4823
UBE2Q1	15	0.17673	0.45348	0.999997	309	7	-0.23639	0.97209	0.99131	0.999997	1650	2	-0.23639
NonTargeting_Human_0579	1	0.17674	0.17706	0.999997	310	1	-0.6814	0.82326	0.82303	0.999997	1547	0	-0.6814
NonTargeting_Human_0883	1	0.1769	0.17727	0.999997	311	1	-1.2457	0.8231	0.82288	0.999997	1546	0	-1.2457
MRPS16	15	0.17858	0.45662	0.999997	312	7	-0.23596	0.74664	0.92337	0.999997	1491	4	-0.23596
NonTargeting_Human_0212	1	0.18117	0.18119	0.999997	313	1	-0.88979	0.81883	0.81863	0.999997	1543	0	-0.88979
DROSHA	15	0.18361	0.46472	0.999997	314	7	-0.33364	0.46183	0.77006	0.969909	1154	3	-0.33364
RPL13A	13	0.18448	0.44886	0.999997	315	6	-0.31612	0.073589	0.25493	0.700273	324	5	-0.31612
EXT1	15	0.18625	0.46897	0.999997	316	7	-0.16614	0.40658	0.72452	0.947809	1053	6	-0.16614
NonTargeting_Human_0591	1	0.18666	0.18653	0.999997	317	1	-0.70206	0.81334	0.81333	0.997163	1540	0	-0.70206
RTBDN	15	0.18788	0.47156	0.999997	318	6	0.0089396	0.097101	0.31559	0.724023	392	4	0.0089396
NonTargeting_Human_0984	1	0.19019	0.18996	0.999997	319	1	-0.75461	0.80981	0.80989	0.99439	1539	0	-0.75461
ZNF213	15	0.19039	0.47549	0.999997	320	4	-0.05318	0.95766	0.98853	0.999997	1636	2	-0.05318
NonTargeting_Human_0189	1	0.19076	0.19055	0.999997	321	1	-0.52105	0.80924	0.80928	0.99439	1537	0	-0.52105
NonTargeting_Human_0681	1	0.19142	0.19124	0.999997	322	1	-1.1021	0.80858	0.80876	0.99439	1536	0	-1.1021
CPSF4	15	0.19221	0.47831	0.999997	323	6	-0.066365	0.28028	0.6056	0.874826	810	3	-0.066365
NonTargeting_Human_0900	1	0.19265	0.19244	0.999997	324	1	-0.54548	0.80735	0.80763	0.994361	1534	0	-0.54548
HNRNPA2B1	15	0.19331	0.48003	0.999997	325	7	-0.31038	0.74087	0.92133	0.999997	1482	2	-0.31038
NonTargeting_Human_0595	1	0.19461	0.19434	0.999997	326	1	-0.4482	0.80539	0.80589	0.993493	1532	0	-0.4482
RCC1	15	0.19505	0.48287	0.999997	327	7	-0.27911	0.62131	0.86666	0.999997	1357	2	-0.27911
PGM3	15	0.19998	0.49068	0.999997	328	5	-0.015771	0.22385	0.53132	0.816853	697	7	-0.015771
LAMTOR4	15	0.20102	0.49224	0.999997	329	6	-0.087997	0.53975	0.82246	0.999997	1278	4	-0.087997
LSM2	15	0.20264	0.49458	0.999997	330	5	-0.1645	0.51023	0.80636	0.993493	1236	5	-0.1645
METTL14	15	0.20307	0.49532	0.999997	331	7	-0.11517	0.69266	0.90353	0.999997	1445	3	-0.11517
LSM7	15	0.2034	0.49581	0.999997	332	7	-0.26895	0.14628	0.41722	0.771071	515	5	-0.26895
CACNA1A	15	0.20541	0.4991	0.999997	333	6	0.055671	0.61297	0.86247	0.999997	1349	5	0.055671
NonTargeting_Human_0787	1	0.20642	0.20625	0.999997	334	1	-0.66012	0.79358	0.79399	0.990025	1528	0	-0.66012
NonTargeting_Human_0460	1	0.20913	0.20884	0.999997	335	1	-0.85347	0.79087	0.79137	0.98893	1524	0	-0.85347
XAGE1A	15	0.21166	0.50865	0.999997	336	7	-0.2107	0.83197	0.95307	0.999997	1554	3	-0.2107
NonTargeting_Human_0371	1	0.21183	0.21145	0.999997	337	1	-0.56212	0.78817	0.7888	0.987125	1523	0	-0.56212
NonTargeting_Human_0621	1	0.21372	0.21343	0.999997	338	1	-0.76032	0.78628	0.78699	0.985566	1522	0	-0.76032
SMC1A	14	0.21798	0.50453	0.999997	339	6	-0.096406	0.93397	0.98141	0.999997	1618	3	-0.096406
NonTargeting_Human_0219	1	0.222	0.22175	0.999997	340	1	-0.53355	0.778	0.77864	0.977909	1520	0	-0.53355
NonTargeting_Human_0959	1	0.22602	0.22587	0.999997	341	1	-0.47269	0.77398	0.77446	0.973348	1519	0	-0.47269
METAP1D	15	0.2273	0.52814	0.999997	342	6	-0.036657	0.95807	0.98858	0.999997	1637	2	-0.036657
hsa-mir-3670-1	5	0.22845	0.4084	0.999997	343	2	-0.19297	0.90133	0.90166	0.999997	1600	0	-0.19297
NonTargeting_Human_0340	1	0.22897	0.22904	0.999997	344	1	-0.44131	0.77103	0.77148	0.970998	1516	0	-0.44131
DAP3	15	0.22986	0.53098	0.999997	345	6	-0.19876	0.93705	0.98279	0.999997	1621	2	-0.19876
NonTargeting_Human_0752	1	0.23044	0.2304	0.999997	346	1	-0.46447	0.76956	0.77002	0.969909	1515	0	-0.46447
NonTargeting_Human_0851	1	0.23249	0.23252	0.999997	347	1	-0.78782	0.76751	0.76804	0.969909	1513	0	-0.78782
NonTargeting_Human_0199	1	0.23586	0.23573	0.999997	348	1	-0.65128	0.76414	0.76437	0.968212	1512	0	-0.65128
NonTargeting_Human_0600	1	0.23651	0.23646	0.999997	349	1	-0.40495	0.76349	0.76374	0.968212	1511	0	-0.40495
NonTargeting_Human_0577	1	0.23659	0.23656	0.999997	350	1	-0.59229	0.76341	0.76368	0.968212	1510	0	-0.59229
NonTargeting_Human_0753	1	0.23676	0.23675	0.999997	351	1	-0.54662	0.76324	0.76351	0.968212	1508	0	-0.54662
SPSB3	15	0.23684	0.53914	0.999997	352	6	-0.075005	0.33438	0.66106	0.907659	918	2	-0.075005
GTF2H2	15	0.23888	0.54143	0.999997	353	5	0.30865	0.29778	0.62704	0.88881	848	6	0.30865
NonTargeting_Human_0690	1	0.24131	0.24127	0.999997	354	1	-0.64748	0.75869	0.7591	0.966796	1507	0	-0.64748
NonTargeting_Human_0456	1	0.2416	0.24156	0.999997	355	1	-0.36873	0.7584	0.75876	0.966796	1506	0	-0.36873
TMEM221	15	0.24162	0.54463	0.999997	356	6	-0.28294	0.49546	0.79715	0.991199	1209	6	-0.28294
NonTargeting_Human_0049	1	0.2425	0.2424	0.999997	357	1	-0.70305	0.7575	0.75795	0.966796	1505	0	-0.70305
NonTargeting_Human_0547	1	0.24406	0.24406	0.999997	358	1	-0.72948	0.75594	0.75631	0.966488	1504	0	-0.72948
NonTargeting_Human_0893	1	0.24635	0.24628	0.999997	359	1	-0.66749	0.75365	0.75397	0.966317	1501	0	-0.66749
RUVBL1	15	0.24669	0.55068	0.999997	360	6	-0.05235	0.50688	0.80454	0.993493	1226	4	-0.05235
UBA3	15	0.24701	0.55106	0.999997	361	3	0.1165	0.62686	0.86959	0.999997	1367	5	0.1165
C19orf57	15	0.24816	0.55234	0.999997	362	6	-0.17421	0.43542	0.74913	0.962928	1100	6	-0.17421
NonTargeting_Human_0857	1	0.24824	0.24821	0.999997	363	1	-0.54974	0.75176	0.75205	0.964567	1500	0	-0.54974
NonTargeting_Human_0078	1	0.2498	0.24969	0.999997	364	1	-0.54294	0.7502	0.75047	0.963942	1499	0	-0.54294
NonTargeting_Human_0766	1	0.25135	0.25114	0.999997	365	1	-0.27108	0.74865	0.74895	0.962928	1494	0	-0.27108
SLC38A5	15	0.25167	0.55632	0.999997	366	6	-0.34358	0.62763	0.86995	0.999997	1369	5	-0.34358
ELP3	15	0.25269	0.55752	0.999997	367	6	-0.29699	0.9345	0.98212	0.999997	1619	1	-0.29699
NonTargeting_Human_0109	1	0.25291	0.25278	0.999997	368	1	-0.27519	0.74709	0.74758	0.962357	1492	0	-0.27519
NonTargeting_Human_0404	1	0.25348	0.25334	0.999997	369	1	-0.52694	0.74652	0.74695	0.962249	1490	0	-0.52694
ARIH1	15	0.25446	0.55966	0.999997	370	5	-0.16146	0.96017	0.98887	0.999997	1639	2	-0.16146
NonTargeting_Human_0607	1	0.25586	0.25569	0.999997	371	1	-0.77725	0.74414	0.74452	0.959817	1489	0	-0.77725
NonTargeting_Human_0335	1	0.25685	0.25667	0.999997	372	1	-0.42051	0.74315	0.74361	0.95935	1486	0	-0.42051
NonTargeting_Human_0888	1	0.25963	0.25954	0.999997	373	1	-0.68458	0.74037	0.74068	0.956285	1481	0	-0.68458
C6orf62	15	0.26197	0.56846	0.999997	374	2	0.22452	0.1335	0.39275	0.761231	483	6	0.22452
NonTargeting_Human_0986	1	0.26242	0.26227	0.999997	375	1	-0.37637	0.73758	0.73802	0.954255	1480	0	-0.37637
RPL28	15	0.26586	0.57284	0.999997	376	6	-0.29186	0.19541	0.49188	0.797459	629	4	-0.29186
NonTargeting_Human_0769	1	0.26964	0.26958	0.999997	377	1	-0.37813	0.73036	0.73064	0.949941	1476	0	-0.37813
NonTargeting_Human_0957	1	0.26997	0.26992	0.999997	378	1	-0.83324	0.73003	0.73034	0.949941	1475	0	-0.83324
NonTargeting_Human_0333	1	0.27029	0.2702	0.999997	379	1	-0.3268	0.72971	0.73004	0.949941	1473	0	-0.3268
hsa-mir-550a-1	9	0.27079	0.5171	0.999997	380	3	0.35143	0.18083	0.41989	0.77192	588	5	0.35143
NonTargeting_Human_0352	1	0.27087	0.27082	0.999997	381	1	-0.30233	0.72913	0.72952	0.949941	1472	0	-0.30233
NonTargeting_Human_0482	1	0.27202	0.27197	0.999997	382	1	-0.36203	0.72798	0.7284	0.949941	1471	0	-0.36203
NonTargeting_Human_0955	1	0.27226	0.27222	0.999997	383	1	-0.58005	0.72774	0.7282	0.949941	1469	0	-0.58005
NonTargeting_Human_0043	1	0.28038	0.28005	0.999997	384	1	-0.23664	0.71962	0.71992	0.943225	1467	0	-0.23664
SRP9	15	0.28164	0.59043	0.999997	385	5	0.26001	0.25681	0.5754	0.85602	759	7	0.26001
HTRA2	15	0.28291	0.59201	0.999997	386	6	-0.11773	0.74247	0.92182	0.999997	1485	3	-0.11773
PPAT	15	0.28412	0.59328	0.999997	387	6	-0.28487	0.60509	0.85804	0.999997	1337	3	-0.28487
NonTargeting_Human_0991	1	0.28481	0.28436	0.999997	388	1	-0.21023	0.71519	0.71547	0.940063	1465	0	-0.21023
NonTargeting_Human_0415	1	0.2871	0.28667	0.999997	389	1	-0.36066	0.7129	0.71316	0.938665	1463	0	-0.36066
NonTargeting_Human_0293	1	0.28759	0.28726	0.999997	390	1	-0.36456	0.71241	0.7126	0.938665	1462	0	-0.36456
NonTargeting_Human_0535	1	0.28997	0.28963	0.999997	391	1	-0.51221	0.71003	0.71014	0.936877	1460	0	-0.51221
NonTargeting_Human_0320	1	0.29079	0.29045	0.999997	392	1	-0.44748	0.70921	0.70939	0.936584	1459	0	-0.44748
SAP130	15	0.29112	0.60065	0.999997	393	5	-0.063828	0.53413	0.8192	0.999997	1271	4	-0.063828
NonTargeting_Human_0010	1	0.29169	0.29135	0.999997	394	1	-0.29664	0.70831	0.7084	0.936584	1457	0	-0.29664
NonTargeting_Human_0718	1	0.29219	0.29187	0.999997	395	1	-0.29914	0.70781	0.70792	0.936584	1456	0	-0.29914
RPUSD4	15	0.29373	0.60344	0.999997	396	6	-0.26938	0.419	0.73512	0.952608	1076	3	-0.26938
NonTargeting_Human_0184	1	0.29547	0.29539	0.999997	397	1	-0.49394	0.70453	0.70499	0.935715	1453	0	-0.49394
NonTargeting_Human_0467	1	0.29678	0.29675	0.999997	398	1	-0.37106	0.70322	0.70358	0.934548	1452	0	-0.37106
NonTargeting_Human_0181	1	0.29702	0.29698	0.999997	399	1	-0.32958	0.70298	0.70333	0.934548	1451	0	-0.32958
NonTargeting_Human_0886	1	0.29907	0.299	0.999997	400	1	-0.46687	0.70093	0.70135	0.933005	1450	0	-0.46687
NonTargeting_Human_0032	1	0.29981	0.29969	0.999997	401	1	-0.30604	0.70019	0.70063	0.932751	1449	0	-0.30604
EIF2S2	15	0.30008	0.61041	0.999997	402	6	-0.20847	0.30169	0.63091	0.891181	853	4	-0.20847
SHC1	15	0.30033	0.61064	0.999997	403	6	0.16874	0.21329	0.51685	0.81068	672	6	0.16874
SREBF1	15	0.30144	0.61173	0.999997	404	4	0.20174	0.50856	0.80548	0.993493	1232	5	0.20174
TBC1D22A	15	0.30313	0.61351	0.999997	405	5	-0.062504	0.99746	0.99793	0.999997	1686	1	-0.062504
NonTargeting_Human_0921	1	0.30686	0.30646	0.999997	406	1	-0.71993	0.69314	0.69367	0.925592	1446	0	-0.71993
NonTargeting_Human_0412	1	0.30809	0.30759	0.999997	407	1	-0.23693	0.69191	0.69258	0.924848	1444	0	-0.23693
UBE2L3	15	0.30824	0.61919	0.999997	408	5	-0.083969	0.44936	0.75994	0.9669	1126	6	-0.083969
NonTargeting_Human_0922	1	0.30834	0.3078	0.999997	409	1	-0.41362	0.69166	0.69229	0.924848	1443	0	-0.41362
NonTargeting_Human_0470	1	0.30932	0.30876	0.999997	410	1	-0.23986	0.69068	0.69132	0.924575	1442	0	-0.23986
NonTargeting_Human_0382	1	0.31039	0.30986	0.999997	411	1	-0.27255	0.68961	0.69028	0.923889	1440	0	-0.27255
CORO1A	15	0.31054	0.62162	0.999997	412	6	-0.19855	0.94154	0.98405	0.999997	1626	3	-0.19855
NonTargeting_Human_0896	1	0.31457	0.314	0.999997	413	1	-0.24351	0.68543	0.68619	0.921228	1438	0	-0.24351
ANO8	15	0.31559	0.62718	0.999997	414	5	-0.098291	0.26336	0.58394	0.861882	772	4	-0.098291
KLHL20	15	0.31582	0.62739	0.999997	415	6	-0.031319	0.076696	0.26908	0.70468	333	3	-0.031319
NonTargeting_Human_0342	1	0.31588	0.31529	0.999997	416	1	-0.30173	0.68412	0.68487	0.920864	1437	0	-0.30173
CLK2	15	0.31682	0.62848	0.999997	417	6	-0.09244	0.61891	0.86549	0.999997	1354	4	-0.09244
NonTargeting_Human_0703	1	0.3181	0.31745	0.999997	418	1	-0.44651	0.6819	0.68256	0.920682	1433	0	-0.44651
NonTargeting_Human_0515	1	0.32047	0.32006	0.999997	419	1	-0.24195	0.67953	0.68003	0.919306	1431	0	-0.24195
METTL17	15	0.32061	0.63252	0.999997	420	6	-0.14086	0.18238	0.47331	0.786477	592	4	-0.14086
GTPBP5	15	0.32086	0.63279	0.999997	421	6	-0.10212	0.39398	0.71364	0.938665	1033	4	-0.10212
NonTargeting_Human_0518	1	0.32261	0.3222	0.999997	422	1	-0.35523	0.67739	0.67797	0.918637	1430	0	-0.35523
ABCB4	15	0.32416	0.63631	0.999997	423	6	-0.069005	0.74337	0.92212	0.999997	1487	4	-0.069005
NonTargeting_Human_0180	1	0.32482	0.32437	0.999997	424	1	-0.21281	0.67518	0.67586	0.916497	1429	0	-0.21281
NonTargeting_Human_0435	1	0.32597	0.32553	0.999997	425	1	-0.33165	0.67403	0.67472	0.915658	1428	0	-0.33165
NonTargeting_Human_0240	1	0.32695	0.32645	0.999997	426	1	-0.16961	0.67305	0.67383	0.915658	1427	0	-0.16961
DARS	15	0.32762	0.63994	0.999997	427	4	-0.056074	0.82339	0.94991	0.999997	1548	4	-0.056074
NonTargeting_Human_0721	1	0.32802	0.3276	0.999997	428	1	-0.36207	0.67198	0.67287	0.91543	1426	0	-0.36207
NonTargeting_Human_0328	1	0.3281	0.3277	0.999997	429	1	-0.30382	0.6719	0.67282	0.91543	1425	0	-0.30382
NonTargeting_Human_0130	1	0.32933	0.32888	0.999997	430	1	-0.29481	0.67067	0.67166	0.91543	1424	0	-0.29481
CEBPZ	15	0.3305	0.64314	0.999997	431	5	-0.14033	0.91408	0.97662	0.999997	1609	3	-0.14033
NonTargeting_Human_0536	1	0.33187	0.3314	0.999997	432	1	-0.18021	0.66813	0.66927	0.914105	1422	0	-0.18021
CEP120	15	0.33357	0.64603	0.999997	433	5	-0.10342	0.42188	0.73769	0.954255	1083	3	-0.10342
NonTargeting_Human_0430	1	0.33425	0.33388	0.999997	434	1	-0.62285	0.66575	0.66678	0.913069	1419	0	-0.62285
NonTargeting_Human_0901	1	0.33441	0.33405	0.999997	435	1	-0.52274	0.66559	0.66659	0.913069	1418	0	-0.52274
SLX4	15	0.33567	0.64834	0.999997	436	4	-0.055132	0.70572	0.91003	0.999997	1455	2	-0.055132
SNAI1	15	0.3364	0.64917	0.999997	437	6	0.00097566	0.34949	0.67432	0.915658	945	5	0.00097566
NonTargeting_Human_0970	1	0.33933	0.33927	0.999997	438	0	-0.50338	0.66067	0.66166	0.907778	1411	0	-0.50338
HIST2H2AA3	15	0.33982	0.65243	0.999997	439	5	-0.14702	0.93517	0.98225	0.999997	1620	2	-0.14702
NonTargeting_Human_0850	1	0.34007	0.33994	0.999997	440	0	-0.23565	0.65993	0.66104	0.907659	1410	0	-0.23565
NonTargeting_Human_0781	1	0.34048	0.34054	0.999997	441	0	-0.19942	0.65952	0.66065	0.907659	1409	0	-0.19942
NonTargeting_Human_0571	1	0.34089	0.34093	0.999997	442	0	-0.2625	0.65911	0.66035	0.907659	1408	0	-0.2625
CTCF	15	0.34302	0.65574	0.999997	443	4	0.16953	0.060241	0.23002	0.687157	284	6	0.16953
NonTargeting_Human_0641	1	0.34376	0.34413	0.999997	444	0	-0.24039	0.65624	0.65771	0.906618	1405	0	-0.24039
TRA2B	15	0.34438	0.65701	0.999997	445	6	-0.26267	0.36644	0.68968	0.923793	985	5	-0.26267
BRICD5	15	0.34681	0.65958	0.999997	446	5	0.10049	0.82586	0.95085	0.999997	1551	3	0.10049
NonTargeting_Human_0008	1	0.34704	0.34713	0.999997	447	0	-0.20434	0.65296	0.65433	0.903491	1401	0	-0.20434
NonTargeting_Human_0106	1	0.34901	0.34902	0.999997	448	0	-0.16942	0.65099	0.65247	0.902949	1399	0	-0.16942
NonTargeting_Human_0508	1	0.34909	0.3491	0.999997	449	0	-0.30754	0.65091	0.65239	0.902949	1398	0	-0.30754
NonTargeting_Human_0455	1	0.34958	0.34962	0.999997	450	0	-0.33736	0.65042	0.65183	0.902949	1397	0	-0.33736
NonTargeting_Human_0988	1	0.35007	0.35016	0.999997	451	0	-0.3113	0.64993	0.65141	0.902949	1396	0	-0.3113
NonTargeting_Human_0250	1	0.3504	0.35047	0.999997	452	0	-0.18326	0.6496	0.65113	0.902949	1395	0	-0.18326
SRP19	15	0.35228	0.66528	0.999997	453	5	0.12143	0.37904	0.70051	0.932751	1002	6	0.12143
NonTargeting_Human_0707	1	0.35655	0.35657	0.999997	454	0	-0.25828	0.64345	0.64478	0.897972	1392	0	-0.25828
NonTargeting_Human_0497	1	0.35672	0.35673	0.999997	455	0	-0.18876	0.64328	0.64461	0.897972	1391	0	-0.18876
NonTargeting_Human_0420	1	0.35795	0.35792	0.999997	456	0	-0.27588	0.64205	0.64333	0.897384	1389	0	-0.27588
NonTargeting_Human_0748	1	0.35852	0.35847	0.999997	457	0	-0.25512	0.64148	0.64281	0.897373	1387	0	-0.25512
NonTargeting_Human_0644	1	0.36016	0.36008	0.999997	458	0	-0.20575	0.63984	0.64118	0.895807	1386	0	-0.20575
NonTargeting_Human_0827	1	0.36254	0.36238	0.999997	459	0	-0.24622	0.63746	0.63875	0.894552	1385	0	-0.24622
NonTargeting_Human_0760	1	0.3627	0.36251	0.999997	460	0	-0.25407	0.6373	0.63855	0.894552	1384	0	-0.25407
NonTargeting_Human_0741	1	0.36295	0.36277	0.999997	461	0	-0.17491	0.63705	0.63829	0.894552	1383	0	-0.17491
NonTargeting_Human_0677	1	0.36409	0.36397	0.999997	462	0	-0.26443	0.63591	0.63714	0.894552	1382	0	-0.26443
NonTargeting_Human_0422	1	0.36467	0.36449	0.999997	463	0	-0.17542	0.63533	0.6366	0.894552	1381	0	-0.17542
NonTargeting_Human_0399	1	0.36483	0.36464	0.999997	464	0	-0.15298	0.63517	0.63642	0.894552	1380	0	-0.15298
EIF5A	15	0.36638	0.67991	0.999997	465	5	-0.13289	0.66365	0.88858	0.999997	1415	4	-0.13289
NonTargeting_Human_0338	1	0.36787	0.36783	0.999997	466	0	-0.23032	0.63213	0.63335	0.891984	1378	0	-0.23032
HDAC6	15	0.36827	0.68192	0.999997	467	6	-0.18255	0.88869	0.97048	0.999997	1596	3	-0.18255
GATS	15	0.36938	0.68293	0.999997	468	5	-0.1478	0.66458	0.88917	0.999997	1416	4	-0.1478
NonTargeting_Human_0369	1	0.36992	0.36992	0.999997	469	0	-0.21042	0.63008	0.63125	0.891181	1375	0	-0.21042
NonTargeting_Human_0778	1	0.37008	0.37002	0.999997	470	0	-0.17711	0.62992	0.63107	0.891181	1374	0	-0.17711
MCM3	15	0.37124	0.68472	0.999997	471	4	-0.024261	0.018895	0.096311	0.557154	168	4	-0.024261
METAP1	15	0.37137	0.68486	0.999997	472	5	-0.21539	0.80745	0.94432	0.999997	1535	2	-0.21539
NonTargeting_Human_0168	1	0.37172	0.37169	0.999997	473	0	-0.24931	0.62828	0.62931	0.890589	1371	0	-0.24931
KDM8	15	0.37199	0.68541	0.999997	474	5	0.16317	0.10092	0.324	0.727123	404	7	0.16317
NonTargeting_Human_0770	1	0.37229	0.37225	0.999997	475	0	-0.20154	0.62771	0.6287	0.890445	1370	0	-0.20154
PQBP1	15	0.37262	0.68613	0.999997	476	5	-0.037116	0.99399	0.99704	0.999997	1678	1	-0.037116
ACO2	15	0.3743	0.68765	0.999997	477	6	-0.15048	0.74902	0.92416	0.999997	1495	4	-0.15048
NonTargeting_Human_0670	1	0.37492	0.37498	0.999997	478	0	-0.15536	0.62508	0.62593	0.888678	1363	0	-0.15536
NonTargeting_Human_0179	1	0.3768	0.37688	0.999997	479	0	-0.25581	0.6232	0.62391	0.886524	1361	0	-0.25581
NonTargeting_Human_0619	1	0.37705	0.37711	0.999997	480	0	-0.19682	0.62295	0.62367	0.886524	1360	0	-0.19682
NonTargeting_Human_0876	1	0.37738	0.37742	0.999997	481	0	-0.30597	0.62262	0.62334	0.886524	1359	0	-0.30597
NonTargeting_Human_0058	1	0.37762	0.37768	0.999997	482	0	-0.17446	0.62238	0.62313	0.886524	1358	0	-0.17446
NAA38	15	0.37824	0.69157	0.999997	483	5	0.070317	0.389	0.70912	0.936584	1024	4	0.070317
NonTargeting_Human_0897	1	0.38082	0.38103	0.999997	484	0	-0.18601	0.61918	0.61981	0.883569	1355	0	-0.18601
NonTargeting_Human_0345	1	0.38213	0.38246	0.999997	485	0	-0.22681	0.61787	0.61864	0.882885	1353	0	-0.22681
NonTargeting_Human_0660	1	0.38304	0.38335	0.999997	486	0	-0.19987	0.61696	0.61775	0.882791	1352	0	-0.19987
NonTargeting_Human_0236	1	0.38312	0.38345	0.999997	487	0	-0.25006	0.61688	0.6177	0.882791	1351	0	-0.25006
BST2	15	0.38499	0.69815	0.999997	488	5	0.18006	0.14174	0.40871	0.769962	502	7	0.18006
ERP44	15	0.38695	0.70023	0.999997	489	6	-0.20257	0.62584	0.86905	0.999997	1366	5	-0.20257
NonTargeting_Human_0331	1	0.38705	0.38746	0.999997	490	0	-0.16852	0.61295	0.6136	0.879734	1348	0	-0.16852
GPR152	15	0.38764	0.70101	0.999997	491	5	-0.23578	0.99807	0.99816	0.999997	1689	1	-0.23578
RICTOR	15	0.38906	0.70235	0.999997	492	6	-0.34031	0.57416	0.84086	0.999997	1306	5	-0.34031
NonTargeting_Human_0780	1	0.38984	0.39015	0.999997	493	0	-0.27203	0.61016	0.61094	0.878065	1344	0	-0.27203
DNASE2	15	0.38986	0.70316	0.999997	494	6	-0.19488	0.66694	0.89037	0.999997	1420	5	-0.19488
NonTargeting_Human_0020	1	0.39058	0.39089	0.999997	495	0	-0.12017	0.60942	0.61014	0.87764	1343	0	-0.12017
NonTargeting_Human_0678	1	0.39066	0.391	0.999997	496	0	-0.1983	0.60934	0.61007	0.87764	1342	0	-0.1983
NUDT17	15	0.39092	0.7043	0.999997	497	6	-0.14937	0.99984	0.9999	0.999997	1721	0	-0.14937
FAM156A	15	0.39272	0.70622	0.999997	498	5	0.018108	0.067067	0.24647	0.700273	303	6	0.018108
NonTargeting_Human_0537	1	0.39337	0.39371	0.999997	499	0	-0.16372	0.60663	0.60733	0.875037	1340	0	-0.16372
NonTargeting_Human_0732	1	0.39345	0.39377	0.999997	500	0	-0.23831	0.60655	0.60722	0.875037	1339	0	-0.23831
NonTargeting_Human_0016	1	0.39427	0.3946	0.999997	501	0	-0.15822	0.60573	0.60646	0.875037	1338	0	-0.15822
NonTargeting_Human_0795	1	0.39525	0.39556	0.999997	502	0	-0.18592	0.60475	0.60569	0.874826	1336	0	-0.18592
NonTargeting_Human_0237	1	0.39542	0.39565	0.999997	503	0	-0.31127	0.60458	0.60548	0.874826	1335	0	-0.31127
NonTargeting_Human_0205	1	0.39607	0.39626	0.999997	504	0	-0.12914	0.60393	0.60468	0.874826	1334	0	-0.12914
NonTargeting_Human_0747	1	0.3964	0.39658	0.999997	505	0	-0.17606	0.6036	0.60434	0.874826	1333	0	-0.17606
INTS2	15	0.39724	0.71048	0.999997	506	5	-0.16972	0.19437	0.49027	0.796841	626	5	-0.16972
HDAC3	15	0.39808	0.71107	0.999997	507	5	-0.0048903	0.31822	0.64642	0.899539	887	4	-0.0048903
NonTargeting_Human_0723	1	0.39886	0.39901	0.999997	508	0	-0.19214	0.60114	0.60181	0.873547	1331	0	-0.19214
NonTargeting_Human_0761	1	0.39894	0.39909	0.999997	509	0	-0.15602	0.60106	0.60171	0.873547	1330	0	-0.15602
NonTargeting_Human_0590	1	0.39927	0.3994	0.999997	510	0	-0.19629	0.60073	0.6014	0.873547	1329	0	-0.19629
NonTargeting_Human_0493	1	0.39935	0.39947	0.999997	511	0	-0.2119	0.60065	0.6013	0.873547	1328	0	-0.2119
TM9SF2	15	0.40204	0.71383	0.999997	512	5	0.027819	0.10278	0.32803	0.727123	411	7	0.027819
NonTargeting_Human_0156	1	0.40288	0.40285	0.999997	513	0	-0.19466	0.59712	0.59753	0.872389	1327	0	-0.19466
NonTargeting_Human_0552	1	0.40575	0.40575	0.999997	514	0	-0.26342	0.59425	0.59454	0.869481	1326	0	-0.26342
RPL17	14	0.40747	0.70511	0.999997	515	3	0.096887	0.40377	0.72011	0.943225	1049	6	0.096887
NonTargeting_Human_0386	1	0.40804	0.40817	0.999997	516	0	-0.2343	0.59196	0.59238	0.867048	1324	0	-0.2343
NonTargeting_Human_0137	1	0.40944	0.40965	0.999997	517	0	-0.1109	0.59056	0.59104	0.865894	1322	0	-0.1109
NonTargeting_Human_0697	1	0.40968	0.40989	0.999997	518	0	-0.11776	0.59032	0.59081	0.865894	1321	0	-0.11776
NonTargeting_Human_0453	1	0.41009	0.41034	0.999997	519	0	-0.15332	0.58991	0.59043	0.865894	1320	0	-0.15332
NonTargeting_Human_0542	1	0.41165	0.41174	0.999997	520	0	-0.23374	0.58835	0.58873	0.865311	1319	0	-0.23374
NonTargeting_Human_0001	1	0.41346	0.41361	0.999997	521	0	-0.11918	0.58654	0.58705	0.863568	1317	0	-0.11918
NonTargeting_Human_0949	1	0.41419	0.41427	0.999997	522	0	-0.21002	0.58581	0.58627	0.863146	1315	0	-0.21002
NonTargeting_Human_0081	1	0.41739	0.41751	0.999997	523	0	-0.15106	0.58261	0.58312	0.861407	1314	0	-0.15106
NonTargeting_Human_0406	1	0.42067	0.42086	0.999997	524	0	-0.11584	0.57933	0.57976	0.858204	1312	0	-0.11584
PPIAL4A	15	0.42117	0.72766	0.999997	525	4	0.084706	0.11891	0.36207	0.741689	453	6	0.084706
NonTargeting_Human_0581	1	0.42313	0.42316	0.999997	526	0	-0.11011	0.57687	0.57708	0.856092	1310	0	-0.11011
NonTargeting_Human_0584	1	0.42362	0.42365	0.999997	527	0	-0.18983	0.57638	0.57654	0.85602	1309	0	-0.18983
NonTargeting_Human_0688	1	0.4237	0.42372	0.999997	528	0	-0.11447	0.5763	0.57646	0.85602	1308	0	-0.11447
NonTargeting_Human_0794	1	0.42379	0.4238	0.999997	529	0	-0.17308	0.57621	0.57638	0.85602	1307	0	-0.17308
NonTargeting_Human_0785	1	0.4278	0.42763	0.999997	530	0	-0.099167	0.5722	0.57234	0.852668	1305	0	-0.099167
NonTargeting_Human_0090	1	0.42879	0.42857	0.999997	531	0	-0.090186	0.57121	0.57138	0.852668	1304	0	-0.090186
NonTargeting_Human_0974	1	0.43076	0.43061	0.999997	532	0	-0.15978	0.56924	0.56939	0.850443	1303	0	-0.15978
NonTargeting_Human_0419	1	0.43133	0.43115	0.999997	533	0	-0.15704	0.56867	0.56882	0.850324	1302	0	-0.15704
CCDC178	15	0.43139	0.7349	0.999997	534	3	-0.033769	0.062576	0.23571	0.689777	290	6	-0.033769
NonTargeting_Human_0241	1	0.43149	0.43128	0.999997	535	0	-0.10024	0.56851	0.56865	0.850324	1301	0	-0.10024
NonTargeting_Human_0385	1	0.43297	0.43272	0.999997	536	0	-0.10528	0.56703	0.56716	0.849289	1300	0	-0.10528
NonTargeting_Human_0491	1	0.43518	0.43504	0.999997	537	0	-0.10143	0.56482	0.56497	0.846729	1299	0	-0.10143
NonTargeting_Human_0166	1	0.43617	0.43601	0.999997	538	0	-0.11323	0.56383	0.56393	0.845895	1297	0	-0.11323
HIST2H2BF	15	0.43972	0.74075	0.999997	539	5	-0.020207	0.8509	0.96017	0.999997	1567	4	-0.020207
NonTargeting_Human_0139	1	0.44281	0.44268	0.999997	540	0	-0.091927	0.55719	0.55706	0.83702	1294	0	-0.091927
NonTargeting_Human_0366	1	0.44404	0.44392	0.999997	541	0	-0.071448	0.55596	0.55574	0.836421	1292	0	-0.071448
NonTargeting_Human_0505	1	0.44469	0.44463	0.999997	542	0	-0.084038	0.55531	0.5551	0.836421	1291	0	-0.084038
GZF1	15	0.44565	0.74482	0.999997	543	5	-0.086259	0.9336	0.98191	0.999997	1616	3	-0.086259
NonTargeting_Human_0496	1	0.44584	0.44571	0.999997	544	0	-0.097059	0.55416	0.5538	0.836421	1290	0	-0.097059
DNAL4	15	0.44936	0.74717	0.999997	545	5	0.25952	0.11388	0.35157	0.739553	437	8	0.25952
NonTargeting_Human_0698	1	0.45035	0.45008	0.999997	546	0	-0.064371	0.54965	0.54926	0.831003	1288	0	-0.064371
NonTargeting_Human_0782	1	0.45175	0.45152	0.999997	547	0	-0.069944	0.54825	0.54778	0.82948	1287	0	-0.069944
NonTargeting_Human_0940	1	0.45191	0.45172	0.999997	548	0	-0.079739	0.54809	0.5476	0.82948	1286	0	-0.079739
FURIN	15	0.4522	0.74913	0.999997	549	5	0.084534	0.2215	0.52814	0.81637	689	6	0.084534
NonTargeting_Human_0433	1	0.45363	0.45333	0.999997	550	0	-0.053727	0.54637	0.54604	0.829002	1285	0	-0.053727
NonTargeting_Human_0261	1	0.45552	0.45549	0.999997	551	0	-0.041485	0.54448	0.54389	0.827167	1283	0	-0.041485
NonTargeting_Human_0793	1	0.4556	0.45556	0.999997	552	0	-0.060794	0.5444	0.54379	0.827167	1282	0	-0.060794
NonTargeting_Human_0821	1	0.45839	0.45806	0.999997	553	0	-0.049633	0.54161	0.54096	0.824146	1280	0	-0.049633
NonTargeting_Human_0397	1	0.45863	0.45836	0.999997	554	0	-0.049039	0.54137	0.54074	0.824146	1279	0	-0.049039
NonTargeting_Human_0789	1	0.46077	0.46047	0.999997	555	0	-0.053254	0.53923	0.53848	0.822503	1277	0	-0.053254
NonTargeting_Human_0775	1	0.462	0.46189	0.999997	556	0	-0.040096	0.538	0.53727	0.822089	1274	0	-0.040096
NonTargeting_Human_0006	1	0.46388	0.46395	0.999997	557	0	-0.035456	0.53612	0.53541	0.819969	1273	0	-0.035456
NonTargeting_Human_0649	1	0.46487	0.46486	0.999997	558	0	-0.041814	0.53513	0.5344	0.819136	1272	0	-0.041814
SNX1	15	0.46737	0.75948	0.999997	559	4	0.30929	0.098693	0.31923	0.725062	401	8	0.30929
NonTargeting_Human_0134	1	0.46798	0.46775	0.999997	560	0	-0.020185	0.53202	0.53151	0.816853	1270	0	-0.020185
NonTargeting_Human_0325	1	0.4702	0.47001	0.999997	561	0	-0.029991	0.5298	0.52942	0.81637	1268	0	-0.029991
NonTargeting_Human_0633	1	0.47052	0.47029	0.999997	562	0	-0.030347	0.52948	0.52907	0.81637	1267	0	-0.030347
ZBTB17	15	0.47085	0.76198	0.999997	563	3	-0.03337	0.68228	0.89813	0.999997	1434	4	-0.03337
NonTargeting_Human_0427	1	0.47143	0.4713	0.999997	564	0	-0.023271	0.52857	0.52799	0.81637	1266	0	-0.023271
EBP	15	0.47145	0.76241	0.999997	565	5	0.19248	0.22394	0.53149	0.816853	698	7	0.19248
NonTargeting_Human_0440	1	0.47151	0.47135	0.999997	566	0	-0.028639	0.52849	0.52794	0.81637	1265	0	-0.028639
NonTargeting_Human_0609	1	0.4729	0.4728	0.999997	567	0	-0.018608	0.5271	0.52677	0.81637	1264	0	-0.018608
NonTargeting_Human_0867	1	0.47429	0.47409	0.999997	568	0	-0.0219	0.52571	0.52546	0.815411	1263	0	-0.0219
NonTargeting_Human_0359	1	0.47528	0.47517	0.999997	569	0	-0.023008	0.52472	0.52457	0.814756	1261	0	-0.023008
NonTargeting_Human_0079	1	0.47544	0.4753	0.999997	570	0	-0.01666	0.52456	0.52446	0.814756	1260	0	-0.01666
NonTargeting_Human_0362	1	0.47585	0.47566	0.999997	571	0	-0.021968	0.52415	0.52405	0.814756	1258	0	-0.021968
NonTargeting_Human_0916	1	0.47667	0.47657	0.999997	572	0	-0.015659	0.52333	0.52314	0.814711	1257	0	-0.015659
RBM14	15	0.47713	0.76649	0.999997	573	4	0.19515	0.096956	0.31522	0.724023	391	6	0.19515
NonTargeting_Human_0950	1	0.47716	0.47704	0.999997	574	0	-0.01702	0.52284	0.52257	0.814537	1256	0	-0.01702
NonTargeting_Human_0458	1	0.47725	0.47711	0.999997	575	0	-0.01629	0.52275	0.52254	0.814537	1255	0	-0.01629
NonTargeting_Human_0483	1	0.47946	0.47923	0.999997	576	0	-0.016577	0.52054	0.52013	0.812865	1253	0	-0.016577
NonTargeting_Human_0687	1	0.47995	0.47981	0.999997	577	0	-0.0079829	0.52005	0.51964	0.812858	1252	0	-0.0079829
NonTargeting_Human_0358	1	0.48044	0.4802	0.999997	578	0	-0.0086787	0.51956	0.51908	0.812717	1251	0	-0.0086787
ARGLU1	15	0.48217	0.77006	0.999997	579	5	-0.1273	0.59092	0.85034	0.999997	1323	2	-0.1273
NonTargeting_Human_0039	1	0.48422	0.48395	0.999997	580	0	-0.0042721	0.51578	0.51543	0.809162	1249	0	-0.0042721
NonTargeting_Human_0292	1	0.48438	0.48413	0.999997	581	0	-0.0051506	0.51562	0.51528	0.809162	1248	0	-0.0051506
NonTargeting_Human_0725	1	0.48471	0.48456	0.999997	582	0	-0.0039711	0.51529	0.51495	0.809162	1247	0	-0.0039711
NonTargeting_Human_0962	1	0.48479	0.48464	0.999997	583	0	-0.0032479	0.51521	0.51486	0.809162	1246	0	-0.0032479
SPNS1	15	0.48537	0.77228	0.999997	584	5	-0.11024	0.6153	0.86367	0.999997	1350	4	-0.11024
NonTargeting_Human_0125	1	0.48569	0.48556	0.999997	585	0	-0.0010428	0.51431	0.51401	0.809162	1245	0	-0.0010428
NonTargeting_Human_0510	1	0.48676	0.48655	0.999997	586	0	0.00073618	0.51324	0.51291	0.808838	1244	0	0.00073618
NonTargeting_Human_0805	1	0.48709	0.4869	0.999997	587	0	0.00086256	0.51291	0.51263	0.808838	1243	0	0.00086256
NonTargeting_Human_0213	1	0.48758	0.48751	0.999997	588	0	0.0012983	0.51242	0.51215	0.808838	1242	0	0.0012983
NonTargeting_Human_0708	1	0.48766	0.48755	0.999997	589	0	0.0024185	0.51234	0.51207	0.808838	1241	0	0.0024185
NonTargeting_Human_0389	1	0.48774	0.48767	0.999997	590	0	0.0033771	0.51226	0.512	0.808838	1240	0	0.0033771
NonTargeting_Human_0121	1	0.4884	0.48825	0.999997	591	0	0.003084	0.5116	0.51142	0.808838	1239	0	0.003084
NonTargeting_Human_0823	1	0.48889	0.48876	0.999997	592	0	0.0035739	0.51111	0.51086	0.808838	1238	0	0.0035739
NonTargeting_Human_0380	1	0.4893	0.48904	0.999997	593	0	0.0067864	0.5107	0.51048	0.808838	1237	0	0.0067864
NonTargeting_Human_0354	1	0.49086	0.49067	0.999997	594	0	0.0066144	0.50914	0.50894	0.808838	1234	0	0.0066144
NonTargeting_Human_0416	1	0.4916	0.49133	0.999997	595	0	0.0074392	0.5084	0.5082	0.808838	1230	0	0.0074392
NonTargeting_Human_0956	1	0.49217	0.49193	0.999997	596	0	0.0096358	0.50783	0.50755	0.808838	1229	0	0.0096358
NonTargeting_Human_0092	1	0.49225	0.49201	0.999997	597	0	0.012296	0.50775	0.50747	0.808838	1228	0	0.012296
SEZ6L2	15	0.4923	0.77721	0.999997	598	5	0.06774	0.91655	0.97723	0.999997	1610	3	0.06774
PKD1	15	0.49263	0.77745	0.999997	599	4	0.20982	0.099059	0.31999	0.725251	402	8	0.20982
NonTargeting_Human_0524	1	0.49332	0.49301	0.999997	600	0	0.011239	0.50668	0.5064	0.808838	1225	0	0.011239
WDR13	15	0.49389	0.77827	0.999997	601	5	-0.058371	0.61089	0.86134	0.999997	1347	5	-0.058371
NonTargeting_Human_0407	1	0.49414	0.49387	0.999997	602	0	0.014785	0.50586	0.5056	0.808838	1224	0	0.014785
HIST1H2BB	15	0.49466	0.77887	0.999997	603	1	0.76976	0.0053316	0.033503	0.413366	96	9	0.76976
NonTargeting_Human_0218	1	0.49627	0.49603	0.999997	604	0	0.013283	0.50373	0.5035	0.806329	1223	0	0.013283
NonTargeting_Human_0449	1	0.49643	0.49621	0.999997	605	0	0.014858	0.50357	0.50333	0.806329	1221	0	0.014858
NonTargeting_Human_0832	1	0.4975	0.49731	0.999997	606	0	0.014695	0.5025	0.5024	0.806047	1220	0	0.014695
FAM219B	15	0.4996	0.78221	0.999997	607	5	0.051062	0.32695	0.65441	0.903491	901	6	0.051062
NonTargeting_Human_0878	1	0.49971	0.49956	0.999997	608	0	0.026589	0.50029	0.50005	0.80301	1218	0	0.026589
NonTargeting_Human_0202	1	0.50004	0.49986	0.999997	609	0	0.019683	0.49996	0.49977	0.80301	1217	0	0.019683
NonTargeting_Human_0469	1	0.50029	0.50005	0.999997	610	0	0.016234	0.49971	0.49956	0.80301	1215	0	0.016234
NonTargeting_Human_0743	1	0.50201	0.50188	0.999997	611	0	0.018495	0.49799	0.49773	0.802222	1212	0	0.018495
NonTargeting_Human_0630	1	0.50258	0.50247	0.999997	612	0	0.023376	0.49742	0.49723	0.802158	1211	0	0.023376
GPR52	15	0.50392	0.7851	0.999997	613	4	0.20154	0.08894	0.29717	0.719128	364	6	0.20154
RALA	15	0.5054	0.78616	0.999997	614	4	0.12421	0.051605	0.20423	0.675055	256	6	0.12421
NonTargeting_Human_0548	1	0.50676	0.50652	0.999997	615	0	0.031963	0.49324	0.49295	0.797459	1206	0	0.031963
NonTargeting_Human_0978	1	0.50726	0.50695	0.999997	616	0	0.053642	0.49274	0.49256	0.797459	1205	0	0.053642
NonTargeting_Human_0506	1	0.50742	0.50713	0.999997	617	0	0.045515	0.49258	0.49235	0.797459	1204	0	0.045515
NonTargeting_Human_0274	1	0.50808	0.50782	0.999997	618	0	0.035774	0.49192	0.49165	0.797459	1202	0	0.035774
SLC4A1AP	15	0.50886	0.78861	0.999997	619	5	0.23119	0.36174	0.68539	0.920864	976	6	0.23119
NonTargeting_Human_0634	1	0.50955	0.50932	0.999997	620	0	0.034054	0.49045	0.4902	0.796841	1199	0	0.034054
DDX52	15	0.51051	0.7897	0.999997	621	5	0.23201	0.11598	0.35597	0.739759	443	7	0.23201
ST6GAL1	15	0.51068	0.78978	0.999997	622	3	0.22085	0.28586	0.61263	0.879734	817	7	0.22085
NonTargeting_Human_0695	1	0.5107	0.51048	0.999997	623	0	0.041674	0.4893	0.48904	0.796841	1198	0	0.041674
NonTargeting_Human_0520	1	0.51136	0.51114	0.999997	624	0	0.044253	0.48864	0.48849	0.796841	1197	0	0.044253
NELFA	15	0.51246	0.7911	0.999997	625	5	0.083274	0.68408	0.89912	0.999997	1436	5	0.083274
NonTargeting_Human_0158	1	0.51382	0.51351	0.999997	626	0	0.034239	0.48618	0.486	0.793551	1195	0	0.034239
NonTargeting_Human_0462	1	0.51398	0.51366	0.999997	627	0	0.050087	0.48602	0.48583	0.793551	1194	0	0.050087
NonTargeting_Human_0294	1	0.51455	0.51423	0.999997	628	0	0.067187	0.48545	0.48527	0.793551	1193	0	0.067187
NonTargeting_Human_0454	1	0.51472	0.51431	0.999997	629	0	0.044652	0.48528	0.48517	0.793551	1192	0	0.044652
NonTargeting_Human_0038	1	0.51488	0.51446	0.999997	630	0	0.040713	0.48512	0.48502	0.793551	1191	0	0.040713
NonTargeting_Human_0768	1	0.51546	0.51513	0.999997	631	0	0.05496	0.48454	0.48435	0.793551	1190	0	0.05496
NonTargeting_Human_0066	1	0.51562	0.51528	0.999997	632	0	0.038212	0.48438	0.48413	0.793551	1189	0	0.038212
MORC3	15	0.5157	0.79319	0.999997	633	4	0.11862	0.41024	0.7277	0.949941	1058	6	0.11862
NonTargeting_Human_0868	1	0.5171	0.51667	0.999997	634	0	0.067111	0.4829	0.48264	0.793551	1188	0	0.067111
RHOT2	15	0.51943	0.79587	0.999997	635	5	0.18181	0.26899	0.5911	0.865894	787	7	0.18181
NonTargeting_Human_0877	1	0.51964	0.51918	0.999997	636	0	0.052926	0.48036	0.4801	0.790548	1185	0	0.052926
NonTargeting_Human_0891	1	0.5198	0.51934	0.999997	637	0	0.042557	0.4802	0.48001	0.790548	1184	0	0.042557
NonTargeting_Human_0682	1	0.52013	0.51971	0.999997	638	0	0.077848	0.47987	0.4797	0.790548	1183	0	0.077848
NonTargeting_Human_0216	1	0.5221	0.52186	0.999997	639	0	0.10522	0.4779	0.47773	0.788864	1182	0	0.10522
NDNL2	15	0.5222	0.7976	0.999997	640	5	0.031456	0.41404	0.73089	0.949941	1067	4	0.031456
NonTargeting_Human_0538	1	0.52415	0.52405	0.999997	641	0	0.16827	0.47585	0.47566	0.787344	1181	0	0.16827
NonTargeting_Human_0025	1	0.52579	0.52552	0.999997	642	0	0.075128	0.47421	0.47404	0.786477	1179	0	0.075128
RAB28	15	0.52581	0.79991	0.999997	643	5	0.12842	0.29749	0.62665	0.88881	847	7	0.12842
NonTargeting_Human_0982	1	0.52653	0.52626	0.999997	644	0	0.11029	0.47347	0.47329	0.786477	1178	0	0.11029
NonTargeting_Human_0613	1	0.52767	0.5272	0.999997	645	0	0.14467	0.47233	0.47223	0.786446	1177	0	0.14467
NonTargeting_Human_0659	1	0.52825	0.52769	0.999997	646	0	0.073511	0.47175	0.47163	0.786196	1176	0	0.073511
C2orf49	15	0.52858	0.8016	0.999997	647	5	-0.11825	0.15692	0.43486	0.77796	537	4	-0.11825
NonTargeting_Human_0363	1	0.52882	0.5283	0.999997	648	0	0.081011	0.47118	0.47106	0.786002	1175	0	0.081011
INSR	15	0.52928	0.80208	0.999997	649	3	0.054228	0.68238	0.89817	0.999997	1435	3	0.054228
NonTargeting_Human_0758	1	0.52964	0.52925	0.999997	650	0	0.077192	0.47036	0.47015	0.785232	1174	0	0.077192
NonTargeting_Human_0628	1	0.53062	0.53022	0.999997	651	0	0.056879	0.46938	0.46911	0.784233	1173	0	0.056879
NonTargeting_Human_0627	1	0.53071	0.53029	0.999997	652	0	0.089063	0.46929	0.46901	0.784233	1172	0	0.089063
HMOX2	15	0.53091	0.80325	0.999997	653	4	0.13139	0.040156	0.16922	0.650958	236	5	0.13139
NonTargeting_Human_0757	1	0.53103	0.53053	0.999997	654	0	0.069924	0.46897	0.46867	0.784233	1171	0	0.069924
NonTargeting_Human_0513	1	0.53153	0.53103	0.999997	655	0	0.078774	0.46847	0.46825	0.784233	1169	0	0.078774
PACRGL	15	0.53172	0.80379	0.999997	656	3	0.25502	0.17563	0.46322	0.784233	578	7	0.25502
NonTargeting_Human_0994	1	0.53177	0.53129	0.999997	657	0	0.079125	0.46823	0.46801	0.784233	1168	0	0.079125
NonTargeting_Human_0967	1	0.53218	0.53168	0.999997	658	0	0.098132	0.46782	0.46754	0.784233	1167	0	0.098132
NonTargeting_Human_0587	1	0.533	0.53236	0.999997	659	0	0.05991	0.467	0.46678	0.784233	1165	0	0.05991
NonTargeting_Human_0319	1	0.53308	0.53244	0.999997	660	0	0.073355	0.46692	0.46668	0.784233	1164	0	0.073355
NonTargeting_Human_0907	1	0.53341	0.53273	0.999997	661	0	0.096199	0.46659	0.46639	0.784233	1163	0	0.096199
NonTargeting_Human_0908	1	0.53374	0.53305	0.999997	662	0	0.11946	0.46626	0.4661	0.784233	1162	0	0.11946
NonTargeting_Human_0915	1	0.53407	0.53334	0.999997	663	0	0.075776	0.46593	0.46583	0.784233	1161	0	0.075776
NonTargeting_Human_0133	1	0.53431	0.53358	0.999997	664	0	0.079197	0.46569	0.46564	0.784233	1160	0	0.079197
NonTargeting_Human_0578	1	0.53505	0.53436	0.999997	665	0	0.09471	0.46495	0.46498	0.784233	1159	0	0.09471
NonTargeting_Human_0902	1	0.53522	0.53448	0.999997	666	0	0.077823	0.46478	0.46477	0.784233	1158	0	0.077823
NonTargeting_Human_0259	1	0.53571	0.53505	0.999997	667	0	0.076822	0.46429	0.46434	0.784233	1157	0	0.076822
NonTargeting_Human_0015	1	0.53792	0.53718	0.999997	668	0	0.064003	0.46208	0.46198	0.784233	1156	0	0.064003
NonTargeting_Human_0728	1	0.53817	0.53741	0.999997	669	0	0.077066	0.46183	0.46169	0.784233	1155	0	0.077066
NonTargeting_Human_0719	1	0.53874	0.53796	0.999997	670	0	0.067735	0.46126	0.4609	0.784233	1153	0	0.067735
NonTargeting_Human_0221	1	0.53907	0.5383	0.999997	671	0	0.17152	0.46093	0.46065	0.784233	1152	0	0.17152
NonTargeting_Human_0862	1	0.53915	0.53838	0.999997	672	0	0.09127	0.46085	0.46055	0.784233	1151	0	0.09127
ZNF124	15	0.53916	0.80895	0.999997	673	4	0.10235	0.15956	0.43887	0.778235	544	7	0.10235
NonTargeting_Human_0971	1	0.5394	0.53862	0.999997	674	0	0.091303	0.4606	0.46035	0.784233	1150	0	0.091303
NonTargeting_Human_0973	1	0.53989	0.53917	0.999997	675	0	0.19022	0.46011	0.45992	0.784233	1148	0	0.19022
NonTargeting_Human_0626	1	0.5412	0.54056	0.999997	676	0	0.0824	0.4588	0.45855	0.784233	1146	0	0.0824
NonTargeting_Human_0251	1	0.54137	0.54074	0.999997	677	0	0.066426	0.45863	0.45836	0.784233	1145	0	0.066426
NonTargeting_Human_0648	1	0.54178	0.54113	0.999997	678	0	0.084972	0.45822	0.45791	0.784233	1144	0	0.084972
NonTargeting_Human_0047	1	0.54194	0.54127	0.999997	679	0	0.09859	0.45806	0.45777	0.784233	1143	0	0.09859
NonTargeting_Human_0269	1	0.54202	0.54135	0.999997	680	0	0.058898	0.45798	0.45771	0.784233	1142	0	0.058898
NonTargeting_Human_0479	1	0.54219	0.54154	0.999997	681	0	0.11453	0.45781	0.45758	0.784233	1141	0	0.11453
NonTargeting_Human_0307	1	0.54284	0.5422	0.999997	682	0	0.1122	0.45716	0.45695	0.784233	1139	0	0.1122
NonTargeting_Human_0193	1	0.54301	0.54235	0.999997	683	0	0.094571	0.45699	0.45682	0.784233	1138	0	0.094571
NonTargeting_Human_0084	1	0.54383	0.54318	0.999997	684	0	0.085717	0.45617	0.45606	0.784233	1137	0	0.085717
KLC2	15	0.54545	0.81314	0.999997	685	4	-0.071142	0.48048	0.78523	0.984773	1186	5	-0.071142
NonTargeting_Human_0083	1	0.54563	0.54522	0.999997	686	0	0.076967	0.45437	0.45418	0.784233	1135	0	0.076967
NonTargeting_Human_0353	1	0.54784	0.54735	0.999997	687	0	0.20366	0.45216	0.45194	0.783967	1132	0	0.20366
NonTargeting_Human_0843	1	0.5485	0.54804	0.999997	688	0	0.094574	0.4515	0.45124	0.783967	1131	0	0.094574
NonTargeting_Human_0228	1	0.54916	0.54871	0.999997	689	0	0.082904	0.45084	0.45048	0.783756	1130	0	0.082904
NonTargeting_Human_0169	1	0.54924	0.5488	0.999997	690	0	0.16771	0.45076	0.45041	0.783756	1129	0	0.16771
NonTargeting_Human_0519	1	0.54998	0.54962	0.999997	691	0	0.080781	0.45002	0.44978	0.783756	1128	0	0.080781
NonTargeting_Human_0582	1	0.55063	0.55025	0.999997	692	0	0.13663	0.44937	0.44918	0.783756	1127	0	0.13663
NonTargeting_Human_0572	1	0.55071	0.55033	0.999997	693	0	0.091999	0.44929	0.44909	0.783756	1125	0	0.091999
NonTargeting_Human_0550	1	0.55334	0.55297	0.999997	694	0	0.13965	0.44666	0.44655	0.78079	1122	0	0.13965
NonTargeting_Human_0255	1	0.55358	0.55319	0.999997	695	0	0.10302	0.44642	0.44623	0.78079	1121	0	0.10302
NonTargeting_Human_0992	1	0.55547	0.55524	0.999997	696	0	0.22419	0.44453	0.44445	0.778678	1120	0	0.22419
NonTargeting_Human_0150	1	0.55571	0.55548	0.999997	697	0	0.091277	0.44429	0.44421	0.778678	1119	0	0.091277
NonTargeting_Human_0662	1	0.5567	0.55649	0.999997	698	0	0.10969	0.4433	0.4432	0.778678	1117	0	0.10969
PGA3	15	0.55685	0.82038	0.999997	699	5	-0.054947	0.3594	0.68344	0.920682	970	6	-0.054947
NonTargeting_Human_0499	1	0.55793	0.55782	0.999997	700	0	0.10603	0.44207	0.44185	0.778392	1115	0	0.10603
NonTargeting_Human_0614	1	0.5585	0.55839	0.999997	701	0	0.11003	0.4415	0.44121	0.778392	1114	0	0.11003
NonTargeting_Human_0052	1	0.55883	0.5587	0.999997	702	0	0.11328	0.44117	0.44085	0.778392	1113	0	0.11328
hsa-mir-6515	13	0.55905	0.80676	0.999997	703	3	-0.012927	0.35847	0.67133	0.91543	963	5	-0.012927
NonTargeting_Human_0147	1	0.55981	0.55967	0.999997	704	0	0.24874	0.44019	0.43991	0.778392	1112	0	0.24874
NonTargeting_Human_0225	1	0.56154	0.56148	0.999997	705	0	0.12709	0.43846	0.43827	0.77796	1110	0	0.12709
NonTargeting_Human_0706	1	0.56211	0.56213	0.999997	706	0	0.12483	0.43789	0.43771	0.77796	1109	0	0.12483
NonTargeting_Human_0997	1	0.56227	0.5623	0.999997	707	0	0.21339	0.43773	0.43759	0.77796	1108	0	0.21339
NonTargeting_Human_0195	1	0.56268	0.56274	0.999997	708	0	0.12372	0.43732	0.43714	0.77796	1107	0	0.12372
NonTargeting_Human_0187	1	0.56293	0.563	0.999997	709	0	0.17552	0.43707	0.43687	0.77796	1106	0	0.17552
NonTargeting_Human_0245	1	0.56301	0.56307	0.999997	710	0	0.11297	0.43699	0.43679	0.77796	1105	0	0.11297
NonTargeting_Human_0474	1	0.56309	0.56317	0.999997	711	0	0.13766	0.43691	0.43668	0.77796	1104	0	0.13766
NonTargeting_Human_0700	1	0.56318	0.56326	0.999997	712	0	0.14446	0.43682	0.43659	0.77796	1103	0	0.14446
NonTargeting_Human_0839	1	0.56424	0.56436	0.999997	713	0	0.14672	0.43576	0.43563	0.77796	1102	0	0.14672
NonTargeting_Human_0457	1	0.56449	0.56464	0.999997	714	0	0.14677	0.43551	0.43538	0.77796	1101	0	0.14677
ALG13	15	0.56451	0.82548	0.999997	715	4	0.26182	0.056815	0.22016	0.680057	272	9	0.26182
NonTargeting_Human_0196	1	0.5658	0.56594	0.999997	716	0	0.12047	0.4342	0.43398	0.77796	1099	0	0.12047
NonTargeting_Human_0872	1	0.56605	0.56621	0.999997	717	0	0.10716	0.43395	0.43372	0.77796	1098	0	0.10716
NonTargeting_Human_0410	1	0.56662	0.56679	0.999997	718	0	0.20485	0.43338	0.43317	0.77796	1097	0	0.20485
RPS8	15	0.56677	0.82699	0.999997	719	3	0.01648	0.12668	0.37836	0.753805	467	7	0.01648
NonTargeting_Human_0297	1	0.56842	0.56858	0.999997	720	0	0.086994	0.43158	0.43135	0.77796	1096	0	0.086994
NonTargeting_Human_0171	1	0.56998	0.57017	0.999997	721	0	0.10556	0.43002	0.42981	0.777918	1095	0	0.10556
NonTargeting_Human_0268	1	0.57006	0.57024	0.999997	722	0	0.17384	0.42994	0.42972	0.777918	1094	0	0.17384
NonTargeting_Human_0350	1	0.57023	0.57044	0.999997	723	0	0.13752	0.42977	0.42954	0.777918	1093	0	0.13752
NonTargeting_Human_0549	1	0.57047	0.57065	0.999997	724	0	0.18305	0.42953	0.42933	0.777918	1092	0	0.18305
NonTargeting_Human_0005	1	0.57097	0.57114	0.999997	725	0	0.098546	0.42903	0.42882	0.777918	1091	0	0.098546
NonTargeting_Human_0965	1	0.5722	0.57234	0.999997	726	0	0.1795	0.4278	0.42763	0.777918	1090	0	0.1795
NonTargeting_Human_0044	1	0.57326	0.5735	0.999997	727	0	0.103	0.42674	0.42663	0.776976	1089	0	0.103
NonTargeting_Human_0298	1	0.57425	0.57446	0.999997	728	0	0.15656	0.42575	0.42564	0.775991	1088	0	0.15656
NonTargeting_Human_0616	1	0.57597	0.57612	0.999997	729	0	0.19897	0.42403	0.42406	0.773902	1086	0	0.19897
NonTargeting_Human_0623	1	0.57613	0.57631	0.999997	730	0	0.12008	0.42387	0.42388	0.773902	1085	0	0.12008
CMAS	15	0.57696	0.83383	0.999997	731	4	-0.0085513	0.18284	0.47396	0.786477	596	6	-0.0085513
NonTargeting_Human_0912	1	0.57728	0.57756	0.999997	732	0	0.14464	0.42272	0.42281	0.773902	1084	0	0.14464
NonTargeting_Human_0096	1	0.57851	0.57887	0.999997	733	0	0.17654	0.42149	0.42163	0.772697	1082	0	0.17654
NonTargeting_Human_0557	1	0.57941	0.57985	0.999997	734	0	0.12433	0.42059	0.42077	0.77192	1080	0	0.12433
NonTargeting_Human_0118	1	0.57958	0.58008	0.999997	735	0	0.15257	0.42042	0.42062	0.77192	1079	0	0.15257
NonTargeting_Human_0507	1	0.57994	0.58051	0.999997	736	0	0.16492	0.42006	0.42029	0.77192	1078	0	0.16492
NonTargeting_Human_0003	1	0.58031	0.58083	0.999997	737	0	0.21411	0.41969	0.41994	0.77192	1077	0	0.21411
NonTargeting_Human_0264	1	0.58195	0.58245	0.999997	738	0	0.18558	0.41805	0.4182	0.77192	1074	0	0.18558
RAB13	15	0.58307	0.83778	0.999997	739	3	0.055978	0.58716	0.84805	0.999997	1318	4	0.055978
NonTargeting_Human_0763	1	0.58335	0.58388	0.999997	740	0	0.20959	0.41665	0.41671	0.771007	1071	0	0.20959
NonTargeting_Human_0257	1	0.58408	0.58448	0.999997	741	0	0.37246	0.41592	0.41603	0.771007	1070	0	0.37246
SLC35B2	15	0.58432	0.83868	0.999997	742	5	0.0017264	0.97797	0.99259	0.999997	1660	2	0.0017264
NonTargeting_Human_0056	1	0.58499	0.58542	0.999997	743	0	0.1284	0.41501	0.41507	0.771007	1069	0	0.1284
NonTargeting_Human_0231	1	0.58515	0.5856	0.999997	744	0	0.1103	0.41485	0.41492	0.771007	1068	0	0.1103
CDK12	15	0.58618	0.84005	0.999997	745	5	0.24266	0.093786	0.30821	0.722595	376	8	0.24266
NonTargeting_Human_0247	1	0.5863	0.58681	0.999997	746	0	0.17566	0.4137	0.41383	0.771007	1066	0	0.17566
NonTargeting_Human_0773	1	0.58638	0.58687	0.999997	747	0	0.21026	0.41362	0.41374	0.771007	1065	0	0.21026
NonTargeting_Human_0192	1	0.58654	0.58705	0.999997	748	0	0.15904	0.41346	0.41361	0.771007	1064	0	0.15904
NonTargeting_Human_0244	1	0.58818	0.58858	0.999997	749	0	0.14948	0.41182	0.41188	0.770127	1063	0	0.14948
ZNF263	15	0.58834	0.84152	0.999997	750	4	-0.11264	0.85117	0.96027	0.999997	1569	4	-0.11264
MED27	15	0.58884	0.84189	0.999997	751	5	-0.1859	0.46045	0.76902	0.969909	1149	4	-0.1859
NonTargeting_Human_0679	1	0.589	0.58945	0.999997	752	0	0.17783	0.411	0.41119	0.770127	1062	0	0.17783
NonTargeting_Human_0302	1	0.58941	0.58986	0.999997	753	0	0.12059	0.41059	0.41084	0.770127	1061	0	0.12059
NonTargeting_Human_0143	1	0.5895	0.58996	0.999997	754	0	0.41866	0.4105	0.41075	0.770127	1060	0	0.41866
NonTargeting_Human_0592	1	0.58974	0.59025	0.999997	755	0	0.11058	0.41026	0.4105	0.770127	1059	0	0.11058
NonTargeting_Human_0941	1	0.59212	0.59253	0.999997	756	0	0.22183	0.40788	0.40802	0.769962	1057	0	0.22183
MAP1S	15	0.59247	0.84439	0.999997	757	4	0.098327	0.45741	0.76671	0.969879	1140	6	0.098327
NonTargeting_Human_0377	1	0.59278	0.59325	0.999997	758	0	0.19551	0.40722	0.40731	0.769962	1056	0	0.19551
NonTargeting_Human_0576	1	0.59335	0.59371	0.999997	759	0	0.4516	0.40665	0.40667	0.769962	1054	0	0.4516
DET1	15	0.5941	0.84547	0.999997	760	3	-0.080649	0.94575	0.98516	0.999997	1631	2	-0.080649
NonTargeting_Human_0625	1	0.59458	0.59496	0.999997	761	0	0.2617	0.40542	0.4054	0.769504	1052	0	0.2617
NonTargeting_Human_0620	1	0.59499	0.59537	0.999997	762	0	0.36735	0.40501	0.40492	0.769437	1051	0	0.36735
NonTargeting_Human_0235	1	0.59581	0.59614	0.999997	763	0	0.13214	0.40419	0.40402	0.768552	1050	0	0.13214
NonTargeting_Human_0556	1	0.5963	0.59668	0.999997	764	0	0.18535	0.4037	0.40363	0.768552	1048	0	0.18535
TPP2	15	0.59703	0.84718	0.999997	765	5	0.015881	0.60667	0.85895	0.999997	1341	4	0.015881
NonTargeting_Human_0841	1	0.59753	0.59797	0.999997	766	0	0.23637	0.40247	0.40251	0.767348	1047	0	0.23637
CCZ1	15	0.59756	0.84754	0.999997	767	5	-0.090331	0.44427	0.75607	0.966488	1118	6	-0.090331
NCAPG2	15	0.59775	0.84772	0.999997	768	4	-0.035285	0.057672	0.22262	0.681484	275	6	-0.035285
DGKK	15	0.59782	0.8478	0.999997	769	5	0.10165	0.45378	0.76358	0.968212	1133	5	0.10165
NonTargeting_Human_0911	1	0.59827	0.59872	0.999997	770	0	0.37824	0.40173	0.40182	0.766868	1045	0	0.37824
S100A14	15	0.59861	0.84832	0.999997	771	5	-0.17726	0.16058	0.44051	0.778392	545	3	-0.17726
NonTargeting_Human_0375	1	0.59868	0.59907	0.999997	772	0	0.18699	0.40132	0.40143	0.766868	1043	0	0.18699
RPS14	15	0.59884	0.84842	0.999997	773	2	0.25549	0.011621	0.063885	0.511076	131	7	0.25549
NonTargeting_Human_0798	1	0.59934	0.5998	0.999997	774	0	0.1593	0.40066	0.40072	0.766435	1042	0	0.1593
NonTargeting_Human_0185	1	0.60122	0.60191	0.999997	775	0	0.18085	0.39878	0.39897	0.763929	1041	0	0.18085
NonTargeting_Human_0485	1	0.60237	0.60303	0.999997	776	0	0.25098	0.39763	0.39786	0.762642	1040	0	0.25098
NonTargeting_Human_0220	1	0.60245	0.60316	0.999997	777	0	0.14466	0.39755	0.39779	0.762642	1039	0	0.14466
NonTargeting_Human_0355	1	0.60393	0.60468	0.999997	778	0	0.18786	0.39607	0.39626	0.761231	1037	0	0.18786
NonTargeting_Human_0918	1	0.60401	0.60478	0.999997	779	0	0.27242	0.39599	0.39617	0.761231	1036	0	0.27242
NonTargeting_Human_0238	1	0.60434	0.60517	0.999997	780	0	0.26372	0.39566	0.39591	0.761231	1035	0	0.26372
NonTargeting_Human_0964	1	0.60532	0.60611	0.999997	781	0	0.24258	0.39468	0.39495	0.761231	1034	0	0.24258
NonTargeting_Human_0145	1	0.60606	0.60679	0.999997	782	0	0.25482	0.39394	0.3943	0.761231	1032	0	0.25482
NonTargeting_Human_0190	1	0.60631	0.607	0.999997	783	0	0.16342	0.39369	0.39402	0.761231	1031	0	0.16342
NDUFB10	15	0.60636	0.85351	0.999997	784	4	-0.062107	0.45976	0.76845	0.969909	1147	5	-0.062107
hsa-mir-6859-1	14	0.60683	0.84034	0.999997	785	3	0.20516	0.016517	0.082115	0.550352	154	6	0.20516
NonTargeting_Human_0565	1	0.60688	0.60753	0.999997	786	0	0.14354	0.39312	0.39352	0.761231	1030	0	0.14354
NonTargeting_Human_0226	1	0.60704	0.60771	0.999997	787	0	0.15328	0.39296	0.39333	0.761231	1029	0	0.15328
NonTargeting_Human_0152	1	0.6077	0.60842	0.999997	788	0	0.14707	0.3923	0.39273	0.761231	1028	0	0.14707
NonTargeting_Human_0745	1	0.60811	0.60892	0.999997	789	0	0.17399	0.39189	0.39228	0.761231	1027	0	0.17399
NonTargeting_Human_0194	1	0.60885	0.60961	0.999997	790	0	0.21531	0.39115	0.39152	0.761231	1026	0	0.21531
NonTargeting_Human_0501	1	0.61032	0.61105	0.999997	791	0	0.23632	0.38968	0.39002	0.760937	1025	0	0.23632
NonTargeting_Human_0151	1	0.61106	0.61172	0.999997	792	0	0.16763	0.38894	0.38933	0.760439	1023	0	0.16763
NonTargeting_Human_0408	1	0.61155	0.61219	0.999997	793	0	0.21736	0.38845	0.38884	0.760326	1021	0	0.21736
CAPN15	15	0.61226	0.85696	0.999997	794	4	0.097282	0.072828	0.25997	0.700724	321	7	0.097282
NonTargeting_Human_0097	1	0.61327	0.61389	0.999997	795	0	0.16206	0.38673	0.38701	0.757592	1018	0	0.16206
NonTargeting_Human_0477	1	0.61344	0.61405	0.999997	796	0	0.2127	0.38656	0.38684	0.757592	1017	0	0.2127
NonTargeting_Human_0810	1	0.61442	0.61518	0.999997	797	0	0.28469	0.38558	0.38584	0.756993	1016	0	0.28469
NonTargeting_Human_0379	1	0.61467	0.61542	0.999997	798	0	0.17666	0.38533	0.38562	0.756993	1015	0	0.17666
NonTargeting_Human_0167	1	0.61483	0.61556	0.999997	799	0	0.20971	0.38517	0.38549	0.756993	1014	0	0.20971
NonTargeting_Human_0528	1	0.61524	0.61601	0.999997	800	0	0.1696	0.38476	0.38508	0.756993	1013	0	0.1696
NonTargeting_Human_0162	1	0.61532	0.61609	0.999997	801	0	0.2425	0.38468	0.38495	0.756993	1012	0	0.2425
NonTargeting_Human_0232	1	0.6159	0.61676	0.999997	802	0	0.18376	0.3841	0.38442	0.756993	1011	0	0.18376
NonTargeting_Human_0545	1	0.61623	0.6171	0.999997	803	0	0.24672	0.38377	0.3841	0.756993	1010	0	0.24672
NonTargeting_Human_0715	1	0.61688	0.6177	0.999997	804	0	0.24557	0.38312	0.38345	0.756993	1009	0	0.24557
NonTargeting_Human_0486	1	0.61746	0.61818	0.999997	805	0	0.23402	0.38254	0.38297	0.756993	1008	0	0.23402
NonTargeting_Human_0865	1	0.61803	0.61875	0.999997	806	0	0.18414	0.38197	0.3823	0.756993	1007	0	0.18414
NonTargeting_Human_0183	1	0.61877	0.61942	0.999997	807	0	0.16669	0.38123	0.38148	0.756921	1006	0	0.16669
NonTargeting_Human_0450	1	0.62065	0.62128	0.999997	808	0	0.15582	0.37935	0.37948	0.753805	1004	0	0.15582
NonTargeting_Human_0304	1	0.62074	0.62137	0.999997	809	0	0.2057	0.37926	0.37938	0.753805	1003	0	0.2057
NonTargeting_Human_0884	1	0.62229	0.62303	0.999997	810	0	0.25103	0.37771	0.37775	0.753789	1001	0	0.25103
NonTargeting_Human_0452	1	0.62287	0.62356	0.999997	811	0	0.28046	0.37713	0.3772	0.753789	1000	0	0.28046
NonTargeting_Human_0583	1	0.62328	0.62403	0.999997	812	0	0.29484	0.37672	0.37678	0.753789	999	0	0.29484
NonTargeting_Human_0132	1	0.62361	0.6244	0.999997	813	0	0.26458	0.37639	0.37648	0.753789	998	0	0.26458
NonTargeting_Human_0526	1	0.62615	0.62709	0.999997	814	0	0.23809	0.37385	0.37388	0.751198	997	0	0.23809
NDUFV1	15	0.62691	0.86318	0.999997	815	3	-0.091279	0.50698	0.80461	0.993493	1227	4	-0.091279
ATP5F1	15	0.62841	0.86384	0.999997	816	4	-0.092451	0.8239	0.95012	0.999997	1549	4	-0.092451
NonTargeting_Human_0656	1	0.62869	0.62968	0.999997	817	0	0.24337	0.37131	0.37121	0.747542	995	0	0.24337
NonTargeting_Human_0934	1	0.62894	0.62996	0.999997	818	0	0.30746	0.37106	0.37096	0.747542	994	0	0.30746
NonTargeting_Human_0927	1	0.62902	0.63009	0.999997	819	0	0.30367	0.37098	0.37089	0.747542	993	0	0.30367
NonTargeting_Human_0923	1	0.63025	0.63147	0.999997	820	0	0.21179	0.36975	0.36976	0.747194	992	0	0.21179
NonTargeting_Human_0601	1	0.63115	0.6324	0.999997	821	0	0.26891	0.36885	0.36888	0.746284	991	1	0.26891
C1GALT1	15	0.63137	0.86516	0.999997	822	4	0.061831	0.35514	0.67948	0.919306	958	5	0.061831
NonTargeting_Human_0019	1	0.63156	0.63277	0.999997	823	0	0.18496	0.36844	0.36844	0.746243	990	1	0.18496
NonTargeting_Human_0265	1	0.63213	0.63335	0.999997	824	0	0.19239	0.36787	0.36783	0.74588	989	1	0.19239
NonTargeting_Human_0842	1	0.63312	0.63443	0.999997	825	0	0.22617	0.36688	0.36678	0.744611	988	1	0.22617
NonTargeting_Human_0729	1	0.63328	0.63456	0.999997	826	0	0.21949	0.36672	0.36662	0.744611	987	1	0.21949
NonTargeting_Human_0418	1	0.63336	0.63467	0.999997	827	0	0.26968	0.36664	0.36655	0.744611	986	1	0.26968
NonTargeting_Human_0401	1	0.63369	0.63492	0.999997	828	0	0.23096	0.36631	0.36625	0.744611	984	1	0.23096
NonTargeting_Human_0650	1	0.63525	0.63654	0.999997	829	0	0.1536	0.36475	0.36457	0.743571	983	1	0.1536
C2CD4A	15	0.63571	0.86711	0.999997	830	4	0.18233	0.16289	0.44419	0.778678	554	7	0.18233
NonTargeting_Human_0800	1	0.63648	0.63764	0.999997	831	0	0.32147	0.36352	0.36343	0.742107	981	1	0.32147
NonTargeting_Human_0849	1	0.63697	0.63819	0.999997	832	0	0.21336	0.36303	0.36289	0.741864	979	1	0.21336
NonTargeting_Human_0313	1	0.63746	0.63875	0.999997	833	0	0.17237	0.36254	0.36238	0.741689	978	1	0.17237
NonTargeting_Human_0429	1	0.63804	0.63928	0.999997	834	0	0.1986	0.36196	0.36176	0.741689	977	1	0.1986
EPN1	15	0.63832	0.86822	0.999997	835	4	-0.0057272	0.34394	0.6694	0.914105	934	5	-0.0057272
NonTargeting_Human_0095	1	0.63976	0.6411	0.999997	836	0	0.21388	0.36024	0.36017	0.739759	974	1	0.21388
NonTargeting_Human_0409	1	0.63992	0.64126	0.999997	837	0	0.2115	0.36008	0.35999	0.739759	973	1	0.2115
NonTargeting_Human_0925	1	0.64033	0.64161	0.999997	838	0	0.39064	0.35967	0.35964	0.739759	971	1	0.39064
NonTargeting_Human_0439	1	0.64074	0.642	0.999997	839	0	0.12918	0.35926	0.35924	0.739759	969	1	0.12918
NonTargeting_Human_0306	1	0.64091	0.6422	0.999997	840	0	0.18566	0.35909	0.35904	0.739759	968	1	0.18566
NonTargeting_Human_0289	1	0.64099	0.64229	0.999997	841	0	0.29787	0.35901	0.35898	0.739759	967	1	0.29787
NonTargeting_Human_0086	1	0.64107	0.64239	0.999997	842	0	0.19097	0.35893	0.3589	0.739759	966	1	0.19097
NonTargeting_Human_0035	1	0.64132	0.64264	0.999997	843	0	0.22998	0.35868	0.35866	0.739759	965	1	0.22998
NonTargeting_Human_0935	1	0.64361	0.64495	0.999997	844	0	0.24413	0.35639	0.35644	0.739759	962	1	0.24413
NonTargeting_Human_0445	1	0.64386	0.64514	0.999997	845	0	0.36013	0.35614	0.35624	0.739759	961	1	0.36013
NonTargeting_Human_0926	1	0.64394	0.64521	0.999997	846	0	0.59472	0.35606	0.35616	0.739759	960	1	0.59472
NAA60	15	0.64442	0.87088	0.999997	847	4	0.11837	0.74924	0.92421	0.999997	1497	4	0.11837
NonTargeting_Human_0207	1	0.64558	0.64704	0.999997	848	0	0.26648	0.35442	0.35456	0.739759	957	1	0.26648
NonTargeting_Human_0146	1	0.64599	0.64746	0.999997	849	0	0.20059	0.35401	0.35416	0.739759	956	1	0.20059
NonTargeting_Human_0334	1	0.64624	0.6477	0.999997	850	0	0.27532	0.35376	0.35388	0.739759	955	1	0.27532
NonTargeting_Human_0370	1	0.64665	0.64815	0.999997	851	0	0.21846	0.35335	0.35352	0.739759	954	1	0.21846
NonTargeting_Human_0080	1	0.64681	0.6483	0.999997	852	0	0.28249	0.35319	0.35331	0.739759	953	1	0.28249
GYG2	15	0.64761	0.87215	0.999997	853	3	0.10157	0.047643	0.19201	0.670047	249	7	0.10157
CSNK2A2	15	0.64811	0.87237	0.999997	854	2	0.096877	0.27351	0.59678	0.872026	793	7	0.096877
NonTargeting_Human_0285	1	0.64812	0.64965	0.999997	855	0	0.51324	0.35188	0.35205	0.739553	952	1	0.51324
TMEM18	15	0.6482	0.87242	0.999997	856	2	0.15777	0.22488	0.53263	0.817856	701	7	0.15777
NonTargeting_Human_0217	1	0.64845	0.65003	0.999997	857	0	0.27156	0.35155	0.35168	0.739553	951	1	0.27156
NonTargeting_Human_0441	1	0.64886	0.65039	0.999997	858	0	0.39984	0.35114	0.35129	0.739553	950	1	0.39984
BMP15	15	0.64904	0.87277	0.999997	859	4	0.065922	0.43891	0.75188	0.964567	1111	6	0.065922
NonTargeting_Human_0249	1	0.64911	0.65068	0.999997	860	0	0.2192	0.35089	0.35102	0.739553	949	1	0.2192
NonTargeting_Human_0948	1	0.64919	0.65077	0.999997	861	0	0.26943	0.35081	0.35094	0.739553	948	1	0.26943
NonTargeting_Human_0372	1	0.64984	0.65131	0.999997	862	0	0.25953	0.35016	0.35026	0.739553	947	1	0.25953
NonTargeting_Human_0642	1	0.64993	0.65141	0.999997	863	0	0.27162	0.35007	0.35016	0.739553	946	1	0.27162
NonTargeting_Human_0426	1	0.65058	0.65202	0.999997	864	0	0.2723	0.34942	0.34945	0.739553	944	1	0.2723
NonTargeting_Human_0909	1	0.65075	0.65221	0.999997	865	0	0.24216	0.34925	0.34931	0.739553	943	1	0.24216
NonTargeting_Human_0160	1	0.65091	0.65239	0.999997	866	0	0.25431	0.34909	0.3491	0.739553	942	1	0.25431
NonTargeting_Human_0799	1	0.65198	0.65337	0.999997	867	0	0.43501	0.34802	0.34814	0.739553	941	1	0.43501
NonTargeting_Human_0722	1	0.6523	0.65374	0.999997	868	0	0.3213	0.3477	0.34778	0.739553	939	1	0.3213
NonTargeting_Human_0413	1	0.65239	0.65378	0.999997	869	0	0.30638	0.34761	0.34771	0.739553	938	1	0.30638
NonTargeting_Human_0396	1	0.65411	0.65546	0.999997	870	0	0.19379	0.34589	0.34608	0.739553	937	1	0.19379
NonTargeting_Human_0953	1	0.65526	0.65669	0.999997	871	0	0.35712	0.34474	0.3451	0.739433	936	1	0.35712
PES1	15	0.65543	0.87542	0.999997	872	4	-0.043479	0.4208	0.73673	0.953989	1081	4	-0.043479
INPP5J	15	0.65555	0.87549	0.999997	873	2	0.16433	0.26022	0.57997	0.858204	767	6	0.16433
NonTargeting_Human_0050	1	0.65599	0.65742	0.999997	874	0	0.43667	0.34401	0.34434	0.739329	935	1	0.43667
NonTargeting_Human_0597	1	0.65649	0.65799	0.999997	875	0	0.24033	0.34351	0.3439	0.739276	933	1	0.24033
NonTargeting_Human_0061	1	0.65714	0.65855	0.999997	876	0	0.25658	0.34286	0.34315	0.738566	932	1	0.25658
ZBTB44	15	0.6574	0.87621	0.999997	877	4	0.48693	0.0061637	0.037787	0.424378	103	9	0.48693
NonTargeting_Human_0390	1	0.65854	0.6598	0.999997	878	0	0.60949	0.34146	0.34157	0.736077	930	1	0.60949
NonTargeting_Human_0816	1	0.6587	0.65995	0.999997	879	0	0.237	0.3413	0.3414	0.736077	929	1	0.237
NonTargeting_Human_0807	1	0.65886	0.66009	0.999997	880	0	0.28086	0.34114	0.34124	0.736077	927	1	0.28086
NonTargeting_Human_0336	1	0.65927	0.66045	0.999997	881	0	0.33682	0.34073	0.34079	0.736077	926	1	0.33682
CREB5	15	0.65962	0.87709	0.999997	882	1	0.44452	0.01656	0.086088	0.554015	156	9	0.44452
HIST2H3A	15	0.65981	0.87714	0.999997	883	4	-0.01686	0.74729	0.92353	0.999997	1493	4	-0.01686
NonTargeting_Human_0859	1	0.66042	0.66144	0.999997	884	0	0.26916	0.33958	0.33947	0.736074	925	1	0.26916
NonTargeting_Human_0742	1	0.66288	0.66396	0.999997	885	0	0.24808	0.33712	0.337	0.731624	924	1	0.24808
NonTargeting_Human_0040	1	0.66313	0.66418	0.999997	886	0	0.25721	0.33687	0.33676	0.731624	923	1	0.25721
NonTargeting_Human_0702	1	0.6637	0.66477	0.999997	887	0	0.27818	0.3363	0.33609	0.731474	922	1	0.27818
NonTargeting_Human_0142	1	0.66403	0.66512	0.999997	888	0	0.24169	0.33597	0.33571	0.731474	921	1	0.24169
NonTargeting_Human_0694	1	0.66411	0.66515	0.999997	889	0	0.36254	0.33589	0.33561	0.731474	920	1	0.36254
NonTargeting_Human_0672	1	0.66469	0.66568	0.999997	890	0	0.31824	0.33531	0.33503	0.731474	919	1	0.31824
NonTargeting_Human_0736	1	0.66583	0.66681	0.999997	891	0	0.24415	0.33417	0.33377	0.730034	917	1	0.24415
NonTargeting_Human_0638	1	0.66788	0.66905	0.999997	892	0	0.3182	0.33212	0.33163	0.727123	915	1	0.3182
NonTargeting_Human_0647	1	0.66829	0.66942	0.999997	893	0	0.32332	0.33171	0.33123	0.727123	913	1	0.32332
NonTargeting_Human_0704	1	0.66854	0.66964	0.999997	894	0	0.26836	0.33146	0.33099	0.727123	912	1	0.26836
NonTargeting_Human_0337	1	0.6687	0.66982	0.999997	895	0	0.19541	0.3313	0.3308	0.727123	911	1	0.19541
NonTargeting_Human_0472	1	0.66919	0.6703	0.999997	896	0	0.35266	0.33081	0.33036	0.727123	910	1	0.35266
NonTargeting_Human_0533	1	0.66936	0.67041	0.999997	897	0	0.32005	0.33064	0.33019	0.727123	909	1	0.32005
NonTargeting_Human_0928	1	0.66993	0.67095	0.999997	898	0	0.74751	0.33007	0.32967	0.727123	908	1	0.74751
NonTargeting_Human_0683	1	0.67018	0.6712	0.999997	899	0	0.35014	0.32982	0.32941	0.727123	907	1	0.35014
NonTargeting_Human_0568	1	0.67067	0.67166	0.999997	900	0	0.28885	0.32933	0.32888	0.727123	906	1	0.28885
NonTargeting_Human_0754	1	0.67083	0.6718	0.999997	901	0	0.24854	0.32917	0.32871	0.727123	905	1	0.24854
PPP1R8	15	0.67131	0.88213	0.999997	902	4	0.022844	0.14263	0.41037	0.770127	507	5	0.022844
NonTargeting_Human_0615	1	0.67206	0.67294	0.999997	903	0	0.28145	0.32794	0.32754	0.727123	903	1	0.28145
NonTargeting_Human_0599	1	0.67305	0.67383	0.999997	904	0	0.24553	0.32695	0.32645	0.727123	902	1	0.24553
NonTargeting_Human_0082	1	0.67321	0.67396	0.999997	905	0	0.23151	0.32679	0.32632	0.727123	900	1	0.23151
NonTargeting_Human_0740	1	0.67329	0.67405	0.999997	906	0	0.42071	0.32671	0.32626	0.727123	899	1	0.42071
PIGS	15	0.67484	0.88358	0.999997	907	4	0.083259	0.24654	0.56183	0.843472	738	4	0.083259
NonTargeting_Human_0899	1	0.67534	0.67604	0.999997	908	0	0.42979	0.32466	0.32421	0.727123	897	1	0.42979
NonTargeting_Human_0792	1	0.67551	0.67615	0.999997	909	0	0.26553	0.32449	0.32399	0.727123	896	1	0.26553
NonTargeting_Human_0041	1	0.67633	0.67692	0.999997	910	0	0.24545	0.32367	0.32331	0.727123	894	1	0.24545
NonTargeting_Human_0036	1	0.67772	0.67831	0.999997	911	0	0.29491	0.32228	0.32188	0.727123	893	1	0.29491
NonTargeting_Human_0774	1	0.67805	0.67866	0.999997	912	0	0.32179	0.32195	0.3215	0.727123	892	1	0.32179
IBA57	15	0.67894	0.88531	0.999997	913	3	-0.014432	0.36322	0.68674	0.921266	980	5	-0.014432
NonTargeting_Human_0112	1	0.6801	0.68076	0.999997	914	0	0.35175	0.3199	0.31949	0.725062	891	1	0.35175
NonTargeting_Human_0348	1	0.68051	0.68123	0.999997	915	0	0.30994	0.31949	0.31907	0.725062	890	1	0.30994
NonTargeting_Human_0945	1	0.68125	0.68193	0.999997	916	0	0.41372	0.31875	0.31817	0.72489	889	1	0.41372
NonTargeting_Human_0459	1	0.68166	0.68227	0.999997	917	0	0.30377	0.31834	0.31772	0.724803	888	1	0.30377
NonTargeting_Human_0560	1	0.68207	0.68274	0.999997	918	0	0.49356	0.31793	0.31727	0.724803	886	1	0.49356
NonTargeting_Human_0574	1	0.68371	0.6844	0.999997	919	0	0.4914	0.31629	0.31573	0.724023	885	1	0.4914
NonTargeting_Human_0895	1	0.68379	0.68453	0.999997	920	0	0.58444	0.31621	0.31563	0.724023	884	1	0.58444
NonTargeting_Human_0654	1	0.68486	0.68551	0.999997	921	0	0.26633	0.31514	0.31451	0.724023	883	1	0.26633
NonTargeting_Human_0866	1	0.6851	0.68583	0.999997	922	0	0.50886	0.3149	0.31427	0.724023	882	1	0.50886
CNTN6	15	0.68513	0.88784	0.999997	923	4	0.4504	0.042055	0.17515	0.664038	239	9	0.4504
NonTargeting_Human_0772	1	0.68527	0.68603	0.999997	924	0	0.38049	0.31473	0.31414	0.724023	881	1	0.38049
SPATA25	15	0.68531	0.8879	0.999997	925	4	0.16233	0.361	0.68477	0.920864	975	6	0.16233
NonTargeting_Human_0339	1	0.68535	0.68613	0.999997	926	0	0.32835	0.31465	0.31407	0.724023	880	1	0.32835
NonTargeting_Human_0665	1	0.68609	0.68678	0.999997	927	0	0.26762	0.31391	0.31338	0.724023	879	1	0.26762
NonTargeting_Human_0174	1	0.68887	0.68944	0.999997	928	0	0.26265	0.31113	0.31061	0.722595	877	1	0.26265
NonTargeting_Human_0424	1	0.68896	0.68952	0.999997	929	0	0.36707	0.31104	0.31053	0.722595	876	1	0.36707
NonTargeting_Human_0094	1	0.6892	0.68979	0.999997	930	0	0.29125	0.3108	0.31031	0.722595	875	1	0.29125
NonTargeting_Human_0845	1	0.68937	0.68998	0.999997	931	0	0.45039	0.31063	0.31013	0.722595	873	1	0.45039
NonTargeting_Human_0629	1	0.69002	0.69073	0.999997	932	0	0.28997	0.30998	0.30943	0.722595	872	1	0.28997
NonTargeting_Human_0790	1	0.6901	0.69085	0.999997	933	0	0.64212	0.3099	0.30932	0.722595	871	1	0.64212
NonTargeting_Human_0262	1	0.69084	0.69151	0.999997	934	0	0.24721	0.30916	0.30854	0.722595	870	1	0.24721
NonTargeting_Human_0593	1	0.69133	0.692	0.999997	935	0	0.34511	0.30867	0.30808	0.722595	868	1	0.34511
NonTargeting_Human_0275	1	0.69158	0.69223	0.999997	936	0	0.37855	0.30842	0.30785	0.722595	867	1	0.37855
NonTargeting_Human_0222	1	0.69191	0.69258	0.999997	937	0	0.52905	0.30809	0.30759	0.722595	866	1	0.52905
S100A10	15	0.69219	0.89098	0.999997	938	4	0.42507	0.036595	0.15751	0.637585	222	9	0.42507
NonTargeting_Human_0684	1	0.69265	0.6933	0.999997	939	0	0.25476	0.30735	0.30692	0.722595	865	1	0.25476
NonTargeting_Human_0392	1	0.69412	0.69451	0.999997	940	0	0.26359	0.30588	0.30545	0.722595	864	1	0.26359
NonTargeting_Human_0303	1	0.69461	0.69499	0.999997	941	0	0.26438	0.30539	0.30508	0.722595	863	1	0.26438
NonTargeting_Human_0351	1	0.69469	0.69504	0.999997	942	0	0.34263	0.30531	0.30502	0.722595	862	1	0.34263
ZBTB37	15	0.6956	0.89236	0.999997	943	4	0.48905	0.038373	0.16333	0.643333	228	9	0.48905
NonTargeting_Human_0554	1	0.69601	0.69641	0.999997	944	0	0.42394	0.30399	0.30378	0.722148	860	1	0.42394
NonTargeting_Human_0738	1	0.6974	0.6978	0.999997	945	0	0.49025	0.3026	0.30246	0.719981	858	1	0.49025
NonTargeting_Human_0830	1	0.69748	0.6979	0.999997	946	0	0.33133	0.30252	0.30239	0.719981	857	1	0.33133
NonTargeting_Human_0026	1	0.69756	0.69798	0.999997	947	0	0.42089	0.30244	0.30232	0.719981	856	1	0.42089
NonTargeting_Human_0756	1	0.69797	0.69841	0.999997	948	0	0.24505	0.30203	0.30194	0.719981	855	1	0.24505
NonTargeting_Human_0669	1	0.6983	0.69872	0.999997	949	0	0.39401	0.3017	0.30164	0.719981	854	1	0.39401
NonTargeting_Human_0919	1	0.69855	0.699	0.999997	950	0	0.4082	0.30145	0.30142	0.719981	852	1	0.4082
NonTargeting_Human_0989	1	0.6997	0.70008	0.999997	951	0	0.63804	0.3003	0.30016	0.719981	851	1	0.63804
NonTargeting_Human_0632	1	0.69978	0.70016	0.999997	952	0	0.30713	0.30022	0.30008	0.719981	850	1	0.30713
NonTargeting_Human_0889	1	0.70166	0.70211	0.999997	953	0	0.46228	0.29834	0.29833	0.719981	849	1	0.46228
NonTargeting_Human_0943	1	0.70437	0.70485	0.999997	954	0	0.46388	0.29563	0.29562	0.716356	846	1	0.46388
NonTargeting_Human_0920	1	0.70445	0.70492	0.999997	955	0	0.52881	0.29555	0.29549	0.716356	845	1	0.52881
NonTargeting_Human_0271	1	0.70453	0.70499	0.999997	956	0	0.43318	0.29547	0.29539	0.716356	844	1	0.43318
NonTargeting_Human_0085	1	0.7047	0.7051	0.999997	957	0	0.33838	0.2953	0.29521	0.716356	843	1	0.33838
SMNDC1	15	0.7047	0.89626	0.999997	958	4	0.16781	0.66086	0.88709	0.999997	1412	5	0.16781
NonTargeting_Human_0266	1	0.70503	0.70539	0.999997	959	0	0.3979	0.29497	0.29482	0.716356	842	1	0.3979
NonTargeting_Human_0643	1	0.70511	0.70548	0.999997	960	0	0.60455	0.29489	0.29474	0.716356	841	1	0.60455
NonTargeting_Human_0731	1	0.70535	0.70571	0.999997	961	0	0.48033	0.29465	0.29452	0.716356	840	1	0.48033
NonTargeting_Human_0144	1	0.7056	0.70595	0.999997	962	0	0.34459	0.2944	0.29421	0.716356	839	1	0.34459
NonTargeting_Human_0562	1	0.70585	0.70616	0.999997	963	0	0.53502	0.29415	0.29394	0.716356	838	1	0.53502
NonTargeting_Human_0977	1	0.70601	0.70631	0.999997	964	0	0.36441	0.29399	0.29374	0.716356	837	1	0.36441
NonTargeting_Human_0173	1	0.7065	0.70671	0.999997	965	0	0.42821	0.2935	0.29314	0.716356	836	1	0.42821
NonTargeting_Human_0529	1	0.70749	0.70767	0.999997	966	0	0.26007	0.29251	0.29223	0.716356	835	1	0.26007
NonTargeting_Human_0671	1	0.70765	0.7078	0.999997	967	0	0.46063	0.29235	0.29204	0.716356	834	1	0.46063
NonTargeting_Human_0804	1	0.70814	0.70822	0.999997	968	0	0.37374	0.29186	0.29155	0.716356	833	1	0.37374
NonTargeting_Human_0608	1	0.70921	0.70939	0.999997	969	0	0.33489	0.29079	0.29045	0.716356	831	1	0.33489
NonTargeting_Human_0500	1	0.70929	0.70949	0.999997	970	0	0.39949	0.29071	0.29034	0.716356	830	1	0.39949
NonTargeting_Human_0014	1	0.71044	0.71056	0.999997	971	0	0.35635	0.28956	0.28928	0.716356	829	1	0.35635
NonTargeting_Human_0906	1	0.71077	0.71088	0.999997	972	0	0.29807	0.28923	0.28899	0.716356	828	1	0.29807
NonTargeting_Human_0813	1	0.71126	0.7114	0.999997	973	0	0.384	0.28874	0.28848	0.716356	827	1	0.384
NonTargeting_Human_0033	1	0.71175	0.71194	0.999997	974	0	0.33189	0.28825	0.28797	0.716356	826	1	0.33189
NonTargeting_Human_0709	1	0.71208	0.71223	0.999997	975	0	0.39449	0.28792	0.28761	0.716356	824	1	0.39449
NonTargeting_Human_0530	1	0.71323	0.7135	0.999997	976	0	0.25205	0.28677	0.28639	0.716356	822	1	0.25205
NonTargeting_Human_0602	1	0.71339	0.71369	0.999997	977	0	0.29274	0.28661	0.28626	0.716356	821	1	0.29274
NonTargeting_Human_0017	1	0.7138	0.71406	0.999997	978	0	0.27465	0.2862	0.28583	0.716356	819	1	0.27465
NonTargeting_Human_0905	1	0.71388	0.71412	0.999997	979	0	0.43311	0.28612	0.28575	0.716356	818	1	0.43311
NonTargeting_Human_0668	1	0.71454	0.71478	0.999997	980	0	0.35525	0.28546	0.28507	0.716356	816	1	0.35525
NonTargeting_Human_0746	1	0.71503	0.71529	0.999997	981	0	0.382	0.28497	0.28452	0.716356	815	1	0.382
MED1	15	0.71504	0.90086	0.999997	982	3	0.22328	0.50939	0.80592	0.993493	1235	5	0.22328
NonTargeting_Human_0347	1	0.71692	0.71726	0.999997	983	0	0.40419	0.28308	0.28264	0.716356	814	1	0.40419
AHSP	15	0.71705	0.90174	0.999997	984	4	0.087031	0.20885	0.51057	0.808838	659	6	0.087031
NonTargeting_Human_0517	1	0.71749	0.71788	0.999997	985	0	0.38706	0.28251	0.28215	0.716356	813	1	0.38706
NonTargeting_Human_0322	1	0.71774	0.71808	0.999997	986	0	0.36303	0.28226	0.28191	0.716356	812	1	0.36303
NonTargeting_Human_0696	1	0.71897	0.71922	0.999997	987	0	0.43216	0.28103	0.28068	0.714764	811	1	0.43216
NonTargeting_Human_0135	1	0.7202	0.72041	0.999997	988	0	0.35082	0.2798	0.27953	0.712864	809	1	0.35082
NonTargeting_Human_0755	1	0.72069	0.72092	0.999997	989	0	0.41064	0.27931	0.27908	0.712749	808	1	0.41064
NonTargeting_Human_0267	1	0.72093	0.72117	0.999997	990	0	0.31447	0.27907	0.27882	0.712749	807	1	0.31447
NonTargeting_Human_0825	1	0.72192	0.72225	0.999997	991	0	0.46654	0.27808	0.27785	0.711677	805	1	0.46654
NonTargeting_Human_0071	1	0.72347	0.724	0.999997	992	0	0.35366	0.27653	0.27641	0.709023	803	1	0.35366
FAM21A	15	0.72366	0.90441	0.999997	993	4	0.0066861	0.74139	0.92147	0.999997	1483	4	0.0066861
NonTargeting_Human_0873	1	0.7238	0.72425	0.999997	994	0	0.27852	0.2762	0.27606	0.709023	802	1	0.27852
NonTargeting_Human_0101	1	0.72388	0.72432	0.999997	995	0	0.29463	0.27612	0.27598	0.709023	801	1	0.29463
NonTargeting_Human_0834	1	0.72438	0.72478	0.999997	996	0	0.4675	0.27562	0.27555	0.709023	800	1	0.4675
NonTargeting_Human_0383	1	0.72446	0.72488	0.999997	997	0	0.40362	0.27554	0.27546	0.709023	799	1	0.40362
NonTargeting_Human_0952	1	0.7247	0.72521	0.999997	998	0	0.19679	0.2753	0.27523	0.709023	797	1	0.19679
NonTargeting_Human_0837	1	0.72479	0.72531	0.999997	999	0	0.38953	0.27521	0.27515	0.709023	796	1	0.38953
NonTargeting_Human_0611	1	0.72577	0.72624	0.999997	1000	0	0.38395	0.27423	0.27408	0.709023	794	1	0.38395
hsa-mir-638	15	0.72594	0.90542	0.999997	1001	4	0.26092	0.0723	0.25869	0.700273	320	8	0.26092
NonTargeting_Human_0864	1	0.72667	0.7271	0.999997	1002	0	0.32192	0.27333	0.27316	0.708992	792	1	0.32192
NonTargeting_Human_0093	1	0.72708	0.72753	0.999997	1003	0	0.39856	0.27292	0.27277	0.708992	791	1	0.39856
NonTargeting_Human_0473	1	0.72757	0.728	0.999997	1004	0	0.51361	0.27243	0.27238	0.708992	790	1	0.51361
NonTargeting_Human_0847	1	0.72774	0.7282	0.999997	1005	0	0.4038	0.27226	0.27222	0.708992	789	1	0.4038
CAPZB	15	0.72777	0.90623	0.999997	1006	4	-0.043641	0.24133	0.5548	0.836421	732	5	-0.043641
FZD6	15	0.72784	0.90624	0.999997	1007	3	0.49196	0.0055475	0.034605	0.413579	98	10	0.49196
NonTargeting_Human_0323	1	0.72815	0.72852	0.999997	1008	0	0.48063	0.27185	0.27181	0.708992	788	1	0.48063
CTIF	15	0.73075	0.90743	0.999997	1009	2	0.39332	0.0071391	0.042591	0.441531	107	9	0.39332
NonTargeting_Human_0341	1	0.73102	0.7314	0.999997	1010	0	0.28351	0.26898	0.269	0.70468	786	1	0.28351
NonTargeting_Human_0308	1	0.73118	0.73155	0.999997	1011	0	0.35071	0.26882	0.26882	0.70468	785	1	0.35071
NonTargeting_Human_0532	1	0.73126	0.73161	0.999997	1012	0	0.33827	0.26874	0.26873	0.70468	784	1	0.33827
IGF1R	15	0.73161	0.9078	0.999997	1013	4	0.063883	0.19726	0.49446	0.799172	635	6	0.063883
NonTargeting_Human_0431	1	0.73225	0.73256	0.999997	1014	0	0.49877	0.26775	0.26777	0.70468	783	1	0.49877
NonTargeting_Human_0260	1	0.73249	0.73278	0.999997	1015	0	0.35806	0.26751	0.26755	0.70468	782	1	0.35806
NonTargeting_Human_0676	1	0.73266	0.73294	0.999997	1016	0	0.49571	0.26734	0.26735	0.70468	781	1	0.49571
NonTargeting_Human_0110	1	0.73274	0.73302	0.999997	1017	0	0.39762	0.26726	0.26726	0.70468	780	1	0.39762
NonTargeting_Human_0771	1	0.7329	0.73315	0.999997	1018	0	0.6652	0.2671	0.2671	0.70468	779	1	0.6652
GP1BB	15	0.73438	0.909	0.999997	1019	3	0.17321	0.13281	0.39141	0.761231	479	7	0.17321
NonTargeting_Human_0946	1	0.73454	0.7348	0.999997	1020	0	0.49122	0.26546	0.26555	0.70468	778	1	0.49122
NonTargeting_Human_0191	1	0.73512	0.73542	0.999997	1021	0	0.47635	0.26488	0.26493	0.70468	776	1	0.47635
PHF3	15	0.73541	0.90948	0.999997	1022	2	0.25454	0.14589	0.41647	0.771007	512	8	0.25454
NonTargeting_Human_0981	1	0.73545	0.7358	0.999997	1023	0	0.61965	0.26455	0.26454	0.70468	775	1	0.61965
NonTargeting_Human_0603	1	0.73627	0.73668	0.999997	1024	0	0.32742	0.26373	0.2637	0.70468	773	1	0.32742
NonTargeting_Human_0314	1	0.73725	0.73763	0.999997	1025	0	0.48199	0.26275	0.26264	0.704661	771	1	0.48199
NonTargeting_Human_0446	1	0.73733	0.73772	0.999997	1026	0	0.32192	0.26267	0.26253	0.704661	770	1	0.32192
NonTargeting_Human_0814	1	0.73856	0.739	0.999997	1027	0	0.41491	0.26144	0.26128	0.703176	768	1	0.41491
NonTargeting_Human_0631	1	0.73996	0.74037	0.999997	1028	0	0.37604	0.26004	0.2599	0.700724	766	1	0.37604
NonTargeting_Human_0975	1	0.74102	0.74147	0.999997	1029	0	0.32923	0.25898	0.25901	0.700273	764	1	0.32923
NonTargeting_Human_0411	1	0.74176	0.74219	0.999997	1030	0	0.36634	0.25824	0.2583	0.700273	763	1	0.36634
NonTargeting_Human_0575	1	0.74184	0.74227	0.999997	1031	0	0.36206	0.25816	0.2582	0.700273	762	1	0.36206
NonTargeting_Human_0330	1	0.74266	0.74318	0.999997	1032	0	0.45277	0.25734	0.25725	0.700273	761	1	0.45277
NonTargeting_Human_0318	1	0.74274	0.74324	0.999997	1033	0	0.44142	0.25726	0.2571	0.700273	760	1	0.44142
NonTargeting_Human_0993	1	0.74348	0.74393	0.999997	1034	0	0.48251	0.25652	0.25633	0.700273	758	1	0.48251
NonTargeting_Human_0102	1	0.74389	0.74427	0.999997	1035	0	0.4194	0.25611	0.25593	0.700273	757	1	0.4194
NonTargeting_Human_0200	1	0.74422	0.74462	0.999997	1036	0	0.36916	0.25578	0.25561	0.700273	756	1	0.36916
NonTargeting_Human_0425	1	0.74447	0.74485	0.999997	1037	0	0.34275	0.25553	0.25536	0.700273	755	1	0.34275
NonTargeting_Human_0596	1	0.74463	0.74502	0.999997	1038	0	0.47786	0.25537	0.25524	0.700273	754	1	0.47786
NonTargeting_Human_0123	1	0.74471	0.74513	0.999997	1039	0	0.28407	0.25529	0.25513	0.700273	753	1	0.28407
TMEM134	15	0.74486	0.91352	0.999997	1040	3	0.25382	0.26405	0.58482	0.862457	774	7	0.25382
NonTargeting_Human_0490	1	0.74529	0.74578	0.999997	1041	0	0.38566	0.25471	0.25457	0.700273	752	1	0.38566
NonTargeting_Human_0062	1	0.74545	0.74596	0.999997	1042	0	0.395	0.25455	0.25433	0.700273	751	1	0.395
NonTargeting_Human_0215	1	0.74561	0.74611	0.999997	1043	0	0.55962	0.25439	0.2542	0.700273	749	1	0.55962
MRPL42	15	0.74592	0.9141	0.999997	1044	2	0.29227	0.10065	0.32337	0.727123	403	8	0.29227
NonTargeting_Human_0651	1	0.74652	0.74695	0.999997	1045	0	0.29388	0.25348	0.25334	0.700273	748	1	0.29388
NonTargeting_Human_0558	1	0.74701	0.74747	0.999997	1046	0	0.42757	0.25299	0.25286	0.700273	747	1	0.42757
NonTargeting_Human_0858	1	0.7484	0.74872	0.999997	1047	0	0.46441	0.2516	0.25139	0.700273	746	1	0.46441
YME1L1	15	0.74859	0.91524	0.999997	1048	4	-0.12416	0.4984	0.79953	0.992755	1213	6	-0.12416
MRPS21	15	0.74967	0.91576	0.999997	1049	4	-0.019342	0.095043	0.31098	0.722595	380	5	-0.019342
NonTargeting_Human_0914	1	0.74988	0.75012	0.999997	1050	0	0.38349	0.25012	0.24998	0.700273	745	1	0.38349
NonTargeting_Human_0099	1	0.74996	0.75019	0.999997	1051	0	0.49527	0.25004	0.24991	0.700273	744	1	0.49527
OLR1	15	0.75024	0.91608	0.999997	1052	3	0.20017	0.49359	0.79564	0.990025	1208	6	0.20017
NonTargeting_Human_0783	1	0.75045	0.75068	0.999997	1053	0	0.97691	0.24955	0.24944	0.700273	743	1	0.97691
NonTargeting_Human_0107	1	0.75061	0.75082	0.999997	1054	0	0.30856	0.24939	0.24928	0.700273	742	1	0.30856
NonTargeting_Human_0933	1	0.75168	0.75198	0.999997	1055	0	0.33498	0.24832	0.24827	0.700273	741	1	0.33498
LIMS3	15	0.75193	0.91688	0.999997	1056	3	0.2173	0.15745	0.43565	0.77796	538	6	0.2173
NonTargeting_Human_0817	1	0.75217	0.75252	0.999997	1057	0	0.50212	0.24783	0.24783	0.700273	740	1	0.50212
NonTargeting_Human_0108	1	0.75258	0.75294	0.999997	1058	0	0.41785	0.24742	0.24749	0.700273	739	1	0.41785
TP53TG3	15	0.75397	0.91773	0.999997	1059	4	-0.11561	0.90338	0.97383	0.999997	1601	1	-0.11561
NonTargeting_Human_0164	1	0.75414	0.7545	0.999997	1060	0	0.62782	0.24586	0.24582	0.700273	737	1	0.62782
SLC7A6OS	15	0.75426	0.91786	0.999997	1061	2	0.31447	0.27714	0.60156	0.873547	804	7	0.31447
AMTN	15	0.75523	0.91832	0.999997	1062	4	0.18826	0.18398	0.47562	0.787344	597	7	0.18826
MAOB	15	0.75596	0.91864	0.999997	1063	3	0.46299	0.038736	0.16456	0.643333	231	8	0.46299
NonTargeting_Human_0553	1	0.75668	0.75711	0.999997	1064	0	0.41375	0.24332	0.24327	0.696426	736	1	0.41375
OTC	15	0.75714	0.91917	0.999997	1065	4	0.20716	0.23954	0.55246	0.835122	729	7	0.20716
NonTargeting_Human_0929	1	0.75832	0.75867	0.999997	1066	0	0.39867	0.24168	0.24163	0.692851	733	1	0.39867
MORC2	15	0.75861	0.91977	0.999997	1067	4	0.12126	0.16911	0.45375	0.784233	567	5	0.12126
NonTargeting_Human_0685	1	0.75881	0.75927	0.999997	1068	0	0.78855	0.24119	0.24118	0.692688	731	1	0.78855
BID	15	0.75903	0.91996	0.999997	1069	4	0.050595	0.074365	0.26344	0.70468	327	7	0.050595
NonTargeting_Human_0321	1	0.76013	0.76054	0.999997	1070	0	0.40206	0.23987	0.23977	0.689777	730	1	0.40206
UPP2	15	0.76046	0.92068	0.999997	1071	3	0.39585	0.016174	0.084308	0.550352	152	9	0.39585
NonTargeting_Human_0022	1	0.76062	0.76098	0.999997	1072	0	0.39683	0.23938	0.23928	0.689777	728	1	0.39683
NonTargeting_Human_0534	1	0.76095	0.76132	0.999997	1073	0	0.37252	0.23905	0.23894	0.689777	727	1	0.37252
NonTargeting_Human_0279	1	0.76111	0.76142	0.999997	1074	0	0.47931	0.23889	0.2388	0.689777	726	1	0.47931
PPP1CB	15	0.76213	0.92144	0.999997	1075	4	0.28726	0.063874	0.23877	0.689777	294	8	0.28726
NonTargeting_Human_0666	1	0.76283	0.76312	0.999997	1076	0	0.55099	0.23717	0.23711	0.689777	725	1	0.55099
NonTargeting_Human_0230	1	0.76373	0.76402	0.999997	1077	0	0.44887	0.23627	0.23618	0.689777	724	1	0.44887
NonTargeting_Human_0913	1	0.76431	0.76454	0.999997	1078	0	0.46506	0.23569	0.23559	0.689777	722	1	0.46506
NonTargeting_Human_0395	1	0.76578	0.76616	0.999997	1079	0	0.57562	0.23422	0.23428	0.689777	721	1	0.57562
NonTargeting_Human_0057	1	0.76587	0.76625	0.999997	1080	0	0.41633	0.23413	0.23418	0.689777	720	1	0.41633
NonTargeting_Human_0012	1	0.76677	0.76723	0.999997	1081	0	0.47995	0.23323	0.23322	0.689777	718	1	0.47995
NonTargeting_Human_0208	1	0.76693	0.76739	0.999997	1082	0	0.47926	0.23307	0.23304	0.689777	717	1	0.47926
SCYL1	15	0.76756	0.92382	0.999997	1083	4	-0.12977	0.38721	0.70761	0.936584	1019	5	-0.12977
NonTargeting_Human_0011	1	0.76767	0.76818	0.999997	1084	0	0.4215	0.23233	0.2323	0.689777	716	1	0.4215
NonTargeting_Human_0996	1	0.76816	0.76874	0.999997	1085	0	1.2989	0.23184	0.2318	0.689497	715	1	1.2989
NonTargeting_Human_0727	1	0.76915	0.76961	0.999997	1086	0	0.46807	0.23085	0.23094	0.688094	714	1	0.46807
NonTargeting_Human_0606	1	0.76972	0.77018	0.999997	1087	0	0.59623	0.23028	0.23023	0.687157	713	1	0.59623
NonTargeting_Human_0820	1	0.76988	0.77032	0.999997	1088	0	0.37727	0.23012	0.23007	0.687157	712	1	0.37727
NonTargeting_Human_0762	1	0.77021	0.77068	0.999997	1089	0	0.40557	0.22979	0.22979	0.687157	710	1	0.40557
NonTargeting_Human_0248	1	0.77046	0.77089	0.999997	1090	0	0.44297	0.22954	0.22953	0.687157	709	1	0.44297
NonTargeting_Human_0243	1	0.77185	0.77238	0.999997	1091	0	0.45167	0.22815	0.22823	0.687157	707	1	0.45167
BTF3	15	0.77225	0.92598	0.999997	1092	4	0.26303	0.54387	0.82459	0.999997	1281	5	0.26303
NonTargeting_Human_0739	1	0.77284	0.77334	0.999997	1093	0	0.70896	0.22716	0.22708	0.685925	706	1	0.70896
NonTargeting_Human_0819	1	0.77292	0.77341	0.999997	1094	0	0.33919	0.22708	0.22702	0.685925	705	1	0.33919
NonTargeting_Human_0252	1	0.77366	0.77415	0.999997	1095	0	0.32513	0.22634	0.2262	0.685644	704	1	0.32513
STARD4	15	0.77406	0.92684	0.999997	1096	3	0.52198	0.0096772	0.05491	0.495278	119	8	0.52198
NonTargeting_Human_0637	1	0.77505	0.77549	0.999997	1097	0	0.36969	0.22495	0.2247	0.682285	702	1	0.36969
NonTargeting_Human_0551	1	0.77521	0.77567	0.999997	1098	0	0.35268	0.22479	0.22453	0.682285	700	1	0.35268
ADAMTSL1	15	0.77561	0.92751	0.999997	1099	3	0.31341	0.021351	0.10525	0.574884	175	8	0.31341
NonTargeting_Human_0324	1	0.77571	0.77621	0.999997	1100	0	0.73187	0.22429	0.22396	0.682285	699	1	0.73187
NonTargeting_Human_0051	1	0.77628	0.77687	0.999997	1101	0	0.48189	0.22372	0.22332	0.681625	696	1	0.48189
NonTargeting_Human_0969	1	0.77677	0.77746	0.999997	1102	0	0.62377	0.22323	0.22288	0.681484	695	1	0.62377
NonTargeting_Human_0129	1	0.7771	0.77777	0.999997	1103	0	0.63761	0.2229	0.22257	0.681484	694	1	0.63761
NonTargeting_Human_0149	1	0.77735	0.77804	0.999997	1104	0	0.40418	0.22265	0.22236	0.681484	692	1	0.40418
CCDC169-SOHLH2	15	0.77769	0.92841	0.999997	1105	3	0.28581	0.034822	0.1517	0.631323	218	8	0.28581
NonTargeting_Human_0018	1	0.77776	0.77842	0.999997	1106	0	0.42482	0.22224	0.22195	0.681484	691	1	0.42482
NonTargeting_Human_0242	1	0.77923	0.77983	0.999997	1107	0	0.39277	0.22077	0.22048	0.680057	688	1	0.39277
NonTargeting_Human_0234	1	0.77931	0.77991	0.999997	1108	0	0.37824	0.22069	0.2204	0.680057	687	1	0.37824
NonTargeting_Human_0714	1	0.77972	0.78032	0.999997	1109	0	0.77809	0.22028	0.22	0.680057	686	1	0.77809
NonTargeting_Human_0640	1	0.77989	0.78046	0.999997	1110	0	0.48893	0.22011	0.21983	0.680057	685	1	0.48893
NonTargeting_Human_0030	1	0.78005	0.7807	0.999997	1111	0	0.44813	0.21995	0.21964	0.680057	684	1	0.44813
NonTargeting_Human_0605	1	0.78169	0.7824	0.999997	1112	0	0.45863	0.21831	0.21815	0.680057	683	1	0.45863
NonTargeting_Human_0103	1	0.7821	0.78275	0.999997	1113	0	0.44507	0.2179	0.2177	0.680057	682	1	0.44507
NonTargeting_Human_0917	1	0.78218	0.78284	0.999997	1114	0	0.44505	0.21782	0.21763	0.680057	681	1	0.44505
NonTargeting_Human_0211	1	0.78308	0.78378	0.999997	1115	0	0.3146	0.21692	0.21672	0.680057	680	1	0.3146
NonTargeting_Human_0504	1	0.78349	0.78418	0.999997	1116	0	0.52356	0.21651	0.21625	0.680057	679	1	0.52356
NonTargeting_Human_0802	1	0.78448	0.78515	0.999997	1117	0	0.8057	0.21552	0.21532	0.679716	677	1	0.8057
NonTargeting_Human_0848	1	0.78554	0.78627	0.999997	1118	0	0.53867	0.21446	0.21421	0.677423	676	1	0.53867
KIAA1328	15	0.78577	0.93205	0.999997	1119	4	0.030219	0.42482	0.74011	0.956252	1087	6	0.030219
NonTargeting_Human_0937	1	0.78579	0.78653	0.999997	1120	0	0.47014	0.21421	0.21393	0.677423	674	1	0.47014
NonTargeting_Human_0963	1	0.78636	0.78705	0.999997	1121	0	0.69235	0.21364	0.21332	0.677061	673	1	0.69235
NonTargeting_Human_0172	1	0.78751	0.7882	0.999997	1122	0	0.52326	0.21249	0.21215	0.675055	671	1	0.52326
NonTargeting_Human_0087	1	0.78833	0.78895	0.999997	1123	0	0.54133	0.21167	0.2113	0.675055	670	1	0.54133
NonTargeting_Human_0987	1	0.7885	0.7891	0.999997	1124	0	0.87175	0.2115	0.21118	0.675055	669	1	0.87175
NonTargeting_Human_0831	1	0.78858	0.78917	0.999997	1125	0	0.61792	0.21142	0.21106	0.675055	668	1	0.61792
NonTargeting_Human_0806	1	0.78932	0.78987	0.999997	1126	0	0.45038	0.21068	0.2104	0.675055	667	1	0.45038
NonTargeting_Human_0750	1	0.78948	0.79004	0.999997	1127	0	0.75445	0.21052	0.21025	0.675055	666	1	0.75445
NonTargeting_Human_0861	1	0.78997	0.79047	0.999997	1128	0	0.40417	0.21003	0.20978	0.675055	664	1	0.40417
NonTargeting_Human_0273	1	0.79014	0.79062	0.999997	1129	0	0.48047	0.20986	0.20965	0.675055	663	1	0.48047
NonTargeting_Human_0317	1	0.79038	0.79092	0.999997	1130	0	0.43249	0.20962	0.20938	0.675055	662	1	0.43249
NonTargeting_Human_0570	1	0.79063	0.79111	0.999997	1131	0	0.47469	0.20937	0.2091	0.675055	661	1	0.47469
NonTargeting_Human_0376	1	0.79079	0.79129	0.999997	1132	0	0.42045	0.20921	0.2089	0.675055	660	1	0.42045
PIP5K1A	15	0.79122	0.93435	0.999997	1133	2	0.17154	0.096604	0.31444	0.724023	389	6	0.17154
ANAPC16	15	0.7916	0.93453	0.999997	1134	3	0.28754	0.070858	0.25543	0.700273	318	7	0.28754
NonTargeting_Human_0791	1	0.79161	0.79208	0.999997	1135	0	0.70676	0.20839	0.20813	0.675055	658	1	0.70676
FRG2C	15	0.792	0.93477	0.999997	1136	3	0.34081	0.054175	0.21195	0.675055	265	8	0.34081
DDX4	15	0.79232	0.93493	0.999997	1137	4	0.42005	0.027506	0.12696	0.601164	197	8	0.42005
NonTargeting_Human_0203	1	0.79292	0.79331	0.999997	1138	0	0.34183	0.20708	0.20695	0.675055	656	1	0.34183
NonTargeting_Human_0712	1	0.79342	0.79385	0.999997	1139	0	0.47373	0.20658	0.20641	0.675055	655	1	0.47373
NonTargeting_Human_0853	1	0.79432	0.79481	0.999997	1140	0	0.50832	0.20568	0.20557	0.675055	654	1	0.50832
NonTargeting_Human_0127	1	0.79522	0.79583	0.999997	1141	0	0.47786	0.20478	0.20476	0.675055	653	1	0.47786
NonTargeting_Human_0939	1	0.79563	0.79626	0.999997	1142	0	0.7161	0.20437	0.20427	0.675055	652	1	0.7161
NonTargeting_Human_0163	1	0.79661	0.79718	0.999997	1143	0	0.4245	0.20339	0.20323	0.675055	651	1	0.4245
NonTargeting_Human_0818	1	0.79694	0.7975	0.999997	1144	0	0.4715	0.20306	0.20293	0.675055	650	1	0.4715
NonTargeting_Human_0114	1	0.79735	0.79791	0.999997	1145	0	0.63806	0.20265	0.20242	0.675055	649	1	0.63806
NonTargeting_Human_0368	1	0.79743	0.79801	0.999997	1146	0	0.56341	0.20257	0.20236	0.675055	648	1	0.56341
RNF112	15	0.7978	0.93744	0.999997	1147	4	0.27049	0.18417	0.47591	0.787344	598	7	0.27049
MRPL21	15	0.79815	0.93764	0.999997	1148	3	-0.1632	0.44857	0.75931	0.966796	1124	4	-0.1632
NonTargeting_Human_0846	1	0.79825	0.79883	0.999997	1149	0	0.39142	0.20175	0.20154	0.675055	647	1	0.39142
NonTargeting_Human_0932	1	0.7985	0.79905	0.999997	1150	0	0.69345	0.2015	0.2013	0.675055	646	1	0.69345
NonTargeting_Human_0315	1	0.79858	0.79912	0.999997	1151	0	0.44266	0.20142	0.20122	0.675055	645	1	0.44266
NonTargeting_Human_0503	1	0.79916	0.79965	0.999997	1152	0	0.54363	0.20084	0.20057	0.675055	644	1	0.54363
MED12	15	0.7992	0.93806	0.999997	1153	3	0.44785	0.017524	0.090287	0.556983	160	8	0.44785
NonTargeting_Human_0803	1	0.79989	0.80047	0.999997	1154	0	0.52301	0.20011	0.19984	0.674593	642	1	0.52301
UBE2O	15	0.80073	0.93869	0.999997	1155	2	0.358	0.062794	0.23621	0.689777	291	8	0.358
NonTargeting_Human_0680	1	0.80162	0.80217	0.999997	1156	0	0.57487	0.19838	0.19811	0.670047	641	1	0.57487
NonTargeting_Human_0604	1	0.80178	0.80233	0.999997	1157	0	0.57008	0.19822	0.19795	0.670047	640	1	0.57008
NonTargeting_Human_0720	1	0.80186	0.8024	0.999997	1158	0	0.53293	0.19814	0.19789	0.670047	639	1	0.53293
NonTargeting_Human_0104	1	0.80252	0.8031	0.999997	1159	0	0.44637	0.19748	0.19716	0.670047	637	1	0.44637
NonTargeting_Human_0564	1	0.80268	0.8032	0.999997	1160	0	0.43933	0.19732	0.19699	0.670047	636	1	0.43933
NonTargeting_Human_0136	1	0.80285	0.80328	0.999997	1161	0	0.65045	0.19715	0.19686	0.670047	634	1	0.65045
NonTargeting_Human_0478	1	0.80317	0.80364	0.999997	1162	0	0.47246	0.19683	0.19655	0.670047	633	1	0.47246
UHRF2	15	0.80351	0.93935	0.999997	1163	3	0.14877	0.054283	0.2123	0.675055	266	6	0.14877
NonTargeting_Human_0434	1	0.80399	0.80449	0.999997	1164	0	0.61343	0.19601	0.19575	0.670047	632	1	0.61343
NonTargeting_Human_0201	1	0.80408	0.80458	0.999997	1165	0	0.37132	0.19592	0.19562	0.670047	631	1	0.37132
NonTargeting_Human_0055	1	0.80432	0.80484	0.999997	1166	0	0.62395	0.19568	0.19536	0.670047	630	1	0.62395
ICA1L	15	0.80505	0.93975	0.999997	1167	1	0.22161	0.084606	0.28731	0.716356	352	7	0.22161
NonTargeting_Human_0364	1	0.80514	0.80563	0.999997	1168	0	0.66821	0.19486	0.19456	0.670047	628	1	0.66821
KBTBD12	15	0.80525	0.93983	0.999997	1169	3	0.22764	0.022513	0.10941	0.576383	179	7	0.22764
CLEC12B	15	0.80559	0.93994	0.999997	1170	1	0.30033	0.13537	0.39622	0.761231	488	8	0.30033
NonTargeting_Human_0826	1	0.8058	0.80624	0.999997	1171	0	0.53639	0.1942	0.194	0.670047	625	1	0.53639
NonTargeting_Human_0954	1	0.80612	0.8065	0.999997	1172	0	0.41382	0.19388	0.19371	0.670047	624	1	0.41382
NonTargeting_Human_0759	1	0.80629	0.80666	0.999997	1173	0	0.44229	0.19371	0.19356	0.670047	623	1	0.44229
SULT6B1	15	0.8066	0.94021	0.999997	1174	3	0.17296	0.14168	0.40862	0.769962	501	6	0.17296
NonTargeting_Human_0622	1	0.80678	0.80708	0.999997	1175	0	0.52383	0.19322	0.19309	0.670047	622	1	0.52383
NonTargeting_Human_0069	1	0.80719	0.80748	0.999997	1176	0	0.44537	0.19281	0.19262	0.670047	621	1	0.44537
NIPSNAP1	15	0.80737	0.94039	0.999997	1177	3	0.033617	0.68628	0.90034	0.999997	1439	5	0.033617
NonTargeting_Human_0113	1	0.80776	0.808	0.999997	1178	0	0.51052	0.19224	0.19209	0.670047	620	1	0.51052
NonTargeting_Human_0063	1	0.80801	0.80821	0.999997	1179	0	0.54325	0.19199	0.19187	0.670047	619	1	0.54325
NonTargeting_Human_0405	1	0.80817	0.80834	0.999997	1180	0	0.44331	0.19183	0.19167	0.670047	618	1	0.44331
NonTargeting_Human_0904	1	0.80899	0.80902	0.999997	1181	0	0.63782	0.19101	0.19079	0.670047	617	1	0.63782
NonTargeting_Human_0356	1	0.8099	0.81001	0.999997	1182	0	0.58561	0.1901	0.18986	0.670047	615	1	0.58561
NonTargeting_Human_0059	1	0.81055	0.81058	0.999997	1183	0	0.62972	0.18945	0.18933	0.670047	614	1	0.62972
ZNF764	15	0.81103	0.94144	0.999997	1184	3	0.080731	0.66166	0.88754	0.999997	1413	4	0.080731
NonTargeting_Human_0394	1	0.81129	0.8113	0.999997	1185	0	0.47638	0.18871	0.18865	0.669048	613	1	0.47638
NonTargeting_Human_0495	1	0.81186	0.8118	0.999997	1186	0	0.50023	0.18814	0.18805	0.668297	612	1	0.50023
NonTargeting_Human_0788	1	0.81211	0.81205	0.999997	1187	0	0.60364	0.18789	0.18781	0.668297	611	1	0.60364
NonTargeting_Human_0822	1	0.81219	0.81212	0.999997	1188	0	0.63578	0.18781	0.18774	0.668297	610	1	0.63578
NonTargeting_Human_0779	1	0.81236	0.81231	0.999997	1189	0	0.71245	0.18764	0.18762	0.668297	609	1	0.71245
NonTargeting_Human_0716	1	0.81268	0.81268	0.999997	1190	0	0.5889	0.18732	0.18723	0.668297	608	1	0.5889
NonTargeting_Human_0138	1	0.81285	0.81281	0.999997	1191	0	0.53033	0.18715	0.18703	0.668297	607	1	0.53033
NonTargeting_Human_0100	1	0.81309	0.81307	0.999997	1192	0	0.55442	0.18691	0.18678	0.668297	606	1	0.55442
NonTargeting_Human_0777	1	0.81318	0.81315	0.999997	1193	0	0.705	0.18682	0.1867	0.668297	605	1	0.705
NonTargeting_Human_0122	1	0.81342	0.81339	0.999997	1194	0	0.31994	0.18658	0.18644	0.668297	604	1	0.31994
NonTargeting_Human_0223	1	0.8135	0.81344	0.999997	1195	0	0.60862	0.1865	0.18636	0.668297	603	1	0.60862
NonTargeting_Human_0316	1	0.81441	0.81434	0.999997	1196	0	0.50539	0.18559	0.18532	0.668297	602	1	0.50539
CLEC3B	15	0.81446	0.94243	0.999997	1197	2	0.21698	0.024392	0.11614	0.587675	185	7	0.21698
NonTargeting_Human_0229	1	0.81449	0.81437	0.999997	1198	0	0.35186	0.18551	0.18524	0.668297	601	1	0.35186
NonTargeting_Human_0985	1	0.81555	0.81536	0.999997	1199	0	0.60397	0.18445	0.18423	0.668297	599	1	0.60397
hsa-mir-1302-6	7	0.81569	0.87139	0.999997	1200	1	0.55096	0.043651	0.14075	0.618032	241	4	0.55096
NonTargeting_Human_0983	1	0.81728	0.81711	0.999997	1201	0	0.58889	0.18272	0.18271	0.668297	595	1	0.58889
NonTargeting_Human_0844	1	0.81736	0.81721	0.999997	1202	0	0.70571	0.18264	0.18264	0.668297	594	1	0.70571
NonTargeting_Human_0522	1	0.8176	0.81747	0.999997	1203	0	0.58297	0.1824	0.1824	0.668297	593	1	0.58297
NonTargeting_Human_0165	1	0.8181	0.81798	0.999997	1204	0	0.47727	0.1819	0.1819	0.668297	591	1	0.47727
NonTargeting_Human_0349	1	0.81826	0.81815	0.999997	1205	0	0.49573	0.18174	0.18174	0.668297	590	1	0.49573
NonTargeting_Human_0924	1	0.81908	0.81884	0.999997	1206	0	0.68366	0.18092	0.18088	0.668297	589	1	0.68366
NonTargeting_Human_0976	1	0.81924	0.81895	0.999997	1207	0	0.53066	0.18076	0.18071	0.668297	587	1	0.53066
NonTargeting_Human_0657	1	0.81941	0.81907	0.999997	1208	0	0.56277	0.18059	0.18055	0.668297	586	1	0.56277
NonTargeting_Human_0521	1	0.81982	0.8195	0.999997	1209	0	0.78828	0.18018	0.18022	0.668297	585	1	0.78828
EPAS1	15	0.82166	0.94428	0.999997	1210	3	0.26408	0.089585	0.29865	0.719981	365	7	0.26408
NonTargeting_Human_0903	1	0.8217	0.82145	0.999997	1211	0	0.59049	0.1783	0.17857	0.66705	584	1	0.59049
YPEL1	15	0.82186	0.94433	0.999997	1212	2	0.17342	0.26249	0.58287	0.861407	769	7	0.17342
NonTargeting_Human_0437	1	0.82203	0.82181	0.999997	1213	0	0.52281	0.17797	0.17827	0.66705	583	1	0.52281
NonTargeting_Human_0443	1	0.82211	0.82193	0.999997	1214	0	0.80938	0.17789	0.17822	0.66705	582	1	0.80938
NonTargeting_Human_0391	1	0.8231	0.82288	0.999997	1215	0	0.53528	0.1769	0.17727	0.666479	581	1	0.53528
NonTargeting_Human_0874	1	0.82375	0.82354	0.999997	1216	0	0.61708	0.17625	0.1765	0.665017	580	1	0.61708
NonTargeting_Human_0365	1	0.82449	0.82435	0.999997	1217	0	0.50499	0.17551	0.17586	0.664038	577	1	0.50499
NonTargeting_Human_0065	1	0.82466	0.82452	0.999997	1218	0	0.46797	0.17534	0.17574	0.664038	576	1	0.46797
SPDYE1	15	0.82514	0.94528	0.999997	1219	3	0.018246	0.172	0.45784	0.784233	571	4	0.018246
NonTargeting_Human_0797	1	0.82523	0.82511	0.999997	1220	0	0.56994	0.17477	0.17529	0.664038	575	1	0.56994
NonTargeting_Human_0188	1	0.8258	0.82568	0.999997	1221	0	0.70289	0.1742	0.17471	0.664038	574	1	0.70289
CIAPIN1	15	0.82611	0.94559	0.999997	1222	2	0.52865	0.011123	0.061613	0.501261	129	9	0.52865
NonTargeting_Human_0214	1	0.82728	0.82697	0.999997	1223	0	0.62622	0.17272	0.17315	0.660896	572	1	0.62622
NonTargeting_Human_0116	1	0.8281	0.82793	0.999997	1224	0	0.47362	0.1719	0.17229	0.659054	570	1	0.47362
NonTargeting_Human_0968	1	0.82867	0.82846	0.999997	1225	0	0.57338	0.17133	0.17169	0.658221	569	1	0.57338
BOLA2	15	0.82988	0.94671	0.999997	1226	3	-0.062839	0.53882	0.82192	0.999997	1276	4	-0.062839
NonTargeting_Human_0312	1	0.83105	0.83073	0.999997	1227	0	0.80977	0.16895	0.16943	0.650958	566	1	0.80977
C12orf43	15	0.83127	0.9471	0.999997	1228	3	0.11845	0.33201	0.65902	0.907659	914	6	0.11845
NonTargeting_Human_0735	1	0.83154	0.83128	0.999997	1229	0	0.56706	0.16846	0.16895	0.650958	565	1	0.56706
NonTargeting_Human_0938	1	0.83171	0.83146	0.999997	1230	0	0.62699	0.16829	0.16881	0.650958	564	1	0.62699
NonTargeting_Human_0863	1	0.83195	0.83169	0.999997	1231	0	0.60922	0.16805	0.16852	0.650958	563	1	0.60922
NonTargeting_Human_0224	1	0.8322	0.83195	0.999997	1232	0	0.7228	0.1678	0.16822	0.650958	561	1	0.7228
KAT7	15	0.83425	0.948	0.999997	1233	3	0.28196	0.19097	0.48552	0.793551	616	7	0.28196
ALDH3A2	15	0.83463	0.94812	0.999997	1234	3	0.026318	0.35848	0.68262	0.920682	964	3	0.026318
NonTargeting_Human_0270	1	0.83531	0.83501	0.999997	1235	0	0.49649	0.16469	0.16524	0.643333	559	1	0.49649
NonTargeting_Human_0543	1	0.83548	0.83518	0.999997	1236	0	0.53995	0.16452	0.16506	0.643333	558	1	0.53995
NonTargeting_Human_0617	1	0.83581	0.83555	0.999997	1237	0	0.45251	0.16419	0.16469	0.643333	557	1	0.45251
NonTargeting_Human_0856	1	0.83605	0.83583	0.999997	1238	0	0.73921	0.16395	0.16445	0.643333	556	1	0.73921
NonTargeting_Human_0563	1	0.83654	0.83631	0.999997	1239	0	0.58914	0.16346	0.16397	0.643333	555	1	0.58914
NonTargeting_Human_0559	1	0.83728	0.83716	0.999997	1240	0	0.67253	0.16272	0.16336	0.643333	553	1	0.67253
NonTargeting_Human_0131	1	0.83777	0.83768	0.999997	1241	0	0.59423	0.16223	0.16284	0.643333	551	1	0.59423
NonTargeting_Human_0796	1	0.83786	0.83775	0.999997	1242	0	0.94916	0.16214	0.16278	0.643333	550	1	0.94916
NonTargeting_Human_0468	1	0.83802	0.83792	0.999997	1243	0	0.53972	0.16198	0.1626	0.643333	549	1	0.53972
NonTargeting_Human_0815	1	0.83827	0.83816	0.999997	1244	0	0.82292	0.16173	0.16231	0.643333	548	1	0.82292
NonTargeting_Human_0432	1	0.83884	0.83872	0.999997	1245	0	0.4848	0.16116	0.16181	0.643333	546	1	0.4848
NonTargeting_Human_0197	1	0.84064	0.84061	0.999997	1246	0	0.66582	0.15936	0.15997	0.641355	543	1	0.66582
C9orf41	15	0.84111	0.95002	0.999997	1247	3	0.27778	0.053871	0.21102	0.675055	264	7	0.27778
NonTargeting_Human_0516	1	0.84179	0.84183	0.999997	1248	0	0.66211	0.15821	0.15884	0.639624	540	1	0.66211
TRIM8	15	0.84211	0.95035	0.999997	1249	3	0.53615	0.0019143	0.0136	0.311696	66	9	0.53615
NonTargeting_Human_0767	1	0.84253	0.84262	0.999997	1250	0	0.61784	0.15747	0.15798	0.637736	539	1	0.61784
HAPLN1	15	0.84277	0.95054	0.999997	1251	3	0.14662	0.52073	0.81208	0.996329	1254	4	0.14662
SLAMF6	15	0.8431	0.95065	0.999997	1252	3	0.16931	0.24233	0.55618	0.836421	735	7	0.16931
GCFC2	15	0.84372	0.95085	0.999997	1253	2	0.28195	0.12715	0.37939	0.753805	468	8	0.28195
AQP10	15	0.84392	0.95092	0.999997	1254	3	0.31559	0.086237	0.29099	0.716356	356	7	0.31559
NonTargeting_Human_0423	1	0.84401	0.8441	0.999997	1255	0	0.51073	0.15599	0.15647	0.636064	535	1	0.51073
NonTargeting_Human_0860	1	0.84409	0.84417	0.999997	1256	0	0.60391	0.15591	0.15639	0.636064	534	1	0.60391
SLC26A4	15	0.84473	0.95118	0.999997	1257	3	0.38041	0.14141	0.40809	0.769962	500	8	0.38041
NonTargeting_Human_0384	1	0.84524	0.84519	0.999997	1258	0	0.47758	0.15476	0.1554	0.634621	533	1	0.47758
NonTargeting_Human_0360	1	0.84532	0.84526	0.999997	1259	0	0.62972	0.15468	0.15533	0.634621	532	1	0.62972
NonTargeting_Human_0751	1	0.84573	0.84576	0.999997	1260	0	0.89659	0.15427	0.15497	0.634621	531	1	0.89659
SVOP	15	0.84594	0.95157	0.999997	1261	3	0.25048	0.085504	0.28937	0.716356	353	7	0.25048
NonTargeting_Human_0295	1	0.84655	0.84661	0.999997	1262	0	0.6954	0.15345	0.15412	0.633861	530	1	0.6954
NonTargeting_Human_0256	1	0.84671	0.84679	0.999997	1263	0	0.54237	0.15329	0.15397	0.633861	529	1	0.54237
NonTargeting_Human_0589	1	0.8472	0.84731	0.999997	1264	0	0.59893	0.1528	0.15355	0.633861	528	1	0.59893
NonTargeting_Human_0525	1	0.84745	0.84752	0.999997	1265	0	0.51798	0.15255	0.15331	0.633861	527	1	0.51798
NonTargeting_Human_0141	1	0.8495	0.8494	0.999997	1266	0	0.41288	0.1505	0.15139	0.631323	526	1	0.41288
NonTargeting_Human_0438	1	0.84991	0.84989	0.999997	1267	0	0.57158	0.15009	0.1509	0.630981	525	1	0.57158
NonTargeting_Human_0054	1	0.85007	0.85002	0.999997	1268	0	0.54388	0.14993	0.15076	0.630981	523	1	0.54388
NonTargeting_Human_0281	1	0.85024	0.85015	0.999997	1269	0	0.49476	0.14976	0.15059	0.630981	522	1	0.49476
NonTargeting_Human_0833	1	0.8504	0.85027	0.999997	1270	0	0.60791	0.1496	0.15041	0.630981	521	1	0.60791
NonTargeting_Human_0639	1	0.85081	0.85068	0.999997	1271	0	0.55467	0.14919	0.15003	0.630981	520	1	0.55467
NonTargeting_Human_0076	1	0.85139	0.85122	0.999997	1272	0	0.56766	0.14861	0.14947	0.630981	519	1	0.56766
SDHAF1	15	0.85241	0.95357	0.999997	1273	3	-0.055632	0.22221	0.52906	0.81637	690	6	-0.055632
NonTargeting_Human_0075	1	0.85253	0.85241	0.999997	1274	0	0.60959	0.14747	0.14835	0.629312	518	1	0.60959
NonTargeting_Human_0840	1	0.85335	0.85318	0.999997	1275	0	0.49687	0.14665	0.14756	0.627475	516	1	0.49687
NonTargeting_Human_0403	1	0.85401	0.85376	0.999997	1276	0	0.70551	0.14599	0.14691	0.626256	513	1	0.70551
NOTCH2NL	15	0.85428	0.95417	0.999997	1277	3	0.096482	0.067134	0.24662	0.700273	304	7	0.096482
NonTargeting_Human_0705	1	0.85442	0.85421	0.999997	1278	0	0.42993	0.14558	0.14649	0.625972	511	1	0.42993
NonTargeting_Human_0326	1	0.85499	0.85477	0.999997	1279	0	0.56331	0.14501	0.14602	0.625493	509	1	0.56331
WRNIP1	15	0.85721	0.95505	0.999997	1280	3	0.2863	0.025075	0.11859	0.587675	191	9	0.2863
NonTargeting_Human_0157	1	0.85737	0.85743	0.999997	1281	0	0.7086	0.14263	0.14378	0.618934	506	1	0.7086
NonTargeting_Human_0287	1	0.85745	0.85753	0.999997	1282	0	0.58881	0.14255	0.14372	0.618934	505	1	0.58881
NonTargeting_Human_0327	1	0.85778	0.85787	0.999997	1283	0	0.61851	0.14222	0.14342	0.618934	504	1	0.61851
NonTargeting_Human_0730	1	0.85786	0.85794	0.999997	1284	0	0.52248	0.14214	0.14334	0.618934	503	1	0.52248
NonTargeting_Human_0120	1	0.85877	0.85885	0.999997	1285	0	0.60769	0.14123	0.1424	0.618934	499	1	0.60769
NonTargeting_Human_0290	1	0.85885	0.85895	0.999997	1286	0	0.61167	0.14115	0.14232	0.618934	498	1	0.61167
NonTargeting_Human_0885	1	0.85909	0.85915	0.999997	1287	0	0.84934	0.14091	0.14203	0.618934	496	1	0.84934
NonTargeting_Human_0002	1	0.86024	0.86031	0.999997	1288	0	0.79043	0.13976	0.14083	0.618032	495	1	0.79043
NonTargeting_Human_0284	1	0.86032	0.86042	0.999997	1289	0	0.5287	0.13968	0.14076	0.618032	494	1	0.5287
ANKRD35	15	0.8604	0.95596	0.999997	1290	3	0.063486	0.48154	0.78604	0.985081	1187	6	0.063486
NonTargeting_Human_0567	1	0.86073	0.86082	0.999997	1291	0	0.60921	0.13927	0.14043	0.618032	493	1	0.60921
NonTargeting_Human_0280	1	0.86098	0.86112	0.999997	1292	0	0.68906	0.13902	0.14015	0.618032	492	1	0.68906
CBWD1	15	0.86099	0.95615	0.999997	1293	3	0.0227	0.40175	0.72034	0.943225	1046	6	0.0227
ZW10	15	0.86142	0.9563	0.999997	1294	3	0.059283	0.14604	0.41675	0.771007	514	5	0.059283
NonTargeting_Human_0958	1	0.86188	0.86193	0.999997	1295	0	0.45242	0.13812	0.13921	0.618032	491	1	0.45242
NonTargeting_Human_0881	1	0.86311	0.86316	0.999997	1296	0	0.80235	0.13689	0.1379	0.614781	490	1	0.80235
NonTargeting_Human_0209	1	0.8636	0.86371	0.999997	1297	0	0.70846	0.1364	0.13741	0.614127	489	1	0.70846
ZNF548	15	0.86381	0.95699	0.999997	1298	3	0.2087	0.19771	0.49514	0.79953	638	7	0.2087
NonTargeting_Human_0070	1	0.86508	0.86507	0.999997	1299	0	0.59203	0.13492	0.13589	0.608886	487	1	0.59203
NonTargeting_Human_0064	1	0.8659	0.86588	0.999997	1300	0	0.87704	0.1341	0.13516	0.607172	486	1	0.87704
NonTargeting_Human_0931	1	0.86614	0.86611	0.999997	1301	0	0.68158	0.13386	0.13492	0.607172	485	1	0.68158
NonTargeting_Human_0675	1	0.86639	0.86634	0.999997	1302	0	0.60208	0.13361	0.13469	0.607172	484	1	0.60208
NonTargeting_Human_0498	1	0.86655	0.86653	0.999997	1303	0	0.71858	0.13345	0.13451	0.607172	482	1	0.71858
NonTargeting_Human_0417	1	0.86664	0.86666	0.999997	1304	0	0.59726	0.13336	0.13446	0.607172	481	1	0.59726
NonTargeting_Human_0088	1	0.8668	0.86677	0.999997	1305	0	0.5901	0.1332	0.13431	0.607172	480	1	0.5901
CWC22	15	0.86681	0.95807	0.999997	1306	2	0.13569	0.20041	0.4989	0.80301	643	6	0.13569
NonTargeting_Human_0414	1	0.86729	0.86731	0.999997	1307	0	0.57621	0.13271	0.13384	0.607172	478	1	0.57621
NonTargeting_Human_0514	1	0.86746	0.86747	0.999997	1308	0	0.69767	0.13254	0.13368	0.607172	477	1	0.69767
NonTargeting_Human_0726	1	0.86811	0.86811	0.999997	1309	0	0.61473	0.13189	0.13301	0.607172	476	1	0.61473
hsa-mir-532	15	0.86861	0.95875	0.999997	1310	3	-0.039467	0.96461	0.98973	0.999997	1641	1	-0.039467
NonTargeting_Human_0233	1	0.86877	0.86867	0.999997	1311	0	0.69029	0.13123	0.13223	0.607172	475	1	0.69029
KCNK4	15	0.86946	0.95906	0.999997	1312	3	0.13758	0.090243	0.30025	0.719981	367	7	0.13758
NonTargeting_Human_0481	1	0.86959	0.86936	0.999997	1313	0	0.58538	0.13041	0.1314	0.607172	474	1	0.58538
NonTargeting_Human_0276	1	0.87074	0.87053	0.999997	1314	0	0.63227	0.12926	0.13032	0.607172	472	1	0.63227
hsa-mir-7973-1	4	0.8709	0.87119	0.999997	1315	0	0.00086598	0.73632	0.75529	0.966488	1479	1	0.00086598
NonTargeting_Human_0027	1	0.87139	0.87122	0.999997	1316	0	0.81662	0.12861	0.12965	0.607172	471	1	0.81662
NonTargeting_Human_0105	1	0.87188	0.87172	0.999997	1317	0	0.60839	0.12812	0.12909	0.606336	470	1	0.60839
NonTargeting_Human_0580	1	0.87279	0.87257	0.999997	1318	0	0.70236	0.12721	0.12824	0.605602	469	1	0.70236
NonTargeting_Human_0663	1	0.87525	0.87509	0.999997	1319	0	0.77663	0.12475	0.12596	0.598044	464	1	0.77663
NonTargeting_Human_0531	1	0.87566	0.87548	0.999997	1320	0	0.71141	0.12434	0.12557	0.598044	462	1	0.71141
NonTargeting_Human_0034	1	0.87598	0.8757	0.999997	1321	0	0.69548	0.12402	0.12527	0.598044	461	1	0.69548
NonTargeting_Human_0618	1	0.87607	0.87578	0.999997	1322	0	0.78871	0.12393	0.12518	0.598044	460	1	0.78871
NonTargeting_Human_0068	1	0.87615	0.87587	0.999997	1323	0	0.42041	0.12385	0.1251	0.598044	459	1	0.42041
NonTargeting_Human_0544	1	0.87623	0.87596	0.999997	1324	0	0.6765	0.12377	0.12501	0.598044	458	1	0.6765
GOLGA6A	15	0.87767	0.96166	0.999997	1325	3	-0.11765	0.74909	0.92419	0.999997	1496	3	-0.11765
ABCG5	15	0.87848	0.96187	0.999997	1326	3	0.29763	0.024808	0.11761	0.587675	189	9	0.29763
NXF2	14	0.87878	0.95891	0.999997	1327	3	0.085273	0.16638	0.4404	0.778392	560	2	0.085273
NonTargeting_Human_0573	1	0.87894	0.87869	0.999997	1328	0	0.66365	0.12106	0.12226	0.591721	457	1	0.66365
NonTargeting_Human_0801	1	0.87935	0.87912	0.999997	1329	0	0.75961	0.12065	0.12187	0.591468	456	1	0.75961
NonTargeting_Human_0466	1	0.87967	0.87951	0.999997	1330	0	0.90876	0.12033	0.12155	0.591468	455	1	0.90876
NonTargeting_Human_0951	1	0.88082	0.88063	0.999997	1331	0	0.97232	0.11918	0.12042	0.587675	454	1	0.97232
NonTargeting_Human_0673	1	0.88115	0.88107	0.999997	1332	0	0.65682	0.11885	0.12009	0.587675	452	1	0.65682
NonTargeting_Human_0624	1	0.88181	0.88177	0.999997	1333	0	1.0605	0.11819	0.11943	0.587675	451	1	1.0605
NonTargeting_Human_0227	1	0.88197	0.88198	0.999997	1334	0	0.79546	0.11803	0.11928	0.587675	450	1	0.79546
IRS2	15	0.88219	0.96304	0.999997	1335	2	0.37564	0.0061054	0.037476	0.423603	102	9	0.37564
NonTargeting_Human_0569	1	0.88238	0.88233	0.999997	1336	0	0.99272	0.11762	0.11886	0.587675	448	1	0.99272
NonTargeting_Human_0198	1	0.88279	0.88275	0.999997	1337	0	0.56706	0.11721	0.11841	0.587675	446	1	0.56706
NonTargeting_Human_0471	1	0.88312	0.88302	0.999997	1338	0	0.58329	0.11688	0.11805	0.587675	445	1	0.58329
NonTargeting_Human_0031	1	0.88336	0.88321	0.999997	1339	0	0.79266	0.11664	0.11777	0.587675	444	1	0.79266
NonTargeting_Human_0170	1	0.88451	0.88444	0.999997	1340	0	0.90103	0.11549	0.11666	0.587675	442	1	0.90103
NonTargeting_Human_0854	1	0.88459	0.88452	0.999997	1341	0	0.90948	0.11541	0.11659	0.587675	441	1	0.90948
NonTargeting_Human_0077	1	0.88476	0.88472	0.999997	1342	0	0.53706	0.11524	0.11647	0.587675	440	1	0.53706
NonTargeting_Human_0461	1	0.88509	0.88507	0.999997	1343	0	0.52182	0.11491	0.11616	0.587675	439	1	0.52182
NonTargeting_Human_0492	1	0.88607	0.88632	0.999997	1344	0	0.58239	0.11393	0.11511	0.587675	438	1	0.58239
PDHX	15	0.88676	0.96455	0.999997	1345	2	0.33325	0.064236	0.23958	0.689777	297	8	0.33325
SUSD5	15	0.88725	0.96472	0.999997	1346	1	0.31861	0.015799	0.082715	0.550352	151	10	0.31861
FAM104A	15	0.88725	0.96472	0.999997	1347	3	0.30591	0.016185	0.08441	0.550352	153	10	0.30591
NonTargeting_Human_0588	1	0.88755	0.88776	0.999997	1348	0	0.79432	0.11245	0.11369	0.584115	436	1	0.79432
NonTargeting_Human_0489	1	0.88763	0.88787	0.999997	1349	0	0.77284	0.11237	0.1136	0.584115	435	1	0.77284
NonTargeting_Human_0024	1	0.88796	0.88817	0.999997	1350	0	0.80916	0.11204	0.11333	0.584115	434	1	0.80916
NonTargeting_Human_0286	1	0.88837	0.88858	0.999997	1351	0	0.70886	0.11163	0.11295	0.584115	432	1	0.70886
C10orf53	15	0.88868	0.96517	0.999997	1352	2	0.22707	0.24228	0.5561	0.836421	734	6	0.22707
NonTargeting_Human_0541	1	0.88968	0.88987	0.999997	1353	0	0.64148	0.11032	0.11165	0.582169	430	1	0.64148
DCAKD	15	0.89002	0.96565	0.999997	1354	3	0.065134	0.28656	0.61353	0.879734	820	6	0.065134
IL17RA	15	0.89017	0.9657	0.999997	1355	2	0.19957	0.14523	0.41501	0.771007	510	6	0.19957
CDC14A	15	0.89077	0.96593	0.999997	1356	3	0.38972	0.016895	0.087614	0.554015	158	10	0.38972
NonTargeting_Human_0717	1	0.89082	0.891	0.999997	1357	0	0.70481	0.10918	0.1106	0.578439	429	1	0.70481
ELF4	15	0.89135	0.96613	0.999997	1358	1	0.52627	0.0023881	0.016527	0.335211	72	10	0.52627
NonTargeting_Human_0300	1	0.8914	0.89165	0.999997	1359	0	0.86911	0.1086	0.10995	0.576733	427	1	0.86911
NonTargeting_Human_0398	1	0.89173	0.89196	0.999997	1360	0	0.69004	0.10827	0.10955	0.576383	426	1	0.69004
NonTargeting_Human_0488	1	0.8923	0.89251	0.999997	1361	0	0.56017	0.1077	0.10896	0.576383	425	1	0.56017
NonTargeting_Human_0713	1	0.89246	0.89271	0.999997	1362	0	0.87351	0.10754	0.1088	0.576383	424	1	0.87351
NonTargeting_Human_0400	1	0.89287	0.8931	0.999997	1363	0	0.70381	0.10713	0.10836	0.576383	423	1	0.70381
NonTargeting_Human_0007	1	0.89312	0.89336	0.999997	1364	0	0.81606	0.10688	0.10809	0.576383	422	1	0.81606
NonTargeting_Human_0448	1	0.89427	0.89456	0.999997	1365	0	0.77959	0.10573	0.10694	0.576383	421	1	0.77959
NonTargeting_Human_0701	1	0.89484	0.89514	0.999997	1366	0	0.61398	0.10516	0.10631	0.574884	420	1	0.61398
NonTargeting_Human_0465	1	0.89501	0.89529	0.999997	1367	0	0.68445	0.10499	0.10615	0.574884	419	1	0.68445
NonTargeting_Human_0838	1	0.89509	0.89538	0.999997	1368	0	0.94995	0.10491	0.10608	0.574884	418	1	0.94995
NonTargeting_Human_0724	1	0.8955	0.89583	0.999997	1369	0	1.1242	0.1045	0.10569	0.574884	416	1	1.1242
TBXAS1	15	0.89566	0.9674	0.999997	1370	2	0.353	0.01786	0.091672	0.557154	162	7	0.353
ZFR	15	0.89659	0.96766	0.999997	1371	3	0.32783	0.068604	0.24996	0.700273	309	8	0.32783
AKAP9	15	0.89679	0.96771	0.999997	1372	2	0.42726	0.0043069	0.028123	0.387971	88	11	0.42726
NonTargeting_Human_0691	1	0.89689	0.89718	0.999997	1373	0	0.71576	0.10311	0.10428	0.572721	413	1	0.71576
NonTargeting_Human_0282	1	0.89697	0.89727	0.999997	1374	0	0.665	0.10303	0.10418	0.572721	412	1	0.665
NonTargeting_Human_0824	1	0.89747	0.89773	0.999997	1375	0	0.87798	0.10253	0.1037	0.572721	410	1	0.87798
NonTargeting_Human_0808	1	0.89755	0.89782	0.999997	1376	0	0.877	0.10245	0.10358	0.572721	408	1	0.877
NonTargeting_Human_0809	1	0.89779	0.89809	0.999997	1377	0	1.0649	0.10221	0.10334	0.572721	407	1	1.0649
NonTargeting_Human_0733	1	0.8982	0.89852	0.999997	1378	0	0.91132	0.1018	0.10297	0.572721	406	1	0.91132
NonTargeting_Human_0393	1	0.89829	0.89859	0.999997	1379	0	0.74112	0.10171	0.10286	0.572721	405	1	0.74112
CNOT2	15	0.90022	0.96877	0.999997	1380	3	0.27785	0.22874	0.53793	0.822391	708	7	0.27785
NonTargeting_Human_0527	1	0.90132	0.90182	0.999997	1381	0	0.56989	0.09868	0.099657	0.559612	400	1	0.56989
NonTargeting_Human_0944	1	0.90157	0.90207	0.999997	1382	0	0.58256	0.098434	0.099357	0.559612	399	1	0.58256
CCL14	15	0.90202	0.96946	0.999997	1383	2	0.4933	0.0033542	0.022337	0.3687	79	10	0.4933
NonTargeting_Human_0585	1	0.90222	0.90271	0.999997	1384	0	0.68363	0.097778	0.098583	0.557154	397	1	0.68363
NonTargeting_Human_0658	1	0.9023	0.90278	0.999997	1385	0	1.3099	0.097696	0.098538	0.557154	396	1	1.3099
NonTargeting_Human_0154	1	0.90255	0.90299	0.999997	1386	0	0.88568	0.09745	0.098295	0.557154	394	1	0.88568
KCNK12	15	0.90261	0.9697	0.999997	1387	3	0.098086	0.63017	0.87139	0.999997	1376	5	0.098086
NonTargeting_Human_0693	1	0.90288	0.90328	0.999997	1388	0	0.77588	0.097122	0.097916	0.557154	393	1	0.77588
AIM1	15	0.90307	0.96985	0.999997	1389	3	0.32213	0.056339	0.2188	0.680057	271	8	0.32213
NonTargeting_Human_0610	1	0.90321	0.90363	0.999997	1390	0	0.82255	0.096794	0.097577	0.557154	390	1	0.82255
NonTargeting_Human_0674	1	0.90345	0.90385	0.999997	1391	0	0.6617	0.096548	0.097334	0.557154	388	1	0.6617
NonTargeting_Human_0210	1	0.90362	0.904	0.999997	1392	0	0.6742	0.096384	0.097159	0.557154	387	1	0.6742
DNAJC18	15	0.90374	0.97007	0.999997	1393	3	0.11106	0.27533	0.59924	0.873441	798	6	0.11106
NonTargeting_Human_0784	1	0.90394	0.90437	0.999997	1394	0	0.86222	0.096056	0.096854	0.557154	386	1	0.86222
NonTargeting_Human_0277	1	0.90403	0.90442	0.999997	1395	0	0.67516	0.095974	0.096775	0.557154	385	1	0.67516
NonTargeting_Human_0871	1	0.90444	0.90478	0.999997	1396	0	0.60027	0.095564	0.096447	0.557154	384	1	0.60027
NonTargeting_Human_0175	1	0.90452	0.90484	0.999997	1397	0	0.78561	0.095482	0.096385	0.557154	383	1	0.78561
AGAP4	15	0.90462	0.97036	0.999997	1398	2	0.30324	0.083876	0.28556	0.716356	349	8	0.30324
NonTargeting_Human_0645	1	0.90468	0.90498	0.999997	1399	0	0.58875	0.095318	0.096249	0.557154	382	1	0.58875
NonTargeting_Human_0053	1	0.90476	0.90512	0.999997	1400	0	0.77883	0.095236	0.096181	0.557154	381	1	0.77883
SERPINB5	15	0.90508	0.97057	0.999997	1401	3	0.21707	0.1178	0.35974	0.739759	449	8	0.21707
NonTargeting_Human_0013	1	0.90542	0.90575	0.999997	1402	0	0.66879	0.09458	0.095486	0.557154	379	1	0.66879
NonTargeting_Human_0655	1	0.90567	0.90601	0.999997	1403	0	0.90147	0.094334	0.095181	0.557154	378	1	0.90147
NonTargeting_Human_0263	1	0.90624	0.90658	0.999997	1404	0	0.70191	0.09376	0.094548	0.557154	375	1	0.70191
NonTargeting_Human_0421	1	0.90755	0.90789	0.999997	1405	0	0.67099	0.092448	0.093209	0.557154	374	1	0.67099
NonTargeting_Human_0612	1	0.90772	0.9081	0.999997	1406	0	1.0238	0.092284	0.093051	0.557154	373	1	1.0238
NonTargeting_Human_0972	1	0.90845	0.90883	0.999997	1407	0	0.89464	0.091546	0.092248	0.557154	372	1	0.89464
NonTargeting_Human_0511	1	0.90878	0.90916	0.999997	1408	0	0.90942	0.091218	0.091915	0.557154	371	1	0.90942
NonTargeting_Human_0555	1	0.90895	0.90933	0.999997	1409	0	0.68964	0.091054	0.091745	0.557154	369	1	0.68964
MRPS31	15	0.909	0.97198	0.999997	1410	3	0.13212	0.11082	0.34524	0.739433	431	6	0.13212
NonTargeting_Human_0475	1	0.90936	0.90971	0.999997	1411	0	0.908	0.090644	0.091321	0.557154	368	1	0.908
TMEM253	15	0.90958	0.97218	0.999997	1412	1	0.61727	8.1356e-05	0.00078835	0.047627	29	12	0.61727
NonTargeting_Human_0540	1	0.91001	0.91031	0.999997	1413	0	0.65348	0.089989	0.090655	0.557154	366	1	0.65348
INO80D	15	0.91059	0.9726	0.999997	1414	3	0.14652	0.62839	0.87045	0.999997	1372	5	0.14652
NonTargeting_Human_0966	1	0.91108	0.91136	0.999997	1415	0	0.91838	0.088923	0.08953	0.554263	363	1	0.91838
NonTargeting_Human_0598	1	0.91116	0.91144	0.999997	1416	0	0.82367	0.088841	0.089456	0.554263	362	1	0.82367
NonTargeting_Human_0374	1	0.91182	0.91202	0.999997	1417	0	0.69769	0.088185	0.088857	0.554015	361	1	0.69769
NonTargeting_Human_0636	1	0.91206	0.9123	0.999997	1418	0	1.0279	0.087939	0.088643	0.554015	360	1	1.0279
NonTargeting_Human_0502	1	0.91231	0.91261	0.999997	1419	0	0.58101	0.087693	0.088434	0.554015	359	1	0.58101
STXBP5L	15	0.91237	0.97328	0.999997	1420	3	0.33751	0.12447	0.37379	0.751198	463	8	0.33751
MTFP1	15	0.91266	0.97335	0.999997	1421	1	0.46897	0.016639	0.086388	0.554015	157	9	0.46897
NonTargeting_Human_0361	1	0.91272	0.91305	0.999997	1422	0	0.75698	0.087283	0.087993	0.554015	358	1	0.75698
NonTargeting_Human_0811	1	0.91305	0.91337	0.999997	1423	0	1.2793	0.086955	0.087609	0.554015	357	1	1.2793
NonTargeting_Human_0042	1	0.91378	0.91406	0.999997	1424	0	0.93395	0.086217	0.086987	0.554015	355	1	0.93395
NonTargeting_Human_0487	1	0.91387	0.91411	0.999997	1425	0	0.73098	0.086135	0.086908	0.554015	354	1	0.73098
COG5	14	0.91424	0.97094	0.999997	1426	1	0.034009	0.33282	0.65034	0.902949	916	6	0.034009
TMEM87B	15	0.91505	0.97422	0.999997	1427	2	0.34075	0.097965	0.31757	0.724803	398	8	0.34075
NonTargeting_Human_0155	1	0.91551	0.91567	0.999997	1428	0	0.68524	0.084495	0.085427	0.554015	351	1	0.68524
SERPINA1	15	0.91595	0.97449	0.999997	1429	3	0.34409	0.032763	0.14491	0.62227	214	8	0.34409
FER	15	0.91605	0.97454	0.999997	1430	3	0.19503	0.16163	0.44207	0.778392	547	6	0.19503
SMARCB1	15	0.91613	0.97458	0.999997	1431	1	0.38747	0.0030704	0.020703	0.361719	76	10	0.38747
NonTargeting_Human_0373	1	0.91649	0.91673	0.999997	1432	0	0.63496	0.083511	0.0845	0.550352	348	1	0.63496
NonTargeting_Human_0689	1	0.91673	0.91696	0.999997	1433	0	1.0146	0.083265	0.084252	0.550352	347	1	1.0146
NonTargeting_Human_0464	1	0.91706	0.91741	0.999997	1434	0	0.97924	0.082937	0.083913	0.550352	346	1	0.97924
LGR5	15	0.91715	0.97484	0.999997	1435	3	0.14235	0.32899	0.65636	0.905461	904	6	0.14235
NonTargeting_Human_0117	1	0.91723	0.91763	0.999997	1436	0	0.8491	0.082773	0.08372	0.550352	345	1	0.8491
OR5AR1	15	0.91774	0.97504	0.999997	1437	3	0.39177	0.014453	0.076769	0.546739	145	10	0.39177
WNT3A	15	0.91782	0.97505	0.999997	1438	2	0.42827	0.009476	0.053916	0.493331	117	10	0.42827
NonTargeting_Human_0182	1	0.91846	0.91877	0.999997	1439	0	0.86789	0.081543	0.082579	0.550352	344	1	0.86789
GINS2	15	0.91853	0.97531	0.999997	1440	2	0.25731	0.078435	0.27309	0.708992	335	6	0.25731
NonTargeting_Human_0744	1	0.91862	0.9189	0.999997	1441	0	0.59214	0.081379	0.082409	0.550352	343	1	0.59214
NonTargeting_Human_0652	1	0.91952	0.91981	0.999997	1442	0	0.82969	0.080477	0.081403	0.550352	342	1	0.82969
NonTargeting_Human_0186	1	0.91977	0.92006	0.999997	1443	0	0.99758	0.080231	0.081183	0.550352	341	1	0.99758
NARF	15	0.92018	0.97588	0.999997	1444	2	0.11544	0.097575	0.31675	0.724803	395	7	0.11544
NonTargeting_Human_0046	1	0.92018	0.92044	0.999997	1445	0	1.0373	0.079821	0.080765	0.550352	340	1	1.0373
NonTargeting_Human_0367	1	0.92083	0.9211	0.999997	1446	0	0.87074	0.079165	0.080002	0.550352	339	1	0.87074
NonTargeting_Human_0004	1	0.92092	0.92121	0.999997	1447	0	0.71616	0.079083	0.07994	0.550352	338	1	0.71616
NonTargeting_Human_0661	1	0.92108	0.92134	0.999997	1448	0	0.75671	0.078919	0.079787	0.550352	337	1	0.75671
NonTargeting_Human_0072	1	0.92149	0.92173	0.999997	1449	0	1.081	0.078509	0.079375	0.550352	336	1	1.081
COG2	15	0.92235	0.97657	0.999997	1450	2	0.22604	0.44239	0.75452	0.96632	1116	6	0.22604
NonTargeting_Human_0998	1	0.92239	0.92263	0.999997	1451	0	0.77292	0.077607	0.078533	0.550352	334	1	0.77292
TADA2A	15	0.92247	0.97661	0.999997	1452	1	0.68001	0.0018453	0.01321	0.308581	65	11	0.68001
GSK3B	15	0.92293	0.9768	0.999997	1453	3	-0.023455	0.29106	0.61883	0.882885	832	4	-0.023455
STOML3	15	0.92318	0.97691	0.999997	1454	2	0.23534	0.11196	0.34768	0.739553	433	7	0.23534
NonTargeting_Human_0176	1	0.92338	0.92364	0.999997	1455	0	0.66485	0.076623	0.077476	0.547329	332	1	0.66485
NonTargeting_Human_0442	1	0.9237	0.924	0.999997	1456	0	0.88283	0.076296	0.07708	0.546739	331	1	0.88283
NonTargeting_Human_0960	1	0.92395	0.9243	0.999997	1457	0	0.97662	0.07605	0.076882	0.546739	330	1	0.97662
ORMDL3	15	0.92514	0.97772	0.999997	1458	1	0.54247	0.014284	0.076029	0.545914	144	8	0.54247
SORT1	15	0.92543	0.9778	0.999997	1459	3	-0.084718	0.51695	0.80993	0.99439	1250	5	-0.084718
LYZ	15	0.9257	0.9779	0.999997	1460	3	0.11708	0.36409	0.68749	0.921561	982	6	0.11708
NonTargeting_Human_0239	1	0.926	0.92623	0.999997	1461	0	0.76086	0.074	0.074707	0.538626	326	1	0.76086
NonTargeting_Human_0546	1	0.92625	0.92646	0.999997	1462	0	0.69549	0.073754	0.074418	0.538626	325	1	0.69549
NonTargeting_Human_0910	1	0.92649	0.92666	0.999997	1463	0	0.80499	0.073508	0.074204	0.538626	323	1	0.80499
NonTargeting_Human_0258	1	0.92698	0.92715	0.999997	1464	0	0.846	0.073016	0.073712	0.538098	322	1	0.846
NonTargeting_Human_0686	1	0.92944	0.9295	0.999997	1465	0	0.8527	0.070556	0.071226	0.52799	317	1	0.8527
NonTargeting_Human_0749	1	0.92953	0.92958	0.999997	1466	0	0.96171	0.070474	0.071146	0.52799	316	1	0.96171
NonTargeting_Human_0990	1	0.93018	0.93015	0.999997	1467	0	0.92398	0.069818	0.070378	0.526932	314	1	0.92398
SPINT1	15	0.93055	0.97882	0.999997	1468	2	0.19667	0.23591	0.54759	0.82948	723	7	0.19667
NonTargeting_Human_0480	1	0.931	0.93096	0.999997	1469	0	0.62828	0.068998	0.069485	0.522479	311	1	0.62828
COX5B	15	0.93127	0.97896	0.999997	1470	2	0.30696	0.0086481	0.049977	0.478467	113	8	0.30696
NonTargeting_Human_0126	1	0.93133	0.93129	0.999997	1471	0	0.85889	0.06867	0.069191	0.522479	310	1	0.85889
NonTargeting_Human_0153	1	0.93149	0.93145	0.999997	1472	0	0.69452	0.068506	0.069022	0.522479	307	1	0.69452
ZFP3	15	0.93224	0.97917	0.999997	1473	1	0.46641	0.0039876	0.026151	0.385205	83	11	0.46641
NonTargeting_Human_0887	1	0.9324	0.93234	0.999997	1474	0	0.76991	0.067604	0.068134	0.522479	306	1	0.76991
NonTargeting_Human_0942	1	0.93256	0.93249	0.999997	1475	0	0.73826	0.06744	0.067976	0.522479	305	1	0.73826
NonTargeting_Human_0894	1	0.93371	0.93354	0.999997	1476	0	0.81429	0.066292	0.067032	0.519649	302	1	0.81429
NonTargeting_Human_0402	1	0.93412	0.93398	0.999997	1477	0	0.93289	0.065882	0.066529	0.518042	301	1	0.93289
NonTargeting_Human_0776	1	0.93436	0.93417	0.999997	1478	0	0.67506	0.065636	0.066202	0.517791	300	1	0.67506
SPRN	15	0.93508	0.97966	0.999997	1479	1	0.33531	0.018544	0.094814	0.557154	166	10	0.33531
TBX1	15	0.93527	0.97969	0.999997	1480	1	0.45022	0.0054083	0.033893	0.413579	97	9	0.45022
NonTargeting_Human_0074	1	0.93543	0.93519	0.999997	1481	0	0.91338	0.06457	0.065207	0.512299	299	1	0.91338
NonTargeting_Human_0523	1	0.93551	0.93528	0.999997	1482	0	1.26	0.064488	0.065083	0.512299	298	1	1.26
ZNRF3	15	0.93565	0.97974	0.999997	1483	2	0.4526	0.0022209	0.015352	0.320545	70	9	0.4526
NonTargeting_Human_0021	1	0.93797	0.93773	0.999997	1484	0	0.78188	0.062029	0.062568	0.502839	289	1	0.78188
NonTargeting_Human_0159	1	0.93846	0.93822	0.999997	1485	0	1.3475	0.061537	0.062093	0.501323	288	1	1.3475
BATF	15	0.93861	0.98039	0.999997	1486	2	0.389	0.029908	0.13505	0.607172	207	9	0.389
C7orf26	15	0.93909	0.98046	0.999997	1487	2	0.3967	0.010985	0.061082	0.500995	128	10	0.3967
NonTargeting_Human_0869	1	0.93945	0.93916	0.999997	1488	0	1.136	0.060553	0.061195	0.500995	287	1	1.136
NonTargeting_Human_0272	1	0.93953	0.93924	0.999997	1489	0	0.93509	0.060471	0.061132	0.500995	286	1	0.93509
NonTargeting_Human_0737	1	0.94019	0.93986	0.999997	1490	0	1.0147	0.059815	0.060454	0.500995	283	1	1.0147
NonTargeting_Human_0936	1	0.9406	0.94029	0.999997	1491	0	1.1207	0.059405	0.059991	0.500495	282	1	1.1207
NonTargeting_Human_0635	1	0.94109	0.94081	0.999997	1492	0	1.7022	0.058913	0.05946	0.498437	281	1	1.7022
NonTargeting_Human_0288	1	0.94125	0.94102	0.999997	1493	0	0.76283	0.058749	0.059324	0.498437	280	1	0.76283
NonTargeting_Human_0310	1	0.94166	0.94143	0.999997	1494	0	1.1749	0.058339	0.058889	0.498437	279	1	1.1749
NonTargeting_Human_0812	1	0.94207	0.94193	0.999997	1495	0	1.3933	0.057929	0.058482	0.498437	278	1	1.3933
NonTargeting_Human_0646	1	0.94215	0.94199	0.999997	1496	0	0.90842	0.057847	0.058408	0.498437	277	1	0.90842
NonTargeting_Human_0346	1	0.94232	0.94213	0.999997	1497	0	0.82299	0.057683	0.058205	0.498437	276	1	0.82299
NonTargeting_Human_0711	1	0.94248	0.94225	0.999997	1498	0	0.9188	0.057519	0.058103	0.498437	274	1	0.9188
WDR33	15	0.94276	0.9811	0.999997	1499	2	0.26433	0.069581	0.25248	0.700273	312	7	0.26433
CAPZA1	15	0.94279	0.98111	0.999997	1500	2	0.43893	0.00073117	0.0060214	0.202875	51	12	0.43893
NonTargeting_Human_0447	1	0.94297	0.94267	0.999997	1501	0	0.92265	0.057027	0.057578	0.498437	273	1	0.92265
NonTargeting_Human_0343	1	0.94371	0.94328	0.999997	1502	0	1.2112	0.056289	0.056815	0.498437	270	1	1.2112
NonTargeting_Human_0451	1	0.94388	0.94347	0.999997	1503	0	0.98999	0.056125	0.056623	0.498437	269	1	0.98999
NonTargeting_Human_0246	1	0.94396	0.94359	0.999997	1504	0	1.2228	0.056043	0.056532	0.498437	268	1	1.2228
CCT6B	15	0.94407	0.98137	0.999997	1505	2	0.44849	0.0042994	0.028061	0.387971	87	9	0.44849
MID1	15	0.94504	0.98153	0.999997	1506	2	0.403	0.00060258	0.0051003	0.178713	49	12	0.403
TMEM183A	15	0.94533	0.98156	0.999997	1507	2	0.20936	0.015662	0.082172	0.550352	149	7	0.20936
NonTargeting_Human_0836	1	0.94617	0.94579	0.999997	1508	0	1.61	0.053829	0.054345	0.493331	263	1	1.61
NonTargeting_Human_0140	1	0.94625	0.94589	0.999997	1509	0	0.69962	0.053747	0.054266	0.493331	262	1	0.69962
NonTargeting_Human_0594	1	0.94691	0.94656	0.999997	1510	0	1.1417	0.053091	0.053548	0.493331	259	1	1.1417
SSH3	15	0.94693	0.98182	0.999997	1511	2	0.035672	0.22564	0.53377	0.818882	703	4	0.035672
NonTargeting_Human_0089	1	0.94814	0.94779	0.999997	1512	0	0.69045	0.051861	0.052514	0.492005	257	1	0.69045
ANKHD1-EIF4EBP3	15	0.94834	0.98226	0.999997	1513	2	0.19081	0.49126	0.79373	0.990025	1200	5	0.19081
FRY	15	0.94883	0.98238	0.999997	1514	2	0.33596	0.0090089	0.051554	0.485601	115	8	0.33596
NonTargeting_Human_0119	1	0.94912	0.9488	0.999997	1515	0	0.83936	0.050877	0.051554	0.485601	255	1	0.83936
NonTargeting_Human_0028	1	0.94929	0.94899	0.999997	1516	0	0.82234	0.050713	0.051367	0.485601	254	1	0.82234
TNFRSF4	15	0.95057	0.98284	0.999997	1517	1	0.49868	0.00055425	0.0047216	0.172339	47	12	0.49868
NonTargeting_Human_0378	1	0.95093	0.95064	0.999997	1518	0	1.0194	0.049073	0.04979	0.478467	253	1	1.0194
FBXL8	15	0.95101	0.98294	0.999997	1519	2	0.34434	0.0067157	0.040471	0.431173	104	10	0.34434
NonTargeting_Human_0278	1	0.95117	0.95088	0.999997	1520	0	0.90502	0.048827	0.049491	0.478467	252	1	0.90502
NonTargeting_Human_0148	1	0.95125	0.95095	0.999997	1521	0	0.84095	0.048745	0.049406	0.478467	251	1	0.84095
NonTargeting_Human_0947	1	0.95158	0.9513	0.999997	1522	0	1.4221	0.048418	0.048977	0.478467	250	1	1.4221
FAM134C	15	0.952	0.98315	0.999997	1523	2	0.47278	0.0020003	0.014024	0.311696	67	10	0.47278
NonTargeting_Human_0111	1	0.95257	0.95231	0.999997	1524	0	0.77184	0.047434	0.047988	0.474996	248	1	0.77184
NonTargeting_Human_0999	1	0.95306	0.95273	0.999997	1525	0	1.1162	0.046942	0.047411	0.471957	246	1	1.1162
hsa-mir-1229	15	0.9536	0.98356	0.999997	1526	1	0.036685	0.070422	0.25438	0.700273	315	5	0.036685
NonTargeting_Human_0029	1	0.95445	0.95409	0.999997	1527	0	1.0136	0.045548	0.046027	0.46344	245	1	1.0136
SLC35F5	15	0.95525	0.98397	0.999997	1528	2	0.36605	0.029001	0.1321	0.607172	202	9	0.36605
RAB5C	15	0.95545	0.98404	0.999997	1529	2	0.30446	0.0060611	0.037211	0.423332	101	10	0.30446
NonTargeting_Human_0930	1	0.95568	0.95527	0.999997	1530	0	0.88504	0.044318	0.044812	0.456453	242	1	0.88504
NFRKB	15	0.95671	0.9844	0.999997	1531	2	0.30691	0.0050761	0.032249	0.403571	95	8	0.30691
NonTargeting_Human_0765	1	0.95708	0.95687	0.999997	1532	0	0.94684	0.042924	0.043382	0.447088	240	1	0.94684
ZNF22	15	0.95795	0.98476	0.999997	1533	2	0.27485	0.016551	0.086037	0.554015	155	10	0.27485
NonTargeting_Human_0961	1	0.95814	0.95791	0.999997	1534	0	1.3798	0.041858	0.042218	0.44027	238	1	1.3798
NonTargeting_Human_0512	1	0.95831	0.95809	0.999997	1535	0	1.2629	0.041694	0.042088	0.44027	237	1	1.2629
MYOZ3	15	0.95927	0.98508	0.999997	1536	2	0.33496	0.031636	0.1411	0.618032	212	8	0.33496
ORMDL1	15	0.9595	0.98513	0.999997	1537	2	0.24311	0.11739	0.35895	0.739759	447	8	0.24311
NonTargeting_Human_0692	1	0.96003	0.95979	0.999997	1538	0	1.0008	0.039972	0.040223	0.431173	235	1	1.0008
NonTargeting_Human_0045	1	0.96044	0.96023	0.999997	1539	0	0.99385	0.039562	0.039884	0.431173	234	1	0.99385
NonTargeting_Human_0653	1	0.96085	0.96075	0.999997	1540	0	1.0365	0.039152	0.039494	0.429771	233	1	1.0365
NonTargeting_Human_0484	1	0.96101	0.96093	0.999997	1541	0	1.083	0.038988	0.039313	0.429771	232	1	1.083
NonTargeting_Human_0344	1	0.96134	0.96131	0.999997	1542	0	1.1403	0.03866	0.038951	0.429199	230	1	1.1403
FAM126A	15	0.9615	0.98573	0.999997	1543	2	0.050695	0.49653	0.79814	0.991732	1210	6	0.050695
NonTargeting_Human_0332	1	0.96159	0.96157	0.999997	1544	0	1.0305	0.038414	0.038731	0.429199	229	1	1.0305
NonTargeting_Human_0898	1	0.96224	0.96221	0.999997	1545	0	1.4418	0.037758	0.038115	0.425333	227	1	1.4418
ANKRD36	15	0.96266	0.98601	0.999997	1546	2	0.60312	0.0094967	0.053984	0.493331	118	8	0.60312
PITPNM2	15	0.96306	0.98614	0.999997	1547	1	0.41862	0.0034093	0.022608	0.3687	80	11	0.41862
NonTargeting_Human_0667	1	0.96306	0.96298	0.999997	1548	0	1.248	0.036938	0.037205	0.423332	225	1	1.248
NonTargeting_Human_0161	1	0.96331	0.96321	0.999997	1549	0	0.75584	0.036692	0.036911	0.423332	224	1	0.75584
RAB23	15	0.96386	0.98634	0.999997	1550	2	0.42122	0.023652	0.11337	0.584115	184	9	0.42122
USP50	15	0.96412	0.98642	0.999997	1551	1	0.39608	0.06967	0.25267	0.700273	313	8	0.39608
NonTargeting_Human_0879	1	0.96454	0.96449	0.999997	1552	0	0.96431	0.035462	0.035645	0.413579	221	1	0.96431
SPDYE2	15	0.96457	0.98659	0.999997	1553	2	-0.030745	0.1944	0.49029	0.796841	627	3	-0.030745
DCAF4	15	0.96467	0.98661	0.999997	1554	2	0.18239	0.064076	0.23923	0.689777	295	6	0.18239
NonTargeting_Human_0494	1	0.9647	0.96464	0.999997	1555	0	1.2262	0.035298	0.035436	0.413579	219	1	1.2262
hsa-mir-6508	8	0.96505	0.96525	0.999997	1556	0	0.35197	0.12935	0.32953	0.727123	473	5	0.35197
PRELP	15	0.96507	0.98674	0.999997	1557	2	0.23779	0.063427	0.23781	0.689777	293	7	0.23779
NonTargeting_Human_0254	1	0.96536	0.96529	0.999997	1558	0	1.3079	0.034643	0.034741	0.413579	217	1	1.3079
NonTargeting_Human_0177	1	0.96552	0.96541	0.999997	1559	0	1.0574	0.034479	0.034549	0.413579	216	1	1.0574
NonTargeting_Human_0476	1	0.9656	0.9655	0.999997	1560	0	1.3991	0.034397	0.034487	0.413579	215	1	1.3991
EML4	15	0.966	0.98709	0.999997	1561	2	0.44943	0.056009	0.21769	0.680057	267	8	0.44943
PRDM8	15	0.96637	0.98719	0.999997	1562	1	0.135	0.65304	0.88336	0.999997	1402	3	0.135
OR52B2	15	0.96658	0.98726	0.999997	1563	2	0.45217	0.0021905	0.015188	0.320545	69	10	0.45217
ROR1	15	0.96663	0.98728	0.999997	1564	2	0.38614	0.035427	0.15369	0.633861	220	9	0.38614
STAM2	15	0.96668	0.98729	0.999997	1565	1	0.27955	0.07585	0.26723	0.70468	329	7	0.27955
FUNDC2	15	0.96704	0.9874	0.999997	1566	1	0.47863	0.0024064	0.016646	0.335211	73	11	0.47863
MSI2	15	0.96714	0.98742	0.999997	1567	2	0.62764	0.0022827	0.015759	0.324811	71	11	0.62764
TSPAN11	15	0.96738	0.98753	0.999997	1568	2	0.13652	0.029012	0.13216	0.607172	203	7	0.13652
NonTargeting_Human_0566	1	0.96757	0.96756	0.999997	1569	0	1.0498	0.032429	0.032611	0.405203	213	1	1.0498
PSMD9	15	0.96775	0.98763	0.999997	1570	2	0.31372	0.027978	0.12866	0.60597	200	9	0.31372
hsa-mir-6817	13	0.96798	0.98552	0.999997	1571	1	0.15864	0.37267	0.68282	0.920682	996	5	0.15864
NonTargeting_Human_0204	1	0.96839	0.96828	0.999997	1572	0	1.0415	0.031609	0.031729	0.400634	211	1	1.0415
TMEM67	15	0.96844	0.9878	0.999997	1573	2	0.36501	0.012599	0.068377	0.522479	137	10	0.36501
NonTargeting_Human_0855	1	0.96864	0.96855	0.999997	1574	0	0.98532	0.031363	0.031492	0.400634	210	1	0.98532
NonTargeting_Human_0048	1	0.96872	0.96863	0.999997	1575	0	1.3184	0.031281	0.031441	0.400634	209	1	1.3184
NonTargeting_Human_0444	1	0.96921	0.9691	0.999997	1576	0	0.99588	0.030789	0.031	0.400634	208	1	0.99588
TRIM4	15	0.96964	0.98824	0.999997	1577	2	0.22523	0.044959	0.18414	0.668297	243	8	0.22523
NonTargeting_Human_0829	1	0.97011	0.97003	0.999997	1578	0	1.121	0.029887	0.030113	0.394008	206	1	1.121
NonTargeting_Human_0890	1	0.97044	0.97033	0.999997	1579	0	0.88277	0.029559	0.029728	0.394008	204	1	0.88277
NonTargeting_Human_0586	1	0.97126	0.97121	0.999997	1580	0	0.99761	0.028739	0.028881	0.39224	201	1	0.99761
RBM4B	15	0.97144	0.98882	0.999997	1581	2	0.39831	0.10318	0.32884	0.727123	414	7	0.39831
SREBF2	15	0.97185	0.98901	0.999997	1582	2	0.41867	0.0045541	0.029604	0.394008	92	10	0.41867
CUL7	15	0.97212	0.9891	0.999997	1583	1	0.60332	0.00046242	0.0039644	0.160779	43	12	0.60332
NonTargeting_Human_0875	1	0.97224	0.9721	0.999997	1584	0	0.97616	0.027755	0.02796	0.387971	199	1	0.97616
NonTargeting_Human_0734	1	0.97233	0.97219	0.999997	1585	0	1.18	0.027673	0.027903	0.387971	198	1	1.18
RNPEP	15	0.97266	0.98933	0.999997	1586	2	0.2704	0.25915	0.57851	0.857487	765	7	0.2704
hsa-mir-1908	15	0.97278	0.98937	0.999997	1587	2	0.15538	0.060289	0.23016	0.687157	285	7	0.15538
NonTargeting_Human_0299	1	0.97339	0.97314	0.999997	1588	0	1.9104	0.026607	0.026824	0.385205	195	1	1.9104
NonTargeting_Human_1000	1	0.97388	0.97367	0.999997	1589	0	1.0505	0.026115	0.026372	0.385205	194	1	1.0505
BMI1	15	0.9739	0.98971	0.999997	1590	2	0.32864	0.14325	0.41145	0.770127	508	8	0.32864
NUDT5	15	0.97395	0.98971	0.999997	1591	2	0.34025	0.013416	0.072045	0.52817	140	10	0.34025
ZDHHC5	15	0.97399	0.98973	0.999997	1592	2	0.12725	0.38774	0.7081	0.936584	1020	6	0.12725
NonTargeting_Human_0309	1	0.97405	0.97384	0.999997	1593	0	1.1247	0.025951	0.026219	0.385205	193	1	1.1247
PSMD5	15	0.97455	0.98996	0.999997	1594	1	0.35478	0.0097322	0.055125	0.495278	121	10	0.35478
ATP6V1B1	15	0.9749	0.99012	0.999997	1595	1	0.32481	0.00075039	0.006174	0.204091	52	12	0.32481
PDGFA	15	0.97504	0.99019	0.999997	1596	2	0.29758	0.0012069	0.0092144	0.26329	56	8	0.29758
NonTargeting_Human_0786	1	0.97511	0.97482	0.999997	1597	0	1.6059	0.024885	0.025055	0.378414	190	1	1.6059
SYTL3	15	0.97519	0.99022	0.999997	1598	2	0.52868	0.00032055	0.0027663	0.118208	41	11	0.52868
NonTargeting_Human_0329	1	0.97544	0.97519	0.999997	1599	0	1.1543	0.024557	0.024659	0.378414	187	1	1.1543
NonTargeting_Human_0023	1	0.97561	0.97534	0.999997	1600	0	0.9746	0.024393	0.024512	0.378414	186	1	0.9746
ISG15	15	0.97577	0.99041	0.999997	1601	2	0.34642	0.0017772	0.012752	0.306049	63	9	0.34642
TBPL2	15	0.97602	0.99047	0.999997	1602	1	0.38923	0.015695	0.082313	0.550352	150	9	0.38923
NonTargeting_Human_0561	1	0.97659	0.97638	0.999997	1603	0	1.2648	0.023409	0.023653	0.370005	183	1	1.2648
DPY30	15	0.97662	0.99072	0.999997	1604	2	0.15015	0.6316	0.87218	0.999997	1377	5	0.15015
RPL41	7	0.97676	0.9766	0.999997	1605	0	0.27771	0.4992	0.71218	0.938665	1214	3	0.27771
NonTargeting_Human_0463	1	0.97692	0.9768	0.999997	1606	0	1.1485	0.023081	0.023359	0.3687	182	1	1.1485
NonTargeting_Human_0115	1	0.977	0.97689	0.999997	1607	0	1.1293	0.022999	0.023269	0.3687	181	1	1.1293
NonTargeting_Human_0283	1	0.97725	0.97717	0.999997	1608	0	0.86094	0.022753	0.023015	0.3687	180	1	0.86094
NonTargeting_Human_0357	1	0.97749	0.97739	0.999997	1609	0	0.98979	0.022507	0.022732	0.3687	178	1	0.98979
NXF5	15	0.97856	0.99141	0.999997	1610	2	0.15118	0.176	0.46379	0.784233	579	7	0.15118
NonTargeting_Human_0699	1	0.97872	0.97856	0.999997	1611	0	1.1976	0.021277	0.021461	0.361719	174	1	1.1976
NonTargeting_Human_0291	1	0.97913	0.97897	0.999997	1612	0	1.0897	0.020867	0.021031	0.361719	173	1	1.0897
BAGE2	15	0.97944	0.9918	0.999997	1613	1	0.14313	0.28771	0.61505	0.881047	823	7	0.14313
NonTargeting_Human_0091	1	0.97946	0.97923	0.999997	1614	0	1.0886	0.02054	0.02076	0.361719	172	1	1.0886
NonTargeting_Human_0764	1	0.97954	0.97934	0.999997	1615	0	0.96468	0.020458	0.020698	0.361719	171	1	0.96468
PGAP3	15	0.9798	0.99196	0.999997	1616	1	0.64286	0.00014029	0.0013591	0.074412	32	12	0.64286
NonTargeting_Human_0311	1	0.97987	0.97966	0.999997	1617	0	1.2776	0.02013	0.020432	0.361719	170	1	1.2776
CLDND2	15	0.98031	0.99224	0.999997	1618	1	0.27397	0.03712	0.15918	0.639624	226	9	0.27397
C1orf198	15	0.98045	0.9923	0.999997	1619	2	0.27399	0.10251	0.32736	0.727123	409	8	0.27399
CPM	15	0.98048	0.99233	0.999997	1620	2	0.31872	0.083887	0.28559	0.716356	350	8	0.31872
ARL8A	15	0.98059	0.99237	0.999997	1621	1	0.2463	0.047433	0.19141	0.670047	247	9	0.2463
NonTargeting_Human_0296	1	0.98094	0.98077	0.999997	1622	0	1.0576	0.019064	0.019347	0.353084	169	1	1.0576
KRTAP4-2	15	0.98106	0.99253	0.999997	1623	2	0.53523	0.0077154	0.04545	0.460282	109	10	0.53523
PON1	15	0.98112	0.99255	0.999997	1624	2	0.1059	0.35549	0.67973	0.919306	959	6	0.1059
SPI1	15	0.98115	0.99257	0.999997	1625	2	0.50136	0.0016377	0.011825	0.299788	62	11	0.50136
NonTargeting_Human_0206	1	0.98126	0.98111	0.999997	1626	0	1.5817	0.018736	0.018872	0.35013	167	1	1.5817
NonTargeting_Human_0060	1	0.98159	0.98154	0.999997	1627	0	1.047	0.018408	0.018539	0.349249	165	1	1.047
RALB	15	0.98177	0.99279	0.999997	1628	1	0.3032	0.045412	0.18554	0.668297	244	9	0.3032
NonTargeting_Human_0388	1	0.98192	0.98188	0.999997	1629	0	1.1134	0.01808	0.018149	0.34562	164	1	1.1134
NonTargeting_Human_0870	1	0.982	0.98199	0.999997	1630	0	1.474	0.017998	0.01807	0.34562	163	1	1.474
NonTargeting_Human_0980	1	0.98233	0.9824	0.999997	1631	0	1.8588	0.01767	0.017793	0.34562	161	1	1.8588
NonTargeting_Human_0178	1	0.98282	0.98288	0.999997	1632	0	1.0865	0.017178	0.017335	0.34125	159	1	1.0865
TGIF1	15	0.98287	0.99301	0.999997	1633	1	1.0762	2.9187e-10	2.8256e-06	0.00033	8	14	1.0762
KCNU1	15	0.98312	0.99305	0.999997	1634	1	0.36221	0.064211	0.23951	0.689777	296	8	0.36221
NonTargeting_Human_0428	1	0.98454	0.98482	0.999997	1635	0	1.4861	0.015456	0.015369	0.320545	148	1	1.4861
NonTargeting_Human_0387	1	0.98495	0.98515	0.999997	1636	0	1.5962	0.015046	0.014939	0.320545	146	1	1.5962
NonTargeting_Human_0037	1	0.98577	0.98589	0.999997	1637	0	1.2996	0.014226	0.014199	0.311696	143	1	1.2996
NonTargeting_Human_0098	1	0.98586	0.98597	0.999997	1638	0	1.1943	0.014144	0.014086	0.311696	142	1	1.1943
DOCK5	15	0.98712	0.99368	0.999997	1639	1	0.32555	0.024656	0.11701	0.587675	188	9	0.32555
ITGA1	15	0.98721	0.99369	0.999997	1640	1	0.27777	0.12518	0.3752	0.75298	465	8	0.27777
NonTargeting_Human_0509	1	0.98741	0.98759	0.999997	1641	0	1.3775	0.012586	0.01256	0.305624	136	1	1.3775
NonTargeting_Human_0539	1	0.98758	0.98775	0.999997	1642	0	1.8879	0.012422	0.012413	0.305624	135	1	1.8879
AGPAT1	15	0.98776	0.99381	0.999997	1643	1	0.25978	0.010545	0.058974	0.498437	125	10	0.25978
ARPC5L	15	0.98784	0.99382	0.999997	1644	1	0.40084	0.010506	0.058804	0.498437	124	10	0.40084
NonTargeting_Human_0664	1	0.98791	0.98804	0.999997	1645	0	1.1351	0.012094	0.011978	0.299788	134	1	1.1351
COA4	15	0.98881	0.99399	0.999997	1646	1	0.23502	0.0049792	0.031785	0.400634	94	8	0.23502
NonTargeting_Human_0710	1	0.9893	0.98949	0.999997	1647	0	1.8029	0.0107	0.010627	0.273806	127	1	1.8029
NonTargeting_Human_0835	1	0.98938	0.98956	0.999997	1648	0	1.9251	0.010618	0.010548	0.273806	126	1	1.9251
KRTAP13-2	15	0.98958	0.99414	0.999997	1649	1	0.48307	0.011695	0.064212	0.511364	132	9	0.48307
CHRND	15	0.98974	0.99421	0.999997	1650	1	0.41683	0.0046384	0.030135	0.394008	93	11	0.41683
hsa-mir-6831	12	0.98976	0.98997	0.999997	1651	1	0.72308	0.0013436	0.0097682	0.26329	60	8	0.72308
TNFRSF8	15	0.98999	0.99429	0.999997	1652	1	0.43024	0.0045248	0.029395	0.394008	91	10	0.43024
JAK1	15	0.99004	0.9943	0.999997	1653	1	0.43494	0.009472	0.053882	0.493331	116	10	0.43494
NonTargeting_Human_0852	1	0.9902	0.99037	0.999997	1654	0	4.4089	0.0097983	0.0096778	0.26329	122	1	4.4089
NonTargeting_Human_0124	1	0.99028	0.99045	0.999997	1655	0	1.6231	0.0097163	0.0095591	0.26329	120	1	1.6231
CEP97	15	0.99053	0.99445	0.999997	1656	1	0.32382	0.052704	0.20755	0.675055	258	9	0.32382
ZFAND1	15	0.99101	0.99456	0.999997	1657	1	0.33531	0.013297	0.071423	0.52799	139	10	0.33531
NonTargeting_Human_0009	1	0.99102	0.99119	0.999997	1658	0	1.4709	0.0089784	0.0087566	0.26329	114	1	1.4709
RDH14	15	0.99137	0.99468	0.999997	1659	1	0.31133	0.0031949	0.021472	0.361719	78	11	0.31133
EPHA2	15	0.99189	0.99484	0.999997	1660	1	0.92781	1.9189e-11	2.8256e-06	0.00033	7	13	0.92781
NonTargeting_Human_0128	1	0.99192	0.99212	0.999997	1661	0	1.5307	0.0080764	0.0079654	0.251503	111	1	1.5307
WWP1	15	0.99197	0.99487	0.999997	1662	1	0.74079	0.00020729	0.0018677	0.08844	37	10	0.74079
NXPH2	15	0.99204	0.99489	0.999997	1663	1	0.29727	0.063326	0.23759	0.689777	292	8	0.29727
ISG20	15	0.99241	0.99502	0.999997	1664	1	0.16022	0.41777	0.73406	0.952608	1073	6	0.16022
VHL	15	0.99352	0.99538	0.999997	1665	1	0.50957	0.0040862	0.026778	0.385205	85	11	0.50957
TNFAIP3	15	0.99398	0.99551	0.999997	1666	1	0.33187	0.075183	0.26552	0.70468	328	8	0.33187
IREB2	15	0.99402	0.99552	0.999997	1667	1	0.89131	2.9404e-05	0.00026278	0.019183	24	12	0.89131
PTCHD4	15	0.99404	0.99553	0.999997	1668	1	0.20645	0.14093	0.40721	0.769962	497	7	0.20645
CAB39	15	0.99414	0.99557	0.999997	1669	1	1.0441	3.7552e-06	3.1082e-05	0.002593	20	12	1.0441
ABHD14B	15	0.99416	0.99557	0.999997	1670	1	0.49135	0.0083148	0.048327	0.475665	112	10	0.49135
TMOD2	15	0.99457	0.99571	0.999997	1671	1	0.48176	0.0031449	0.021127	0.361719	77	10	0.48176
SQLE	15	0.99489	0.99579	0.999997	1672	1	0.89447	7.3388e-05	0.00071488	0.044731	28	11	0.89447
TCP10	15	0.99547	0.99607	0.999997	1673	1	0.43621	0.00020141	0.0018282	0.08844	35	12	0.43621
KIF3C	15	0.99554	0.99609	0.999997	1674	1	0.45422	0.0024868	0.017115	0.34074	74	11	0.45422
THOC6	15	0.9956	0.99611	0.999997	1675	1	0.12395	0.2144	0.51823	0.812107	675	5	0.12395
NonTargeting_Human_0381	1	0.99561	0.99582	0.999997	1676	0	1.8063	0.0043867	0.0043317	0.166703	89	1	1.8063
SP140	15	0.99576	0.99618	0.999997	1677	1	0.38094	0.013417	0.072051	0.52817	141	9	0.38094
SMOC1	15	0.99614	0.99644	0.999997	1678	1	0.24213	0.234	0.54505	0.82821	719	7	0.24213
LACRT	15	0.99615	0.99646	0.999997	1679	1	0.13027	0.10903	0.34125	0.736077	428	7	0.13027
PPM1A	15	0.9963	0.99654	0.999997	1680	1	0.49631	0.010075	0.056702	0.498437	123	10	0.49631
PRR3	15	0.99672	0.99679	0.999997	1681	1	0.39592	0.02555	0.12022	0.587675	192	8	0.39592
ZNF232	15	0.99698	0.99702	0.999997	1682	1	0.18195	0.12632	0.37766	0.753789	466	8	0.18195
SRGAP2	15	0.99719	0.99718	0.999997	1683	1	0.75891	0.00052821	0.0044956	0.16758	46	11	0.75891
HNRNPM	15	0.99724	0.99721	0.999997	1684	1	0.50217	0.0057041	0.035402	0.413579	99	8	0.50217
MCCC2	15	0.99755	0.99739	0.999997	1685	1	0.52527	0.00047223	0.0040378	0.160779	44	9	0.52527
SOCS1	15	0.99782	0.99762	0.999997	1686	1	0.35944	0.0079306	0.046575	0.46628	110	10	0.35944
VPS13C	15	0.99783	0.99762	0.999997	1687	1	0.43088	0.0018433	0.013204	0.308581	64	9	0.43088
GALR1	15	0.99787	0.99765	0.999997	1688	1	0.34961	0.0075458	0.044557	0.456453	108	9	0.34961
NLRP8	15	0.99788	0.99766	0.999997	1689	1	0.32439	0.053097	0.20871	0.675055	260	8	0.32439
CERS6	15	0.99793	0.99769	0.999997	1690	1	0.79496	0.00010859	0.0010879	0.063531	30	11	0.79496
CDH1	15	0.99808	0.99785	0.999997	1691	0	0.64521	1.4398e-06	1.4128e-05	0.001303	18	13	0.64521
PGM1	15	0.9981	0.99786	0.999997	1692	0	0.58615	0.00015688	0.0014778	0.078458	33	12	0.58615
NSFL1C	15	0.99815	0.99791	0.999997	1693	0	0.42723	0.0057459	0.035617	0.413579	100	9	0.42723
DNAJC4	15	0.99817	0.99795	0.999997	1694	0	0.14203	0.44668	0.7579	0.966796	1123	5	0.14203
MLLT11	15	0.99821	0.998	0.999997	1695	0	0.44911	0.0027897	0.018985	0.35013	75	10	0.44911
WDHD1	15	0.99831	0.99812	0.999997	1696	0	0.67927	0.0002858	0.0025233	0.113354	39	12	0.67927
CCDC43	15	0.99841	0.99822	0.999997	1697	0	0.40256	0.00050802	0.0043769	0.166703	45	12	0.40256
GTDC2	15	0.99846	0.99827	0.999997	1698	0	0.40841	0.00031994	0.0027663	0.118208	40	12	0.40841
RALGAPA2	15	0.9985	0.99835	0.999997	1699	0	0.50264	0.0010158	0.0080389	0.251503	53	11	0.50264
IRS4	15	0.99852	0.99838	0.999997	1700	0	0.59928	0.0012486	0.009463	0.26329	57	9	0.59928
FRYL	15	0.99856	0.99839	0.999997	1701	0	0.55003	0.00018875	0.0017434	0.08844	34	12	0.55003
RALGAPA1	15	0.99863	0.99844	0.999997	1702	0	0.33919	0.15849	0.43715	0.77796	541	7	0.33919
ARHGEF35	15	0.99863	0.99846	0.999997	1703	0	0.34098	0.068509	0.24982	0.700273	308	8	0.34098
GPBP1L1	15	0.99872	0.99857	0.999997	1704	0	0.8007	1.7683e-05	0.00016671	0.012699	23	11	0.8007
CDT1	15	0.99879	0.99865	0.999997	1705	0	0.58887	0.0020379	0.014233	0.311696	68	11	0.58887
SNX19	15	0.99905	0.99892	0.999997	1706	0	0.70716	0.00024147	0.002122	0.097837	38	11	0.70716
NID1	15	0.99915	0.99903	0.999997	1707	0	0.16386	0.094273	0.3094	0.722595	377	6	0.16386
KDM3B	15	0.9992	0.99909	0.999997	1708	0	0.66985	0.00013548	0.0013309	0.074412	31	10	0.66985
NSUN3	15	0.99921	0.9991	0.999997	1709	0	0.56685	0.012637	0.068592	0.522479	138	8	0.56685
B4GALT2	15	0.99921	0.99911	0.999997	1710	0	0.37101	0.027122	0.12563	0.598044	196	9	0.37101
EPB41	15	0.99924	0.99914	0.999997	1711	0	0.43555	0.0037732	0.024919	0.378414	82	11	0.43555
PRR20A	15	0.99933	0.99923	0.999997	1712	0	0.39715	0.072087	0.25821	0.700273	319	8	0.39715
ASB16	15	0.9994	0.99932	0.999997	1713	0	0.44498	0.0014309	0.01048	0.273806	61	11	0.44498
DAZ1	15	0.99943	0.99936	0.999997	1714	0	0.40991	0.0040588	0.026592	0.385205	84	10	0.40991
TSPYL4	15	0.99944	0.99938	0.999997	1715	0	0.42752	3.9854e-06	3.1082e-05	0.002593	21	14	0.42752
PDE1A	15	0.99944	0.9994	0.999997	1716	0	0.43655	0.021937	0.10729	0.576383	176	9	0.43655
RAP1GAP	15	0.99945	0.99942	0.999997	1717	0	0.44368	0.00035295	0.0029641	0.123645	42	12	0.44368
VOPP1	15	0.99946	0.99942	0.999997	1718	0	0.46877	6.9417e-05	0.00067532	0.043821	27	12	0.46877
G6PC	15	0.99959	0.99962	0.999997	1719	0	0.53195	0.0034342	0.022766	0.3687	81	8	0.53195
EFCAB5	15	0.99964	0.99967	0.999997	1720	0	0.55885	0.0010707	0.0083836	0.257686	55	10	0.55885
CHRNA3	15	0.99967	0.99971	0.999997	1721	0	0.48096	0.0068607	0.041172	0.43454	106	10	0.48096
CTRL	15	0.99968	0.99973	0.999997	1722	0	0.29163	0.053256	0.20921	0.675055	261	8	0.29163
TREM1	15	0.99973	0.99977	0.999997	1723	0	0.49805	0.011147	0.061799	0.501261	130	9	0.49805
TMEM30B	15	0.99974	0.99978	0.999997	1724	0	0.25071	0.26517	0.58613	0.863146	777	7	0.25071
hsa-mir-1976	12	0.99976	0.99981	0.999997	1725	0	0.49299	0.0010412	0.0075981	0.246516	54	10	0.49299
PEX6	15	0.99976	0.99982	0.999997	1726	0	0.83236	2.9234e-09	2.8256e-06	0.00033	11	14	0.83236
EGLN2	15	0.99978	0.99983	0.999997	1727	0	0.89748	2.7292e-09	2.8256e-06	0.00033	10	14	0.89748
OR56A1	15	0.9998	0.99984	0.999997	1728	0	0.41963	0.0044282	0.028852	0.39224	90	10	0.41963
MDH1	15	0.99983	0.99989	0.999997	1729	0	0.34999	0.0012729	0.009576	0.26329	58	9	0.34999
DYNLL1	15	0.99984	0.9999	0.999997	1730	0	1.0118	4.3335e-07	8.4769e-06	0.000874	16	11	1.0118
CHP1	15	0.99991	0.99993	0.999997	1731	0	1.4243	1.0544e-20	2.8256e-06	0.00033	2	14	1.4243
KLHDC7B	15	0.99993	0.99994	0.999997	1732	0	0.26034	0.022139	0.10806	0.576383	177	7	0.26034
MBOAT7	15	0.99994	0.99995	0.999997	1733	0	0.68436	0.00020579	0.0018508	0.08844	36	11	0.68436
LSS	15	0.99994	0.99995	0.999997	1734	0	0.7585	4.4962e-07	8.4769e-06	0.000874	17	14	0.7585
ANXA13	15	0.99995	0.99997	0.999997	1735	0	0.34163	0.01178	0.064546	0.511693	133	10	0.34163
CCDC101	15	0.99997	0.99997	0.999997	1736	0	0.53901	0.0006676	0.0055976	0.192293	50	10	0.53901
EGFR	15	0.99998	0.99998	0.999997	1737	0	0.47656	0.00059678	0.0050494	0.178713	48	12	0.47656
LRRC8A	15	0.99998	0.99998	0.999997	1738	0	0.57277	1.7813e-06	1.4128e-05	0.001303	19	13	0.57277
RALGAPB	15	0.99998	0.99998	0.999997	1739	0	0.92643	1.646e-09	2.8256e-06	0.00033	9	13	0.92643
CARM1	15	0.99998	0.99999	0.999997	1740	0	1.4036	7.3662e-14	2.8256e-06	0.00033	4	14	1.4036
IRF2BP2	15	0.99998	0.99999	0.999997	1741	0	1.6195	3.5235e-17	2.8256e-06	0.00033	3	14	1.6195
SIRT5	15	0.99998	0.99999	0.999997	1742	0	0.46656	0.0013048	0.0097512	0.26329	59	11	0.46656
EHD2	15	0.99999	0.99999	0.999997	1743	0	0.51331	6.4251e-05	0.00062446	0.042079	26	13	0.51331
FAM110D	15	0.99999	1	0.999997	1744	0	0.70045	3.9118e-05	0.00037016	0.025941	25	13	0.70045
MLLT1	15	1	1	0.999997	1745	0	0.65255	4.8449e-06	4.2384e-05	0.003375	22	13	0.65255
TFRC	15	1	1	0.999997	1746	0	0.9331	2.334e-08	2.8256e-06	0.00033	12	13	0.9331
AGPAT6	15	1	1	0.999997	1747	0	0.90783	1.7091e-07	2.8256e-06	0.00033	15	12	0.90783
STK40	15	1	1	0.999997	1748	0	1.326	1.6784e-11	2.8256e-06	0.00033	6	15	1.326
HIST1H2BF	15	1	1	0.999997	1749	0	0.93964	3.4678e-08	2.8256e-06	0.00033	14	15	0.93964
TAOK1	15	1	1	0.999997	1750	0	1.0115	2.953e-08	2.8256e-06	0.00033	13	15	1.0115
PDCD10	15	1	1	0.999997	1751	0	1.4249	5.6887e-13	2.8256e-06	0.00033	5	15	1.4249
MYLIP	15	1	1	0.999997	1752	0	2.435	3.8811e-30	2.8256e-06	0.00033	1	15	2.435

## Sheet: LP-depl_gene
id	num	neg|score	neg|p-value	neg|fdr	neg|rank	neg|goodsgrna	neg|lfc	pos|score	pos|p-value	pos|fdr	pos|rank	pos|goodsgrna	pos|lfc
LDLR	15	1.127e-31	2.8256e-06	0.00016	1	15	-4.083	1	1	0.999997	1752	0	-4.083
SCAP	15	7.91e-20	2.8256e-06	0.00016	2	14	-2.5491	0.50375	0.801	0.988972	1231	1	-2.5491
MBTPS1	15	1.0227e-13	2.8256e-06	0.00016	3	13	-2.5847	1	1	0.999997	1740	0	-2.5847
CDIPT	15	6.6646e-13	2.8256e-06	0.00016	4	13	-2.6232	1	1	0.999997	1742	0	-2.6232
CHD7	15	1.1393e-12	2.8256e-06	0.00016	5	15	-1.6959	1	1	0.999997	1751	0	-1.6959
HNF4A	15	2.1578e-11	2.8256e-06	0.00016	6	13	-2.1336	0.40625	0.72337	0.938779	1076	2	-2.1336
CCDC115	15	3.8841e-11	2.8256e-06	0.00016	7	15	-1.3421	1	1	0.999997	1750	0	-1.3421
PRMT1	15	1.5854e-10	2.8256e-06	0.00016	8	14	-2.1888	0.9947	0.99701	0.999997	1681	1	-2.1888
hsa-mir-6886	13	2.0344e-10	2.8256e-06	0.00016	9	12	-2.1011	1	1	0.999997	1745	0	-2.1011
ELOF1	15	2.9596e-10	2.8256e-06	0.00016	10	14	-1.6198	0.99931	0.9992	0.999997	1712	0	-1.6198
STK11	15	3.8829e-10	2.8256e-06	0.00016	11	14	-1.2168	0.9962	0.9974	0.999997	1690	1	-1.2168
FNDC3B	15	4.4024e-10	2.8256e-06	0.00016	12	14	-1.4795	0.99994	0.99995	0.999997	1729	0	-1.4795
USP22	15	4.7944e-10	2.8256e-06	0.00016	13	15	-1.7677	1	1	0.999997	1749	0	-1.7677
TAF2	15	7.4617e-10	2.8256e-06	0.00016	14	15	-1.6384	1	1	0.999997	1748	0	-1.6384
ATP11A	15	9.596e-10	2.8256e-06	0.00016	15	14	-1.0056	1	1	0.999997	1747	0	-1.0056
WDR18	15	3.0186e-09	2.8256e-06	0.00016	16	13	-1.4027	0.93256	0.98135	0.999997	1621	2	-1.4027
TAF8	15	6.138e-09	2.8256e-06	0.00016	17	12	-1.3506	0.94159	0.9839	0.999997	1626	1	-1.3506
ALG2	15	8.4549e-09	2.8256e-06	0.00016	18	14	-1.6432	0.99877	0.99865	0.999997	1702	1	-1.6432
PIK3C3	15	1.2345e-08	2.8256e-06	0.00016	19	11	-1.7593	0.13947	0.40422	0.761456	517	1	-1.7593
AP2M1	15	2.1253e-08	2.8256e-06	0.00016	20	14	-1.3448	0.62037	0.86555	0.999997	1366	1	-1.3448
INTS1	15	2.6871e-08	2.8256e-06	0.00016	21	14	-1.4151	1	1	0.999997	1744	0	-1.4151
DCPS	15	2.7378e-08	2.8256e-06	0.00016	22	11	-1.2568	0.60464	0.85698	0.999997	1350	2	-1.2568
PROX1	15	4.6518e-08	2.8256e-06	0.00016	23	13	-1.5378	0.99903	0.99888	0.999997	1706	0	-1.5378
CCDC22	15	6.1613e-08	2.8256e-06	0.00016	24	14	-0.72652	1	1	0.999997	1741	0	-0.72652
CSNK1A1	15	1.1127e-07	2.8256e-06	0.00016	25	9	-1.5561	0.53342	0.8174	0.996579	1267	4	-1.5561
MBTPS2	15	1.4808e-07	2.8256e-06	0.00016	26	12	-1.4332	0.99931	0.99919	0.999997	1711	0	-1.4332
AXIN1	15	1.9834e-07	2.8256e-06	0.00016	27	14	-0.90418	0.99777	0.998	0.999997	1696	1	-0.90418
EXOC8	15	1.9874e-07	2.8256e-06	0.00016	28	13	-0.89387	0.98754	0.99531	0.999997	1671	2	-0.89387
GMPPB	15	2.4432e-07	2.8256e-06	0.00016	29	13	-1.8569	0.99233	0.99669	0.999997	1677	1	-1.8569
SETDB1	15	2.5501e-07	2.8256e-06	0.00016	30	14	-1.0927	0.99994	0.99996	0.999997	1730	0	-1.0927
RABIF	15	3.2427e-07	2.8256e-06	0.00016	31	12	-1.0574	0.99839	0.99834	0.999997	1699	1	-1.0574
GDI2	15	4.3719e-07	8.4769e-06	0.000424	32	14	-1.2853	0.9955	0.99718	0.999997	1686	1	-1.2853
POLR3H	15	4.6648e-07	8.4769e-06	0.000424	33	13	-1.4406	0.87232	0.96625	0.999997	1589	1	-1.4406
TAF10	15	5.6543e-07	8.4769e-06	0.000424	34	13	-0.81495	0.97972	0.99292	0.999997	1659	1	-0.81495
MTA2	15	1.1084e-06	1.4128e-05	0.000651	35	14	-0.77066	0.4908	0.79331	0.987128	1209	1	-0.77066
RAB10	15	1.1358e-06	1.4128e-05	0.000651	36	13	-1.0311	0.99998	0.99998	0.999997	1735	0	-1.0311
KIAA1432	15	1.3226e-06	1.4128e-05	0.000651	37	12	-1.3763	0.59472	0.8516	0.999997	1342	2	-1.3763
HYOU1	14	2.0836e-06	8.4769e-06	0.000424	38	10	-1.5959	0.84278	0.95346	0.999997	1569	1	-1.5959
EXOC2	15	2.1374e-06	1.9779e-05	0.000845	39	12	-1.1721	0.99975	0.9998	0.999997	1721	0	-1.1721
DHRSX	15	2.1665e-06	1.9779e-05	0.000845	40	12	-1.1896	0.71513	0.912	0.999997	1473	2	-1.1896
MPDU1	15	2.9584e-06	2.5431e-05	0.001036	41	12	-0.8755	0.58016	0.84293	0.999997	1318	2	-0.8755
MGAT1	15	3.1926e-06	2.5431e-05	0.001036	42	13	-0.63681	0.62631	0.86866	0.999997	1373	2	-0.63681
GPN2	14	3.3449e-06	1.9779e-05	0.000845	43	12	-1.405	0.99617	0.9968	0.999997	1689	1	-1.405
HNRNPU	15	4.3659e-06	3.6733e-05	0.001463	44	13	-1.3617	0.99999	0.99999	0.999997	1737	0	-1.3617
PFDN2	15	7.671e-06	6.4989e-05	0.00253	45	12	-1.523	0.99967	0.99971	0.999997	1719	0	-1.523
WDR82	15	1.0365e-05	7.6292e-05	0.002906	46	12	-1.0218	0.96359	0.98919	0.999997	1645	1	-1.0218
C21orf59	15	1.1519e-05	9.8897e-05	0.00361	47	11	-1.2886	0.79513	0.93954	0.999997	1532	2	-1.2886
USO1	15	1.1791e-05	9.8897e-05	0.00361	48	11	-0.99084	0.99977	0.99983	0.999997	1723	0	-0.99084
CEBPA	15	1.25e-05	0.00011585	0.004059	49	12	-0.7945	0.99585	0.99726	0.999997	1688	1	-0.7945
STT3A	15	1.3133e-05	0.00011585	0.004059	50	12	-1.1794	0.99449	0.99699	0.999997	1680	1	-1.1794
DPAGT1	15	1.3983e-05	0.0001215	0.004174	51	13	-1.3645	0.90453	0.97369	0.999997	1603	1	-1.3645
GPN3	15	1.5384e-05	0.0001328	0.004474	52	10	-0.8569	0.26478	0.5853	0.852558	812	1	-0.8569
CCT6A	15	1.7407e-05	0.00016106	0.005324	53	13	-1.5064	0.98655	0.99491	0.999997	1670	2	-1.5064
UXT	15	1.9666e-05	0.00018367	0.005959	54	11	-1.0984	0.9709	0.99075	0.999997	1649	1	-1.0984
SYS1	15	2.171e-05	0.00020627	0.006453	55	13	-1.1123	0.93756	0.98279	0.999997	1624	1	-1.1123
PIAS1	15	2.2187e-05	0.00020627	0.006453	56	11	-0.93205	0.92164	0.97808	0.999997	1615	2	-0.93205
EXOC3	15	2.3493e-05	0.00021757	0.006688	57	12	-1.3015	0.99997	0.99998	0.999997	1732	0	-1.3015
SUMO2	15	3.2451e-05	0.00027974	0.00845	58	12	-1.0307	0.88057	0.96807	0.999997	1593	3	-1.0307
PPIL2	15	3.3085e-05	0.00029669	0.00881	59	12	-0.9129	0.99948	0.99947	0.999997	1717	0	-0.9129
SRCAP	15	3.8582e-05	0.00035885	0.010479	60	10	-0.99516	0.9952	0.99712	0.999997	1683	1	-0.99516
STAG2	15	4.5122e-05	0.00040972	0.011768	61	11	-1.6272	0.99929	0.99918	0.999997	1710	0	-1.6272
TRIAP1	15	4.8802e-05	0.00044927	0.012696	62	9	-1.1673	0.26662	0.58788	0.85288	816	3	-1.1673
CABIN1	15	6.213e-05	0.00055665	0.015393	63	10	-0.79619	0.96222	0.98894	0.999997	1644	2	-0.79619
WRB	15	6.2644e-05	0.0005623	0.015393	64	12	-0.73981	0.94299	0.9843	0.999997	1627	3	-0.73981
HAVCR1	15	8.7049e-05	0.00077705	0.020777	65	10	-0.52351	0.99984	0.99989	0.999997	1724	0	-0.52351
WDR61	15	8.8192e-05	0.0007827	0.020777	66	11	-0.76874	0.997	0.99774	0.999997	1694	1	-0.76874
ERCC3	15	9.7737e-05	0.00086747	0.022684	67	11	-1.453	0.82973	0.952	0.999997	1563	3	-1.453
MED26	15	0.00010098	0.00090137	0.022984	68	12	-0.95689	0.99545	0.99718	0.999997	1685	1	-0.95689
MED20	15	0.00010138	0.00090703	0.022984	69	10	-0.82957	0.97581	0.99187	0.999997	1651	1	-0.82957
GAGE12B	15	0.00010296	0.00091833	0.022984	70	11	-1.014	1	1	0.999997	1746	0	-1.014
GTF2H3	15	0.00012812	0.0011331	0.02796	71	9	-0.9775	0.9132	0.97609	0.999997	1611	2	-0.9775
GTF2A2	15	0.00013781	0.0012291	0.029909	72	10	-1.0617	0.71062	0.91054	0.999997	1468	3	-1.0617
CHAF1B	15	0.00015125	0.0013478	0.032348	73	12	-0.90721	1	1	0.999997	1743	0	-0.90721
CTNNBIP1	15	0.00016636	0.0014495	0.034319	74	12	-0.53847	0.17614	0.46256	0.782996	621	2	-0.53847
SETD1A	15	0.00017489	0.0015343	0.035842	75	12	-0.51769	0.96821	0.99018	0.999997	1646	1	-0.51769
UBA2	15	0.00018229	0.0015852	0.036542	76	12	-0.98929	0.99807	0.99813	0.999997	1698	1	-0.98929
ATP13A1	15	0.00019057	0.0016473	0.037482	77	10	-0.79168	0.99945	0.99941	0.999997	1716	0	-0.79168
EXOC1	15	0.00019814	0.0017039	0.037809	78	10	-1.0234	0.99911	0.99896	0.999997	1708	0	-1.0234
PTAR1	15	0.00019924	0.0017152	0.037809	79	10	-0.76103	0.78972	0.93747	0.999997	1527	3	-0.76103
NMT1	15	0.00020148	0.0017265	0.037809	80	11	-1.0284	0.81299	0.94601	0.999997	1553	2	-1.0284
VPS29	15	0.00020765	0.0017717	0.03832	81	11	-0.80393	0.95804	0.9882	0.999997	1642	2	-0.80393
EXOC7	15	0.00023352	0.0019638	0.041958	82	12	-0.5488	0.9999	0.99993	0.999997	1728	0	-0.5488
WDR7	15	0.00023672	0.0019977	0.042165	83	12	-0.64495	0.99999	1	0.999997	1738	0	-0.64495
VPS72	15	0.00024178	0.0020373	0.042165	84	10	-0.69914	0.99792	0.99806	0.999997	1697	1	-0.69914
ACTR3	15	0.00024525	0.0020599	0.042165	85	11	-1.1656	0.68774	0.90103	0.999997	1436	2	-1.1656
TMEM165	15	0.00024865	0.0020825	0.042165	86	10	-0.83508	0.79942	0.94111	0.999997	1535	4	-0.83508
DDX27	15	0.00025035	0.0020938	0.042165	87	11	-1.0463	0.74934	0.92337	0.999997	1504	3	-1.0463
USP9X	15	0.00026856	0.0022916	0.045623	88	11	-0.79844	0.87953	0.96785	0.999997	1592	2	-0.79844
NUDT21	15	0.00029875	0.0025515	0.050228	89	12	-0.96291	0.99909	0.99895	0.999997	1707	0	-0.96291
EEFSEC	15	0.00030426	0.0025967	0.05055	90	12	-0.79177	0.99996	0.99997	0.999997	1731	0	-0.79177
UBE2G2	15	0.00032133	0.0026985	0.051262	91	12	-1.261	0.69718	0.90579	0.999997	1450	2	-1.261
ARPC4	15	0.00032474	0.0027154	0.051262	92	11	-0.85787	0.24041	0.55296	0.833835	757	2	-0.85787
RNMT	15	0.00032538	0.0027211	0.051262	93	9	-0.7272	0.83689	0.95465	0.999997	1564	3	-0.7272
NELFB	15	0.00033315	0.0027719	0.051664	94	10	-1.0017	0.65563	0.88423	0.999997	1403	5	-1.0017
FDX1L	15	0.00038719	0.0032297	0.059562	95	11	-0.86497	0.99944	0.99939	0.999997	1715	0	-0.86497
TAF7	15	0.00040432	0.003371	0.06152	96	9	-1.1764	0.60721	0.85854	0.999997	1354	2	-1.1764
FNTB	15	0.00043255	0.0036309	0.065581	97	11	-0.68976	0.98293	0.99383	0.999997	1662	2	-0.68976
GPN1	15	0.00043881	0.0036761	0.06572	98	9	-0.48028	0.6575	0.88511	0.999997	1406	3	-0.48028
STRAP	15	0.00052783	0.0043373	0.076758	99	11	-1.0625	0.89786	0.972	0.999997	1597	2	-1.0625
PGS1	15	0.00054214	0.0044391	0.077772	100	11	-0.72333	0.99957	0.99958	0.999997	1718	0	-0.72333
GTF3C4	15	0.00059176	0.0048233	0.083668	101	11	-0.73532	0.26846	0.5902	0.853246	822	3	-0.73532
MESDC2	15	0.00065761	0.0052698	0.090516	102	9	-0.74839	0.29732	0.62502	0.874465	886	3	-0.74839
MED12	15	0.00067802	0.0054337	0.091796	103	11	-0.83419	0.99998	0.99999	0.999997	1736	0	-0.83419
VPS51	15	0.00068686	0.0054789	0.091796	104	11	-0.54273	0.84286	0.95682	0.999997	1570	3	-0.54273
ALG8	15	0.00069132	0.0055015	0.091796	105	8	-1.1389	0.60095	0.85495	0.999997	1347	4	-1.1389
SAFB	15	0.00073827	0.005801	0.095881	106	11	-0.74467	0.99631	0.99743	0.999997	1691	1	-0.74467
GAPDH	15	0.00085553	0.0066091	0.106867	107	11	-0.49323	0.99973	0.99977	0.999997	1720	0	-0.49323
MEF2BNB	15	0.00086106	0.0066374	0.106867	108	10	-0.62012	0.60204	0.85555	0.999997	1348	2	-0.62012
INTS12	15	0.00086419	0.0066487	0.106867	109	11	-0.63397	0.99997	0.99998	0.999997	1733	0	-0.63397
NAA10	15	0.00094087	0.007163	0.114086	110	11	-0.7875	0.80431	0.9428	0.999997	1539	2	-0.7875
INTS6	15	0.0010008	0.0075812	0.119659	111	7	-0.46911	0.78436	0.93567	0.999997	1523	2	-0.46911
GFER	15	0.0010326	0.0077733	0.121597	112	10	-0.86736	0.97763	0.99234	0.999997	1658	2	-0.86736
ATXN7L3	15	0.0010803	0.0080728	0.125164	113	9	-0.68886	0.93001	0.98059	0.999997	1619	3	-0.68886
NCBP1	15	0.0010925	0.0081632	0.125456	114	10	-0.8941	0.98755	0.99532	0.999997	1672	1	-0.8941
CMTR1	15	0.0011562	0.0085193	0.129789	115	11	-0.74347	0.99881	0.99867	0.999997	1704	1	-0.74347
WDR37	15	0.0011722	0.0086492	0.130633	116	10	-0.63492	0.81361	0.94623	0.999997	1555	2	-0.63492
CDC73	15	0.0011902	0.0087849	0.131548	117	11	-0.64006	0.99997	0.99998	0.999997	1734	0	-0.64006
LSM2	15	0.0012696	0.0092483	0.137313	118	8	-0.67119	0.16602	0.44753	0.778761	591	4	-0.67119
SCARB1	15	0.0013492	0.0097004	0.140602	119	9	-0.60711	0.95942	0.9884	0.999997	1643	1	-0.60711
NELFA	15	0.0013527	0.0097117	0.140602	120	10	-0.53352	0.51011	0.80468	0.990365	1240	3	-0.53352
CPSF4	15	0.0013574	0.0097456	0.140602	121	11	-0.76112	0.98337	0.99397	0.999997	1664	2	-0.76112
UVRAG	15	0.0013669	0.0097908	0.140602	122	10	-1.0197	0.63934	0.87561	0.999997	1390	3	-1.0197
CTDP1	15	0.0015073	0.010701	0.152419	123	10	-0.58559	0.8842	0.9689	0.999997	1594	2	-0.58559
BRD2	15	0.0015302	0.010904	0.154064	124	11	-0.54894	0.98109	0.99333	0.999997	1660	1	-0.54894
COPS6	15	0.0016067	0.011362	0.158532	125	11	-0.51343	0.0030709	0.020709	0.318265	84	3	-0.51343
ARFRP1	15	0.0016239	0.011475	0.158532	126	9	-0.69336	0.63216	0.87193	0.999997	1382	3	-0.69336
RANBP1	15	0.0016308	0.011531	0.158532	127	10	-0.42661	0.99888	0.99873	0.999997	1705	1	-0.42661
C16orf62	15	0.0016448	0.011582	0.158532	128	9	-0.71383	0.98452	0.99432	0.999997	1667	1	-0.71383
PGM3	15	0.0019549	0.013583	0.184473	129	10	-0.54869	0.94097	0.98375	0.999997	1625	2	-0.54869
DNAJC13	15	0.0020228	0.013984	0.187628	130	11	-0.7812	0.25829	0.57704	0.84975	796	1	-0.7812
GTF2E1	15	0.0020393	0.014029	0.187628	131	10	-0.67385	0.91544	0.97665	0.999997	1613	1	-0.67385
TMEM258	15	0.0021695	0.014713	0.195282	132	9	-0.75549	0.23659	0.54802	0.83108	750	3	-0.75549
EIF2B4	15	0.0024718	0.016488	0.217189	133	9	-0.71892	0.99865	0.99851	0.999997	1701	1	-0.71892
PDRG1	15	0.0025797	0.017092	0.223474	134	10	-0.84546	0.99861	0.99849	0.999997	1700	1	-0.84546
GREB1L	15	0.0027676	0.0182	0.235695	135	10	-0.71418	0.58721	0.84715	0.999997	1328	2	-0.71418
TAF1	15	0.0027869	0.018296	0.235695	136	10	-0.80216	0.91138	0.97564	0.999997	1608	2	-0.80216
ATP6AP2	15	0.0031882	0.020596	0.263388	137	8	-0.43215	0.68192	0.89782	0.999997	1431	2	-0.43215
GAGE1	14	0.0033634	0.020929	0.265712	138	10	-0.76543	0.95706	0.98574	0.999997	1640	1	-0.76543
DHX36	15	0.0035193	0.022325	0.281395	139	9	-0.53775	0.97733	0.99227	0.999997	1657	1	-0.53775
TAF1B	15	0.00375	0.023659	0.296075	140	8	-0.83596	0.90246	0.97315	0.999997	1600	3	-0.83596
POLR2E	15	0.0040023	0.024902	0.309423	141	10	-0.6491	0.80987	0.94482	0.999997	1551	2	-0.6491
POLR2L	15	0.0041815	0.02597	0.320423	142	9	-0.51524	0.84721	0.95861	0.999997	1573	2	-0.51524
STX4	15	0.0042736	0.026462	0.322367	143	10	-0.40336	0.81006	0.94492	0.999997	1552	2	-0.40336
HYPK	15	0.0042838	0.026496	0.322367	144	9	-1.0842	0.95118	0.9868	0.999997	1637	1	-1.0842
POLR1B	15	0.0043959	0.027151	0.326021	145	10	-0.59964	0.43217	0.74575	0.950563	1118	2	-0.59964
POLR2C	15	0.0044008	0.027168	0.326021	146	8	-0.53613	0.97634	0.99198	0.999997	1654	1	-0.53613
WDR55	15	0.0044463	0.027366	0.32616	147	10	-0.66219	0.092259	0.30418	0.702144	398	5	-0.66219
INTS2	15	0.0047195	0.02883	0.341283	148	10	-0.53855	0.39941	0.71744	0.935467	1065	3	-0.53855
VPS35	15	0.0048111	0.029265	0.344109	149	10	-0.78353	0.99985	0.9999	0.999997	1725	0	-0.78353
MSTO1	15	0.005398	0.032339	0.377723	150	10	-0.77154	0.99976	0.99982	0.999997	1722	0	-0.77154
EXOC4	15	0.0055643	0.033159	0.384729	151	10	-0.50438	0.91082	0.97548	0.999997	1607	2	-0.50438
LAS1L	15	0.0056956	0.033837	0.390014	152	9	-0.93975	0.72827	0.91612	0.999997	1485	2	-0.93975
SRP19	15	0.005818	0.034464	0.394648	153	9	-0.94038	0.78901	0.93726	0.999997	1526	2	-0.94038
SLC7A6OS	15	0.00587	0.034758	0.395429	154	9	-0.70255	0.9948	0.99704	0.999997	1682	1	-0.70255
SPATA5	15	0.0061694	0.036391	0.411338	155	10	-0.75962	0.98951	0.9961	0.999997	1675	2	-0.75962
SNF8	15	0.0067918	0.039629	0.445069	156	9	-0.72594	0.74642	0.92239	0.999997	1499	3	-0.72594
DYRK1A	15	0.0069668	0.040471	0.45163	157	10	-0.3912	0.74942	0.92342	0.999997	1505	3	-0.3912
METAP1	15	0.0070798	0.041076	0.455477	158	9	-0.68971	1	1	0.999997	1739	0	-0.68971
IPO9	15	0.0074407	0.04293	0.473037	159	10	-0.45051	0.52873	0.81474	0.994718	1263	1	-0.45051
SRP14	15	0.0076044	0.043744	0.476262	160	10	-0.45192	0.711	0.91065	0.999997	1469	3	-0.45192
INSR	15	0.007609	0.043766	0.476262	161	9	-0.58266	0.35922	0.68201	0.918429	1004	1	-0.58266
GET4	15	0.0077649	0.044619	0.482551	162	9	-0.57629	0.7082	0.90962	0.999997	1466	4	-0.57629
PIK3R4	15	0.0079935	0.04584	0.492711	163	9	-0.53515	0.42854	0.74252	0.950563	1109	4	-0.53515
MARS2	15	0.0080979	0.04636	0.495261	164	10	-0.58797	0.92194	0.97816	0.999997	1616	2	-0.58797
GNB2L1	15	0.0082154	0.046869	0.49766	165	9	-0.66072	0.63447	0.87314	0.999997	1385	4	-0.66072
RAB7A	15	0.0086108	0.048909	0.515176	166	9	-0.7159	0.91039	0.97531	0.999997	1606	3	-0.7159
NCOR1	15	0.0087011	0.049316	0.515176	167	10	-0.39403	0.23755	0.5493	0.83108	752	1	-0.39403
SREBF1	15	0.0087179	0.0494	0.515176	168	10	-0.39005	0.92506	0.97914	0.999997	1617	2	-0.39005
COMMD3	15	0.0090864	0.051005	0.526063	169	9	-0.36154	0.87937	0.9678	0.999997	1591	3	-0.36154
ATP6V0D1	15	0.0090944	0.051045	0.526063	170	10	-0.48661	0.6988	0.90656	0.999997	1453	2	-0.48661
SIN3B	15	0.009163	0.051548	0.52814	171	9	-0.46022	0.65697	0.88486	0.999997	1404	2	-0.46022
ZNHIT1	15	0.00946	0.052966	0.539518	172	9	-0.62828	0.615	0.86282	0.999997	1359	3	-0.62828
CERS2	15	0.0096243	0.053678	0.541852	173	9	-0.33344	0.98601	0.99476	0.999997	1669	2	-0.33344
UBE2I	15	0.0096441	0.053814	0.541852	174	9	-0.5387	0.007966	0.046603	0.427479	108	2	-0.5387
TOMM22	15	0.0098435	0.054656	0.547185	175	9	-0.44092	0.66047	0.88656	0.999997	1410	4	-0.44092
SSR2	15	0.0099869	0.055323	0.550714	176	9	-0.37765	0.69638	0.9054	0.999997	1447	4	-0.37765
NR2C2AP	15	0.011402	0.061228	0.599452	177	9	-0.63478	0.9701	0.99058	0.999997	1648	2	-0.63478
PES1	15	0.011405	0.061245	0.599452	178	9	-0.54541	0.80728	0.94381	0.999997	1543	3	-0.54541
DHDDS	15	0.012192	0.064382	0.62665	179	9	-0.67865	0.73511	0.91843	0.999997	1490	4	-0.67865
INTS8	15	0.015166	0.076662	0.739446	180	9	-0.5991	0.72869	0.91627	0.999997	1486	2	-0.5991
UBA3	15	0.015215	0.076815	0.739446	181	8	-0.43173	0.29673	0.62447	0.874465	885	4	-0.43173
PFDN6	15	0.015455	0.077854	0.745361	182	9	-0.61354	0.90103	0.97279	0.999997	1598	2	-0.61354
TMEM30A	15	0.016313	0.081268	0.773811	183	9	-0.61827	0.65057	0.88165	0.999997	1397	2	-0.61827
OSTC	15	0.017125	0.084557	0.800197	184	9	-0.46751	0.49472	0.7959	0.98825	1214	3	-0.46751
TMEM199	15	0.017231	0.084952	0.800197	185	8	-0.55203	0.99877	0.99865	0.999997	1703	1	-0.55203
hsa-mir-3670-1	5	0.018746	0.059256	0.586536	186	4	-0.61593	0.91938	0.92027	0.999997	1614	0	-0.61593
RPL13A	13	0.019012	0.088145	0.825833	187	7	-0.41762	0.88641	0.96381	0.999997	1595	3	-0.41762
KIAA1033	15	0.019855	0.095419	0.88922	188	9	-0.63531	0.53903	0.82073	0.999247	1274	2	-0.63531
NHLRC2	15	0.020373	0.097368	0.901746	189	6	-0.31376	0.9037	0.97347	0.999997	1602	2	-0.31376
ZBTB8OS	15	0.020495	0.097792	0.901746	190	9	-0.52457	0.77689	0.9331	0.999997	1520	3	-0.52457
CTCF	15	0.021039	0.099713	0.912567	191	7	-0.25556	0.83959	0.95545	0.999997	1567	3	-0.25556
ELP5	15	0.021117	0.10001	0.912567	192	6	-0.11076	0.97615	0.99192	0.999997	1653	1	-0.11076
ASH2L	15	0.021932	0.10319	0.936772	193	7	-0.33844	0.99941	0.99935	0.999997	1713	0	-0.33844
SLC35B2	15	0.022166	0.1041	0.937421	194	9	-0.43892	0.99917	0.99905	0.999997	1709	0	-0.43892
EIF6	15	0.022243	0.10434	0.937421	195	9	-0.60947	0.99655	0.99753	0.999997	1692	1	-0.60947
SMC1A	15	0.023725	0.10979	0.981385	196	7	-0.22495	0.6998	0.90688	0.999997	1454	3	-0.22495
SLC35A2	15	0.024146	0.11147	0.99133	197	9	-0.45954	0.99529	0.99715	0.999997	1684	1	-0.45954
PFN1	15	0.024683	0.11349	0.999997	198	9	-0.31774	0.98326	0.99393	0.999997	1663	2	-0.31774
PHKG2	15	0.02506	0.11501	0.999997	199	9	-0.43549	0.99737	0.99785	0.999997	1695	1	-0.43549
ALG14	15	0.025081	0.11506	0.999997	200	7	-0.074854	0.64895	0.88081	0.999997	1395	5	-0.074854
DNAJC17	15	0.025271	0.11575	0.999997	201	9	-0.69889	0.67166	0.89245	0.999997	1420	3	-0.69889
CARS	15	0.025606	0.11695	0.999997	202	7	-0.31599	0.86682	0.96489	0.999997	1585	3	-0.31599
DENND4A	15	0.02679	0.12123	0.999997	203	9	-0.51442	0.99986	0.9999	0.999997	1726	0	-0.51442
GSK3B	15	0.026878	0.12158	0.999997	204	9	-0.40688	0.32953	0.65523	0.897413	947	2	-0.40688
C19orf52	15	0.027046	0.1222	0.999997	205	8	-0.32906	0.99676	0.99761	0.999997	1693	1	-0.32906
hsa-mir-6515	13	0.027813	0.12045	0.999997	206	6	-0.38305	0.70663	0.89591	0.999997	1463	4	-0.38305
TM9SF2	15	0.028146	0.12626	0.999997	207	9	-0.44969	0.2864	0.61324	0.868546	860	2	-0.44969
URI1	15	0.028475	0.12741	0.999997	208	8	-0.53712	0.57487	0.8402	0.999997	1312	5	-0.53712
NOP16	15	0.028829	0.12863	0.999997	209	8	-0.52734	0.91271	0.97596	0.999997	1610	2	-0.52734
RPS14	15	0.029013	0.12938	0.999997	210	8	-0.58692	0.067292	0.24609	0.677239	325	4	-0.58692
POLR3C	15	0.02998	0.13273	0.999997	211	8	-0.65793	0.59097	0.84946	0.999997	1335	3	-0.65793
C19orf57	15	0.030182	0.13356	0.999997	212	9	-0.35348	0.90316	0.97333	0.999997	1601	2	-0.35348
USP39	15	0.030804	0.13585	0.999997	213	8	-0.67678	0.98388	0.99411	0.999997	1665	1	-0.67678
RPL23A	15	0.031341	0.13775	0.999997	214	8	-0.55763	0.98897	0.99588	0.999997	1674	2	-0.55763
TP53TG3	15	0.031666	0.13899	0.999997	215	8	-0.44005	0.976	0.99189	0.999997	1652	2	-0.44005
hsa-mir-6859-1	14	0.032355	0.13602	0.999997	216	8	-0.64832	0.12501	0.36794	0.738102	484	6	-0.64832
PAM16	15	0.032484	0.1418	0.999997	217	9	-0.45466	0.97671	0.99211	0.999997	1656	1	-0.45466
CEBPZ	15	0.032632	0.1423	0.999997	218	8	-0.62243	0.60619	0.85791	0.999997	1353	4	-0.62243
PPP1CB	15	0.032897	0.14339	0.999997	219	9	-0.50863	0.36433	0.68645	0.921428	1011	3	-0.50863
CIAO1	15	0.033646	0.14585	0.999997	220	8	-0.6861	0.3681	0.68999	0.921428	1014	3	-0.6861
C11orf57	15	0.03714	0.15593	0.999997	221	7	-0.063306	0.63466	0.8732	0.999997	1386	5	-0.063306
CDC23	14	0.037823	0.15333	0.999997	222	8	-0.46101	0.16834	0.443	0.778761	600	2	-0.46101
MED27	15	0.038928	0.16122	0.999997	223	8	-0.34632	0.20344	0.50201	0.803115	679	4	-0.34632
SEC61B	15	0.040293	0.16534	0.999997	224	7	-0.26987	0.92699	0.97971	0.999997	1618	3	-0.26987
RPL28	15	0.040765	0.16675	0.999997	225	8	-0.42425	0.85974	0.96324	0.999997	1583	4	-0.42425
MOCS3	15	0.041197	0.16802	0.999997	226	8	-0.31722	0.68457	0.89921	0.999997	1433	5	-0.31722
HSPA8	15	0.042837	0.17263	0.999997	227	8	-0.55186	0.99988	0.99991	0.999997	1727	0	-0.55186
DNLZ	15	0.046479	0.18278	0.999997	228	7	-0.25315	0.32298	0.64906	0.895892	937	5	-0.25315
RCC1	15	0.046479	0.18278	0.999997	229	8	-0.38949	0.63162	0.87163	0.999997	1381	5	-0.38949
GTF3A	15	0.046841	0.18373	0.999997	230	8	-0.31846	0.49652	0.79704	0.988261	1217	4	-0.31846
CMAS	15	0.047516	0.18548	0.999997	231	7	-0.12764	0.63567	0.87374	0.999997	1388	5	-0.12764
SPDYE2	15	0.047938	0.18669	0.999997	232	8	-0.299	0.94859	0.98599	0.999997	1633	3	-0.299
DARS	14	0.048872	0.18706	0.999997	233	7	-0.45675	0.90214	0.97032	0.999997	1599	3	-0.45675
EIF5A	15	0.049959	0.19203	0.999997	234	8	-0.34169	0.61131	0.86087	0.999997	1357	2	-0.34169
PTPMT1	15	0.051089	0.19526	0.999997	235	8	-0.28386	0.49407	0.79546	0.98825	1212	3	-0.28386
NOMO1	15	0.051496	0.19655	0.999997	236	8	-0.31145	0.57069	0.83773	0.999997	1305	3	-0.31145
ATP6V1H	15	0.052512	0.19929	0.999997	237	8	-0.57208	0.12002	0.36402	0.73557	467	6	-0.57208
NCBP2	15	0.053434	0.20187	0.999997	238	7	-0.39065	0.56762	0.83601	0.999997	1302	3	-0.39065
MGEA5	15	0.057727	0.21352	0.999997	239	8	-0.28934	0.79372	0.93901	0.999997	1530	3	-0.28934
TCERG1	15	0.059	0.21702	0.999997	240	8	-0.56278	0.48155	0.78591	0.982802	1193	3	-0.56278
FAM21A	15	0.062137	0.22556	0.999997	241	8	-0.37112	0.689	0.90168	0.999997	1439	3	-0.37112
MED8	15	0.063299	0.22858	0.999997	242	8	-0.36969	0.99297	0.99682	0.999997	1678	1	-0.36969
hsa-mir-6511a-4	15	0.066036	0.23553	0.999997	243	8	-0.2429	0.87069	0.96586	0.999997	1588	2	-0.2429
CTR9	15	0.07434	0.25659	0.999997	244	8	-0.45963	0.7175	0.91271	0.999997	1474	1	-0.45963
HSPE1	15	0.074771	0.25781	0.999997	245	5	0.024384	0.65784	0.88528	0.999997	1407	5	0.024384
DAP3	15	0.079169	0.2688	0.999997	246	8	-0.50947	0.99943	0.99936	0.999997	1714	0	-0.50947
DET1	15	0.080224	0.27148	0.999997	247	8	-0.3946	0.99575	0.99724	0.999997	1687	1	-0.3946
SSH3	15	0.081243	0.27389	0.999997	248	4	-0.06533	0.48683	0.79024	0.985634	1201	6	-0.06533
GART	15	0.082146	0.27602	0.999997	249	8	-0.39463	0.71289	0.91131	0.999997	1472	4	-0.39463
HDAC6	15	0.082654	0.27734	0.999997	250	8	-0.30216	0.049851	0.19856	0.644891	261	3	-0.30216
NRBP1	15	0.082782	0.27757	0.999997	251	6	-0.23348	0.91155	0.97569	0.999997	1609	2	-0.23348
MRPL28	15	0.085751	0.28498	0.999997	252	8	-0.25136	0.6268	0.86897	0.999997	1374	5	-0.25136
UPF1	15	0.085862	0.28522	0.999997	253	8	-0.35848	0.59008	0.84893	0.999997	1333	5	-0.35848
SNAPC2	15	0.08669	0.28724	0.999997	254	6	-0.1144	0.82504	0.95027	0.999997	1559	3	-0.1144
DROSHA	15	0.086976	0.2879	0.999997	255	8	-0.33911	0.98207	0.9936	0.999997	1661	1	-0.33911
KMT2D	15	0.087312	0.28867	0.999997	256	8	-0.37189	0.96945	0.99045	0.999997	1647	2	-0.37189
SPNS1	15	0.089006	0.29276	0.999997	257	8	-0.33409	0.94381	0.98452	0.999997	1628	2	-0.33409
PIGS	15	0.090377	0.29629	0.999997	258	8	-0.29992	0.62097	0.86589	0.999997	1367	4	-0.29992
HNRNPA2B1	15	0.097375	0.3117	0.999997	259	6	-0.28188	0.3238	0.64993	0.895892	939	5	-0.28188
CCT8	15	0.097943	0.31283	0.999997	260	6	-0.18233	0.8011	0.9417	0.999997	1536	4	-0.18233
CENPA	15	0.098005	0.31296	0.999997	261	7	-0.12918	0.62397	0.8675	0.999997	1371	5	-0.12918
KCTD5	15	0.10208	0.32057	0.999997	262	6	-0.01629	0.66905	0.89122	0.999997	1417	5	-0.01629
ZBTB17	15	0.10882	0.33318	0.999997	263	7	-0.39859	0.19242	0.48639	0.797897	651	4	-0.39859
GNB1L	15	0.10942	0.33432	0.999997	264	7	-0.011473	0.97424	0.99151	0.999997	1650	2	-0.011473
EIF3F	15	0.11702	0.34835	0.999997	265	7	-0.043018	0.94785	0.98571	0.999997	1630	1	-0.043018
CHMP1A	15	0.11893	0.35187	0.999997	266	6	-0.20475	0.70575	0.90878	0.999997	1461	3	-0.20475
MEF2B	15	0.12148	0.35674	0.999997	267	7	-0.27282	0.99383	0.99691	0.999997	1679	1	-0.27282
NonTargeting_Human_0922	1	0.12338	0.12465	0.999997	268	1	-1.0413	0.87662	0.87635	0.999997	1590	0	-1.0413
YME1L1	15	0.12734	0.3677	0.999997	269	7	-0.22877	0.95091	0.98672	0.999997	1635	2	-0.22877
RAB13	15	0.12811	0.36908	0.999997	270	4	-0.037645	0.75917	0.9268	0.999997	1509	4	-0.037645
FURIN	15	0.12978	0.37248	0.999997	271	4	-0.086454	0.3697	0.6914	0.921428	1019	1	-0.086454
C9orf41	15	0.13463	0.38142	0.999997	272	7	0.13285	0.24824	0.56359	0.841783	770	4	0.13285
RUVBL1	15	0.13907	0.389	0.999997	273	2	0.0074052	0.00061488	0.005185	0.163985	54	4	0.0074052
OTC	15	0.13907	0.389	0.999997	274	4	0.2632	0.19708	0.49307	0.801541	663	7	0.2632
NonTargeting_Human_0164	1	0.13945	0.14059	0.999997	275	1	-0.90426	0.86055	0.86061	0.999997	1584	0	-0.90426
NonTargeting_Human_0454	1	0.14044	0.14153	0.999997	276	1	-0.69654	0.85956	0.85961	0.999997	1582	0	-0.69654
HIST2H3A	15	0.14267	0.39504	0.999997	277	6	-0.20776	0.29467	0.62242	0.873208	878	5	-0.20776
SLC12A9	15	0.14336	0.39616	0.999997	278	6	-0.19938	0.95102	0.98673	0.999997	1636	3	-0.19938
ARPC3	15	0.14511	0.39896	0.999997	279	7	-0.26339	0.85203	0.96043	0.999997	1578	3	-0.26339
NonTargeting_Human_0175	1	0.14585	0.14673	0.999997	280	1	-0.70851	0.85415	0.85392	0.999997	1579	0	-0.70851
VPS33A	15	0.14586	0.40044	0.999997	281	4	0.17227	0.23109	0.5404	0.82653	738	7	0.17227
NonTargeting_Human_0714	1	0.1488	0.14966	0.999997	282	1	-1.807	0.8512	0.85103	0.999997	1577	0	-1.807
RBM4B	15	0.14945	0.40667	0.999997	283	6	-0.16698	0.518	0.80897	0.990365	1251	3	-0.16698
RUVBL2	15	0.14985	0.40737	0.999997	284	6	-0.24451	0.9568	0.98797	0.999997	1639	2	-0.24451
SRP9	15	0.15102	0.40932	0.999997	285	6	-0.06579	0.34259	0.66673	0.907772	976	6	-0.06579
MFAP1	15	0.15131	0.40984	0.999997	286	7	-0.3741	0.4307	0.74446	0.950563	1114	3	-0.3741
NonTargeting_Human_0188	1	0.1529	0.15362	0.999997	287	1	-1.3492	0.8471	0.8472	0.999997	1572	0	-1.3492
NonTargeting_Human_0690	1	0.15307	0.15377	0.999997	288	1	-1.0884	0.84693	0.84704	0.999997	1571	0	-1.0884
hsa-mir-3680-1	10	0.15371	0.37446	0.999997	289	5	-0.21777	0.13423	0.35593	0.727625	503	4	-0.21777
RPL17	15	0.15663	0.41943	0.999997	290	7	-0.38579	0.44438	0.75569	0.957321	1137	3	-0.38579
EXT1	15	0.15892	0.42332	0.999997	291	6	-0.10059	0.2803	0.6055	0.863873	845	4	-0.10059
NonTargeting_Human_0938	1	0.15971	0.1603	0.999997	292	1	-0.68061	0.84029	0.84026	0.999997	1568	0	-0.68061
FAM57B	15	0.16107	0.42698	0.999997	293	7	-0.26948	0.98432	0.99425	0.999997	1666	1	-0.26948
CNOT2	15	0.16119	0.42728	0.999997	294	4	0.0054723	0.78988	0.93752	0.999997	1528	2	0.0054723
NonTargeting_Human_0806	1	0.1625	0.1631	0.999997	295	1	-0.78187	0.8375	0.83737	0.999997	1565	0	-0.78187
AQP10	15	0.16388	0.43222	0.999997	296	7	-0.11781	0.32084	0.64714	0.894536	931	2	-0.11781
SLC4A1AP	15	0.16796	0.43925	0.999997	297	7	0.17813	0.1475	0.41804	0.76612	542	5	0.17813
PLA2G10	15	0.16843	0.43992	0.999997	298	5	-0.17622	0.16338	0.44343	0.778761	580	3	-0.17622
MTHFD1	15	0.16943	0.44158	0.999997	299	5	-0.029852	0.69557	0.90494	0.999997	1445	3	-0.029852
hsa-mir-6770-1	10	0.1704	0.40093	0.999997	300	5	-0.036745	0.29581	0.57717	0.84975	884	4	-0.036745
NonTargeting_Human_0050	1	0.17176	0.17219	0.999997	301	1	-1.6172	0.82824	0.82805	0.999997	1561	0	-1.6172
COPS2	15	0.17263	0.44659	0.999997	302	4	0.22499	0.16761	0.45003	0.778761	596	7	0.22499
CAND1	15	0.17447	0.44946	0.999997	303	7	-0.3474	0.94386	0.98452	0.999997	1629	3	-0.3474
EPAS1	15	0.17534	0.45107	0.999997	304	6	0.041423	0.65882	0.88569	0.999997	1409	5	0.041423
DEXI	15	0.17741	0.45452	0.999997	305	7	-0.14879	0.74916	0.92332	0.999997	1503	3	-0.14879
NonTargeting_Human_0479	1	0.17775	0.17811	0.999997	306	1	-0.93495	0.82225	0.82201	0.999997	1558	0	-0.93495
ZBTB10	15	0.18392	0.46521	0.999997	307	7	-0.21883	0.82805	0.95137	0.999997	1560	3	-0.21883
NonTargeting_Human_0582	1	0.18546	0.18521	0.999997	308	1	-0.82301	0.81454	0.81443	0.994718	1556	0	-0.82301
MED1	15	0.1858	0.46832	0.999997	309	7	0.27022	0.090081	0.29925	0.702144	391	8	0.27022
MORC2	15	0.18802	0.47169	0.999997	310	6	-0.076091	0.16478	0.44565	0.778761	588	4	-0.076091
GZF1	15	0.18904	0.47343	0.999997	311	6	-0.04795	0.77598	0.93279	0.999997	1519	4	-0.04795
SEC13	15	0.18924	0.47371	0.999997	312	6	-0.20552	0.69764	0.90608	0.999997	1451	5	-0.20552
NonTargeting_Human_0889	1	0.19054	0.19036	0.999997	313	1	-0.77855	0.80946	0.80948	0.990365	1550	0	-0.77855
NonTargeting_Human_0542	1	0.19079	0.19059	0.999997	314	1	-0.8305	0.80921	0.80923	0.990365	1549	0	-0.8305
NDNL2	15	0.19094	0.4762	0.999997	315	7	-0.24689	0.75409	0.92506	0.999997	1507	4	-0.24689
NonTargeting_Human_0827	1	0.19145	0.19128	0.999997	316	1	-0.73309	0.80855	0.80874	0.990365	1547	0	-0.73309
NonTargeting_Human_0109	1	0.19177	0.19161	0.999997	317	1	-0.39261	0.80823	0.8084	0.990365	1546	0	-0.39261
NonTargeting_Human_0307	1	0.19202	0.1919	0.999997	318	1	-0.69487	0.80798	0.80818	0.990365	1545	0	-0.69487
TPI1	15	0.19232	0.47847	0.999997	319	5	-0.27031	0.95145	0.98687	0.999997	1638	2	-0.27031
SNRPD1	15	0.193	0.47957	0.999997	320	5	-0.1882	0.40017	0.71815	0.935467	1068	3	-0.1882
NonTargeting_Human_0728	1	0.19317	0.19304	0.999997	321	1	-0.51488	0.80683	0.80711	0.990365	1541	0	-0.51488
NonTargeting_Human_0101	1	0.19333	0.1932	0.999997	322	1	-0.46754	0.80667	0.807	0.990365	1540	0	-0.46754
NonTargeting_Human_0119	1	0.19579	0.19546	0.999997	323	1	-0.42041	0.80421	0.80475	0.990365	1538	0	-0.42041
BOLA2	15	0.198	0.48756	0.999997	324	5	-0.25561	0.83954	0.95544	0.999997	1566	3	-0.25561
PIM2	15	0.19823	0.48789	0.999997	325	6	0.13968	0.43963	0.75185	0.953832	1135	6	0.13968
RBM14	15	0.19848	0.48832	0.999997	326	7	-0.039319	0.40964	0.72645	0.939983	1083	4	-0.039319
IRS1	15	0.19892	0.48895	0.999997	327	5	-0.010761	0.43352	0.74686	0.950563	1124	4	-0.010761
WRNIP1	15	0.19944	0.48982	0.999997	328	2	0.47522	0.0023629	0.016278	0.306097	74	11	0.47522
NonTargeting_Human_0434	1	0.20137	0.20118	0.999997	329	1	-0.69321	0.79863	0.79916	0.988788	1534	0	-0.69321
NonTargeting_Human_0881	1	0.20317	0.203	0.999997	330	1	-0.78152	0.79683	0.79739	0.988261	1533	0	-0.78152
RICTOR	15	0.20343	0.49587	0.999997	331	7	-0.18274	0.63314	0.87248	0.999997	1383	5	-0.18274
ELP3	15	0.20467	0.49797	0.999997	332	6	-0.13763	0.57592	0.84074	0.999997	1314	3	-0.13763
NonTargeting_Human_0828	1	0.20563	0.2055	0.999997	333	1	-0.96458	0.79437	0.79486	0.98825	1531	0	-0.96458
NDUFA13	15	0.20898	0.50454	0.999997	334	7	-0.20828	0.29532	0.62301	0.873208	881	3	-0.20828
NonTargeting_Human_0033	1	0.20957	0.20932	0.999997	335	1	-0.58517	0.79043	0.79098	0.985634	1529	0	-0.58517
NonTargeting_Human_0210	1	0.21228	0.21195	0.999997	336	1	-0.4326	0.78772	0.78843	0.985258	1525	0	-0.4326
NonTargeting_Human_0394	1	0.2149	0.21465	0.999997	337	1	-0.38991	0.7851	0.78575	0.982802	1524	0	-0.38991
ZNF263	15	0.21631	0.51457	0.999997	338	5	-0.033065	0.22115	0.5268	0.816775	718	4	-0.033065
HIST1H2BB	15	0.21695	0.51535	0.999997	339	4	0.37335	0.053783	0.21073	0.6507	275	8	0.37335
NonTargeting_Human_0073	1	0.21695	0.21676	0.999997	340	1	-0.51844	0.78305	0.78374	0.981497	1522	0	-0.51844
NonTargeting_Human_0290	1	0.21736	0.21718	0.999997	341	1	-0.49405	0.78264	0.78336	0.981497	1521	0	-0.49405
MAP1S	15	0.21943	0.51839	0.999997	342	5	-0.18063	0.4744	0.77995	0.978854	1185	5	-0.18063
RBBP5	15	0.22352	0.52344	0.999997	343	6	-0.062844	0.94819	0.98587	0.999997	1632	3	-0.062844
NonTargeting_Human_0408	1	0.22482	0.22457	0.999997	344	1	-0.59774	0.77518	0.77563	0.974126	1518	0	-0.59774
ARIH1	15	0.22504	0.52516	0.999997	345	6	-0.11535	0.90752	0.97449	0.999997	1605	3	-0.11535
NAA38	15	0.22698	0.52742	0.999997	346	5	0.34815	0.14091	0.40714	0.762329	523	8	0.34815
GP1BB	15	0.22849	0.5292	0.999997	347	6	-0.15037	0.41273	0.72909	0.942014	1089	3	-0.15037
NonTargeting_Human_0245	1	0.22917	0.22919	0.999997	348	1	-0.45323	0.77083	0.7713	0.969377	1517	0	-0.45323
KDM6A	15	0.22962	0.53055	0.999997	349	5	-0.12958	0.98492	0.99444	0.999997	1668	2	-0.12958
ANO8	15	0.22999	0.53093	0.999997	350	6	-0.04444	0.6882	0.90123	0.999997	1437	4	-0.04444
MRPL9	15	0.23157	0.53271	0.999997	351	5	0.30218	0.031831	0.14127	0.604794	204	9	0.30218
MED9	15	0.23178	0.53294	0.999997	352	6	-0.037943	0.88825	0.96986	0.999997	1596	2	-0.037943
NonTargeting_Human_0823	1	0.23204	0.23199	0.999997	353	1	-0.50977	0.76796	0.76853	0.967285	1516	0	-0.50977
CEP97	15	0.23352	0.535	0.999997	354	5	0.20737	0.13813	0.40155	0.75891	516	7	0.20737
NonTargeting_Human_0266	1	0.23409	0.23415	0.999997	355	1	-0.48052	0.76591	0.76631	0.96519	1515	0	-0.48052
NonTargeting_Human_0936	1	0.23425	0.23431	0.999997	356	1	-0.5124	0.76575	0.76613	0.96519	1514	0	-0.5124
GCFC2	15	0.23468	0.53636	0.999997	357	4	0.33771	0.028525	0.13011	0.594658	189	8	0.33771
NonTargeting_Human_0603	1	0.23548	0.23538	0.999997	358	1	-0.41099	0.76452	0.76477	0.964634	1512	0	-0.41099
METTL14	15	0.23637	0.53832	0.999997	359	5	0.066652	0.82958	0.95196	0.999997	1562	4	0.066652
NonTargeting_Human_0443	1	0.24	0.23993	0.999997	360	1	-0.738	0.76	0.76041	0.960514	1510	0	-0.738
SULT1A2	15	0.24038	0.54291	0.999997	361	6	-0.13897	0.14904	0.42042	0.767821	547	5	-0.13897
NonTargeting_Human_0289	1	0.24278	0.24267	0.999997	362	1	-0.47637	0.75722	0.75769	0.959162	1508	0	-0.47637
C1GALT1	15	0.24423	0.54741	0.999997	363	6	0.029765	0.091596	0.30271	0.702144	397	5	0.029765
NonTargeting_Human_0969	1	0.2468	0.24678	0.999997	364	1	-0.58033	0.7532	0.75352	0.955263	1506	0	-0.58033
SCYL1	15	0.24981	0.55403	0.999997	365	6	-0.15147	0.76571	0.92908	0.999997	1513	2	-0.15147
NonTargeting_Human_0721	1	0.25205	0.25192	0.999997	366	1	-0.52379	0.74795	0.7483	0.950563	1501	0	-0.52379
NonTargeting_Human_0397	1	0.25246	0.25229	0.999997	367	1	-0.44084	0.74754	0.74804	0.950563	1500	0	-0.44084
CCZ1	15	0.25314	0.55787	0.999997	368	5	0.17626	0.48633	0.78993	0.985634	1199	5	0.17626
NonTargeting_Human_0300	1	0.25369	0.25353	0.999997	369	1	-0.54106	0.74631	0.74676	0.950563	1498	0	-0.54106
TMEM87B	15	0.25399	0.55892	0.999997	370	6	-0.10061	0.86781	0.96516	0.999997	1587	3	-0.10061
NonTargeting_Human_0593	1	0.25517	0.25504	0.999997	371	1	-0.51324	0.74483	0.7453	0.950563	1497	0	-0.51324
NonTargeting_Human_0661	1	0.25681	0.25664	0.999997	372	1	-0.37933	0.74319	0.74367	0.950563	1495	0	-0.37933
NonTargeting_Human_0785	1	0.25845	0.25851	0.999997	373	1	-0.37237	0.74155	0.74199	0.950563	1494	0	-0.37237
NonTargeting_Human_0487	1	0.25918	0.25918	0.999997	374	1	-0.37301	0.74082	0.74128	0.950563	1493	0	-0.37301
LONP1	15	0.26027	0.5663	0.999997	375	6	-0.23228	0.90493	0.97383	0.999997	1604	3	-0.23228
NonTargeting_Human_0996	1	0.26132	0.26112	0.999997	376	1	-1.0379	0.73868	0.73915	0.950563	1492	0	-1.0379
NonTargeting_Human_0191	1	0.26189	0.26169	0.999997	377	1	-0.51128	0.73811	0.73853	0.950563	1491	0	-0.51128
SBK1	15	0.26292	0.56929	0.999997	378	6	-0.093655	0.066568	0.24419	0.675872	318	6	-0.093655
SAP130	15	0.26482	0.57133	0.999997	379	5	-0.01662	0.72288	0.91432	0.999997	1480	4	-0.01662
NonTargeting_Human_0946	1	0.26542	0.26552	0.999997	380	1	-0.53412	0.73458	0.73485	0.946655	1489	0	-0.53412
NonTargeting_Human_0435	1	0.26771	0.26774	0.999997	381	1	-0.51583	0.73229	0.73262	0.945176	1488	0	-0.51583
NonTargeting_Human_0895	1	0.26927	0.26926	0.999997	382	1	-0.9112	0.73073	0.7311	0.94391	1487	0	-0.9112
KAT8	15	0.27155	0.5788	0.999997	383	5	0.0283	0.023722	0.11305	0.577985	166	4	0.0283
UBE2L3	15	0.27213	0.57952	0.999997	384	6	-0.060905	0.61933	0.86506	0.999997	1364	5	-0.060905
NonTargeting_Human_0531	1	0.27296	0.27282	0.999997	385	1	-0.43854	0.72704	0.72749	0.940642	1484	0	-0.43854
NonTargeting_Human_0522	1	0.27427	0.27414	0.999997	386	1	-0.41832	0.72573	0.7262	0.939983	1483	0	-0.41832
NonTargeting_Human_0725	1	0.2746	0.27451	0.999997	387	1	-0.41528	0.7254	0.72593	0.939983	1482	0	-0.41528
NonTargeting_Human_0773	1	0.27624	0.2761	0.999997	388	1	-0.47701	0.72376	0.72419	0.939147	1481	0	-0.47701
YPEL1	15	0.2776	0.58568	0.999997	389	4	-0.029329	0.50183	0.79991	0.988818	1227	5	-0.029329
NonTargeting_Human_0090	1	0.27862	0.27843	0.999997	390	1	-0.34515	0.72138	0.72159	0.937156	1478	0	-0.34515
NonTargeting_Human_0448	1	0.2796	0.27935	0.999997	391	1	-0.35155	0.7204	0.72061	0.936837	1477	0	-0.35155
NonTargeting_Human_0328	1	0.28223	0.28189	0.999997	392	1	-0.38034	0.71777	0.71814	0.935467	1476	0	-0.38034
NonTargeting_Human_0752	1	0.28231	0.28195	0.999997	393	1	-0.33244	0.71769	0.71805	0.935467	1475	0	-0.33244
CLK2	15	0.28358	0.59259	0.999997	394	3	0.06176	0.20616	0.50589	0.803115	686	6	0.06176
COPS3	15	0.28545	0.59458	0.999997	395	5	-0.114	0.9353	0.9821	0.999997	1622	1	-0.114
CACNA1A	15	0.28546	0.59458	0.999997	396	5	0.076775	0.4033	0.72081	0.936837	1073	6	0.076775
GATS	15	0.28693	0.59627	0.999997	397	5	0.064984	0.43507	0.74821	0.950563	1126	6	0.064984
NonTargeting_Human_0633	1	0.28748	0.28713	0.999997	398	1	-0.40175	0.71252	0.71277	0.933316	1471	0	-0.40175
ANKHD1-EIF4EBP3	15	0.28817	0.59749	0.999997	399	6	-0.25276	0.084689	0.28683	0.694809	373	4	-0.25276
FBXL5	15	0.2886	0.59786	0.999997	400	6	-0.047154	0.39864	0.71692	0.935467	1063	4	-0.047154
GOLGA6A	15	0.28915	0.59849	0.999997	401	6	-0.14089	0.38315	0.70314	0.926759	1041	3	-0.14089
NonTargeting_Human_0238	1	0.29035	0.29	0.999997	402	1	-0.43473	0.70965	0.70982	0.930149	1467	0	-0.43473
NonTargeting_Human_0743	1	0.29191	0.2916	0.999997	403	1	-0.2626	0.70809	0.70821	0.928725	1465	0	-0.2626
NonTargeting_Human_0406	1	0.29199	0.2917	0.999997	404	1	-0.34517	0.70801	0.70814	0.928725	1464	0	-0.34517
NonTargeting_Human_0590	1	0.29355	0.2932	0.999997	405	1	-0.53761	0.70645	0.70667	0.928099	1462	0	-0.53761
NonTargeting_Human_0029	1	0.29683	0.2968	0.999997	406	1	-0.46135	0.70317	0.70353	0.926759	1460	0	-0.46135
NonTargeting_Human_0418	1	0.29732	0.2973	0.999997	407	1	-0.35733	0.70268	0.7031	0.926759	1459	0	-0.35733
NonTargeting_Human_0297	1	0.29748	0.29747	0.999997	408	1	-0.20485	0.70252	0.70294	0.926759	1458	0	-0.20485
NonTargeting_Human_0314	1	0.29765	0.29763	0.999997	409	1	-0.37984	0.70235	0.70281	0.926759	1457	0	-0.37984
NonTargeting_Human_0658	1	0.30019	0.30005	0.999997	410	1	-0.49329	0.69981	0.70021	0.926561	1455	0	-0.49329
CPSF2	15	0.30173	0.6119	0.999997	411	5	0.094155	0.85579	0.96195	0.999997	1580	4	0.094155
HMOX2	15	0.30246	0.6126	0.999997	412	5	-0.097645	0.19314	0.48745	0.798128	653	5	-0.097645
CORO1A	15	0.30296	0.61316	0.999997	413	6	-0.0070055	0.57514	0.84035	0.999997	1313	5	-0.0070055
NonTargeting_Human_0205	1	0.30306	0.30285	0.999997	414	1	-0.26886	0.69694	0.69734	0.923468	1449	0	-0.26886
NonTargeting_Human_0538	1	0.30355	0.30329	0.999997	415	1	-0.85413	0.69645	0.69687	0.923468	1448	0	-0.85413
NonTargeting_Human_0973	1	0.30371	0.30343	0.999997	416	1	-0.65349	0.69629	0.69671	0.923468	1446	0	-0.65349
MCM3	15	0.30385	0.61419	0.999997	417	3	-0.031835	0.21135	0.51315	0.808484	697	5	-0.031835
RBM3	15	0.30461	0.61495	0.999997	418	6	0.24697	0.1164	0.35656	0.727625	455	8	0.24697
NonTargeting_Human_0562	1	0.30495	0.30463	0.999997	419	1	-0.60269	0.69505	0.69545	0.923468	1444	0	-0.60269
ZW10	15	0.30562	0.61618	0.999997	420	6	-0.23396	0.76349	0.92838	0.999997	1511	3	-0.23396
NonTargeting_Human_0128	1	0.3065	0.30607	0.999997	421	1	-0.33211	0.6935	0.69402	0.922554	1443	0	-0.33211
GTF2H2	15	0.3073	0.61795	0.999997	422	6	-0.22152	0.33862	0.66325	0.905701	972	3	-0.22152
NonTargeting_Human_0054	1	0.30798	0.30746	0.999997	423	1	-0.2562	0.69202	0.69272	0.921518	1442	0	-0.2562
NonTargeting_Human_0326	1	0.3097	0.30912	0.999997	424	1	-0.26324	0.6903	0.691	0.921428	1441	0	-0.26324
NonTargeting_Human_0366	1	0.30995	0.30936	0.999997	425	1	-0.30582	0.69005	0.69076	0.921428	1440	0	-0.30582
TBC1D22A	15	0.31145	0.62249	0.999997	426	6	0.051254	0.38706	0.70648	0.928099	1051	6	0.051254
NonTargeting_Human_0545	1	0.31167	0.31116	0.999997	427	1	-0.32091	0.68833	0.68884	0.921428	1438	0	-0.32091
WARS	15	0.31167	0.62273	0.999997	428	4	-0.12064	0.62882	0.87011	0.999997	1376	5	-0.12064
COPS8	15	0.3122	0.62331	0.999997	429	6	-0.28623	0.9766	0.99207	0.999997	1655	2	-0.28623
NonTargeting_Human_0751	1	0.31298	0.31249	0.999997	430	1	-0.46466	0.68702	0.68763	0.921428	1435	0	-0.46466
NonTargeting_Human_0817	1	0.31479	0.3142	0.999997	431	1	-0.36118	0.68521	0.68596	0.921428	1434	0	-0.36118
ALG13	15	0.31654	0.62813	0.999997	432	2	0.25057	0.22242	0.52853	0.818731	721	5	0.25057
NonTargeting_Human_0037	1	0.31766	0.31702	0.999997	433	1	-0.27417	0.68234	0.68301	0.91907	1432	0	-0.27417
EWSR1	15	0.32077	0.63259	0.999997	434	6	-0.09573	0.95058	0.98659	0.999997	1634	2	-0.09573
NonTargeting_Human_0600	1	0.3211	0.32072	0.999997	435	1	-0.27243	0.6789	0.67941	0.918048	1427	0	-0.27243
NonTargeting_Human_0870	1	0.32126	0.32086	0.999997	436	1	-0.30116	0.67874	0.67927	0.918048	1426	0	-0.30116
NonTargeting_Human_0018	1	0.32151	0.3211	0.999997	437	1	-0.2463	0.67849	0.67907	0.918048	1425	0	-0.2463
NonTargeting_Human_0987	1	0.32372	0.32336	0.999997	438	1	-0.42875	0.67628	0.67684	0.917105	1423	0	-0.42875
NonTargeting_Human_0811	1	0.32553	0.3251	0.999997	439	1	-0.45538	0.67447	0.67512	0.916194	1421	0	-0.45538
NonTargeting_Human_0535	1	0.33004	0.32963	0.999997	440	1	-0.38815	0.66996	0.67096	0.911263	1419	0	-0.38815
SNAI1	15	0.33014	0.64264	0.999997	441	5	0.042206	0.22063	0.52594	0.816775	717	3	0.042206
NonTargeting_Human_0521	1	0.33078	0.33035	0.999997	442	1	-0.46666	0.66922	0.67033	0.911102	1418	0	-0.46666
NonTargeting_Human_0536	1	0.33193	0.33144	0.999997	443	1	-0.20581	0.66807	0.66923	0.910318	1416	0	-0.20581
NonTargeting_Human_0641	1	0.33414	0.33375	0.999997	444	1	-0.30506	0.66586	0.66684	0.907772	1414	0	-0.30506
PRPF38B	14	0.33601	0.64587	0.999997	445	4	0.13494	0.185	0.47038	0.787119	638	5	0.13494
NonTargeting_Human_0845	1	0.33676	0.33664	0.999997	446	1	-0.31513	0.66324	0.66427	0.906384	1412	0	-0.31513
PRPF6	15	0.33707	0.6497	0.999997	447	6	-0.012092	0.68107	0.8973	0.999997	1430	2	-0.012092
ST6GAL1	15	0.34041	0.65303	0.999997	448	6	0.019053	0.27122	0.59372	0.853752	825	4	0.019053
WBSCR16	15	0.34067	0.65332	0.999997	449	6	-0.25056	0.375	0.69589	0.923468	1028	5	-0.25056
NonTargeting_Human_0614	1	0.34168	0.3418	0.999997	450	0	-0.22073	0.65832	0.65964	0.902177	1408	0	-0.22073
WDR13	15	0.34221	0.65488	0.999997	451	6	-0.090596	0.94796	0.98576	0.999997	1631	2	-0.090596
NonTargeting_Human_0748	1	0.3457	0.3459	0.999997	452	0	-0.27714	0.6543	0.65564	0.897413	1402	0	-0.27714
NonTargeting_Human_0169	1	0.34603	0.34625	0.999997	453	0	-0.49032	0.65397	0.65532	0.897413	1401	0	-0.49032
NonTargeting_Human_0927	1	0.34644	0.3466	0.999997	454	0	-0.26341	0.65356	0.65488	0.897413	1400	0	-0.26341
NonTargeting_Human_0886	1	0.34751	0.3476	0.999997	455	0	-0.34803	0.65249	0.65388	0.897413	1399	0	-0.34803
NUDT17	15	0.34815	0.66087	0.999997	456	6	-0.080769	0.25365	0.57072	0.844199	784	4	-0.080769
NonTargeting_Human_0102	1	0.34857	0.34869	0.999997	457	0	-0.25259	0.65143	0.6529	0.897413	1398	0	-0.25259
NonTargeting_Human_0844	1	0.35079	0.35089	0.999997	458	0	-0.3615	0.64921	0.65078	0.896355	1396	0	-0.3615
NonTargeting_Human_0279	1	0.35407	0.35419	0.999997	459	0	-0.23834	0.64593	0.64742	0.894536	1394	0	-0.23834
MRPL21	15	0.35462	0.66773	0.999997	460	6	0.22322	0.070684	0.25415	0.67886	336	8	0.22322
NonTargeting_Human_0046	1	0.35661	0.35661	0.999997	461	0	-0.28846	0.64339	0.64473	0.892235	1392	0	-0.28846
NonTargeting_Human_0347	1	0.35809	0.35807	0.999997	462	0	-0.19421	0.64191	0.64322	0.891555	1391	0	-0.19421
EIF3C	14	0.36019	0.66609	0.999997	463	4	0.11641	0.65728	0.87921	0.999997	1405	4	0.11641
TMEM134	15	0.36113	0.67449	0.999997	464	6	0.075415	0.85017	0.95975	0.999997	1575	2	0.075415
NonTargeting_Human_0411	1	0.36219	0.362	0.999997	465	0	-0.23145	0.63781	0.63908	0.886515	1389	0	-0.23145
NonTargeting_Human_0667	1	0.36522	0.36508	0.999997	466	0	-0.23509	0.63478	0.63595	0.88428	1387	0	-0.23509
LAMTOR4	15	0.36686	0.68036	0.999997	467	6	-0.032805	0.56279	0.83326	0.999997	1298	3	-0.032805
KTI12	15	0.36897	0.68249	0.999997	468	6	-0.018064	0.47726	0.78237	0.98118	1189	5	-0.018064
NonTargeting_Human_0441	1	0.36965	0.36966	0.999997	469	0	-0.35245	0.63035	0.6316	0.878927	1380	0	-0.35245
NonTargeting_Human_0325	1	0.37022	0.37014	0.999997	470	0	-0.22246	0.62978	0.63091	0.878658	1379	0	-0.22246
NonTargeting_Human_0572	1	0.37096	0.37088	0.999997	471	0	-0.17379	0.62904	0.63013	0.87827	1377	0	-0.17379
NonTargeting_Human_0899	1	0.37236	0.3723	0.999997	472	0	-0.23459	0.62764	0.62863	0.876872	1375	0	-0.23459
RPS8	15	0.37289	0.68631	0.999997	473	3	-0.033095	0.69771	0.90612	0.999997	1452	4	-0.033095
STX10	15	0.37367	0.68702	0.999997	474	4	-0.084994	0.93578	0.98224	0.999997	1623	3	-0.084994
NonTargeting_Human_0604	1	0.37441	0.37452	0.999997	475	0	-0.18672	0.62559	0.62648	0.874573	1372	0	-0.18672
CPSF3L	15	0.37606	0.6894	0.999997	476	6	-0.18226	0.85638	0.9621	0.999997	1581	4	-0.18226
NonTargeting_Human_0740	1	0.37777	0.37777	0.999997	477	0	-0.26146	0.62223	0.62298	0.873208	1370	0	-0.26146
NonTargeting_Human_0345	1	0.37801	0.37805	0.999997	478	0	-0.18758	0.62199	0.62273	0.873208	1369	0	-0.18758
NonTargeting_Human_0216	1	0.3781	0.37813	0.999997	479	0	-0.31302	0.6219	0.62264	0.873208	1368	0	-0.31302
NonTargeting_Human_0322	1	0.37998	0.38015	0.999997	480	0	-0.16719	0.62002	0.62063	0.873208	1365	0	-0.16719
SSX2	15	0.38027	0.69358	0.999997	481	6	0.011717	0.4545	0.76386	0.96418	1152	2	0.011717
NonTargeting_Human_0567	1	0.38121	0.38146	0.999997	482	0	-0.15725	0.61879	0.61944	0.873099	1363	0	-0.15725
NonTargeting_Human_0511	1	0.38162	0.382	0.999997	483	0	-0.16317	0.61838	0.61907	0.873099	1362	0	-0.16317
NonTargeting_Human_0636	1	0.3817	0.38204	0.999997	484	0	-0.29992	0.6183	0.61898	0.873099	1361	0	-0.29992
NonTargeting_Human_0825	1	0.38195	0.38228	0.999997	485	0	-0.2094	0.61805	0.61876	0.873099	1360	0	-0.2094
COG5	15	0.38244	0.69583	0.999997	486	5	0.1058	0.20206	0.50005	0.801541	676	5	0.1058
WDR33	15	0.3829	0.69629	0.999997	487	6	-0.31941	0.0042968	0.028044	0.355501	90	3	-0.31941
FUNDC2	15	0.38317	0.69658	0.999997	488	6	0.20905	0.20202	0.5	0.801541	675	7	0.20905
NonTargeting_Human_0299	1	0.38777	0.38819	0.999997	489	0	-0.26494	0.61223	0.61284	0.868546	1358	0	-0.26494
NonTargeting_Human_0734	1	0.38917	0.38958	0.999997	490	0	-0.16991	0.61083	0.61147	0.867451	1356	0	-0.16991
HNRNPM	15	0.39094	0.70431	0.999997	491	2	0.16766	0.081723	0.27989	0.694111	362	5	0.16766
NonTargeting_Human_0047	1	0.39278	0.39317	0.999997	492	0	-0.14468	0.60722	0.6079	0.864484	1355	0	-0.14468
PON1	15	0.39319	0.70669	0.999997	493	4	0.10352	0.35328	0.67653	0.917105	989	5	0.10352
LSM7	15	0.39321	0.7067	0.999997	494	6	-0.22732	0.98875	0.9958	0.999997	1673	2	-0.22732
NonTargeting_Human_0921	1	0.39417	0.3945	0.999997	495	0	-0.28856	0.60583	0.60653	0.863934	1352	0	-0.28856
NonTargeting_Human_0510	1	0.39425	0.39459	0.999997	496	0	-0.12208	0.60575	0.60647	0.863934	1351	0	-0.12208
NonTargeting_Human_0083	1	0.39622	0.39639	0.999997	497	0	-0.11084	0.60378	0.60451	0.863165	1349	0	-0.11084
NonTargeting_Human_0771	1	0.40171	0.4018	0.999997	498	0	-0.23798	0.59829	0.59872	0.856298	1346	0	-0.23798
SHC1	15	0.40272	0.71403	0.999997	499	5	-0.1271	0.66103	0.88684	0.999997	1411	3	-0.1271
NonTargeting_Human_0592	1	0.40426	0.4041	0.999997	500	0	-0.088704	0.59574	0.59611	0.854136	1344	0	-0.088704
NonTargeting_Human_0227	1	0.4054	0.40538	0.999997	501	0	-0.1521	0.5946	0.59499	0.853752	1341	0	-0.1521
NonTargeting_Human_0985	1	0.40549	0.40549	0.999997	502	0	-0.16479	0.59451	0.59489	0.853752	1340	0	-0.16479
NonTargeting_Human_0741	1	0.40557	0.40556	0.999997	503	0	-0.12109	0.59443	0.5948	0.853752	1339	0	-0.12109
EIF2S2	15	0.40625	0.71657	0.999997	504	3	0.3425	0.0018436	0.013182	0.306097	64	9	0.3425
NonTargeting_Human_0788	1	0.40688	0.40692	0.999997	505	0	-0.11598	0.59312	0.59356	0.853752	1338	0	-0.11598
ORMDL1	15	0.40737	0.71741	0.999997	506	3	0.18004	0.32991	0.6556	0.897413	950	6	0.18004
NonTargeting_Human_0220	1	0.40819	0.40832	0.999997	507	0	-0.10334	0.59181	0.59223	0.853752	1337	0	-0.10334
NonTargeting_Human_0159	1	0.4086	0.40876	0.999997	508	0	-0.18798	0.5914	0.59181	0.853752	1336	0	-0.18798
NonTargeting_Human_0896	1	0.40975	0.40998	0.999997	509	0	-0.12176	0.59025	0.59077	0.853285	1334	0	-0.12176
NonTargeting_Human_0065	1	0.41024	0.4105	0.999997	510	0	-0.094423	0.58976	0.59026	0.853246	1332	0	-0.094423
NonTargeting_Human_0923	1	0.41147	0.41157	0.999997	511	0	-0.13862	0.58853	0.58893	0.85288	1331	0	-0.13862
NonTargeting_Human_0250	1	0.4118	0.41187	0.999997	512	0	-0.086483	0.5882	0.5886	0.85288	1330	0	-0.086483
NonTargeting_Human_0841	1	0.41254	0.41259	0.999997	513	0	-0.15394	0.58746	0.58794	0.85288	1329	0	-0.15394
NonTargeting_Human_0473	1	0.41369	0.4138	0.999997	514	0	-0.14913	0.58631	0.58682	0.85288	1327	0	-0.14913
NonTargeting_Human_0907	1	0.41459	0.41469	0.999997	515	0	-0.17181	0.58541	0.58589	0.852558	1325	0	-0.17181
NonTargeting_Human_0573	1	0.41484	0.41492	0.999997	516	0	-0.11947	0.58516	0.58562	0.852558	1324	0	-0.11947
NonTargeting_Human_0611	1	0.41549	0.4156	0.999997	517	0	-0.10202	0.58451	0.5849	0.852558	1323	0	-0.10202
NonTargeting_Human_0064	1	0.4159	0.41601	0.999997	518	0	-0.14384	0.5841	0.5845	0.852558	1322	0	-0.14384
PPAT	15	0.41638	0.72401	0.999997	519	3	-0.12412	0.10904	0.34085	0.719474	435	1	-0.12412
NonTargeting_Human_0091	1	0.41648	0.41652	0.999997	520	0	-0.090513	0.58352	0.58404	0.852558	1321	0	-0.090513
NonTargeting_Human_0453	1	0.41762	0.41781	0.999997	521	0	-0.17518	0.58238	0.58288	0.852558	1320	0	-0.17518
NonTargeting_Human_0953	1	0.41926	0.41955	0.999997	522	0	-0.1407	0.58074	0.5812	0.852558	1319	0	-0.1407
NonTargeting_Human_0189	1	0.42	0.42026	0.999997	523	0	-0.098044	0.58	0.58056	0.852558	1317	0	-0.098044
BTF3	15	0.4205	0.72692	0.999997	524	4	0.33234	0.13742	0.4002	0.75891	514	7	0.33234
NonTargeting_Human_0157	1	0.42115	0.42133	0.999997	525	0	-0.11754	0.57885	0.57928	0.851423	1316	0	-0.11754
NonTargeting_Human_0230	1	0.42222	0.42228	0.999997	526	0	-0.10542	0.57778	0.57807	0.850367	1315	0	-0.10542
CCDC53	15	0.4236	0.72919	0.999997	527	5	0.12637	0.27318	0.59624	0.854136	830	5	0.12637
PKD1	15	0.42488	0.7301	0.999997	528	2	0.22166	0.06145	0.23194	0.662205	306	8	0.22166
NonTargeting_Human_0675	1	0.42828	0.42806	0.999997	529	0	-0.095234	0.57172	0.57189	0.844199	1310	0	-0.095234
NonTargeting_Human_0843	1	0.42853	0.42828	0.999997	530	0	-0.083614	0.57147	0.57164	0.844199	1309	0	-0.083614
NonTargeting_Human_0710	1	0.42878	0.42855	0.999997	531	0	-0.10714	0.57122	0.57138	0.844199	1308	0	-0.10714
NonTargeting_Human_0703	1	0.42894	0.42873	0.999997	532	0	-0.13156	0.57106	0.57125	0.844199	1307	0	-0.13156
NonTargeting_Human_0981	1	0.4291	0.4289	0.999997	533	0	-0.14587	0.5709	0.5711	0.844199	1306	0	-0.14587
NonTargeting_Human_1000	1	0.42976	0.42952	0.999997	534	0	-0.076921	0.57024	0.57045	0.844199	1304	0	-0.076921
NonTargeting_Human_0813	1	0.43001	0.4298	0.999997	535	0	-0.097878	0.56999	0.57019	0.844199	1303	0	-0.097878
NonTargeting_Human_0911	1	0.43386	0.43363	0.999997	536	0	-0.14574	0.56614	0.56633	0.842993	1301	0	-0.14574
NonTargeting_Human_0371	1	0.43402	0.43382	0.999997	537	0	-0.082391	0.56598	0.56612	0.842993	1300	0	-0.082391
TCP10	15	0.43435	0.73697	0.999997	538	3	0.29053	0.034592	0.15057	0.60978	214	9	0.29053
NonTargeting_Human_0569	1	0.4355	0.43538	0.999997	539	0	-0.11432	0.5645	0.56465	0.842389	1299	0	-0.11432
NonTargeting_Human_0419	1	0.43796	0.43777	0.999997	540	0	-0.11171	0.56204	0.56205	0.840194	1297	0	-0.11171
HSD17B10	15	0.43867	0.73989	0.999997	541	5	-0.15666	0.27213	0.59496	0.853752	827	2	-0.15666
HTRA2	15	0.43971	0.74053	0.999997	542	5	-0.15205	0.8042	0.94275	0.999997	1537	3	-0.15205
NonTargeting_Human_0259	1	0.44009	0.4398	0.999997	543	0	-0.073841	0.55991	0.55976	0.837488	1296	0	-0.073841
NonTargeting_Human_0949	1	0.44091	0.44062	0.999997	544	0	-0.067566	0.55909	0.55895	0.837488	1295	0	-0.067566
ATP5I	15	0.44156	0.74188	0.999997	545	5	-0.070951	0.42996	0.74378	0.950563	1112	5	-0.070951
KLC2	15	0.44354	0.74317	0.999997	546	3	0.22854	0.35787	0.68068	0.91806	1001	4	0.22854
NonTargeting_Human_0795	1	0.44387	0.4437	0.999997	547	0	-0.091779	0.55613	0.55597	0.834674	1294	0	-0.091779
NonTargeting_Human_0904	1	0.4446	0.44452	0.999997	548	0	-0.076726	0.5554	0.55517	0.834184	1293	0	-0.076726
NonTargeting_Human_0850	1	0.44469	0.44462	0.999997	549	0	-0.07341	0.55531	0.5551	0.834184	1292	0	-0.07341
NonTargeting_Human_0381	1	0.44526	0.44513	0.999997	550	0	-0.061958	0.55474	0.55439	0.834184	1291	0	-0.061958
NonTargeting_Human_0030	1	0.44567	0.44552	0.999997	551	0	-0.060964	0.55433	0.55401	0.834184	1290	0	-0.060964
NonTargeting_Human_0491	1	0.44657	0.44642	0.999997	552	0	-0.081148	0.55343	0.55303	0.833835	1289	0	-0.081148
RTBDN	15	0.44811	0.74617	0.999997	553	5	-0.19191	0.8136	0.94623	0.999997	1554	4	-0.19191
NonTargeting_Human_0312	1	0.44813	0.44801	0.999997	554	0	-0.094356	0.55187	0.55147	0.833045	1288	0	-0.094356
NonTargeting_Human_0207	1	0.45059	0.45028	0.999997	555	0	-0.054809	0.54941	0.54896	0.83108	1287	0	-0.054809
NonTargeting_Human_0709	1	0.45166	0.4514	0.999997	556	0	-0.064196	0.54834	0.54787	0.83108	1285	0	-0.064196
CCT6B	15	0.45188	0.74872	0.999997	557	4	0.53447	0.001241	0.0093839	0.258431	59	10	0.53447
NonTargeting_Human_0643	1	0.45321	0.45296	0.999997	558	0	-0.083514	0.54679	0.54641	0.830279	1284	0	-0.083514
NonTargeting_Human_0763	1	0.45444	0.45427	0.999997	559	0	-0.067402	0.54556	0.54513	0.829058	1283	0	-0.067402
NonTargeting_Human_0668	1	0.45485	0.45471	0.999997	560	0	-0.045599	0.54515	0.54465	0.829038	1282	0	-0.045599
NonTargeting_Human_0950	1	0.45641	0.45627	0.999997	561	0	-0.061704	0.54359	0.54294	0.827879	1281	0	-0.061704
NonTargeting_Human_0769	1	0.45723	0.45705	0.999997	562	0	-0.041597	0.54277	0.54211	0.827332	1280	0	-0.041597
NonTargeting_Human_0784	1	0.45732	0.45714	0.999997	563	0	-0.046374	0.54268	0.542	0.827332	1279	0	-0.046374
NonTargeting_Human_0853	1	0.45871	0.45844	0.999997	564	0	-0.042193	0.54129	0.54064	0.82653	1278	0	-0.042193
NonTargeting_Human_0882	1	0.45887	0.45861	0.999997	565	0	-0.059705	0.54113	0.54051	0.82653	1277	0	-0.059705
NonTargeting_Human_0925	1	0.45994	0.45974	0.999997	566	0	-0.060609	0.54006	0.53944	0.82653	1275	0	-0.060609
KDM8	15	0.46313	0.75649	0.999997	567	5	0.059811	0.066122	0.2431	0.674011	316	7	0.059811
NonTargeting_Human_0384	1	0.46379	0.46383	0.999997	568	0	-0.028078	0.53621	0.53549	0.822246	1272	0	-0.028078
NonTargeting_Human_0634	1	0.46412	0.46416	0.999997	569	0	-0.030141	0.53588	0.5352	0.822246	1271	0	-0.030141
NonTargeting_Human_0121	1	0.46461	0.46465	0.999997	570	0	-0.038546	0.53539	0.53466	0.822246	1270	0	-0.038546
NonTargeting_Human_0234	1	0.4647	0.46472	0.999997	571	0	-0.025666	0.5353	0.53458	0.822246	1269	0	-0.025666
NonTargeting_Human_0736	1	0.46568	0.46564	0.999997	572	0	-0.029676	0.53432	0.53358	0.822196	1268	0	-0.029676
NonTargeting_Human_0608	1	0.46691	0.46667	0.999997	573	0	-0.029929	0.53309	0.53245	0.821176	1266	0	-0.029929
SNAPC3	15	0.46924	0.76074	0.999997	574	4	-0.025438	0.70226	0.9077	0.999997	1456	4	-0.025438
NonTargeting_Human_0770	1	0.47035	0.47015	0.999997	575	0	-0.026888	0.52965	0.52926	0.819136	1264	0	-0.026888
CDK12	15	0.47214	0.76273	0.999997	576	1	0.056249	0.25456	0.57195	0.844199	787	5	0.056249
NonTargeting_Human_0009	1	0.47298	0.47285	0.999997	577	0	-0.021497	0.52702	0.52668	0.816775	1262	0	-0.021497
NonTargeting_Human_0310	1	0.47355	0.47335	0.999997	578	0	-0.021929	0.52645	0.52619	0.816775	1261	0	-0.021929
NonTargeting_Human_0967	1	0.47421	0.47404	0.999997	579	0	-0.022352	0.52579	0.52552	0.816775	1260	0	-0.022352
NonTargeting_Human_0883	1	0.47478	0.47468	0.999997	580	0	-0.018837	0.52522	0.52505	0.816775	1259	0	-0.018837
NonTargeting_Human_0195	1	0.47519	0.4751	0.999997	581	0	-0.015377	0.52481	0.52465	0.816775	1258	0	-0.015377
NonTargeting_Human_0738	1	0.47544	0.4753	0.999997	582	0	-0.020104	0.52456	0.52446	0.816775	1257	0	-0.020104
NonTargeting_Human_0431	1	0.47667	0.47657	0.999997	583	0	-0.016812	0.52333	0.52315	0.816775	1256	0	-0.016812
NonTargeting_Human_0961	1	0.47716	0.47704	0.999997	584	0	-0.016652	0.52284	0.52257	0.816775	1255	0	-0.016652
NonTargeting_Human_0999	1	0.47864	0.47846	0.999997	585	0	-0.011209	0.52136	0.52101	0.815991	1254	0	-0.011209
NonTargeting_Human_0461	1	0.47929	0.47906	0.999997	586	0	-0.0065579	0.52071	0.52029	0.815991	1253	0	-0.0065579
NonTargeting_Human_0005	1	0.48143	0.48111	0.999997	587	0	-0.0036519	0.51857	0.51814	0.813429	1252	0	-0.0036519
NonTargeting_Human_0749	1	0.48348	0.48318	0.999997	588	0	-0.0020607	0.51652	0.51612	0.81098	1249	0	-0.0020607
NonTargeting_Human_0766	1	0.48462	0.48445	0.999997	589	0	0.00043506	0.51538	0.51504	0.810001	1247	0	0.00043506
NonTargeting_Human_0989	1	0.48512	0.48502	0.999997	590	0	0.0028103	0.51488	0.51447	0.80984	1246	0	0.0028103
NonTargeting_Human_0836	1	0.48676	0.48655	0.999997	591	0	0.0099866	0.51324	0.51291	0.808484	1245	0	0.0099866
NonTargeting_Human_0007	1	0.4879	0.48781	0.999997	592	0	0.0075881	0.5121	0.51184	0.807881	1244	0	0.0075881
MRPS21	15	0.48797	0.77391	0.999997	593	5	-0.12435	0.12562	0.37594	0.742957	485	6	-0.12435
PQBP1	15	0.48826	0.77411	0.999997	594	4	0.15024	0.31195	0.63877	0.886515	911	6	0.15024
NonTargeting_Human_0672	1	0.48897	0.48881	0.999997	595	0	0.0095562	0.51103	0.51079	0.80694	1242	0	0.0095562
NonTargeting_Human_0214	1	0.48938	0.48912	0.999997	596	0	0.0090288	0.51062	0.51041	0.80694	1241	0	0.0090288
NonTargeting_Human_0758	1	0.49069	0.49047	0.999997	597	0	0.012349	0.50931	0.50916	0.805831	1239	0	0.012349
NonTargeting_Human_0676	1	0.49086	0.49067	0.999997	598	0	0.014182	0.50914	0.50894	0.805831	1238	0	0.014182
NonTargeting_Human_0549	1	0.49184	0.49158	0.999997	599	0	0.016257	0.50816	0.50791	0.8053	1237	0	0.016257
NonTargeting_Human_0625	1	0.49364	0.49342	0.999997	600	0	0.019585	0.50636	0.50607	0.803115	1236	0	0.019585
NonTargeting_Human_0247	1	0.49414	0.49387	0.999997	601	0	0.018628	0.50586	0.5056	0.803115	1235	0	0.018628
NonTargeting_Human_0003	1	0.4943	0.49404	0.999997	602	0	0.024198	0.5057	0.50545	0.803115	1234	0	0.024198
TRA2B	15	0.49435	0.77851	0.999997	603	2	0.077908	0.068976	0.24996	0.677904	329	6	0.077908
NonTargeting_Human_0500	1	0.49471	0.49452	0.999997	604	0	0.020999	0.50529	0.50499	0.803115	1233	0	0.020999
NonTargeting_Human_0809	1	0.49578	0.49557	0.999997	605	0	0.029673	0.50422	0.50392	0.803115	1232	0	0.029673
NonTargeting_Human_0274	1	0.49635	0.49613	0.999997	606	0	0.0207	0.50365	0.50342	0.803115	1230	0	0.0207
NonTargeting_Human_0492	1	0.49643	0.49621	0.999997	607	0	0.014551	0.50357	0.50333	0.803115	1229	0	0.014551
NonTargeting_Human_0501	1	0.50045	0.50022	0.999997	608	0	0.030887	0.49955	0.4994	0.801541	1226	0	0.030887
NonTargeting_Human_0369	1	0.50053	0.5003	0.999997	609	0	0.023543	0.49947	0.49929	0.801541	1225	0	0.023543
NonTargeting_Human_0410	1	0.50086	0.5007	0.999997	610	0	0.047672	0.49914	0.49893	0.801541	1224	0	0.047672
NonTargeting_Human_0556	1	0.50135	0.50121	0.999997	611	0	0.02618	0.49865	0.49836	0.801541	1223	0	0.02618
NonTargeting_Human_0001	1	0.50144	0.50127	0.999997	612	0	0.025219	0.49856	0.49828	0.801541	1221	0	0.025219
NonTargeting_Human_0652	1	0.50275	0.50261	0.999997	613	0	0.035324	0.49725	0.49704	0.801541	1219	0	0.035324
NonTargeting_Human_0069	1	0.50299	0.50281	0.999997	614	0	0.025439	0.49701	0.49683	0.801541	1218	0	0.025439
NonTargeting_Human_0858	1	0.50349	0.50326	0.999997	615	0	0.029598	0.49651	0.49629	0.801541	1216	0	0.029598
NonTargeting_Human_0445	1	0.50455	0.50421	0.999997	616	0	0.04899	0.49545	0.49522	0.801541	1215	0	0.04899
C2orf49	15	0.50509	0.78577	0.999997	617	5	0.062902	0.6646	0.88886	0.999997	1413	5	0.062902
NonTargeting_Human_0683	1	0.50586	0.5056	0.999997	618	0	0.034232	0.49414	0.49387	0.801541	1213	0	0.034232
NonTargeting_Human_0835	1	0.50668	0.5064	0.999997	619	0	0.049861	0.49332	0.49301	0.801541	1211	0	0.049861
NonTargeting_Human_0365	1	0.5089	0.50869	0.999997	620	0	0.031972	0.4911	0.49093	0.800097	1210	0	0.031972
NonTargeting_Human_0800	1	0.51021	0.51	0.999997	621	0	0.052292	0.48979	0.48952	0.798546	1208	0	0.052292
NonTargeting_Human_0352	1	0.51103	0.51079	0.999997	622	0	0.034263	0.48897	0.48881	0.798128	1207	0	0.034263
NonTargeting_Human_0992	1	0.51128	0.51107	0.999997	623	0	0.060725	0.48872	0.48862	0.798128	1206	0	0.060725
NonTargeting_Human_0414	1	0.51177	0.51157	0.999997	624	0	0.035144	0.48823	0.48811	0.798128	1203	0	0.035144
NonTargeting_Human_0514	1	0.51185	0.51164	0.999997	625	0	0.050973	0.48815	0.48803	0.798128	1202	0	0.050973
CWC22	15	0.51263	0.79112	0.999997	626	3	0.11415	0.03568	0.15423	0.616252	217	7	0.11415
NonTargeting_Human_0140	1	0.51349	0.51321	0.999997	627	0	0.035852	0.48651	0.48629	0.797897	1200	0	0.035852
NonTargeting_Human_0998	1	0.51431	0.51401	0.999997	628	0	0.036643	0.48569	0.48555	0.797897	1198	0	0.036643
NonTargeting_Human_0474	1	0.5148	0.5144	0.999997	629	0	0.059064	0.4852	0.48508	0.797897	1197	0	0.059064
NonTargeting_Human_0374	1	0.51652	0.51612	0.999997	630	0	0.039107	0.48348	0.48318	0.795611	1196	0	0.039107
NonTargeting_Human_0025	1	0.5171	0.51667	0.999997	631	0	0.060625	0.4829	0.48264	0.795474	1195	0	0.060625
NonTargeting_Human_0223	1	0.51833	0.51795	0.999997	632	0	0.062495	0.48167	0.48139	0.794163	1194	0	0.062495
NonTargeting_Human_0730	1	0.51923	0.51878	0.999997	633	0	0.04878	0.48077	0.48042	0.793614	1192	0	0.04878
ARGLU1	15	0.52057	0.79649	0.999997	634	4	-0.11269	0.59601	0.85228	0.999997	1345	3	-0.11269
NonTargeting_Human_0152	1	0.52218	0.52197	0.999997	635	0	0.050698	0.47782	0.47766	0.790242	1191	0	0.050698
NonTargeting_Human_0995	1	0.52227	0.52203	0.999997	636	0	0.072001	0.47773	0.47758	0.790242	1190	0	0.072001
NLRP8	15	0.52259	0.7978	0.999997	637	2	0.037325	0.3956	0.71416	0.934431	1058	6	0.037325
S100A14	15	0.52296	0.79809	0.999997	638	3	-0.038653	0.59525	0.85191	0.999997	1343	4	-0.038653
NonTargeting_Human_0488	1	0.52407	0.52395	0.999997	639	0	0.046174	0.47593	0.47575	0.788562	1188	0	0.046174
NonTargeting_Human_0351	1	0.5244	0.5243	0.999997	640	0	0.06482	0.4756	0.47545	0.788562	1187	0	0.06482
NonTargeting_Human_0330	1	0.52448	0.5244	0.999997	641	0	0.058615	0.47552	0.47535	0.788562	1186	0	0.058615
NonTargeting_Human_0137	1	0.52571	0.52546	0.999997	642	0	0.05574	0.47429	0.47409	0.788562	1184	0	0.05574
NonTargeting_Human_0346	1	0.52579	0.52552	0.999997	643	0	0.05821	0.47421	0.47404	0.788562	1183	0	0.05821
NonTargeting_Human_0058	1	0.52596	0.52567	0.999997	644	0	0.058081	0.47404	0.47392	0.788562	1182	0	0.058081
NonTargeting_Human_0639	1	0.52727	0.52689	0.999997	645	0	0.055507	0.47273	0.47263	0.788562	1181	0	0.055507
G6PC	15	0.52792	0.80118	0.999997	646	5	0.015133	0.066138	0.24314	0.674011	317	3	0.015133
NonTargeting_Human_0988	1	0.5312	0.53069	0.999997	647	0	0.088954	0.4688	0.46852	0.785155	1180	0	0.088954
NonTargeting_Human_0294	1	0.53137	0.53085	0.999997	648	0	0.083962	0.46863	0.4684	0.785155	1179	0	0.083962
NonTargeting_Human_0481	1	0.53194	0.53145	0.999997	649	0	0.064611	0.46806	0.46784	0.785155	1178	0	0.064611
NonTargeting_Human_0830	1	0.53268	0.53207	0.999997	650	0	0.095012	0.46732	0.46708	0.785155	1177	0	0.095012
NonTargeting_Human_0098	1	0.53309	0.53245	0.999997	651	0	0.05837	0.46691	0.46667	0.785155	1176	0	0.05837
MKL1	15	0.53401	0.80531	0.999997	652	5	-0.2497	0.82163	0.94889	0.999997	1557	4	-0.2497
NonTargeting_Human_0187	1	0.53514	0.53441	0.999997	653	0	0.099139	0.46486	0.46485	0.783841	1175	0	0.099139
NonTargeting_Human_0209	1	0.53522	0.53449	0.999997	654	0	0.09066	0.46478	0.46477	0.783841	1174	0	0.09066
ADAMTSL1	15	0.53563	0.80646	0.999997	655	3	0.32966	0.060555	0.22978	0.662205	301	8	0.32966
NonTargeting_Human_0756	1	0.53571	0.53506	0.999997	656	0	0.060765	0.46429	0.46433	0.783841	1173	0	0.060765
FRG2C	15	0.53583	0.8066	0.999997	657	3	0.3242	0.081289	0.27891	0.694111	361	8	0.3242
STXBP5L	15	0.53623	0.80684	0.999997	658	3	0.16346	0.63339	0.87257	0.999997	1384	5	0.16346
NonTargeting_Human_0873	1	0.53653	0.53585	0.999997	659	0	0.0628	0.46347	0.46348	0.783808	1172	0	0.0628
NonTargeting_Human_0857	1	0.54006	0.53944	0.999997	660	0	0.12757	0.45994	0.45974	0.779729	1169	0	0.12757
NonTargeting_Human_0544	1	0.54014	0.53954	0.999997	661	0	0.10419	0.45986	0.45965	0.779729	1168	0	0.10419
ACTR6	15	0.54026	0.80966	0.999997	662	5	-0.07123	0.066841	0.24488	0.675973	322	6	-0.07123
RPP38	15	0.54062	0.80991	0.999997	663	5	-0.10987	0.85116	0.96017	0.999997	1576	4	-0.10987
NonTargeting_Human_0561	1	0.54186	0.54121	0.999997	664	0	0.080183	0.45814	0.45783	0.778761	1167	0	0.080183
HIST2H2AA3	15	0.54196	0.81065	0.999997	665	4	0.018838	0.2748	0.59836	0.856298	834	7	0.018838
NonTargeting_Human_0893	1	0.54236	0.54169	0.999997	666	0	0.11825	0.45764	0.45746	0.778761	1166	0	0.11825
NonTargeting_Human_0840	1	0.54268	0.542	0.999997	667	0	0.064845	0.45732	0.45714	0.778761	1165	0	0.064845
NonTargeting_Human_0085	1	0.54277	0.54211	0.999997	668	0	0.1042	0.45723	0.45705	0.778761	1164	0	0.1042
NonTargeting_Human_0986	1	0.54285	0.5422	0.999997	669	0	0.083937	0.45715	0.45695	0.778761	1163	0	0.083937
NonTargeting_Human_0974	1	0.54293	0.5423	0.999997	670	0	0.15121	0.45707	0.45686	0.778761	1162	0	0.15121
NonTargeting_Human_0913	1	0.54301	0.54236	0.999997	671	0	0.11146	0.45699	0.45681	0.778761	1161	0	0.11146
ERP44	15	0.54315	0.81148	0.999997	672	3	0.085405	0.14711	0.41746	0.765927	540	6	0.085405
EMC6	15	0.54364	0.81183	0.999997	673	5	-0.044201	0.152	0.42526	0.770464	552	6	-0.044201
NonTargeting_Human_0865	1	0.54367	0.54304	0.999997	674	0	0.084316	0.45633	0.45619	0.778761	1160	0	0.084316
NonTargeting_Human_0578	1	0.54392	0.54327	0.999997	675	0	0.1441	0.45608	0.45598	0.778761	1159	0	0.1441
NonTargeting_Human_0489	1	0.544	0.5434	0.999997	676	0	0.097612	0.456	0.45589	0.778761	1158	0	0.097612
NonTargeting_Human_0318	1	0.54408	0.54349	0.999997	677	0	0.090819	0.45592	0.45582	0.778761	1157	0	0.090819
NonTargeting_Human_0516	1	0.54424	0.54364	0.999997	678	0	0.12688	0.45576	0.45569	0.778761	1156	0	0.12688
NonTargeting_Human_0930	1	0.54465	0.54411	0.999997	679	0	0.080996	0.45535	0.45526	0.778761	1155	0	0.080996
NonTargeting_Human_0390	1	0.5449	0.54433	0.999997	680	0	0.17046	0.4551	0.455	0.778761	1154	0	0.17046
NonTargeting_Human_0716	1	0.54539	0.54495	0.999997	681	0	0.10613	0.45461	0.45445	0.778761	1153	0	0.10613
NonTargeting_Human_0002	1	0.54564	0.54523	0.999997	682	0	0.10471	0.45436	0.45417	0.778761	1151	0	0.10471
NonTargeting_Human_0755	1	0.54613	0.54582	0.999997	683	0	0.11327	0.45387	0.45358	0.778761	1150	0	0.11327
NonTargeting_Human_0838	1	0.54654	0.54617	0.999997	684	0	0.11167	0.45346	0.45319	0.778761	1149	0	0.11167
NonTargeting_Human_0596	1	0.54679	0.54641	0.999997	685	0	0.11206	0.45321	0.45296	0.778761	1148	0	0.11206
NonTargeting_Human_0655	1	0.54769	0.54721	0.999997	686	0	0.11287	0.45231	0.45207	0.778761	1147	0	0.11287
NonTargeting_Human_0298	1	0.5481	0.54761	0.999997	687	0	0.11322	0.4519	0.45171	0.778761	1146	0	0.11322
NonTargeting_Human_0182	1	0.549	0.54855	0.999997	688	0	0.10418	0.451	0.45069	0.778761	1145	0	0.10418
NonTargeting_Human_0015	1	0.54998	0.54962	0.999997	689	0	0.08483	0.45002	0.44978	0.778761	1144	0	0.08483
NonTargeting_Human_0926	1	0.55048	0.55008	0.999997	690	0	0.19917	0.44952	0.44934	0.778761	1143	0	0.19917
NonTargeting_Human_0359	1	0.55195	0.55159	0.999997	691	0	0.17839	0.44805	0.44793	0.778761	1142	0	0.17839
NonTargeting_Human_0321	1	0.55285	0.55255	0.999997	692	0	0.0946	0.44715	0.44701	0.778761	1140	0	0.0946
NonTargeting_Human_0959	1	0.55531	0.5551	0.999997	693	0	0.09842	0.44469	0.44462	0.778761	1139	0	0.09842
NonTargeting_Human_0862	1	0.5554	0.55517	0.999997	694	0	0.12001	0.4446	0.44452	0.778761	1138	0	0.12001
ALDH3A2	15	0.55599	0.81978	0.999997	695	3	0.10497	0.012356	0.067117	0.483478	122	7	0.10497
PRR20A	15	0.55703	0.82042	0.999997	696	5	0.0071711	0.91378	0.97618	0.999997	1612	3	0.0071711
NonTargeting_Human_0594	1	0.55745	0.55735	0.999997	697	0	0.14062	0.44255	0.44238	0.778761	1136	0	0.14062
NonTargeting_Human_0945	1	0.56114	0.561	0.999997	698	0	0.13901	0.43886	0.43864	0.775469	1134	0	0.13901
NonTargeting_Human_0293	1	0.56155	0.56149	0.999997	699	0	0.13235	0.43845	0.43825	0.775469	1133	0	0.13235
NonTargeting_Human_0183	1	0.56163	0.56157	0.999997	700	0	0.10007	0.43837	0.43819	0.775469	1132	0	0.10007
BID	15	0.56243	0.82405	0.999997	701	4	0.071581	0.34069	0.6651	0.906811	974	5	0.071581
NonTargeting_Human_0935	1	0.56335	0.56343	0.999997	702	0	0.12614	0.43665	0.43642	0.77468	1131	0	0.12614
NonTargeting_Human_0447	1	0.56351	0.56359	0.999997	703	0	0.13036	0.43649	0.43627	0.77468	1130	0	0.13036
IL17RA	15	0.56381	0.82493	0.999997	704	5	0.24929	0.043309	0.17889	0.627993	242	9	0.24929
NonTargeting_Human_0645	1	0.56409	0.5642	0.999997	705	0	0.095853	0.43591	0.43573	0.77468	1129	0	0.095853
NonTargeting_Human_0244	1	0.56442	0.56456	0.999997	706	0	0.11384	0.43558	0.43546	0.77468	1127	0	0.11384
NonTargeting_Human_0186	1	0.56532	0.56543	0.999997	707	0	0.1306	0.43468	0.43448	0.77468	1125	0	0.1306
NonTargeting_Human_0727	1	0.5668	0.56696	0.999997	708	0	0.16766	0.4332	0.433	0.773685	1123	0	0.16766
NonTargeting_Human_0527	1	0.56688	0.56703	0.999997	709	0	0.082178	0.43312	0.43285	0.773685	1122	0	0.082178
NonTargeting_Human_0395	1	0.56876	0.5689	0.999997	710	0	0.14173	0.43124	0.43107	0.772222	1117	0	0.14173
NonTargeting_Human_0829	1	0.56926	0.56941	0.999997	711	0	0.16034	0.43074	0.4306	0.772171	1115	0	0.16034
NonTargeting_Human_0316	1	0.56967	0.56991	0.999997	712	0	0.15877	0.43033	0.43018	0.772171	1113	0	0.15877
NonTargeting_Human_0483	1	0.57024	0.57045	0.999997	713	0	0.22454	0.42976	0.42952	0.772171	1111	0	0.22454
CAPZB	15	0.57107	0.82989	0.999997	714	4	0.14719	0.21892	0.52359	0.816775	716	7	0.14719
MRP63	15	0.57111	0.82995	0.999997	715	5	0.04843	0.80766	0.94394	0.999997	1544	4	0.04843
NonTargeting_Human_0915	1	0.57131	0.57147	0.999997	716	0	0.11779	0.42869	0.42845	0.771468	1110	0	0.11779
NonTargeting_Human_0392	1	0.57213	0.57228	0.999997	717	0	0.1174	0.42787	0.42771	0.770928	1108	0	0.1174
NonTargeting_Human_0824	1	0.57262	0.57281	0.999997	718	0	0.17001	0.42738	0.42724	0.770885	1107	0	0.17001
NonTargeting_Human_0888	1	0.57327	0.5735	0.999997	719	0	0.18612	0.42673	0.42662	0.770547	1106	0	0.18612
NonTargeting_Human_0204	1	0.57377	0.57396	0.999997	720	0	0.13768	0.42623	0.42613	0.770464	1105	0	0.13768
NonTargeting_Human_0932	1	0.57385	0.57404	0.999997	721	0	0.21166	0.42615	0.42604	0.770464	1104	0	0.21166
RNF151	15	0.57488	0.83252	0.999997	722	4	0.082321	0.48825	0.79129	0.985634	1204	5	0.082321
NonTargeting_Human_0934	1	0.57582	0.57598	0.999997	723	0	0.22712	0.42418	0.42415	0.769269	1103	0	0.22712
NonTargeting_Human_0970	1	0.57688	0.57709	0.999997	724	0	0.30859	0.42312	0.42316	0.76826	1102	0	0.30859
NonTargeting_Human_0943	1	0.57737	0.57764	0.999997	725	0	0.24002	0.42263	0.4227	0.768225	1101	0	0.24002
NonTargeting_Human_0956	1	0.5777	0.57797	0.999997	726	0	0.14553	0.4223	0.42237	0.768225	1100	0	0.14553
COMMD2	15	0.57835	0.83462	0.999997	727	5	0.0043658	0.26199	0.58199	0.852558	804	6	0.0043658
NonTargeting_Human_0280	1	0.57836	0.57874	0.999997	728	0	0.13856	0.42164	0.42176	0.768104	1099	0	0.13856
NonTargeting_Human_0631	1	0.57901	0.57941	0.999997	729	0	0.13165	0.42099	0.42116	0.767821	1098	0	0.13165
NonTargeting_Human_0941	1	0.57918	0.57961	0.999997	730	0	0.18947	0.42082	0.421	0.767821	1097	0	0.18947
CEP120	15	0.58016	0.83575	0.999997	731	2	0.075259	0.18019	0.46876	0.785155	628	4	0.075259
NonTargeting_Human_0313	1	0.58123	0.58173	0.999997	732	0	0.11126	0.41877	0.41893	0.766722	1096	0	0.11126
NonTargeting_Human_0028	1	0.58262	0.58314	0.999997	733	0	0.1227	0.41738	0.4175	0.765927	1094	0	0.1227
NonTargeting_Human_0768	1	0.58352	0.58404	0.999997	734	0	0.19667	0.41648	0.41652	0.765737	1093	0	0.19667
NonTargeting_Human_0067	1	0.58451	0.5849	0.999997	735	0	0.15754	0.41549	0.4156	0.765737	1092	0	0.15754
TMEM18	15	0.5848	0.839	0.999997	736	4	0.043197	0.14647	0.41638	0.765737	539	6	0.043197
NonTargeting_Human_0442	1	0.58639	0.58689	0.999997	737	0	0.17066	0.41361	0.41374	0.763821	1091	0	0.17066
NonTargeting_Human_0702	1	0.58697	0.58747	0.999997	738	0	0.1497	0.41303	0.41319	0.763624	1090	0	0.1497
NonTargeting_Human_0852	1	0.5873	0.58776	0.999997	739	0	1.4033	0.4127	0.41278	0.763624	1088	0	1.4033
NonTargeting_Human_0168	1	0.58828	0.58868	0.999997	740	0	0.19401	0.41172	0.41181	0.762675	1087	0	0.19401
NonTargeting_Human_0898	1	0.58877	0.5892	0.999997	741	0	0.25797	0.41123	0.41139	0.762675	1086	0	0.25797
NonTargeting_Human_0155	1	0.58935	0.58978	0.999997	742	0	0.1462	0.41065	0.41089	0.762591	1085	0	0.1462
NonTargeting_Human_0796	1	0.58984	0.59035	0.999997	743	0	0.29644	0.41016	0.41042	0.762518	1084	0	0.29644
NonTargeting_Human_0194	1	0.59041	0.59087	0.999997	744	0	0.19204	0.40959	0.4098	0.762518	1082	0	0.19204
NonTargeting_Human_0617	1	0.59099	0.59147	0.999997	745	0	0.14419	0.40901	0.40924	0.762518	1081	0	0.14419
NonTargeting_Human_0206	1	0.59123	0.59167	0.999997	746	0	0.26058	0.40877	0.4089	0.762518	1080	0	0.26058
NonTargeting_Human_0350	1	0.59197	0.5924	0.999997	747	0	0.19735	0.40803	0.40814	0.762329	1079	0	0.19735
NonTargeting_Human_0918	1	0.5923	0.59275	0.999997	748	0	0.23329	0.4077	0.40789	0.762329	1078	0	0.23329
RNPEP	15	0.59272	0.8446	0.999997	749	5	-0.048201	0.98968	0.99619	0.999997	1676	1	-0.048201
NonTargeting_Human_0051	1	0.59369	0.59403	0.999997	750	0	0.17764	0.40631	0.40635	0.762329	1077	0	0.17764
SMNDC1	15	0.59404	0.84541	0.999997	751	5	-0.098985	0.80724	0.9438	0.999997	1542	1	-0.098985
NonTargeting_Human_0376	1	0.59419	0.59446	0.999997	752	0	0.16753	0.40581	0.40582	0.762329	1075	0	0.16753
ZNRF3	15	0.5951	0.84607	0.999997	753	5	0.28423	0.045393	0.18531	0.632462	251	9	0.28423
SNX1	15	0.59589	0.84655	0.999997	754	5	0.19931	0.23924	0.55156	0.833045	755	6	0.19931
NonTargeting_Human_0571	1	0.59632	0.59669	0.999997	755	0	0.18967	0.40368	0.40358	0.761113	1074	0	0.18967
NonTargeting_Human_0902	1	0.59771	0.59817	0.999997	756	0	0.17001	0.40229	0.40238	0.759672	1072	0	0.17001
SULT6B1	15	0.598	0.84793	0.999997	757	5	0.046552	0.20094	0.4986	0.801541	670	5	0.046552
NonTargeting_Human_0143	1	0.59853	0.59893	0.999997	758	0	0.48398	0.40147	0.40154	0.75891	1071	0	0.48398
NonTargeting_Human_0426	1	0.59886	0.59928	0.999997	759	0	0.19392	0.40114	0.40122	0.75891	1070	0	0.19392
NonTargeting_Human_0588	1	0.59984	0.60038	0.999997	760	0	0.18941	0.40016	0.40025	0.75891	1067	0	0.18941
NonTargeting_Human_0717	1	0.60009	0.60069	0.999997	761	0	0.16924	0.39991	0.40004	0.75891	1066	0	0.16924
ZNF213	15	0.60141	0.85008	0.999997	762	5	0.025503	0.53823	0.82032	0.999247	1273	5	0.025503
NonTargeting_Human_0787	1	0.60255	0.6033	0.999997	763	0	0.25183	0.39745	0.39772	0.758212	1062	0	0.25183
NonTargeting_Human_0425	1	0.60296	0.60372	0.999997	764	0	0.15028	0.39704	0.39722	0.7581	1061	0	0.15028
NonTargeting_Human_0834	1	0.6037	0.60444	0.999997	765	0	0.24265	0.3963	0.39648	0.7581	1060	0	0.24265
NonTargeting_Human_0060	1	0.60403	0.6048	0.999997	766	0	0.14361	0.39597	0.39616	0.7581	1059	0	0.14361
KCNK4	15	0.60712	0.85401	0.999997	767	3	0.060992	0.35667	0.67963	0.918048	997	5	0.060992
SPRN	15	0.60821	0.85476	0.999997	768	5	0.11711	0.014762	0.078064	0.508429	131	7	0.11711
NonTargeting_Human_0100	1	0.60911	0.60987	0.999997	769	0	0.19243	0.39089	0.39125	0.751612	1057	0	0.19243
NonTargeting_Human_0630	1	0.61018	0.61095	0.999997	770	0	0.17271	0.38982	0.39014	0.750296	1056	0	0.17271
RALA	15	0.61136	0.85633	0.999997	771	4	0.15658	0.03149	0.14021	0.604794	202	6	0.15658
NonTargeting_Human_0177	1	0.61141	0.61204	0.999997	772	0	0.21577	0.38859	0.38903	0.748988	1055	0	0.21577
TRAPPC1	15	0.61197	0.85662	0.999997	773	3	-0.088032	0.30961	0.6365	0.884341	908	4	-0.088032
NonTargeting_Human_0694	1	0.61206	0.61266	0.999997	774	0	0.29123	0.38794	0.38832	0.748451	1054	0	0.29123
NonTargeting_Human_0049	1	0.61223	0.61284	0.999997	775	0	0.26413	0.38777	0.38819	0.748451	1053	0	0.26413
NonTargeting_Human_0484	1	0.61239	0.61301	0.999997	776	0	0.19346	0.38761	0.388	0.748451	1052	0	0.19346
NonTargeting_Human_0659	1	0.61305	0.61369	0.999997	777	0	0.24317	0.38695	0.38729	0.748451	1050	0	0.24317
NonTargeting_Human_0665	1	0.6137	0.61436	0.999997	778	0	0.18525	0.3863	0.3866	0.748451	1049	0	0.18525
NonTargeting_Human_0681	1	0.6142	0.61492	0.999997	779	0	0.38212	0.3858	0.3861	0.748451	1048	0	0.38212
NonTargeting_Human_0543	1	0.61452	0.61527	0.999997	780	0	0.20909	0.38548	0.38578	0.748451	1047	0	0.20909
NonTargeting_Human_0439	1	0.61493	0.61567	0.999997	781	0	0.11003	0.38507	0.38539	0.748451	1045	0	0.11003
NonTargeting_Human_0257	1	0.61608	0.61695	0.999997	782	0	0.3175	0.38392	0.38427	0.748047	1043	0	0.3175
NonTargeting_Human_0079	1	0.61674	0.61756	0.999997	783	0	0.18464	0.38326	0.38358	0.747525	1042	0	0.18464
WDHD1	15	0.61687	0.85876	0.999997	784	3	0.18158	0.20459	0.5038	0.803115	684	7	0.18158
NonTargeting_Human_0868	1	0.61698	0.61776	0.999997	785	0	0.22686	0.38302	0.38332	0.747525	1040	0	0.22686
NonTargeting_Human_0146	1	0.61748	0.61822	0.999997	786	0	0.17167	0.38252	0.38295	0.747525	1038	0	0.17167
NonTargeting_Human_0011	1	0.61805	0.61876	0.999997	787	0	0.20697	0.38195	0.38228	0.747486	1037	0	0.20697
NonTargeting_Human_0789	1	0.61813	0.6188	0.999997	788	0	0.28278	0.38187	0.38222	0.747486	1036	0	0.28278
NonTargeting_Human_0732	1	0.61985	0.62043	0.999997	789	0	0.38779	0.38015	0.38031	0.745304	1035	0	0.38779
CCDC178	15	0.6207	0.8603	0.999997	790	4	0.29833	0.056326	0.21876	0.6507	291	9	0.29833
NonTargeting_Human_0436	1	0.62174	0.6225	0.999997	791	0	0.25439	0.37826	0.37826	0.742957	1034	0	0.25439
NonTargeting_Human_0554	1	0.62199	0.62273	0.999997	792	0	0.28604	0.37801	0.37805	0.742957	1033	0	0.28604
NonTargeting_Human_0271	1	0.62207	0.62279	0.999997	793	0	0.22643	0.37793	0.37798	0.742957	1032	0	0.22643
ICA1L	15	0.62245	0.86107	0.999997	794	3	0.34045	0.049959	0.19884	0.644891	263	8	0.34045
NonTargeting_Human_0180	1	0.62281	0.62352	0.999997	795	0	0.17324	0.37719	0.37726	0.742957	1031	0	0.17324
PPP1R8	15	0.62311	0.86139	0.999997	796	4	-0.12956	0.49861	0.79817	0.988269	1222	2	-0.12956
DPY30	15	0.62342	0.86151	0.999997	797	4	-0.079018	0.80859	0.94434	0.999997	1548	2	-0.079018
NAA60	15	0.62431	0.86191	0.999997	798	3	0.28545	0.085665	0.28907	0.694809	379	8	0.28545
NonTargeting_Human_0861	1	0.62436	0.62524	0.999997	799	0	0.17426	0.37564	0.3757	0.742957	1030	0	0.17426
NonTargeting_Human_0546	1	0.62453	0.62538	0.999997	800	0	0.18538	0.37547	0.37556	0.742957	1029	0	0.18538
NonTargeting_Human_0145	1	0.62838	0.62939	0.999997	801	0	0.29533	0.37162	0.37157	0.738927	1027	0	0.29533
ZG16B	15	0.62906	0.86393	0.999997	802	3	0.27705	0.24356	0.55711	0.835672	764	7	0.27705
NonTargeting_Human_0894	1	0.62945	0.63055	0.999997	803	0	0.24153	0.37055	0.37045	0.738102	1025	0	0.24153
NonTargeting_Human_0699	1	0.62953	0.63064	0.999997	804	0	0.22683	0.37047	0.37038	0.738102	1024	0	0.22683
NonTargeting_Human_0560	1	0.62969	0.6308	0.999997	805	0	0.41358	0.37031	0.3702	0.738102	1023	0	0.41358
NonTargeting_Human_0745	1	0.63002	0.63117	0.999997	806	0	0.20517	0.36998	0.36996	0.738102	1022	0	0.20517
NonTargeting_Human_0753	1	0.63035	0.6316	0.999997	807	0	0.25693	0.36965	0.36966	0.738102	1018	0	0.25693
NonTargeting_Human_0684	1	0.6306	0.63185	0.999997	808	0	0.19964	0.3694	0.36943	0.738102	1017	0	0.19964
VPS13C	15	0.63083	0.86473	0.999997	809	4	0.083821	0.24926	0.56496	0.842389	774	5	0.083821
NonTargeting_Human_0358	1	0.63117	0.63242	0.999997	810	0	0.18627	0.36883	0.36886	0.738102	1015	0	0.18627
NonTargeting_Human_0793	1	0.63462	0.6358	0.999997	811	0	0.27285	0.36538	0.36527	0.73557	1012	1	0.27285
HDAC3	15	0.635	0.86663	0.999997	812	4	0.20823	0.36246	0.6848	0.920773	1009	5	0.20823
NonTargeting_Human_0629	1	0.63872	0.63993	0.999997	813	0	0.18763	0.36128	0.36111	0.730552	1008	1	0.18763
NonTargeting_Human_0775	1	0.63896	0.6402	0.999997	814	0	0.24044	0.36104	0.36091	0.730552	1007	1	0.24044
NonTargeting_Human_0739	1	0.64003	0.64135	0.999997	815	0	0.34355	0.35997	0.35989	0.72978	1006	1	0.34355
NonTargeting_Human_0248	1	0.64011	0.64145	0.999997	816	0	0.22871	0.35989	0.35985	0.72978	1005	1	0.22871
NonTargeting_Human_0027	1	0.64126	0.64257	0.999997	817	0	0.2224	0.35874	0.35873	0.729118	1002	1	0.2224
NonTargeting_Human_0240	1	0.64224	0.64354	0.999997	818	0	0.17879	0.35776	0.35771	0.727884	1000	1	0.17879
NonTargeting_Human_0132	1	0.6429	0.64417	0.999997	819	0	0.31511	0.3571	0.35717	0.727625	999	1	0.31511
NonTargeting_Human_0972	1	0.64306	0.64434	0.999997	820	0	0.31598	0.35694	0.35699	0.727625	998	1	0.31598
RALGAPA2	15	0.64312	0.87019	0.999997	821	1	0.54166	0.00015223	0.0014382	0.066311	37	12	0.54166
NonTargeting_Human_0537	1	0.64421	0.64555	0.999997	822	0	0.25496	0.35579	0.35596	0.727625	996	1	0.25496
NonTargeting_Human_0470	1	0.64503	0.6465	0.999997	823	0	0.2164	0.35497	0.35507	0.727572	995	1	0.2164
NonTargeting_Human_0707	1	0.64519	0.64663	0.999997	824	0	0.24868	0.35481	0.35493	0.727572	994	1	0.24868
NonTargeting_Human_0185	1	0.64528	0.64669	0.999997	825	0	0.22375	0.35472	0.35486	0.727572	993	1	0.22375
ATP6V1B1	15	0.646	0.87132	0.999997	826	4	0.095531	0.1984	0.49499	0.801541	666	4	0.095531
NonTargeting_Human_0910	1	0.64601	0.64747	0.999997	827	0	0.218	0.35399	0.35414	0.727572	992	1	0.218
NonTargeting_Human_0196	1	0.6461	0.64753	0.999997	828	0	0.22035	0.3539	0.35403	0.727572	991	1	0.22035
NonTargeting_Human_0088	1	0.64618	0.64764	0.999997	829	0	0.22449	0.35382	0.35395	0.727572	990	1	0.22449
NonTargeting_Human_0993	1	0.64683	0.64832	0.999997	830	0	0.25856	0.35317	0.35328	0.727572	988	1	0.25856
NonTargeting_Human_0601	1	0.64823	0.64979	0.999997	831	0	0.29443	0.35177	0.35191	0.727572	987	1	0.29443
SVOP	15	0.64826	0.87228	0.999997	832	1	0.29194	0.16101	0.43948	0.776185	574	7	0.29194
KAT7	15	0.64851	0.87239	0.999997	833	4	-0.0050954	0.20144	0.49922	0.801541	672	5	-0.0050954
NonTargeting_Human_0455	1	0.64913	0.65069	0.999997	834	0	0.34817	0.35087	0.35101	0.727572	986	1	0.34817
NonTargeting_Human_0306	1	0.64954	0.65107	0.999997	835	0	0.22912	0.35046	0.35054	0.727572	985	1	0.22912
COA4	15	0.64982	0.87291	0.999997	836	4	0.048255	0.43266	0.74613	0.950563	1120	6	0.048255
NonTargeting_Human_0799	1	0.65085	0.65232	0.999997	837	0	0.40899	0.34915	0.34917	0.726541	984	1	0.40899
TBX6	15	0.65117	0.87347	0.999997	838	3	-0.019172	0.86711	0.96497	0.999997	1586	3	-0.019172
ZNF232	15	0.65165	0.8737	0.999997	839	4	0.46018	0.054346	0.21237	0.6507	277	8	0.46018
NonTargeting_Human_0786	1	0.65208	0.65352	0.999997	840	0	0.3542	0.34792	0.34802	0.726541	983	1	0.3542
NonTargeting_Human_0383	1	0.65233	0.65375	0.999997	841	0	0.22086	0.34767	0.34775	0.726541	982	1	0.22086
GIGYF2	15	0.6527	0.87419	0.999997	842	4	0.17752	0.67958	0.89663	0.999997	1428	5	0.17752
NonTargeting_Human_0437	1	0.6534	0.65472	0.999997	843	0	0.24485	0.3466	0.34672	0.725759	981	1	0.24485
SEZ6L2	15	0.65374	0.87458	0.999997	844	4	-0.14195	0.67767	0.89571	0.999997	1424	2	-0.14195
NonTargeting_Human_0854	1	0.65454	0.65596	0.999997	845	0	0.33483	0.34546	0.34569	0.72446	980	1	0.33483
NonTargeting_Human_0518	1	0.65569	0.6572	0.999997	846	0	0.26821	0.34431	0.34466	0.723158	979	1	0.26821
NonTargeting_Human_0497	1	0.65717	0.65858	0.999997	847	0	0.24251	0.34283	0.3431	0.721625	978	1	0.24251
NonTargeting_Human_0715	1	0.65733	0.65878	0.999997	848	0	0.25484	0.34267	0.34289	0.721625	977	1	0.25484
NonTargeting_Human_0160	1	0.65864	0.65989	0.999997	849	0	0.26125	0.34136	0.34144	0.719859	975	1	0.26125
NonTargeting_Human_0547	1	0.66102	0.66196	0.999997	850	0	0.38361	0.33898	0.33893	0.717158	973	1	0.38361
NonTargeting_Human_0148	1	0.66151	0.66253	0.999997	851	0	0.22186	0.33849	0.33845	0.717008	971	1	0.22186
NonTargeting_Human_0765	1	0.66168	0.66272	0.999997	852	0	0.23248	0.33832	0.33825	0.717008	970	1	0.23248
NonTargeting_Human_0433	1	0.66209	0.66318	0.999997	853	0	0.26574	0.33791	0.33786	0.717008	969	1	0.26574
NonTargeting_Human_0403	1	0.66307	0.66414	0.999997	854	0	0.33185	0.33693	0.33682	0.716722	967	1	0.33185
NonTargeting_Human_0493	1	0.6634	0.66449	0.999997	855	0	0.39411	0.3366	0.33643	0.716722	966	1	0.39411
NonTargeting_Human_0440	1	0.66373	0.66479	0.999997	856	0	0.33705	0.33627	0.33603	0.716722	965	1	0.33705
NonTargeting_Human_0111	1	0.66389	0.66495	0.999997	857	0	0.22419	0.33611	0.33583	0.716722	964	1	0.22419
NonTargeting_Human_0153	1	0.66397	0.66505	0.999997	858	0	0.21903	0.33603	0.33577	0.716722	963	1	0.21903
NonTargeting_Human_0880	1	0.66406	0.66513	0.999997	859	0	0.31347	0.33594	0.33568	0.716722	962	1	0.31347
KCNK12	15	0.66415	0.87887	0.999997	860	2	0.22943	0.12743	0.37976	0.745063	489	8	0.22943
NonTargeting_Human_0940	1	0.6652	0.6662	0.999997	861	0	0.42305	0.3348	0.33451	0.716722	961	1	0.42305
NonTargeting_Human_0642	1	0.66529	0.66629	0.999997	862	0	0.3051	0.33471	0.3344	0.716722	960	1	0.3051
NonTargeting_Human_0821	1	0.66545	0.66646	0.999997	863	0	0.33454	0.33455	0.3342	0.716722	959	1	0.33454
NonTargeting_Human_0287	1	0.66561	0.66662	0.999997	864	0	0.30693	0.33439	0.33404	0.716722	958	1	0.30693
NonTargeting_Human_0815	1	0.66594	0.66692	0.999997	865	0	0.43459	0.33406	0.33366	0.716722	957	1	0.43459
NonTargeting_Human_0585	1	0.66619	0.66719	0.999997	866	0	0.23605	0.33381	0.33341	0.716722	956	1	0.23605
NonTargeting_Human_0933	1	0.66627	0.66731	0.999997	867	0	0.23322	0.33373	0.33333	0.716722	955	1	0.23322
NonTargeting_Human_0112	1	0.66742	0.66853	0.999997	868	0	0.36351	0.33258	0.33208	0.716722	954	1	0.36351
NonTargeting_Human_0944	1	0.66865	0.66975	0.999997	869	0	0.23618	0.33135	0.33089	0.716722	953	1	0.23618
NCAPG2	15	0.66889	0.88105	0.999997	870	3	0.10014	0.43259	0.74606	0.950563	1119	5	0.10014
NonTargeting_Human_0354	1	0.66898	0.6701	0.999997	871	0	0.25679	0.33102	0.33055	0.716722	952	1	0.25679
XAGE1A	15	0.66901	0.8811	0.999997	872	3	0.2436	0.21725	0.52117	0.815991	713	7	0.2436
NonTargeting_Human_0211	1	0.66906	0.67019	0.999997	873	0	0.20647	0.33094	0.33045	0.716722	951	1	0.20647
NonTargeting_Human_0598	1	0.67021	0.67121	0.999997	874	0	0.33626	0.32979	0.32939	0.716722	949	1	0.33626
NonTargeting_Human_0475	1	0.67029	0.67128	0.999997	875	0	0.34946	0.32971	0.32927	0.716722	948	1	0.34946
NonTargeting_Human_0176	1	0.67127	0.67222	0.999997	876	0	0.22805	0.32873	0.32826	0.716194	946	1	0.22805
NonTargeting_Human_0638	1	0.67152	0.67241	0.999997	877	0	0.31289	0.32848	0.32802	0.716194	945	1	0.31289
KBTBD12	15	0.67206	0.88234	0.999997	878	4	0.2449	0.061006	0.23081	0.662205	304	7	0.2449
NIPSNAP1	15	0.67272	0.88261	0.999997	879	4	-0.025808	0.25078	0.56695	0.843202	777	4	-0.025808
KRTAP4-2	15	0.67373	0.88301	0.999997	880	4	0.15045	0.15699	0.43321	0.773685	560	6	0.15045
NonTargeting_Human_0242	1	0.67423	0.6749	0.999997	881	0	0.23283	0.32577	0.32531	0.71153	943	1	0.23283
NonTargeting_Human_0278	1	0.67513	0.6758	0.999997	882	0	0.27704	0.32487	0.32442	0.710489	942	1	0.27704
TBC1D25	15	0.67524	0.88361	0.999997	883	4	-0.10567	0.7224	0.91418	0.999997	1479	3	-0.10567
NonTargeting_Human_0477	1	0.67529	0.67598	0.999997	884	0	0.32409	0.32471	0.32425	0.710489	941	1	0.32409
NonTargeting_Human_0249	1	0.67587	0.67642	0.999997	885	0	0.28605	0.32413	0.32374	0.710489	940	1	0.28605
NonTargeting_Human_0221	1	0.6771	0.67764	0.999997	886	0	0.51523	0.3229	0.32246	0.709743	936	1	0.51523
ARHGEF35	15	0.67724	0.8845	0.999997	887	3	-0.027583	0.43123	0.74495	0.950563	1116	5	-0.027583
NonTargeting_Human_0082	1	0.67751	0.67808	0.999997	888	0	0.28549	0.32249	0.32208	0.709743	935	1	0.28549
SYP	14	0.67761	0.87714	0.999997	889	4	0.026713	0.46048	0.76028	0.960514	1170	5	0.026713
NonTargeting_Human_0780	1	0.67783	0.67842	0.999997	890	0	0.38591	0.32217	0.32172	0.709743	934	1	0.38591
NonTargeting_Human_0292	1	0.67841	0.679	0.999997	891	0	0.35687	0.32159	0.32117	0.709569	933	1	0.35687
NonTargeting_Human_0708	1	0.67906	0.67959	0.999997	892	0	0.39355	0.32094	0.32054	0.709569	932	1	0.39355
NonTargeting_Human_0566	1	0.67931	0.6798	0.999997	893	0	0.28957	0.32069	0.32032	0.709569	930	1	0.28957
NonTargeting_Human_0797	1	0.67939	0.67988	0.999997	894	0	0.35376	0.32061	0.32023	0.709569	929	1	0.35376
MAOB	15	0.67966	0.88547	0.999997	895	3	0.19201	0.29089	0.6186	0.873099	871	7	0.19201
NonTargeting_Human_0323	1	0.6812	0.68185	0.999997	896	0	0.39774	0.3188	0.31826	0.7076	928	1	0.39774
NonTargeting_Human_0555	1	0.68144	0.68208	0.999997	897	0	0.26478	0.31856	0.31797	0.7076	927	1	0.26478
NOTCH2NL	15	0.68224	0.88653	0.999997	898	4	0.14615	0.18484	0.47555	0.788562	637	7	0.14615
NonTargeting_Human_0061	1	0.68243	0.68306	0.999997	899	0	0.29939	0.31757	0.3169	0.706365	925	1	0.29939
NonTargeting_Human_0957	1	0.68251	0.68311	0.999997	900	0	0.5047	0.31749	0.31678	0.706365	924	1	0.5047
NonTargeting_Human_0291	1	0.68284	0.68345	0.999997	901	0	0.30795	0.31716	0.31651	0.706365	923	1	0.30795
NonTargeting_Human_0375	1	0.68333	0.68395	0.999997	902	0	0.26142	0.31667	0.31606	0.706365	922	1	0.26142
NonTargeting_Human_0311	1	0.68349	0.68413	0.999997	903	0	0.29373	0.31651	0.31587	0.706365	921	1	0.29373
NonTargeting_Human_0450	1	0.68366	0.68434	0.999997	904	0	0.23507	0.31634	0.31576	0.706365	920	1	0.23507
NonTargeting_Human_0822	1	0.68382	0.68456	0.999997	905	0	0.3694	0.31618	0.31561	0.706365	919	1	0.3694
NonTargeting_Human_0864	1	0.68448	0.68523	0.999997	906	0	0.27389	0.31552	0.31495	0.706365	918	1	0.27389
NonTargeting_Human_0871	1	0.68538	0.68614	0.999997	907	0	0.24034	0.31462	0.31404	0.706365	917	1	0.24034
NonTargeting_Human_0832	1	0.68644	0.68716	0.999997	908	0	0.25644	0.31356	0.31307	0.706365	916	1	0.25644
TMOD2	15	0.68653	0.88835	0.999997	909	4	0.044167	0.41861	0.7341	0.94639	1095	5	0.044167
NonTargeting_Human_0819	1	0.68661	0.68728	0.999997	910	0	0.24352	0.31339	0.3129	0.706365	915	1	0.24352
NonTargeting_Human_0971	1	0.68669	0.68735	0.999997	911	0	0.37594	0.31331	0.31283	0.706365	914	1	0.37594
NonTargeting_Human_0700	1	0.68743	0.68799	0.999997	912	0	0.36248	0.31257	0.31209	0.706365	913	1	0.36248
NonTargeting_Human_0942	1	0.68792	0.68846	0.999997	913	0	0.24381	0.31208	0.31162	0.706365	912	1	0.24381
NonTargeting_Human_0342	1	0.68956	0.6902	0.999997	914	0	0.31726	0.31044	0.3099	0.706041	910	1	0.31726
NonTargeting_Human_0459	1	0.69038	0.69106	0.999997	915	0	0.35703	0.30962	0.30905	0.705014	909	1	0.35703
NonTargeting_Human_0303	1	0.69087	0.69156	0.999997	916	0	0.25572	0.30913	0.30852	0.704732	907	1	0.25572
NonTargeting_Human_0364	1	0.69112	0.69175	0.999997	917	0	0.37791	0.30888	0.30826	0.704732	906	1	0.37791
NonTargeting_Human_0048	1	0.69202	0.69272	0.999997	918	0	0.38389	0.30798	0.30746	0.704193	905	1	0.38389
NonTargeting_Human_0105	1	0.69235	0.69302	0.999997	919	0	0.33243	0.30765	0.30718	0.704193	904	1	0.33243
NonTargeting_Human_0451	1	0.69284	0.69342	0.999997	920	0	0.34362	0.30716	0.3067	0.704193	903	1	0.34362
ANAPC16	15	0.69313	0.89124	0.999997	921	1	0.47835	0.011606	0.063755	0.477148	119	8	0.47835
NonTargeting_Human_0267	1	0.69473	0.69507	0.999997	922	0	0.28962	0.30527	0.30498	0.702144	902	1	0.28962
NonTargeting_Human_0110	1	0.69522	0.69562	0.999997	923	0	0.37562	0.30478	0.30448	0.702144	901	1	0.37562
NonTargeting_Human_0056	1	0.6953	0.69571	0.999997	924	0	0.25183	0.3047	0.30441	0.702144	900	1	0.25183
NonTargeting_Human_0581	1	0.69563	0.69606	0.999997	925	0	0.2692	0.30437	0.3041	0.702144	899	1	0.2692
NonTargeting_Human_0393	1	0.69571	0.69611	0.999997	926	0	0.28509	0.30429	0.30402	0.702144	898	1	0.28509
NonTargeting_Human_0729	1	0.69645	0.69687	0.999997	927	0	0.3535	0.30355	0.30329	0.702144	897	1	0.3535
NonTargeting_Human_0006	1	0.69694	0.69734	0.999997	928	0	0.35179	0.30306	0.30285	0.702144	896	1	0.35179
DDX52	15	0.69719	0.89299	0.999997	929	2	0.051451	0.22846	0.53683	0.823573	735	7	0.051451
NonTargeting_Human_0495	1	0.69842	0.69883	0.999997	930	0	0.31992	0.30158	0.30155	0.702144	895	1	0.31992
NonTargeting_Human_0268	1	0.69932	0.69972	0.999997	931	0	0.54861	0.30068	0.30065	0.702144	894	1	0.54861
NonTargeting_Human_0039	1	0.69989	0.70031	0.999997	932	0	0.31446	0.30011	0.29997	0.702144	893	1	0.31446
NonTargeting_Human_0697	1	0.70022	0.70067	0.999997	933	0	0.27807	0.29978	0.29966	0.702144	892	1	0.27807
NonTargeting_Human_0900	1	0.7003	0.70075	0.999997	934	0	0.36729	0.2997	0.2996	0.702144	891	1	0.36729
NonTargeting_Human_0624	1	0.70039	0.70084	0.999997	935	0	0.56077	0.29961	0.29953	0.702144	890	1	0.56077
NonTargeting_Human_0391	1	0.70104	0.7015	0.999997	936	0	0.34024	0.29896	0.29889	0.702144	889	1	0.34024
SLC38A5	15	0.70225	0.89523	0.999997	937	4	-0.0019172	0.27941	0.60442	0.863165	842	5	-0.0019172
NonTargeting_Human_0612	1	0.70432	0.70479	0.999997	938	0	0.3958	0.29568	0.29571	0.699169	883	1	0.3958
NonTargeting_Human_0217	1	0.70457	0.705	0.999997	939	0	0.35958	0.29543	0.29535	0.699169	882	1	0.35958
NonTargeting_Human_0019	1	0.70531	0.70567	0.999997	940	0	0.26862	0.29469	0.29456	0.698328	879	1	0.26862
ITGA1	15	0.70611	0.89678	0.999997	941	4	0.048867	0.74385	0.92136	0.999997	1496	3	0.048867
POLRMT	15	0.70678	0.897	0.999997	942	4	0.24594	0.034467	0.15014	0.60978	212	7	0.24594
NonTargeting_Human_0507	1	0.70744	0.70761	0.999997	943	0	0.34834	0.29256	0.29228	0.694809	877	1	0.34834
NonTargeting_Human_0283	1	0.7076	0.70777	0.999997	944	0	0.27712	0.2924	0.29209	0.694809	876	1	0.27712
NonTargeting_Human_0452	1	0.70793	0.70802	0.999997	945	0	0.43179	0.29207	0.29174	0.694809	875	1	0.43179
NonTargeting_Human_0833	1	0.70818	0.70827	0.999997	946	0	0.33325	0.29182	0.29149	0.694809	874	1	0.33325
NonTargeting_Human_0178	1	0.70826	0.70835	0.999997	947	0	0.29415	0.29174	0.2914	0.694809	873	1	0.29415
NonTargeting_Human_0246	1	0.70891	0.70901	0.999997	948	0	0.43983	0.29109	0.29071	0.694809	872	1	0.43983
NSUN3	15	0.70907	0.89816	0.999997	949	2	0.20349	0.082809	0.28234	0.694809	365	5	0.20349
NonTargeting_Human_0616	1	0.70957	0.70975	0.999997	950	0	0.52955	0.29043	0.29011	0.694809	870	1	0.52955
NonTargeting_Human_0405	1	0.70965	0.70982	0.999997	951	0	0.31012	0.29035	0.29	0.694809	869	1	0.31012
NonTargeting_Human_0281	1	0.70998	0.7101	0.999997	952	0	0.3211	0.29002	0.28969	0.694809	868	1	0.3211
KLHL20	15	0.7105	0.8988	0.999997	953	4	-0.04551	0.26317	0.58343	0.852558	809	5	-0.04551
NonTargeting_Human_0494	1	0.71055	0.71065	0.999997	954	0	0.37652	0.28945	0.28918	0.694809	867	1	0.37652
ATP5O	15	0.71056	0.89882	0.999997	955	4	-0.097337	0.43292	0.74632	0.950563	1121	4	-0.097337
NonTargeting_Human_0304	1	0.71064	0.71073	0.999997	956	0	0.35163	0.28936	0.28912	0.694809	866	1	0.35163
NonTargeting_Human_0908	1	0.71072	0.71081	0.999997	957	0	0.43989	0.28928	0.28903	0.694809	865	1	0.43989
NonTargeting_Human_0151	1	0.7108	0.71092	0.999997	958	0	0.2925	0.2892	0.28894	0.694809	864	1	0.2925
NonTargeting_Human_0559	1	0.71211	0.71228	0.999997	959	0	0.39688	0.28789	0.28758	0.694809	862	1	0.39688
GPR152	15	0.71216	0.89953	0.999997	960	3	0.13421	0.36541	0.68747	0.921428	1013	6	0.13421
DNAL4	15	0.71221	0.89956	0.999997	961	4	-0.14756	0.93023	0.98068	0.999997	1620	2	-0.14756
ACO2	15	0.71282	0.89982	0.999997	962	4	-0.12198	0.74798	0.92289	0.999997	1502	4	-0.12198
NonTargeting_Human_0747	1	0.71342	0.71373	0.999997	963	0	0.38613	0.28658	0.28623	0.694809	861	1	0.38613
NonTargeting_Human_0503	1	0.71367	0.71397	0.999997	964	0	0.40877	0.28633	0.28598	0.694809	859	1	0.40877
NonTargeting_Human_0184	1	0.71375	0.71403	0.999997	965	0	0.47545	0.28625	0.28587	0.694809	858	1	0.47545
MRPL33	15	0.71398	0.90026	0.999997	966	3	0.44329	0.012707	0.068784	0.485927	124	10	0.44329
NonTargeting_Human_0399	1	0.71424	0.71451	0.999997	967	0	0.31629	0.28576	0.28535	0.694809	857	1	0.31629
NonTargeting_Human_0673	1	0.71465	0.7149	0.999997	968	0	0.3385	0.28535	0.28496	0.694809	856	1	0.3385
NonTargeting_Human_0764	1	0.71564	0.71593	0.999997	969	0	0.24507	0.28436	0.28394	0.694809	854	1	0.24507
NonTargeting_Human_0254	1	0.71597	0.7163	0.999997	970	0	0.4321	0.28403	0.28362	0.694809	853	1	0.4321
NonTargeting_Human_0415	1	0.71613	0.7165	0.999997	971	0	0.3787	0.28387	0.28346	0.694809	852	1	0.3787
NonTargeting_Human_0166	1	0.71646	0.71681	0.999997	972	0	0.4568	0.28354	0.2831	0.694809	851	1	0.4568
NonTargeting_Human_0890	1	0.71736	0.71772	0.999997	973	0	0.28337	0.28264	0.28224	0.694809	849	1	0.28337
NonTargeting_Human_0467	1	0.71917	0.71945	0.999997	974	0	0.54377	0.28083	0.2805	0.694111	847	1	0.54377
NonTargeting_Human_0504	1	0.71958	0.71987	0.999997	975	0	0.43152	0.28042	0.2801	0.694111	846	1	0.43152
NonTargeting_Human_0255	1	0.7204	0.72061	0.999997	976	0	0.37808	0.2796	0.27935	0.694111	844	1	0.37808
NonTargeting_Human_0288	1	0.72056	0.72079	0.999997	977	0	0.29675	0.27944	0.27917	0.694111	843	1	0.29675
THOC6	15	0.72141	0.90339	0.999997	978	4	-0.0069852	0.056963	0.22054	0.652688	296	6	-0.0069852
NonTargeting_Human_0332	1	0.72146	0.7217	0.999997	979	0	0.34986	0.27854	0.27837	0.694111	841	1	0.34986
NonTargeting_Human_0878	1	0.72212	0.72254	0.999997	980	0	0.47177	0.27788	0.27767	0.694111	840	1	0.47177
SDHAF1	15	0.72265	0.90394	0.999997	981	4	0.095704	0.32356	0.64966	0.895892	938	6	0.095704
NonTargeting_Human_0637	1	0.72318	0.72368	0.999997	982	0	0.3193	0.27682	0.27668	0.693473	839	1	0.3193
NonTargeting_Human_0032	1	0.72335	0.72386	0.999997	983	0	0.37254	0.27665	0.27654	0.693473	838	1	0.37254
NonTargeting_Human_0663	1	0.72376	0.72419	0.999997	984	0	0.59623	0.27624	0.2761	0.693473	837	1	0.59623
CAPN15	15	0.72395	0.90446	0.999997	985	3	0.018516	0.14621	0.4159	0.765737	538	6	0.018516
NonTargeting_Human_0801	1	0.72433	0.72475	0.999997	986	0	0.44023	0.27567	0.2756	0.693473	836	1	0.44023
NonTargeting_Human_0965	1	0.72441	0.72482	0.999997	987	0	0.48297	0.27559	0.27553	0.693473	835	1	0.48297
SLX4	15	0.72449	0.90473	0.999997	988	4	0.047674	0.32786	0.65356	0.897413	944	6	0.047674
NonTargeting_Human_0820	1	0.72548	0.72597	0.999997	989	0	0.31009	0.27452	0.27439	0.693233	833	1	0.31009
NonTargeting_Human_0632	1	0.72581	0.72627	0.999997	990	0	0.37098	0.27419	0.27404	0.693233	832	1	0.37098
NonTargeting_Human_0490	1	0.72622	0.7267	0.999997	991	0	0.36117	0.27378	0.27354	0.693233	831	1	0.36117
NSFL1C	15	0.72634	0.90556	0.999997	992	3	0.20467	0.1127	0.34887	0.726541	443	7	0.20467
NonTargeting_Human_0963	1	0.72737	0.72781	0.999997	993	0	0.61957	0.27263	0.27254	0.692015	829	1	0.61957
NonTargeting_Human_0427	1	0.72786	0.72833	0.999997	994	0	0.35152	0.27214	0.27212	0.692015	828	1	0.35152
NonTargeting_Human_0084	1	0.72794	0.72838	0.999997	995	0	0.36887	0.27206	0.27204	0.692015	826	1	0.36887
NonTargeting_Human_0914	1	0.72909	0.72947	0.999997	996	0	0.37964	0.27091	0.27086	0.691749	824	1	0.37964
CBWD1	15	0.73	0.90712	0.999997	997	3	0.12396	0.33784	0.66262	0.905543	968	6	0.12396
NonTargeting_Human_0147	1	0.73065	0.73098	0.999997	998	0	0.55176	0.26935	0.26933	0.689863	823	1	0.55176
NonTargeting_Human_0551	1	0.73163	0.73196	0.999997	999	0	0.28523	0.26837	0.26832	0.688293	821	1	0.28523
ZNF143	15	0.73173	0.90779	0.999997	1000	2	-0.034882	0.16695	0.44908	0.778761	594	6	-0.034882
DNASE2	15	0.73174	0.90779	0.999997	1001	4	0.0071717	0.64422	0.87833	0.999997	1393	5	0.0071717
NonTargeting_Human_0859	1	0.73196	0.73234	0.999997	1002	0	0.40135	0.26804	0.26806	0.688293	820	1	0.40135
NonTargeting_Human_0695	1	0.7322	0.73253	0.999997	1003	0	0.41972	0.2678	0.26781	0.688293	819	1	0.41972
NonTargeting_Human_0430	1	0.73294	0.73318	0.999997	1004	0	0.6306	0.26706	0.26706	0.688068	817	1	0.6306
NonTargeting_Human_0429	1	0.73425	0.73448	0.999997	1005	0	0.30343	0.26575	0.26585	0.685961	815	1	0.30343
NonTargeting_Human_0357	1	0.7345	0.73474	0.999997	1006	0	0.29729	0.2655	0.26557	0.685961	814	1	0.29729
IGF1R	15	0.73476	0.90911	0.999997	1007	2	0.27402	0.092459	0.30459	0.702144	400	8	0.27402
NonTargeting_Human_0478	1	0.73491	0.73524	0.999997	1008	0	0.32966	0.26509	0.26515	0.685961	813	1	0.32966
NonTargeting_Human_0615	1	0.73663	0.73695	0.999997	1009	0	0.37472	0.26337	0.26333	0.683498	810	1	0.37472
NonTargeting_Human_0237	1	0.73712	0.73748	0.999997	1010	0	0.69424	0.26288	0.26282	0.683176	808	1	0.69424
NonTargeting_Human_0165	1	0.73729	0.73767	0.999997	1011	0	0.34267	0.26271	0.26261	0.683176	807	1	0.34267
NonTargeting_Human_0621	1	0.73745	0.73788	0.999997	1012	0	0.56046	0.26255	0.2624	0.683176	806	1	0.56046
NonTargeting_Human_0385	1	0.73786	0.73827	0.999997	1013	0	0.41175	0.26214	0.26195	0.683176	805	1	0.41175
COMMD10	15	0.73822	0.91063	0.999997	1014	4	0.078396	0.43561	0.74873	0.950563	1128	6	0.078396
NonTargeting_Human_0361	1	0.73835	0.7388	0.999997	1015	0	0.34858	0.26165	0.26144	0.683176	803	1	0.34858
TMEM221	15	0.73844	0.91074	0.999997	1016	4	0.16641	0.68102	0.89729	0.999997	1429	5	0.16641
NonTargeting_Human_0776	1	0.73852	0.73895	0.999997	1017	0	0.32096	0.26148	0.26132	0.683176	802	1	0.32096
NonTargeting_Human_0200	1	0.74049	0.74085	0.999997	1018	0	0.34954	0.25951	0.25946	0.680508	801	1	0.34954
NonTargeting_Human_0874	1	0.74082	0.74128	0.999997	1019	0	0.40477	0.25918	0.25918	0.680508	800	1	0.40477
NonTargeting_Human_0222	1	0.74123	0.74166	0.999997	1020	0	0.59579	0.25877	0.25877	0.680508	799	1	0.59579
NonTargeting_Human_0086	1	0.74131	0.74172	0.999997	1021	0	0.28441	0.25869	0.25875	0.680508	798	1	0.28441
NonTargeting_Human_0644	1	0.74139	0.74185	0.999997	1022	0	0.40305	0.25861	0.25869	0.680508	797	1	0.40305
PHF3	15	0.74291	0.91258	0.999997	1023	4	0.33892	0.032631	0.14408	0.605326	208	7	0.33892
NonTargeting_Human_0333	1	0.74295	0.74345	0.999997	1024	0	0.39307	0.25705	0.2569	0.67886	795	1	0.39307
NonTargeting_Human_0272	1	0.74303	0.7435	0.999997	1025	0	0.42228	0.25697	0.25681	0.67886	794	1	0.42228
TBPL2	15	0.74309	0.9127	0.999997	1026	2	0.49241	0.0040344	0.026422	0.355501	88	11	0.49241
NonTargeting_Human_0285	1	0.74319	0.74367	0.999997	1027	0	0.83929	0.25681	0.25664	0.67886	793	1	0.83929
NonTargeting_Human_0225	1	0.74369	0.7441	0.999997	1028	0	0.42835	0.25631	0.2561	0.67886	791	1	0.42835
PPIAL4A	15	0.74408	0.91315	0.999997	1029	4	0.091857	0.0091862	0.052367	0.443225	113	5	0.091857
NonTargeting_Human_0413	1	0.74426	0.74465	0.999997	1030	0	0.56547	0.25574	0.25558	0.67886	790	1	0.56547
NonTargeting_Human_0275	1	0.74492	0.74536	0.999997	1031	0	0.51884	0.25508	0.25497	0.67886	789	1	0.51884
NonTargeting_Human_0553	1	0.74508	0.74552	0.999997	1032	0	0.38584	0.25492	0.25482	0.67886	788	1	0.38584
COG2	15	0.74525	0.9137	0.999997	1033	4	-0.17638	0.84842	0.95908	0.999997	1574	4	-0.17638
S100A10	15	0.74547	0.91382	0.999997	1034	4	-0.038271	0.44792	0.75839	0.959349	1141	4	-0.038271
NonTargeting_Human_0869	1	0.74582	0.7463	0.999997	1035	0	0.52632	0.25418	0.25404	0.67886	786	1	0.52632
NonTargeting_Human_0720	1	0.74606	0.74652	0.999997	1036	0	0.47442	0.25394	0.25378	0.67886	785	1	0.47442
GLOD5	15	0.74662	0.91438	0.999997	1037	4	-0.012764	0.48854	0.79155	0.985634	1205	5	-0.012764
NonTargeting_Human_0276	1	0.74672	0.74714	0.999997	1038	0	0.39622	0.25328	0.25314	0.67886	783	1	0.39622
NonTargeting_Human_0563	1	0.7468	0.74724	0.999997	1039	0	0.43278	0.2532	0.25305	0.67886	782	1	0.43278
NonTargeting_Human_0576	1	0.74705	0.74752	0.999997	1040	0	0.99649	0.25295	0.25282	0.67886	781	1	0.99649
NonTargeting_Human_0647	1	0.74779	0.74821	0.999997	1041	0	0.50777	0.25221	0.25212	0.67886	780	1	0.50777
MLLT11	15	0.74786	0.91487	0.999997	1042	4	-0.0023891	0.66725	0.89023	0.999997	1415	4	-0.0023891
NonTargeting_Human_0282	1	0.74787	0.74826	0.999997	1043	0	0.40086	0.25213	0.25204	0.67886	779	1	0.40086
NonTargeting_Human_0772	1	0.74795	0.7483	0.999997	1044	0	0.54281	0.25205	0.25192	0.67886	778	1	0.54281
NDUFB10	15	0.74829	0.91505	0.999997	1045	4	-0.10907	0.093711	0.30748	0.704193	405	6	-0.10907
NonTargeting_Human_0224	1	0.75025	0.75051	0.999997	1046	0	0.51427	0.24975	0.24962	0.677904	776	1	0.51427
NonTargeting_Human_0215	1	0.75066	0.7509	0.999997	1047	0	0.47344	0.24934	0.24925	0.677904	775	1	0.47344
NonTargeting_Human_0093	1	0.75082	0.75104	0.999997	1048	0	0.38403	0.24918	0.24905	0.677904	773	1	0.38403
NonTargeting_Human_0386	1	0.75123	0.75146	0.999997	1049	0	0.6101	0.24877	0.24871	0.677904	772	1	0.6101
NonTargeting_Human_0839	1	0.75139	0.75165	0.999997	1050	0	0.49383	0.24861	0.24858	0.677904	771	1	0.49383
NonTargeting_Human_0181	1	0.75271	0.75303	0.999997	1051	0	0.4033	0.24729	0.24739	0.677904	769	1	0.4033
NonTargeting_Human_0978	1	0.75303	0.75335	0.999997	1052	0	0.77034	0.24697	0.24697	0.677904	768	1	0.77034
NonTargeting_Human_0273	1	0.75369	0.75401	0.999997	1053	0	0.41502	0.24631	0.24623	0.677239	767	1	0.41502
BATF	15	0.7537	0.9176	0.999997	1054	2	0.23963	0.0966	0.31391	0.706365	411	8	0.23963
hsa-mir-550a-1	9	0.754	0.87054	0.999997	1055	1	0.67258	0.0055661	0.028457	0.355501	96	6	0.67258
NonTargeting_Human_0737	1	0.75508	0.75546	0.999997	1056	0	0.62647	0.24492	0.245	0.675973	765	1	0.62647
NonTargeting_Human_0337	1	0.75681	0.75724	0.999997	1057	0	0.30798	0.24319	0.2431	0.674011	763	1	0.30798
AGAP4	15	0.75733	0.91919	0.999997	1058	2	0.24179	0.17203	0.45643	0.778761	608	6	0.24179
NonTargeting_Human_0666	1	0.75746	0.75793	0.999997	1059	0	0.52311	0.24254	0.24243	0.674011	762	1	0.52311
NonTargeting_Human_0023	1	0.75771	0.75811	0.999997	1060	0	0.37164	0.24229	0.24221	0.674011	761	1	0.37164
NonTargeting_Human_0523	1	0.75845	0.7588	0.999997	1061	0	0.63823	0.24155	0.24151	0.674011	760	1	0.63823
NonTargeting_Human_0994	1	0.75861	0.75899	0.999997	1062	0	0.49393	0.24139	0.24136	0.674011	759	1	0.49393
NonTargeting_Human_0446	1	0.75918	0.75958	0.999997	1063	0	0.3492	0.24082	0.24076	0.674011	758	1	0.3492
C7orf26	15	0.75923	0.92	0.999997	1064	3	0.32639	0.18411	0.47453	0.788562	635	7	0.32639
SSX4	15	0.75994	0.92037	0.999997	1065	3	0.054549	0.5856	0.84618	0.999997	1326	5	0.054549
NonTargeting_Human_0343	1	0.76	0.76041	0.999997	1066	0	0.51762	0.24	0.23993	0.67364	756	1	0.51762
NonTargeting_Human_0382	1	0.76099	0.76134	0.999997	1067	0	0.4499	0.23901	0.2389	0.671845	754	1	0.4499
NonTargeting_Human_0917	1	0.76247	0.76276	0.999997	1068	0	0.40536	0.23753	0.23741	0.6698	751	1	0.40536
EPN1	15	0.76258	0.92156	0.999997	1069	3	0.11628	0.6753	0.89438	0.999997	1422	5	0.11628
NonTargeting_Human_0329	1	0.76411	0.76435	0.999997	1070	0	0.46803	0.23589	0.23578	0.666281	749	1	0.46803
NonTargeting_Human_0701	1	0.76534	0.76567	0.999997	1071	0	0.32843	0.23466	0.23465	0.664158	748	1	0.32843
NonTargeting_Human_0654	1	0.7664	0.76685	0.999997	1072	0	0.41088	0.2336	0.23359	0.662205	747	1	0.41088
NonTargeting_Human_0480	1	0.76657	0.76704	0.999997	1073	0	0.30804	0.23343	0.23347	0.662205	745	1	0.30804
NonTargeting_Human_0656	1	0.76673	0.76721	0.999997	1074	0	0.50267	0.23327	0.23328	0.662205	744	1	0.50267
NonTargeting_Human_0960	1	0.76706	0.76752	0.999997	1075	0	0.55334	0.23294	0.23291	0.662205	743	1	0.55334
ZBTB37	15	0.76707	0.92356	0.999997	1076	4	0.017189	0.24521	0.5594	0.837488	766	5	0.017189
NonTargeting_Human_0618	1	0.76722	0.76771	0.999997	1077	0	0.53697	0.23278	0.23278	0.662205	742	1	0.53697
NonTargeting_Human_0947	1	0.76812	0.7687	0.999997	1078	0	0.77712	0.23188	0.23182	0.662205	741	1	0.77712
NonTargeting_Human_0528	1	0.7687	0.76918	0.999997	1079	0	0.45999	0.2313	0.23135	0.662205	740	1	0.45999
NonTargeting_Human_0706	1	0.76886	0.76935	0.999997	1080	0	0.46632	0.23114	0.23118	0.662205	739	1	0.46632
NonTargeting_Human_0041	1	0.76919	0.76964	0.999997	1081	0	0.39311	0.23081	0.23086	0.662205	737	1	0.39311
NonTargeting_Human_0794	1	0.7696	0.77003	0.999997	1082	0	0.66182	0.2304	0.23033	0.662205	736	1	0.66182
NonTargeting_Human_0778	1	0.77157	0.77201	0.999997	1083	0	0.45026	0.22843	0.22851	0.662205	734	1	0.45026
NonTargeting_Human_0057	1	0.77173	0.77223	0.999997	1084	0	0.4107	0.22827	0.22834	0.662205	733	1	0.4107
NonTargeting_Human_0258	1	0.7719	0.7724	0.999997	1085	0	0.47812	0.2281	0.22816	0.662205	732	1	0.47812
AIM1	15	0.77218	0.92592	0.999997	1086	4	0.36286	0.01806	0.092502	0.532998	147	9	0.36286
hsa-mir-7973-1	4	0.77229	0.77421	0.999997	1087	1	-0.19387	0.95738	0.95745	0.999997	1641	0	-0.19387
FZR1	15	0.77299	0.92633	0.999997	1088	4	-0.087224	0.62973	0.87063	0.999997	1378	4	-0.087224
NonTargeting_Human_0063	1	0.77378	0.77426	0.999997	1089	0	0.50757	0.22622	0.22607	0.659025	731	1	0.50757
NonTargeting_Human_0653	1	0.77411	0.77457	0.999997	1090	0	0.44824	0.22589	0.22571	0.659025	730	1	0.44824
NonTargeting_Human_0231	1	0.77419	0.77463	0.999997	1091	0	0.36173	0.22581	0.22565	0.659025	729	1	0.36173
HIST2H2BF	15	0.77501	0.92719	0.999997	1092	4	0.27817	0.05563	0.21643	0.6507	286	9	0.27817
NonTargeting_Human_0097	1	0.77575	0.77626	0.999997	1093	0	0.39655	0.22425	0.22391	0.656007	726	1	0.39655
NonTargeting_Human_0548	1	0.77632	0.77694	0.999997	1094	0	0.48475	0.22368	0.22328	0.655265	724	1	0.48475
PIGQ	15	0.77674	0.92797	0.999997	1095	3	0.032694	0.51639	0.80805	0.990365	1248	4	0.032694
NonTargeting_Human_0513	1	0.77723	0.77789	0.999997	1096	0	0.54135	0.22277	0.22243	0.653856	723	1	0.54135
NonTargeting_Human_0125	1	0.77755	0.77825	0.999997	1097	0	0.41337	0.22245	0.22214	0.653856	722	1	0.41337
NonTargeting_Human_0379	1	0.77796	0.77862	0.999997	1098	0	0.40512	0.22204	0.22179	0.653856	720	1	0.40512
ANKRD35	15	0.77841	0.92872	0.999997	1099	4	0.1084	0.085071	0.2877	0.694809	374	7	0.1084
SPSB3	15	0.77871	0.92885	0.999997	1100	3	0.1916	0.23755	0.54931	0.83108	753	7	0.1916
NonTargeting_Human_0722	1	0.77878	0.77943	0.999997	1101	0	0.65278	0.22122	0.22092	0.652689	719	1	0.65278
PSMD9	15	0.77881	0.9289	0.999997	1102	4	0.16408	0.17484	0.46054	0.780335	615	7	0.16408
TNFRSF4	15	0.77931	0.92911	0.999997	1103	2	0.4106	0.00057328	0.0049025	0.16374	51	12	0.4106
STAM2	15	0.7804	0.92951	0.999997	1104	4	0.10368	0.51117	0.80518	0.990365	1243	5	0.10368
NonTargeting_Human_0735	1	0.78124	0.78192	0.999997	1105	0	0.47174	0.21876	0.21859	0.6507	715	1	0.47174
NonTargeting_Human_0990	1	0.78198	0.78265	0.999997	1106	0	0.54707	0.21802	0.21784	0.6507	714	1	0.54707
RHOT2	15	0.78257	0.9306	0.999997	1107	4	0.19462	0.042293	0.17578	0.625596	235	7	0.19462
NonTargeting_Human_0404	1	0.78289	0.78363	0.999997	1108	0	0.58323	0.21711	0.21695	0.6507	712	1	0.58323
NonTargeting_Human_0849	1	0.78379	0.78449	0.999997	1109	0	0.47487	0.21621	0.21595	0.6507	711	1	0.47487
NonTargeting_Human_0767	1	0.78395	0.78469	0.999997	1110	0	0.50852	0.21605	0.21581	0.6507	710	1	0.50852
NonTargeting_Human_0256	1	0.7842	0.78488	0.999997	1111	0	0.37418	0.2158	0.21558	0.6507	709	1	0.37418
NonTargeting_Human_0814	1	0.78428	0.78499	0.999997	1112	0	0.49175	0.21572	0.21551	0.6507	708	1	0.49175
NonTargeting_Human_0808	1	0.78444	0.78511	0.999997	1113	0	0.62837	0.21556	0.21535	0.6507	707	1	0.62837
NonTargeting_Human_0353	1	0.78461	0.78528	0.999997	1114	0	0.83114	0.21539	0.21513	0.6507	706	1	0.83114
NonTargeting_Human_0782	1	0.78543	0.78613	0.999997	1115	0	0.6009	0.21457	0.21438	0.6507	705	1	0.6009
NonTargeting_Human_0688	1	0.78559	0.78631	0.999997	1116	0	0.57878	0.21441	0.21416	0.6507	704	1	0.57878
NonTargeting_Human_0077	1	0.78674	0.7874	0.999997	1117	0	0.39692	0.21326	0.21294	0.6507	703	1	0.39692
NonTargeting_Human_0879	1	0.78682	0.7875	0.999997	1118	0	0.4666	0.21318	0.21287	0.6507	702	1	0.4666
NonTargeting_Human_0951	1	0.78723	0.78788	0.999997	1119	0	0.68465	0.21277	0.2124	0.6507	701	1	0.68465
NonTargeting_Human_0012	1	0.78805	0.78869	0.999997	1120	0	0.58528	0.21195	0.21156	0.6507	700	1	0.58528
NonTargeting_Human_0124	1	0.78822	0.78884	0.999997	1121	0	0.53294	0.21178	0.21141	0.6507	699	1	0.53294
NonTargeting_Human_0502	1	0.78854	0.78914	0.999997	1122	0	0.43328	0.21146	0.21111	0.6507	698	1	0.43328
NonTargeting_Human_0687	1	0.78871	0.78928	0.999997	1123	0	0.36073	0.21129	0.21096	0.6507	696	1	0.36073
NonTargeting_Human_0370	1	0.78879	0.7894	0.999997	1124	0	0.44984	0.21121	0.2109	0.6507	695	1	0.44984
LIMS3	15	0.78949	0.93349	0.999997	1125	2	0.23877	0.10716	0.33709	0.716722	431	8	0.23877
NonTargeting_Human_0482	1	0.78969	0.79016	0.999997	1126	0	0.49586	0.21031	0.20999	0.6507	694	1	0.49586
NonTargeting_Human_0407	1	0.79035	0.79087	0.999997	1127	0	0.54645	0.20965	0.20941	0.6507	693	1	0.54645
NonTargeting_Human_0398	1	0.79051	0.79103	0.999997	1128	0	0.45501	0.20949	0.20925	0.6507	692	1	0.45501
NonTargeting_Human_0026	1	0.79125	0.79176	0.999997	1129	0	0.63144	0.20875	0.20843	0.6507	691	1	0.63144
NonTargeting_Human_0103	1	0.7915	0.79197	0.999997	1130	0	0.47767	0.2085	0.2082	0.6507	690	1	0.47767
NonTargeting_Human_0509	1	0.79166	0.79214	0.999997	1131	0	0.50197	0.20834	0.20809	0.6507	689	1	0.50197
NonTargeting_Human_0724	1	0.79215	0.79262	0.999997	1132	0	1.0327	0.20785	0.20773	0.6507	688	1	1.0327
NonTargeting_Human_0984	1	0.79314	0.79353	0.999997	1133	0	0.56034	0.20686	0.20674	0.6507	687	1	0.56034
SPAG7	15	0.79352	0.93549	0.999997	1134	3	0.13451	0.3689	0.69069	0.921428	1016	6	0.13451
NonTargeting_Human_0574	1	0.79551	0.79615	0.999997	1135	0	0.58737	0.20449	0.20444	0.65006	683	1	0.58737
NonTargeting_Human_0380	1	0.79625	0.79683	0.999997	1136	0	0.86446	0.20375	0.20355	0.648398	681	1	0.86446
NonTargeting_Human_0983	1	0.79633	0.79689	0.999997	1137	0	0.61982	0.20367	0.20349	0.648398	680	1	0.61982
NonTargeting_Human_0162	1	0.79658	0.79716	0.999997	1138	0	0.56069	0.20342	0.20328	0.648398	678	1	0.56069
GTDC2	15	0.79721	0.93716	0.999997	1139	2	0.54779	0.00046497	0.0039926	0.142756	48	10	0.54779
NonTargeting_Human_0133	1	0.79773	0.79833	0.999997	1140	0	0.48985	0.20227	0.20204	0.647103	677	1	0.48985
NonTargeting_Human_0693	1	0.7983	0.79891	0.999997	1141	0	0.51005	0.2017	0.2015	0.646584	674	1	0.51005
NonTargeting_Human_0099	1	0.79847	0.79904	0.999997	1142	0	0.67403	0.20153	0.20132	0.646584	673	1	0.67403
NonTargeting_Human_0777	1	0.79896	0.79946	0.999997	1143	0	0.72936	0.20104	0.20083	0.646584	671	1	0.72936
KIAA1328	15	0.79911	0.93802	0.999997	1144	3	0.27949	0.13488	0.39524	0.7581	506	8	0.27949
NonTargeting_Human_0962	1	0.80011	0.80068	0.999997	1145	0	0.52326	0.19989	0.1996	0.645218	669	1	0.52326
NonTargeting_Human_0034	1	0.80117	0.80174	0.999997	1146	0	0.51782	0.19883	0.19851	0.644891	668	1	0.51782
NonTargeting_Human_0515	1	0.80142	0.80199	0.999997	1147	0	0.52505	0.19858	0.1983	0.644891	667	1	0.52505
NonTargeting_Human_0075	1	0.80265	0.8032	0.999997	1148	0	0.56446	0.19735	0.19703	0.644035	664	1	0.56446
NonTargeting_Human_0783	1	0.80306	0.80346	0.999997	1149	0	1.0966	0.19694	0.19666	0.644035	662	1	1.0966
NonTargeting_Human_0355	1	0.8033	0.80374	0.999997	1150	0	0.45616	0.1967	0.19643	0.644035	661	1	0.45616
NonTargeting_Human_0584	1	0.80347	0.80393	0.999997	1151	0	1.2276	0.19653	0.19627	0.644035	660	1	1.2276
NonTargeting_Human_0568	1	0.80371	0.80417	0.999997	1152	0	0.54909	0.19629	0.19602	0.644035	659	1	0.54909
NonTargeting_Human_0232	1	0.8038	0.80425	0.999997	1153	0	0.52177	0.1962	0.19596	0.644035	658	1	0.52177
FRY	15	0.80439	0.93952	0.999997	1154	3	0.50516	0.00035079	0.0029415	0.117124	43	12	0.50516
NonTargeting_Human_0036	1	0.80552	0.80602	0.999997	1155	0	0.52916	0.19448	0.19426	0.643368	657	1	0.52916
NonTargeting_Human_0202	1	0.80585	0.8063	0.999997	1156	0	0.49778	0.19415	0.19397	0.643368	656	1	0.49778
NonTargeting_Human_0154	1	0.80601	0.80641	0.999997	1157	0	0.62762	0.19399	0.19381	0.643368	655	1	0.62762
NonTargeting_Human_0875	1	0.80675	0.80706	0.999997	1158	0	0.46241	0.19325	0.19312	0.643235	654	1	0.46241
NonTargeting_Human_0539	1	0.80716	0.80745	0.999997	1159	0	0.80665	0.19284	0.19267	0.64297	652	1	0.80665
WNT3A	15	0.80785	0.94046	0.999997	1160	3	0.2647	0.06143	0.2319	0.662205	305	8	0.2647
NonTargeting_Human_0719	1	0.80839	0.80854	0.999997	1161	0	0.49894	0.19161	0.19146	0.640154	650	1	0.49894
NonTargeting_Human_0954	1	0.80847	0.80863	0.999997	1162	0	0.47449	0.19153	0.19138	0.640154	649	1	0.47449
NonTargeting_Human_0505	1	0.80855	0.80874	0.999997	1163	0	0.66201	0.19145	0.19128	0.640154	648	1	0.66201
NonTargeting_Human_0114	1	0.80987	0.80999	0.999997	1164	0	0.72309	0.19013	0.1899	0.638595	647	1	0.72309
NonTargeting_Human_0928	1	0.81101	0.811	0.999997	1165	0	1.1491	0.18899	0.18888	0.636377	646	1	1.1491
NonTargeting_Human_0265	1	0.81118	0.8112	0.999997	1166	0	0.48038	0.18882	0.18874	0.636377	645	1	0.48038
NonTargeting_Human_0167	1	0.81151	0.81148	0.999997	1167	0	0.63804	0.18849	0.18844	0.636377	644	1	0.63804
NonTargeting_Human_0095	1	0.81249	0.81248	0.999997	1168	0	0.44552	0.18751	0.18747	0.635301	643	1	0.44552
MYOZ3	15	0.81298	0.94195	0.999997	1169	1	0.43761	0.0010381	0.0081463	0.230198	58	11	0.43761
NonTargeting_Human_0807	1	0.81339	0.81338	0.999997	1170	0	0.661	0.18661	0.18648	0.633155	642	1	0.661
NonTargeting_Human_0264	1	0.81388	0.81387	0.999997	1171	0	0.73924	0.18612	0.18591	0.632462	641	1	0.73924
NonTargeting_Human_0197	1	0.81438	0.8143	0.999997	1172	0	0.60169	0.18562	0.18536	0.632462	640	1	0.60169
NonTargeting_Human_0190	1	0.81487	0.81472	0.999997	1173	0	0.49508	0.18513	0.18488	0.632462	639	1	0.49508
NonTargeting_Human_0458	1	0.81536	0.81518	0.999997	1174	0	0.66161	0.18464	0.18441	0.632462	636	1	0.66161
NonTargeting_Human_0040	1	0.81667	0.81655	0.999997	1175	0	0.53126	0.18333	0.18326	0.630794	633	1	0.53126
NonTargeting_Human_0847	1	0.81749	0.81738	0.999997	1176	0	0.52406	0.18251	0.18251	0.629444	632	1	0.52406
NonTargeting_Human_0689	1	0.81807	0.81796	0.999997	1177	0	0.72672	0.18193	0.18194	0.629444	631	1	0.72672
NonTargeting_Human_0760	1	0.8188	0.8186	0.999997	1178	0	0.67321	0.1812	0.18123	0.629444	630	1	0.67321
NonTargeting_Human_0163	1	0.81889	0.81871	0.999997	1179	0	0.50489	0.18111	0.18113	0.629444	629	1	0.50489
NonTargeting_Human_0296	1	0.82036	0.8201	0.999997	1180	0	0.48277	0.17964	0.17968	0.627993	626	1	0.48277
NonTargeting_Human_0072	1	0.82044	0.82017	0.999997	1181	0	0.6547	0.17956	0.17962	0.627993	625	1	0.6547
NonTargeting_Human_0704	1	0.82135	0.82115	0.999997	1182	0	0.51413	0.17865	0.17887	0.627993	624	1	0.51413
NonTargeting_Human_0622	1	0.82159	0.82133	0.999997	1183	0	0.58014	0.17841	0.17864	0.627993	623	1	0.58014
SPDYE1	15	0.82203	0.9443	0.999997	1184	2	0.19148	0.26754	0.58903	0.85288	818	6	0.19148
NonTargeting_Human_0726	1	0.82241	0.82217	0.999997	1185	0	0.48005	0.17759	0.17794	0.627993	622	1	0.48005
NonTargeting_Human_0606	1	0.82389	0.8237	0.999997	1186	0	0.79805	0.17611	0.17639	0.625596	620	1	0.79805
NonTargeting_Human_0308	1	0.82397	0.82376	0.999997	1187	0	0.56289	0.17603	0.17628	0.625596	619	1	0.56289
NonTargeting_Human_0309	1	0.82405	0.82389	0.999997	1188	0	0.5939	0.17595	0.17624	0.625596	618	1	0.5939
NonTargeting_Human_0014	1	0.82454	0.8244	0.999997	1189	0	0.42077	0.17546	0.17585	0.625596	617	1	0.42077
NonTargeting_Human_0718	1	0.82463	0.82449	0.999997	1190	0	0.54036	0.17537	0.17576	0.625596	616	1	0.54036
NonTargeting_Human_0525	1	0.8261	0.82597	0.999997	1191	0	0.46409	0.1739	0.17434	0.625596	613	1	0.46409
NonTargeting_Human_0008	1	0.82619	0.82603	0.999997	1192	0	0.50919	0.17381	0.17425	0.625596	612	1	0.50919
ATP5F1	15	0.8264	0.94563	0.999997	1193	2	0.052617	0.36976	0.69146	0.921428	1020	6	0.052617
NonTargeting_Human_0074	1	0.8266	0.8264	0.999997	1194	0	0.56492	0.1734	0.17385	0.625596	611	1	0.56492
NonTargeting_Human_0193	1	0.8284	0.82822	0.999997	1195	0	0.49487	0.1716	0.17196	0.623773	607	1	0.49487
NonTargeting_Human_0108	1	0.82873	0.82852	0.999997	1196	0	0.55291	0.17127	0.17165	0.623773	606	1	0.55291
NonTargeting_Human_0141	1	0.82881	0.82856	0.999997	1197	0	0.3411	0.17119	0.17159	0.623773	605	1	0.3411
NonTargeting_Human_0586	1	0.82889	0.82862	0.999997	1198	0	0.52212	0.17111	0.17147	0.623773	604	1	0.52212
NonTargeting_Human_0671	1	0.82922	0.82894	0.999997	1199	0	0.71892	0.17078	0.17114	0.623773	603	1	0.71892
NonTargeting_Human_0428	1	0.82979	0.82959	0.999997	1200	0	0.66502	0.17021	0.17064	0.623773	602	1	0.66502
NonTargeting_Human_0198	1	0.8307	0.83045	0.999997	1201	0	0.47157	0.1693	0.1698	0.623669	601	1	0.47157
NonTargeting_Human_0619	1	0.83168	0.83145	0.999997	1202	0	0.70836	0.16832	0.16882	0.621381	599	1	0.70836
NonTargeting_Human_0173	1	0.83209	0.83183	0.999997	1203	0	0.65252	0.16791	0.16834	0.620917	598	1	0.65252
NonTargeting_Human_0022	1	0.83217	0.8319	0.999997	1204	0	0.50414	0.16783	0.16826	0.620917	597	1	0.50414
NonTargeting_Human_0552	1	0.83275	0.83246	0.999997	1205	0	0.98304	0.16725	0.1677	0.620917	595	1	0.98304
NonTargeting_Human_0597	1	0.83307	0.83276	0.999997	1206	0	0.53189	0.16693	0.16734	0.620917	593	1	0.53189
NonTargeting_Human_0174	1	0.83357	0.83323	0.999997	1207	0	0.50914	0.16643	0.16695	0.620917	592	1	0.50914
NonTargeting_Human_0924	1	0.83455	0.83436	0.999997	1208	0	0.7496	0.16545	0.16597	0.618675	590	1	0.7496
SLC35F5	15	0.83461	0.94805	0.999997	1209	3	0.53878	2.0545e-05	0.00019497	0.014233	24	12	0.53878
NonTargeting_Human_0565	1	0.83488	0.83461	0.999997	1210	0	0.43585	0.16512	0.16558	0.618537	589	1	0.43585
NonTargeting_Human_0123	1	0.83545	0.83515	0.999997	1211	0	0.42321	0.16455	0.16509	0.61804	587	1	0.42321
C1orf198	15	0.83553	0.94831	0.999997	1212	3	0.3907	0.034243	0.14939	0.60978	210	8	0.3907
NonTargeting_Human_0812	1	0.83553	0.83526	0.999997	1213	0	0.99342	0.16447	0.165	0.61804	586	1	0.99342
NonTargeting_Human_0120	1	0.83562	0.83533	0.999997	1214	0	0.51016	0.16438	0.16493	0.61804	585	1	0.51016
NonTargeting_Human_0116	1	0.83594	0.83569	0.999997	1215	0	0.51287	0.16406	0.16455	0.61804	584	1	0.51287
NonTargeting_Human_0680	1	0.83611	0.83585	0.999997	1216	0	0.92359	0.16389	0.16438	0.61804	583	1	0.92359
NonTargeting_Human_0373	1	0.83619	0.83592	0.999997	1217	0	0.4184	0.16381	0.16431	0.61804	582	1	0.4184
NonTargeting_Human_0129	1	0.83652	0.83628	0.999997	1218	0	0.81421	0.16348	0.16398	0.61804	581	1	0.81421
NDUFV1	15	0.83712	0.94887	0.999997	1219	1	0.1127	0.49755	0.7976	0.988261	1220	4	0.1127
NonTargeting_Human_0344	1	0.83783	0.83773	0.999997	1220	0	0.63248	0.16217	0.16282	0.61804	579	1	0.63248
NonTargeting_Human_0462	1	0.83791	0.83782	0.999997	1221	0	0.7535	0.16209	0.16272	0.61804	578	1	0.7535
NonTargeting_Human_0851	1	0.83808	0.83798	0.999997	1222	0	0.74316	0.16192	0.16255	0.61804	577	1	0.74316
NonTargeting_Human_0360	1	0.83816	0.83803	0.999997	1223	0	0.58273	0.16184	0.16247	0.61804	576	1	0.58273
NonTargeting_Human_0319	1	0.83857	0.83843	0.999997	1224	0	0.5866	0.16143	0.16204	0.61804	575	1	0.5866
NonTargeting_Human_0754	1	0.83906	0.83899	0.999997	1225	0	0.51481	0.16094	0.16156	0.61804	573	1	0.51481
NonTargeting_Human_0389	1	0.83931	0.83921	0.999997	1226	0	0.91847	0.16069	0.16128	0.61804	572	1	0.91847
NonTargeting_Human_0855	1	0.83939	0.83926	0.999997	1227	0	0.55902	0.16061	0.16119	0.61804	571	1	0.55902
NonTargeting_Human_0885	1	0.84045	0.84041	0.999997	1228	0	1.1225	0.15955	0.16015	0.61804	569	1	1.1225
STOML3	15	0.84062	0.9498	0.999997	1229	3	0.13656	0.51758	0.80874	0.990365	1250	3	0.13656
NonTargeting_Human_0118	1	0.84111	0.84117	0.999997	1230	0	0.62233	0.15889	0.15952	0.61804	568	1	0.62233
NonTargeting_Human_0423	1	0.84144	0.84147	0.999997	1231	0	0.54375	0.15856	0.15919	0.61804	567	1	0.54375
NonTargeting_Human_0790	1	0.84168	0.84169	0.999997	1232	0	1.0372	0.15832	0.15899	0.61804	566	1	1.0372
NonTargeting_Human_0909	1	0.84226	0.84239	0.999997	1233	0	0.66645	0.15774	0.15833	0.61804	564	1	0.66645
NonTargeting_Human_0243	1	0.84234	0.84248	0.999997	1234	0	0.61908	0.15766	0.15827	0.61804	563	1	0.61908
NonTargeting_Human_0016	1	0.84259	0.84266	0.999997	1235	0	0.5625	0.15741	0.1579	0.61804	562	1	0.5625
NonTargeting_Human_0929	1	0.843	0.8431	0.999997	1236	0	0.54189	0.157	0.15751	0.61804	561	1	0.54189
NonTargeting_Human_0607	1	0.84414	0.84421	0.999997	1237	0	0.98604	0.15586	0.15635	0.61804	559	1	0.98604
NonTargeting_Human_0456	1	0.84455	0.84458	0.999997	1238	0	0.53818	0.15545	0.15595	0.61804	558	1	0.53818
NonTargeting_Human_0508	1	0.84554	0.84556	0.999997	1239	0	0.69072	0.15446	0.15512	0.616252	556	1	0.69072
NonTargeting_Human_0810	1	0.84562	0.84568	0.999997	1240	0	0.76929	0.15438	0.15505	0.616252	555	1	0.76929
NonTargeting_Human_0530	1	0.84587	0.84588	0.999997	1241	0	0.40546	0.15413	0.15485	0.616252	554	1	0.40546
NonTargeting_Human_0368	1	0.84644	0.84652	0.999997	1242	0	0.61944	0.15356	0.15426	0.616252	553	1	0.61944
INO80D	15	0.84721	0.95193	0.999997	1243	1	0.40868	0.011791	0.064546	0.477148	121	9	0.40868
NonTargeting_Human_0803	1	0.84825	0.84826	0.999997	1244	0	0.70526	0.15175	0.15251	0.612828	551	1	0.70526
NonTargeting_Human_0620	1	0.84857	0.84854	0.999997	1245	0	0.99229	0.15143	0.1522	0.612828	550	1	0.99229
NonTargeting_Human_0877	1	0.84956	0.84945	0.999997	1246	0	0.61473	0.15044	0.15133	0.610884	549	1	0.61473
NonTargeting_Human_0372	1	0.85013	0.85007	0.999997	1247	0	0.66792	0.14987	0.1507	0.60978	548	1	0.66792
NonTargeting_Human_0417	1	0.85103	0.85087	0.999997	1248	0	0.6225	0.14897	0.14981	0.60978	546	1	0.6225
NonTargeting_Human_0791	1	0.8512	0.85103	0.999997	1249	0	0.84362	0.1488	0.14966	0.60978	545	1	0.84362
C10orf53	15	0.85142	0.9532	0.999997	1250	2	0.22843	0.10832	0.33939	0.71726	432	8	0.22843
NonTargeting_Human_0705	1	0.85185	0.8516	0.999997	1251	0	0.45271	0.14815	0.149	0.60978	543	1	0.45271
NonTargeting_Human_0432	1	0.85267	0.85252	0.999997	1252	0	0.45669	0.14733	0.14821	0.60978	541	1	0.45669
NonTargeting_Human_0664	1	0.85407	0.85383	0.999997	1253	0	0.49804	0.14593	0.14681	0.606634	537	1	0.49804
NonTargeting_Human_0506	1	0.85423	0.85399	0.999997	1254	0	0.82727	0.14577	0.14668	0.606634	536	1	0.82727
NonTargeting_Human_0053	1	0.85448	0.85426	0.999997	1255	0	0.6052	0.14552	0.14644	0.606634	535	1	0.6052
NonTargeting_Human_0045	1	0.85513	0.85494	0.999997	1256	0	0.67443	0.14487	0.14591	0.606634	534	1	0.67443
NonTargeting_Human_0744	1	0.85522	0.85505	0.999997	1257	0	0.52643	0.14478	0.14584	0.606634	533	1	0.52643
NonTargeting_Human_0762	1	0.8553	0.85517	0.999997	1258	0	0.59656	0.1447	0.14576	0.606634	532	1	0.59656
NonTargeting_Human_0519	1	0.85571	0.85567	0.999997	1259	0	0.5298	0.14429	0.14543	0.606634	531	1	0.5298
CLDND2	15	0.85572	0.95461	0.999997	1260	1	0.40578	0.0020244	0.014176	0.306097	68	10	0.40578
USP50	15	0.857	0.95497	0.999997	1261	3	0.28025	0.13503	0.39555	0.7581	507	8	0.28025
NonTargeting_Human_0387	1	0.85735	0.8574	0.999997	1262	0	0.67425	0.14265	0.1438	0.605326	530	1	0.67425
STARD4	15	0.85773	0.95519	0.999997	1263	2	0.53345	0.018645	0.094763	0.535564	150	8	0.53345
NonTargeting_Human_0976	1	0.85776	0.85786	0.999997	1264	0	0.65331	0.14224	0.14344	0.605326	528	1	0.65331
NonTargeting_Human_0438	1	0.85809	0.85817	0.999997	1265	0	0.65628	0.14191	0.14308	0.605326	527	1	0.65628
NonTargeting_Human_0226	1	0.85841	0.85851	0.999997	1266	0	0.54645	0.14159	0.14273	0.605326	526	1	0.54645
CCDC169-SOHLH2	15	0.85892	0.95553	0.999997	1267	2	0.16785	0.17252	0.45717	0.778761	610	5	0.16785
NonTargeting_Human_0020	1	0.85899	0.85909	0.999997	1268	0	0.50441	0.14101	0.14216	0.605326	524	1	0.50441
NonTargeting_Human_0628	1	0.85956	0.85961	0.999997	1269	0	0.53257	0.14044	0.14153	0.604794	521	1	0.53257
NonTargeting_Human_0024	1	0.85989	0.85996	0.999997	1270	0	0.84906	0.14011	0.14115	0.604794	520	1	0.84906
NonTargeting_Human_0135	1	0.86005	0.86016	0.999997	1271	0	0.60874	0.13995	0.14096	0.604794	519	1	0.60874
TRIM8	15	0.86152	0.95628	0.999997	1272	3	0.30917	0.026834	0.12421	0.5793	181	9	0.30917
NonTargeting_Human_0068	1	0.86202	0.86204	0.999997	1273	0	0.40839	0.13798	0.13902	0.604366	515	1	0.40839
hsa-mir-532	15	0.86225	0.95652	0.999997	1274	3	0.21978	0.13119	0.38797	0.748451	497	8	0.21978
PSMD5	15	0.8629	0.9567	0.999997	1275	2	0.2196	0.13712	0.39959	0.75891	512	8	0.2196
NonTargeting_Human_0021	1	0.86309	0.86312	0.999997	1276	0	0.56602	0.13691	0.13793	0.601116	511	1	0.56602
NonTargeting_Human_0529	1	0.86383	0.86394	0.999997	1277	0	0.4999	0.13617	0.13724	0.599627	510	1	0.4999
NonTargeting_Human_0331	1	0.86432	0.86443	0.999997	1278	0	0.66299	0.13568	0.13676	0.598998	508	1	0.66299
NonTargeting_Human_0422	1	0.86522	0.86523	0.999997	1279	0	0.66658	0.13478	0.13575	0.597025	505	1	0.66658
NonTargeting_Human_0905	1	0.8653	0.86528	0.999997	1280	0	0.80698	0.1347	0.13569	0.597025	504	1	0.80698
NonTargeting_Human_0534	1	0.86579	0.86579	0.999997	1281	0	0.55671	0.13421	0.13523	0.597025	502	1	0.55671
NonTargeting_Human_0233	1	0.86661	0.86662	0.999997	1282	0	0.57825	0.13339	0.13447	0.597025	501	1	0.57825
PRELP	15	0.86719	0.95814	0.999997	1283	3	0.4242	0.031395	0.13993	0.604794	200	8	0.4242
NonTargeting_Human_0887	1	0.86752	0.86752	0.999997	1284	0	0.60452	0.13248	0.13362	0.597025	500	1	0.60452
NonTargeting_Human_0662	1	0.86817	0.86814	0.999997	1285	0	0.66438	0.13183	0.13291	0.595541	499	1	0.66438
NonTargeting_Human_0466	1	0.86858	0.86851	0.999997	1286	0	0.91068	0.13142	0.13249	0.595164	498	1	0.91068
NonTargeting_Human_0219	1	0.86899	0.86888	0.999997	1287	0	0.68435	0.13101	0.13203	0.594658	496	1	0.68435
NonTargeting_Human_0094	1	0.86907	0.86897	0.999997	1288	0	0.66443	0.13093	0.13193	0.594658	495	1	0.66443
NonTargeting_Human_0468	1	0.86916	0.86901	0.999997	1289	0	0.55343	0.13084	0.13189	0.594658	494	1	0.55343
NonTargeting_Human_0055	1	0.86924	0.86907	0.999997	1290	0	0.68144	0.13076	0.13178	0.594658	493	1	0.68144
NonTargeting_Human_0402	1	0.86932	0.86911	0.999997	1291	0	0.66778	0.13068	0.13168	0.594658	492	1	0.66778
NonTargeting_Human_0524	1	0.86981	0.86958	0.999997	1292	0	0.64358	0.13019	0.13113	0.594658	491	1	0.64358
NonTargeting_Human_0252	1	0.86998	0.86979	0.999997	1293	0	0.52614	0.13002	0.13097	0.594658	490	1	0.52614
PAGE4	15	0.87044	0.95929	0.999997	1294	2	0.056808	0.25643	0.57451	0.847256	792	5	0.056808
KIF3C	15	0.87209	0.95978	0.999997	1295	3	0.376	0.016701	0.086676	0.527279	139	9	0.376
NonTargeting_Human_0781	1	0.87268	0.87247	0.999997	1296	0	0.63144	0.12732	0.12834	0.591701	488	1	0.63144
NonTargeting_Human_0948	1	0.87539	0.87521	0.999997	1297	0	0.56699	0.12461	0.12573	0.582757	483	1	0.56699
BST2	15	0.87543	0.96093	0.999997	1298	2	-0.013042	0.71238	0.91115	0.999997	1470	3	-0.013042
KCNU1	15	0.8757	0.96097	0.999997	1299	2	0.17492	0.12438	0.37338	0.740842	482	7	0.17492
CCDC101	15	0.87572	0.96098	0.999997	1300	3	0.18297	0.13577	0.39694	0.7581	509	8	0.18297
NonTargeting_Human_0142	1	0.87605	0.87576	0.999997	1301	0	0.61683	0.12395	0.12519	0.581808	481	1	0.61683
NonTargeting_Human_0696	1	0.87695	0.87664	0.999997	1302	0	0.73111	0.12305	0.12432	0.5793	478	1	0.73111
NonTargeting_Human_0863	1	0.87711	0.87685	0.999997	1303	0	0.66334	0.12289	0.12415	0.5793	476	1	0.66334
NonTargeting_Human_0341	1	0.87719	0.87696	0.999997	1304	0	0.58131	0.12281	0.12405	0.5793	475	1	0.58131
ZNF646	15	0.8772	0.96148	0.999997	1305	2	0.13349	0.37065	0.69218	0.921503	1026	6	0.13349
NonTargeting_Human_0804	1	0.8776	0.87743	0.999997	1306	0	0.74502	0.1224	0.1236	0.5793	474	1	0.74502
NonTargeting_Human_0550	1	0.87851	0.87826	0.999997	1307	0	0.78164	0.12149	0.12267	0.5793	473	1	0.78164
NonTargeting_Human_0609	1	0.87875	0.87851	0.999997	1308	0	0.63096	0.12125	0.12239	0.5793	472	1	0.63096
SMARCB1	15	0.87917	0.96206	0.999997	1309	1	0.42544	0.056016	0.2177	0.6507	289	9	0.42544
NonTargeting_Human_0533	1	0.87924	0.87904	0.999997	1310	0	0.81669	0.12076	0.12193	0.5793	471	1	0.81669
CHRND	15	0.87934	0.96211	0.999997	1311	2	0.45935	0.0012498	0.0094404	0.258431	60	9	0.45935
NonTargeting_Human_0816	1	0.87957	0.87939	0.999997	1312	0	0.57854	0.12043	0.12165	0.5793	469	1	0.57854
NonTargeting_Human_0130	1	0.88023	0.88002	0.999997	1313	0	0.77482	0.11977	0.12108	0.5793	466	1	0.77482
NonTargeting_Human_0013	1	0.88031	0.88013	0.999997	1314	0	0.62227	0.11969	0.12096	0.5793	465	1	0.62227
NonTargeting_Human_0698	1	0.88162	0.88154	0.999997	1315	0	0.71476	0.11838	0.11961	0.578526	464	1	0.71476
NonTargeting_Human_0975	1	0.88179	0.88174	0.999997	1316	0	0.58268	0.11821	0.11944	0.578526	463	1	0.58268
NonTargeting_Human_0498	1	0.88203	0.88206	0.999997	1317	0	0.84469	0.11797	0.11923	0.578526	462	1	0.84469
NonTargeting_Human_0469	1	0.88236	0.88233	0.999997	1318	0	0.56262	0.11764	0.11888	0.578526	461	1	0.56262
ARPC5L	15	0.88238	0.96308	0.999997	1319	1	0.65488	2.8094e-06	1.9779e-05	0.002166	16	11	0.65488
NonTargeting_Human_0674	1	0.88244	0.88239	0.999997	1320	0	0.6116	0.11756	0.11878	0.578526	460	1	0.6116
NonTargeting_Human_0156	1	0.88261	0.88258	0.999997	1321	0	0.83894	0.11739	0.11862	0.578526	459	1	0.83894
NonTargeting_Human_0657	1	0.8831	0.883	0.999997	1322	0	0.77029	0.1169	0.11806	0.578526	458	1	0.77029
ABHD14B	15	0.88321	0.96329	0.999997	1323	1	0.21008	0.3851	0.70461	0.92678	1046	6	0.21008
NonTargeting_Human_0892	1	0.88334	0.8832	0.999997	1324	0	1.1638	0.11666	0.11779	0.578526	457	1	1.1638
CCL14	15	0.88338	0.96334	0.999997	1325	1	0.42992	0.019556	0.098199	0.537639	157	9	0.42992
NonTargeting_Human_0651	1	0.88359	0.88345	0.999997	1326	0	0.5288	0.11641	0.11754	0.578526	456	1	0.5288
NonTargeting_Human_0004	1	0.88375	0.88367	0.999997	1327	0	0.59857	0.11625	0.11737	0.578526	454	1	0.59857
NonTargeting_Human_0916	1	0.88384	0.88375	0.999997	1328	0	0.7071	0.11616	0.11729	0.578526	453	1	0.7071
NonTargeting_Human_0115	1	0.88457	0.88451	0.999997	1329	0	0.68596	0.11543	0.1166	0.578526	452	1	0.68596
NonTargeting_Human_0610	1	0.88531	0.88535	0.999997	1330	0	0.69754	0.11469	0.11588	0.578526	449	1	0.69754
NonTargeting_Human_0517	1	0.88548	0.88557	0.999997	1331	0	0.76074	0.11452	0.11568	0.578526	448	1	0.76074
NonTargeting_Human_0558	1	0.88572	0.88586	0.999997	1332	0	0.66511	0.11428	0.11546	0.578526	447	1	0.66511
SRGAP2	15	0.88657	0.96446	0.999997	1333	2	0.18609	0.10624	0.33486	0.716722	430	7	0.18609
NonTargeting_Human_0846	1	0.88662	0.88687	0.999997	1334	0	0.57691	0.11338	0.11462	0.578526	445	1	0.57691
NonTargeting_Human_0761	1	0.88712	0.88733	0.999997	1335	0	0.90992	0.11288	0.1141	0.578526	444	1	0.90992
TMEM183A	15	0.88733	0.96473	0.999997	1336	3	0.10696	0.1142	0.35186	0.727572	446	7	0.10696
NonTargeting_Human_0239	1	0.88785	0.88809	0.999997	1337	0	0.70151	0.11215	0.11343	0.577985	441	1	0.70151
NonTargeting_Human_0476	1	0.88818	0.88841	0.999997	1338	0	1.0262	0.11182	0.11317	0.577985	440	1	1.0262
NonTargeting_Human_0640	1	0.88826	0.8885	0.999997	1339	0	0.72923	0.11174	0.11306	0.577985	439	1	0.72923
NonTargeting_Human_0742	1	0.88892	0.8891	0.999997	1340	0	0.70325	0.11108	0.11236	0.577985	438	1	0.70325
CIAPIN1	15	0.8905	0.9658	0.999997	1341	3	0.17108	0.085565	0.28887	0.694809	377	6	0.17108
NonTargeting_Human_0172	1	0.89081	0.89096	0.999997	1342	0	0.84648	0.10919	0.11064	0.57351	436	1	0.84648
NonTargeting_Human_0464	1	0.89097	0.89117	0.999997	1343	0	0.90762	0.10903	0.11041	0.57351	434	1	0.90762
NonTargeting_Human_0203	1	0.89155	0.8918	0.999997	1344	0	0.55764	0.10845	0.10973	0.57218	433	1	0.55764
MSI2	15	0.89384	0.96693	0.999997	1345	3	0.60128	0.0018905	0.01343	0.306097	66	11	0.60128
NonTargeting_Human_0042	1	0.89392	0.89418	0.999997	1346	0	0.85574	0.10608	0.10727	0.564371	429	1	0.85574
NonTargeting_Human_0444	1	0.89425	0.89453	0.999997	1347	0	0.75255	0.10575	0.10698	0.564371	428	1	0.75255
COX5B	15	0.8943	0.96704	0.999997	1348	2	0.36464	0.054884	0.21423	0.6507	283	8	0.36464
NonTargeting_Human_0302	1	0.89433	0.89465	0.999997	1349	0	0.59028	0.10567	0.10686	0.564371	427	1	0.59028
NonTargeting_Human_0955	1	0.89442	0.89471	0.999997	1350	0	1.1051	0.10558	0.1068	0.564371	426	1	1.1051
hsa-mir-6508	8	0.89479	0.92131	0.999997	1351	1	1.0218	0.004876	0.024851	0.346731	94	6	1.0218
NonTargeting_Human_0401	1	0.89589	0.89621	0.999997	1352	0	0.78383	0.10411	0.10524	0.560429	425	1	0.78383
NonTargeting_Human_0798	1	0.89679	0.89708	0.999997	1353	0	0.67741	0.10321	0.10436	0.557459	424	1	0.67741
NonTargeting_Human_0731	1	0.89794	0.89823	0.999997	1354	0	0.92912	0.10206	0.10323	0.553078	423	1	0.92912
LGR5	15	0.89796	0.96806	0.999997	1355	3	0.1713	0.22384	0.53054	0.820397	725	6	0.1713
NonTargeting_Human_0670	1	0.89876	0.89899	0.999997	1356	0	0.64609	0.10124	0.10245	0.550583	421	1	0.64609
hsa-mir-1229	15	0.89901	0.9684	0.999997	1357	3	0.23805	0.14121	0.4077	0.762329	525	8	0.23805
NonTargeting_Human_0577	1	0.89942	0.89976	0.999997	1358	0	0.98758	0.10058	0.10177	0.548621	420	1	0.98758
NonTargeting_Human_0802	1	0.9004	0.90094	0.999997	1359	0	1.0779	0.099598	0.10055	0.543714	418	1	1.0779
NonTargeting_Human_0409	1	0.90057	0.90108	0.999997	1360	0	0.67488	0.099434	0.10035	0.543714	417	1	0.67488
NonTargeting_Human_0059	1	0.90196	0.90242	0.999997	1361	0	0.8796	0.09804	0.098888	0.539727	416	1	0.8796
hsa-mir-638	15	0.90235	0.96958	0.999997	1362	3	0.19234	0.12389	0.3724	0.739729	480	7	0.19234
NonTargeting_Human_0564	1	0.90286	0.90326	0.999997	1363	0	0.69858	0.097138	0.097922	0.537639	414	1	0.69858
NonTargeting_Human_0966	1	0.90294	0.90336	0.999997	1364	0	0.92287	0.097056	0.097837	0.537639	413	1	0.92287
NonTargeting_Human_0919	1	0.90311	0.90355	0.999997	1365	0	0.86888	0.096892	0.097673	0.537639	412	1	0.86888
MCCC2	15	0.90314	0.96987	0.999997	1366	3	0.20463	0.045556	0.18582	0.632462	252	5	0.20463
NXPH2	15	0.90316	0.96988	0.999997	1367	3	0.10054	0.12296	0.37043	0.738102	477	6	0.10054
NonTargeting_Human_0540	1	0.90385	0.90425	0.999997	1368	0	0.68734	0.096154	0.09695	0.537639	410	1	0.68734
NonTargeting_Human_0472	1	0.90409	0.90447	0.999997	1369	0	0.87456	0.095908	0.096718	0.537639	409	1	0.87456
NonTargeting_Human_0421	1	0.90491	0.90532	0.999997	1370	0	0.64609	0.095088	0.096023	0.537639	407	1	0.64609
NonTargeting_Human_0532	1	0.90532	0.9057	0.999997	1371	0	0.73299	0.094678	0.095588	0.537639	406	1	0.73299
IRS4	15	0.90613	0.97089	0.999997	1372	2	0.45761	0.0028649	0.01937	0.311116	81	9	0.45761
NonTargeting_Human_0891	1	0.90647	0.9068	0.999997	1373	0	0.58844	0.09353	0.094345	0.534926	404	1	0.58844
AHSP	15	0.90658	0.97106	0.999997	1374	3	0.37831	0.027825	0.12771	0.590363	184	9	0.37831
RALB	15	0.90683	0.97119	0.999997	1375	2	0.19679	0.29814	0.62586	0.874465	887	5	0.19679
NonTargeting_Human_0499	1	0.90704	0.90744	0.999997	1376	0	0.67541	0.092956	0.093701	0.532998	403	1	0.67541
NonTargeting_Human_0277	1	0.90713	0.90751	0.999997	1377	0	0.64472	0.092874	0.093565	0.532998	402	1	0.64472
NonTargeting_Human_0958	1	0.90754	0.90788	0.999997	1378	0	0.54462	0.092464	0.093231	0.532998	401	1	0.54462
NonTargeting_Human_0378	1	0.9077	0.90809	0.999997	1379	0	0.88801	0.092299	0.093085	0.532998	399	1	0.88801
NonTargeting_Human_0937	1	0.9086	0.90898	0.999997	1380	0	0.75527	0.091397	0.092073	0.532382	396	1	0.75527
NonTargeting_Human_0420	1	0.90885	0.90924	0.999997	1381	0	0.99123	0.091151	0.09183	0.532382	394	1	0.99123
NonTargeting_Human_0805	1	0.90959	0.90994	0.999997	1382	0	0.60402	0.090413	0.091107	0.530361	392	1	0.60402
hsa-mir-6831	12	0.90993	0.96007	0.999997	1383	2	0.15606	0.20428	0.48061	0.793614	682	6	0.15606
NonTargeting_Human_0199	1	0.91032	0.91058	0.999997	1384	0	0.89366	0.089675	0.090344	0.529372	390	1	0.89366
FZD6	15	0.91035	0.97248	0.999997	1385	3	0.17726	0.04415	0.1815	0.629444	246	6	0.17726
NonTargeting_Human_0650	1	0.91057	0.91081	0.999997	1386	0	0.58199	0.089429	0.090106	0.529372	389	1	0.58199
NonTargeting_Human_0906	1	0.91123	0.91154	0.999997	1387	0	0.66195	0.088773	0.089394	0.527969	388	1	0.66195
NonTargeting_Human_0646	1	0.91131	0.91161	0.999997	1388	0	0.80256	0.088691	0.089326	0.527969	387	1	0.80256
NonTargeting_Human_0757	1	0.91139	0.91163	0.999997	1389	0	0.86054	0.088609	0.089259	0.527969	386	1	0.86054
NonTargeting_Human_0866	1	0.91196	0.91218	0.999997	1390	0	1.2156	0.088035	0.088733	0.527969	385	1	1.2156
NonTargeting_Human_0208	1	0.91213	0.91235	0.999997	1391	0	0.86589	0.087871	0.088569	0.527969	384	1	0.86589
TNFRSF8	15	0.91244	0.97329	0.999997	1392	3	0.65811	0.00042273	0.0036648	0.139582	45	9	0.65811
NonTargeting_Human_0997	1	0.91278	0.91312	0.999997	1393	0	1.4082	0.087215	0.087942	0.527969	382	1	1.4082
DOCK5	15	0.91282	0.9734	0.999997	1394	2	0.059345	0.5329	0.81703	0.996579	1265	5	0.059345
SP140	15	0.91315	0.97349	0.999997	1395	2	0.52607	0.0057178	0.035301	0.391434	98	8	0.52607
NonTargeting_Human_0035	1	0.91344	0.91373	0.999997	1396	0	0.70196	0.086559	0.087286	0.52733	381	1	0.70196
B4GALT2	15	0.91345	0.97359	0.999997	1397	1	0.694	1.0043e-06	8.4769e-06	0.001061	14	14	0.694
NonTargeting_Human_0388	1	0.91361	0.91389	0.999997	1398	0	0.72663	0.086395	0.087145	0.52733	380	1	0.72663
NonTargeting_Human_0136	1	0.91443	0.91469	0.999997	1399	0	0.94317	0.085575	0.086393	0.527279	378	1	0.94317
NonTargeting_Human_0570	1	0.91451	0.91479	0.999997	1400	0	0.89874	0.085493	0.086348	0.527279	376	1	0.89874
GTPBP5	15	0.9148	0.97414	0.999997	1401	3	0.044267	0.09964	0.32079	0.709569	419	6	0.044267
NonTargeting_Human_0113	1	0.91484	0.91517	0.999997	1402	0	0.81532	0.085165	0.086037	0.527279	375	1	0.81532
NonTargeting_Human_0087	1	0.91549	0.91566	0.999997	1403	0	0.97976	0.084509	0.085438	0.527071	372	1	0.97976
FER	15	0.91571	0.97441	0.999997	1404	3	0.19833	0.055698	0.21663	0.6507	287	6	0.19833
NonTargeting_Human_0557	1	0.9159	0.91609	0.999997	1405	0	0.71164	0.084099	0.085071	0.526659	371	1	0.71164
NonTargeting_Human_0980	1	0.91623	0.91646	0.999997	1406	0	1.265	0.083771	0.084738	0.526455	370	1	1.265
NonTargeting_Human_0826	1	0.91648	0.91669	0.999997	1407	0	0.92239	0.083525	0.084506	0.526455	369	1	0.92239
NonTargeting_Human_0669	1	0.91664	0.9169	0.999997	1408	0	0.91838	0.083361	0.08437	0.526455	368	1	0.91838
NonTargeting_Human_0595	1	0.91672	0.91696	0.999997	1409	0	0.71882	0.083279	0.084286	0.526455	367	1	0.71882
NonTargeting_Human_0010	1	0.91713	0.91752	0.999997	1410	0	0.78873	0.082869	0.083856	0.526455	366	1	0.78873
NonTargeting_Human_0229	1	0.91721	0.91761	0.999997	1411	0	0.59881	0.082787	0.083743	0.526455	364	1	0.59881
ZNF22	15	0.91723	0.97485	0.999997	1412	2	0.21021	0.055009	0.21458	0.6507	284	7	0.21021
NonTargeting_Human_0269	1	0.91738	0.91776	0.999997	1413	0	0.58148	0.082623	0.083551	0.526455	363	1	0.58148
EFCAB5	15	0.91781	0.97505	0.999997	1414	3	0.26624	0.12614	0.37697	0.742957	486	8	0.26624
UHRF2	15	0.918	0.97511	0.999997	1415	3	0.11843	0.40094	0.7188	0.935618	1069	4	0.11843
NonTargeting_Human_0131	1	0.91877	0.91907	0.999997	1416	0	0.81884	0.081228	0.08224	0.525855	359	1	0.81884
GINS2	15	0.91928	0.97557	0.999997	1417	3	0.60776	0.022517	0.1089	0.56975	163	9	0.60776
NonTargeting_Human_0284	1	0.92	0.92026	0.999997	1418	0	0.6853	0.079998	0.080923	0.519331	358	1	0.6853
EGFR	15	0.92033	0.97593	0.999997	1419	1	0.61498	0.00013617	0.0013083	0.063669	36	12	0.61498
NonTargeting_Human_0416	1	0.92033	0.92061	0.999997	1420	0	0.74907	0.07967	0.080561	0.51891	357	1	0.74907
NonTargeting_Human_0295	1	0.9214	0.92164	0.999997	1421	0	0.93722	0.078604	0.079465	0.513737	355	1	0.93722
NonTargeting_Human_0876	1	0.92172	0.92197	0.999997	1422	0	1.4929	0.078276	0.079166	0.513696	353	1	1.4929
CCDC43	15	0.92184	0.97641	0.999997	1423	2	0.42245	0.0093054	0.052966	0.443363	114	10	0.42245
ZFR	15	0.92194	0.97644	0.999997	1424	2	0.46929	0.0087684	0.050339	0.440643	111	9	0.46929
ORMDL3	15	0.92254	0.97662	0.999997	1425	2	0.23653	0.1979	0.49428	0.801541	665	7	0.23653
CNTN6	15	0.92271	0.97669	0.999997	1426	3	0.19296	0.06869	0.24925	0.677904	327	7	0.19296
AMTN	15	0.92274	0.97671	0.999997	1427	2	0.23271	0.11485	0.35308	0.727572	451	7	0.23271
ZFAND1	15	0.92485	0.97758	0.999997	1428	3	0.051626	0.23358	0.54382	0.828493	746	6	0.051626
NonTargeting_Human_0062	1	0.92517	0.9255	0.999997	1429	0	0.71634	0.074832	0.075588	0.494144	350	1	0.71634
NonTargeting_Human_0901	1	0.92574	0.92594	0.999997	1430	0	1.5597	0.074258	0.074984	0.492027	349	1	1.5597
NonTargeting_Human_0526	1	0.92632	0.92655	0.999997	1431	0	0.79126	0.073684	0.07439	0.489969	348	1	0.79126
NonTargeting_Human_0038	1	0.9264	0.9266	0.999997	1432	0	0.81221	0.073602	0.074322	0.489969	347	1	0.81221
NonTargeting_Human_0338	1	0.92656	0.92671	0.999997	1433	0	0.99631	0.073438	0.074119	0.489969	346	1	0.99631
NonTargeting_Human_0583	1	0.92714	0.92724	0.999997	1434	0	1.3895	0.072864	0.073593	0.489969	345	1	1.3895
NonTargeting_Human_0235	1	0.92746	0.92754	0.999997	1435	0	0.7759	0.072536	0.073226	0.489664	344	1	0.7759
NonTargeting_Human_0270	1	0.92755	0.92763	0.999997	1436	0	0.74886	0.072454	0.073147	0.489664	343	1	0.74886
ZNF124	15	0.92765	0.97825	0.999997	1437	2	0.15149	0.26466	0.58511	0.852558	811	7	0.15149
NonTargeting_Human_0241	1	0.92779	0.92785	0.999997	1438	0	0.85866	0.072208	0.072836	0.489664	342	1	0.85866
NonTargeting_Human_0096	1	0.92845	0.92847	0.999997	1439	0	1.0244	0.071552	0.072203	0.489449	341	1	1.0244
NonTargeting_Human_0512	1	0.92861	0.92863	0.999997	1440	0	0.99548	0.071388	0.072062	0.489449	339	1	0.99548
NonTargeting_Human_0856	1	0.92869	0.9287	0.999997	1441	0	1.1604	0.071306	0.071971	0.489449	338	1	1.1604
NonTargeting_Human_0138	1	0.92894	0.92892	0.999997	1442	0	0.80381	0.07106	0.071717	0.489449	337	1	0.80381
METTL17	15	0.92943	0.97854	0.999997	1443	1	0.1878	0.38449	0.70416	0.92678	1044	6	0.1878
NonTargeting_Human_0991	1	0.92951	0.92958	0.999997	1444	0	0.69927	0.070485	0.071152	0.489449	335	1	0.69927
PDHX	15	0.92974	0.97862	0.999997	1445	2	0.46594	0.0073187	0.043308	0.420737	103	8	0.46594
NonTargeting_Human_0792	1	0.92984	0.92984	0.999997	1446	0	0.91317	0.070157	0.070717	0.489449	333	1	0.91317
SLAMF6	15	0.93014	0.97869	0.999997	1447	2	0.34419	0.050069	0.19914	0.644891	264	9	0.34419
NonTargeting_Human_0336	1	0.93017	0.93014	0.999997	1448	0	1.1567	0.069829	0.070389	0.489372	332	1	1.1567
NonTargeting_Human_0106	1	0.93025	0.93019	0.999997	1449	0	0.7506	0.069747	0.070321	0.489372	331	1	0.7506
NonTargeting_Human_0579	1	0.93058	0.93056	0.999997	1450	0	0.86363	0.069419	0.069965	0.489372	330	1	0.86363
NonTargeting_Human_0575	1	0.93107	0.93102	0.999997	1451	0	0.85822	0.068927	0.06944	0.488588	328	1	0.85822
NonTargeting_Human_0212	1	0.93173	0.93169	0.999997	1452	0	1.1895	0.068271	0.068762	0.485927	326	1	1.1895
TMEM253	15	0.93238	0.97913	0.999997	1453	2	0.29509	0.019237	0.09704	0.537639	153	8	0.29509
NonTargeting_Human_0324	1	0.93271	0.93265	0.999997	1454	0	1.2152	0.067287	0.067886	0.483478	324	1	1.2152
NonTargeting_Human_0339	1	0.93288	0.9328	0.999997	1455	0	0.83109	0.067123	0.067818	0.483478	323	1	0.83109
NonTargeting_Human_0327	1	0.9332	0.9331	0.999997	1456	0	0.91387	0.066795	0.067535	0.483478	321	1	0.91387
NonTargeting_Human_0377	1	0.93329	0.93319	0.999997	1457	0	0.95192	0.066713	0.067456	0.483478	320	1	0.95192
NonTargeting_Human_0964	1	0.93337	0.93327	0.999997	1458	0	1.4188	0.066631	0.067337	0.483478	319	1	1.4188
NXF2	14	0.93395	0.97577	0.999997	1459	2	0.13154	0.3636	0.68068	0.91806	1010	6	0.13154
NonTargeting_Human_0044	1	0.93411	0.93397	0.999997	1460	0	0.68178	0.065893	0.066546	0.483478	315	1	0.68178
NonTargeting_Human_0968	1	0.93443	0.93421	0.999997	1461	0	0.84599	0.065565	0.066145	0.483478	314	1	0.84599
DGKK	15	0.93549	0.97968	0.999997	1462	2	0.33894	0.052555	0.20697	0.6507	272	7	0.33894
NonTargeting_Human_0613	1	0.93558	0.93532	0.999997	1463	0	1.3886	0.064417	0.065015	0.478596	313	1	1.3886
BAGE2	15	0.93568	0.97969	0.999997	1464	2	0.15715	0.20499	0.50434	0.803115	685	7	0.15715
NonTargeting_Human_0939	1	0.93608	0.93584	0.999997	1465	0	1.4698	0.063925	0.064512	0.477148	312	1	1.4698
NonTargeting_Human_0580	1	0.93616	0.93591	0.999997	1466	0	0.98045	0.063843	0.064382	0.477148	311	1	0.98045
NonTargeting_Human_0660	1	0.93632	0.93609	0.999997	1467	0	1.0701	0.063679	0.064218	0.477148	310	1	1.0701
TBX1	15	0.93659	0.97988	0.999997	1468	2	0.39535	0.007504	0.044224	0.423853	104	9	0.39535
NonTargeting_Human_0818	1	0.93698	0.9367	0.999997	1469	0	0.89644	0.063023	0.063483	0.477148	309	1	0.89644
NonTargeting_Human_0126	1	0.93731	0.93708	0.999997	1470	0	0.92535	0.062695	0.063195	0.477148	308	1	0.92535
NonTargeting_Human_0779	1	0.93755	0.93727	0.999997	1471	0	1.1008	0.062449	0.062952	0.477148	307	1	1.1008
ASB16	15	0.93849	0.98031	0.999997	1472	2	0.45206	0.04363	0.17994	0.627993	244	9	0.45206
NonTargeting_Human_0463	1	0.93903	0.93874	0.999997	1473	0	0.98506	0.060973	0.061573	0.475226	303	1	0.98506
NonTargeting_Human_0774	1	0.93911	0.93881	0.999997	1474	0	1.0003	0.060891	0.061455	0.475226	302	1	1.0003
ARL8A	15	0.93956	0.98051	0.999997	1475	1	0.38118	0.0022862	0.015759	0.306097	72	11	0.38118
NonTargeting_Human_0117	1	0.94018	0.93985	0.999997	1476	0	0.8951	0.059825	0.06046	0.470781	300	1	0.8951
NonTargeting_Human_0759	1	0.94116	0.94089	0.999997	1477	0	0.79011	0.05884	0.059375	0.464396	299	1	0.79011
CREB5	15	0.9419	0.9809	0.999997	1478	2	0.31184	0.056867	0.22031	0.652688	293	7	0.31184
NonTargeting_Human_0070	1	0.94239	0.94217	0.999997	1479	0	0.86291	0.05761	0.05816	0.456933	298	1	0.86291
NonTargeting_Human_0262	1	0.94247	0.94224	0.999997	1480	0	0.74196	0.057528	0.058109	0.456933	297	1	0.74196
NonTargeting_Human_0931	1	0.94305	0.94274	0.999997	1481	0	0.98629	0.056954	0.057493	0.455782	295	1	0.98629
SERPINB5	15	0.94306	0.98113	0.999997	1482	2	0.41218	0.0033508	0.022297	0.333883	85	11	0.41218
NonTargeting_Human_0591	1	0.94321	0.94287	0.999997	1483	0	1.2546	0.05679	0.057273	0.455782	292	1	1.2546
NonTargeting_Human_0496	1	0.94419	0.94387	0.999997	1484	0	1.7124	0.055806	0.056295	0.450359	288	1	1.7124
NonTargeting_Human_0485	1	0.9446	0.94428	0.999997	1485	0	1.2184	0.055396	0.05586	0.448928	285	1	1.2184
SPINT1	15	0.94508	0.9815	0.999997	1486	2	0.18953	0.15962	0.43734	0.775469	570	7	0.18953
NonTargeting_Human_0179	1	0.94518	0.94484	0.999997	1487	0	1.365	0.054822	0.055289	0.446389	282	1	1.365
NonTargeting_Human_0677	1	0.94526	0.94493	0.999997	1488	0	1.4685	0.05474	0.05521	0.446389	281	1	1.4685
NonTargeting_Human_0649	1	0.94534	0.94502	0.999997	1489	0	0.96875	0.054658	0.055074	0.446389	280	1	0.96875
ISG20	15	0.94537	0.98152	0.999997	1490	2	0.38699	0.017353	0.089502	0.527969	144	9	0.38699
TMEM67	15	0.94552	0.98155	0.999997	1491	2	-0.11292	0.39936	0.71741	0.935467	1064	5	-0.11292
NonTargeting_Human_0884	1	0.94559	0.94522	0.999997	1492	0	1.0804	0.054412	0.054797	0.446389	279	1	1.0804
NonTargeting_Human_0400	1	0.94567	0.94527	0.999997	1493	0	0.89172	0.05433	0.054713	0.446389	276	1	0.89172
hsa-mir-6817	13	0.94598	0.97688	0.999997	1494	2	0.18694	0.54023	0.81174	0.992438	1276	5	0.18694
SREBF2	15	0.94618	0.98166	0.999997	1495	2	0.43164	0.00043651	0.0038005	0.139748	46	11	0.43164
RNF112	15	0.94643	0.98169	0.999997	1496	2	0.45512	0.0051915	0.032548	0.373505	95	9	0.45512
NonTargeting_Human_0837	1	0.94715	0.94684	0.999997	1497	0	1.1467	0.052854	0.053396	0.443363	274	1	1.1467
NonTargeting_Human_0334	1	0.94731	0.94699	0.999997	1498	0	1.0527	0.05269	0.053232	0.443363	273	1	1.0527
SYTL3	15	0.94777	0.98202	0.999997	1499	1	0.060983	0.3183	0.6447	0.892235	926	4	0.060983
NonTargeting_Human_0134	1	0.94797	0.94763	0.999997	1500	0	0.80328	0.052034	0.052661	0.443363	271	1	0.80328
NonTargeting_Human_0587	1	0.94862	0.94829	0.999997	1501	0	0.80887	0.051378	0.05204	0.443225	270	1	0.80887
FAM126A	14	0.94903	0.97999	0.999997	1502	2	0.27353	0.11477	0.3498	0.726983	450	7	0.27353
NonTargeting_Human_0139	1	0.94911	0.94879	0.999997	1503	0	1.2129	0.050886	0.051576	0.442948	269	1	1.2129
AKAP9	15	0.94916	0.98242	0.999997	1504	1	0.40321	0.0076044	0.044732	0.423853	105	10	0.40321
NonTargeting_Human_0317	1	0.94961	0.94931	0.999997	1505	0	0.86008	0.050394	0.051056	0.440643	267	1	0.86008
NonTargeting_Human_0541	1	0.94969	0.94939	0.999997	1506	0	0.99656	0.050312	0.051005	0.440643	266	1	0.99656
NonTargeting_Human_0691	1	0.94985	0.94955	0.999997	1507	0	1.0317	0.050148	0.050881	0.440643	265	1	1.0317
NonTargeting_Human_0977	1	0.9501	0.94985	0.999997	1508	0	0.94624	0.049902	0.050683	0.440643	262	1	0.94624
NonTargeting_Human_0460	1	0.95018	0.94994	0.999997	1509	0	1.3042	0.04982	0.05061	0.440643	260	1	1.3042
NonTargeting_Human_0920	1	0.95067	0.95039	0.999997	1510	0	1.2174	0.049328	0.050056	0.440643	259	1	1.2174
NonTargeting_Human_0623	1	0.95116	0.95088	0.999997	1511	0	0.91581	0.048835	0.049496	0.440643	257	1	0.91581
NonTargeting_Human_0982	1	0.95182	0.95157	0.999997	1512	0	1.7173	0.048179	0.048756	0.438055	256	1	1.7173
SNX19	15	0.95191	0.9831	0.999997	1513	2	0.31722	0.056889	0.22035	0.652688	294	8	0.31722
NonTargeting_Human_0903	1	0.95198	0.95171	0.999997	1514	0	1.24	0.048015	0.048564	0.438055	255	1	1.24
CHRNA3	15	0.9532	0.98346	0.999997	1515	1	0.24819	0.18377	0.47405	0.788562	634	7	0.24819
NonTargeting_Human_0161	1	0.95346	0.95307	0.999997	1516	0	0.82938	0.046539	0.046976	0.428656	254	1	0.82938
NonTargeting_Human_0348	1	0.95412	0.95379	0.999997	1517	0	0.99779	0.045883	0.046343	0.427332	253	1	0.99779
ZNF764	15	0.95454	0.98374	0.999997	1518	2	0.11808	0.17247	0.45711	0.778761	609	7	0.11808
NonTargeting_Human_0089	1	0.95469	0.95434	0.999997	1519	0	0.78587	0.045309	0.045812	0.424669	250	1	0.78587
NonTargeting_Human_0286	1	0.95494	0.95456	0.999997	1520	0	0.9842	0.045063	0.045563	0.424669	249	1	0.9842
HAPLN1	15	0.95547	0.98402	0.999997	1521	2	0.25189	0.15815	0.43501	0.77468	565	6	0.25189
NonTargeting_Human_0589	1	0.95567	0.95526	0.999997	1522	0	1.0212	0.044325	0.044823	0.423853	247	1	1.0212
hsa-mir-1302-6	7	0.95585	0.95602	0.999997	1523	0	0.67283	0.0065977	0.030045	0.359175	101	5	0.67283
NonTargeting_Human_0635	1	0.95608	0.95578	0.999997	1524	0	2.1733	0.043915	0.044348	0.423853	245	1	2.1733
NonTargeting_Human_0236	1	0.95699	0.95679	0.999997	1525	0	1.5429	0.043013	0.043467	0.420737	241	1	1.5429
NonTargeting_Human_0712	1	0.95707	0.95687	0.999997	1526	0	1.0107	0.042931	0.043399	0.420737	240	1	1.0107
KLHDC7B	15	0.9572	0.9845	0.999997	1527	1	0.24036	0.07938	0.2746	0.693233	356	8	0.24036
NonTargeting_Human_0912	1	0.95723	0.95702	0.999997	1528	0	1.1286	0.042767	0.043195	0.420737	239	1	1.1286
NonTargeting_Human_0349	1	0.95764	0.95739	0.999997	1529	0	0.99703	0.042357	0.042743	0.420737	236	1	0.99703
NonTargeting_Human_0171	1	0.95781	0.95757	0.999997	1530	0	1.0007	0.042193	0.042528	0.420737	234	1	1.0007
NonTargeting_Human_0605	1	0.95814	0.95791	0.999997	1531	0	1.1537	0.041865	0.042229	0.420737	233	1	1.1537
NonTargeting_Human_0149	1	0.95863	0.9584	0.999997	1532	0	1.0062	0.041373	0.041766	0.420536	232	1	1.0062
NonTargeting_Human_0686	1	0.95887	0.9586	0.999997	1533	0	1.0495	0.041127	0.041415	0.419419	231	1	1.0495
NonTargeting_Human_0066	1	0.95994	0.95972	0.999997	1534	0	0.8931	0.040061	0.040347	0.410977	230	1	0.8931
NonTargeting_Human_0412	1	0.9601	0.95988	0.999997	1535	0	0.93001	0.039897	0.040172	0.410977	229	1	0.93001
NonTargeting_Human_0071	1	0.96019	0.95992	0.999997	1536	0	1.0569	0.039815	0.040104	0.410977	228	1	1.0569
NonTargeting_Human_0315	1	0.96043	0.96022	0.999997	1537	0	1.0347	0.039569	0.039889	0.410977	227	1	1.0347
NonTargeting_Human_0602	1	0.96051	0.96034	0.999997	1538	0	0.954	0.039487	0.039799	0.410977	226	1	0.954
GPR52	15	0.96057	0.98542	0.999997	1539	1	0.25729	0.14822	0.41925	0.766722	544	6	0.25729
NonTargeting_Human_0076	1	0.96109	0.96101	0.999997	1540	0	1.1274	0.038913	0.039223	0.410977	225	1	1.1274
NonTargeting_Human_0263	1	0.96133	0.96131	0.999997	1541	0	0.97472	0.038667	0.038963	0.410977	223	1	0.97472
NonTargeting_Human_0305	1	0.96142	0.96139	0.999997	1542	0	1.3177	0.038585	0.038889	0.410977	222	1	1.3177
RPL41	7	0.9617	0.96189	0.999997	1543	0	0.89894	0.0038826	0.018731	0.311116	87	5	0.89894
NonTargeting_Human_0842	1	0.96174	0.96173	0.999997	1544	0	0.98697	0.038257	0.038629	0.410977	221	1	0.98697
NonTargeting_Human_0692	1	0.96232	0.96228	0.999997	1545	0	1.2046	0.037682	0.037996	0.408401	219	1	1.2046
TNFAIP3	15	0.96291	0.98604	0.999997	1546	1	0.34006	0.0095691	0.054204	0.446389	115	8	0.34006
MDH1	15	0.96331	0.98617	0.999997	1547	1	0.46404	0.0028235	0.019138	0.311116	80	10	0.46404
PGA3	15	0.96359	0.98624	0.999997	1548	2	0.052958	0.50252	0.80031	0.988818	1228	4	0.052958
NonTargeting_Human_0520	1	0.96379	0.96377	0.999997	1549	0	1.098	0.036206	0.036306	0.396501	218	1	1.098
ROR1	15	0.96381	0.9863	0.999997	1550	1	0.4648	0.0041005	0.026852	0.355501	89	11	0.4648
EML4	15	0.96399	0.98636	0.999997	1551	2	0.22956	0.13733	0.40007	0.75891	513	7	0.22956
NonTargeting_Human_0424	1	0.96453	0.96448	0.999997	1552	0	1.2823	0.035468	0.035645	0.39277	216	1	1.2823
NonTargeting_Human_0150	1	0.96535	0.96528	0.999997	1553	0	1.0283	0.034648	0.034747	0.387747	215	1	1.0283
NonTargeting_Human_0750	1	0.96552	0.96541	0.999997	1554	0	1.4014	0.034484	0.034555	0.387747	213	1	1.4014
NonTargeting_Human_0626	1	0.9656	0.96549	0.999997	1555	0	1.111	0.034402	0.034492	0.387747	211	1	1.111
VOPP1	14	0.96563	0.98581	0.999997	1556	2	0.35819	0.017252	0.084715	0.526455	143	9	0.35819
TADA2A	15	0.96665	0.98726	0.999997	1557	1	0.45717	0.0091643	0.05226	0.443225	112	10	0.45717
DNAJC18	15	0.9668	0.9873	0.999997	1558	2	0.3592	0.13969	0.40463	0.761456	518	8	0.3592
NonTargeting_Human_0723	1	0.9674	0.96743	0.999997	1559	0	1.4174	0.032598	0.032831	0.373505	207	1	1.4174
NonTargeting_Human_0363	1	0.96748	0.96753	0.999997	1560	0	1.3067	0.032516	0.032701	0.373505	206	1	1.3067
NonTargeting_Human_0831	1	0.96839	0.96828	0.999997	1561	0	1.3802	0.031614	0.031735	0.368205	203	1	1.3802
NonTargeting_Human_0449	1	0.96945	0.96929	0.999997	1562	0	1.0797	0.030548	0.030751	0.359175	199	1	1.0797
NonTargeting_Human_0471	1	0.96962	0.96949	0.999997	1563	0	0.96924	0.030384	0.030621	0.359175	198	1	0.96924
FAM134C	15	0.9697	0.98825	0.999997	1564	1	0.73389	7.305e-05	0.00070923	0.039454	31	9	0.73389
NID1	15	0.96975	0.98827	0.999997	1565	1	0.34532	0.024187	0.11483	0.578526	170	9	0.34532
NonTargeting_Human_0897	1	0.96994	0.96986	0.999997	1566	0	1.1199	0.030056	0.030294	0.359175	195	1	1.1199
NonTargeting_Human_0170	1	0.9706	0.9705	0.999997	1567	0	1.314	0.0294	0.02957	0.357289	193	1	1.314
NonTargeting_Human_0486	1	0.97093	0.97083	0.999997	1568	0	1.2246	0.029072	0.029254	0.35592	192	1	1.2246
NonTargeting_Human_0320	1	0.97109	0.97098	0.999997	1569	0	1.4752	0.028908	0.029016	0.355501	190	1	1.4752
CDC14A	15	0.97121	0.9887	0.999997	1570	2	0.3213	0.08125	0.27882	0.694111	360	7	0.3213
NonTargeting_Human_0052	1	0.9715	0.9714	0.999997	1571	0	1.1063	0.028498	0.028655	0.355501	188	1	1.1063
MRPL42	15	0.9715	0.98883	0.999997	1572	2	0.1974	0.28303	0.60916	0.865574	850	5	0.1974
NonTargeting_Human_0396	1	0.97167	0.97153	0.999997	1573	0	0.90042	0.028334	0.028536	0.355501	187	1	0.90042
TSPAN11	15	0.97175	0.98894	0.999997	1574	2	0.45912	0.0020966	0.014583	0.306097	69	11	0.45912
NonTargeting_Human_0362	1	0.97191	0.97179	0.999997	1575	0	1.8834	0.028088	0.028327	0.355501	186	1	1.8834
NonTargeting_Human_0201	1	0.97208	0.97197	0.999997	1576	0	0.97214	0.027924	0.028146	0.355501	185	1	0.97214
CSNK2A2	15	0.97208	0.98907	0.999997	1577	2	0.059858	0.54884	0.82593	0.999997	1286	5	0.059858
NonTargeting_Human_0228	1	0.97273	0.97255	0.999997	1578	0	1.0453	0.027268	0.027462	0.355501	183	1	1.0453
ZNF548	15	0.97275	0.98933	0.999997	1579	2	0.59973	0.00062378	0.0052415	0.163985	55	11	0.59973
NonTargeting_Human_0685	1	0.97314	0.97289	0.999997	1580	0	1.8289	0.026857	0.027004	0.355501	182	1	1.8289
NonTargeting_Human_0627	1	0.97331	0.97307	0.999997	1581	0	1.1832	0.026693	0.026886	0.355501	180	1	1.1832
BMP15	15	0.97335	0.98955	0.999997	1582	2	0.16256	0.46228	0.77004	0.968488	1171	6	0.16256
TRIM4	15	0.97342	0.98959	0.999997	1583	1	0.29723	0.054407	0.2125	0.6507	278	9	0.29723
NonTargeting_Human_0107	1	0.97372	0.97345	0.999997	1584	0	0.93	0.026283	0.026507	0.355501	178	1	0.93
FAM219B	15	0.97379	0.98968	0.999997	1585	1	0.13967	0.038763	0.16438	0.61804	224	5	0.13967
NonTargeting_Human_0218	1	0.9738	0.97355	0.999997	1586	0	1.1316	0.026201	0.026422	0.355501	177	1	1.1316
SLC26A4	15	0.97424	0.98982	0.999997	1587	1	0.374	0.077813	0.27081	0.691749	352	8	0.374
NonTargeting_Human_0251	1	0.97486	0.97456	0.999997	1588	0	0.99261	0.025135	0.025292	0.348912	174	1	0.99261
NFRKB	15	0.97495	0.99014	0.999997	1589	2	0.30026	0.22471	0.53164	0.821176	727	7	0.30026
NonTargeting_Human_0081	1	0.97519	0.97489	0.999997	1590	0	1.4561	0.024807	0.024936	0.346731	173	1	1.4561
NonTargeting_Human_0031	1	0.97544	0.97518	0.999997	1591	0	1.3076	0.024561	0.024659	0.346731	172	1	1.3076
NonTargeting_Human_0457	1	0.97568	0.9754	0.999997	1592	0	1.4414	0.024315	0.024461	0.346731	171	1	1.4414
NonTargeting_Human_0682	1	0.97601	0.97574	0.999997	1593	0	1.3806	0.023987	0.02419	0.346731	169	1	1.3806
NonTargeting_Human_0356	1	0.97609	0.97584	0.999997	1594	0	1.462	0.023905	0.024094	0.346731	168	1	1.462
NonTargeting_Human_0335	1	0.97659	0.97637	0.999997	1595	0	1.2503	0.023413	0.023653	0.345338	165	1	1.2503
hsa-mir-1908	15	0.97711	0.99093	0.999997	1596	2	0.28625	0.033944	0.14847	0.60978	209	8	0.28625
DCAF4	15	0.97773	0.99112	0.999997	1597	2	0.39787	0.017716	0.091118	0.530361	146	9	0.39787
NonTargeting_Human_0867	1	0.97773	0.97758	0.999997	1598	0	1.3927	0.022265	0.02254	0.334662	162	1	1.3927
NonTargeting_Human_0848	1	0.97798	0.97783	0.999997	1599	0	1.3853	0.022019	0.022291	0.333883	161	1	1.3853
RPUSD4	15	0.97806	0.99125	0.999997	1600	2	0.026863	0.28842	0.61572	0.871363	863	3	0.026863
METAP1D	15	0.97821	0.99128	0.999997	1601	1	0.40836	0.0025409	0.017426	0.306097	78	9	0.40836
ISG15	15	0.97842	0.99136	0.999997	1602	2	0.30798	0.11265	0.34877	0.726541	442	8	0.30798
NARF	15	0.97858	0.99143	0.999997	1603	2	0.35505	0.087312	0.29274	0.694954	383	8	0.35505
SORT1	15	0.9788	0.99154	0.999997	1604	2	0.15908	0.2948	0.62259	0.873208	880	6	0.15908
HIST1H2BF	15	0.97893	0.9916	0.999997	1605	1	0.84833	9.2065e-06	7.6292e-05	0.007426	18	13	0.84833
NonTargeting_Human_0092	1	0.97929	0.97912	0.999997	1606	0	1.434	0.020707	0.020929	0.318855	160	1	1.434
PGM1	15	0.97942	0.99178	0.999997	1607	1	0.37306	0.0023371	0.016137	0.306097	73	11	0.37306
JAK1	15	0.97943	0.99179	0.999997	1608	2	0.32936	0.042431	0.17624	0.625596	237	8	0.32936
AGPAT1	15	0.97946	0.9918	0.999997	1609	2	0.28731	0.12059	0.36527	0.73557	470	7	0.28731
PRDM8	15	0.98007	0.99211	0.999997	1610	1	0.3442	0.03027	0.13597	0.597025	197	7	0.3442
LYZ	15	0.9801	0.99215	0.999997	1611	1	0.48819	0.000775	0.0064	0.193069	56	12	0.48819
DNAJC4	15	0.98013	0.99217	0.999997	1612	2	0.48687	0.023818	0.11349	0.577985	167	9	0.48687
NonTargeting_Human_0158	1	0.9802	0.97995	0.999997	1613	0	1.0769	0.019805	0.020133	0.314597	158	1	1.0769
NonTargeting_Human_0260	1	0.98052	0.98031	0.999997	1614	0	1.2122	0.019477	0.019737	0.311524	156	1	1.2122
UBE2Q1	15	0.98052	0.99234	0.999997	1615	2	0.092976	0.35905	0.68185	0.918429	1003	6	0.092976
NonTargeting_Human_0144	1	0.98069	0.98047	0.999997	1616	0	1.466	0.019313	0.019534	0.311116	154	1	1.466
INPP5J	15	0.98102	0.99251	0.999997	1617	2	0.29626	0.095643	0.31173	0.706365	408	8	0.29626
NonTargeting_Human_0261	1	0.98126	0.9811	0.999997	1618	0	1.2563	0.018739	0.018872	0.311116	152	1	1.2563
NonTargeting_Human_0017	1	0.98134	0.98124	0.999997	1619	0	1.0276	0.018657	0.01881	0.311116	151	1	1.0276
DDX4	15	0.98139	0.99263	0.999997	1620	2	0.15433	0.29821	0.6259	0.874465	888	4	0.15433
NonTargeting_Human_0872	1	0.98167	0.98162	0.999997	1621	0	1.1929	0.018329	0.018415	0.311116	149	1	1.1929
NonTargeting_Human_0679	1	0.98192	0.98188	0.999997	1622	0	1.5003	0.018083	0.018155	0.311116	148	1	1.5003
NonTargeting_Human_0952	1	0.98257	0.9826	0.999997	1623	0	0.82202	0.017427	0.017601	0.306097	145	1	0.82202
NonTargeting_Human_0192	1	0.98282	0.98288	0.999997	1624	0	1.3322	0.017181	0.017341	0.306097	142	1	1.3322
NonTargeting_Human_0122	1	0.98298	0.98307	0.999997	1625	0	0.83079	0.017017	0.017137	0.306097	141	1	0.83079
NonTargeting_Human_0367	1	0.98307	0.98317	0.999997	1626	0	1.2962	0.016935	0.01707	0.306097	140	1	1.2962
CPM	15	0.98308	0.99302	0.999997	1627	1	0.40169	0.0043394	0.028361	0.355501	91	11	0.40169
NonTargeting_Human_0340	1	0.98331	0.98344	0.999997	1628	0	1.3029	0.016689	0.016832	0.306097	138	1	1.3029
NonTargeting_Human_0078	1	0.98364	0.98382	0.999997	1629	0	1.7353	0.016361	0.016448	0.306097	137	1	1.7353
NonTargeting_Human_0860	1	0.98413	0.98431	0.999997	1630	0	1.3969	0.015868	0.015922	0.306097	136	1	1.3969
NonTargeting_Human_0648	1	0.98421	0.98439	0.999997	1631	0	1.1807	0.015786	0.015832	0.306097	135	1	1.1807
NonTargeting_Human_0043	1	0.98446	0.98472	0.999997	1632	0	1.0125	0.01554	0.015493	0.306097	134	1	1.0125
NonTargeting_Human_0678	1	0.98479	0.98501	0.999997	1633	0	1.5875	0.015212	0.015143	0.306097	133	1	1.5875
NonTargeting_Human_0080	1	0.98503	0.98522	0.999997	1634	0	1.7712	0.014966	0.014883	0.306097	132	1	1.7712
NonTargeting_Human_0713	1	0.98528	0.98545	0.999997	1635	0	1.325	0.01472	0.014659	0.306097	130	1	1.325
BMI1	15	0.98528	0.99337	0.999997	1636	1	0.43035	0.043501	0.17954	0.627993	243	9	0.43035
NonTargeting_Human_0213	1	0.98536	0.98552	0.999997	1637	0	1.2135	0.014638	0.014589	0.306097	129	1	1.2135
NonTargeting_Human_0104	1	0.98544	0.98558	0.999997	1638	0	1.3246	0.014556	0.014504	0.306097	128	1	1.3246
IREB2	15	0.9855	0.9934	0.999997	1639	1	0.72207	0.00029074	0.0025515	0.105802	41	9	0.72207
NonTargeting_Human_0746	1	0.98602	0.98616	0.999997	1640	0	1.5051	0.013982	0.013911	0.306097	127	1	1.5051
C2CD4A	15	0.98621	0.9935	0.999997	1641	1	0.33363	0.029032	0.1318	0.594658	191	9	0.33363
OR56A1	15	0.98644	0.99356	0.999997	1642	1	0.42554	0.011645	0.063947	0.477148	120	10	0.42554
MRPS31	15	0.98653	0.99357	0.999997	1643	1	0.54139	0.0044734	0.028988	0.355501	92	9	0.54139
PITPNM2	15	0.98657	0.99357	0.999997	1644	1	0.23843	0.12642	0.3776	0.742957	487	8	0.23843
NonTargeting_Human_0301	1	0.987	0.98713	0.999997	1645	0	2.6615	0.012998	0.01295	0.306097	125	1	2.6615
NonTargeting_Human_0711	1	0.98758	0.98775	0.999997	1646	0	1.3742	0.012424	0.012413	0.306097	123	1	1.3742
NXF5	15	0.98763	0.99376	0.999997	1647	1	0.72428	6.1158e-05	0.0005849	0.035336	29	11	0.72428
TAOK1	15	0.98821	0.99387	0.999997	1648	1	0.58765	0.0023762	0.016369	0.306097	75	9	0.58765
RAB28	15	0.98852	0.99391	0.999997	1649	1	0.21582	0.17392	0.45918	0.779729	614	7	0.21582
NonTargeting_Human_0253	1	0.98897	0.9892	0.999997	1650	0	2.2866	0.01103	0.010949	0.286316	117	1	2.2866
RAB5C	15	0.98933	0.99409	0.999997	1651	1	0.26023	0.032133	0.14245	0.605326	205	8	0.26023
ABCG5	15	0.98964	0.99417	0.999997	1652	1	0.55947	7.6878e-05	0.00074314	0.039454	33	12	0.55947
NonTargeting_Human_0733	1	0.98971	0.9899	0.999997	1653	0	1.6623	0.010292	0.010232	0.275781	116	1	1.6623
GPBP1L1	15	0.99016	0.99434	0.999997	1654	1	0.22139	0.15499	0.4301	0.772171	557	6	0.22139
MLLT1	15	0.99134	0.99467	0.999997	1655	1	0.62643	0.0059887	0.036719	0.397109	100	10	0.62643
ELF4	15	0.99163	0.99476	0.999997	1656	1	0.65141	0.00097221	0.0077337	0.225825	57	11	0.65141
NonTargeting_Human_0465	1	0.99184	0.99199	0.999997	1657	0	1.6554	0.0081598	0.0080333	0.230198	109	1	1.6554
SIRT5	15	0.99325	0.99531	0.999997	1658	1	0.43226	0.0025785	0.017646	0.306097	79	11	0.43226
GYG2	15	0.99334	0.99532	0.999997	1659	1	0.39162	0.0076647	0.044998	0.423853	106	10	0.39162
NonTargeting_Human_0127	1	0.9934	0.99355	0.999997	1660	0	1.7511	0.0066016	0.0065018	0.193069	102	1	1.7511
ZDHHC5	15	0.99347	0.99537	0.999997	1661	1	0.18012	0.090817	0.30101	0.702144	393	6	0.18012
IBA57	15	0.99387	0.99544	0.999997	1662	1	0.41376	1.8707e-05	0.00017801	0.01356	23	13	0.41376
IRS2	15	0.99393	0.9955	0.999997	1663	1	0.30268	0.049279	0.1969	0.644035	258	9	0.30268
EPHA2	15	0.99407	0.99553	0.999997	1664	1	0.8288	7.5557e-08	2.8256e-06	0.000413	11	11	0.8288
NonTargeting_Human_0599	1	0.99438	0.99462	0.999997	1665	0	1.8111	0.0056175	0.0056315	0.173094	97	1	1.8111
LACRT	15	0.99449	0.99567	0.999997	1666	1	0.32399	0.042483	0.1764	0.625596	238	9	0.32399
KRTAP13-2	15	0.99498	0.99584	0.999997	1667	1	0.33614	0.05054	0.20067	0.646584	268	8	0.33614
SERPINA1	15	0.9952	0.99595	0.999997	1668	1	0.3949	0.030231	0.13584	0.597025	196	9	0.3949
ZBTB44	15	0.99566	0.99615	0.999997	1669	1	0.14806	0.097138	0.3152	0.706365	415	7	0.14806
PACRGL	15	0.99568	0.99615	0.999997	1670	1	0.60763	0.000488	0.0041848	0.146634	49	12	0.60763
PTCHD4	15	0.99571	0.99616	0.999997	1671	1	0.47885	0.0078046	0.045772	0.424669	107	9	0.47885
FBXL8	15	0.99572	0.99616	0.999997	1672	1	0.50782	0.0025179	0.017301	0.306097	76	11	0.50782
TSPYL4	15	0.99579	0.99621	0.999997	1673	1	0.27064	0.075249	0.26478	0.685961	351	8	0.27064
PGAP3	15	0.99629	0.99654	0.999997	1674	1	0.3837	0.025578	0.11987	0.578526	175	8	0.3837
SPATA25	15	0.99652	0.99669	0.999997	1675	1	0.14249	0.36995	0.6916	0.921428	1021	5	0.14249
FAM104A	15	0.9969	0.99694	0.999997	1676	1	0.33856	0.022528	0.10894	0.56975	164	8	0.33856
CLEC12B	15	0.99693	0.99697	0.999997	1677	1	0.4047	0.020102	0.10041	0.543714	159	9	0.4047
KDM3B	15	0.99704	0.99708	0.999997	1678	1	0.86065	5.2775e-05	0.00050579	0.031648	28	11	0.86065
hsa-mir-1976	12	0.99709	0.99696	0.999997	1679	0	0.33676	0.070192	0.23803	0.670458	334	7	0.33676
GALR1	15	0.99711	0.9971	0.999997	1680	1	0.13202	0.11038	0.34385	0.722327	437	7	0.13202
C6orf62	15	0.9972	0.99719	0.999997	1681	1	0.69779	0.0016481	0.011842	0.305111	63	11	0.69779
CDH1	15	0.99723	0.9972	0.999997	1682	1	0.67484	0.00044187	0.0038287	0.139748	47	10	0.67484
CTRL	15	0.99726	0.99721	0.999997	1683	1	0.45869	0.002884	0.0195	0.311116	82	8	0.45869
EPB41	15	0.99743	0.99734	0.999997	1684	1	0.4813	0.0018436	0.013182	0.306097	65	10	0.4813
CAB39	15	0.99745	0.99734	0.999997	1685	1	1.0346	5.2141e-07	8.4769e-06	0.001061	13	13	1.0346
ZFP3	15	0.99753	0.99737	0.999997	1686	1	0.11994	0.38272	0.70274	0.926759	1039	6	0.11994
MRPS16	15	0.99756	0.99741	0.999997	1687	1	0.13349	0.28161	0.60707	0.864004	848	5	0.13349
RAB23	15	0.99757	0.99741	0.999997	1688	1	0.35516	0.091298	0.30208	0.702144	395	8	0.35516
MTFP1	15	0.99758	0.99742	0.999997	1689	1	0.28547	0.026174	0.12193	0.5793	176	9	0.28547
C12orf43	15	0.99761	0.99743	0.999997	1690	1	0.23213	0.031467	0.14011	0.604794	201	8	0.23213
ANKRD36	15	0.99765	0.99748	0.999997	1691	1	0.57488	0.026393	0.12263	0.5793	179	9	0.57488
AGPAT6	15	0.99768	0.9975	0.999997	1692	1	0.76395	1.8258e-06	1.4128e-05	0.00165	15	14	0.76395
RALGAPA1	15	0.99773	0.99755	0.999997	1693	1	0.31481	0.029795	0.13426	0.597025	194	9	0.31481
TFAM	15	0.99781	0.99761	0.999997	1694	1	0.29422	0.12307	0.37074	0.738102	479	7	0.29422
PRR3	15	0.99787	0.99765	0.999997	1695	1	0.59081	0.00023742	0.0020655	0.09047	39	11	0.59081
SPI1	15	0.99787	0.99766	0.999997	1696	1	0.49353	0.00029633	0.0025967	0.105802	42	12	0.49353
TREM1	15	0.99791	0.99767	0.999997	1697	1	0.7312	0.00012792	0.0012348	0.06181	35	12	0.7312
DAZ1	15	0.99805	0.99783	0.999997	1698	0	0.30469	0.14259	0.41025	0.762518	529	8	0.30469
CTIF	15	0.99809	0.99786	0.999997	1699	0	0.18148	0.57243	0.83876	0.999997	1311	5	0.18148
OR5AR1	15	0.99818	0.99796	0.999997	1700	0	0.31704	0.071463	0.25585	0.67886	340	8	0.31704
RALGAPB	15	0.99827	0.99808	0.999997	1701	0	0.78959	4.1529e-05	0.00039276	0.025853	26	11	0.78959
TBXAS1	15	0.99833	0.99814	0.999997	1702	0	0.23093	0.17968	0.46788	0.785155	627	5	0.23093
PPM1A	15	0.99838	0.99819	0.999997	1703	0	0.3382	0.013481	0.072356	0.489449	126	10	0.3382
BRICD5	15	0.99845	0.99826	0.999997	1704	0	0.24477	0.078437	0.27232	0.692015	354	8	0.24477
MORC3	15	0.99861	0.99843	0.999997	1705	0	0.23314	0.05617	0.21825	0.6507	290	7	0.23314
NonTargeting_Human_0979	1	0.99865	0.99869	0.999997	1706	0	6.1478	0.0013531	0.0013987	0.06623	61	1	6.1478
LRRC8A	15	0.99898	0.99882	0.999997	1707	0	0.58116	2.4159e-05	0.00022322	0.015644	25	11	0.58116
PIP5K1A	15	0.99899	0.99884	0.999997	1708	0	0.085984	0.28456	0.61094	0.867392	855	5	0.085984
UPP2	15	0.99902	0.99887	0.999997	1709	0	0.35817	0.011204	0.061957	0.476094	118	10	0.35817
RAP1GAP	15	0.99911	0.99896	0.999997	1710	0	0.55195	0.0021045	0.014634	0.306097	70	8	0.55195
FRYL	15	0.99913	0.999	0.999997	1711	0	0.62791	0.0014346	0.010463	0.277753	62	9	0.62791
SMOC1	15	0.99927	0.99915	0.999997	1712	0	0.44337	0.0025255	0.017347	0.306097	77	10	0.44337
SUSD5	15	0.99929	0.99918	0.999997	1713	0	0.79822	8.7998e-05	0.00087312	0.044991	34	12	0.79822
EHD2	15	0.99931	0.99921	0.999997	1714	0	0.44519	0.00037079	0.0031619	0.123102	44	12	0.44519
DCAKD	15	0.99936	0.99927	0.999997	1715	0	0.28767	0.0021534	0.01495	0.306097	71	11	0.28767
ABCB4	15	0.99937	0.99929	0.999997	1716	0	0.41325	0.0082093	0.047722	0.433207	110	10	0.41325
MID1	15	0.9994	0.99932	0.999997	1717	0	0.42444	0.005953	0.036436	0.396501	99	9	0.42444
FAM156A	15	0.9994	0.99932	0.999997	1718	0	0.13617	0.22504	0.53215	0.821176	728	6	0.13617
CAPZA1	15	0.99941	0.99933	0.999997	1719	0	0.56898	9.6724e-06	8.1943e-05	0.007556	19	12	0.56898
OLR1	15	0.99943	0.99936	0.999997	1720	0	0.6187	0.00024942	0.0021503	0.091886	40	11	0.6187
STK40	15	0.99946	0.99943	0.999997	1721	0	0.77082	1.1669e-05	0.00010455	0.009158	20	13	0.77082
NUDT5	15	0.99949	0.99947	0.999997	1722	0	0.49347	0.0020195	0.014137	0.306097	67	10	0.49347
ANXA13	15	0.99953	0.99953	0.999997	1723	0	0.2328	0.037971	0.16169	0.61804	220	8	0.2328
CERS6	15	0.99954	0.99955	0.999997	1724	0	0.63591	0.00054214	0.0045973	0.15793	50	11	0.63591
WWP1	15	0.99961	0.99964	0.999997	1725	0	0.16523	0.10128	0.3243	0.710489	422	6	0.16523
CDT1	15	0.99969	0.99975	0.999997	1726	0	0.32863	0.044407	0.18227	0.629444	248	9	0.32863
DYNLL1	15	0.9997	0.99975	0.999997	1727	0	0.46678	0.003479	0.023071	0.339671	86	11	0.46678
TPP2	15	0.99974	0.99979	0.999997	1728	0	0.32105	0.12029	0.36463	0.73557	468	7	0.32105
SQLE	15	0.99975	0.9998	0.999997	1729	0	2.5114	6.3528e-21	2.8256e-06	0.000413	3	13	2.5114
TMEM30B	15	0.99982	0.99988	0.999997	1730	0	0.34047	0.019402	0.097639	0.537639	155	9	0.34047
RDH14	15	0.99988	0.99991	0.999997	1731	0	0.55385	7.4819e-05	0.00072619	0.039454	32	12	0.55385
SOCS1	15	0.99989	0.99992	0.999997	1732	0	0.41212	0.0047498	0.030418	0.359175	93	10	0.41212
UBE2O	15	0.99991	0.99993	0.999997	1733	0	0.27553	0.1406	0.40648	0.762329	522	8	0.27553
EBP	15	0.99992	0.99994	0.999997	1734	0	0.70769	6.5205e-05	0.00063011	0.036799	30	12	0.70769
CLEC3B	15	0.99995	0.99996	0.999997	1735	0	0.46497	0.00021074	0.001879	0.084412	38	12	0.46497
PDCD10	15	0.99998	0.99999	0.999997	1736	0	1.2925	1.1461e-11	2.8256e-06	0.000413	6	14	1.2925
PDE1A	15	0.99999	1	0.999997	1737	0	0.73553	1.7962e-05	0.00016671	0.013276	22	13	0.73553
MBOAT7	15	0.99999	1	0.999997	1738	0	0.54956	0.00059637	0.0050494	0.163825	53	12	0.54956
PDGFA	15	0.99999	1	0.999997	1739	0	0.46342	0.00058069	0.0049533	0.16374	52	12	0.46342
EGLN2	15	0.99999	1	0.999997	1740	0	0.75214	1.5599e-08	2.8256e-06	0.000413	10	13	0.75214
CARM1	15	1	1	0.999997	1741	0	0.63981	4.1661e-05	0.00039841	0.025853	27	13	0.63981
CUL7	15	1	1	0.999997	1742	0	0.70666	1.7243e-05	0.00016106	0.013276	21	13	0.70666
TGIF1	15	1	1	0.999997	1743	0	1.0636	1.6182e-11	2.8256e-06	0.000413	7	14	1.0636
FAM110D	15	1	1	0.999997	1744	0	0.36531	0.0030095	0.020291	0.314597	83	11	0.36531
OR52B2	15	1	1	0.999997	1745	0	0.63756	5.226e-06	4.8036e-05	0.00495	17	13	0.63756
VHL	15	1	1	0.999997	1746	0	0.45664	1.941e-07	2.8256e-06	0.000413	12	12	0.45664
CHP1	15	1	1	0.999997	1747	0	1.8119	5.8511e-19	2.8256e-06	0.000413	4	15	1.8119
PEX6	15	1	1	0.999997	1748	0	1.2471	8.1692e-11	2.8256e-06	0.000413	8	15	1.2471
IRF2BP2	15	1	1	0.999997	1749	0	1.0018	1.2501e-10	2.8256e-06	0.000413	9	15	1.0018
TFRC	15	1	1	0.999997	1750	0	1.2954	2.5956e-12	2.8256e-06	0.000413	5	15	1.2954
MYLIP	15	1	1	0.999997	1751	0	2.8313	1.8079e-36	2.8256e-06	0.000413	1	15	2.8313
LSS	15	1	1	0.999997	1752	0	2.1042	1.7539e-25	2.8256e-06	0.000413	2	15	2.1042

## Sheet: LP-rich_gRNA
sgrna	Gene	control_count	treatment_count	control_mean	treat_mean	LFC	control_var	adj_var	score	p.low	p.high	p.twosided	FDR	high_in_treatment
LDLR_14	LDLR	13118/12333/6478.3	511.83/252.69/1480.1	12333	511.83	-4.5881	17449000	1138900	11.077	8.0346e-29	1	1.6069e-28	8.5272e-26	FALSE
hsa-mir-6886_6	hsa-mir-6886	10805/10878/4356.3	209.84/624.75/944.35	10805	624.75	-4.1102	20797000	988610	10.239	6.6193e-25	1	1.3239e-24	5.9843e-22	FALSE
LDLR_11	LDLR	7028.3/6534.9/3132.8	0/0/699.59	6534.9	0	-12.674	5908900	577350	8.6005	4.1745e-20	1	8.3491e-20	3.1844e-17	FALSE
LDLR_8	LDLR	6901/7010.9/2937	184.3/100/1197.8	6901	184.3	-5.2191	7862800	612010	8.5858	3.9455e-18	1	7.8911e-18	2.2931e-15	FALSE
LDLR_1	LDLR	7012.6/6938.2/3100	86.673/338.72/378.71	6938.2	338.72	-4.3524	7368600	615530	8.4117	1.974e-17	1	3.9481e-17	1.0708e-14	FALSE
LDLR_13	LDLR	4775.6/4843.7/2489.2	0/0/1224.8	4775.6	0	-12.222	2616100	412810	7.4328	5.7394e-16	1	1.1479e-15	2.5018e-13	FALSE
LDLR_5	LDLR	7405.2/5298.2/2897.7	74.813/93.551/553.12	5298.2	93.551	-5.8085	5101000	461300	7.663	6.0064e-15	1	1.2013e-14	2.485e-12	FALSE
LDLR_6	LDLR	6483/5763.4/2515.4	89.411/548.4/328.6	5763.4	328.6	-4.1284	5533600	504760	7.6497	9.8236e-15	1	1.9647e-14	3.9966e-12	FALSE
AP2M1_6	AP2M1	7618.6/7734.9/2958.6	1446.1/1289.3/2853.3	7618.6	1446.1	-2.3966	10865000	680310	7.4836	3.6153e-14	1	7.2306e-14	1.4115e-11	FALSE
LDLR_9	LDLR	6379.2/5486.8/2669.1	299.25/488.18/352.69	5486.8	352.69	-3.9557	4368000	478890	7.419	5.788e-14	1	1.1576e-13	2.2076e-11	FALSE
SCAP_1	SCAP	5153.5/6084.1/3783	307.46/1.0753/828.72	5153.5	307.46	-4.0627	1372100	447840	7.2414	2.1524e-13	1	4.3048e-13	7.7265e-11	FALSE
HNF4A_4	HNF4A	5936.7/4154.8/5222	367.68/681.74/503.98	5222	503.98	-3.3706	824810	454210	7.0005	1.2705e-12	1	2.5411e-12	4.1141e-10	FALSE
LDLR_3	LDLR	5269/6811.6/2835.8	748.13/393.56/529.03	5269	529.03	-3.3137	4149900	458590	6.9995	1.2809e-12	1	2.5618e-12	4.1141e-10	FALSE
LDLR_2	LDLR	8177.7/6999.3/5568.6	1010/1643/1519.6	6999.3	1519.6	-2.2027	1717700	621330	6.9517	1.8047e-12	1	3.6094e-12	5.7211e-10	FALSE
LDLR_12	LDLR	6728.7/7016.3/2982.9	1352.1/1445.2/2471.7	6728.7	1445.2	-2.2183	7056900	595680	6.8457	3.8049e-12	1	7.6099e-12	1.119e-09	FALSE
LDLR_4	LDLR	5947.5/5782.3/2825.5	1152.3/480.66/2236.6	5782.3	1152.3	-2.3261	4384800	506520	6.5055	3.8722e-11	1	7.7444e-11	9.645e-09	FALSE
MBTPS1_14	MBTPS1	5955.3/6869/5196.7	1278.2/273.12/1496.5	5955.3	1278.2	-2.2192	705210	522750	6.4689	4.9364e-11	1	9.8729e-11	1.2172e-08	FALSE
C21orf59_6	C21orf59	6458.5/3183/6021.1	970.74/1712.9/1601.5	6021.1	1601.5	-1.9099	4123000	528930	6.0769	6.1278e-10	1	1.2256e-09	1.2785e-07	FALSE
STK11_5	STK11	6065.9/5888.3/8795.1	3059.1/1128/1631.4	6065.9	1631.4	-1.894	3740000	533140	6.0733	6.2658e-10	1	1.2532e-09	1.2853e-07	FALSE
LDLR_10	LDLR	4153/4972.1/1720	548.32/122.58/1241.2	4153	548.32	-2.9188	3295100	355520	6.0458	7.4326e-10	1	1.4865e-09	1.4631e-07	FALSE
EXOC2_11	EXOC2	3764.3/2321.7/3517.9	239.04/391.41/212	3517.9	239.04	-3.8738	745740	297690	6.0196	8.7418e-10	1	1.7484e-09	1.7071e-07	FALSE
SCAP_2	SCAP	2281.1/2211.2/983.69	0/0/204.29	2211.2	0	-11.111	755880	181180	5.97	1.1865e-09	1	2.3729e-09	2.2451e-07	FALSE
HNF4A_5	HNF4A	3693.8/2458.2/4083.7	110.39/364.52/362.32	3693.8	362.32	-3.3462	839330	313650	5.9512	1.3309e-09	1	2.6618e-09	2.4799e-07	FALSE
HNF4A_13	HNF4A	3255.2/1737.9/4263.6	315.67/123.66/210.07	3255.2	210.07	-3.9474	1659500	273990	5.8322	2.7352e-09	1	5.4704e-09	4.6689e-07	FALSE
SCAP_9	SCAP	3495.1/3579.1/2128.5	1042.8/340.87/372.92	3495.1	372.92	-3.2249	937260	295630	5.7445	4.6091e-09	1	9.2181e-09	7.3534e-07	FALSE
CDIPT_4	CDIPT	3741.8/3865.6/5061.8	615.84/805.4/573.36	3865.6	615.84	-2.6481	723050	329280	5.6636	7.413e-09	1	1.4826e-08	1.131e-06	FALSE
MBTPS1_2	MBTPS1	4005.1/3712.9/1297.5	637.73/86.024/742.96	3712.9	637.73	-2.5397	2959800	315390	5.476	2.1748e-08	1	4.3496e-08	3.1412e-06	FALSE
CCDC22_1	CCDC22	2790.2/3672.5/3770.8	678.79/621.52/380.63	3672.5	621.52	-2.561	394100	311720	5.4649	2.3164e-08	1	4.6328e-08	3.3261e-06	FALSE
MBTPS1_3	MBTPS1	6206.9/4507.8/3062.5	911.44/1158.1/2522.8	4507.8	1158.1	-1.9598	2487900	388100	5.3769	3.7882e-08	1	7.5763e-08	5.1372e-06	FALSE
SCAP_12	SCAP	2571.9/2842.6/1676	479.9/0/116.6	2571.9	116.6	-4.4514	437930	212950	5.3706	3.923e-08	1	7.8459e-08	5.2906e-06	FALSE
HNF4A_9	HNF4A	4305.7/5756.2/4347.9	1099.4/1625.8/793.06	4347.9	1099.4	-1.9826	992590	373400	5.3162	5.2982e-08	1	1.0596e-07	6.9242e-06	FALSE
SCARB1_5	SCARB1	2335.9/3130.9/6370.5	643.21/336.57/419.18	3130.9	419.18	-2.898	5563500	262820	5.2912	6.077e-08	1	1.2154e-07	7.726e-06	FALSE
ELOF1_3	ELOF1	3850.4/1513.4/2594.1	229.91/0/157.07	2594.1	157.07	-4.0372	1373200	214930	5.2866	6.2305e-08	1	1.2461e-07	7.8801e-06	FALSE
SCAP_7	SCAP	4233.2/3453.4/2126.6	832.98/373.13/649.48	3453.4	649.48	-2.4088	1184200	291860	5.1902	1.0503e-07	1	2.1007e-07	1.2692e-05	FALSE
C16orf62_1	C16orf62	3221.9/3065.4/3505.7	452.53/659.16/528.07	3221.9	528.07	-2.6068	52511	270990	5.1753	1.1376e-07	1	2.2752e-07	1.3679e-05	FALSE
DCPS_6	DCPS	3919.9/3069/5227.6	931.51/1165.6/932.79	3919.9	932.79	-2.07	1217100	334230	5.167	1.1894e-07	1	2.3789e-07	1.4232e-05	FALSE
STK11_3	STK11	3933.7/2804.9/4056.5	2540.9/894.64/953.99	3933.7	953.99	-2.0427	644570	335480	5.1444	1.3417e-07	1	2.6835e-07	1.5671e-05	FALSE
SCAP_11	SCAP	4084.4/3177.6/2934.2	428.81/530.12/727.54	3177.6	530.12	-2.5813	440750	267010	5.1241	1.4948e-07	1	2.9896e-07	1.7051e-05	FALSE
CHD7_14	CHD7	3719.3/4578.8/3843.9	1294.6/881.74/943.39	3843.9	943.39	-2.0255	277790	327290	5.0699	1.9898e-07	1	3.9796e-07	2.1684e-05	FALSE
STK11_15	STK11	2661.9/3435.4/3548.8	706.16/411.84/892.32	3435.4	706.16	-2.2808	305570	290240	5.0661	2.0303e-07	1	4.0607e-07	2.1983e-05	FALSE
SCARB1_15	SCARB1	2569.9/2404.3/5711	556.53/245.17/270.78	2569.9	270.78	-3.2418	4947000	212780	4.9922	2.9845e-07	1	5.9689e-07	3.061e-05	FALSE
TAF8_1	TAF8	1821.9/2612.7/2579.1	494.49/289.25/278.49	2579.1	289.25	-3.1521	287240	213600	4.9612	3.503e-07	1	7.0059e-07	3.548e-05	FALSE
HAVCR1_13	HAVCR1	3672.3/2534.6/3579.7	1083.9/458.08/871.12	3579.7	871.12	-2.0376	550410	303290	4.9182	4.3665e-07	1	8.733e-07	4.3328e-05	FALSE
TAF8_8	TAF8	3001.6/1824.1/2900.5	539.2/487.11/466.4	2900.5	487.11	-2.5715	584360	242180	4.9048	4.6753e-07	1	9.3506e-07	4.6018e-05	FALSE
PIK3C3_15	PIK3C3	4647.4/3862/2626	1065.6/1243/820.05	3862	1065.6	-1.8567	1072300	328950	4.8757	5.4212e-07	1	1.0842e-06	5.2512e-05	FALSE
PIK3C3_12	PIK3C3	1202.2/1449.6/888.13	0/91.4/0	1202.2	0	-10.233	79928	94423	4.8675	5.652e-07	1	1.1304e-06	5.3683e-05	FALSE
HNF4A_2	HNF4A	2991.8/1572.7/3123.4	710.72/436.57/562.76	2991.8	562.76	-2.4084	1015700	250350	4.8552	6.0141e-07	1	1.2028e-06	5.6901e-05	FALSE
CSNK1A1_15	CSNK1A1	1915.9/955.63/1184.2	114.04/0/0	1184.2	0	-10.211	293840	92908	4.8447	6.3413e-07	1	1.2683e-06	5.9765e-05	FALSE
FNDC3B_1	FNDC3B	1091.6/1318.5/1173.9	83.936/0/0	1173.9	0	-10.198	13841	92043	4.8316	6.7727e-07	1	1.3545e-06	6.286e-05	FALSE
RAB10_7	RAB10	2604.2/3492.9/2311.2	365.85/264.52/1424.2	2604.2	365.85	-2.8281	437840	215820	4.821	7.1419e-07	1	1.4284e-06	6.6036e-05	FALSE
SCARB1_12	SCARB1	4017.8/3683.3/12667	1208/1864.6/735.25	4017.8	1208	-1.733	37461000	343160	4.7967	8.0661e-07	1	1.6132e-06	7.3195e-05	FALSE
HNF4A_1	HNF4A	2307.5/1363.4/2116.3	739.01/0/147.43	2116.3	147.43	-3.8343	301740	172880	4.7715	9.1423e-07	1	1.8285e-06	8.2045e-05	FALSE
USP22_14	USP22	2780.4/2064.8/2930.5	1016.4/491.41/439.41	2780.4	491.41	-2.4979	267260	231470	4.7584	9.7554e-07	1	1.9511e-06	8.6207e-05	FALSE
CSNK1A1_1	CSNK1A1	2420.1/878.39/2007.7	129.55/1.0753/278.49	2007.7	129.55	-3.9435	722680	163400	4.6924	1.3504e-06	1	2.7008e-06	0.00011485	FALSE
ELOF1_11	ELOF1	2119.6/2032.5/1685.4	144.15/29.033/427.85	2032.5	144.15	-3.8083	64036	165560	4.6791	1.4407e-06	1	2.8814e-06	0.00012169	FALSE
ATP11A_11	ATP11A	3041.8/2432.2/4445.3	687.91/537.65/767.05	3041.8	687.91	-2.143	1170800	254820	4.6631	1.5573e-06	1	3.1146e-06	0.00013018	FALSE
DCPS_3	DCPS	2049.1/2769/2839.6	533.73/343.02/1231.5	2769	533.73	-2.373	261640	230460	4.6567	1.6063e-06	1	3.2125e-06	0.00013382	FALSE
ATP11A_4	ATP11A	2403.5/2707/2429.2	874.03/355.92/240.91	2429.2	355.92	-2.7674	38913	200350	4.6353	1.7818e-06	1	3.5636e-06	0.00014644	FALSE
SCARB1_10	SCARB1	2301.6/1840.3/4820.1	647.77/289.25/198.51	2301.6	289.25	-2.9879	3277600	189120	4.6344	1.79e-06	1	3.58e-06	0.00014662	FALSE
CSNK1A1_9	CSNK1A1	2627.7/2324.4/4195.2	1020/455.92/472.18	2627.7	472.18	-2.4739	1274600	217900	4.6186	1.932e-06	1	3.8639e-06	0.00015607	FALSE
MPDU1_11	MPDU1	2047.1/1110.1/2553.8	305.64/80.647/179.23	2047.1	179.23	-3.5063	567370	166840	4.5978	2.1344e-06	1	4.2688e-06	0.00016971	FALSE
MBTPS2_11	MBTPS2	2660/3105.8/2984.8	690.65/340.87/778.61	2984.8	690.65	-2.11	60077	249720	4.591	2.2057e-06	1	4.4114e-06	0.00017368	FALSE
CCDC22_11	CCDC22	2527.8/2331.6/4558.7	440.67/696.79/38.545	2527.8	440.67	-2.5174	2081500	209050	4.5661	2.4839e-06	1	4.9678e-06	0.00019067	FALSE
HNF4A_10	HNF4A	1683.9/1774.7/1744.4	177/0/77.09	1744.4	77.09	-4.4823	2291	140600	4.5471	2.7194e-06	1	5.4387e-06	0.00020679	FALSE
CDIPT_10	CDIPT	1485.2/4402.7/3356.7	941.55/710.77/977.12	3356.7	941.55	-1.8328	2298400	283130	4.5389	2.8272e-06	1	5.6544e-06	0.00021235	FALSE
USP22_4	USP22	2769.6/3056.4/2603.5	466.21/1189.3/593.59	2769.6	593.59	-2.2202	54921	230510	4.5326	2.9137e-06	1	5.8273e-06	0.00021638	FALSE
AP2M1_12	AP2M1	2922.3/2276.8/1958.9	169.7/319.36/1172.7	2276.8	319.36	-2.8299	258870	186930	4.5324	2.9164e-06	1	5.8329e-06	0.00021638	FALSE
CDIPT_13	CDIPT	3196.5/3219/3198.4	857.61/1255.9/519.39	3198.4	857.61	-1.8977	213.51	268880	4.5143	3.1768e-06	1	6.3537e-06	0.00023357	FALSE
STK11_7	STK11	2134.2/751.75/2730.9	573.87/267.75/187.91	2134.2	267.75	-2.9901	1133600	174440	4.4778	3.7703e-06	1	7.5405e-06	0.00027555	FALSE
CHD7_12	CHD7	2228.2/2722.3/2804	312.94/593.56/1144.8	2722.3	593.56	-2.1954	125390	226300	4.4751	3.8186e-06	1	7.6371e-06	0.00027824	FALSE
ALG8_3	ALG8	2054/2188.8/3217.1	526.43/297.86/135.87	2188.8	297.86	-2.8733	537830	179220	4.4731	3.8546e-06	1	7.7093e-06	0.00027892	FALSE
hsa-mir-6886_2	hsa-mir-6886	3456.9/3118.4/2609.1	715.28/1002.2/836.43	3118.4	836.43	-1.8972	186960	261690	4.4608	4.082e-06	1	8.1641e-06	0.00029086	FALSE
HAVCR1_10	HAVCR1	3085.8/3165.1/3846.7	926.04/876.36/874.97	3165.1	876.36	-1.8514	235440	265880	4.4386	4.5267e-06	1	9.0533e-06	0.00031843	FALSE
AP2M1_2	AP2M1	2601.2/3195.6/1493.3	542.85/373.13/720.79	2601.2	542.85	-2.2585	790360	215560	4.434	4.6256e-06	1	9.2513e-06	0.00032337	FALSE
ATP11A_3	ATP11A	1954.1/2663.9/3330.5	587.55/965.61/259.22	2663.9	587.55	-2.1788	474080	221120	4.4159	5.0287e-06	0.99999	1.0057e-05	0.00034676	FALSE
POLR2L_1	POLR2L	861.53/1076.9/740.11	0/0/217.78	861.53	0	-9.7524	30560	66117	4.4087	5.1998e-06	0.99999	1.04e-05	0.00035614	FALSE
INTS1_1	INTS1	861.53/849.65/1081.1	0/235.49/0	861.53	0	-9.7524	24181	66117	4.4087	5.1998e-06	0.99999	1.04e-05	0.00035614	FALSE
SCARB1_11	SCARB1	3019.3/2476.2/6282.5	1155/804.32/794.03	3019.3	804.32	-1.907	5471800	252800	4.4053	5.2818e-06	0.99999	1.0564e-05	0.00035913	FALSE
ELOF1_5	ELOF1	3706.5/2183.4/2770.3	1189.7/657/643.7	2770.3	657	-2.0744	610500	230570	4.4011	5.3841e-06	0.99999	1.0768e-05	0.00036507	FALSE
EXOC3_15	EXOC3	4523/3289/3259.3	987.17/1248.4/893.28	3289	987.17	-1.7353	761820	277030	4.3733	6.1179e-06	0.99999	1.2236e-05	0.00041082	FALSE
GET4_15	GET4	2075.5/1131.7/2369.3	822.03/151.62/279.45	2075.5	279.45	-2.8883	488560	169310	4.3729	6.1317e-06	0.99999	1.2263e-05	0.00041082	FALSE
LDLR_7	LDLR	2692.3/1640/1955.2	229/239.79/215.85	1955.2	229	-3.0883	321310	158840	4.3455	6.9485e-06	0.99999	1.3897e-05	0.00045746	FALSE
GMPPB_12	GMPPB	555.1/1211.6/817.87	0/0/339.2	817.87	0	-9.6775	112040	62540	4.3448	6.971e-06	0.99999	1.3942e-05	0.00045746	FALSE
RABIF_13	RABIF	3102.5/2522/2163.2	1137.7/417.21/559.87	2522	559.87	-2.1694	232850	208540	4.2971	8.6525e-06	0.99999	1.7305e-05	0.00054948	FALSE
COMMD3_8	COMMD3	2544.4/2842.6/2494.8	1218/573.13/529.03	2544.4	573.13	-2.1485	45692	210530	4.2967	8.6665e-06	0.99999	1.7333e-05	0.00054948	FALSE
DHRSX_4	DHRSX	785.16/977.19/620.19	44.705/0/0	785.16	0	-9.6187	32044	59870	4.296	8.6971e-06	0.99999	1.7394e-05	0.00054999	FALSE
TAF8_3	TAF8	3439.3/2719.6/2695.3	409.65/677.44/680.32	2719.6	677.44	-2.0036	259250	226060	4.2953	8.7247e-06	0.99999	1.7449e-05	0.00055031	FALSE
hsa-mir-6886_8	hsa-mir-6886	2622.8/1963.4/2891.1	1538.2/620.44/606.12	2622.8	620.44	-2.0779	253410	217460	4.294	8.7741e-06	0.99999	1.7548e-05	0.000552	FALSE
C21orf59_10	C21orf59	1246.3/778.69/607.08	0/0/0	778.69	0	-9.6068	124040	59342	4.2862	9.0878e-06	0.99999	1.8176e-05	0.00056623	FALSE
CDIPT_9	CDIPT	2001.1/2090.9/2470.5	322.97/232.26/793.06	2090.9	322.97	-2.6909	76069	170660	4.2846	9.1543e-06	0.99999	1.8309e-05	0.00056859	FALSE
C16orf62_7	C16orf62	3455.9/4817.7/4087.5	1621.2/1102.2/1556.3	4087.5	1556.3	-1.3925	466040	349520	4.2814	9.2855e-06	0.99999	1.8571e-05	0.00057382	FALSE
PTPMT1_1	PTPMT1	2211.6/3166.9/1522.4	390.49/336.57/844.14	2211.6	390.49	-2.4987	693790	181210	4.2804	9.3276e-06	0.99999	1.8655e-05	0.00057497	FALSE
ELOF1_9	ELOF1	1526.3/2115.1/2712.2	653.24/341.94/137.8	2115.1	341.94	-2.6254	351600	172770	4.2701	9.7713e-06	0.99999	1.9543e-05	0.00059779	FALSE
EEFSEC_11	EEFSEC	3552.8/3784.8/2968.9	1704.3/731.2/1218	3552.8	1218	-1.5436	197410	300860	4.2566	1.0376e-05	0.99999	2.0753e-05	0.00063007	FALSE
MGAT1_13	MGAT1	2031.4/2794.1/2789	723.5/954.86/741.03	2789	741.03	-1.9107	286950	232240	4.2497	1.0701e-05	0.99999	2.1401e-05	0.00064336	FALSE
KMT2D_7	KMT2D	746/167.06/1064.3	0/0/9.6363	746	0	-9.545	218230	56682	4.2364	1.1358e-05	0.99999	2.2717e-05	0.00067236	FALSE
USP22_2	USP22	4170.6/4141.4/3388.6	1121.3/1619.4/2001.5	4141.4	1619.4	-1.3541	283780	354460	4.236	1.1376e-05	0.99999	2.2752e-05	0.00067236	FALSE
EXOC1_12	EXOC1	2315.4/1819.6/2224.1	419.68/1035.5/395.09	2224.1	419.68	-2.403	85945	182310	4.2278	1.1799e-05	0.99999	2.3599e-05	0.00069071	FALSE
AP2M1_1	AP2M1	2676.6/2968.4/1094.2	327.53/698.94/699.59	2676.6	698.94	-1.9356	1294500	222240	4.1952	1.3633e-05	0.99999	2.7265e-05	0.0007867	FALSE
ATP11A_9	ATP11A	2003.1/956.53/1905.5	262.76/845.18/247.65	1905.5	262.76	-2.8537	455070	154530	4.189	1.4012e-05	0.99999	2.8023e-05	0.00080666	FALSE
CCDC115_12	CCDC115	2816.6/2500.4/1890.6	596.68/397.86/738.14	2500.4	596.68	-2.0653	235960	206640	4.1883	1.405e-05	0.99999	2.81e-05	0.00080696	FALSE
TAF1_5	TAF1	2725.6/1983.1/2562.3	1205.2/636.57/251.51	2562.3	636.57	-2.0073	181040	212110	4.1815	1.4478e-05	0.99999	2.8957e-05	0.00082962	FALSE
AP2M1_11	AP2M1	2239/1799/1341.6	62.952/212.91/447.12	1799	212.91	-3.0729	201420	145310	4.1785	1.4669e-05	0.99999	2.9338e-05	0.00083661	FALSE
GDI2_7	GDI2	2128.4/1368.8/2090.1	713.46/365.6/70.345	2090.1	365.6	-2.512	260890	170590	4.1785	1.4669e-05	0.99999	2.9338e-05	0.00083661	FALSE
DHRSX_10	DHRSX	558.03/2178.9/1725.7	176.08/178.5/181.16	1725.7	178.5	-3.2659	784400	138980	4.1769	1.4777e-05	0.99999	2.9555e-05	0.00083887	FALSE
TMEM30A_9	TMEM30A	1487.1/2046/2022.6	416.03/16.129/332.45	2022.6	332.45	-2.6014	143670	164710	4.1693	1.5277e-05	0.99998	3.0554e-05	0.00086523	FALSE
USP9X_3	USP9X	1717.2/684.39/1721.9	103.1/179.57/753.56	1717.2	179.57	-3.2502	533340	138250	4.1618	1.5786e-05	0.99998	3.1572e-05	0.00088788	FALSE
MBTPS1_12	MBTPS1	1590.9/2222/1457.7	55.653/125.81/725.61	1590.9	125.81	-3.65	208030	127400	4.1574	1.6098e-05	0.99998	3.2195e-05	0.00090331	FALSE
GAGE1_13	GAGE1	329.93/861.32/689.52	0/0/179.23	689.52	0	-9.4315	79412	52105	4.1481	1.6765e-05	0.99998	3.3531e-05	0.00093649	FALSE
CCDC115_8	CCDC115	4944/6368.8/4038.7	4039.9/2230.2/2073.7	4944	2230.2	-1.1482	1424700	428400	4.1463	1.6896e-05	0.99998	3.3791e-05	0.00094161	FALSE
AXIN1_6	AXIN1	1268.8/2230.1/2205.3	571.13/445.17/375.81	2205.3	445.17	-2.306	438860	180660	4.1425	1.7176e-05	0.99998	3.4352e-05	0.00095071	FALSE
TMEM30A_5	TMEM30A	2601.2/3690.5/3810.1	1716.1/1374.2/861.48	3690.5	1374.2	-1.4245	600410	313350	4.1379	1.7528e-05	0.99998	3.5055e-05	0.00096799	FALSE
CDIPT_8	CDIPT	2773.5/2928/2249.4	581.17/1537.7/788.25	2773.5	788.25	-1.8137	149300	230860	4.1319	1.7987e-05	0.99998	3.5974e-05	0.00098887	FALSE
NELFB_1	NELFB	2662.9/1567.3/823.49	124.08/101.08/557.94	1567.3	124.08	-3.6483	876810	125380	4.13	1.8139e-05	0.99998	3.6278e-05	0.00099276	FALSE
INTS1_2	INTS1	1561.5/1988.5/1840	1509.9/132.26/252.47	1840	252.47	-2.8606	49798	148850	4.126	1.8457e-05	0.99998	3.6913e-05	0.0010079	FALSE
MESDC2_2	MESDC2	2264.4/2206.8/1072.7	687.91/0/453.87	2206.8	453.87	-2.2791	644710	180790	4.1239	1.8629e-05	0.99998	3.7258e-05	0.001015	FALSE
ATP11A_1	ATP11A	3521.5/3228.8/2492.9	1080.2/1283.9/616.72	3228.8	1080.2	-1.5788	313590	271610	4.1227	1.8722e-05	0.99998	3.7443e-05	0.0010162	FALSE
GDI2_5	GDI2	2788.2/2992.6/1956.1	804.69/1197.9/354.61	2788.2	804.69	-1.7916	367070	232170	4.1166	1.9224e-05	0.99998	3.8449e-05	0.0010336	FALSE
CCDC22_6	CCDC22	1060.3/1732.5/1706	682.44/137.64/189.83	1706	189.83	-3.1611	208840	137290	4.1155	1.9319e-05	0.99998	3.8637e-05	0.0010364	FALSE
CDIPT_12	CDIPT	2190/1521.5/2120.1	480.81/409.69/286.2	2120.1	409.69	-2.3687	181620	173210	4.1118	1.9629e-05	0.99998	3.9258e-05	0.0010508	FALSE
AXIN1_8	AXIN1	2633.5/3207.3/3331.4	1536.4/1074.2/1028.2	3207.3	1074.2	-1.5772	172300	269680	4.1076	1.9993e-05	0.99998	3.9985e-05	0.0010663	FALSE
MRP63_7	MRP63	658.87/674.51/535.88	0/144.09/0	658.87	0	-9.366	7686.4	49632	4.0989	2.0758e-05	0.99998	4.1516e-05	0.0010897	FALSE
ZBTB8OS_3	ZBTB8OS	844.88/194/654.85	0/0/0	654.85	0	-9.3572	124250	49308	4.0924	2.135e-05	0.99998	4.2701e-05	0.0011089	FALSE
WDR82_12	WDR82	653.98/349.38/928.41	0/0/46.254	653.98	0	-9.3553	84047	49238	4.0909	2.1482e-05	0.99998	4.2964e-05	0.0011112	FALSE
INTS12_12	INTS12	1178.7/2099.9/2242.8	406.91/367.75/571.43	2099.9	406.91	-2.3647	434470	171440	4.0909	2.1487e-05	0.99998	4.2975e-05	0.0011112	FALSE
DHRSX_1	DHRSX	1079.8/1600.5/2124.8	573.87/90.325/154.18	1600.5	154.18	-3.3674	272970	128230	4.0759	2.2921e-05	0.99998	4.5842e-05	0.0011654	FALSE
GAPDH_2	GAPDH	984.88/1196.3/662.35	264.58/0/8.6726	984.88	8.6726	-6.6714	74369	76289	4.0752	2.2984e-05	0.99998	4.5968e-05	0.0011654	FALSE
PIK3C3_11	PIK3C3	1036.8/1400.2/1418.4	78.462/169.9/27.945	1400.2	78.462	-4.1403	66211	111140	4.071	2.3405e-05	0.99998	4.6811e-05	0.0011829	FALSE
FDX1L_2	FDX1L	428.81/713.13/637.99	0/0/212	637.99	0	-9.3197	24702	47952	4.0648	2.4035e-05	0.99998	4.8071e-05	0.0012122	FALSE
CHD7_10	CHD7	2700.1/1332.9/2018.9	593.03/375.28/298.72	2018.9	375.28	-2.4244	467350	164380	4.0569	2.4861e-05	0.99998	4.9723e-05	0.001243	FALSE
GET4_8	GET4	3480.4/1890.6/3541.3	3277.2/1268.8/1279.7	3480.4	1279.7	-1.4427	1265500	294300	4.0566	2.49e-05	0.99998	4.98e-05	0.001243	FALSE
UBA2_3	UBA2	337.76/629.6/883.44	0/0/0	629.6	0	-9.3006	74805	47278	4.051	2.55e-05	0.99997	5.1e-05	0.0012703	FALSE
KDM6A_11	KDM6A	2481.8/1790.9/2456.4	476.25/1454.9/635.03	2456.4	635.03	-1.95	221770	202750	4.0453	2.6132e-05	0.99997	5.2264e-05	0.0012991	FALSE
CSNK1A1_8	CSNK1A1	1971.7/1595.1/1825.9	277.36/488.18/38.545	1825.9	277.36	-2.7144	37265	147630	4.0389	2.6847e-05	0.99997	5.3695e-05	0.0013293	FALSE
HNRNPU_11	HNRNPU	2702.1/1872.6/2690.6	784.62/1069.9/673.58	2690.6	784.62	-1.7766	334610	223490	4.0318	2.7673e-05	0.99997	5.5347e-05	0.0013646	FALSE
TRIAP1_6	TRIAP1	1088.7/1834.9/2077	285.57/251.62/456.76	1834.9	285.57	-2.6796	307750	148410	4.0297	2.7928e-05	0.99997	5.5857e-05	0.0013717	FALSE
PIK3C3_14	PIK3C3	2271.3/3561.2/3277.1	2653.1/1161.3/1157.3	3277.1	1161.3	-1.4958	546150	275960	4.0276	2.8173e-05	0.99997	5.6347e-05	0.0013809	FALSE
TAF8_7	TAF8	4945.9/4998.2/6553.2	2951.5/2349.5/2053.5	4998.2	2349.5	-1.0887	1210400	433420	4.0232	2.8705e-05	0.99997	5.7409e-05	0.0013958	FALSE
MGAT1_10	MGAT1	2087.2/1994.8/1974.9	375.89/680.66/360.4	1994.8	375.89	-2.4047	4472.6	162280	4.0217	2.8892e-05	0.99997	5.7784e-05	0.0013993	FALSE
ARFRP1_8	ARFRP1	756.77/608.94/471.23	22.809/0/0	608.94	0	-9.2525	20409	45621	4.0166	2.9517e-05	0.99997	5.9034e-05	0.0014183	FALSE
STK11_12	STK11	608.94/1243.9/385.98	67.514/0/0	608.94	0	-9.2525	226460	45621	4.0166	2.9517e-05	0.99997	5.9034e-05	0.0014183	FALSE
TAF1B_13	TAF1B	126.29/629.6/608.01	67.514/0/0	608.01	0	-9.2503	116260	45546	4.0151	2.9713e-05	0.99997	5.9426e-05	0.0014249	FALSE
MESDC2_1	MESDC2	2411.3/2132.2/1664.8	549.24/376.35/462.54	2132.2	462.54	-2.2023	148190	174260	4.0009	3.1552e-05	0.99997	6.3105e-05	0.0014948	FALSE
ELOF1_8	ELOF1	3534.2/2758.2/2172.5	842.1/665.61/1021.4	2758.2	842.1	-1.7105	472600	229500	3.9998	3.1702e-05	0.99997	6.3403e-05	0.0014968	FALSE
LDLR_15	LDLR	1742.6/2649.5/1522.4	249.07/426.89/207.18	1742.6	249.07	-2.8017	435490	140440	3.9974	3.2022e-05	0.99997	6.4043e-05	0.0015061	FALSE
AXIN1_2	AXIN1	1966.8/2763.6/2101.3	449.79/460.23/318	2101.3	449.79	-2.2215	228340	171570	3.9886	3.3226e-05	0.99997	6.6451e-05	0.0015448	FALSE
CCDC115_11	CCDC115	2208.6/2892/1563.6	530.99/515.07/452.9	2208.6	515.07	-2.0982	441560	180950	3.982	3.4172e-05	0.99997	6.8344e-05	0.0015828	FALSE
SCAP_8	SCAP	2910.6/2980.1/2900.5	624.96/1496.8/952.06	2910.6	952.06	-1.6112	2463.9	243080	3.9724	3.5575e-05	0.99996	7.115e-05	0.0016447	FALSE
ATXN7L3_5	ATXN7L3	2446.5/2177.1/2052.6	502.71/483.88/1408.8	2177.1	502.71	-2.1124	44044	178190	3.9674	3.6332e-05	0.99996	7.2663e-05	0.0016702	FALSE
ATP5I_2	ATP5I	702.93/1677.7/1677.9	228.09/298.93/124.31	1677.7	228.09	-2.8734	475130	134860	3.9629	3.7023e-05	0.99996	7.4046e-05	0.0016956	FALSE
MBTPS2_9	MBTPS2	2688.4/2939.6/1987	817.47/448.4/835.46	2688.4	817.47	-1.7163	277490	223290	3.9593	3.7581e-05	0.99996	7.5162e-05	0.0017179	FALSE
CDC73_1	CDC73	1349.1/309.86/596.77	454.35/1.0753/0	596.77	1.0753	-8.1701	324140	44646	3.9568	3.7979e-05	0.99996	7.5958e-05	0.0017315	FALSE
hsa-mir-6886_9	hsa-mir-6886	3446.1/4400.9/2853.6	1312.9/957.01/3029.6	3446.1	1312.9	-1.3916	631350	291210	3.9531	3.8572e-05	0.99996	7.7144e-05	0.0017436	FALSE
SPATA5_5	SPATA5	565.87/544.28/592.09	28.283/0/0	565.87	0	-9.1469	576.77	42178	3.9434	4.0173e-05	0.99996	8.0346e-05	0.0018021	FALSE
EXOC2_6	EXOC2	2053/2531.9/1853.1	440.67/1471/405.69	2053	440.67	-2.2174	134650	167350	3.9428	4.0262e-05	0.99996	8.0525e-05	0.0018021	FALSE
HNF4A_15	HNF4A	2413.3/1562.8/2712.2	320.24/654.85/1147.7	2413.3	654.85	-1.8801	406330	198940	3.9426	4.0309e-05	0.99996	8.0617e-05	0.0018021	FALSE
MGAT1_12	MGAT1	2325.1/4762/3201.2	570.22/1609.7/1161.2	3201.2	1161.2	-1.4622	1601800	269130	3.9324	4.2052e-05	0.99996	8.4104e-05	0.0018663	FALSE
EXOC2_1	EXOC2	2354.5/2284.9/1632	897.75/433.34/582.99	2284.9	582.99	-1.9687	215570	187640	3.9292	4.2609e-05	0.99996	8.5218e-05	0.0018799	FALSE
HAVCR1_3	HAVCR1	2792.1/2014.5/2753.4	874.95/752.71/1632.4	2753.4	874.95	-1.6528	273690	229070	3.9248	4.34e-05	0.99996	8.68e-05	0.0018986	FALSE
SCARB1_4	SCARB1	3326.7/3737.2/10081	2786.3/1532.3/821.97	3737.2	1532.3	-1.2857	20209000	317590	3.9125	4.5669e-05	0.99995	9.1339e-05	0.0019836	FALSE
STRAP_5	STRAP	1735.8/936.77/2446.1	423.33/276.35/182.13	1735.8	276.35	-2.6466	571490	139850	3.9115	4.5862e-05	0.99995	9.1724e-05	0.0019884	FALSE
NUDT21_3	NUDT21	638.31/511.94/547.12	0/0/146.47	547.12	0	-9.0983	4776.9	40685	3.9107	4.6008e-05	0.99995	9.2016e-05	0.0019912	FALSE
SNF8_11	SNF8	543.35/438.3/613.63	0/0/157.07	543.35	0	-9.0884	7988	40386	3.9041	4.7285e-05	0.99995	9.457e-05	0.0020285	FALSE
CSNK1A1_4	CSNK1A1	1426.4/1873.5/2225	383.19/0/354.61	1873.5	354.61	-2.3981	161720	151750	3.9029	4.7517e-05	0.99995	9.5034e-05	0.0020313	FALSE
ATP5O_2	ATP5O	754.82/500.27/542.43	0/0/193.69	542.43	0	-9.086	23442	40313	3.9025	4.7601e-05	0.99995	9.5202e-05	0.0020314	FALSE
SETDB1_7	SETDB1	2233.1/2674.7/1796.9	1060.2/237.64/569.5	2233.1	569.5	-1.9694	192650	183100	3.8883	5.048e-05	0.99995	0.00010096	0.0021184	FALSE
CCDC115_9	CCDC115	3156.3/4982.9/2240	1416.9/1024.8/1154.4	3156.3	1154.4	-1.4503	2088100	265090	3.8881	5.0509e-05	0.99995	0.00010102	0.0021184	FALSE
HNF4A_6	HNF4A	1692.7/1739.7/1484	200.72/280.65/263.07	1692.7	263.07	-2.6812	22892	136140	3.885	5.1158e-05	0.99995	0.00010232	0.0021287	FALSE
FNDC3B_6	FNDC3B	2717.7/1499/2221.3	563.83/1179.6/485.67	2221.3	563.83	-1.9761	384060	182060	3.8849	5.119e-05	0.99995	0.00010238	0.0021287	FALSE
PIAS1_13	PIAS1	1609.5/2931.6/2874.2	683.35/1357/974.23	2874.2	974.23	-1.5599	801440	239840	3.8797	5.229e-05	0.99995	0.00010458	0.0021525	FALSE
RABIF_15	RABIF	2370.2/2751/2091	557.45/922.6/657.19	2370.2	657.19	-1.849	111480	195140	3.8779	5.268e-05	0.99995	0.00010536	0.0021649	FALSE
NAA10_13	NAA10	1893.4/931.38/1593.6	215.32/168.82/833.54	1593.6	215.32	-2.882	264200	127630	3.876	5.3103e-05	0.99995	0.00010621	0.0021786	FALSE
PROX1_12	PROX1	1071/2242.7/2179.1	542.85/374.2/779.57	2179.1	542.85	-2.0031	615930	178370	3.8749	5.3343e-05	0.99995	0.00010669	0.0021811	FALSE
GPN2_1	GPN2	1154.3/1527.8/1308.8	92.148/0/213.93	1308.8	92.148	-3.8137	35914	103400	3.8727	5.3815e-05	0.99995	0.00010763	0.0021941	FALSE
CEBPA_2	CEBPA	1829.8/1319.4/1919.6	554.71/269.9/344.01	1829.8	344.01	-2.4077	134280	147970	3.8668	5.5138e-05	0.99994	0.00011028	0.0022321	FALSE
SCARB1_8	SCARB1	2855.8/2128.6/4610.2	1154.1/696.79/970.37	2855.8	970.37	-1.5563	1803400	238190	3.8632	5.5966e-05	0.99994	0.00011193	0.002258	FALSE
ELOF1_10	ELOF1	4123.6/3129.1/2787.1	1152.3/1631.2/1055.2	3129.1	1152.3	-1.4405	552940	262650	3.8573	5.7328e-05	0.99994	0.00011466	0.0023062	FALSE
SUMO2_4	SUMO2	2703/1712.8/1756.6	307.46/452.7/57.818	1756.6	307.46	-2.5104	448850	141650	3.8568	5.7441e-05	0.99994	0.00011488	0.0023062	FALSE
MPDU1_15	MPDU1	1797.5/2463.6/3014.8	725.32/624.75/818.12	2463.6	725.32	-1.7627	373770	203380	3.8546	5.7961e-05	0.99994	0.00011592	0.0023194	FALSE
MED26_4	MED26	3010.4/3309.7/3268.7	1049.2/1944.1/1246.9	3268.7	1246.9	-1.3896	34176	275200	3.8539	5.8129e-05	0.99994	0.00011626	0.0023223	FALSE
VPS29_3	VPS29	308.39/511.05/901.25	0/294.63/0	511.05	0	-9.0001	96663	37823	3.8466	5.989e-05	0.99994	0.00011978	0.0023771	FALSE
GMPPB_11	GMPPB	1672.1/1559.2/1263.8	155.1/208.61/597.45	1559.2	208.61	-2.896	50005	124690	3.8444	6.0415e-05	0.99994	0.00012083	0.0023817	FALSE
C21orf59_15	C21orf59	2121.5/1316.7/2077	499.06/1086/412.43	2077	499.06	-2.055	290020	169440	3.8342	6.2984e-05	0.99994	0.00012597	0.0024718	FALSE
LSM7_6	LSM7	267.27/500.27/510.58	0/0/517.47	500.27	0	-8.9694	27198	36971	3.827	6.4849e-05	0.99994	0.0001297	0.0025327	FALSE
USP9X_4	USP9X	2188.1/1637.3/1622.6	560.18/254.84/106	1637.3	254.84	-2.6789	151780	131390	3.8256	6.5222e-05	0.99993	0.00013044	0.0025432	FALSE
GTF2A2_4	GTF2A2	2461.2/2489.7/2021.7	742.65/503.24/1438.7	2461.2	742.65	-1.7273	96991	203170	3.8128	6.8697e-05	0.99993	0.00013739	0.0026657	FALSE
RAB10_6	RAB10	2536.6/2182.5/1987	572.96/173.12/1257.5	2182.5	572.96	-1.9276	81797	178660	3.8083	6.996e-05	0.99993	0.00013992	0.0026936	FALSE
TAF2_13	TAF2	2049.1/1055.3/1697.6	298.34/448.4/71.308	1697.6	298.34	-2.5045	268010	136560	3.7936	7.4254e-05	0.99993	0.00014851	0.0028454	FALSE
WDR7_13	WDR7	1845.4/1561.9/1002.4	242.69/40.861/228.38	1561.9	228.38	-2.7684	196700	124920	3.7887	7.5725e-05	0.99992	0.00015145	0.0028927	FALSE
EXOC1_14	EXOC1	1623.2/1861/1387.5	263.67/101.08/462.54	1623.2	263.67	-2.6175	56051	130170	3.7787	7.8821e-05	0.99992	0.00015764	0.0030016	FALSE
RNMT_2	RNMT	1739.7/1547.5/1791.2	328.45/177.42/968.44	1739.7	328.45	-2.4015	19797	140190	3.7744	8.0205e-05	0.99992	0.00016041	0.0030448	FALSE
AP2M1_9	AP2M1	3793.7/4267.1/3801.7	1656.8/1309.7/1881	3801.7	1656.8	-1.1977	108320	323460	3.7713	8.1186e-05	0.99992	0.00016237	0.0030583	FALSE
GTF2H3_13	GTF2H3	1179.7/641.28/1217	124.99/73.12/0	1179.7	73.12	-3.9936	145650	92533	3.7602	8.4878e-05	0.99992	0.00016976	0.003168	FALSE
STK11_2	STK11	3300.2/1526.9/3308	1321.1/1328/757.41	3300.2	1321.1	-1.3202	1572500	278040	3.7534	8.7231e-05	0.99991	0.00017446	0.0032262	FALSE
SCAP_3	SCAP	3235.6/2579.5/2516.4	578.43/890.34/845.1	2579.5	845.1	-1.6087	217250	213630	3.7525	8.7547e-05	0.99991	0.00017509	0.0032305	FALSE
CSNK1A1_3	CSNK1A1	2111.7/2470.8/3926.3	991.73/761.31/776.68	2470.8	776.68	-1.6683	1123700	204020	3.7508	8.8152e-05	0.99991	0.0001763	0.0032455	FALSE
RPL23A_1	RPL23A	456.22/540.69/429.08	235.39/0/0	456.22	0	-8.8367	3935.7	33501	3.7452	9.0137e-05	0.99991	0.00018027	0.0032938	FALSE
MGAT1_3	MGAT1	1404.9/2134.9/2664.4	696.12/572.06/554.09	2134.9	572.06	-1.8981	406650	174500	3.7417	9.1392e-05	0.99991	0.00018278	0.0033247	FALSE
KMT2D_10	KMT2D	1506.7/1051.7/1512.1	273.71/140.86/216.82	1506.7	216.82	-2.7912	103510	120210	3.7386	9.2532e-05	0.99991	0.00018506	0.0033583	FALSE
MED20_14	MED20	2512.1/1435.2/2938.9	1432.4/808.62/589.74	2512.1	808.62	-1.6342	670910	207670	3.7382	9.2664e-05	0.99991	0.00018533	0.0033583	FALSE
IPO9_2	IPO9	1489.1/1613.1/2285	275.53/80.647/761.27	1613.1	275.53	-2.5452	233410	129310	3.729	9.6126e-05	0.9999	0.00019225	0.0034659	FALSE
MED20_1	MED20	1809.2/455.36/2281.2	139.59/654.85/387.38	1809.2	387.38	-2.2206	1027800	146190	3.7215	9.9013e-05	0.9999	0.00019803	0.0035438	FALSE
STT3A_4	STT3A	1541.9/1120.9/1628.2	415.12/240.87/135.87	1541.9	240.87	-2.6734	92365	123220	3.7204	9.9463e-05	0.9999	0.00019893	0.0035444	FALSE
CABIN1_3	CABIN1	1466.6/1934.6/1702.2	327.53/233.34/1115.9	1702.2	327.53	-2.3742	54772	136960	3.7199	9.966e-05	0.9999	0.00019932	0.0035462	FALSE
ARPC3_12	ARPC3	2760.8/2873.2/2406.8	1683.3/979.59/910.63	2760.8	979.59	-1.4939	68989	229730	3.7163	0.00010109	0.9999	0.00020217	0.003591	FALSE
PRMT1_2	PRMT1	929.08/325.13/890.94	19.159/1.0753/151.29	890.94	19.159	-5.4674	160800	68534	3.716	0.00010121	0.9999	0.00020243	0.003591	FALSE
DCPS_7	DCPS	1084.7/1914/2451.7	616.75/388.18/450.98	1914	450.98	-2.083	488400	155260	3.7143	0.00010186	0.9999	0.00020373	0.0036021	FALSE
ARPC3_1	ARPC3	1025/573.92/1091.4	396.87/0/40.472	1025	40.472	-4.6288	103950	79619	3.7141	0.00010197	0.9999	0.00020394	0.0036021	FALSE
DHRSX_3	DHRSX	394.54/435.6/563.98	0/211.83/0	435.6	0	-8.7702	9083.6	31884	3.7057	0.00010542	0.99989	0.00021084	0.0036972	FALSE
PIK3C3_4	PIK3C3	1472.4/2042.4/1801.6	650.51/13.979/390.27	1801.6	390.27	-2.2038	83163	145530	3.7022	0.00010685	0.99989	0.0002137	0.0037367	FALSE
CCDC115_15	CCDC115	1804.3/1404.7/1561.7	187.03/258.07/444.23	1561.7	258.07	-2.5926	41752	124910	3.7001	0.00010777	0.99989	0.00021553	0.003758	FALSE
ELP5_2	ELP5	933.97/650.26/810.37	137.77/1.0753/12.527	810.37	12.527	-5.9064	20457	61927	3.6979	0.0001087	0.99989	0.00021741	0.0037745	FALSE
GAPDH_4	GAPDH	1790.6/2162.7/2084.5	363.12/561.3/1072.5	2084.5	561.3	-1.891	46244	170100	3.6937	0.00011051	0.99989	0.00022102	0.0038209	FALSE
NHLRC2_3	NHLRC2	426.85/125.74/427.2	0/105.38/0	426.85	0	-8.741	45333	31200	3.6886	0.00011273	0.99989	0.00022546	0.0038866	FALSE
TAF8_10	TAF8	1971.7/1980.4/3135.6	501.79/322.59/685.14	1980.4	501.79	-1.9785	667290	161030	3.6856	0.00011408	0.99989	0.00022816	0.0039277	FALSE
ATP6AP2_11	ATP6AP2	539.43/423.03/244.52	0/0/33.727	423.03	0	-8.728	22708	30901	3.6812	0.00011609	0.99988	0.00023217	0.0039855	FALSE
GDI2_10	GDI2	1990.3/1914.9/2453.6	212.58/635.5/512.65	1990.3	512.65	-1.9549	110160	161890	3.6733	0.0001197	0.99988	0.00023941	0.0040924	FALSE
AXIN1_4	AXIN1	2676.6/2598.3/3162.8	624.96/1395.7/947.25	2676.6	947.25	-1.4976	121250	222240	3.6684	0.00012205	0.99988	0.0002441	0.0041551	FALSE
EXOC2_9	EXOC2	958.45/1529.5/1202.9	101.27/161.29/25.054	1202.9	101.27	-3.5573	83226	94481	3.6649	0.00012371	0.99988	0.00024741	0.004194	FALSE
PIK3C3_2	PIK3C3	1508.7/1326.6/1325.6	0/154.84/481.81	1326.6	154.84	-3.0906	16578	104900	3.657	0.00012759	0.99987	0.00025519	0.00429	FALSE
DNLZ_7	DNLZ	1233.5/1753.2/692.33	116.78/0/169.6	1233.5	116.78	-3.3898	281470	97057	3.6498	0.0001312	0.99987	0.00026241	0.0043993	FALSE
DNLZ_11	DNLZ	1739.7/1034.7/1585.1	289.22/652.7/100.22	1585.1	289.22	-2.4503	163460	126910	3.6459	0.00013323	0.99987	0.00026646	0.0044612	FALSE
CSNK1A1_6	CSNK1A1	1341.2/1585.2/1640.4	136.85/335.49/290.05	1585.2	290.05	-2.4463	31288	126920	3.6436	0.00013442	0.99987	0.00026883	0.0044885	FALSE
CCDC115_6	CCDC115	1907.1/2325.3/2311.2	723.5/681.74/1329.8	2311.2	723.5	-1.6742	81744	189950	3.643	0.00013475	0.99987	0.0002695	0.0044935	FALSE
ATXN7L3_2	ATXN7L3	1419.6/1091.3/1009.9	98.534/2.1506/68.417	1091.3	68.417	-3.9759	57202	85133	3.6409	0.00013585	0.99986	0.0002717	0.004524	FALSE
CCT6A_3	CCT6A	543.35/401.47/189.24	0/0/76.127	401.47	0	-8.6527	32585	29220	3.6384	0.00013717	0.99986	0.00027435	0.0045557	FALSE
EEFSEC_2	EEFSEC	1739.7/1770.3/1217	379.54/239.79/528.07	1739.7	379.54	-2.1936	137090	140190	3.6358	0.00013854	0.99986	0.00027707	0.0045947	FALSE
CEBPA_13	CEBPA	1953.1/1504.4/1207.6	249.98/269.9/210.07	1504.4	249.98	-2.5845	144720	120010	3.6337	0.00013968	0.99986	0.00027937	0.0046265	FALSE
UBA3_11	UBA3	412.16/396.08/112.42	0/0/374.85	396.08	0	-8.6333	40361	28801	3.6275	0.00014307	0.99986	0.00028614	0.0047067	FALSE
VPS29_15	VPS29	2035.4/1328.4/2997	559.27/416.14/811.37	2035.4	559.27	-1.8618	712270	165810	3.6255	0.00014422	0.99986	0.00028844	0.0047361	FALSE
MSTO1_13	MSTO1	2867.5/3374.3/4390.1	594.85/1800/1445.4	3374.3	1445.4	-1.2225	644270	284730	3.6149	0.00015023	0.99985	0.00030045	0.0048893	FALSE
UBE2G2_12	UBE2G2	1467.5/1555.6/970.57	237.21/91.4/450.98	1467.5	237.21	-2.6241	127360	116870	3.6136	0.00015096	0.99985	0.00030192	0.0049067	FALSE
TAF8_2	TAF8	1576.2/1101.1/1694.8	579.34/257/296.8	1576.2	296.8	-2.405	119870	126150	3.6098	0.00015321	0.99985	0.00030643	0.0049667	FALSE
SNAPC3_8	SNAPC3	1674.1/1006.8/1258.2	56.566/137.64/326.67	1258.2	137.64	-3.1831	118090	99131	3.6085	0.00015397	0.99985	0.00030793	0.0049713	FALSE
GTF2A2_14	GTF2A2	1130.8/537.09/859.09	148.71/2.1506/23.127	859.09	23.127	-5.1558	88742	65917	3.6065	0.00015521	0.99984	0.00031041	0.0049981	FALSE
AXIN1_5	AXIN1	1387.3/2228.3/2691.6	1151.4/688.19/637.92	2228.3	688.19	-1.6936	460980	182680	3.6035	0.00015696	0.99984	0.00031391	0.0050378	FALSE
NOP16_14	NOP16	383.77/260.46/520.89	0/0/10.6	383.77	0	-8.5879	17003	27845	3.6025	0.0001576	0.99984	0.0003152	0.0050419	FALSE
MBTPS1_9	MBTPS1	1224.7/915.21/581.78	278.27/0/32.763	915.21	32.763	-4.7622	103490	70533	3.5963	0.00016138	0.99984	0.00032275	0.005156	FALSE
EXOC2_4	EXOC2	2153.8/1561/1742.5	428.81/154.84/397.98	1742.5	397.98	-2.1276	101060	140430	3.5905	0.000165	0.99983	0.00033001	0.0052404	FALSE
KDM6A_15	KDM6A	2541.5/962.81/2991.3	864/1347.3/896.17	2541.5	896.17	-1.5028	1347300	210270	3.5882	0.00016652	0.99983	0.00033303	0.0052719	FALSE
GAGE1_6	GAGE1	963.34/1684.9/970.57	7.2988/45.162/302.58	970.57	45.162	-4.3955	255180	75105	3.586	0.00016787	0.99983	0.00033574	0.0052941	FALSE
KDM6A_2	KDM6A	1469.5/3049.2/3615.3	1238.1/973.14/1328.8	3049.2	1238.1	-1.2997	1408000	255490	3.5832	0.0001697	0.99983	0.0003394	0.005337	FALSE
CCT6A_6	CCT6A	373.98/389.8/162.07	0/0/173.45	373.98	0	-8.5507	22577	27086	3.5823	0.00017029	0.99983	0.00034059	0.0053424	FALSE
STX4_2	STX4	2097/1702.9/2175.4	552.89/617.22/1243.1	2097	617.22	-1.7628	80742	171190	3.5769	0.00017387	0.99983	0.00034774	0.0054067	FALSE
C6orf62_10	C6orf62	370.06/0/376.61	0/0/267.89	370.06	0	-8.5355	68495	26783	3.5742	0.00017568	0.99982	0.00035136	0.005456	FALSE
ATP6V0D1_15	ATP6V0D1	1482.2/1878.9/1879.3	485.37/421.52/712.12	1878.9	485.37	-1.9505	78689	152220	3.5729	0.00017654	0.99982	0.00035307	0.0054686	FALSE
GPN2_7	GPN2	2010.9/1499.9/1609.5	329.36/849.48/239.94	1609.5	329.36	-2.2854	86559	129000	3.5696	0.00017876	0.99982	0.00035752	0.0055164	FALSE
MBTPS1_6	MBTPS1	3207.2/1773.8/1693.8	419.68/425.82/1072.5	1773.8	425.82	-2.056	1030500	143130	3.5651	0.00018188	0.99982	0.00036377	0.0055987	FALSE
CDIPT_3	CDIPT	1364.7/981.68/1235.7	139.59/189.25/0	1235.7	139.59	-3.1369	40589	97238	3.5638	0.00018276	0.99982	0.00036553	0.0056187	FALSE
GMPPB_13	GMPPB	2113.7/2266.9/1306	463.47/633.35/926.05	2113.7	633.35	-1.7371	337950	172650	3.563	0.00018334	0.99982	0.00036668	0.0056223	FALSE
EXOC8_2	EXOC8	1982.5/1838.5/1950.5	533.73/187.1/536.74	1950.5	533.73	-1.8677	6783.6	158430	3.5601	0.00018534	0.99981	0.00037067	0.0056601	FALSE
GTF2H3_3	GTF2H3	330.9/454.46/358.81	0/0/116.6	358.81	0	-8.4911	4964	25913	3.5505	0.00019223	0.99981	0.00038445	0.0058072	FALSE
INTS6_10	INTS6	319.16/529.01/358.81	0/0/0	358.81	0	-8.4911	15270	25913	3.5505	0.00019223	0.99981	0.00038445	0.0058072	FALSE
CEBPA_6	CEBPA	1929.6/2947.7/1489.6	926.04/327.96/525.18	1929.6	525.18	-1.8754	615080	156620	3.5496	0.00019293	0.99981	0.00038586	0.0058072	FALSE
HSD17B10_10	HSD17B10	3478.4/2845.3/3490.7	1165.1/2160.3/1553.4	3478.4	1553.4	-1.1625	200470	294130	3.5496	0.00019294	0.99981	0.00038588	0.0058072	FALSE
COMMD10_9	COMMD10	667.68/905.33/397.22	139.59/8.6024/0	667.68	8.6024	-6.1218	64813	50342	3.5485	0.00019371	0.99981	0.00038743	0.0058131	FALSE
ALG2_10	ALG2	1134.7/2233.7/1786.6	363.12/548.4/440.38	1786.6	440.38	-2.0179	312450	144230	3.5464	0.00019529	0.9998	0.00039058	0.0058348	FALSE
GAPDH_9	GAPDH	356.36/569.43/333.52	0/0/0	356.36	0	-8.4812	22960	25723	3.5453	0.00019605	0.9998	0.00039211	0.0058505	FALSE
SETDB1_12	SETDB1	1967.8/1186.5/2104.2	1224.4/77.421/551.19	1967.8	551.19	-1.8341	314550	159930	3.5428	0.00019793	0.9998	0.00039586	0.0058992	FALSE
AP2M1_14	AP2M1	2825.4/1792.7/2221.3	50.179/710.77/920.26	2221.3	710.77	-1.6425	274330	182060	3.5402	0.00019992	0.9998	0.00039984	0.0059441	FALSE
VPS72_6	VPS72	2800.9/1005/2307.4	890.46/766.68/422.07	2307.4	766.68	-1.5883	969920	189630	3.5383	0.00020134	0.9998	0.00040268	0.0059644	FALSE
POLR2L_9	POLR2L	884.04/1638.2/1539.2	301.08/847.33/163.82	1539.2	301.08	-2.3502	219540	122990	3.538	0.00020161	0.9998	0.00040322	0.0059652	FALSE
HAVCR1_7	HAVCR1	2779.4/2645.9/3092.5	1080.2/1358.1/1033	2779.4	1080.2	-1.3626	57928	231380	3.5324	0.00020588	0.99979	0.00041176	0.0060695	FALSE
FNDC3B_3	FNDC3B	1283.5/2056.8/1157	52.916/396.78/170.56	1283.5	170.56	-2.9044	306980	101260	3.5304	0.00020749	0.99979	0.00041497	0.0060956	FALSE
CTR9_4	CTR9	3052.5/3216.3/2204.4	1225.3/1318.3/1268.1	3052.5	1268.1	-1.2666	373080	255780	3.5282	0.00020916	0.99979	0.00041832	0.0061218	FALSE
ACTR3_6	ACTR3	2268.4/1242.1/2043.3	605.8/903.25/474.1	2043.3	605.8	-1.7523	346230	166500	3.5231	0.00021325	0.99979	0.00042649	0.006219	FALSE
OSTC_10	OSTC	1537/999.64/1228.2	138.68/702.17/147.43	1228.2	147.43	-3.0498	73812	96607	3.5215	0.00021453	0.99979	0.00042907	0.0062491	FALSE
GAPDH_6	GAPDH	350.48/238.01/342.89	423.33/0/0	342.89	0	-8.4258	5528.4	24685	3.5165	0.00021863	0.99978	0.00043727	0.006361	FALSE
ASH2L_11	ASH2L	1567.4/554.16/1343.4	90.323/204.31/206.22	1343.4	204.31	-2.7112	336560	106330	3.5154	0.00021955	0.99978	0.00043909	0.0063799	FALSE
DCPS_2	DCPS	1917.9/368.24/1719.1	412.38/667.76/388.34	1719.1	412.38	-2.0569	932180	138420	3.5146	0.00022021	0.99978	0.00044042	0.0063916	FALSE
OSTC_1	OSTC	2141.1/2905.5/1840.9	671.49/501.09/1404	2141.1	671.49	-1.6714	337230	175040	3.5128	0.00022172	0.99978	0.00044344	0.0064261	FALSE
TAF7_3	TAF7	2495.5/2261.5/3515	900.49/1200/439.41	2495.5	900.49	-1.4695	547110	206200	3.5125	0.00022192	0.99978	0.00044385	0.0064261	FALSE
CDC73_5	CDC73	544.33/318.84/337.26	0/0/143.58	337.26	0	-8.402	21607	24252	3.5043	0.00022889	0.99977	0.00045778	0.0066199	FALSE
INTS1_14	INTS1	3274.8/2433.1/1823.1	850.31/1135.5/866.3	2433.1	866.3	-1.4888	540270	200690	3.4975	0.00023486	0.99977	0.00046972	0.0067367	FALSE
GDI2_15	GDI2	2101/1567.3/2041.4	428.81/617.22/998.32	2041.4	617.22	-1.7241	114170	166340	3.4922	0.0002395	0.99976	0.000479	0.0068376	FALSE
GDI2_12	GDI2	1292.3/1602.3/991.18	431.54/95.701/185.98	1292.3	185.98	-2.7901	93385	102010	3.4914	0.00024022	0.99976	0.00048043	0.0068501	FALSE
C11orf57_5	C11orf57	328.95/88.917/493.72	8.2112/0/0	328.95	0	-8.3661	42382	23613	3.4861	0.00024505	0.99975	0.0004901	0.0069717	FALSE
EXOC8_1	EXOC8	2605.1/2122.3/3097.2	612.19/987.12/1197.8	2605.1	987.12	-1.3992	237620	215900	3.4822	0.00024864	0.99975	0.00049727	0.0070633	FALSE
CHMP1A_2	CHMP1A	1896.3/1699.3/2232.5	531.9/246.24/621.54	1896.3	531.9	-1.832	75916	153730	3.4807	0.00025009	0.99975	0.00050017	0.0070901	FALSE
RPUSD4_3	RPUSD4	3794.6/2477.1/3443.8	3062.8/1566.7/1554.3	3443.8	1566.7	-1.1358	528830	291000	3.4798	0.00025093	0.99975	0.00050187	0.0071059	FALSE
CDIPT_14	CDIPT	1555.6/1558.3/2876.1	332.1/345.17/219.71	1558.3	332.1	-2.2269	868340	124610	3.4789	0.00025174	0.99975	0.00050347	0.0071122	FALSE
FNDC3B_10	FNDC3B	1905.1/1957.1/2211	571.13/703.24/569.5	1957.1	571.13	-1.775	33578	159000	3.4762	0.0002543	0.99975	0.0005086	0.0071639	FALSE
UXT_5	UXT	1387.3/949.34/1123.3	70.251/113.98/208.14	1123.3	113.98	-3.2895	49969	87808	3.476	0.00025445	0.99975	0.0005089	0.0071639	FALSE
hsa-mir-6511a-4_2	hsa-mir-6511a-4	1053.4/2378.3/2161.3	1609.4/701.09/681.28	2161.3	701.09	-1.6228	637250	176810	3.4728	0.00025752	0.99974	0.00051505	0.0072172	FALSE
CEBPA_3	CEBPA	908.52/559.55/556.49	5.4741/0/357.51	559.55	5.4741	-6.436	60896	41674	3.4701	0.00026016	0.99974	0.00052032	0.0072743	FALSE
GET4_7	GET4	2115.6/2905.5/2081.7	738.09/674.21/519.39	2115.6	674.21	-1.6484	312530	172820	3.4675	0.00026262	0.99974	0.00052523	0.0073306	FALSE
AXIN1_7	AXIN1	2975.2/3666.2/3133.7	1357.6/1740.9/620.58	3133.7	1357.6	-1.2062	154340	263070	3.463	0.00026711	0.99973	0.00053422	0.0074099	FALSE
HYOU1_6	HYOU1	2566/2794.1/2566	772.76/969.92/1008.9	2566	969.92	-1.4027	26019	212440	3.463	0.00026713	0.99973	0.00053426	0.0074099	FALSE
GPN2_3	GPN2	2062.8/1908.6/1927.1	897.75/216.13/557.94	1927.1	557.94	-1.7864	9376	156400	3.4626	0.00026747	0.99973	0.00053494	0.0074108	FALSE
CABIN1_15	CABIN1	1738.7/2824.7/1232.9	443.4/670.98/279.45	1738.7	443.4	-1.9689	717580	140110	3.4623	0.00026781	0.99973	0.00053563	0.0074119	FALSE
GFER_15	GFER	1942.4/3692.3/3185.3	1653.2/1083.9/1394.4	3185.3	1394.4	-1.1912	900960	267700	3.4614	0.00026869	0.99973	0.00053738	0.0074277	FALSE
ZBTB8OS_10	ZBTB8OS	863.48/1235/1334.1	512.74/167.75/124.31	1235	167.75	-2.8727	73906	97175	3.4582	0.00027188	0.99973	0.00054376	0.007502	FALSE
NELFB_14	NELFB	1101.4/1513.4/1658.2	313.85/894.64/232.23	1513.4	313.85	-2.266	95359	120780	3.4581	0.00027199	0.99973	0.00054398	0.007502	FALSE
CCDC22_14	CCDC22	1938.4/3202.8/2337.4	1200.7/821.52/161.89	2337.4	821.52	-1.5074	454030	192260	3.4573	0.00027285	0.99973	0.00054571	0.0075173	FALSE
SCAP_5	SCAP	2866.5/3253.1/3014.8	1629.5/303.23/1279.7	3014.8	1279.7	-1.2356	39386	252400	3.4536	0.00027657	0.99972	0.00055314	0.007594	FALSE
USP39_4	USP39	236.92/310.76/615.51	0/0/0	310.76	0	-8.2843	49162	22220	3.4455	0.00028499	0.99972	0.00056999	0.007799	FALSE
SUMO2_1	SUMO2	1174.8/705.05/1288.2	484.46/61.292/143.58	1174.8	143.58	-3.0237	116760	92122	3.4449	0.00028564	0.99971	0.00057128	0.0077992	FALSE
EXOC1_4	EXOC1	2044.2/3524.3/2855.5	943.37/1175.3/1256.6	2855.5	1175.3	-1.28	552800	238170	3.4429	0.00028776	0.99971	0.00057553	0.0078396	FALSE
TAF10_13	TAF10	2548.4/1452.3/2009.5	617.66/967.76/434.6	2009.5	617.66	-1.7004	300420	163560	3.4419	0.00028885	0.99971	0.0005777	0.0078555	FALSE
TRIAP1_3	TRIAP1	3440.2/3028.6/2789	1108.5/1492.5/1296.1	3028.6	1296.1	-1.2238	113440	253630	3.44	0.00029081	0.99971	0.00058162	0.0078962	FALSE
HNRNPU_4	HNRNPU	745.03/1225.1/1023	63.865/84.948/540.59	1023	84.948	-3.5747	59055	79454	3.4359	0.00029533	0.9997	0.00059066	0.0079835	FALSE
CDIPT_2	CDIPT	3730/3149.8/3065.4	1383.1/423.67/1409.8	3149.8	1383.1	-1.1867	171890	264510	3.4351	0.00029619	0.9997	0.00059237	0.0079977	FALSE
C16orf62_5	C16orf62	1853.3/1168.5/1922.4	441.58/603.24/527.1	1853.3	527.1	-1.812	236850	150000	3.4249	0.00030752	0.99969	0.00061503	0.0082345	FALSE
LAS1L_6	LAS1L	823.35/1946.3/1970.2	559.27/584.96/623.47	1946.3	584.96	-1.7326	630780	158060	3.4245	0.00030794	0.99969	0.00061588	0.0082345	FALSE
DHX36_5	DHX36	301.53/113.17/529.32	0/0/27.945	301.53	0	-8.241	43684	21515	3.4245	0.00030799	0.99969	0.00061598	0.0082345	FALSE
HYPK_11	HYPK	301.53/68.259/444.06	20.984/0/0	301.53	0	-8.241	37366	21515	3.4245	0.00030799	0.99969	0.00061598	0.0082345	FALSE
CDIPT_6	CDIPT	1484.2/625.11/1115.8	123.17/0/340.16	1115.8	123.17	-3.169	188240	87181	3.424	0.00030848	0.99969	0.00061696	0.0082385	FALSE
COPS6_9	COPS6	584.47/259.56/300.73	0/0/0	300.73	0	-8.2371	41101	21453	3.4226	0.0003101	0.99969	0.0006202	0.0082728	FALSE
SNAPC3_4	SNAPC3	1926.7/907.13/2261.5	460.74/574.21/987.72	1926.7	574.21	-1.7447	575810	156360	3.4208	0.00031221	0.99969	0.00062442	0.0083199	FALSE
CTNNBIP1_1	CTNNBIP1	4761.9/3968/3914.1	2214.3/1703.3/1979.3	3968	1979.3	-1.0031	316570	338610	3.4176	0.00031585	0.99968	0.0006317	0.0084	FALSE
VPS29_10	VPS29	1315.8/597.27/1883.1	220.79/111.83/385.45	1315.8	220.79	-2.5698	419030	103990	3.4141	0.00031995	0.99968	0.00063989	0.008489	FALSE
USP22_10	USP22	559.99/1378.7/1337.8	167.87/1207.6/233.2	1337.8	233.2	-2.5152	303340	105860	3.4112	0.00032338	0.99968	0.00064675	0.0085521	FALSE
UBE2G2_4	UBE2G2	2718.7/1251.1/2601.6	909.62/1018.3/1020.5	2601.6	1018.3	-1.3524	918780	215590	3.41	0.00032482	0.99968	0.00064964	0.0085564	FALSE
DHRSX_14	DHRSX	1702.5/2240.9/2403.9	780.06/990.35/681.28	2240.9	780.06	-1.5212	158220	183780	3.4077	0.00032762	0.99967	0.00065524	0.0086083	FALSE
hsa-mir-6886_7	hsa-mir-6886	2399.5/3114.8/2186.6	863.09/1021.5/887.5	2399.5	887.5	-1.4339	278450	197730	3.4004	0.00033642	0.99966	0.00067284	0.0088207	FALSE
EXOC7_3	EXOC7	1164/2413.3/1733.2	652.33/447.32/464.47	1733.2	464.47	-1.8975	393260	139630	3.3967	0.00034106	0.99966	0.00068211	0.008904	FALSE
NDUFA13_5	NDUFA13	3905.3/3590.8/3546.9	1338.4/1718.3/2167.2	3590.8	1718.3	-1.0629	50408	304300	3.3944	0.00034388	0.99966	0.00068776	0.008949	FALSE
ALG8_2	ALG8	595.24/1410.1/1819.4	279.18/382.8/197.54	1410.1	279.18	-2.3324	415740	111980	3.3892	0.00035053	0.99965	0.00070106	0.009064	FALSE
DARS_12	DARS	270.21/571.22/285.74	0/84.948/0	285.74	0	-8.1636	40871	20312	3.3877	0.00035238	0.99965	0.00070476	0.0090873	FALSE
GDI2_1	GDI2	1608.5/1635.5/2542.6	432.45/27.958/409.54	1635.5	409.54	-1.995	411750	131230	3.3867	0.00035365	0.99965	0.0007073	0.0090965	FALSE
MEF2BNB_1	MEF2BNB	2616.9/1340.9/2163.2	829.33/460.23/739.1	2163.2	739.1	-1.548	440970	176970	3.3853	0.00035555	0.99964	0.00071111	0.0091071	FALSE
STK11_1	STK11	1729.9/2870.5/2455.5	1721.6/402.16/931.83	2455.5	931.83	-1.3969	349340	202660	3.3845	0.0003565	0.99964	0.00071301	0.0091219	FALSE
EXOC3_8	EXOC3	1855.2/1453.2/1212.3	305.64/2.1506/800.77	1453.2	305.64	-2.2456	109830	115650	3.3817	0.00036014	0.99964	0.00072027	0.0091955	FALSE
TCERG1_3	TCERG1	282.93/105.98/718.56	0/0/24.091	282.93	0	-8.1494	110540	20099	3.3811	0.000361	0.99964	0.00072199	0.0092078	FALSE
TAF10_6	TAF10	2033.4/3078.9/3100	1361.2/1904.3/1233.4	3078.9	1361.2	-1.1769	546710	258140	3.3806	0.00036159	0.99964	0.00072318	0.0092134	FALSE
MTA2_6	MTA2	979.01/2072.9/2034.8	660.54/581.73/742.96	2034.8	660.54	-1.6217	558100	165770	3.3756	0.00036823	0.99963	0.00073645	0.0093308	FALSE
STRAP_9	STRAP	743.07/1377.8/1907.4	266.41/276.35/201.4	1377.8	266.41	-2.3663	341690	109240	3.3737	0.00037087	0.99963	0.00074175	0.0093717	FALSE
PPIL2_7	PPIL2	1681/2166.3/2130.4	723.5/870.99/584.92	2130.4	723.5	-1.5567	101640	174110	3.3719	0.00037331	0.99963	0.00074663	0.0094139	FALSE
CEBPA_8	CEBPA	3045.7/2918.1/2551	1051/1253.8/1499.4	2918.1	1253.8	-1.2181	75507	243750	3.371	0.00037452	0.99963	0.00074904	0.0094345	FALSE
KTI12_15	KTI12	607.96/1176.6/946.21	72.076/20.431/856.66	946.21	72.076	-3.6962	83739	73091	3.3676	0.00037919	0.99962	0.00075837	0.0095323	FALSE
STRAP_14	STRAP	2280.1/2257.9/2934.2	823.85/7.5271/840.28	2280.1	823.85	-1.4675	214160	187220	3.3656	0.00038187	0.99962	0.00076375	0.0095802	FALSE
TAF7_14	TAF7	1587/1330.2/1410	287.39/1.0753/419.18	1410	287.39	-2.2906	18852	111970	3.3636	0.00038466	0.99962	0.00076931	0.0096302	FALSE
WBSCR16_15	WBSCR16	930.06/769.71/623.94	589.38/30.108/0	769.71	30.108	-4.6308	23480	58611	3.3615	0.00038759	0.99961	0.00077518	0.0096641	FALSE
GTF2A2_2	GTF2A2	1700.5/1252.9/1089.6	204.37/126.88/263.07	1252.9	204.37	-2.6102	113530	98687	3.3605	0.00038899	0.99961	0.00077798	0.0096789	FALSE
DCPS_4	DCPS	1764.2/2373.8/2795.5	907.79/197.85/888.46	2373.8	888.46	-1.4168	274760	195460	3.3597	0.00039017	0.99961	0.00078034	0.0096789	FALSE
[truncated: 11,870 more rows]

## Sheet: LP-depl_gRNA
sgrna	Gene	control_count	treatment_count	control_mean	treat_mean	LFC	control_var	adj_var	score	p.low	p.high	p.twosided	FDR	high_in_treatment
[truncated: 12,205 more rows]
