# Supplementary material for: Genome-scale CRISPR screening for modifiers of cellular LDL uptake
Source: bioRxiv preprint, doi:10.1101/2020.07.01.182246, version 1 (2020-07-01)
Supplement: Supplemental Table 5 [file 182246_file18.xlsx]

## Sheet: annotation
Orthogonal screen of transferrin uptake in HuH7 cells cultured under lipoprotein-rich conditions
Output files from MAGeCK analysis
control = transferrinlow sorted cells
treatment = transferrinhigh sorted cells
Gene-level analysis
id	gene ID
num	number of individual gRNAs detected for a given gene
neg|score	MAGeCK significance score for depletion in transferrinhigh cells (low score indicates gene disruption reduces transferrin uptake)
neg|p-value	p-value for depletion in transferrinhigh cells (gene disruption reduces transferrin uptake)
neg|fdr	FDR for depletion in transferrinhigh cells (gene disruption reduces transferrin uptake)
neg|rank	gene rank for depletion in transferrinhigh cells (gene disruption reduces transferrin uptake)
neg|goodsgrna	number of gene-targeting gRNA with significant depletion in transferrinhigh cells gene disruption reduces transferrin uptake)
neg|lfc	composite log2 fold change of gene-targeting gRNA (negative value indicates gene disruption reduces transferrin uptake)
pos|score	MAGeCK significance score for enrichment in transferrinhigh cells (low score indicates gene disruption increases transferrin uptake)
pos|p-value	p-value for enrichment in transferrinhigh cells (gene disruption increases transferrin uptake)
pos|fdr	FDR for enrichment in transferrinhigh cells (gene disruption increases transferrin uptake)
pos|rank	gene rank for enrichment in transferrinhigh cells (gene disruption increases transferrin uptake)
pos|goodsgrna	number of gene-targeting gRNA with significant enrichment in transferrinhigh cells (gene disruption increases transferrin uptake)
pos|lfc	composite log2 fold change of gene-targeting gRNA (positive value indicates gene disruption increases transferrin uptake)
gRNA-level analysis
sgrna	GeCKO library gRNA identifier
gene	targeted gene
control_count	individual replicate normalized read counts in transferrinlow cells
treatment_count	individual replicate normalized read counts in transferrinhigh cells
control_mean	mean normalized read counts in transferrinlow cells
treat_mean	mean normalized read counts in transferrinhigh cells
LFC	log2 fold change of normalized read counts in transferrinhigh relative to transferrinlow cells
control_var	raw variance in transferrinlow cells
adj_var	adjusted variance in transferrinlow cells
score	MAGeCK significance score for individual gRNA
p.low	p-value for depletion in transferrinhigh cells (gene disruption reduces transferrin uptake)
p.high	p-value for enrichment in transferrinhigh cells (gene disruption increases transferrin uptake)
p.twosided	minimum p-value for either enrichment or depletion
FDR	FDR for p.twosided
high_in_treatment	YES if normalized read counts for gRNA are higher in transferrinhigh than transferrinlow cells (gene disruption increases transferrin uptake)

## Sheet: Tf_uptake_gene
id	num	neg|score	neg|p-value	neg|fdr	neg|rank	neg|goodsgrna	neg|lfc	pos|score	pos|p-value	pos|fdr	pos|rank	pos|goodsgrna	pos|lfc
TFRC	15	5.183e-35	2.8256e-06	0.00099	1	15	-5.1923	1	1	0.999997	1752	0	-5.1923
FNDC3B	15	1.2842e-20	2.8256e-06	0.00099	2	15	-3.0008	1	1	0.999997	1751	0	-3.0008
MED12	15	2.6297e-10	2.8256e-06	0.00099	3	13	-1.3154	0.99997	0.99997	0.999997	1746	0	-1.3154
VPS29	15	4.8377e-09	2.8256e-06	0.00099	4	14	-2.3093	1	1	0.999997	1750	0	-2.3093
USP22	15	2.2824e-08	2.8256e-06	0.00099	5	14	-1.0979	1	1	0.999997	1749	0	-1.0979
WRB	15	9.6565e-08	8.4769e-06	0.002122	6	14	-1.2895	0.99976	0.99982	0.999997	1742	0	-1.2895
PTPMT1	15	1.3283e-07	8.4769e-06	0.002122	7	12	-1.6489	0.98395	0.9876	0.999997	1715	1	-1.6489
CSNK1A1	15	1.3432e-06	3.1082e-05	0.006807	8	11	-1.1793	0.87868	0.95227	0.999997	1600	1	-1.1793
GNB1L	15	1.9326e-06	3.6733e-05	0.007151	9	11	-0.83379	0.92128	0.96574	0.999997	1645	1	-0.83379
GIGYF2	15	2.8972e-06	4.2384e-05	0.007426	10	11	-1.0443	0.074686	0.24385	0.987471	236	2	-1.0443
GNB2L1	15	4.5795e-06	7.6292e-05	0.011139	11	11	-1.6757	0.911	0.96217	0.999997	1632	1	-1.6757
POLR3H	15	4.6739e-06	7.6292e-05	0.011139	12	13	-1.4401	0.99989	0.99992	0.999997	1743	0	-1.4401
WDR82	14	6.3471e-06	9.3246e-05	0.011669	13	11	-1.4271	0.99999	1	0.999997	1747	0	-1.4271
DYRK1A	15	6.5171e-06	8.7594e-05	0.011669	14	10	-1.0911	0.99712	0.99719	0.999997	1735	0	-1.0911
STT3A	15	1.2498e-05	0.0001328	0.015512	15	12	-1.0525	1	1	0.999997	1748	0	-1.0525
PGS1	15	1.4374e-05	0.00015541	0.017017	16	12	-0.7155	0.090119	0.27995	0.987471	279	2	-0.7155
CDIPT	15	2.3941e-05	0.00025713	0.0265	17	12	-0.88783	0.99475	0.99467	0.999997	1728	0	-0.88783
UBE2G2	15	3.3331e-05	0.00036451	0.035479	18	12	-0.96036	0.9655	0.98218	0.999997	1700	1	-0.96036
SRP14	15	3.8332e-05	0.00039841	0.036738	19	8	-1.3476	0.9794	0.98589	0.999997	1711	1	-1.3476
PROX1	15	4.5169e-05	0.00044927	0.039356	20	12	-0.90437	0.93694	0.97184	0.999997	1671	1	-0.90437
ARPC4	15	4.6552e-05	0.00047188	0.039368	21	10	-0.78525	0.95747	0.98064	0.999997	1696	1	-0.78525
VPS35	15	7.1284e-05	0.00064707	0.048886	22	10	-1.186	0.87955	0.95246	0.999997	1603	1	-1.186
MSTO1	15	7.2057e-05	0.00065837	0.048886	23	10	-0.98388	0.84049	0.94069	0.999997	1548	2	-0.98388
TAF2	14	7.5577e-05	0.00066967	0.048886	24	11	-1.1256	0.9786	0.98276	0.999997	1709	1	-1.1256
SAP130	15	0.00010046	0.00081095	0.056832	25	10	-0.84182	0.99267	0.9928	0.999997	1725	1	-0.84182
HSPE1	14	0.00011931	0.0010483	0.068023	26	8	-0.96743	0.87007	0.94291	0.999997	1585	2	-0.96743
ZNF143	15	0.00012594	0.00096354	0.064928	27	11	-0.88547	0.89963	0.95836	0.999997	1623	2	-0.88547
SRP19	14	0.00014951	0.0012122	0.075849	28	10	-1.0958	0.028783	0.1175	0.939984	135	3	-1.0958
SRP9	15	0.00018999	0.00141	0.085183	29	11	-0.7911	0.99738	0.99745	0.999997	1736	0	-0.7911
CHP1	15	0.00020056	0.0014948	0.087294	30	11	-0.73319	0.99798	0.998	0.999997	1740	0	-0.73319
HNF4A	15	0.00023677	0.0018508	0.104599	31	9	-0.97662	0.99532	0.99523	0.999997	1731	0	-0.97662
DHX36	15	0.00025615	0.0020203	0.110613	32	11	-0.66084	0.98145	0.98656	0.999997	1713	1	-0.66084
GAPDH	15	0.00028689	0.0023029	0.122262	33	6	0.47547	0.015931	0.074633	0.875876	100	7	0.47547
CHMP1A	15	0.00031522	0.0025176	0.129732	34	11	-1.038	0.82528	0.93334	0.999997	1526	3	-1.038
CDC73	15	0.00042298	0.0034049	0.166529	35	7	-0.48537	0.014386	0.068976	0.875876	96	5	-0.48537
PIM2	15	0.00042469	0.0034218	0.166529	36	10	-0.88197	0.9315	0.96966	0.999997	1662	2	-0.88197
IREB2	15	0.00046562	0.0037044	0.171574	37	11	-0.60687	0.44242	0.72722	0.999997	919	2	-0.60687
HYOU1	14	0.00049674	0.0037213	0.171574	38	10	-1.0308	0.65117	0.84752	0.999997	1280	1	-1.0308
KAT7	15	0.00051945	0.004083	0.183422	39	9	-0.97911	0.99741	0.99748	0.999997	1737	0	-0.97911
WBSCR16	15	0.00053621	0.0042356	0.18552	40	9	-0.72	0.8904	0.9555	0.999997	1615	2	-0.72
TMEM258	15	0.00068057	0.0051116	0.218426	41	9	-0.59163	0.054904	0.1953	0.97951	190	2	-0.59163
HTRA2	15	0.00089904	0.0065357	0.266291	42	8	-0.86949	0.8099	0.92603	0.999997	1508	2	-0.86949
ALG8	15	0.00098211	0.0070669	0.273031	43	10	-0.77303	0.97389	0.98416	0.999997	1704	1	-0.77303
SEC61B	15	0.00099903	0.0071347	0.273031	44	10	-0.78471	0.4521	0.73339	0.999997	934	2	-0.78471
CEBPA	15	0.0010043	0.0071686	0.273031	45	7	-0.25025	0.50287	0.76535	0.999997	1027	3	-0.25025
DAP3	15	0.0013347	0.0091748	0.342005	46	9	-0.64503	0.99677	0.99687	0.999997	1733	0	-0.64503
POLRMT	15	0.0014528	0.0098643	0.356139	47	7	-0.50937	0.38391	0.67298	0.999997	814	3	-0.50937
STRAP	15	0.0015031	0.010164	0.356139	48	10	-0.66577	0.08043	0.25747	0.987471	252	3	-0.66577
CDC23	14	0.0018429	0.011707	0.394421	49	7	-0.39364	0.46461	0.72733	0.999997	958	4	-0.39364
TRIAP1	15	0.002144	0.01434	0.474033	50	7	-0.42566	0.57687	0.81157	0.999997	1167	4	-0.42566
GTF3C4	15	0.0024769	0.016465	0.528623	51	9	-0.81962	0.99102	0.99145	0.999997	1720	1	-0.81962
ALG14	15	0.002676	0.017522	0.538562	52	6	-0.27225	0.91829	0.96466	0.999997	1643	2	-0.27225
COG5	15	0.0028007	0.018245	0.541786	53	7	-0.38175	0.43228	0.71962	0.999997	897	3	-0.38175
SETD1A	15	0.0029033	0.018838	0.550083	54	9	-0.58362	0.14575	0.38369	0.999997	384	1	-0.58362
NMT1	13	0.0029125	0.017267	0.538562	55	8	-1.0762	0.91557	0.95957	0.999997	1638	2	-1.0762
ACTR3	14	0.0030721	0.018132	0.541786	56	9	-0.90044	0.057924	0.20004	0.97951	202	2	-0.90044
COMMD2	15	0.003092	0.019816	0.562201	57	10	-0.66537	0.71558	0.88529	0.999997	1378	2	-0.66537
RAB7A	15	0.0032086	0.020602	0.572922	58	7	-0.21572	0.38393	0.673	0.999997	815	2	-0.21572
DPAGT1	13	0.0034118	0.019895	0.562201	59	9	-0.94471	0.42684	0.68835	0.999997	890	2	-0.94471
TOMM22	15	0.0040692	0.024727	0.648663	60	7	-0.36563	0.83785	0.93944	0.999997	1544	3	-0.36563
TMEM165	15	0.0040856	0.024806	0.648663	61	9	-0.5559	0.80852	0.92539	0.999997	1506	2	-0.5559
ATXN7L3	15	0.0042591	0.025597	0.659508	62	7	-0.4185	0.58113	0.81436	0.999997	1171	1	-0.4185
ERCC3	15	0.004422	0.026349	0.669034	63	9	-1.0257	0.68526	0.87348	0.999997	1336	3	-1.0257
SMC1A	15	0.0045317	0.026954	0.669154	64	9	-0.63408	0.92077	0.96553	0.999997	1644	2	-0.63408
CPSF4	15	0.0045733	0.027118	0.669154	65	8	-0.941	0.94398	0.97489	0.999997	1680	2	-0.941
DNAJC17	15	0.0048505	0.028412	0.687548	66	9	-0.82633	0.83544	0.93821	0.999997	1540	1	-0.82633
UBE2I	15	0.0049862	0.029073	0.687548	67	7	-0.48982	0.11393	0.33039	0.999997	330	4	-0.48982
HNRNPU	15	0.0050843	0.029531	0.687548	68	8	-0.71584	0.83031	0.93572	0.999997	1534	1	-0.71584
IRS1	15	0.0052187	0.030175	0.687548	69	7	-0.44023	0.99992	0.99993	0.999997	1744	0	-0.44023
PRPF6	15	0.0052788	0.030503	0.687548	70	5	0.096594	0.014679	0.070095	0.875876	98	7	0.096594
INTS1	15	0.0055656	0.031622	0.701278	71	7	-0.48607	0.59359	0.82211	0.999997	1192	2	-0.48607
CCDC53	15	0.0059009	0.033283	0.720022	72	9	-0.66769	0.5088	0.76897	0.999997	1040	2	-0.66769
SPATA5	14	0.0061301	0.033289	0.720022	73	7	-0.46131	0.17235	0.42214	0.999997	454	3	-0.46131
NonTargeting_Human_0616	1	0.006235	0.0061627	0.257072	74	1	-6.5024	0.99376	0.99388	0.999997	1727	0	-6.5024
TAF1B	15	0.0068612	0.037516	0.7919	75	5	0.09555	0.36369	0.65371	0.999997	785	3	0.09555
OSTC	15	0.0071218	0.03851	0.803218	76	9	-0.48263	0.46044	0.73858	0.999997	951	3	-0.48263
WDR61	15	0.0074053	0.039901	0.81115	77	7	-0.45418	0.8461	0.94329	0.999997	1554	2	-0.45418
MRPS21	14	0.0075747	0.040517	0.81115	78	8	-0.68153	0.68715	0.86372	0.999997	1341	3	-0.68153
CABIN1	15	0.0075894	0.040743	0.81115	79	9	-0.5058	0.99995	0.99997	0.999997	1745	0	-0.5058
RPS14	12	0.0077522	0.039268	0.809377	80	7	-1.0089	0.30232	0.56365	0.999997	687	4	-1.0089
ATP5I	15	0.0087703	0.046151	0.898405	81	7	-0.39342	0.3303	0.62109	0.999997	734	3	-0.39342
DHRSX	15	0.009013	0.047372	0.912034	82	8	-0.56022	0.99771	0.99773	0.999997	1739	0	-0.56022
PPIL2	15	0.0092115	0.048253	0.918564	83	9	-0.55102	0.088416	0.27619	0.987471	273	3	-0.55102
SHC1	15	0.0095888	0.049892	0.918564	84	5	-0.16265	0.01903	0.085947	0.875876	112	3	-0.16265
UBA3	15	0.00973	0.050559	0.918564	85	5	0.27666	0.013253	0.064907	0.875876	90	5	0.27666
NonTargeting_Human_0222	1	0.010116	0.010017	0.356139	86	1	-5.1959	0.98988	0.99005	0.999997	1719	0	-5.1959
GPN1	15	0.010182	0.052429	0.918564	87	5	-0.15018	0.48599	0.75468	0.999997	994	3	-0.15018
EIF3C	14	0.010352	0.051706	0.918564	88	7	-0.46844	0.00012681	0.0010653	0.081145	23	5	-0.46844
FAM57B	15	0.010598	0.054362	0.928837	89	8	-0.53317	0.97659	0.98489	0.999997	1708	1	-0.53317
MRPL28	15	0.010777	0.055136	0.928837	90	9	-0.49414	0.80734	0.92491	0.999997	1502	2	-0.49414
NCBP1	14	0.011228	0.055131	0.928837	91	7	-0.22739	0.14925	0.382	0.999997	400	3	-0.22739
NonTargeting_Human_0206	1	0.011603	0.011509	0.394421	92	1	-6.0302	0.9884	0.9886	0.999997	1717	0	-6.0302
MARS2	15	0.01168	0.059477	0.931425	93	8	-0.63335	0.078711	0.25333	0.987471	245	3	-0.63335
INTS6	15	0.011887	0.06029	0.931425	94	4	0.13931	0.0089428	0.046891	0.875876	72	5	0.13931
NSUN3	15	0.012065	0.061115	0.931425	95	9	-0.5525	0.10005	0.30238	0.987471	297	3	-0.5525
RUVBL1	13	0.012089	0.057922	0.931425	96	4	0.34211	0.022544	0.094712	0.902105	123	5	0.34211
PHF3	15	0.013125	0.065823	0.969091	97	9	-0.60977	0.58243	0.8152	0.999997	1173	3	-0.60977
DARS	12	0.013241	0.060217	0.931425	98	6	-0.73772	0.62666	0.81438	0.999997	1239	1	-0.73772
MED27	15	0.013408	0.06688	0.976444	99	7	-0.186	0.12793	0.35394	0.999997	349	2	-0.186
MRPL42	15	0.01424	0.070135	0.990294	100	6	-0.15909	0.99851	0.99854	0.999997	1741	0	-0.15909
CENPA	15	0.014475	0.070977	0.990294	101	8	-0.49764	0.60959	0.83254	0.999997	1217	3	-0.49764
IPO9	15	0.014551	0.071259	0.990294	102	8	-0.68268	0.88935	0.95514	0.999997	1612	2	-0.68268
AGPAT6	15	0.014679	0.071785	0.990294	103	8	-0.44487	0.94949	0.9774	0.999997	1687	1	-0.44487
HIST2H3A	15	0.015238	0.073921	0.999822	104	8	-0.61265	0.95601	0.98038	0.999997	1693	1	-0.61265
NonTargeting_Human_0939	1	0.016475	0.016595	0.528623	105	1	-5.6802	0.98352	0.98369	0.999997	1714	0	-5.6802
TBPL2	15	0.016593	0.078663	0.999822	106	3	0.032195	0.65847	0.86254	0.999997	1298	4	0.032195
KTI12	15	0.017239	0.081042	0.999997	107	8	-0.44994	0.64798	0.85599	0.999997	1274	4	-0.44994
ZBTB17	15	0.017958	0.083675	0.999997	108	7	-0.26502	0.93416	0.97068	0.999997	1667	2	-0.26502
SNRPD1	13	0.018116	0.081398	0.999997	109	4	0.2966	0.14586	0.37351	0.999997	385	5	0.2966
ST6GAL1	15	0.018983	0.087219	0.999997	110	8	-0.60215	0.4236	0.71146	0.999997	888	2	-0.60215
MOCS3	15	0.01903	0.087399	0.999997	111	4	-0.25229	0.99224	0.99247	0.999997	1724	1	-0.25229
C2orf49	15	0.019062	0.087479	0.999997	112	6	-0.37498	0.020246	0.090095	0.881824	116	4	-0.37498
METTL17	15	0.019468	0.088903	0.999997	113	5	-0.19545	0.28744	0.5771	0.999997	658	3	-0.19545
SYS1	15	0.020027	0.0907	0.999997	114	8	-0.4844	0.93376	0.97055	0.999997	1666	1	-0.4844
RALGAPB	15	0.020295	0.09161	0.999997	115	8	-0.56243	0.9153	0.96362	0.999997	1637	2	-0.56243
ATP11A	15	0.020475	0.092214	0.999997	116	8	-0.48086	0.27431	0.56356	0.999997	629	4	-0.48086
GART	15	0.020729	0.093085	0.999997	117	8	-0.54927	0.14788	0.3875	0.999997	393	2	-0.54927
JAK1	15	0.020779	0.093299	0.999997	118	8	-0.52519	0.57473	0.81037	0.999997	1163	2	-0.52519
NonTargeting_Human_0921	1	0.020852	0.02102	0.575418	119	1	-5.4157	0.97915	0.97898	0.999997	1710	0	-5.4157
RALGAPA2	15	0.021656	0.096458	0.999997	120	8	-0.56499	0.76641	0.90637	0.999997	1444	3	-0.56499
ZBTB37	15	0.022106	0.097984	0.999997	121	7	0.014385	0.050772	0.18474	0.97864	178	7	0.014385
NUDT17	15	0.023094	0.10169	0.999997	122	8	-0.64066	0.16241	0.41033	0.999997	431	3	-0.64066
SETDB1	15	0.024014	0.1049	0.999997	123	8	-0.64327	0.99179	0.9921	0.999997	1721	1	-0.64327
GET4	15	0.024412	0.1063	0.999997	124	7	-0.39762	0.87011	0.94992	0.999997	1586	1	-0.39762
NonTargeting_Human_0262	1	0.024651	0.024744	0.648663	125	1	-1.6671	0.97535	0.97506	0.999997	1706	0	-1.6671
CCT6B	15	0.0247	0.10733	0.999997	126	5	0.16854	0.27947	0.56894	0.999997	640	5	0.16854
PAM16	15	0.025096	0.10872	0.999997	127	6	-0.45144	0.77753	0.91119	0.999997	1457	1	-0.45144
MTA2	15	0.027111	0.11562	0.999997	128	7	-0.3739	0.48532	0.75425	0.999997	993	2	-0.3739
ARFRP1	15	0.027908	0.11829	0.999997	129	6	-0.44963	0.4608	0.73882	0.999997	953	2	-0.44963
PACRGL	15	0.028509	0.12027	0.999997	130	7	-0.28897	0.37451	0.664	0.999997	800	3	-0.28897
NHLRC2	13	0.028731	0.11659	0.999997	131	5	-0.37363	0.66947	0.84641	0.999997	1312	2	-0.37363
CCT8	15	0.028884	0.12157	0.999997	132	3	-0.0086404	0.3748	0.66424	0.999997	801	5	-0.0086404
DPY30	15	0.029431	0.12347	0.999997	133	5	-0.098625	0.16886	0.42046	0.999997	447	3	-0.098625
NonTargeting_Human_0109	1	0.029441	0.029587	0.687548	134	1	-1.1864	0.97056	0.97045	0.999997	1703	0	-1.1864
CCDC43	15	0.02961	0.12405	0.999997	135	8	-0.50361	0.29787	0.58787	0.999997	679	5	-0.50361
PRDM8	15	0.029923	0.12512	0.999997	136	4	0.17367	0.25705	0.54479	0.999997	597	5	0.17367
NonTargeting_Human_0301	1	0.030349	0.03061	0.687548	137	1	-3.875	0.96965	0.96953	0.999997	1702	0	-3.875
FURIN	15	0.030431	0.12686	0.999997	138	8	-0.45866	0.58761	0.81828	0.999997	1179	3	-0.45866
KAT8	14	0.030519	0.12549	0.999997	139	6	-0.31946	0.99763	0.99758	0.999997	1738	0	-0.31946
RALGAPA1	15	0.03134	0.12999	0.999997	140	8	-0.50378	0.65625	0.86103	0.999997	1291	3	-0.50378
ATP6V0D1	14	0.031344	0.12794	0.999997	141	2	-0.018526	0.24641	0.51825	0.999997	583	4	-0.018526
GTF2H3	15	0.032136	0.13252	0.999997	142	8	-0.67804	0.80742	0.92494	0.999997	1503	3	-0.67804
TADA2A	15	0.032302	0.13301	0.999997	143	8	-0.5556	0.99667	0.99674	0.999997	1732	0	-0.5556
INTS2	14	0.033505	0.13401	0.999997	144	5	0.013612	0.046465	0.16869	0.962702	168	5	0.013612
GOLGA6A	15	0.034626	0.14027	0.999997	145	5	-0.23976	0.31839	0.60893	0.999997	713	4	-0.23976
CAPZA1	15	0.035753	0.14405	0.999997	146	6	-0.078934	0.41658	0.70462	0.999997	872	5	-0.078934
ZBTB8OS	15	0.035959	0.14482	0.999997	147	7	-0.48783	0.37704	0.66638	0.999997	804	3	-0.48783
NonTargeting_Human_0281	1	0.037121	0.037397	0.7919	148	1	-1.1647	0.96288	0.96283	0.999997	1699	0	-1.1647
ALG13	15	0.03729	0.14869	0.999997	149	8	-0.57882	0.54102	0.78862	0.999997	1099	3	-0.57882
SNF8	15	0.037312	0.14873	0.999997	150	5	-0.12696	0.26144	0.5496	0.999997	605	5	-0.12696
NXPH2	15	0.037799	0.15024	0.999997	151	7	-0.42707	0.46393	0.74075	0.999997	956	4	-0.42707
RPL13A	13	0.038617	0.146	0.999997	152	4	0.17512	0.023603	0.098346	0.902105	124	5	0.17512
ZBTB10	15	0.038636	0.15316	0.999997	153	7	-0.37777	0.99216	0.99238	0.999997	1723	1	-0.37777
KMT2D	15	0.039658	0.1565	0.999997	154	7	-0.53774	0.37257	0.66199	0.999997	797	3	-0.53774
GFER	15	0.039809	0.15699	0.999997	155	5	-0.25841	0.62115	0.83977	0.999997	1229	3	-0.25841
DET1	15	0.040123	0.15793	0.999997	156	4	-0.099814	0.054077	0.19331	0.97951	189	4	-0.099814
KDM8	15	0.040137	0.15798	0.999997	157	6	-0.12442	0.51891	0.77518	0.999997	1062	3	-0.12442
GATS	15	0.040324	0.15858	0.999997	158	8	-0.48599	0.9392	0.97284	0.999997	1673	2	-0.48599
CARS	15	0.041097	0.16113	0.999997	159	6	-0.45084	0.97999	0.98608	0.999997	1712	1	-0.45084
LAMTOR4	15	0.041778	0.16317	0.999997	160	7	-0.27706	0.9615	0.98131	0.999997	1697	1	-0.27706
MED9	15	0.042415	0.16524	0.999997	161	8	-0.42618	0.36385	0.6539	0.999997	786	4	-0.42618
DNAJC13	15	0.042893	0.16667	0.999997	162	8	-0.50688	0.10395	0.31112	0.987471	309	3	-0.50688
NonTargeting_Human_0829	1	0.042985	0.043461	0.855546	163	1	-2.1507	0.95702	0.9568	0.999997	1695	0	-2.1507
SEC13	15	0.044409	0.1714	0.999997	164	7	-0.31354	0.73088	0.89153	0.999997	1401	2	-0.31354
ZNRF3	15	0.044913	0.17298	0.999997	165	8	-0.42599	0.96788	0.98272	0.999997	1701	1	-0.42599
GAGE12B	15	0.045249	0.17398	0.999997	166	5	-0.30943	0.051373	0.1864	0.97864	180	5	-0.30943
MED20	15	0.045415	0.17445	0.999997	167	7	-0.37165	0.30792	0.59818	0.999997	697	4	-0.37165
hsa-mir-3670-1	5	0.046393	0.1192	0.999997	168	1	0.1092	0.90802	0.90844	0.999997	1630	0	0.1092
TMEM199	15	0.046431	0.17755	0.999997	169	3	0.49481	0.017812	0.081703	0.875876	108	5	0.49481
COX5B	15	0.046438	0.17756	0.999997	170	7	-0.23079	0.60245	0.82789	0.999997	1201	4	-0.23079
HSD17B10	14	0.046551	0.17061	0.999997	171	7	-0.60493	0.97517	0.98147	0.999997	1705	1	-0.60493
COPS3	14	0.046926	0.17161	0.999997	172	3	0.20857	0.28877	0.56731	0.999997	660	4	0.20857
POLR3C	14	0.047298	0.17258	0.999997	173	7	-0.59997	0.25196	0.52502	0.999997	589	3	-0.59997
RBM14	15	0.047905	0.1813	0.999997	174	6	-0.19585	0.037748	0.14986	0.955463	154	4	-0.19585
POLR1B	15	0.048042	0.18165	0.999997	175	7	-0.037618	0.075838	0.24673	0.987471	238	4	-0.037618
COPS8	15	0.048666	0.18311	0.999997	176	6	-0.10031	0.55152	0.79544	0.999997	1121	4	-0.10031
ACTR6	15	0.049012	0.18393	0.999997	177	4	0.59076	0.036686	0.14661	0.955463	151	7	0.59076
EIF2B4	14	0.049263	0.17786	0.999997	178	3	-0.21757	0.80815	0.92324	0.999997	1504	2	-0.21757
NonTargeting_Human_0105	1	0.050004	0.050768	0.918564	179	1	-1.7348	0.95	0.94975	0.999997	1690	0	-1.7348
NonTargeting_Human_0924	1	0.0505	0.051147	0.918564	180	1	-2.5964	0.9495	0.9492	0.999997	1688	0	-2.5964
COPS2	14	0.050572	0.18157	0.999997	181	7	-0.49053	0.79328	0.91533	0.999997	1481	1	-0.49053
NonTargeting_Human_0128	1	0.050665	0.051299	0.918564	182	1	-1.4776	0.94934	0.94902	0.999997	1686	0	-1.4776
CDK12	15	0.050677	0.18798	0.999997	183	5	-0.010238	0.46011	0.73836	0.999997	950	2	-0.010238
NonTargeting_Human_0857	1	0.051491	0.052147	0.918564	184	1	-2.0661	0.94851	0.9482	0.999997	1684	0	-2.0661
ATP5F1	15	0.052306	0.19203	0.999997	185	7	-0.29533	0.77766	0.91126	0.999997	1459	2	-0.29533
TPI1	15	0.052668	0.19295	0.999997	186	4	-0.1626	0.52265	0.77743	0.999997	1069	3	-0.1626
PTAR1	15	0.053125	0.19407	0.999997	187	4	0.05801	0.30861	0.5989	0.999997	700	4	0.05801
NonTargeting_Human_0546	1	0.053968	0.054458	0.928837	188	1	-1.3539	0.94603	0.94567	0.999997	1681	0	-1.3539
GPN2	14	0.054392	0.19182	0.999997	189	4	0.07117	0.49792	0.75153	0.999997	1015	2	0.07117
DNLZ	15	0.055024	0.19881	0.999997	190	6	-0.34412	0.61294	0.8347	0.999997	1221	3	-0.34412
GINS2	13	0.056438	0.19667	0.999997	191	5	0.10544	0.006151	0.032017	0.824913	61	5	0.10544
NonTargeting_Human_0421	1	0.056941	0.057476	0.931425	192	1	-1.2708	0.94306	0.94276	0.999997	1679	0	-1.2708
STXBP5L	15	0.057099	0.20395	0.999997	193	7	-0.27106	0.10869	0.321	0.998393	317	3	-0.27106
PSMD5	15	0.057136	0.20403	0.999997	194	5	-0.32262	0.49457	0.76016	0.999997	1007	2	-0.32262
ZNHIT1	15	0.057282	0.20432	0.999997	195	7	-0.28316	0.15889	0.40476	0.999997	423	5	-0.28316
TMEM87B	15	0.057417	0.20472	0.999997	196	5	0.19596	0.028273	0.11861	0.944532	134	5	0.19596
NonTargeting_Human_0181	1	0.057932	0.058488	0.931425	197	1	-1.4851	0.94207	0.94192	0.999997	1678	0	-1.4851
HIST2H2BF	15	0.058111	0.20636	0.999997	198	7	-0.31527	0.53256	0.78333	0.999997	1083	4	-0.31527
NonTargeting_Human_0501	1	0.058345	0.058895	0.931425	199	1	-1.7947	0.94165	0.94143	0.999997	1677	0	-1.7947
NonTargeting_Human_0685	1	0.058758	0.059335	0.931425	200	1	-2.8908	0.94124	0.94101	0.999997	1676	0	-2.8908
NonTargeting_Human_0665	1	0.059914	0.060528	0.931425	201	1	-1.0307	0.94009	0.93974	0.999997	1675	0	-1.0307
NonTargeting_Human_0809	1	0.060492	0.061138	0.931425	202	1	-2.0371	0.93951	0.9392	0.999997	1674	0	-2.0371
PFDN2	14	0.0612	0.20936	0.999997	203	6	-0.037485	0.31553	0.59758	0.999997	707	3	-0.037485
NonTargeting_Human_0036	1	0.061401	0.061969	0.935942	204	1	-1.7012	0.9386	0.93836	0.999997	1672	0	-1.7012
CAPZB	15	0.061931	0.21598	0.999997	205	4	0.2432	0.008834	0.046275	0.875876	70	7	0.2432
COPS6	13	0.062008	0.20969	0.999997	206	6	-0.34199	0.67505	0.84931	0.999997	1319	3	-0.34199
NCBP2	13	0.062642	0.21097	0.999997	207	6	-0.38724	0.41929	0.68197	0.999997	880	4	-0.38724
KIAA1432	15	0.062829	0.21803	0.999997	208	5	-0.069588	0.055401	0.19655	0.97951	191	5	-0.069588
SUMO2	15	0.063093	0.21866	0.999997	209	6	0.077414	0.24038	0.5269	0.999997	566	5	0.077414
NonTargeting_Human_0836	1	0.063465	0.063998	0.958323	210	1	-1.6396	0.93653	0.93626	0.999997	1669	0	-1.6396
SPNS1	15	0.063946	0.22064	0.999997	211	7	-0.42883	0.95674	0.98052	0.999997	1694	1	-0.42883
RANBP1	15	0.06513	0.22342	0.999997	212	7	-0.45434	0.91702	0.96424	0.999997	1641	2	-0.45434
NonTargeting_Human_0120	1	0.065199	0.065772	0.969091	213	1	-1.2989	0.9348	0.93454	0.999997	1668	0	-1.2989
NonTargeting_Human_0590	1	0.066769	0.067507	0.977457	214	1	-2.3054	0.93323	0.93313	0.999997	1665	0	-2.3054
INPP5J	15	0.067262	0.22844	0.999997	215	7	-0.44219	0.63592	0.84894	0.999997	1255	2	-0.44219
NonTargeting_Human_0527	1	0.067594	0.068123	0.978291	216	1	-0.90243	0.93241	0.93235	0.999997	1664	0	-0.90243
NonTargeting_Human_0107	1	0.068255	0.068739	0.979111	217	1	-0.98233	0.93174	0.93171	0.999997	1663	0	-0.98233
UXT	15	0.06915	0.23296	0.999997	218	6	-0.31417	0.1016	0.30603	0.987471	302	3	-0.31417
KLHDC7B	15	0.070067	0.23494	0.999997	219	5	-0.22602	0.091045	0.28209	0.987471	282	5	-0.22602
TMEM253	15	0.070394	0.23578	0.999997	220	6	-0.21034	0.1575	0.40273	0.999997	418	4	-0.21034
SNAPC3	14	0.070887	0.23381	0.999997	221	5	-0.30751	0.22137	0.48842	0.999997	535	5	-0.30751
PFN1	15	0.071224	0.23769	0.999997	222	5	-0.31038	0.35642	0.64667	0.999997	772	3	-0.31038
WDR33	15	0.072179	0.24007	0.999997	223	2	0.43373	0.13202	0.36056	0.999997	358	6	0.43373
NonTargeting_Human_0808	1	0.07288	0.073605	0.999822	224	1	-1.3069	0.92712	0.92723	0.999997	1659	0	-1.3069
EIF3F	14	0.072892	0.23864	0.999997	225	5	-0.057935	0.17307	0.42346	0.999997	457	5	-0.057935
NonTargeting_Human_0683	1	0.073623	0.074339	0.999822	226	1	-1.3352	0.92638	0.92658	0.999997	1657	0	-1.3352
SRCAP	15	0.074106	0.24464	0.999997	227	5	-0.32259	0.9306	0.96932	0.999997	1660	2	-0.32259
hsa-mir-6817	12	0.074526	0.23017	0.999997	228	5	-0.2406	0.24362	0.5065	0.999997	578	1	-0.2406
NonTargeting_Human_0881	1	0.074779	0.07556	0.999822	229	1	-1.5877	0.92522	0.92556	0.999997	1656	0	-1.5877
NonTargeting_Human_0388	1	0.074944	0.075673	0.999822	230	1	-1.003	0.92506	0.9254	0.999997	1655	0	-1.003
CCDC169-SOHLH2	15	0.07583	0.24875	0.999997	231	7	0.39081	0.06454	0.21931	0.987471	215	7	0.39081
NonTargeting_Human_0591	1	0.075853	0.076673	0.999822	232	1	-1.3076	0.92415	0.92447	0.999997	1653	0	-1.3076
NonTargeting_Human_0814	1	0.076761	0.077617	0.999822	233	1	-1.3653	0.92324	0.92351	0.999997	1651	0	-1.3653
NonTargeting_Human_0439	1	0.076844	0.077668	0.999822	234	1	-0.52414	0.92316	0.92341	0.999997	1650	0	-0.52414
MRPL9	15	0.077003	0.25135	0.999997	235	6	-0.14688	0.72165	0.88775	0.999997	1389	3	-0.14688
NonTargeting_Human_0980	1	0.077009	0.077866	0.999822	236	1	-1.8567	0.92299	0.92321	0.999997	1649	0	-1.8567
NonTargeting_Human_0286	1	0.07833	0.079228	0.999822	237	1	-1.1327	0.92167	0.92191	0.999997	1647	0	-1.1327
NonTargeting_Human_0170	1	0.078413	0.079324	0.999822	238	1	-1.9169	0.92159	0.92182	0.999997	1646	0	-1.9169
SORT1	15	0.079085	0.25594	0.999997	239	6	-0.29602	0.63001	0.8453	0.999997	1245	2	-0.29602
MRPS31	15	0.079142	0.25608	0.999997	240	7	-0.55595	0.99288	0.99299	0.999997	1726	1	-0.55595
USP50	15	0.079284	0.25638	0.999997	241	4	-0.24617	0.7779	0.91137	0.999997	1460	3	-0.24617
RCC1	15	0.079373	0.25661	0.999997	242	6	-0.14169	0.60172	0.82735	0.999997	1199	2	-0.14169
BAGE2	15	0.082353	0.2637	0.999997	243	7	-0.34472	0.43436	0.72138	0.999997	903	4	-0.34472
NonTargeting_Human_0273	1	0.082872	0.083862	0.999997	244	1	-1.0498	0.91713	0.91752	0.999997	1642	0	-1.0498
GTPBP5	15	0.082958	0.26515	0.999997	245	7	-0.39909	0.28381	0.57341	0.999997	646	3	-0.39909
NonTargeting_Human_0502	1	0.083037	0.084037	0.999997	246	1	-0.80127	0.91696	0.91728	0.999997	1640	0	-0.80127
NonTargeting_Human_0545	1	0.08345	0.084449	0.999997	247	1	-1.4723	0.91655	0.91681	0.999997	1639	0	-1.4723
NonTargeting_Human_0509	1	0.084772	0.085693	0.999997	248	1	-1.263	0.91523	0.9155	0.999997	1636	0	-1.263
GMPPB	14	0.08485	0.26776	0.999997	249	6	-0.27954	0.72461	0.88161	0.999997	1390	3	-0.27954
SLC12A9	15	0.085564	0.27118	0.999997	250	6	-0.29213	0.42941	0.71688	0.999997	894	4	-0.29213
DDX52	15	0.085861	0.27182	0.999997	251	5	-0.21829	0.090119	0.27995	0.987471	278	2	-0.21829
NonTargeting_Human_0742	1	0.087001	0.087665	0.999997	252	1	-1.1141	0.913	0.91334	0.999997	1634	0	-1.1141
SNX1	15	0.087279	0.27498	0.999997	253	5	-0.25649	0.31746	0.6081	0.999997	710	4	-0.25649
KLHL20	15	0.087291	0.27499	0.999997	254	6	-0.34087	0.49529	0.76059	0.999997	1008	2	-0.34087
GPBP1L1	15	0.087731	0.27602	0.999997	255	4	-0.24833	0.79639	0.91969	0.999997	1487	3	-0.24833
NonTargeting_Human_0763	1	0.087745	0.088496	0.999997	256	1	-1.3491	0.91226	0.91254	0.999997	1633	0	-1.3491
STAG2	15	0.088279	0.27715	0.999997	257	6	-0.25675	0.83998	0.9404	0.999997	1547	1	-0.25675
NonTargeting_Human_0524	1	0.089314	0.089937	0.999997	258	1	-0.89285	0.91069	0.91091	0.999997	1631	0	-0.89285
NELFB	15	0.090199	0.28136	0.999997	259	7	-0.31081	0.73122	0.89167	0.999997	1403	2	-0.31081
PPP1R8	15	0.090686	0.28249	0.999997	260	2	0.52891	0.023885	0.10329	0.915941	125	7	0.52891
UPP2	15	0.091215	0.28369	0.999997	261	5	0.017472	0.44326	0.72766	0.999997	921	3	0.017472
NonTargeting_Human_0688	1	0.092287	0.093051	0.999997	262	1	-1.3124	0.90771	0.9081	0.999997	1629	0	-1.3124
WDR55	15	0.093888	0.28957	0.999997	263	5	-0.099995	0.011565	0.058476	0.875876	83	4	-0.099995
STAM2	15	0.094095	0.29003	0.999997	264	7	-0.01939	0.30678	0.59702	0.999997	695	5	-0.01939
SDHAF1	15	0.094284	0.29042	0.999997	265	5	0.05615	0.26845	0.55684	0.999997	619	5	0.05615
C16orf62	15	0.095117	0.29231	0.999997	266	7	-0.022288	0.50705	0.76804	0.999997	1036	3	-0.022288
PPP1CB	15	0.095481	0.29302	0.999997	267	6	0.28545	0.15785	0.40329	0.999997	419	6	0.28545
MESDC2	15	0.095564	0.29313	0.999997	268	5	-0.066783	0.23516	0.5194	0.999997	557	3	-0.066783
B4GALT2	15	0.096136	0.2945	0.999997	269	5	-0.27737	0.75655	0.90206	0.999997	1436	2	-0.27737
NonTargeting_Human_0151	1	0.097737	0.098546	0.999997	270	1	-0.89876	0.90226	0.90274	0.999997	1627	0	-0.89876
TBX1	15	0.097835	0.29825	0.999997	271	7	-0.37584	0.65782	0.86204	0.999997	1295	3	-0.37584
CLEC12B	15	0.097923	0.29848	0.999997	272	4	0.012569	0.11309	0.32901	0.999997	328	3	0.012569
EPAS1	15	0.098385	0.29946	0.999997	273	6	-0.27903	0.29728	0.58722	0.999997	675	4	-0.27903
UPF1	15	0.098502	0.29972	0.999997	274	5	0.38375	0.080094	0.25653	0.987471	249	6	0.38375
CERS6	15	0.099805	0.30267	0.999997	275	4	-0.16762	0.77258	0.90892	0.999997	1451	3	-0.16762
HIST2H2AA3	15	0.099938	0.30294	0.999997	276	7	-0.30653	0.29238	0.58232	0.999997	668	4	-0.30653
NonTargeting_Human_0163	1	0.10005	0.10111	0.999997	277	1	-0.77293	0.89995	0.90037	0.999997	1624	0	-0.77293
NonTargeting_Human_0842	1	0.10046	0.10161	0.999997	278	1	-0.99013	0.89954	0.89985	0.999997	1622	0	-0.99013
PRMT1	15	0.10083	0.30488	0.999997	279	5	0.074333	0.011428	0.057928	0.875876	82	5	0.074333
RPUSD4	15	0.10085	0.3049	0.999997	280	6	-0.34922	0.66503	0.86601	0.999997	1306	2	-0.34922
RPL41	7	0.10091	0.24623	0.999997	281	3	-0.24559	0.316	0.52015	0.999997	709	2	-0.24559
NonTargeting_Human_0398	1	0.10203	0.10319	0.999997	282	1	-1.0196	0.89797	0.89827	0.999997	1621	0	-1.0196
NonTargeting_Human_0080	1	0.10228	0.10343	0.999997	283	1	-1.3024	0.89772	0.89801	0.999997	1620	0	-1.3024
MLLT11	15	0.10234	0.30833	0.999997	284	7	-0.271	0.95381	0.97941	0.999997	1692	1	-0.271
SBK1	15	0.10247	0.30865	0.999997	285	7	-0.43594	0.74016	0.89541	0.999997	1416	2	-0.43594
UBE2Q1	15	0.10356	0.31092	0.999997	286	5	0.1063	0.056615	0.19963	0.97951	198	4	0.1063
METAP1D	15	0.10374	0.31122	0.999997	287	4	0.14125	0.24106	0.52769	0.999997	571	5	0.14125
NonTargeting_Human_0703	1	0.10385	0.105	0.999997	288	1	-1.1848	0.89615	0.89643	0.999997	1619	0	-1.1848
NonTargeting_Human_0138	1	0.10616	0.10731	0.999997	289	1	-0.98319	0.89384	0.89414	0.999997	1617	0	-0.98319
FUNDC2	15	0.10643	0.31731	0.999997	290	3	0.01184	0.95237	0.9788	0.999997	1691	2	0.01184
TAF10	15	0.10754	0.31958	0.999997	291	5	-0.12951	0.52653	0.77966	0.999997	1076	4	-0.12951
USP39	15	0.1079	0.32028	0.999997	292	4	0.16721	0.38348	0.67261	0.999997	813	4	0.16721
NonTargeting_Human_0988	1	0.10798	0.10921	0.999997	293	1	-1.3007	0.89202	0.89232	0.999997	1616	0	-1.3007
PON1	15	0.10822	0.32096	0.999997	294	7	-0.34706	0.60467	0.82931	0.999997	1206	3	-0.34706
TFAM	15	0.10826	0.32107	0.999997	295	6	0.023064	0.11652	0.3346	0.999997	334	4	0.023064
ARGLU1	15	0.10857	0.32182	0.999997	296	5	0.129	0.53342	0.78389	0.999997	1084	4	0.129
ARPC3	15	0.10866	0.32202	0.999997	297	6	0.15765	0.096337	0.29413	0.987471	289	6	0.15765
AHSP	15	0.10977	0.3244	0.999997	298	2	-0.018612	0.071224	0.2354	0.987471	224	3	-0.018612
NonTargeting_Human_0099	1	0.11012	0.1115	0.999997	299	1	-1.582	0.88988	0.89007	0.999997	1614	0	-1.582
NonTargeting_Human_0899	1	0.11054	0.11185	0.999997	300	1	-1.6008	0.88946	0.88972	0.999997	1613	0	-1.6008
NonTargeting_Human_0185	1	0.1112	0.11247	0.999997	301	1	-0.78265	0.8888	0.88901	0.999997	1611	0	-0.78265
hsa-mir-3680-1	10	0.11311	0.29511	0.999997	302	4	0.031501	0.4819	0.69572	0.999997	985	3	0.031501
NonTargeting_Human_0736	1	0.11318	0.1144	0.999997	303	1	-0.87248	0.88682	0.88701	0.999997	1610	0	-0.87248
NonTargeting_Human_0520	1	0.1145	0.11567	0.999997	304	1	-1.1439	0.8855	0.8856	0.999997	1609	0	-1.1439
NonTargeting_Human_0772	1	0.11516	0.11637	0.999997	305	1	-1.4557	0.88484	0.88482	0.999997	1608	0	-1.4557
NonTargeting_Human_0802	1	0.11533	0.11653	0.999997	306	1	-1.4408	0.88467	0.88458	0.999997	1607	0	-1.4408
NonTargeting_Human_0866	1	0.11541	0.1166	0.999997	307	1	-1.6493	0.88459	0.88451	0.999997	1606	0	-1.6493
CNOT2	14	0.11627	0.3267	0.999997	308	6	-0.25654	0.04582	0.16686	0.962702	165	3	-0.25654
DNAJC4	15	0.11703	0.3399	0.999997	309	5	-0.17192	0.72756	0.89024	0.999997	1397	2	-0.17192
PPAT	15	0.11766	0.34131	0.999997	310	6	-0.21826	0.46978	0.74427	0.999997	969	3	-0.21826
hsa-mir-6859-1	11	0.11891	0.31128	0.999997	311	3	0.066492	0.062352	0.20061	0.97951	210	2	0.066492
CCZ1	15	0.11974	0.34572	0.999997	312	6	0.22862	0.008465	0.044552	0.875876	69	6	0.22862
NonTargeting_Human_0430	1	0.11979	0.1211	0.999997	313	1	-1.7183	0.88021	0.88002	0.999997	1604	0	-1.7183
GZF1	15	0.11992	0.34599	0.999997	314	6	-0.13891	0.38842	0.67724	0.999997	821	3	-0.13891
NonTargeting_Human_0478	1	0.12103	0.12223	0.999997	315	1	-0.70113	0.87897	0.87875	0.999997	1602	0	-0.70113
NonTargeting_Human_0927	1	0.12127	0.12241	0.999997	316	1	-0.89207	0.87873	0.87848	0.999997	1601	0	-0.89207
HMOX2	15	0.12136	0.34885	0.999997	317	6	-0.31641	0.90403	0.95978	0.999997	1628	2	-0.31641
POLR2C	15	0.12223	0.35079	0.999997	318	7	-0.14916	0.10356	0.31031	0.987471	307	4	-0.14916
NonTargeting_Human_0885	1	0.12251	0.12374	0.999997	319	1	-1.4081	0.87749	0.87728	0.999997	1598	0	-1.4081
NonTargeting_Human_0329	1	0.12276	0.12403	0.999997	320	1	-0.871	0.87724	0.87701	0.999997	1597	0	-0.871
NonTargeting_Human_0675	1	0.12301	0.12428	0.999997	321	1	-0.84638	0.87699	0.87671	0.999997	1596	0	-0.84638
TRIM4	15	0.12349	0.35323	0.999997	322	6	-0.11462	0.5164	0.77364	0.999997	1054	2	-0.11462
NonTargeting_Human_0059	1	0.12416	0.12543	0.999997	323	1	-0.90091	0.87584	0.87561	0.999997	1594	0	-0.90091
NonTargeting_Human_0641	1	0.12482	0.12603	0.999997	324	1	-1.1437	0.87518	0.87502	0.999997	1593	0	-1.1437
MRP63	15	0.12492	0.3556	0.999997	325	5	0.15829	0.78522	0.91474	0.999997	1471	3	0.15829
RNF151	15	0.12501	0.35576	0.999997	326	5	0.23265	0.090572	0.28097	0.987471	281	7	0.23265
PIAS1	15	0.12543	0.35637	0.999997	327	5	0.10603	0.23857	0.52463	0.999997	562	4	0.10603
GLOD5	15	0.12565	0.35673	0.999997	328	5	-0.05902	0.56819	0.8061	0.999997	1154	3	-0.05902
PQBP1	15	0.12663	0.35822	0.999997	329	6	-0.073015	0.65824	0.86241	0.999997	1297	2	-0.073015
SP140	15	0.12676	0.35839	0.999997	330	5	0.046941	0.28213	0.5717	0.999997	644	3	0.046941
NonTargeting_Human_0018	1	0.12697	0.12806	0.999997	331	1	-0.70311	0.87303	0.87282	0.999997	1592	0	-0.70311
NonTargeting_Human_0871	1	0.12722	0.12825	0.999997	332	1	-0.57193	0.87278	0.87257	0.999997	1591	0	-0.57193
NonTargeting_Human_0538	1	0.12747	0.12842	0.999997	333	1	-1.6103	0.87253	0.87231	0.999997	1590	0	-1.6103
NonTargeting_Human_0543	1	0.12821	0.1292	0.999997	334	1	-0.80734	0.87179	0.8716	0.999997	1589	0	-0.80734
NonTargeting_Human_0353	1	0.12838	0.12943	0.999997	335	1	-1.4486	0.87162	0.87145	0.999997	1588	0	-1.4486
NonTargeting_Human_0216	1	0.13003	0.13098	0.999997	336	1	-1.4295	0.86997	0.86979	0.999997	1584	0	-1.4295
NonTargeting_Human_0471	1	0.13127	0.13232	0.999997	337	1	-0.6122	0.86873	0.86863	0.999997	1583	0	-0.6122
NonTargeting_Human_0454	1	0.13143	0.13251	0.999997	338	1	-0.85125	0.86857	0.86849	0.999997	1582	0	-0.85125
NonTargeting_Human_0656	1	0.13193	0.13303	0.999997	339	1	-0.93758	0.86807	0.86807	0.999997	1581	0	-0.93758
USO1	15	0.13202	0.36656	0.999997	340	6	-0.14556	0.4568	0.73622	0.999997	945	4	-0.14556
NonTargeting_Human_0494	1	0.1344	0.13545	0.999997	341	1	-0.91326	0.8656	0.86562	0.999997	1579	0	-0.91326
CTR9	12	0.13443	0.34797	0.999997	342	5	-0.021458	0.8395	0.91851	0.999997	1546	2	-0.021458
KIAA1033	15	0.13445	0.3705	0.999997	343	3	-0.18402	0.22715	0.50782	0.999997	547	4	-0.18402
NonTargeting_Human_0528	1	0.13465	0.13567	0.999997	344	1	-0.74378	0.86535	0.86533	0.999997	1578	0	-0.74378
CCT6A	13	0.13471	0.35676	0.999997	345	4	0.24676	0.53531	0.77608	0.999997	1089	4	0.24676
PLA2G10	15	0.1351	0.37153	0.999997	346	6	-0.058272	0.35118	0.64121	0.999997	763	5	-0.058272
NonTargeting_Human_0252	1	0.13515	0.13616	0.999997	347	1	-0.60809	0.86485	0.86491	0.999997	1577	0	-0.60809
NonTargeting_Human_0200	1	0.13523	0.13623	0.999997	348	1	-0.84006	0.86477	0.86484	0.999997	1576	0	-0.84006
AKAP9	15	0.13529	0.37185	0.999997	349	5	-0.32451	0.48605	0.75476	0.999997	995	3	-0.32451
NonTargeting_Human_0575	1	0.1354	0.13646	0.999997	350	1	-0.7467	0.8646	0.86468	0.999997	1575	0	-0.7467
G6PC	15	0.13546	0.3721	0.999997	351	6	-0.1752	0.14865	0.38868	0.999997	396	6	-0.1752
NonTargeting_Human_0372	1	0.13564	0.13671	0.999997	352	1	-0.87664	0.86436	0.86448	0.999997	1574	0	-0.87664
KBTBD12	15	0.13685	0.37422	0.999997	353	6	-0.46074	0.9368	0.97176	0.999997	1670	2	-0.46074
NonTargeting_Human_0334	1	0.13696	0.13803	0.999997	354	1	-0.79532	0.86304	0.86306	0.999997	1573	0	-0.79532
NonTargeting_Human_0647	1	0.13738	0.13843	0.999997	355	1	-1.3069	0.86262	0.86265	0.999997	1572	0	-1.3069
NonTargeting_Human_0860	1	0.13829	0.13941	0.999997	356	1	-0.8457	0.86171	0.86175	0.999997	1571	0	-0.8457
RALA	15	0.139	0.37765	0.999997	357	5	-0.21868	0.84232	0.94151	0.999997	1550	2	-0.21868
NonTargeting_Human_0563	1	0.13936	0.14051	0.999997	358	1	-1.0979	0.86064	0.86073	0.999997	1570	0	-1.0979
TMEM67	15	0.13947	0.3785	0.999997	359	6	0.20515	0.14474	0.38209	0.999997	381	5	0.20515
NonTargeting_Human_0729	1	0.13985	0.14088	0.999997	360	1	-0.61807	0.86015	0.86021	0.999997	1569	0	-0.61807
AMTN	15	0.1407	0.38052	0.999997	361	6	-0.35434	0.46888	0.74373	0.999997	966	4	-0.35434
EXT1	15	0.14136	0.38162	0.999997	362	5	-0.25989	0.40223	0.69086	0.999997	845	4	-0.25989
MORC3	15	0.14141	0.38171	0.999997	363	6	-0.20277	0.99683	0.99692	0.999997	1734	0	-0.20277
INTS8	15	0.14237	0.38325	0.999997	364	3	0.15622	0.19453	0.46032	0.999997	488	3	0.15622
NonTargeting_Human_0270	1	0.14291	0.14405	0.999997	365	1	-0.68761	0.85709	0.85711	0.999997	1568	0	-0.68761
CREB5	15	0.14303	0.38436	0.999997	366	6	-0.21387	0.78638	0.91525	0.999997	1473	3	-0.21387
NonTargeting_Human_0820	1	0.14332	0.14451	0.999997	367	1	-0.64875	0.85668	0.85669	0.999997	1567	0	-0.64875
SSH3	15	0.1436	0.38546	0.999997	368	3	0.53339	0.17608	0.43202	0.999997	461	6	0.53339
NonTargeting_Human_0565	1	0.1444	0.14552	0.999997	369	1	-0.69399	0.8556	0.8556	0.999997	1565	0	-0.69399
NonTargeting_Human_0075	1	0.14456	0.14566	0.999997	370	1	-0.90921	0.85544	0.85537	0.999997	1564	0	-0.90921
NonTargeting_Human_0792	1	0.14539	0.14635	0.999997	371	1	-0.86434	0.85461	0.85442	0.999997	1563	0	-0.86434
CEP97	15	0.14552	0.38855	0.999997	372	6	-0.31941	0.43737	0.72409	0.999997	907	2	-0.31941
NonTargeting_Human_0807	1	0.14663	0.14753	0.999997	373	1	-0.96495	0.85337	0.85321	0.999997	1562	0	-0.96495
LSM2	15	0.14731	0.39153	0.999997	374	3	0.23478	0.0050358	0.028836	0.789372	56	6	0.23478
CPSF2	15	0.14735	0.39159	0.999997	375	6	0.045901	0.13705	0.36888	0.999997	369	5	0.045901
NonTargeting_Human_0654	1	0.14828	0.14911	0.999997	376	1	-0.69933	0.85172	0.85151	0.999997	1561	0	-0.69933
NonTargeting_Human_0399	1	0.14894	0.14977	0.999997	377	1	-0.63922	0.85106	0.8509	0.999997	1560	0	-0.63922
NonTargeting_Human_0849	1	0.14902	0.14987	0.999997	378	1	-0.64643	0.85098	0.85084	0.999997	1559	0	-0.64643
CCDC115	15	0.14947	0.39495	0.999997	379	6	-0.092716	0.13433	0.36441	0.999997	362	4	-0.092716
GTF2E1	15	0.15001	0.39572	0.999997	380	3	0.2064	0.53223	0.78316	0.999997	1081	4	0.2064
NonTargeting_Human_0100	1	0.15109	0.15197	0.999997	381	1	-0.87213	0.84891	0.84889	0.999997	1558	0	-0.87213
NonTargeting_Human_0335	1	0.15158	0.15235	0.999997	382	1	-0.87481	0.84842	0.84839	0.999997	1557	0	-0.87481
NonTargeting_Human_0007	1	0.15208	0.15283	0.999997	383	1	-0.80717	0.84792	0.84797	0.999997	1556	0	-0.80717
TAF7	15	0.15214	0.399	0.999997	384	4	-0.094163	0.14595	0.3841	0.999997	387	5	-0.094163
NonTargeting_Human_0522	1	0.15299	0.15368	0.999997	385	1	-1.1966	0.84701	0.84711	0.999997	1555	0	-1.1966
RPL23A	15	0.1538	0.40157	0.999997	386	3	0.46573	0.011935	0.059895	0.875876	85	6	0.46573
TBC1D22A	15	0.15454	0.40271	0.999997	387	3	0.040942	0.55916	0.80025	0.999997	1133	4	0.040942
ROR1	15	0.1556	0.40441	0.999997	388	6	-0.49972	0.38133	0.67045	0.999997	808	2	-0.49972
NonTargeting_Human_0516	1	0.15596	0.15645	0.999997	389	1	-1.3818	0.84404	0.84411	0.999997	1552	0	-1.3818
NonTargeting_Human_0605	1	0.15654	0.15706	0.999997	390	1	-0.92229	0.84346	0.84354	0.999997	1551	0	-0.92229
FDX1L	15	0.15849	0.40863	0.999997	391	2	0.94419	0.00019661	0.0014495	0.101584	25	10	0.94419
NonTargeting_Human_0424	1	0.1591	0.1597	0.999997	392	1	-0.9738	0.8409	0.84095	0.999997	1549	0	-0.9738
UBE2L3	15	0.16059	0.41174	0.999997	393	3	0.69035	0.0017518	0.011837	0.493753	40	8	0.69035
NonTargeting_Human_0230	1	0.16108	0.16172	0.999997	394	1	-0.88169	0.83892	0.8388	0.999997	1545	0	-0.88169
IGF1R	15	0.16144	0.41303	0.999997	395	6	-0.054177	0.90037	0.95859	0.999997	1625	2	-0.054177
SCYL1	15	0.16182	0.41353	0.999997	396	6	-0.35109	0.32229	0.61272	0.999997	717	3	-0.35109
NOP16	14	0.16209	0.40611	0.999997	397	1	0.50762	0.013319	0.062573	0.875876	91	6	0.50762
NonTargeting_Human_0137	1	0.1638	0.16429	0.999997	398	1	-0.64008	0.8362	0.83593	0.999997	1541	0	-0.64008
TP53TG3	15	0.16388	0.41675	0.999997	399	5	0.37452	0.030029	0.12474	0.955463	138	8	0.37452
YPEL1	15	0.16565	0.41936	0.999997	400	4	0.18302	0.37763	0.66701	0.999997	805	5	0.18302
NonTargeting_Human_0933	1	0.16603	0.16657	0.999997	401	1	-0.58489	0.83397	0.83362	0.999997	1539	0	-0.58489
NonTargeting_Human_0542	1	0.16636	0.16687	0.999997	402	1	-1.2804	0.83364	0.83329	0.999997	1537	0	-1.2804
POLR2L	15	0.16732	0.42181	0.999997	403	4	0.052213	0.051757	0.18731	0.97864	181	5	0.052213
NonTargeting_Human_0558	1	0.16934	0.16983	0.999997	404	1	-0.59004	0.83066	0.8304	0.999997	1535	0	-0.59004
NonTargeting_Human_0606	1	0.17049	0.17087	0.999997	405	1	-0.92802	0.82951	0.82931	0.999997	1532	0	-0.92802
NonTargeting_Human_0052	1	0.17099	0.17135	0.999997	406	1	-0.81413	0.82901	0.82873	0.999997	1531	0	-0.81413
NonTargeting_Human_0176	1	0.17115	0.17152	0.999997	407	1	-0.66583	0.82885	0.82858	0.999997	1530	0	-0.66583
hsa-mir-1302-6	7	0.17129	0.34633	0.999997	408	3	0.1246	0.45251	0.61823	0.999997	935	2	0.1246
NonTargeting_Human_0773	1	0.17132	0.17169	0.999997	409	1	-0.89904	0.82868	0.82847	0.999997	1529	0	-0.89904
RICTOR	15	0.17261	0.4301	0.999997	410	5	-0.22189	0.19919	0.46747	0.999997	497	2	-0.22189
NonTargeting_Human_0197	1	0.17388	0.17432	0.999997	411	1	-0.84547	0.82612	0.82598	0.999997	1528	0	-0.84547
NonTargeting_Human_0435	1	0.17437	0.17484	0.999997	412	1	-0.87069	0.82563	0.82551	0.999997	1527	0	-0.87069
ARL8A	15	0.17483	0.43332	0.999997	413	6	0.36982	0.087212	0.27345	0.987471	269	6	0.36982
NonTargeting_Human_0582	1	0.17512	0.17555	0.999997	414	1	-0.90871	0.82488	0.82471	0.999997	1525	0	-0.90871
NonTargeting_Human_0306	1	0.1752	0.17564	0.999997	415	1	-0.68027	0.8248	0.82464	0.999997	1524	0	-0.68027
NonTargeting_Human_0989	1	0.17537	0.17576	0.999997	416	1	-1.2112	0.82463	0.8245	0.999997	1523	0	-1.2112
C11orf57	15	0.17727	0.43725	0.999997	417	3	0.082348	0.17227	0.42593	0.999997	453	6	0.082348
KIAA1328	15	0.17823	0.43869	0.999997	418	5	-0.021995	0.33753	0.62818	0.999997	744	4	-0.021995
NonTargeting_Human_0510	1	0.17875	0.17893	0.999997	419	1	-0.59894	0.82125	0.82104	0.999997	1521	0	-0.59894
PDRG1	14	0.17886	0.43402	0.999997	420	5	-0.16152	0.2435	0.51484	0.999997	577	3	-0.16152
NonTargeting_Human_0317	1	0.18205	0.18205	0.999997	421	1	-0.54712	0.81795	0.81781	0.999997	1519	0	-0.54712
NonTargeting_Human_0716	1	0.18239	0.1824	0.999997	422	1	-0.5251	0.81761	0.81748	0.999997	1518	0	-0.5251
PHKG2	15	0.18307	0.44597	0.999997	423	2	0.039697	0.066346	0.22373	0.987471	216	7	0.039697
NonTargeting_Human_0396	1	0.18486	0.18458	0.999997	424	1	-0.52661	0.81514	0.81498	0.999997	1516	0	-0.52661
SYTL3	15	0.18488	0.44866	0.999997	425	4	-0.2764	0.79987	0.92132	0.999997	1490	1	-0.2764
ANKRD36	15	0.18549	0.44957	0.999997	426	6	0.2157	0.62241	0.84062	0.999997	1231	4	0.2157
NonTargeting_Human_0001	1	0.18585	0.18561	0.999997	427	1	-0.75671	0.81415	0.81411	0.999997	1515	0	-0.75671
NonTargeting_Human_0642	1	0.18651	0.18639	0.999997	428	1	-0.5464	0.81349	0.81343	0.999997	1514	0	-0.5464
NonTargeting_Human_0646	1	0.18684	0.18671	0.999997	429	1	-0.60828	0.81316	0.8131	0.999997	1513	0	-0.60828
NonTargeting_Human_0391	1	0.18924	0.18915	0.999997	430	1	-0.63855	0.81076	0.81073	0.999997	1511	0	-0.63855
NonTargeting_Human_0979	1	0.18965	0.18953	0.999997	431	1	-0.83867	0.81035	0.81037	0.999997	1509	0	-0.83867
EIF2S2	15	0.18997	0.45638	0.999997	432	6	-0.12563	0.24141	0.52806	0.999997	573	4	-0.12563
NonTargeting_Human_0581	1	0.1904	0.19018	0.999997	433	1	-0.68163	0.8096	0.80969	0.999997	1507	0	-0.68163
SERPINA1	15	0.19056	0.45722	0.999997	434	6	-0.18845	0.47564	0.74794	0.999997	974	2	-0.18845
SSX2	15	0.1911	0.4579	0.999997	435	3	0.31413	0.064243	0.21868	0.987471	213	7	0.31413
SPINT1	15	0.19146	0.45848	0.999997	436	6	-0.31893	0.32956	0.6204	0.999997	732	4	-0.31893
CHAF1B	14	0.19256	0.45613	0.999997	437	3	0.097701	0.54456	0.785	0.999997	1106	4	0.097701
NonTargeting_Human_0724	1	0.19395	0.19377	0.999997	438	1	-1.1009	0.80605	0.80646	0.999997	1501	0	-1.1009
NonTargeting_Human_0915	1	0.19452	0.19429	0.999997	439	1	-0.74236	0.80548	0.80599	0.999997	1500	0	-0.74236
NonTargeting_Human_0342	1	0.19469	0.19442	0.999997	440	1	-0.64158	0.80531	0.80582	0.999997	1499	0	-0.64158
NonTargeting_Human_0958	1	0.19477	0.1945	0.999997	441	1	-0.43081	0.80523	0.80573	0.999997	1498	0	-0.43081
ZFAND1	15	0.19516	0.46383	0.999997	442	3	0.031223	0.70147	0.87978	0.999997	1358	3	0.031223
ICA1L	15	0.19547	0.46422	0.999997	443	5	-0.10472	0.28018	0.56967	0.999997	643	3	-0.10472
NonTargeting_Human_0580	1	0.19593	0.19563	0.999997	444	1	-0.75553	0.80407	0.80457	0.999997	1496	0	-0.75553
NonTargeting_Human_0082	1	0.19614	0.1959	0.999997	445	1	-0.641	0.80386	0.80435	0.999997	1495	0	-0.641
NonTargeting_Human_0931	1	0.19614	0.1959	0.999997	446	1	-0.641	0.80386	0.80435	0.999997	1494	0	-0.641
NonTargeting_Human_0862	1	0.19758	0.19726	0.999997	447	1	-0.61508	0.80242	0.80298	0.999997	1493	0	-0.61508
ACO2	15	0.19869	0.46902	0.999997	448	3	-0.0080384	0.66234	0.86495	0.999997	1303	3	-0.0080384
hsa-mir-550a-1	9	0.19896	0.41324	0.999997	449	4	-0.36102	0.16392	0.35885	0.999997	434	4	-0.36102
NonTargeting_Human_0655	1	0.19948	0.19915	0.999997	450	1	-0.68935	0.80052	0.80108	0.999997	1491	0	-0.68935
NonTargeting_Human_0552	1	0.2008	0.20052	0.999997	451	1	-0.90339	0.7992	0.79973	0.999997	1489	0	-0.90339
NonTargeting_Human_0369	1	0.20113	0.20092	0.999997	452	1	-0.67902	0.79887	0.79938	0.999997	1488	0	-0.67902
NLRP8	15	0.2012	0.47274	0.999997	453	3	0.10988	0.22448	0.50399	0.999997	542	5	0.10988
TRAPPC1	15	0.2012	0.47274	0.999997	454	2	0.78578	0.0035477	0.021788	0.679781	51	8	0.78578
SSR2	15	0.20315	0.47547	0.999997	455	5	-0.13046	0.82203	0.93193	0.999997	1522	3	-0.13046
NonTargeting_Human_0347	1	0.20377	0.20362	0.999997	456	1	-0.71127	0.79623	0.79681	0.999997	1486	0	-0.71127
NonTargeting_Human_0485	1	0.20468	0.20462	0.999997	457	1	-0.86445	0.79532	0.79595	0.999997	1485	0	-0.86445
NonTargeting_Human_0936	1	0.20485	0.20481	0.999997	458	1	-0.8006	0.79515	0.79574	0.999997	1484	0	-0.8006
NOTCH2NL	15	0.20494	0.47803	0.999997	459	6	-0.19406	0.6515	0.8582	0.999997	1281	3	-0.19406
PDGFA	15	0.20859	0.48314	0.999997	460	6	-0.37931	0.99193	0.9922	0.999997	1722	1	-0.37931
ZNF764	15	0.2087	0.48327	0.999997	461	4	-0.016985	0.8049	0.92378	0.999997	1497	3	-0.016985
SLC4A1AP	15	0.20989	0.48487	0.999997	462	6	-0.01416	0.0069153	0.037448	0.875876	63	7	-0.01416
NonTargeting_Human_0367	1	0.20997	0.20974	0.999997	463	1	-0.69949	0.79003	0.79052	0.999997	1479	0	-0.69949
NonTargeting_Human_0618	1	0.21005	0.20978	0.999997	464	1	-0.84114	0.78995	0.79045	0.999997	1478	0	-0.84114
TAF1	15	0.21032	0.48534	0.999997	465	4	-0.088013	0.42197	0.70996	0.999997	884	3	-0.088013
MED1	15	0.21054	0.48559	0.999997	466	6	0.014867	0.65553	0.86052	0.999997	1290	2	0.014867
NonTargeting_Human_0588	1	0.2122	0.21186	0.999997	467	1	-0.72108	0.7878	0.7885	0.999997	1477	0	-0.72108
hsa-mir-6508	8	0.21256	0.41833	0.999997	468	3	-0.13563	0.85666	0.87904	0.999997	1566	1	-0.13563
NonTargeting_Human_0708	1	0.21269	0.21233	0.999997	469	1	-0.77513	0.78731	0.78799	0.999997	1476	0	-0.77513
NonTargeting_Human_0488	1	0.21327	0.21295	0.999997	470	1	-0.4661	0.78673	0.78736	0.999997	1475	0	-0.4661
NonTargeting_Human_0745	1	0.21352	0.21321	0.999997	471	1	-0.53003	0.78648	0.7871	0.999997	1474	0	-0.53003
NonTargeting_Human_0635	1	0.21368	0.21338	0.999997	472	1	-0.95669	0.78632	0.78701	0.999997	1472	0	-0.95669
NonTargeting_Human_0407	1	0.21484	0.2146	0.999997	473	1	-0.72858	0.78516	0.78581	0.999997	1470	0	-0.72858
CHD7	15	0.21591	0.49326	0.999997	474	3	0.1253	0.84518	0.94287	0.999997	1553	3	0.1253
NonTargeting_Human_0909	1	0.21633	0.21609	0.999997	475	1	-0.74879	0.78367	0.78437	0.999997	1468	0	-0.74879
hsa-mir-6831	12	0.21647	0.47105	0.999997	476	3	0.12192	0.22485	0.48147	0.999997	543	4	0.12192
NonTargeting_Human_0874	1	0.21666	0.21639	0.999997	477	1	-0.54868	0.78334	0.78404	0.999997	1467	0	-0.54868
CTDP1	15	0.21815	0.49639	0.999997	478	5	0.11663	0.40618	0.69472	0.999997	854	1	0.11663
MGEA5	15	0.21863	0.49705	0.999997	479	6	-0.083362	0.55402	0.79694	0.999997	1124	3	-0.083362
NonTargeting_Human_0941	1	0.21913	0.21897	0.999997	480	1	-0.96344	0.78087	0.78156	0.999997	1466	0	-0.96344
NonTargeting_Human_0731	1	0.21922	0.21906	0.999997	481	1	-0.72665	0.78078	0.7815	0.999997	1465	0	-0.72665
NonTargeting_Human_0783	1	0.21938	0.21921	0.999997	482	1	-0.94445	0.78062	0.78128	0.999997	1464	0	-0.94445
NonTargeting_Human_0536	1	0.21971	0.21948	0.999997	483	1	-0.41306	0.78029	0.78095	0.999997	1463	0	-0.41306
MPDU1	15	0.22046	0.49955	0.999997	484	5	-0.00034302	0.40685	0.69539	0.999997	856	3	-0.00034302
CLK2	15	0.22106	0.50025	0.999997	485	6	-0.097326	0.73303	0.89245	0.999997	1406	2	-0.097326
NonTargeting_Human_0766	1	0.22153	0.22125	0.999997	486	1	-0.71483	0.77847	0.77907	0.999997	1461	0	-0.71483
NonTargeting_Human_0375	1	0.22236	0.22205	0.999997	487	1	-0.52327	0.77764	0.77832	0.999997	1458	0	-0.52327
NonTargeting_Human_0668	1	0.22302	0.22265	0.999997	488	1	-0.52886	0.77698	0.77763	0.999997	1456	0	-0.52886
NonTargeting_Human_0547	1	0.22318	0.22285	0.999997	489	1	-0.86588	0.77682	0.77751	0.999997	1455	0	-0.86588
NonTargeting_Human_0784	1	0.22376	0.22336	0.999997	490	1	-0.57076	0.77624	0.77683	0.999997	1454	0	-0.57076
GTF2H2	15	0.22497	0.50596	0.999997	491	6	-0.48968	0.0020457	0.013651	0.498247	44	4	-0.48968
NonTargeting_Human_0821	1	0.22533	0.22515	0.999997	492	1	-0.78389	0.77467	0.77517	0.999997	1452	0	-0.78389
TNFRSF8	15	0.22622	0.50777	0.999997	493	4	-0.20948	0.94863	0.97702	0.999997	1685	2	-0.20948
NonTargeting_Human_0414	1	0.22772	0.22766	0.999997	494	1	-0.47364	0.77228	0.77282	0.999997	1450	0	-0.47364
NonTargeting_Human_0737	1	0.22781	0.22774	0.999997	495	1	-0.85047	0.77219	0.77272	0.999997	1449	0	-0.85047
NonTargeting_Human_0289	1	0.22814	0.22822	0.999997	496	1	-0.67985	0.77186	0.77238	0.999997	1448	0	-0.67985
FRY	15	0.22993	0.51281	0.999997	497	5	-0.13234	0.26698	0.55533	0.999997	617	4	-0.13234
NonTargeting_Human_0339	1	0.23012	0.23007	0.999997	498	1	-0.64275	0.76988	0.77032	0.999997	1447	0	-0.64275
NonTargeting_Human_0135	1	0.23227	0.23222	0.999997	499	1	-0.61685	0.76773	0.76828	0.999997	1446	0	-0.61685
NonTargeting_Human_0965	1	0.2326	0.23266	0.999997	500	1	-0.68498	0.7674	0.76791	0.999997	1445	0	-0.68498
POLR2E	15	0.23283	0.51671	0.999997	501	5	0.17066	0.088462	0.27623	0.987471	274	6	0.17066
STARD4	15	0.23407	0.51848	0.999997	502	6	-0.22277	0.41692	0.70489	0.999997	875	4	-0.22277
MBTPS2	15	0.23508	0.52009	0.999997	503	2	-0.10693	0.3588	0.649	0.999997	776	4	-0.10693
NonTargeting_Human_0226	1	0.2354	0.2353	0.999997	504	1	-0.55027	0.7646	0.76488	0.999997	1443	0	-0.55027
NXF5	15	0.23556	0.52073	0.999997	505	5	0.48825	0.012601	0.06246	0.875876	87	8	0.48825
NonTargeting_Human_0319	1	0.23582	0.2357	0.999997	506	1	-0.55941	0.76418	0.76441	0.999997	1442	0	-0.55941
EIF6	12	0.23592	0.49708	0.999997	507	3	0.8615	0.093057	0.27203	0.987471	285	6	0.8615
NUDT21	14	0.2362	0.5128	0.999997	508	5	-0.41199	0.79362	0.91553	0.999997	1482	2	-0.41199
MORC2	15	0.23681	0.52271	0.999997	509	5	-0.12633	0.44219	0.7271	0.999997	918	4	-0.12633
METAP1	14	0.2374	0.51419	0.999997	510	5	-0.32298	0.87031	0.94299	0.999997	1587	2	-0.32298
ARHGEF35	15	0.23788	0.52425	0.999997	511	6	-0.3067	0.89396	0.95665	0.999997	1618	1	-0.3067
NonTargeting_Human_0762	1	0.23838	0.23827	0.999997	512	1	-0.63171	0.76162	0.76198	0.999997	1441	0	-0.63171
RBM4B	15	0.23867	0.52538	0.999997	513	5	0.00178	0.50447	0.76634	0.999997	1029	4	0.00178
NonTargeting_Human_0498	1	0.23945	0.23935	0.999997	514	1	-0.74246	0.76055	0.76092	0.999997	1440	0	-0.74246
LONP1	15	0.23955	0.52647	0.999997	515	6	-0.2535	0.99479	0.9947	0.999997	1729	0	-0.2535
NARF	15	0.24116	0.52885	0.999997	516	6	-0.14456	0.24428	0.5312	0.999997	580	1	-0.14456
NonTargeting_Human_0974	1	0.24118	0.24118	0.999997	517	1	-0.81604	0.75882	0.75927	0.999997	1438	0	-0.81604
HIST1H2BF	15	0.24151	0.52937	0.999997	518	5	-0.024849	0.024099	0.10404	0.915941	126	5	-0.024849
CMTR1	15	0.24189	0.52995	0.999997	519	3	0.48944	0.07937	0.25478	0.987471	247	7	0.48944
CPSF3L	15	0.24189	0.52995	0.999997	520	3	0.12644	0.012338	0.061364	0.875876	86	5	0.12644
FNTB	15	0.24307	0.53162	0.999997	521	5	0.088042	0.13931	0.37268	0.999997	373	2	0.088042
RAB28	15	0.24428	0.53319	0.999997	522	5	-0.24017	0.26916	0.55764	0.999997	621	1	-0.24017
VPS13C	15	0.24428	0.53319	0.999997	523	4	-0.084671	0.50173	0.76462	0.999997	1023	4	-0.084671
ZFR	15	0.24523	0.53442	0.999997	524	5	0.39713	0.078245	0.25207	0.987471	243	7	0.39713
HSPA8	15	0.24531	0.53452	0.999997	525	6	-0.4069	0.75293	0.90044	0.999997	1433	2	-0.4069
PRR20A	15	0.2457	0.53498	0.999997	526	3	0.37921	0.16781	0.41869	0.999997	445	6	0.37921
NonTargeting_Human_0813	1	0.24655	0.24652	0.999997	527	1	-0.59851	0.75345	0.75377	0.999997	1435	0	-0.59851
NonTargeting_Human_0805	1	0.24705	0.24707	0.999997	528	1	-0.42345	0.75295	0.75331	0.999997	1434	0	-0.42345
NonTargeting_Human_0705	1	0.24746	0.24751	0.999997	529	1	-0.38214	0.75254	0.75291	0.999997	1431	0	-0.38214
NonTargeting_Human_0601	1	0.24862	0.24858	0.999997	530	1	-0.59976	0.75138	0.75163	0.999997	1430	0	-0.59976
NonTargeting_Human_0892	1	0.24994	0.24982	0.999997	531	1	-0.80486	0.75006	0.75032	0.999997	1429	0	-0.80486
PES1	15	0.25045	0.54158	0.999997	532	3	0.93083	0.0025564	0.016798	0.560781	47	9	0.93083
GPR52	15	0.25136	0.5427	0.999997	533	6	-0.20217	0.1245	0.34851	0.999997	342	4	-0.20217
NonTargeting_Human_0025	1	0.25175	0.2516	0.999997	534	1	-0.61213	0.74825	0.74856	0.999997	1428	0	-0.61213
NonTargeting_Human_0570	1	0.25299	0.25286	0.999997	535	1	-0.5648	0.74701	0.74747	0.999997	1427	0	-0.5648
NonTargeting_Human_0673	1	0.25308	0.25292	0.999997	536	1	-0.47537	0.74692	0.74738	0.999997	1426	0	-0.47537
INSR	15	0.25347	0.54559	0.999997	537	6	-0.22859	0.68987	0.87539	0.999997	1351	2	-0.22859
NonTargeting_Human_0791	1	0.25398	0.25381	0.999997	538	1	-0.74546	0.74602	0.74649	0.999997	1425	0	-0.74546
NonTargeting_Human_0663	1	0.25407	0.25393	0.999997	539	1	-0.63291	0.74593	0.74643	0.999997	1424	0	-0.63291
NonTargeting_Human_0757	1	0.25423	0.25407	0.999997	540	1	-0.56914	0.74577	0.74625	0.999997	1423	0	-0.56914
KLC2	15	0.25477	0.54751	0.999997	541	4	-0.089629	0.98949	0.99047	0.999997	1718	1	-0.089629
COMMD3	15	0.25512	0.54797	0.999997	542	4	-0.27906	0.096577	0.29463	0.987471	291	4	-0.27906
NonTargeting_Human_0957	1	0.25514	0.25502	0.999997	543	1	-0.73508	0.74486	0.7453	0.999997	1422	0	-0.73508
EFCAB5	15	0.25517	0.54806	0.999997	544	2	0.2156	0.2313	0.5138	0.999997	550	3	0.2156
NDUFB10	15	0.25517	0.54806	0.999997	545	2	-0.21441	0.16742	0.41811	0.999997	443	4	-0.21441
NonTargeting_Human_0925	1	0.25564	0.25551	0.999997	546	1	-0.78029	0.74436	0.74476	0.999997	1421	0	-0.78029
ABHD14B	15	0.2562	0.54949	0.999997	547	2	0.50865	0.010919	0.055826	0.875876	78	9	0.50865
NonTargeting_Human_0108	1	0.25688	0.25671	0.999997	548	1	-0.55132	0.74312	0.74357	0.999997	1419	0	-0.55132
NonTargeting_Human_0589	1	0.25787	0.25788	0.999997	549	1	-0.57804	0.74213	0.74258	0.999997	1418	0	-0.57804
VOPP1	14	0.25796	0.53789	0.999997	550	4	0.091929	0.29624	0.57597	0.999997	673	5	0.091929
TSPAN11	15	0.25825	0.55231	0.999997	551	4	0.15987	0.053696	0.19238	0.97951	187	7	0.15987
NonTargeting_Human_0009	1	0.25828	0.25835	0.999997	552	1	-0.53516	0.74172	0.74216	0.999997	1417	0	-0.53516
RBBP5	15	0.25892	0.55318	0.999997	553	3	0.034624	0.10531	0.31421	0.991892	313	3	0.034624
NonTargeting_Human_0287	1	0.26034	0.26017	0.999997	554	1	-0.55053	0.73966	0.74004	0.999997	1415	0	-0.55053
NonTargeting_Human_0318	1	0.26076	0.26059	0.999997	555	1	-0.51913	0.73924	0.73964	0.999997	1414	0	-0.51913
TBXAS1	15	0.26104	0.55627	0.999997	556	5	0.097924	0.75289	0.90044	0.999997	1432	3	0.097924
NonTargeting_Human_0392	1	0.26117	0.26099	0.999997	557	1	-0.37756	0.73883	0.73931	0.999997	1413	0	-0.37756
NonTargeting_Human_0623	1	0.26133	0.26115	0.999997	558	1	-0.45148	0.73867	0.73914	0.999997	1412	0	-0.45148
NonTargeting_Human_0949	1	0.26142	0.26126	0.999997	559	1	-0.70172	0.73858	0.73903	0.999997	1411	0	-0.70172
NonTargeting_Human_0549	1	0.26191	0.2617	0.999997	560	1	-0.65696	0.73809	0.73851	0.999997	1410	0	-0.65696
WWP1	15	0.2634	0.55943	0.999997	561	6	-0.20165	0.68917	0.87509	0.999997	1347	2	-0.20165
PFDN6	15	0.26421	0.56047	0.999997	562	3	-0.025696	0.39726	0.68589	0.999997	835	3	-0.025696
NonTargeting_Human_0975	1	0.26431	0.26429	0.999997	563	1	-0.38307	0.73569	0.73608	0.999997	1409	0	-0.38307
GAGE1	14	0.26486	0.54551	0.999997	564	5	-0.34861	0.12352	0.33615	0.999997	341	3	-0.34861
NonTargeting_Human_0749	1	0.26522	0.26525	0.999997	565	1	-0.50436	0.73478	0.73508	0.999997	1408	0	-0.50436
SMARCB1	14	0.26596	0.54665	0.999997	566	5	-0.091942	0.3024	0.58274	0.999997	688	1	-0.091942
NonTargeting_Human_0738	1	0.26629	0.26636	0.999997	567	1	-0.68559	0.73371	0.73396	0.999997	1407	0	-0.68559
DOCK5	15	0.26637	0.5632	0.999997	568	4	-0.079209	0.26266	0.55086	0.999997	608	4	-0.079209
NonTargeting_Human_0636	1	0.2672	0.26721	0.999997	569	1	-0.65225	0.7328	0.73305	0.999997	1405	0	-0.65225
SPDYE2	15	0.26731	0.5641	0.999997	570	2	-0.052382	0.78475	0.91451	0.999997	1469	3	-0.052382
NonTargeting_Human_0004	1	0.26778	0.26778	0.999997	571	1	-0.38797	0.73222	0.73255	0.999997	1404	0	-0.38797
SEZ6L2	15	0.26975	0.56652	0.999997	572	5	0.14355	0.72091	0.88745	0.999997	1387	3	0.14355
NonTargeting_Human_0504	1	0.27116	0.27114	0.999997	573	1	-0.54556	0.72884	0.72922	0.999997	1400	0	-0.54556
PIK3R4	15	0.27119	0.56812	0.999997	574	4	0.2847	0.64106	0.85195	0.999997	1265	3	0.2847
NonTargeting_Human_0643	1	0.27157	0.27153	0.999997	575	1	-0.70342	0.72843	0.72877	0.999997	1399	0	-0.70342
NonTargeting_Human_0878	1	0.27191	0.27184	0.999997	576	1	-0.66943	0.72809	0.72847	0.999997	1398	0	-0.66943
NonTargeting_Human_0567	1	0.27405	0.27389	0.999997	577	1	-0.56257	0.72595	0.72643	0.999997	1396	0	-0.56257
MFAP1	15	0.27459	0.57183	0.999997	578	3	0.14885	0.043489	0.16596	0.962702	160	6	0.14885
NonTargeting_Human_0044	1	0.27488	0.27479	0.999997	579	1	-0.34796	0.72512	0.72569	0.999997	1394	0	-0.34796
NonTargeting_Human_0571	1	0.27504	0.27495	0.999997	580	1	-0.64179	0.72496	0.72549	0.999997	1393	0	-0.64179
NonTargeting_Human_0323	1	0.27513	0.27507	0.999997	581	1	-0.57031	0.72487	0.72541	0.999997	1392	0	-0.57031
NonTargeting_Human_0596	1	0.27521	0.27514	0.999997	582	1	-0.46481	0.72479	0.72532	0.999997	1391	0	-0.46481
PITPNM2	15	0.2755	0.57277	0.999997	583	4	0.18537	0.047829	0.17735	0.97864	172	5	0.18537
NonTargeting_Human_0470	1	0.27851	0.27836	0.999997	584	1	-0.37874	0.72149	0.72174	0.999997	1388	0	-0.37874
ATP5O	15	0.27931	0.57646	0.999997	585	4	0.15242	0.057264	0.20119	0.97951	200	6	0.15242
NonTargeting_Human_0865	1	0.28099	0.28064	0.999997	586	1	-0.44734	0.71901	0.71928	0.999997	1386	0	-0.44734
NonTargeting_Human_0466	1	0.28182	0.28147	0.999997	587	1	-0.6253	0.71818	0.7185	0.999997	1385	0	-0.6253
NonTargeting_Human_0337	1	0.28206	0.28172	0.999997	588	1	-0.28102	0.71794	0.71828	0.999997	1384	0	-0.28102
NonTargeting_Human_0368	1	0.28239	0.28202	0.999997	589	1	-0.51378	0.71761	0.71796	0.999997	1383	0	-0.51378
NonTargeting_Human_0577	1	0.28272	0.28228	0.999997	590	1	-0.66738	0.71728	0.71765	0.999997	1382	0	-0.66738
NonTargeting_Human_0789	1	0.28314	0.28267	0.999997	591	1	-0.62442	0.71686	0.71721	0.999997	1381	0	-0.62442
NonTargeting_Human_0477	1	0.28322	0.28275	0.999997	592	1	-0.43134	0.71678	0.7171	0.999997	1380	0	-0.43134
NonTargeting_Human_0573	1	0.28396	0.28357	0.999997	593	1	-0.52681	0.71604	0.71639	0.999997	1379	0	-0.52681
SULT1A2	15	0.2844	0.58148	0.999997	594	5	-0.17054	0.34336	0.63394	0.999997	752	5	-0.17054
NonTargeting_Human_0579	1	0.28487	0.28441	0.999997	595	1	-0.45382	0.71513	0.71539	0.999997	1377	0	-0.45382
SLC26A4	15	0.28498	0.58196	0.999997	596	4	0.24606	0.34919	0.63927	0.999997	760	4	0.24606
SLC38A5	15	0.28503	0.58197	0.999997	597	5	-0.33869	0.94779	0.97666	0.999997	1682	2	-0.33869
NonTargeting_Human_0578	1	0.2852	0.28477	0.999997	598	1	-0.56077	0.7148	0.71506	0.999997	1376	0	-0.56077
NonTargeting_Human_0022	1	0.28652	0.28617	0.999997	599	1	-0.392	0.71348	0.71381	0.999997	1375	0	-0.392
NonTargeting_Human_0937	1	0.28661	0.28626	0.999997	600	1	-0.40838	0.71339	0.71369	0.999997	1374	0	-0.40838
NonTargeting_Human_0916	1	0.28685	0.28645	0.999997	601	1	-0.40257	0.71315	0.7134	0.999997	1373	0	-0.40257
NonTargeting_Human_0011	1	0.2876	0.28726	0.999997	602	1	-0.48305	0.7124	0.7126	0.999997	1372	0	-0.48305
NonTargeting_Human_0982	1	0.28784	0.28753	0.999997	603	1	-0.59348	0.71216	0.71233	0.999997	1371	0	-0.59348
NonTargeting_Human_0533	1	0.28793	0.28762	0.999997	604	1	-0.56112	0.71207	0.71223	0.999997	1370	0	-0.56112
NonTargeting_Human_0474	1	0.28801	0.28772	0.999997	605	1	-0.55571	0.71199	0.71215	0.999997	1369	0	-0.55571
NonTargeting_Human_0408	1	0.28834	0.28808	0.999997	606	1	-0.60723	0.71166	0.71185	0.999997	1368	0	-0.60723
NonTargeting_Human_0081	1	0.28842	0.28817	0.999997	607	1	-0.62864	0.71158	0.71173	0.999997	1367	0	-0.62864
PSMD9	15	0.29104	0.58803	0.999997	608	4	-0.10411	0.29997	0.59013	0.999997	683	4	-0.10411
NonTargeting_Human_0188	1	0.29106	0.29071	0.999997	609	1	-0.60739	0.70894	0.70903	0.999997	1366	0	-0.60739
ATP6AP2	14	0.29144	0.5746	0.999997	610	5	0.28836	0.005144	0.028451	0.789372	57	4	0.28836
NonTargeting_Human_0818	1	0.29148	0.29113	0.999997	611	1	-0.45509	0.70852	0.70857	0.999997	1365	0	-0.45509
NonTargeting_Human_0555	1	0.29181	0.29148	0.999997	612	1	-0.34216	0.70819	0.70828	0.999997	1364	0	-0.34216
MRPL33	15	0.29217	0.58918	0.999997	613	4	-0.17545	0.14516	0.38275	0.999997	382	4	-0.17545
NonTargeting_Human_0535	1	0.29222	0.2919	0.999997	614	1	-0.57037	0.70778	0.70791	0.999997	1363	0	-0.57037
FAM134C	15	0.29238	0.58947	0.999997	615	5	-0.22466	0.94786	0.97669	0.999997	1683	2	-0.22466
TCERG1	15	0.29238	0.58947	0.999997	616	2	0.23951	0.3481	0.63834	0.999997	758	5	0.23951
NonTargeting_Human_0998	1	0.29247	0.29216	0.999997	617	1	-0.39575	0.70753	0.70772	0.999997	1362	0	-0.39575
NonTargeting_Human_0249	1	0.29305	0.29268	0.999997	618	1	-0.3465	0.70695	0.70712	0.999997	1361	0	-0.3465
NonTargeting_Human_0154	1	0.29313	0.29276	0.999997	619	1	-0.53022	0.70687	0.70704	0.999997	1360	0	-0.53022
NonTargeting_Human_0796	1	0.29371	0.29335	0.999997	620	1	-0.6176	0.70629	0.70651	0.999997	1359	0	-0.6176
SREBF1	15	0.2984	0.59512	0.999997	621	5	-0.23204	0.089012	0.27748	0.987471	275	5	-0.23204
TAOK1	15	0.29952	0.59634	0.999997	622	4	0.3101	0.19162	0.45607	0.999997	484	6	0.3101
NonTargeting_Human_0906	1	0.29957	0.29943	0.999997	623	0	-0.33631	0.70043	0.7009	0.999997	1357	0	-0.33631
NonTargeting_Human_0891	1	0.30056	0.30049	0.999997	624	0	-0.33982	0.69944	0.69982	0.999997	1356	0	-0.33982
DCAKD	15	0.30247	0.59926	0.999997	625	4	-0.027435	0.11339	0.32949	0.999997	329	6	-0.027435
CAB39	15	0.30792	0.60446	0.999997	626	4	-0.15706	0.034019	0.13798	0.955463	144	6	-0.15706
AIM1	15	0.30814	0.60471	0.999997	627	5	-0.03286	0.60498	0.82949	0.999997	1208	4	-0.03286
GYG2	15	0.30932	0.60578	0.999997	628	4	0.035776	0.5173	0.77414	0.999997	1056	3	0.035776
NonTargeting_Human_0920	1	0.30948	0.30893	0.999997	629	0	-0.46592	0.69052	0.69117	0.999997	1353	0	-0.46592
NonTargeting_Human_0526	1	0.30989	0.30932	0.999997	630	0	-0.49096	0.69011	0.69086	0.999997	1352	0	-0.49096
NonTargeting_Human_0481	1	0.31014	0.30965	0.999997	631	0	-0.46451	0.68986	0.69047	0.999997	1350	0	-0.46451
NonTargeting_Human_0012	1	0.31022	0.30975	0.999997	632	0	-0.43525	0.68978	0.69042	0.999997	1349	0	-0.43525
NonTargeting_Human_0254	1	0.31055	0.31006	0.999997	633	0	-0.48354	0.68945	0.6901	0.999997	1348	0	-0.48354
NonTargeting_Human_0486	1	0.31121	0.31069	0.999997	634	0	-0.52805	0.68879	0.68932	0.999997	1346	0	-0.52805
NonTargeting_Human_0781	1	0.31188	0.31136	0.999997	635	0	-0.41195	0.68812	0.68862	0.999997	1345	0	-0.41195
NonTargeting_Human_0701	1	0.31212	0.31165	0.999997	636	0	-0.27196	0.68788	0.68844	0.999997	1344	0	-0.27196
NonTargeting_Human_0955	1	0.31237	0.31192	0.999997	637	0	-0.52959	0.68763	0.68816	0.999997	1343	0	-0.52959
NonTargeting_Human_0620	1	0.31262	0.31213	0.999997	638	0	-0.51706	0.68738	0.68792	0.999997	1342	0	-0.51706
NonTargeting_Human_0503	1	0.31311	0.31262	0.999997	639	0	-0.47847	0.68689	0.68748	0.999997	1340	0	-0.47847
NonTargeting_Human_0331	1	0.31406	0.31356	0.999997	640	0	-0.42807	0.68594	0.68666	0.999997	1339	0	-0.42807
NonTargeting_Human_0935	1	0.31444	0.31387	0.999997	641	0	-0.40941	0.68556	0.68633	0.999997	1338	0	-0.40941
TBC1D25	15	0.3179	0.61425	0.999997	642	4	-0.32799	0.27926	0.56871	0.999997	638	2	-0.32799
NonTargeting_Human_0275	1	0.3179	0.31723	0.999997	643	0	-0.43986	0.6821	0.68275	0.999997	1334	0	-0.43986
GSK3B	15	0.31839	0.61462	0.999997	644	1	0.81151	4.7397e-05	0.00047753	0.04648	18	12	0.81151
BTF3	15	0.3185	0.6147	0.999997	645	5	0.11462	0.23556	0.51995	0.999997	558	5	0.11462
NonTargeting_Human_0090	1	0.31865	0.31809	0.999997	646	0	-0.47105	0.68135	0.68201	0.999997	1333	0	-0.47105
NonTargeting_Human_0215	1	0.31881	0.31827	0.999997	647	0	-0.44382	0.68119	0.68183	0.999997	1332	0	-0.44382
CTCF	14	0.31929	0.60478	0.999997	648	5	-0.15047	0.35827	0.64486	0.999997	775	3	-0.15047
NonTargeting_Human_0557	1	0.31939	0.31898	0.999997	649	0	-0.3532	0.68061	0.68131	0.999997	1331	0	-0.3532
NonTargeting_Human_0861	1	0.31947	0.31905	0.999997	650	0	-0.31586	0.68053	0.68124	0.999997	1330	0	-0.31586
NonTargeting_Human_0983	1	0.31972	0.31929	0.999997	651	0	-0.39594	0.68028	0.68095	0.999997	1329	0	-0.39594
NonTargeting_Human_0973	1	0.32046	0.32006	0.999997	652	0	-0.49774	0.67954	0.68005	0.999997	1328	0	-0.49774
NonTargeting_Human_0315	1	0.32079	0.32037	0.999997	653	0	-0.31653	0.67921	0.67972	0.999997	1326	0	-0.31653
NonTargeting_Human_0210	1	0.32096	0.32058	0.999997	654	0	-0.31716	0.67904	0.67955	0.999997	1325	0	-0.31716
USP9X	15	0.32234	0.61822	0.999997	655	5	-0.17587	0.83126	0.93625	0.999997	1536	1	-0.17587
NonTargeting_Human_0990	1	0.3236	0.32323	0.999997	656	0	-0.43187	0.6764	0.67699	0.999997	1323	0	-0.43187
NonTargeting_Human_0362	1	0.32418	0.32378	0.999997	657	0	-0.43997	0.67582	0.67638	0.999997	1322	0	-0.43997
NonTargeting_Human_0299	1	0.32443	0.32395	0.999997	658	0	-0.4837	0.67557	0.67619	0.999997	1321	0	-0.4837
CSNK2A2	15	0.32465	0.62043	0.999997	659	4	-0.054138	0.65956	0.86328	0.999997	1301	3	-0.054138
ATP13A1	15	0.32512	0.62089	0.999997	660	2	0.50965	0.0038895	0.023382	0.706299	53	8	0.50965
NonTargeting_Human_0245	1	0.32567	0.32523	0.999997	661	0	-0.4069	0.67433	0.67497	0.999997	1318	0	-0.4069
NonTargeting_Human_0912	1	0.32641	0.32598	0.999997	662	0	-0.45716	0.67359	0.67427	0.999997	1317	0	-0.45716
NonTargeting_Human_0193	1	0.32649	0.32607	0.999997	663	0	-0.32519	0.67351	0.67419	0.999997	1316	0	-0.32519
NonTargeting_Human_0604	1	0.32707	0.32657	0.999997	664	0	-0.42754	0.67293	0.67373	0.999997	1315	0	-0.42754
XAGE1A	15	0.32708	0.62276	0.999997	665	5	-0.0081482	0.67873	0.87094	0.999997	1324	3	-0.0081482
NonTargeting_Human_0345	1	0.3279	0.3275	0.999997	666	0	-0.39106	0.6721	0.67299	0.999997	1314	0	-0.39106
NonTargeting_Human_0144	1	0.32806	0.32766	0.999997	667	0	-0.38501	0.67194	0.67285	0.999997	1313	0	-0.38501
NonTargeting_Human_0382	1	0.33062	0.33018	0.999997	668	0	-0.39619	0.66938	0.67043	0.999997	1311	0	-0.39619
NonTargeting_Human_0359	1	0.33203	0.33155	0.999997	669	0	-0.43351	0.66797	0.66914	0.999997	1309	0	-0.43351
NonTargeting_Human_0269	1	0.33277	0.33229	0.999997	670	0	-0.23846	0.66723	0.66836	0.999997	1308	0	-0.23846
NonTargeting_Human_0730	1	0.33376	0.33338	0.999997	671	0	-0.26988	0.66624	0.66727	0.999997	1307	0	-0.26988
CCDC178	15	0.33551	0.63084	0.999997	672	5	-0.17343	0.28879	0.5784	0.999997	661	4	-0.17343
CWC22	13	0.33584	0.62046	0.999997	673	3	0.0082225	0.12994	0.34661	0.999997	354	5	0.0082225
NonTargeting_Human_0479	1	0.33591	0.33564	0.999997	674	0	-0.41201	0.66409	0.66514	0.999997	1305	0	-0.41201
NonTargeting_Human_0506	1	0.33715	0.33702	0.999997	675	0	-0.44235	0.66285	0.66393	0.999997	1304	0	-0.44235
NonTargeting_Human_0236	1	0.33872	0.33872	0.999997	676	0	-0.43322	0.66128	0.66219	0.999997	1302	0	-0.43322
SLC35A2	15	0.3398	0.63502	0.999997	677	3	0.50209	0.05003	0.18278	0.97864	176	7	0.50209
NonTargeting_Human_0976	1	0.3407	0.34076	0.999997	678	0	-0.29816	0.6593	0.66046	0.999997	1300	0	-0.29816
NonTargeting_Human_0667	1	0.34144	0.34154	0.999997	679	0	-0.38467	0.65856	0.65984	0.999997	1299	0	-0.38467
NonTargeting_Human_0429	1	0.34202	0.34212	0.999997	680	0	-0.27133	0.65798	0.65934	0.999997	1296	0	-0.27133
NonTargeting_Human_0376	1	0.34268	0.3429	0.999997	681	0	-0.31464	0.65732	0.65877	0.999997	1294	0	-0.31464
ATP6V1H	15	0.34298	0.63803	0.999997	682	4	0.41376	0.19667	0.46366	0.999997	492	4	0.41376
NonTargeting_Human_0945	1	0.34301	0.34333	0.999997	683	0	-0.38226	0.65699	0.65845	0.999997	1293	0	-0.38226
NonTargeting_Human_0139	1	0.34326	0.34364	0.999997	684	0	-0.35038	0.65674	0.6582	0.999997	1292	0	-0.35038
NonTargeting_Human_0172	1	0.3454	0.34566	0.999997	685	0	-0.31476	0.6546	0.65603	0.999997	1289	0	-0.31476
NonTargeting_Human_0055	1	0.34631	0.34651	0.999997	686	0	-0.32662	0.65369	0.65502	0.999997	1287	0	-0.32662
NonTargeting_Human_0158	1	0.3464	0.34658	0.999997	687	0	-0.27196	0.6536	0.65494	0.999997	1286	0	-0.27196
NonTargeting_Human_0150	1	0.34739	0.34748	0.999997	688	0	-0.29633	0.65261	0.65395	0.999997	1285	0	-0.29633
NonTargeting_Human_0456	1	0.34763	0.34771	0.999997	689	0	-0.30187	0.65237	0.65377	0.999997	1284	0	-0.30187
SQLE	15	0.34767	0.64223	0.999997	690	3	0.28606	0.1018	0.30648	0.987471	303	7	0.28606
NonTargeting_Human_0664	1	0.34805	0.34817	0.999997	691	0	-0.27501	0.65195	0.65335	0.999997	1283	0	-0.27501
ARIH1	15	0.34808	0.64263	0.999997	692	1	1.0482	5.4252e-05	0.00052839	0.048723	19	10	1.0482
NonTargeting_Human_0327	1	0.34846	0.34854	0.999997	693	0	-0.32532	0.65154	0.65299	0.999997	1282	0	-0.32532
SSX4	15	0.34891	0.64329	0.999997	694	5	-0.28633	0.80237	0.92259	0.999997	1492	2	-0.28633
NonTargeting_Human_0962	1	0.35094	0.35106	0.999997	695	0	-0.32921	0.64906	0.65065	0.999997	1278	0	-0.32921
NonTargeting_Human_0507	1	0.35119	0.35132	0.999997	696	0	-0.33724	0.64881	0.65035	0.999997	1277	0	-0.33724
NIPSNAP1	15	0.3514	0.64563	0.999997	697	4	0.17479	0.40159	0.69026	0.999997	843	4	0.17479
NXF2	14	0.35174	0.63923	0.999997	698	5	0.57937	0.019944	0.087914	0.875876	115	8	0.57937
NonTargeting_Human_0951	1	0.35201	0.35213	0.999997	699	0	-0.40338	0.64799	0.6495	0.999997	1275	0	-0.40338
NonTargeting_Human_0779	1	0.35292	0.35308	0.999997	700	0	-0.38672	0.64708	0.64853	0.999997	1273	0	-0.38672
NonTargeting_Human_0013	1	0.35325	0.35338	0.999997	701	0	-0.27549	0.64675	0.64824	0.999997	1272	0	-0.27549
NonTargeting_Human_0511	1	0.3554	0.35547	0.999997	702	0	-0.31997	0.6446	0.64601	0.999997	1271	0	-0.31997
NonTargeting_Human_0888	1	0.35564	0.35578	0.999997	703	0	-0.3822	0.64436	0.64573	0.999997	1270	0	-0.3822
NonTargeting_Human_0518	1	0.35622	0.35631	0.999997	704	0	-0.3014	0.64378	0.64509	0.999997	1269	0	-0.3014
NonTargeting_Human_0709	1	0.35647	0.3565	0.999997	705	0	-0.37962	0.64353	0.64486	0.999997	1268	0	-0.37962
OLR1	15	0.35702	0.65113	0.999997	706	3	0.34634	0.10074	0.30394	0.987471	299	6	0.34634
NonTargeting_Human_0437	1	0.35812	0.35808	0.999997	707	0	-0.34848	0.64188	0.64319	0.999997	1266	0	-0.34848
SPATA25	15	0.35921	0.65315	0.999997	708	3	0.056873	0.92708	0.96792	0.999997	1658	2	0.056873
NonTargeting_Human_0180	1	0.3601	0.36002	0.999997	709	0	-0.26827	0.6399	0.64124	0.999997	1263	0	-0.26827
NonTargeting_Human_0014	1	0.36134	0.36117	0.999997	710	0	-0.2536	0.63866	0.63987	0.999997	1262	0	-0.2536
NonTargeting_Human_0149	1	0.36233	0.36215	0.999997	711	0	-0.26036	0.63767	0.63893	0.999997	1260	0	-0.26036
NonTargeting_Human_0441	1	0.36258	0.36241	0.999997	712	0	-0.27508	0.63742	0.6387	0.999997	1259	0	-0.27508
NonTargeting_Human_0659	1	0.36291	0.36273	0.999997	713	0	-0.32906	0.63709	0.63832	0.999997	1258	0	-0.32906
NonTargeting_Human_0039	1	0.36299	0.36283	0.999997	714	0	-0.32633	0.63701	0.63822	0.999997	1257	0	-0.32633
DROSHA	15	0.36385	0.65751	0.999997	715	4	-0.057593	0.14829	0.38817	0.999997	395	3	-0.057593
NonTargeting_Human_0556	1	0.36456	0.36441	0.999997	716	0	-0.31582	0.63544	0.63672	0.999997	1254	0	-0.31582
NonTargeting_Human_0994	1	0.36473	0.36455	0.999997	717	0	-0.31468	0.63527	0.63656	0.999997	1253	0	-0.31468
NonTargeting_Human_0782	1	0.36489	0.36472	0.999997	718	0	-0.34837	0.63511	0.63638	0.999997	1252	0	-0.34837
UBA2	15	0.36491	0.65842	0.999997	719	3	0.54644	0.058084	0.20326	0.97951	203	7	0.54644
C21orf59	15	0.36605	0.65946	0.999997	720	5	0.15037	0.012928	0.063772	0.875876	88	2	0.15037
NonTargeting_Human_0034	1	0.36729	0.36726	0.999997	721	0	-0.29405	0.63271	0.63404	0.999997	1251	0	-0.29405
NonTargeting_Human_0283	1	0.36745	0.36744	0.999997	722	0	-0.22462	0.63255	0.63383	0.999997	1250	0	-0.22462
NonTargeting_Human_0061	1	0.36795	0.36794	0.999997	723	0	-0.28454	0.63205	0.63325	0.999997	1249	0	-0.28454
S100A14	15	0.36887	0.66202	0.999997	724	5	-0.07546	0.79371	0.9184	0.999997	1483	3	-0.07546
CEP120	15	0.36972	0.66271	0.999997	725	5	-0.025653	0.094081	0.28899	0.987471	287	4	-0.025653
NonTargeting_Human_0233	1	0.37059	0.37051	0.999997	726	0	-0.24506	0.62941	0.63052	0.999997	1244	0	-0.24506
NonTargeting_Human_0652	1	0.37084	0.37075	0.999997	727	0	-0.28339	0.62916	0.63028	0.999997	1243	0	-0.28339
NonTargeting_Human_0136	1	0.37162	0.37158	0.999997	728	0	-0.33295	0.62838	0.62939	0.999997	1240	0	-0.33295
NonTargeting_Human_0799	1	0.3739	0.37392	0.999997	729	0	-0.32457	0.6261	0.62704	0.999997	1238	0	-0.32457
NonTargeting_Human_0598	1	0.37398	0.37405	0.999997	730	0	-0.31958	0.62602	0.62693	0.999997	1237	0	-0.31958
NonTargeting_Human_0406	1	0.37414	0.37421	0.999997	731	0	-0.24573	0.62586	0.62676	0.999997	1236	0	-0.24573
TRA2B	15	0.37423	0.66692	0.999997	732	5	-0.37182	0.77597	0.9104	0.999997	1453	2	-0.37182
NonTargeting_Human_0040	1	0.37431	0.37442	0.999997	733	0	-0.23497	0.62569	0.62659	0.999997	1235	0	-0.23497
NonTargeting_Human_0051	1	0.37629	0.37638	0.999997	734	0	-0.28881	0.62371	0.62449	0.999997	1234	0	-0.28881
ZNF263	15	0.37654	0.66903	0.999997	735	4	0.027834	0.64047	0.85156	0.999997	1264	3	0.027834
NonTargeting_Human_0632	1	0.37695	0.37701	0.999997	736	0	-0.22989	0.62305	0.62377	0.999997	1233	0	-0.22989
RPP38	14	0.37704	0.66514	0.999997	737	3	0.14869	0.2404	0.51102	0.999997	567	4	0.14869
ELP5	15	0.37704	0.66947	0.999997	738	4	0.39464	0.60312	0.82833	0.999997	1203	3	0.39464
BOLA2	15	0.37706	0.6695	0.999997	739	5	-0.085423	0.93069	0.96937	0.999997	1661	2	-0.085423
FAM126A	15	0.37724	0.66968	0.999997	740	4	0.060368	0.099479	0.30121	0.987471	295	6	0.060368
NonTargeting_Human_0890	1	0.37736	0.3774	0.999997	741	0	-0.18141	0.62264	0.62336	0.999997	1232	0	-0.18141
NonTargeting_Human_0952	1	0.37802	0.37807	0.999997	742	0	-0.12489	0.62198	0.62272	0.999997	1230	0	-0.12489
NonTargeting_Human_0027	1	0.37893	0.37902	0.999997	743	0	-0.25962	0.62107	0.6218	0.999997	1228	0	-0.25962
NonTargeting_Human_0078	1	0.38001	0.38019	0.999997	744	0	-0.29941	0.61999	0.62061	0.999997	1227	0	-0.29941
NonTargeting_Human_0986	1	0.38141	0.38173	0.999997	745	0	-0.22806	0.61859	0.61923	0.999997	1226	0	-0.22806
LSM7	15	0.38173	0.67372	0.999997	746	2	0.68997	0.0024389	0.016245	0.560781	46	10	0.68997
CDT1	15	0.38173	0.67372	0.999997	747	3	0.67628	0.018591	0.084308	0.875876	111	8	0.67628
CCDC22	15	0.38255	0.6745	0.999997	748	4	-0.087849	0.69621	0.87784	0.999997	1354	3	-0.087849
NonTargeting_Human_0544	1	0.38265	0.38299	0.999997	749	0	-0.30484	0.61735	0.61809	0.999997	1225	0	-0.30484
NonTargeting_Human_0132	1	0.38331	0.38364	0.999997	750	0	-0.26055	0.61669	0.61753	0.999997	1224	0	-0.26055
MTHFD1	15	0.38612	0.67783	0.999997	751	5	-0.21181	0.83391	0.93758	0.999997	1538	3	-0.21181
NonTargeting_Human_0786	1	0.38678	0.38711	0.999997	752	0	-0.28703	0.61322	0.61385	0.999997	1222	0	-0.28703
NonTargeting_Human_0010	1	0.38736	0.38774	0.999997	753	0	-0.22457	0.61264	0.61329	0.999997	1220	0	-0.22457
ANAPC16	15	0.38763	0.6791	0.999997	754	4	0.009881	0.12956	0.35644	0.999997	353	2	0.009881
NonTargeting_Human_0530	1	0.38785	0.38827	0.999997	755	0	-0.14326	0.61215	0.61276	0.999997	1219	0	-0.14326
NonTargeting_Human_0390	1	0.38967	0.39002	0.999997	756	0	-0.26084	0.61033	0.61106	0.999997	1218	0	-0.26084
NonTargeting_Human_0405	1	0.39041	0.39074	0.999997	757	0	-0.2254	0.60959	0.61034	0.999997	1216	0	-0.2254
NonTargeting_Human_0393	1	0.39083	0.39117	0.999997	758	0	-0.26401	0.60917	0.60993	0.999997	1215	0	-0.26401
NonTargeting_Human_0894	1	0.39149	0.39185	0.999997	759	0	-0.23029	0.60851	0.60927	0.999997	1214	0	-0.23029
NonTargeting_Human_0461	1	0.39231	0.39273	0.999997	760	0	-0.1826	0.60769	0.60842	0.999997	1213	0	-0.1826
NonTargeting_Human_0464	1	0.39322	0.3936	0.999997	761	0	-0.26425	0.60678	0.60743	0.999997	1212	0	-0.26425
NonTargeting_Human_0631	1	0.39413	0.39447	0.999997	762	0	-0.21608	0.60587	0.60657	0.999997	1211	0	-0.21608
NonTargeting_Human_0030	1	0.39446	0.39477	0.999997	763	0	-0.22004	0.60554	0.6063	0.999997	1210	0	-0.22004
NonTargeting_Human_0930	1	0.39462	0.39491	0.999997	764	0	-0.17868	0.60538	0.60617	0.999997	1209	0	-0.17868
NonTargeting_Human_0370	1	0.39504	0.39534	0.999997	765	0	-0.20278	0.60496	0.60584	0.999997	1207	0	-0.20278
NonTargeting_Human_0423	1	0.39545	0.39568	0.999997	766	0	-0.20398	0.60455	0.60543	0.999997	1205	0	-0.20398
NonTargeting_Human_0529	1	0.39578	0.396	0.999997	767	0	-0.1678	0.60422	0.60496	0.999997	1204	0	-0.1678
NonTargeting_Human_0194	1	0.39727	0.39749	0.999997	768	0	-0.2665	0.60273	0.60349	0.999997	1202	0	-0.2665
NonTargeting_Human_0058	1	0.39851	0.39881	0.999997	769	0	-0.21948	0.60149	0.60218	0.999997	1198	0	-0.21948
TNFRSF4	15	0.39863	0.68935	0.999997	770	3	-0.063629	0.62868	0.84441	0.999997	1242	4	-0.063629
MKL1	15	0.39948	0.69012	0.999997	771	5	-0.22105	0.5574	0.79917	0.999997	1129	4	-0.22105
NonTargeting_Human_0531	1	0.3995	0.39956	0.999997	772	0	-0.22939	0.6005	0.60109	0.999997	1197	0	-0.22939
NonTargeting_Human_0672	1	0.39958	0.39964	0.999997	773	0	-0.22115	0.60042	0.60102	0.999997	1196	0	-0.22115
NonTargeting_Human_0969	1	0.39999	0.40012	0.999997	774	0	-0.25854	0.60001	0.6006	0.999997	1195	0	-0.25854
AQP10	15	0.4	0.69061	0.999997	775	3	-0.10973	0.91477	0.96343	0.999997	1635	2	-0.10973
NonTargeting_Human_0609	1	0.40007	0.40021	0.999997	776	0	-0.20743	0.59993	0.60045	0.999997	1194	0	-0.20743
NonTargeting_Human_0886	1	0.40181	0.4019	0.999997	777	0	-0.2224	0.59819	0.59864	0.999997	1193	0	-0.2224
SVOP	15	0.40379	0.69434	0.999997	778	4	0.4072	0.029872	0.12422	0.955463	137	8	0.4072
RNPEP	15	0.40489	0.69533	0.999997	779	5	-0.32906	0.82002	0.93109	0.999997	1520	3	-0.32906
KIF3C	15	0.40546	0.6958	0.999997	780	5	-0.077467	0.792	0.9176	0.999997	1480	1	-0.077467
NonTargeting_Human_0832	1	0.40693	0.40695	0.999997	781	0	-0.16986	0.59307	0.59351	0.999997	1191	0	-0.16986
NonTargeting_Human_0106	1	0.40709	0.40719	0.999997	782	0	-0.16041	0.59291	0.59338	0.999997	1190	0	-0.16041
NonTargeting_Human_0760	1	0.40718	0.40725	0.999997	783	0	-0.22471	0.59282	0.59331	0.999997	1189	0	-0.22471
TMOD2	15	0.40723	0.69747	0.999997	784	4	0.013267	0.11685	0.33521	0.999997	335	6	0.013267
LSS	15	0.40736	0.69758	0.999997	785	4	0.02628	0.63166	0.8465	0.999997	1248	4	0.02628
NonTargeting_Human_0719	1	0.40759	0.4078	0.999997	786	0	-0.17047	0.59241	0.59289	0.999997	1188	0	-0.17047
NonTargeting_Human_0126	1	0.40808	0.40819	0.999997	787	0	-0.21224	0.59192	0.59234	0.999997	1187	0	-0.21224
NonTargeting_Human_0482	1	0.40825	0.40836	0.999997	788	0	-0.23467	0.59175	0.59215	0.999997	1186	0	-0.23467
DCPS	15	0.40846	0.69859	0.999997	789	1	0.23085	0.0092647	0.048338	0.875876	76	6	0.23085
NonTargeting_Human_0094	1	0.40883	0.40898	0.999997	790	0	-0.17381	0.59117	0.59163	0.999997	1185	0	-0.17381
NonTargeting_Human_0880	1	0.40891	0.40908	0.999997	791	0	-0.2237	0.59109	0.59157	0.999997	1184	0	-0.2237
NonTargeting_Human_0839	1	0.40908	0.4093	0.999997	792	0	-0.20122	0.59092	0.59141	0.999997	1183	0	-0.20122
SPI1	15	0.41003	0.70002	0.999997	793	2	0.030681	0.026305	0.11182	0.93067	130	3	0.030681
NonTargeting_Human_0561	1	0.41007	0.41029	0.999997	794	0	-0.21437	0.58993	0.59047	0.999997	1182	0	-0.21437
GTDC2	15	0.41035	0.70033	0.999997	795	4	-0.17463	0.28687	0.57645	0.999997	655	3	-0.17463
NonTargeting_Human_0164	1	0.41106	0.41124	0.999997	796	0	-0.22295	0.58894	0.5894	0.999997	1180	0	-0.22295
MCCC2	15	0.41145	0.70125	0.999997	797	5	-0.21019	0.044476	0.16855	0.962702	164	4	-0.21019
ASH2L	15	0.41185	0.70158	0.999997	798	4	0.23441	0.087821	0.27483	0.987471	270	5	0.23441
NonTargeting_Human_0123	1	0.41321	0.41332	0.999997	799	0	-0.12323	0.58679	0.5873	0.999997	1178	0	-0.12323
NonTargeting_Human_0096	1	0.41329	0.41343	0.999997	800	0	-0.21025	0.58671	0.5872	0.999997	1177	0	-0.21025
YME1L1	15	0.41366	0.70335	0.999997	801	4	-0.11675	0.083861	0.26566	0.987471	260	4	-0.11675
NonTargeting_Human_0225	1	0.41436	0.41447	0.999997	802	0	-0.20618	0.58564	0.58609	0.999997	1176	0	-0.20618
NonTargeting_Human_0896	1	0.41494	0.41503	0.999997	803	0	-0.16733	0.58506	0.58547	0.999997	1175	0	-0.16733
MYOZ3	15	0.41675	0.70616	0.999997	804	2	0.56881	0.0013778	0.0094178	0.434211	37	8	0.56881
LGR5	15	0.41706	0.70643	0.999997	805	4	-0.14421	0.052216	0.18844	0.97864	182	4	-0.14421
NonTargeting_Human_0847	1	0.41709	0.41725	0.999997	806	0	-0.17978	0.58291	0.5834	0.999997	1174	0	-0.17978
GCFC2	15	0.41728	0.70662	0.999997	807	3	0.21741	0.14606	0.38429	0.999997	389	6	0.21741
NonTargeting_Human_0648	1	0.41791	0.4181	0.999997	808	0	-0.18544	0.58209	0.58257	0.999997	1172	0	-0.18544
KCNK4	15	0.41814	0.70751	0.999997	809	3	0.13516	0.48764	0.75576	0.999997	1000	2	0.13516
NonTargeting_Human_0045	1	0.41923	0.4195	0.999997	810	0	-0.15416	0.58077	0.58123	0.999997	1170	0	-0.15416
NonTargeting_Human_0985	1	0.41998	0.42024	0.999997	811	0	-0.20247	0.58002	0.58059	0.999997	1169	0	-0.20247
CBWD1	15	0.42225	0.71135	0.999997	812	5	-0.0018543	0.16632	0.41638	0.999997	440	5	-0.0018543
NonTargeting_Human_0341	1	0.42287	0.42296	0.999997	813	0	-0.14084	0.57713	0.57736	0.999997	1168	0	-0.14084
NonTargeting_Human_0710	1	0.42452	0.42448	0.999997	814	0	-0.19673	0.57548	0.57571	0.999997	1166	0	-0.19673
NonTargeting_Human_0047	1	0.4246	0.42459	0.999997	815	0	-0.17428	0.5754	0.57561	0.999997	1165	0	-0.17428
NonTargeting_Human_0268	1	0.42568	0.42555	0.999997	816	0	-0.19462	0.57432	0.57451	0.999997	1161	0	-0.19462
NonTargeting_Human_0686	1	0.42584	0.42575	0.999997	817	0	-0.17696	0.57416	0.57437	0.999997	1160	0	-0.17696
hsa-mir-638	15	0.42691	0.71568	0.999997	818	4	0.35762	0.014499	0.069349	0.875876	97	7	0.35762
NonTargeting_Human_0062	1	0.42766	0.4275	0.999997	819	0	-0.17084	0.57234	0.57252	0.999997	1159	0	-0.17084
NonTargeting_Human_0265	1	0.42815	0.42797	0.999997	820	0	-0.15554	0.57185	0.57203	0.999997	1158	0	-0.15554
NonTargeting_Human_0810	1	0.42898	0.42876	0.999997	821	0	-0.17652	0.57102	0.57121	0.999997	1157	0	-0.17652
RAB23	15	0.42935	0.71781	0.999997	822	4	-0.060629	0.62841	0.84428	0.999997	1241	4	-0.060629
HNRNPM	13	0.43033	0.69565	0.999997	823	3	0.54723	0.014004	0.06515	0.875876	94	6	0.54723
NonTargeting_Human_0264	1	0.43096	0.43079	0.999997	824	0	-0.17993	0.56904	0.56915	0.999997	1156	0	-0.17993
NonTargeting_Human_0934	1	0.43228	0.43204	0.999997	825	0	-0.17798	0.56772	0.56787	0.999997	1153	0	-0.17798
RAB13	15	0.43257	0.72074	0.999997	826	4	0.089178	0.040704	0.15844	0.960108	157	4	0.089178
NonTargeting_Human_0266	1	0.43303	0.43277	0.999997	827	0	-0.158	0.56697	0.56713	0.999997	1152	0	-0.158
NonTargeting_Human_0901	1	0.43311	0.43284	0.999997	828	0	-0.17336	0.56689	0.56704	0.999997	1151	0	-0.17336
NonTargeting_Human_0764	1	0.43377	0.43355	0.999997	829	0	-0.10095	0.56623	0.56643	0.999997	1150	0	-0.10095
NonTargeting_Human_0521	1	0.43402	0.43382	0.999997	830	0	-0.16799	0.56598	0.56612	0.999997	1149	0	-0.16799
NonTargeting_Human_0929	1	0.43435	0.43417	0.999997	831	0	-0.1401	0.56565	0.56579	0.999997	1148	0	-0.1401
NonTargeting_Human_0102	1	0.43517	0.43503	0.999997	832	0	-0.13907	0.56483	0.56499	0.999997	1147	0	-0.13907
NonTargeting_Human_0313	1	0.43534	0.43516	0.999997	833	0	-0.1092	0.56466	0.5648	0.999997	1146	0	-0.1092
NonTargeting_Human_0754	1	0.43542	0.43525	0.999997	834	0	-0.1296	0.56458	0.56471	0.999997	1145	0	-0.1296
ALG2	14	0.43544	0.71361	0.999997	835	4	-0.25532	0.98609	0.98673	0.999997	1716	1	-0.25532
NonTargeting_Human_0551	1	0.43583	0.43566	0.999997	836	0	-0.11591	0.56417	0.56429	0.999997	1144	0	-0.11591
GTF2A2	15	0.43592	0.72355	0.999997	837	3	0.44238	0.016838	0.077973	0.875876	105	8	0.44238
NonTargeting_Human_0239	1	0.43608	0.43593	0.999997	838	0	-0.15693	0.56392	0.56401	0.999997	1143	0	-0.15693
NonTargeting_Human_0260	1	0.43641	0.43619	0.999997	839	0	-0.13189	0.56359	0.56365	0.999997	1142	0	-0.13189
INO80D	15	0.43674	0.72418	0.999997	840	3	-0.063142	0.54473	0.79091	0.999997	1107	4	-0.063142
NonTargeting_Human_0970	1	0.43724	0.43704	0.999997	841	0	-0.027633	0.56276	0.56279	0.999997	1141	0	-0.027633
NonTargeting_Human_0356	1	0.43732	0.43714	0.999997	842	0	-0.16129	0.56268	0.56274	0.999997	1140	0	-0.16129
NonTargeting_Human_0767	1	0.43781	0.43766	0.999997	843	0	-0.14742	0.56219	0.5622	0.999997	1139	0	-0.14742
NonTargeting_Human_0725	1	0.43848	0.4383	0.999997	844	0	-0.15932	0.56152	0.56147	0.999997	1138	0	-0.15932
NonTargeting_Human_0173	1	0.43963	0.43936	0.999997	845	0	-0.15617	0.56037	0.56022	0.999997	1136	0	-0.15617
NonTargeting_Human_0187	1	0.44021	0.43992	0.999997	846	0	-0.1551	0.55979	0.55964	0.999997	1135	0	-0.1551
NonTargeting_Human_0278	1	0.44054	0.4402	0.999997	847	0	-0.12956	0.55946	0.55934	0.999997	1134	0	-0.12956
CHRNA3	15	0.4406	0.72755	0.999997	848	3	0.20667	0.32812	0.61884	0.999997	729	5	0.20667
NonTargeting_Human_0280	1	0.44128	0.441	0.999997	849	0	-0.14069	0.55872	0.55859	0.999997	1132	0	-0.14069
NonTargeting_Human_0824	1	0.44137	0.44109	0.999997	850	0	-0.15204	0.55863	0.55852	0.999997	1131	0	-0.15204
NonTargeting_Human_0169	1	0.44194	0.44167	0.999997	851	0	-0.14753	0.55806	0.55791	0.999997	1130	0	-0.14753
NonTargeting_Human_0253	1	0.44318	0.44308	0.999997	852	0	-0.12195	0.55682	0.55663	0.999997	1128	0	-0.12195
NonTargeting_Human_0514	1	0.44384	0.44367	0.999997	853	0	-0.14361	0.55616	0.556	0.999997	1127	0	-0.14361
NonTargeting_Human_0209	1	0.44492	0.44477	0.999997	854	0	-0.14577	0.55508	0.55479	0.999997	1126	0	-0.14577
NonTargeting_Human_0073	1	0.44591	0.44579	0.999997	855	0	-0.137	0.55409	0.55371	0.999997	1125	0	-0.137
hsa-mir-6770-1	10	0.44652	0.67292	0.999997	856	2	-0.12628	0.25419	0.49028	0.999997	593	3	-0.12628
NonTargeting_Human_0050	1	0.44731	0.44717	0.999997	857	0	-0.10476	0.55269	0.55235	0.999997	1122	0	-0.10476
LDLR	15	0.44769	0.73366	0.999997	858	4	-0.23212	0.53377	0.78414	0.999997	1085	2	-0.23212
URI1	15	0.44812	0.73402	0.999997	859	4	0.00077731	0.82955	0.93531	0.999997	1533	2	0.00077731
MRPL21	15	0.44842	0.7343	0.999997	860	4	-0.27501	0.38449	0.6735	0.999997	816	4	-0.27501
NonTargeting_Human_0727	1	0.44855	0.44838	0.999997	861	0	-0.12713	0.55145	0.55098	0.999997	1120	0	-0.12713
TBX6	15	0.44857	0.73448	0.999997	862	2	0.024161	0.67946	0.8712	0.999997	1327	2	0.024161
NAA38	15	0.44883	0.73471	0.999997	863	3	0.53923	0.083311	0.26439	0.987471	257	7	0.53923
NonTargeting_Human_0016	1	0.44946	0.44927	0.999997	864	0	-0.13466	0.55054	0.55014	0.999997	1119	0	-0.13466
MGAT1	15	0.44966	0.7354	0.999997	865	4	-0.13908	0.94968	0.9775	0.999997	1689	2	-0.13908
NonTargeting_Human_0462	1	0.45045	0.45016	0.999997	866	0	-0.12876	0.54955	0.54912	0.999997	1118	0	-0.12876
NonTargeting_Human_0167	1	0.45062	0.45029	0.999997	867	0	-0.12136	0.54938	0.54894	0.999997	1117	0	-0.12136
NonTargeting_Human_0259	1	0.45086	0.4505	0.999997	868	0	-0.12386	0.54914	0.54867	0.999997	1116	0	-0.12386
LYZ	15	0.45098	0.73655	0.999997	869	3	0.32575	0.15841	0.40413	0.999997	422	6	0.32575
NonTargeting_Human_0961	1	0.45119	0.45093	0.999997	870	0	-0.12805	0.54881	0.54833	0.999997	1115	0	-0.12805
ELOF1	15	0.45184	0.73728	0.999997	871	4	-0.12442	0.091219	0.28253	0.987471	284	6	-0.12442
NonTargeting_Human_0812	1	0.4526	0.45239	0.999997	872	0	-0.1082	0.5474	0.54699	0.999997	1114	0	-0.1082
CTRL	15	0.45285	0.73815	0.999997	873	5	-0.028807	0.031089	0.12845	0.955463	139	6	-0.028807
NonTargeting_Human_0155	1	0.45342	0.45313	0.999997	874	0	-0.11342	0.54658	0.5462	0.999997	1113	0	-0.11342
MED8	15	0.45354	0.73877	0.999997	875	4	0.16566	0.29598	0.58591	0.999997	671	5	0.16566
BST2	15	0.45386	0.73905	0.999997	876	3	0.14878	0.068541	0.22905	0.987471	221	6	0.14878
NonTargeting_Human_0310	1	0.45433	0.45413	0.999997	877	0	-0.12321	0.54567	0.54526	0.999997	1112	0	-0.12321
NELFA	15	0.4545	0.73959	0.999997	878	3	0.10558	0.32616	0.61664	0.999997	726	4	0.10558
NonTargeting_Human_0574	1	0.45474	0.4546	0.999997	879	0	-0.12081	0.54526	0.54479	0.999997	1110	0	-0.12081
hsa-mir-6886	13	0.45478	0.71497	0.999997	880	3	-0.080441	0.81624	0.91774	0.999997	1517	2	-0.080441
NonTargeting_Human_0255	1	0.45507	0.45498	0.999997	881	0	-0.1205	0.54493	0.54435	0.999997	1109	0	-0.1205
NonTargeting_Human_0297	1	0.45516	0.45506	0.999997	882	0	-0.069992	0.54484	0.54427	0.999997	1108	0	-0.069992
NonTargeting_Human_0377	1	0.45582	0.45575	0.999997	883	0	-0.11842	0.54418	0.54356	0.999997	1105	0	-0.11842
NonTargeting_Human_0835	1	0.45648	0.45636	0.999997	884	0	-0.099628	0.54352	0.54291	0.999997	1104	0	-0.099628
NonTargeting_Human_0770	1	0.45673	0.4566	0.999997	885	0	-0.10153	0.54327	0.54264	0.999997	1103	0	-0.10153
CIAPIN1	15	0.45713	0.74172	0.999997	886	5	0.14363	0.059861	0.20794	0.984921	205	4	0.14363
NonTargeting_Human_0633	1	0.45772	0.45754	0.999997	887	0	-0.11254	0.54228	0.54163	0.999997	1102	0	-0.11254
NonTargeting_Human_0720	1	0.45805	0.45777	0.999997	888	0	-0.11261	0.54195	0.54127	0.999997	1101	0	-0.11261
NonTargeting_Human_0065	1	0.45854	0.45828	0.999997	889	0	-0.085693	0.54146	0.54081	0.999997	1100	0	-0.085693
ABCG5	15	0.45871	0.74324	0.999997	890	2	0.15348	0.19943	0.46781	0.999997	499	5	0.15348
C1GALT1	15	0.45884	0.74331	0.999997	891	5	-0.38599	0.47659	0.74846	0.999997	976	2	-0.38599
DNAL4	15	0.4597	0.74402	0.999997	892	5	-0.30426	0.90124	0.9589	0.999997	1626	2	-0.30426
RPL17	13	0.46057	0.71938	0.999997	893	1	0.12052	0.48396	0.73477	0.999997	989	4	0.12052
NDUFV1	15	0.4608	0.745	0.999997	894	2	0.64913	0.0088588	0.046411	0.875876	71	7	0.64913
NonTargeting_Human_0279	1	0.46259	0.46251	0.999997	895	0	-0.10075	0.53741	0.53666	0.999997	1095	0	-0.10075
NonTargeting_Human_0024	1	0.46284	0.46278	0.999997	896	0	-0.041937	0.53716	0.53648	0.999997	1094	0	-0.041937
NonTargeting_Human_0443	1	0.46309	0.46305	0.999997	897	0	-0.093376	0.53691	0.53624	0.999997	1093	0	-0.093376
NonTargeting_Human_0634	1	0.46317	0.46315	0.999997	898	0	-0.093687	0.53683	0.53617	0.999997	1092	0	-0.093687
COA4	15	0.46362	0.74757	0.999997	899	4	0.1177	0.88193	0.95314	0.999997	1605	1	0.1177
NonTargeting_Human_0887	1	0.46432	0.46437	0.999997	900	0	-0.074241	0.53568	0.53501	0.999997	1090	0	-0.074241
NonTargeting_Human_0431	1	0.46474	0.46474	0.999997	901	0	-0.093011	0.53526	0.53453	0.999997	1088	0	-0.093011
NonTargeting_Human_0743	1	0.46515	0.46515	0.999997	902	0	-0.07046	0.53485	0.53413	0.999997	1087	0	-0.07046
NonTargeting_Human_0076	1	0.46523	0.46526	0.999997	903	0	-0.089652	0.53477	0.53403	0.999997	1086	0	-0.089652
HDAC6	15	0.46597	0.74958	0.999997	904	5	-0.13833	0.079214	0.25438	0.987471	246	5	-0.13833
NonTargeting_Human_0532	1	0.46763	0.46736	0.999997	905	0	-0.07344	0.53237	0.53185	0.999997	1082	0	-0.07344
ELP3	15	0.46888	0.75207	0.999997	906	4	0.34227	0.017257	0.079561	0.875876	107	6	0.34227
NonTargeting_Human_0243	1	0.46895	0.46866	0.999997	907	0	-0.082251	0.53105	0.53055	0.999997	1080	0	-0.082251
NonTargeting_Human_0539	1	0.46969	0.46943	0.999997	908	0	-0.062695	0.53031	0.52993	0.999997	1079	0	-0.062695
SNAPC2	15	0.47175	0.75405	0.999997	909	4	0.091395	0.19262	0.45753	0.999997	485	2	0.091395
NonTargeting_Human_0457	1	0.47275	0.47265	0.999997	910	0	-0.064994	0.52725	0.52688	0.999997	1077	0	-0.064994
AGPAT1	15	0.4735	0.7551	0.999997	911	3	0.17255	0.093153	0.28693	0.987471	286	6	0.17255
NonTargeting_Human_0948	1	0.47399	0.47384	0.999997	912	0	-0.06831	0.52601	0.52576	0.999997	1075	0	-0.06831
NonTargeting_Human_0232	1	0.47489	0.47482	0.999997	913	0	-0.055991	0.52511	0.52496	0.999997	1073	0	-0.055991
NonTargeting_Human_0496	1	0.4758	0.47563	0.999997	914	0	-0.056371	0.5242	0.52411	0.999997	1072	0	-0.056371
ITGA1	15	0.47607	0.75643	0.999997	915	3	-0.17149	0.27744	0.56681	0.999997	634	4	-0.17149
RBM3	15	0.47736	0.75719	0.999997	916	4	-0.21371	0.51828	0.77477	0.999997	1061	1	-0.21371
NonTargeting_Human_0594	1	0.47944	0.47922	0.999997	917	0	-0.049624	0.52056	0.52015	0.999997	1068	0	-0.049624
NonTargeting_Human_0344	1	0.47952	0.47932	0.999997	918	0	-0.057572	0.52048	0.52006	0.999997	1067	0	-0.057572
NonTargeting_Human_0122	1	0.48001	0.47987	0.999997	919	0	-0.033508	0.51999	0.51955	0.999997	1066	0	-0.033508
NonTargeting_Human_0548	1	0.48026	0.48005	0.999997	920	0	-0.056441	0.51974	0.51927	0.999997	1065	0	-0.056441
NonTargeting_Human_0395	1	0.48068	0.48033	0.999997	921	0	-0.049581	0.51932	0.51887	0.999997	1064	0	-0.049581
NonTargeting_Human_0401	1	0.48076	0.48042	0.999997	922	0	-0.054132	0.51924	0.51879	0.999997	1063	0	-0.054132
METTL14	15	0.48188	0.75993	0.999997	923	4	-0.11159	0.68553	0.87361	0.999997	1337	3	-0.11159
NonTargeting_Human_0277	1	0.48191	0.48157	0.999997	924	0	-0.042116	0.51809	0.51768	0.999997	1060	0	-0.042116
NonTargeting_Human_0425	1	0.48216	0.48188	0.999997	925	0	-0.046215	0.51784	0.51743	0.999997	1059	0	-0.046215
NonTargeting_Human_0753	1	0.48233	0.48207	0.999997	926	0	-0.049967	0.51767	0.51726	0.999997	1058	0	-0.049967
NonTargeting_Human_0095	1	0.48249	0.48224	0.999997	927	0	-0.04679	0.51751	0.51709	0.999997	1057	0	-0.04679
NonTargeting_Human_0336	1	0.48348	0.48318	0.999997	928	0	-0.048007	0.51652	0.51611	0.999997	1055	0	-0.048007
NonTargeting_Human_0698	1	0.48414	0.48383	0.999997	929	0	-0.04686	0.51586	0.5155	0.999997	1053	0	-0.04686
NonTargeting_Human_0640	1	0.48464	0.48446	0.999997	930	0	-0.046558	0.51536	0.51502	0.999997	1052	0	-0.046558
NonTargeting_Human_0130	1	0.4848	0.48465	0.999997	931	0	-0.046313	0.5152	0.51484	0.999997	1051	0	-0.046313
NonTargeting_Human_0726	1	0.48687	0.48669	0.999997	932	0	-0.039714	0.51313	0.51282	0.999997	1048	0	-0.039714
NonTargeting_Human_0397	1	0.4877	0.48762	0.999997	933	0	-0.037339	0.5123	0.51207	0.999997	1047	0	-0.037339
EGFR	15	0.48779	0.76364	0.999997	934	4	0.22693	0.7588	0.90298	0.999997	1437	3	0.22693
NonTargeting_Human_0971	1	0.48836	0.48819	0.999997	935	0	-0.03517	0.51164	0.51146	0.999997	1045	0	-0.03517
NonTargeting_Human_0046	1	0.48877	0.48865	0.999997	936	0	-0.017615	0.51123	0.511	0.999997	1044	0	-0.017615
NonTargeting_Human_0649	1	0.48951	0.48927	0.999997	937	0	-0.0092012	0.51049	0.51025	0.999997	1043	0	-0.0092012
NonTargeting_Human_0033	1	0.49001	0.4897	0.999997	938	0	-0.032157	0.50999	0.50976	0.999997	1042	0	-0.032157
NonTargeting_Human_0492	1	0.49059	0.49036	0.999997	939	0	-0.02988	0.50941	0.50924	0.999997	1041	0	-0.02988
PDCD10	15	0.49129	0.76567	0.999997	940	4	0.39636	0.15036	0.39129	0.999997	405	4	0.39636
NonTargeting_Human_0121	1	0.49133	0.49114	0.999997	941	0	-0.024551	0.50867	0.50847	0.999997	1039	0	-0.024551
NonTargeting_Human_0118	1	0.49224	0.49198	0.999997	942	0	-0.025175	0.50776	0.50749	0.999997	1038	0	-0.025175
NonTargeting_Human_0378	1	0.49248	0.49225	0.999997	943	0	-0.010081	0.50752	0.50723	0.999997	1037	0	-0.010081
NonTargeting_Human_0085	1	0.49397	0.49374	0.999997	944	0	-0.019876	0.50603	0.50574	0.999997	1035	0	-0.019876
STOML3	15	0.49437	0.76753	0.999997	945	3	0.18209	0.50234	0.765	0.999997	1025	4	0.18209
NonTargeting_Human_0566	1	0.49438	0.49412	0.999997	946	0	-0.01408	0.50562	0.50537	0.999997	1034	0	-0.01408
NonTargeting_Human_0627	1	0.49463	0.49443	0.999997	947	0	-0.014121	0.50537	0.50506	0.999997	1033	0	-0.014121
NonTargeting_Human_0797	1	0.49471	0.49452	0.999997	948	0	-0.0095855	0.50529	0.50499	0.999997	1032	0	-0.0095855
NonTargeting_Human_0087	1	0.49513	0.49492	0.999997	949	0	-0.0061314	0.50487	0.50455	0.999997	1031	0	-0.0061314
NonTargeting_Human_0248	1	0.49529	0.49508	0.999997	950	0	-0.017784	0.50471	0.50435	0.999997	1030	0	-0.017784
NonTargeting_Human_0497	1	0.49554	0.49533	0.999997	951	0	-0.017192	0.50446	0.50415	0.999997	1028	0	-0.017192
NonTargeting_Human_0499	1	0.49719	0.49697	0.999997	952	0	-0.011307	0.50281	0.50266	0.999997	1026	0	-0.011307
NonTargeting_Human_0020	1	0.49818	0.49786	0.999997	953	0	-0.0096984	0.50182	0.50168	0.999997	1024	0	-0.0096984
ARPC5L	15	0.49838	0.76982	0.999997	954	4	0.15742	0.18013	0.43848	0.999997	467	3	0.15742
NonTargeting_Human_0416	1	0.49868	0.49839	0.999997	955	0	-0.0051999	0.50132	0.50117	0.999997	1022	0	-0.0051999
NonTargeting_Human_0741	1	0.49909	0.49886	0.999997	956	0	-0.0059062	0.50091	0.50078	0.999997	1021	0	-0.0059062
WDR7	15	0.4995	0.77043	0.999997	957	3	0.76536	0.00078924	0.0056823	0.299151	32	10	0.76536
NonTargeting_Human_0748	1	0.50033	0.5001	0.999997	958	0	0.00051421	0.49967	0.49952	0.999997	1020	0	0.00051421
NonTargeting_Human_0067	1	0.5005	0.50028	0.999997	959	0	0.00042275	0.4995	0.49935	0.999997	1019	0	0.00042275
NonTargeting_Human_0350	1	0.50058	0.50035	0.999997	960	0	0.00079917	0.49942	0.49925	0.999997	1018	0	0.00079917
NonTargeting_Human_0213	1	0.50066	0.50043	0.999997	961	0	0.00084878	0.49934	0.49917	0.999997	1017	0	0.00084878
NonTargeting_Human_0186	1	0.50157	0.50141	0.999997	962	0	0.0030374	0.49843	0.49812	0.999997	1016	0	0.0030374
NonTargeting_Human_0999	1	0.50256	0.50243	0.999997	963	0	0.0058607	0.49744	0.49725	0.999997	1014	0	0.0058607
HIST1H2BB	13	0.50277	0.75166	0.999997	964	4	-0.080446	0.29596	0.57409	0.999997	670	3	-0.080446
NonTargeting_Human_0844	1	0.50281	0.50266	0.999997	965	0	0.0083532	0.49719	0.49697	0.999997	1013	0	0.0083532
NonTargeting_Human_0069	1	0.50289	0.50274	0.999997	966	0	0.0037685	0.49711	0.4969	0.999997	1012	0	0.0037685
BMI1	15	0.50329	0.77261	0.999997	967	4	0.06427	0.082719	0.26288	0.987471	256	4	0.06427
NonTargeting_Human_0192	1	0.50388	0.50365	0.999997	968	0	0.0055829	0.49612	0.49587	0.999997	1011	0	0.0055829
NonTargeting_Human_0448	1	0.50421	0.50392	0.999997	969	0	0.0071924	0.49579	0.49557	0.999997	1010	0	0.0071924
NonTargeting_Human_0684	1	0.50429	0.50399	0.999997	970	0	0.0064711	0.49571	0.49551	0.999997	1009	0	0.0064711
HYPK	14	0.50565	0.76181	0.999997	971	4	0.41281	0.00011275	0.00097484	0.077633	22	5	0.41281
NonTargeting_Human_0968	1	0.5057	0.50545	0.999997	972	0	0.0088386	0.4943	0.49405	0.999997	1006	0	0.0088386
CDC14A	15	0.50789	0.77518	0.999997	973	4	-0.11218	0.46915	0.74388	0.999997	968	2	-0.11218
ZG16B	15	0.50811	0.77533	0.999997	974	4	0.052698	0.4066	0.6952	0.999997	855	5	0.052698
NonTargeting_Human_0145	1	0.50867	0.50847	0.999997	975	0	0.018585	0.49133	0.49114	0.999997	1005	0	0.018585
NFRKB	15	0.50872	0.77568	0.999997	976	3	0.16115	0.074629	0.24376	0.987471	235	5	0.16115
NonTargeting_Human_0284	1	0.50983	0.50958	0.999997	977	0	0.012595	0.49017	0.48989	0.999997	1004	0	0.012595
NonTargeting_Human_0879	1	0.51024	0.51003	0.999997	978	0	0.021883	0.48976	0.4895	0.999997	1003	0	0.021883
GREB1L	15	0.51118	0.77724	0.999997	979	4	-0.19132	0.46772	0.74299	0.999997	964	3	-0.19132
NonTargeting_Human_0445	1	0.5114	0.51119	0.999997	980	0	0.040123	0.4886	0.48845	0.999997	1002	0	0.040123
NonTargeting_Human_0364	1	0.51156	0.51138	0.999997	981	0	0.027533	0.48844	0.4883	0.999997	1001	0	0.027533
GTF3A	15	0.51163	0.77749	0.999997	982	3	0.48221	0.010614	0.054334	0.875876	77	9	0.48221
NonTargeting_Human_0505	1	0.51264	0.51231	0.999997	983	0	0.031319	0.48736	0.48723	0.999997	999	0	0.031319
NonTargeting_Human_0674	1	0.5128	0.5125	0.999997	984	0	0.016694	0.4872	0.48702	0.999997	998	0	0.016694
NonTargeting_Human_0166	1	0.51297	0.51268	0.999997	985	0	0.030424	0.48703	0.48683	0.999997	997	0	0.030424
NonTargeting_Human_0199	1	0.51313	0.51282	0.999997	986	0	0.031517	0.48687	0.48669	0.999997	996	0	0.031517
EBP	15	0.51329	0.77835	0.999997	987	2	0.00163	0.65403	0.85964	0.999997	1288	4	0.00163
FAM110D	15	0.51451	0.77901	0.999997	988	3	0.1047	0.61396	0.8353	0.999997	1223	2	0.1047
NonTargeting_Human_0111	1	0.51486	0.51444	0.999997	989	0	0.018621	0.48514	0.48504	0.999997	992	0	0.018621
NonTargeting_Human_0706	1	0.51495	0.51456	0.999997	990	0	0.031113	0.48505	0.48495	0.999997	991	0	0.031113
LIMS3	15	0.51561	0.77964	0.999997	991	4	0.091553	0.77965	0.91219	0.999997	1462	3	0.091553
NonTargeting_Human_0083	1	0.51602	0.51565	0.999997	992	0	0.019481	0.48398	0.48369	0.999997	990	0	0.019481
NonTargeting_Human_0717	1	0.51652	0.51611	0.999997	993	0	0.028324	0.48348	0.48318	0.999997	988	0	0.028324
NonTargeting_Human_0101	1	0.518	0.51762	0.999997	994	0	0.027701	0.482	0.48166	0.999997	987	0	0.027701
NonTargeting_Human_0864	1	0.51809	0.51768	0.999997	995	0	0.029257	0.48191	0.48157	0.999997	986	0	0.029257
NonTargeting_Human_0946	1	0.51891	0.51847	0.999997	996	0	0.049643	0.48109	0.48075	0.999997	984	0	0.049643
NonTargeting_Human_0023	1	0.51916	0.51869	0.999997	997	0	0.024066	0.48084	0.48051	0.999997	983	0	0.024066
CACNA1A	15	0.52016	0.78215	0.999997	998	3	0.40201	0.017888	0.081946	0.875876	109	8	0.40201
NonTargeting_Human_0053	1	0.52023	0.5198	0.999997	999	0	0.029256	0.47977	0.4796	0.999997	982	0	0.029256
NonTargeting_Human_0900	1	0.52139	0.52104	0.999997	1000	0	0.029781	0.47861	0.47845	0.999997	981	0	0.029781
NonTargeting_Human_0357	1	0.52221	0.52199	0.999997	1001	0	0.027065	0.47779	0.47762	0.999997	980	0	0.027065
NonTargeting_Human_0450	1	0.52288	0.52263	0.999997	1002	0	0.023706	0.47712	0.47701	0.999997	979	0	0.023706
hsa-mir-1976	12	0.52301	0.76041	0.999997	1003	3	0.16286	0.87584	0.93653	0.999997	1595	2	0.16286
NonTargeting_Human_0063	1	0.52312	0.52289	0.999997	1004	0	0.04153	0.47688	0.47678	0.999997	978	0	0.04153
NonTargeting_Human_0644	1	0.52337	0.52321	0.999997	1005	0	0.035138	0.47663	0.47654	0.999997	977	0	0.035138
NonTargeting_Human_0905	1	0.5237	0.52356	0.999997	1006	0	0.05397	0.4763	0.47612	0.999997	975	0	0.05397
hsa-mir-532	15	0.52441	0.78467	0.999997	1007	4	0.31245	0.076246	0.24765	0.987471	239	5	0.31245
DDX4	15	0.52473	0.78482	0.999997	1008	4	-0.21143	0.28001	0.56945	0.999997	642	3	-0.21143
ZW10	15	0.52508	0.78497	0.999997	1009	4	-0.077224	0.57449	0.81021	0.999997	1162	3	-0.077224
SLC35F5	15	0.52533	0.78509	0.999997	1010	4	0.001952	0.23612	0.5208	0.999997	559	6	0.001952
NonTargeting_Human_0987	1	0.5256	0.52537	0.999997	1011	0	0.080365	0.4744	0.47425	0.999997	973	0	0.080365
NonTargeting_Human_0593	1	0.52618	0.52595	0.999997	1012	0	0.042876	0.47382	0.47365	0.999997	972	0	0.042876
NRBP1	15	0.5271	0.78595	0.999997	1013	4	0.14863	0.80819	0.9253	0.999997	1505	3	0.14863
COMMD10	15	0.52768	0.78628	0.999997	1014	3	0.055902	0.53975	0.78787	0.999997	1098	2	0.055902
NonTargeting_Human_0540	1	0.52849	0.52794	0.999997	1015	0	0.035503	0.47151	0.47136	0.999997	971	0	0.035503
C2CD4A	15	0.52912	0.7871	0.999997	1016	4	0.34896	0.1934	0.45864	0.999997	486	5	0.34896
NonTargeting_Human_0019	1	0.52956	0.52916	0.999997	1017	0	0.035131	0.47044	0.4702	0.999997	970	0	0.035131
WDR13	15	0.52979	0.78757	0.999997	1018	4	0.16103	0.837	0.93901	0.999997	1543	3	0.16103
PKD1	15	0.53053	0.78794	0.999997	1019	3	0.3743	0.019791	0.088586	0.875876	113	8	0.3743
NonTargeting_Human_0320	1	0.53089	0.53043	0.999997	1020	0	0.089504	0.46911	0.46883	0.999997	967	0	0.089504
NonTargeting_Human_0617	1	0.5313	0.53079	0.999997	1021	0	0.040689	0.4687	0.46846	0.999997	965	0	0.040689
NonTargeting_Human_0603	1	0.53246	0.5319	0.999997	1022	0	0.041896	0.46754	0.46729	0.999997	963	0	0.041896
ISG20	15	0.53249	0.78906	0.999997	1023	4	-0.19622	0.63093	0.84598	0.999997	1246	3	-0.19622
ORMDL1	15	0.53256	0.78909	0.999997	1024	3	-0.063513	0.56819	0.8061	0.999997	1155	4	-0.063513
NonTargeting_Human_0452	1	0.53295	0.53232	0.999997	1025	0	0.094607	0.46705	0.46682	0.999997	962	0	0.094607
EML4	15	0.53342	0.78962	0.999997	1026	4	0.27983	0.52575	0.77928	0.999997	1074	4	0.27983
NonTargeting_Human_0798	1	0.53345	0.53278	0.999997	1027	0	0.056611	0.46655	0.46636	0.999997	961	0	0.056611
NonTargeting_Human_0003	1	0.53369	0.53298	0.999997	1028	0	0.075035	0.46631	0.46614	0.999997	960	0	0.075035
NonTargeting_Human_0346	1	0.53452	0.5338	0.999997	1029	0	0.055316	0.46548	0.46546	0.999997	959	0	0.055316
ZNF22	15	0.53579	0.79105	0.999997	1030	2	-0.026273	0.044228	0.16787	0.962702	163	6	-0.026273
NonTargeting_Human_0872	1	0.53601	0.53531	0.999997	1031	0	0.050124	0.46399	0.46407	0.999997	957	0	0.050124
PDHX	15	0.5366	0.79154	0.999997	1032	2	0.090719	0.081475	0.2601	0.987471	253	4	0.090719
NonTargeting_Human_0205	1	0.53791	0.53716	0.999997	1033	0	0.066301	0.46209	0.46199	0.999997	954	0	0.066301
NonTargeting_Human_0967	1	0.53923	0.53846	0.999997	1034	0	0.10157	0.46077	0.46048	0.999997	952	0	0.10157
NonTargeting_Human_0858	1	0.54005	0.53941	0.999997	1035	0	0.068207	0.45995	0.45975	0.999997	949	0	0.068207
NonTargeting_Human_0066	1	0.54055	0.53993	0.999997	1036	0	0.053181	0.45945	0.4592	0.999997	948	0	0.053181
NonTargeting_Human_0815	1	0.54162	0.54098	0.999997	1037	0	0.16517	0.45838	0.45805	0.999997	946	0	0.16517
RUVBL2	13	0.54284	0.78251	0.999997	1038	3	0.28245	0.12925	0.34524	0.999997	352	4	0.28245
BMP15	15	0.54303	0.79516	0.999997	1039	3	-0.098189	0.36015	0.6503	0.999997	778	5	-0.098189
DCAF4	15	0.54347	0.79535	0.999997	1040	4	-0.043767	0.24661	0.53349	0.999997	584	5	-0.043767
NonTargeting_Human_0863	1	0.54352	0.54291	0.999997	1041	0	0.066713	0.45648	0.45636	0.999997	944	0	0.066713
NonTargeting_Human_0179	1	0.54385	0.54321	0.999997	1042	0	0.14271	0.45615	0.45605	0.999997	943	0	0.14271
NonTargeting_Human_0432	1	0.54402	0.54343	0.999997	1043	0	0.052774	0.45598	0.45586	0.999997	942	0	0.052774
NonTargeting_Human_0156	1	0.54435	0.54374	0.999997	1044	0	0.10583	0.45565	0.4556	0.999997	941	0	0.10583
FZD6	15	0.54512	0.79636	0.999997	1045	3	-0.12162	0.72563	0.88948	0.999997	1395	3	-0.12162
NonTargeting_Human_0914	1	0.54592	0.54554	0.999997	1046	0	0.08802	0.45408	0.45384	0.999997	940	0	0.08802
NonTargeting_Human_0621	1	0.54604	0.54573	0.999997	1047	0	0.17429	0.45396	0.45366	0.999997	939	0	0.17429
NonTargeting_Human_0928	1	0.54616	0.54585	0.999997	1048	0	0.19793	0.45384	0.45355	0.999997	938	0	0.19793
NonTargeting_Human_0943	1	0.54649	0.54616	0.999997	1049	0	0.10057	0.45351	0.45322	0.999997	937	0	0.10057
NonTargeting_Human_0996	1	0.54691	0.5465	0.999997	1050	0	0.18494	0.45309	0.45288	0.999997	936	0	0.18494
NonTargeting_Human_0089	1	0.5479	0.54742	0.999997	1051	0	0.054347	0.4521	0.45192	0.999997	933	0	0.054347
NonTargeting_Human_0463	1	0.55046	0.55004	0.999997	1052	0	0.080262	0.44954	0.44936	0.999997	931	0	0.080262
NonTargeting_Human_0291	1	0.55095	0.5505	0.999997	1053	0	0.081655	0.44905	0.44888	0.999997	930	0	0.081655
ZNF232	15	0.55139	0.8003	0.999997	1054	3	0.40569	0.014206	0.068276	0.875876	95	7	0.40569
NonTargeting_Human_0768	1	0.55153	0.55108	0.999997	1055	0	0.094999	0.44847	0.44831	0.999997	929	0	0.094999
NonTargeting_Human_0304	1	0.55161	0.55118	0.999997	1056	0	0.087187	0.44839	0.44823	0.999997	928	0	0.087187
NonTargeting_Human_0714	1	0.55393	0.55354	0.999997	1057	0	0.29581	0.44607	0.44593	0.999997	927	0	0.29581
NonTargeting_Human_0756	1	0.55409	0.55371	0.999997	1058	0	0.063678	0.44591	0.44579	0.999997	926	0	0.063678
NonTargeting_Human_0752	1	0.55417	0.55382	0.999997	1059	0	0.089656	0.44583	0.44568	0.999997	925	0	0.089656
NonTargeting_Human_0608	1	0.55426	0.55393	0.999997	1060	0	0.11422	0.44574	0.4456	0.999997	924	0	0.11422
NonTargeting_Human_0678	1	0.55624	0.55609	0.999997	1061	0	0.098047	0.44376	0.44359	0.999997	922	0	0.098047
NonTargeting_Human_0759	1	0.55748	0.55736	0.999997	1062	0	0.075415	0.44252	0.44233	0.999997	920	0	0.075415
BID	15	0.55762	0.80405	0.999997	1063	3	-0.036998	0.92437	0.96688	0.999997	1654	2	-0.036998
NonTargeting_Human_0610	1	0.55781	0.55763	0.999997	1064	0	0.10398	0.44219	0.44194	0.999997	917	0	0.10398
NonTargeting_Human_0324	1	0.55814	0.55798	0.999997	1065	0	0.12675	0.44186	0.44158	0.999997	916	0	0.12675
NonTargeting_Human_0182	1	0.55863	0.55852	0.999997	1066	0	0.13546	0.44137	0.44109	0.999997	914	0	0.13546
NonTargeting_Human_0868	1	0.55888	0.55877	0.999997	1067	0	0.11289	0.44112	0.44082	0.999997	913	0	0.11289
NonTargeting_Human_0247	1	0.55963	0.55951	0.999997	1068	0	0.091271	0.44037	0.44004	0.999997	912	0	0.091271
NonTargeting_Human_0403	1	0.55971	0.55958	0.999997	1069	0	0.13179	0.44029	0.43997	0.999997	911	0	0.13179
NonTargeting_Human_0827	1	0.55987	0.55973	0.999997	1070	0	0.17169	0.44013	0.43982	0.999997	910	0	0.17169
NonTargeting_Human_0221	1	0.56037	0.56022	0.999997	1071	0	0.19002	0.43963	0.43936	0.999997	909	0	0.19002
NonTargeting_Human_0553	1	0.56202	0.56203	0.999997	1072	0	0.10765	0.43798	0.4378	0.999997	908	0	0.10765
C6orf62	15	0.56205	0.80671	0.999997	1073	2	0.14299	0.022457	0.097984	0.902105	122	6	0.14299
NonTargeting_Human_0689	1	0.56367	0.56373	0.999997	1074	0	0.16396	0.43633	0.43612	0.999997	906	0	0.16396
NonTargeting_Human_0394	1	0.56483	0.56499	0.999997	1075	0	0.081112	0.43517	0.43503	0.999997	905	0	0.081112
NonTargeting_Human_0124	1	0.56549	0.56562	0.999997	1076	0	0.10984	0.43451	0.4343	0.999997	904	0	0.10984
TMEM134	15	0.56626	0.80925	0.999997	1077	3	0.048176	0.14434	0.38144	0.999997	379	5	0.048176
NonTargeting_Human_0822	1	0.56631	0.56647	0.999997	1078	0	0.17056	0.43369	0.43349	0.999997	902	0	0.17056
NonTargeting_Human_0415	1	0.56673	0.5669	0.999997	1079	0	0.10867	0.43327	0.43306	0.999997	901	0	0.10867
RPS8	14	0.56679	0.80299	0.999997	1080	4	0.029719	0.053436	0.18791	0.97864	186	5	0.029719
NonTargeting_Human_0626	1	0.56681	0.56698	0.999997	1081	0	0.11512	0.43319	0.43298	0.999997	900	0	0.11512
NonTargeting_Human_0765	1	0.56706	0.56717	0.999997	1082	0	0.10189	0.43294	0.4327	0.999997	899	0	0.10189
NonTargeting_Human_0950	1	0.56714	0.56727	0.999997	1083	0	0.11771	0.43286	0.43261	0.999997	898	0	0.11771
NonTargeting_Human_0152	1	0.56962	0.56985	0.999997	1084	0	0.092716	0.43038	0.43024	0.999997	896	0	0.092716
NR2C2AP	15	0.56994	0.81139	0.999997	1085	4	0.27084	0.01673	0.077606	0.875876	104	6	0.27084
GPN3	15	0.57023	0.81156	0.999997	1086	4	0.18	0.20494	0.47597	0.999997	510	3	0.18
NonTargeting_Human_0227	1	0.57036	0.57054	0.999997	1087	0	0.17567	0.42964	0.42939	0.999997	895	0	0.17567
WARS	15	0.57138	0.81214	0.999997	1088	4	0.045993	0.53795	0.78676	0.999997	1096	3	0.045993
NonTargeting_Human_0845	1	0.5716	0.57174	0.999997	1089	0	0.16402	0.4284	0.42818	0.999997	893	0	0.16402
MSI2	15	0.57196	0.8125	0.999997	1090	4	0.19152	0.52931	0.78133	0.999997	1078	3	0.19152
NonTargeting_Human_0202	1	0.57259	0.57278	0.999997	1091	0	0.11098	0.42741	0.42729	0.999997	892	0	0.11098
NonTargeting_Human_0963	1	0.57284	0.57304	0.999997	1092	0	0.21113	0.42716	0.42703	0.999997	891	0	0.21113
NonTargeting_Human_0852	1	0.57519	0.57538	0.999997	1093	0	0.74654	0.42481	0.4248	0.999997	889	0	0.74654
NonTargeting_Human_0884	1	0.57655	0.57676	0.999997	1094	0	0.17498	0.42345	0.42344	0.999997	887	0	0.17498
NonTargeting_Human_0777	1	0.57755	0.57784	0.999997	1095	0	0.21643	0.42245	0.42253	0.999997	886	0	0.21643
NonTargeting_Human_0637	1	0.57788	0.57817	0.999997	1096	0	0.10477	0.42212	0.42219	0.999997	885	0	0.10477
NonTargeting_Human_0491	1	0.57821	0.57857	0.999997	1097	0	0.16107	0.42179	0.42186	0.999997	883	0	0.16107
NonTargeting_Human_0893	1	0.57911	0.57956	0.999997	1098	0	0.18536	0.42089	0.42104	0.999997	882	0	0.18536
EWSR1	15	0.58032	0.81757	0.999997	1099	4	0.020996	0.16636	0.4164	0.999997	441	5	0.020996
NonTargeting_Human_0417	1	0.58044	0.58097	0.999997	1100	0	0.15578	0.41956	0.41981	0.999997	881	0	0.15578
SAFB	15	0.58058	0.81774	0.999997	1101	1	0.15173	0.53849	0.78711	0.999997	1097	4	0.15173
NonTargeting_Human_0602	1	0.58101	0.58152	0.999997	1102	0	0.11288	0.41899	0.41921	0.999997	879	0	0.11288
NonTargeting_Human_0919	1	0.58118	0.58169	0.999997	1103	0	0.16121	0.41882	0.41897	0.999997	878	0	0.16121
NonTargeting_Human_0830	1	0.58151	0.58199	0.999997	1104	0	0.15253	0.41849	0.41873	0.999997	877	0	0.15253
NonTargeting_Human_0422	1	0.58159	0.58206	0.999997	1105	0	0.13734	0.41841	0.41861	0.999997	876	0	0.13734
LACRT	15	0.58278	0.81903	0.999997	1106	3	0.42477	0.27101	0.5598	0.999997	623	5	0.42477
NonTargeting_Human_0446	1	0.58316	0.58368	0.999997	1107	0	0.098127	0.41684	0.41695	0.999997	873	0	0.098127
SMOC1	15	0.58362	0.8195	0.999997	1108	4	0.0071133	0.20923	0.48207	0.999997	515	4	0.0071133
NonTargeting_Human_0991	1	0.5839	0.58436	0.999997	1109	0	0.11043	0.4161	0.41618	0.999997	871	0	0.11043
NonTargeting_Human_0371	1	0.58415	0.58457	0.999997	1110	0	0.14727	0.41585	0.41592	0.999997	870	0	0.14727
NonTargeting_Human_0207	1	0.58506	0.58547	0.999997	1111	0	0.19163	0.41494	0.41503	0.999997	867	0	0.19163
NonTargeting_Human_0651	1	0.58605	0.58651	0.999997	1112	0	0.10848	0.41395	0.41408	0.999997	866	0	0.10848
RALB	15	0.58662	0.82112	0.999997	1113	4	0.41188	0.056461	0.19929	0.97951	196	7	0.41188
NonTargeting_Human_0978	1	0.58671	0.5872	0.999997	1114	0	0.26066	0.41329	0.41343	0.999997	865	0	0.26066
CCDC101	15	0.58714	0.82141	0.999997	1115	1	0.064313	0.26173	0.54991	0.999997	606	4	0.064313
TMEM30B	15	0.58719	0.82144	0.999997	1116	4	0.0067358	0.21832	0.49513	0.999997	527	4	0.0067358
NonTargeting_Human_0183	1	0.58886	0.58929	0.999997	1117	0	0.12948	0.41114	0.41132	0.999997	863	0	0.12948
NonTargeting_Human_0840	1	0.58911	0.58958	0.999997	1118	0	0.11176	0.41089	0.41112	0.999997	862	0	0.11176
MTFP1	15	0.59032	0.82327	0.999997	1119	4	0.18608	0.21525	0.49076	0.999997	523	5	0.18608
NonTargeting_Human_0803	1	0.59051	0.591	0.999997	1120	0	0.16566	0.40949	0.40969	0.999997	860	0	0.16566
ZNF646	15	0.5906	0.82347	0.999997	1121	4	-0.094893	0.44149	0.7266	0.999997	915	4	-0.094893
C10orf53	15	0.59127	0.82384	0.999997	1122	3	-0.13205	0.65009	0.8574	0.999997	1279	4	-0.13205
SMNDC1	15	0.59145	0.82399	0.999997	1123	4	0.83793	0.0015541	0.010441	0.469028	38	10	0.83793
NonTargeting_Human_0257	1	0.592	0.59241	0.999997	1124	0	0.30771	0.408	0.40812	0.999997	859	0	0.30771
NonTargeting_Human_0758	1	0.59282	0.59331	0.999997	1125	0	0.17733	0.40718	0.40725	0.999997	857	0	0.17733
NonTargeting_Human_0851	1	0.59456	0.59494	0.999997	1126	0	0.32113	0.40544	0.40543	0.999997	853	0	0.32113
hsa-mir-1229	15	0.59521	0.82639	0.999997	1127	2	0.064741	0.40376	0.6924	0.999997	848	4	0.064741
NonTargeting_Human_0308	1	0.5953	0.59566	0.999997	1128	0	0.19152	0.4047	0.40455	0.999997	851	0	0.19152
NonTargeting_Human_0907	1	0.59596	0.59633	0.999997	1129	0	0.20899	0.40404	0.40386	0.999997	849	0	0.20899
NonTargeting_Human_0728	1	0.59629	0.59667	0.999997	1130	0	0.1718	0.40371	0.40364	0.999997	847	0	0.1718
NonTargeting_Human_0804	1	0.59761	0.59804	0.999997	1131	0	0.2173	0.40239	0.40246	0.999997	846	0	0.2173
NonTargeting_Human_0054	1	0.59786	0.59828	0.999997	1132	0	0.15222	0.40214	0.40226	0.999997	844	0	0.15222
WRNIP1	15	0.59796	0.82813	0.999997	1133	4	-0.19128	0.7605	0.9037	0.999997	1439	2	-0.19128
OR52B2	15	0.59841	0.82837	0.999997	1134	3	0.33385	0.41286	0.70101	0.999997	864	4	0.33385
NonTargeting_Human_0402	1	0.59935	0.59982	0.999997	1135	0	0.20331	0.40065	0.4007	0.999997	842	0	0.20331
EIF5A	15	0.59945	0.82902	0.999997	1136	3	-0.25862	0.29975	0.58984	0.999997	682	5	-0.25862
NonTargeting_Human_0960	1	0.59968	0.60023	0.999997	1137	0	0.23595	0.40032	0.40039	0.999997	841	0	0.23595
NonTargeting_Human_0276	1	0.60042	0.60102	0.999997	1138	0	0.16053	0.39958	0.39964	0.999997	840	0	0.16053
NonTargeting_Human_0534	1	0.60092	0.60161	0.999997	1139	0	0.13668	0.39908	0.39922	0.999997	839	0	0.13668
NonTargeting_Human_0097	1	0.60125	0.60192	0.999997	1140	0	0.17457	0.39875	0.39896	0.999997	838	0	0.17457
PGA3	15	0.60155	0.83019	0.999997	1141	2	0.42224	0.16449	0.41353	0.999997	437	6	0.42224
NonTargeting_Human_0630	1	0.60199	0.60267	0.999997	1142	0	0.15043	0.39801	0.39825	0.999997	837	0	0.15043
NonTargeting_Human_0465	1	0.60249	0.60322	0.999997	1143	0	0.18104	0.39751	0.39777	0.999997	836	0	0.18104
NonTargeting_Human_0174	1	0.60422	0.60496	0.999997	1144	0	0.154	0.39578	0.396	0.999997	833	0	0.154
NonTargeting_Human_0584	1	0.60447	0.60533	0.999997	1145	0	0.36597	0.39553	0.39577	0.999997	832	0	0.36597
DHDDS	14	0.60492	0.82831	0.999997	1146	4	0.18639	0.30669	0.58751	0.999997	694	5	0.18639
NonTargeting_Human_0325	1	0.60546	0.60625	0.999997	1147	0	0.18601	0.39454	0.39484	0.999997	830	0	0.18601
NonTargeting_Human_0490	1	0.6067	0.60738	0.999997	1148	0	0.17732	0.3933	0.39366	0.999997	828	0	0.17732
NonTargeting_Human_0142	1	0.60843	0.60918	0.999997	1149	0	0.1891	0.39157	0.39192	0.999997	826	0	0.1891
NonTargeting_Human_0541	1	0.60926	0.61	0.999997	1150	0	0.21429	0.39074	0.39107	0.999997	825	0	0.21429
NonTargeting_Human_0354	1	0.60975	0.61053	0.999997	1151	0	0.1889	0.39025	0.39056	0.999997	824	0	0.1889
PIGS	15	0.61055	0.83579	0.999997	1152	4	-0.015078	0.34392	0.63443	0.999997	753	4	-0.015078
NonTargeting_Human_0875	1	0.61074	0.61139	0.999997	1153	0	0.19631	0.38926	0.38966	0.999997	823	0	0.19631
NonTargeting_Human_0816	1	0.61132	0.61197	0.999997	1154	0	0.17042	0.38868	0.38912	0.999997	822	0	0.17042
NonTargeting_Human_0614	1	0.61405	0.61474	0.999997	1155	0	0.19689	0.38595	0.38624	0.999997	820	0	0.19689
NonTargeting_Human_0523	1	0.61454	0.61531	0.999997	1156	0	0.28235	0.38546	0.38575	0.999997	819	0	0.28235
NonTargeting_Human_0525	1	0.61479	0.61552	0.999997	1157	0	0.17119	0.38521	0.38553	0.999997	817	0	0.17119
NonTargeting_Human_0296	1	0.61661	0.61746	0.999997	1158	0	0.18187	0.38339	0.38373	0.999997	812	0	0.18187
NonTargeting_Human_0788	1	0.6176	0.61833	0.999997	1159	0	0.2187	0.3824	0.38281	0.999997	810	0	0.2187
NonTargeting_Human_1000	1	0.61785	0.61863	0.999997	1160	0	0.19122	0.38215	0.38248	0.999997	809	0	0.19122
NOMO1	15	0.61857	0.84046	0.999997	1161	4	-0.13735	0.39542	0.68401	0.999997	831	4	-0.13735
NonTargeting_Human_0189	1	0.62057	0.6212	0.999997	1162	0	0.2156	0.37943	0.37955	0.999997	807	0	0.2156
NonTargeting_Human_0854	1	0.62115	0.62185	0.999997	1163	0	0.29463	0.37885	0.37896	0.999997	806	0	0.29463
INTS12	15	0.62356	0.84343	0.999997	1164	4	0.46426	0.01304	0.064161	0.875876	89	8	0.46426
NonTargeting_Human_0775	1	0.62371	0.62449	0.999997	1165	0	0.19972	0.37629	0.37638	0.999997	803	0	0.19972
NAA10	15	0.6244	0.84399	0.999997	1166	3	0.35137	0.16315	0.41156	0.999997	433	6	0.35137
NonTargeting_Human_0694	1	0.62495	0.62581	0.999997	1167	0	0.23201	0.37505	0.37512	0.999997	802	0	0.23201
RPL28	15	0.62502	0.84435	0.999997	1168	3	0.72175	0.0034744	0.021387	0.679781	50	9	0.72175
SLX4	15	0.62552	0.84462	0.999997	1169	2	0.36302	0.0022267	0.014837	0.530511	45	7	0.36302
NonTargeting_Human_0599	1	0.6261	0.62704	0.999997	1170	0	0.19833	0.3739	0.37392	0.999997	799	0	0.19833
NonTargeting_Human_0326	1	0.62635	0.6273	0.999997	1171	0	0.19821	0.37365	0.37367	0.999997	798	0	0.19821
SYP	15	0.62656	0.84525	0.999997	1172	4	0.03327	0.63103	0.84605	0.999997	1247	3	0.03327
NonTargeting_Human_0595	1	0.62784	0.62886	0.999997	1173	0	0.18475	0.37216	0.37213	0.999997	796	0	0.18475
PGM1	15	0.62897	0.8465	0.999997	1174	2	0.26002	0.047718	0.1771	0.97864	171	7	0.26002
ELF4	15	0.63044	0.84741	0.999997	1175	3	0.14964	0.3414	0.63193	0.999997	750	4	0.14964
CMAS	15	0.63044	0.84741	0.999997	1176	3	-0.12438	0.3565	0.64672	0.999997	773	5	-0.12438
IRS2	15	0.63106	0.84785	0.999997	1177	2	0.20037	0.33353	0.62402	0.999997	740	5	0.20037
LAS1L	15	0.63133	0.84802	0.999997	1178	4	0.25716	0.18245	0.44193	0.999997	470	6	0.25716
NonTargeting_Human_0021	1	0.63172	0.63291	0.999997	1179	0	0.18288	0.36828	0.36829	0.999997	795	0	0.18288
NonTargeting_Human_0537	1	0.63197	0.63317	0.999997	1180	0	0.26986	0.36803	0.36806	0.999997	794	0	0.26986
MBOAT7	15	0.63222	0.8486	0.999997	1181	3	0.15716	0.41573	0.70378	0.999997	869	5	0.15716
NonTargeting_Human_0104	1	0.63271	0.63404	0.999997	1182	0	0.20616	0.36729	0.36726	0.999997	793	0	0.20616
NonTargeting_Human_0923	1	0.63279	0.6341	0.999997	1183	0	0.21683	0.36721	0.36715	0.999997	792	0	0.21683
NonTargeting_Human_0267	1	0.63312	0.63443	0.999997	1184	0	0.17394	0.36688	0.36677	0.999997	790	0	0.17394
PAGE4	15	0.63328	0.84911	0.999997	1185	4	0.059428	0.81181	0.92703	0.999997	1512	3	0.059428
ZBTB44	15	0.63382	0.84935	0.999997	1186	4	-0.14043	0.45078	0.73253	0.999997	932	3	-0.14043
NonTargeting_Human_0774	1	0.63387	0.6351	0.999997	1187	0	0.29537	0.36613	0.36602	0.999997	789	0	0.29537
NonTargeting_Human_0629	1	0.63469	0.63586	0.999997	1188	0	0.23021	0.36531	0.36518	0.999997	787	0	0.23021
MAOB	15	0.63523	0.8501	0.999997	1189	4	0.081498	0.58949	0.81946	0.999997	1181	2	0.081498
NonTargeting_Human_0434	1	0.63684	0.63806	0.999997	1190	0	0.44532	0.36316	0.36304	0.999997	784	0	0.44532
NonTargeting_Human_0165	1	0.63725	0.63851	0.999997	1191	0	0.21084	0.36275	0.36256	0.999997	783	0	0.21084
NonTargeting_Human_0203	1	0.63841	0.6396	0.999997	1192	0	0.15312	0.36159	0.36141	0.999997	781	0	0.15312
NonTargeting_Human_0309	1	0.63907	0.64031	0.999997	1193	0	0.22292	0.36093	0.36083	0.999997	780	0	0.22292
TAF8	15	0.63959	0.85252	0.999997	1194	3	-0.20484	0.81037	0.92625	0.999997	1510	2	-0.20484
NonTargeting_Human_0517	1	0.63965	0.64099	0.999997	1195	0	0.28805	0.36035	0.36026	0.999997	779	0	0.28805
C12orf43	15	0.64074	0.85311	0.999997	1196	3	0.16645	0.41687	0.70485	0.999997	874	5	0.16645
NonTargeting_Human_0917	1	0.64105	0.64237	0.999997	1197	0	0.20152	0.35895	0.35891	0.999997	777	0	0.20152
GALR1	15	0.64153	0.85356	0.999997	1198	3	0.19691	0.13568	0.36668	0.999997	366	5	0.19691
TMEM183A	15	0.64187	0.85375	0.999997	1199	4	0.15357	0.18815	0.45085	0.999997	479	5	0.15357
NonTargeting_Human_0653	1	0.64312	0.6444	0.999997	1200	0	0.3223	0.35688	0.35693	0.999997	774	0	0.3223
CPM	15	0.64432	0.85509	0.999997	1201	3	0.24071	0.64824	0.85622	0.999997	1276	4	0.24071
NonTargeting_Human_0467	1	0.64444	0.64582	0.999997	1202	0	0.32022	0.35556	0.35569	0.999997	771	0	0.32022
NonTargeting_Human_0351	1	0.64518	0.64661	0.999997	1203	0	0.32095	0.35482	0.35494	0.999997	770	0	0.32095
NonTargeting_Human_0328	1	0.64634	0.64784	0.999997	1204	0	0.2833	0.35366	0.35382	0.999997	767	0	0.2833
NonTargeting_Human_0624	1	0.64675	0.64824	0.999997	1205	0	0.37356	0.35325	0.35338	0.999997	766	0	0.37356
NonTargeting_Human_0559	1	0.64865	0.65021	0.999997	1206	0	0.29702	0.35135	0.35147	0.999997	764	0	0.29702
NonTargeting_Human_0251	1	0.64906	0.65065	0.999997	1207	0	0.22841	0.35094	0.35106	0.999997	762	0	0.22841
ADAMTSL1	15	0.64906	0.85782	0.999997	1208	2	0.34575	0.072873	0.23955	0.987471	229	6	0.34575
UVRAG	15	0.64977	0.85822	0.999997	1209	3	0.45052	0.017144	0.079103	0.875876	106	7	0.45052
NonTargeting_Human_0037	1	0.64989	0.65136	0.999997	1210	0	0.24838	0.35011	0.35019	0.999997	761	0	0.24838
SPRN	15	0.65046	0.85865	0.999997	1211	2	0.039926	0.20218	0.47193	0.999997	503	5	0.039926
NonTargeting_Human_0903	1	0.65121	0.65269	0.999997	1212	0	0.31549	0.34879	0.34885	0.999997	759	0	0.31549
NonTargeting_Human_0512	1	0.65195	0.65335	0.999997	1213	0	0.29755	0.34805	0.34817	0.999997	756	0	0.29755
NonTargeting_Human_0115	1	0.65352	0.65486	0.999997	1214	0	0.279	0.34648	0.34661	0.999997	755	0	0.279
PGM3	15	0.65482	0.86102	0.999997	1215	4	0.32006	0.44422	0.72836	0.999997	923	4	0.32006
BRICD5	15	0.65645	0.86193	0.999997	1216	2	0.30676	0.097574	0.29693	0.987471	293	7	0.30676
NonTargeting_Human_0750	1	0.65674	0.6582	0.999997	1217	0	0.50335	0.34326	0.34364	0.999997	751	0	0.50335
HNRNPA2B1	15	0.65782	0.86277	0.999997	1218	2	0.1066	0.078711	0.25333	0.987471	244	3	0.1066
TM9SF2	15	0.65893	0.86354	0.999997	1219	3	0.27886	0.071567	0.23623	0.987471	226	6	0.27886
NonTargeting_Human_0311	1	0.6593	0.66046	0.999997	1220	0	0.33775	0.3407	0.34076	0.999997	749	0	0.33775
NonTargeting_Human_0699	1	0.66046	0.66147	0.999997	1221	0	0.36887	0.33954	0.33945	0.999997	748	0	0.36887
NonTargeting_Human_0428	1	0.6612	0.66211	0.999997	1222	0	0.34963	0.3388	0.33881	0.999997	747	0	0.34963
NonTargeting_Human_0691	1	0.66145	0.66246	0.999997	1223	0	0.28848	0.33855	0.33852	0.999997	746	0	0.28848
NonTargeting_Human_0707	1	0.66162	0.66264	0.999997	1224	0	0.28436	0.33838	0.33831	0.999997	745	0	0.28436
NonTargeting_Human_0611	1	0.66285	0.66393	0.999997	1225	0	0.27551	0.33715	0.33702	0.999997	743	0	0.27551
SERPINB5	15	0.66417	0.86677	0.999997	1226	4	0.06677	0.87851	0.95222	0.999997	1599	2	0.06677
NonTargeting_Human_0360	1	0.66451	0.6655	0.999997	1227	0	0.27274	0.33549	0.33519	0.999997	742	0	0.27274
FAM219B	15	0.66458	0.86701	0.999997	1228	3	-0.12837	0.63625	0.84913	0.999997	1256	4	-0.12837
TPP2	15	0.6652	0.86737	0.999997	1229	4	-0.41165	0.69885	0.87876	0.999997	1355	3	-0.41165
NonTargeting_Human_0740	1	0.66533	0.66633	0.999997	1230	0	0.61091	0.33467	0.33434	0.999997	741	0	0.61091
NonTargeting_Human_0379	1	0.66731	0.66843	0.999997	1231	0	0.30795	0.33269	0.3322	0.999997	739	0	0.30795
NonTargeting_Human_0303	1	0.66748	0.66857	0.999997	1232	0	0.24382	0.33252	0.33201	0.999997	738	0	0.24382
NonTargeting_Human_0322	1	0.66806	0.66922	0.999997	1233	0	0.44645	0.33194	0.33145	0.999997	737	0	0.44645
MED26	15	0.66858	0.86939	0.999997	1234	3	0.18871	0.10507	0.31373	0.991892	311	6	0.18871
NonTargeting_Human_0017	1	0.66863	0.66972	0.999997	1235	0	0.24709	0.33137	0.3309	0.999997	736	0	0.24709
NonTargeting_Human_0669	1	0.66913	0.67025	0.999997	1236	0	0.35916	0.33087	0.33041	0.999997	735	0	0.35916
BATF	15	0.67135	0.87098	0.999997	1237	4	0.063057	0.36696	0.65668	0.999997	791	4	0.063057
NonTargeting_Human_0420	1	0.67136	0.67228	0.999997	1238	0	0.32815	0.32864	0.32818	0.999997	731	0	0.32815
NonTargeting_Human_0908	1	0.67186	0.67276	0.999997	1239	0	0.42899	0.32814	0.32774	0.999997	730	0	0.42899
NonTargeting_Human_0734	1	0.67227	0.67315	0.999997	1240	0	0.36453	0.32773	0.32733	0.999997	728	0	0.36453
NonTargeting_Human_0869	1	0.6726	0.67343	0.999997	1241	0	0.34855	0.3274	0.32701	0.999997	727	0	0.34855
NonTargeting_Human_0876	1	0.67475	0.67538	0.999997	1242	0	0.69454	0.32525	0.32482	0.998393	725	0	0.69454
NonTargeting_Human_0220	1	0.67532	0.67602	0.999997	1243	0	0.3486	0.32468	0.32423	0.998393	724	0	0.3486
NonTargeting_Human_0790	1	0.67541	0.6761	0.999997	1244	0	0.99564	0.32459	0.32412	0.998393	723	0	0.99564
NonTargeting_Human_0271	1	0.6759	0.67645	0.999997	1245	0	0.39188	0.3241	0.32371	0.998393	722	0	0.39188
NonTargeting_Human_0112	1	0.67623	0.67678	0.999997	1246	0	0.49276	0.32377	0.32338	0.998393	721	0	0.49276
NonTargeting_Human_0898	1	0.67764	0.6782	0.999997	1247	0	0.51359	0.32236	0.32194	0.998393	719	0	0.51359
NonTargeting_Human_0383	1	0.67854	0.67914	0.999997	1248	0	0.32357	0.32146	0.32105	0.998393	716	0	0.32357
NonTargeting_Human_0819	1	0.68028	0.68095	0.999997	1249	0	0.27942	0.31972	0.31929	0.998393	715	0	0.27942
NonTargeting_Human_0744	1	0.6811	0.68173	0.999997	1250	0	0.24296	0.3189	0.31841	0.997937	714	0	0.24296
NonTargeting_Human_0645	1	0.68201	0.68267	0.999997	1251	0	0.26687	0.31799	0.31732	0.996318	712	0	0.26687
NonTargeting_Human_0234	1	0.68218	0.68284	0.999997	1252	0	0.32709	0.31782	0.31715	0.996318	711	0	0.32709
WDHD1	15	0.68421	0.87839	0.999997	1253	4	0.57551	0.001965	0.013165	0.498247	41	7	0.57551
PPM1A	15	0.68428	0.87844	0.999997	1254	2	0.29709	0.10247	0.30802	0.987471	305	7	0.29709
NonTargeting_Human_0776	1	0.68433	0.68506	0.999997	1255	0	0.27765	0.31567	0.31511	0.992939	708	0	0.27765
TSPYL4	15	0.68499	0.87885	0.999997	1256	3	0.06837	0.21097	0.48444	0.999997	517	6	0.06837
NonTargeting_Human_0676	1	0.68581	0.68654	0.999997	1257	0	0.66059	0.31419	0.31366	0.991892	706	0	0.66059
COG2	15	0.68583	0.87939	0.999997	1258	1	0.17512	0.45867	0.7375	0.999997	947	4	0.17512
FAM156A	15	0.68819	0.88087	0.999997	1259	4	-0.028285	0.6824	0.87231	0.999997	1335	2	-0.028285
NonTargeting_Human_0228	1	0.68837	0.68888	0.999997	1260	0	0.26528	0.31163	0.31109	0.987471	704	0	0.26528
NonTargeting_Human_0718	1	0.68879	0.68932	0.999997	1261	0	0.34231	0.31121	0.31069	0.987471	703	0	0.34231
NonTargeting_Human_0475	1	0.68895	0.68952	0.999997	1262	0	0.4532	0.31105	0.31053	0.987471	702	0	0.4532
TNFAIP3	15	0.68942	0.88162	0.999997	1263	4	0.1002	0.099662	0.30163	0.987471	296	4	0.1002
NonTargeting_Human_0583	1	0.69027	0.691	0.999997	1264	0	0.84499	0.30973	0.30914	0.987471	701	0	0.84499
NonTargeting_Human_0201	1	0.69168	0.6923	0.999997	1265	0	0.2625	0.30832	0.30779	0.987471	699	0	0.2625
NonTargeting_Human_0426	1	0.69201	0.6927	0.999997	1266	0	0.38045	0.30799	0.30748	0.987471	698	0	0.38045
NonTargeting_Human_0625	1	0.693	0.69356	0.999997	1267	0	0.52507	0.307	0.30658	0.987471	696	0	0.52507
NonTargeting_Human_0639	1	0.69457	0.69494	0.999997	1268	0	0.32034	0.30543	0.30514	0.987471	693	0	0.32034
NonTargeting_Human_0451	1	0.6949	0.69526	0.999997	1269	0	0.35948	0.3051	0.30483	0.987471	692	0	0.35948
ORMDL3	15	0.69621	0.88425	0.999997	1270	3	0.21717	0.17286	0.42695	0.999997	455	6	0.21717
NonTargeting_Human_0959	1	0.69622	0.6966	0.999997	1271	0	0.33357	0.30378	0.30351	0.987471	691	0	0.33357
hsa-mir-6511a-4	15	0.69658	0.88436	0.999997	1272	3	-0.022694	0.20954	0.4825	0.999997	516	4	-0.022694
NonTargeting_Human_0143	1	0.6968	0.6972	0.999997	1273	0	0.75375	0.3032	0.30299	0.987471	690	0	0.75375
NonTargeting_Human_0993	1	0.69737	0.69778	0.999997	1274	0	0.4043	0.30263	0.30247	0.987471	689	0	0.4043
PIK3C3	15	0.6978	0.88476	0.999997	1275	2	0.56538	0.0092409	0.048242	0.875876	74	8	0.56538
GP1BB	15	0.69806	0.88486	0.999997	1276	3	-0.013958	0.96238	0.98148	0.999997	1698	1	-0.013958
NonTargeting_Human_0697	1	0.69812	0.69853	0.999997	1277	0	0.29295	0.30188	0.3018	0.987471	686	0	0.29295
NonTargeting_Human_0042	1	0.6982	0.69862	0.999997	1278	0	0.3607	0.3018	0.30174	0.987471	685	0	0.3607
NonTargeting_Human_0746	1	0.69845	0.69886	0.999997	1279	0	0.42878	0.30155	0.30151	0.987471	684	0	0.42878
NonTargeting_Human_0995	1	0.70043	0.7009	0.999997	1280	0	0.42686	0.29957	0.29943	0.987471	681	0	0.42686
VPS72	15	0.70143	0.88601	0.999997	1281	3	0.11155	0.34808	0.63831	0.999997	757	4	0.11155
NonTargeting_Human_0157	1	0.70167	0.70211	0.999997	1282	0	0.39365	0.29833	0.29833	0.987471	680	0	0.39365
NonTargeting_Human_0084	1	0.70216	0.70263	0.999997	1283	0	0.36601	0.29784	0.29781	0.987471	678	0	0.36601
NonTargeting_Human_0048	1	0.70241	0.70286	0.999997	1284	0	0.44986	0.29759	0.29756	0.987471	677	0	0.44986
NonTargeting_Human_0554	1	0.70249	0.70292	0.999997	1285	0	0.55859	0.29751	0.29748	0.987471	676	0	0.55859
NonTargeting_Human_0140	1	0.70315	0.70351	0.999997	1286	0	0.27716	0.29685	0.29681	0.987471	674	0	0.27716
NonTargeting_Human_0305	1	0.70382	0.70422	0.999997	1287	0	0.65276	0.29618	0.29615	0.987471	672	0	0.65276
NonTargeting_Human_0440	1	0.70654	0.70674	0.999997	1288	0	0.50756	0.29346	0.29311	0.987471	669	0	0.50756
NonTargeting_Human_0256	1	0.70894	0.70903	0.999997	1289	0	0.31163	0.29106	0.29071	0.987471	667	0	0.31163
NonTargeting_Human_0387	1	0.70935	0.70953	0.999997	1290	0	0.52898	0.29065	0.29027	0.987471	666	0	0.52898
NonTargeting_Human_0460	1	0.70951	0.70968	0.999997	1291	0	0.52958	0.29049	0.29019	0.987471	665	0	0.52958
NonTargeting_Human_0677	1	0.70984	0.71	0.999997	1292	0	0.36209	0.29016	0.28981	0.987471	664	0	0.36209
NonTargeting_Human_0060	1	0.71059	0.71069	0.999997	1293	0	0.32185	0.28941	0.28914	0.987471	663	0	0.32185
NonTargeting_Human_0711	1	0.71108	0.71124	0.999997	1294	0	0.43253	0.28892	0.28864	0.987471	662	0	0.43253
NonTargeting_Human_0981	1	0.71141	0.71159	0.999997	1295	0	0.70207	0.28859	0.28834	0.987471	659	0	0.70207
NDNL2	15	0.71246	0.88971	0.999997	1296	2	0.075731	0.015876	0.074475	0.875876	99	7	0.075731
NonTargeting_Human_0088	1	0.71273	0.71298	0.999997	1297	0	0.38882	0.28727	0.28684	0.987471	657	0	0.38882
NonTargeting_Human_0184	1	0.71298	0.71324	0.999997	1298	0	0.53814	0.28702	0.28662	0.987471	656	0	0.53814
DAZ1	15	0.71323	0.88998	0.999997	1299	1	0.11472	0.1704	0.42291	0.999997	449	5	0.11472
NonTargeting_Human_0658	1	0.71339	0.71369	0.999997	1300	0	0.57705	0.28661	0.28626	0.987471	654	0	0.57705
NonTargeting_Human_0469	1	0.71397	0.71421	0.999997	1301	0	0.31818	0.28603	0.28565	0.987471	653	1	0.31818
DYNLL1	15	0.714	0.89028	0.999997	1302	2	0.59868	0.0067962	0.03699	0.875876	62	8	0.59868
NonTargeting_Human_0850	1	0.71447	0.71469	0.999997	1303	0	0.34534	0.28553	0.28516	0.987471	652	1	0.34534
NonTargeting_Human_0043	1	0.71455	0.71478	0.999997	1304	0	0.25918	0.28545	0.28506	0.987471	651	1	0.25918
NonTargeting_Human_0074	1	0.71463	0.71488	0.999997	1305	0	0.42615	0.28537	0.28497	0.987471	650	1	0.42615
OTC	14	0.71465	0.8804	0.999997	1306	3	-0.13214	0.19696	0.45898	0.999997	493	5	-0.13214
EXOC4	15	0.71486	0.89063	0.999997	1307	3	0.3848	0.0092504	0.048276	0.875876	75	4	0.3848
NonTargeting_Human_0662	1	0.71513	0.71539	0.999997	1308	0	0.40558	0.28487	0.28441	0.987471	649	1	0.40558
AGAP4	15	0.71535	0.89081	0.999997	1309	3	0.31595	0.14593	0.38405	0.999997	386	5	0.31595
NonTargeting_Human_0942	1	0.71579	0.7161	0.999997	1310	0	0.3263	0.28421	0.28381	0.987471	648	1	0.3263
NonTargeting_Human_0177	1	0.71587	0.71616	0.999997	1311	0	0.43997	0.28413	0.28371	0.987471	647	1	0.43997
SLC7A6OS	14	0.71678	0.88143	0.999997	1312	3	0.11269	0.077201	0.24808	0.987471	242	6	0.11269
NonTargeting_Human_0300	1	0.71686	0.71721	0.999997	1313	0	0.40809	0.28314	0.28267	0.987471	645	1	0.40809
NonTargeting_Human_0487	1	0.7205	0.7207	0.999997	1314	0	0.39574	0.2795	0.27924	0.987471	641	1	0.39574
NonTargeting_Human_0231	1	0.72124	0.72149	0.999997	1315	0	0.2834	0.27876	0.27856	0.987471	637	1	0.2834
PRPF38B	13	0.72132	0.87798	0.999997	1316	1	0.62166	0.035698	0.1367	0.955463	148	7	0.62166
NonTargeting_Human_0229	1	0.72149	0.72174	0.999997	1317	0	0.29003	0.27851	0.27836	0.987471	636	1	0.29003
NonTargeting_Human_0358	1	0.72182	0.72213	0.999997	1318	0	0.31543	0.27818	0.27796	0.987471	635	1	0.31543
NonTargeting_Human_0338	1	0.72289	0.72331	0.999997	1319	0	0.50466	0.27711	0.27701	0.987471	633	1	0.50466
NonTargeting_Human_0619	1	0.72297	0.72345	0.999997	1320	0	0.47761	0.27703	0.27691	0.987471	632	1	0.47761
EMC6	15	0.7246	0.89425	0.999997	1321	2	0.13122	0.31413	0.60464	0.999997	705	5	0.13122
NonTargeting_Human_0897	1	0.72471	0.72521	0.999997	1322	0	0.40796	0.27529	0.27522	0.987471	631	1	0.40796
NonTargeting_Human_0483	1	0.72553	0.72601	0.999997	1323	0	0.80513	0.27447	0.27431	0.987471	630	1	0.80513
NonTargeting_Human_0148	1	0.7262	0.72668	0.999997	1324	0	0.3779	0.2738	0.27356	0.987471	628	1	0.3779
NonTargeting_Human_0116	1	0.72661	0.72706	0.999997	1325	0	0.38166	0.27339	0.27321	0.987471	627	1	0.38166
NonTargeting_Human_0389	1	0.72702	0.72748	0.999997	1326	0	0.58129	0.27298	0.27285	0.987471	626	1	0.58129
NonTargeting_Human_0856	1	0.7271	0.72755	0.999997	1327	0	0.65266	0.2729	0.27277	0.987471	625	1	0.65266
NonTargeting_Human_0650	1	0.7276	0.72803	0.999997	1328	0	0.29974	0.2724	0.27235	0.987471	624	1	0.29974
NonTargeting_Human_0238	1	0.72925	0.72964	0.999997	1329	0	0.56755	0.27075	0.27069	0.987471	622	1	0.56755
CEBPZ	13	0.73003	0.88278	0.999997	1330	3	0.2432	0.0081485	0.040743	0.875876	67	6	0.2432
TMEM18	15	0.7323	0.89709	0.999997	1331	3	-0.1664	0.97545	0.98454	0.999997	1707	1	-0.1664
NonTargeting_Human_0035	1	0.7333	0.73357	0.999997	1332	0	0.37713	0.2667	0.26672	0.987471	616	1	0.37713
NonTargeting_Human_0695	1	0.73338	0.73365	0.999997	1333	0	0.47031	0.26662	0.26666	0.987471	615	1	0.47031
NonTargeting_Human_0409	1	0.73355	0.73377	0.999997	1334	0	0.3168	0.26645	0.2665	0.987471	614	1	0.3168
NonTargeting_Human_0607	1	0.73371	0.73396	0.999997	1335	0	0.69083	0.26629	0.26636	0.987471	613	1	0.69083
SIRT5	15	0.7342	0.89786	0.999997	1336	3	0.011563	0.22017	0.49775	0.999997	532	6	0.011563
NonTargeting_Human_0086	1	0.73462	0.73489	0.999997	1337	0	0.29541	0.26538	0.26546	0.987471	612	1	0.29541
FBXL8	15	0.7359	0.89851	0.999997	1338	3	0.1064	0.26359	0.55184	0.999997	611	5	0.1064
DEXI	15	0.73626	0.89868	0.999997	1339	1	0.2213	0.63813	0.85022	0.999997	1261	4	0.2213
NonTargeting_Human_0433	1	0.73693	0.7373	0.999997	1340	0	0.51127	0.26307	0.26304	0.987471	610	1	0.51127
NonTargeting_Human_0992	1	0.73701	0.73738	0.999997	1341	0	0.85541	0.26299	0.26297	0.987471	609	1	0.85541
CCL14	15	0.73721	0.89902	0.999997	1342	3	-0.25939	0.38291	0.67203	0.999997	811	2	-0.25939
NonTargeting_Human_0690	1	0.73817	0.73859	0.999997	1343	0	0.67901	0.26183	0.26162	0.987471	607	1	0.67901
NonTargeting_Human_0682	1	0.73974	0.74014	0.999997	1344	0	0.56211	0.26026	0.26013	0.987471	604	1	0.56211
MLLT1	15	0.73981	0.9	0.999997	1345	1	0.10768	0.026383	0.11211	0.93067	131	6	0.10768
NonTargeting_Human_0873	1	0.74032	0.74065	0.999997	1346	0	0.36726	0.25968	0.2596	0.987471	603	1	0.36726
NonTargeting_Human_0125	1	0.74065	0.74107	0.999997	1347	0	0.37828	0.25935	0.2593	0.987471	602	1	0.37828
NonTargeting_Human_0780	1	0.7409	0.74134	0.999997	1348	0	0.9589	0.2591	0.25912	0.987471	601	1	0.9589
NonTargeting_Human_0366	1	0.74114	0.74158	0.999997	1349	0	0.44733	0.25886	0.25887	0.987471	600	1	0.44733
NonTargeting_Human_0733	1	0.7418	0.74224	0.999997	1350	0	0.57065	0.2582	0.25824	0.987471	599	1	0.57065
NonTargeting_Human_0569	1	0.74205	0.74249	0.999997	1351	0	0.87662	0.25795	0.25796	0.987471	598	1	0.87662
RHOT2	15	0.74208	0.90087	0.999997	1352	2	-0.19831	0.67516	0.86966	0.999997	1320	3	-0.19831
RDH14	15	0.74296	0.90124	0.999997	1353	2	0.40464	0.01626	0.075995	0.875876	101	8	0.40464
RNMT	15	0.74329	0.90135	0.999997	1354	3	0.1412	0.57485	0.81042	0.999997	1164	4	0.1412
NonTargeting_Human_0493	1	0.74329	0.74375	0.999997	1355	0	0.88966	0.25671	0.25655	0.987471	596	1	0.88966
ISG15	15	0.74366	0.90145	0.999997	1356	2	0.045555	0.39359	0.68236	0.999997	829	3	0.045555
NonTargeting_Human_0947	1	0.74395	0.74433	0.999997	1357	0	0.67894	0.25605	0.25589	0.987471	595	1	0.67894
CLDND2	15	0.744	0.90154	0.999997	1358	3	0.2196	0.11062	0.32455	0.998393	320	5	0.2196
NonTargeting_Human_0332	1	0.74412	0.74449	0.999997	1359	0	0.46454	0.25588	0.25572	0.987471	594	1	0.46454
CORO1A	15	0.74529	0.90198	0.999997	1360	3	-0.081852	0.17307	0.42726	0.999997	458	5	-0.081852
NonTargeting_Human_0825	1	0.74635	0.74679	0.999997	1361	0	0.62339	0.25365	0.2535	0.987471	592	1	0.62339
NonTargeting_Human_0190	1	0.74692	0.74738	0.999997	1362	0	0.43153	0.25308	0.25292	0.987471	591	1	0.43153
NonTargeting_Human_0272	1	0.74709	0.74758	0.999997	1363	0	0.62538	0.25291	0.25278	0.987471	590	1	0.62538
NonTargeting_Human_0380	1	0.7499	0.75014	0.999997	1364	0	1.1051	0.2501	0.24997	0.987471	588	1	1.1051
NonTargeting_Human_0002	1	0.75081	0.75101	0.999997	1365	0	0.59118	0.24919	0.24908	0.987471	587	1	0.59118
NonTargeting_Human_0751	1	0.75089	0.75112	0.999997	1366	0	0.60423	0.24911	0.24897	0.987471	585	1	0.60423
ANKRD35	15	0.75241	0.90447	0.999997	1367	2	0.22835	0.15973	0.40613	0.999997	428	6	0.22835
NonTargeting_Human_0681	1	0.75411	0.75446	0.999997	1368	0	0.77572	0.24589	0.24584	0.987471	582	1	0.77572
CNTN6	15	0.75492	0.90545	0.999997	1369	3	0.11446	0.11068	0.32469	0.998393	321	3	0.11446
NonTargeting_Human_0330	1	0.75502	0.75539	0.999997	1370	0	0.44245	0.24498	0.24505	0.987471	581	1	0.44245
NonTargeting_Human_0476	1	0.75593	0.7563	0.999997	1371	0	0.56175	0.24407	0.24409	0.987471	579	1	0.56175
NonTargeting_Human_0113	1	0.75667	0.75709	0.999997	1372	0	0.49536	0.24333	0.24329	0.987471	576	1	0.49536
NonTargeting_Human_0666	1	0.75741	0.75789	0.999997	1373	0	0.58008	0.24259	0.24249	0.987471	575	1	0.58008
NonTargeting_Human_0449	1	0.75782	0.75824	0.999997	1374	0	0.4492	0.24218	0.24211	0.987471	574	1	0.4492
NonTargeting_Human_0258	1	0.75873	0.75914	0.999997	1375	0	0.52215	0.24127	0.24125	0.987471	572	1	0.52215
NonTargeting_Human_0778	1	0.75898	0.75944	0.999997	1376	0	0.47293	0.24102	0.24095	0.987471	570	1	0.47293
NonTargeting_Human_0204	1	0.75915	0.75956	0.999997	1377	0	0.46573	0.24085	0.24079	0.987471	569	1	0.46573
NonTargeting_Human_0161	1	0.75964	0.76006	0.999997	1378	0	0.44235	0.24036	0.2403	0.987471	565	1	0.44235
NonTargeting_Human_0953	1	0.7608	0.76116	0.999997	1379	0	0.62106	0.2392	0.23911	0.987471	564	1	0.62106
NonTargeting_Human_0146	1	0.76138	0.76168	0.999997	1380	0	0.42263	0.23862	0.23849	0.987471	563	1	0.42263
NonTargeting_Human_0290	1	0.76187	0.76218	0.999997	1381	0	0.49181	0.23813	0.23805	0.987471	561	1	0.49181
NonTargeting_Human_0800	1	0.76204	0.76236	0.999997	1382	0	0.6561	0.23796	0.23793	0.987471	560	1	0.6561
CTNNBIP1	15	0.76342	0.90882	0.999997	1383	2	0.30386	0.028863	0.12065	0.952123	136	6	0.30386
FAM104A	15	0.76441	0.90924	0.999997	1384	3	0.075786	0.062476	0.21438	0.987471	211	7	0.075786
NonTargeting_Human_0133	1	0.76493	0.76521	0.999997	1385	0	0.55611	0.23507	0.23504	0.987471	556	1	0.55611
KRTAP4-2	15	0.76542	0.90963	0.999997	1386	2	0.15599	0.13478	0.36517	0.999997	363	5	0.15599
NonTargeting_Human_0585	1	0.76749	0.76802	0.999997	1387	0	0.44988	0.23251	0.23256	0.987471	555	1	0.44988
NonTargeting_Human_0224	1	0.76757	0.76809	0.999997	1388	0	0.89209	0.23243	0.23242	0.987471	554	1	0.89209
NonTargeting_Human_0340	1	0.76782	0.76836	0.999997	1389	0	0.58932	0.23218	0.23213	0.987471	553	1	0.58932
NonTargeting_Human_0411	1	0.76815	0.76874	0.999997	1390	0	0.67119	0.23185	0.23181	0.987471	552	1	0.67119
NonTargeting_Human_0870	1	0.76823	0.76877	0.999997	1391	0	0.61243	0.23177	0.23174	0.987471	551	1	0.61243
NonTargeting_Human_0072	1	0.77153	0.77196	0.999997	1392	0	0.66295	0.22847	0.22853	0.987471	548	1	0.66295
NonTargeting_Human_0195	1	0.77352	0.77401	0.999997	1393	0	0.51009	0.22648	0.22633	0.987471	546	1	0.51009
ANKHD1-EIF4EBP3	15	0.77428	0.91309	0.999997	1394	2	-0.010547	0.66858	0.86728	0.999997	1310	3	-0.010547
NonTargeting_Human_0771	1	0.77442	0.77491	0.999997	1395	0	1.0619	0.22558	0.22541	0.987471	545	1	1.0619
NonTargeting_Human_0769	1	0.77467	0.77517	0.999997	1396	0	0.46807	0.22533	0.22515	0.987471	544	1	0.46807
S100A10	15	0.77537	0.91354	0.999997	1397	3	-0.18688	0.51388	0.77216	0.999997	1049	4	-0.18688
NonTargeting_Human_0250	1	0.77641	0.77703	0.999997	1398	0	0.57273	0.22359	0.2232	0.987471	541	1	0.57273
SLC35B2	15	0.77666	0.91407	0.999997	1399	3	0.14524	0.24062	0.52717	0.999997	568	4	0.14524
MAP1S	15	0.77692	0.91421	0.999997	1400	1	0.69627	0.0039805	0.023817	0.70725	54	8	0.69627
NonTargeting_Human_0242	1	0.77756	0.77825	0.999997	1401	0	0.51906	0.22244	0.22214	0.987471	540	1	0.51906
NonTargeting_Human_0070	1	0.77764	0.77832	0.999997	1402	0	0.58767	0.22236	0.22205	0.987471	539	1	0.58767
NonTargeting_Human_0294	1	0.77773	0.77839	0.999997	1403	0	0.85741	0.22227	0.22198	0.987471	538	1	0.85741
NonTargeting_Human_0902	1	0.77822	0.7789	0.999997	1404	0	0.45862	0.22178	0.22153	0.987471	537	1	0.45862
NonTargeting_Human_0680	1	0.77971	0.7803	0.999997	1405	0	0.6727	0.22029	0.22001	0.987471	534	1	0.6727
NonTargeting_Human_0119	1	0.77979	0.7804	0.999997	1406	0	0.44554	0.22021	0.21996	0.987471	533	1	0.44554
NonTargeting_Human_0298	1	0.78012	0.78077	0.999997	1407	0	0.63412	0.21988	0.21959	0.987471	531	1	0.63412
NonTargeting_Human_0702	1	0.7802	0.7809	0.999997	1408	0	0.50239	0.2198	0.21952	0.987471	530	1	0.50239
NonTargeting_Human_0500	1	0.78054	0.78115	0.999997	1409	0	0.57066	0.21946	0.21933	0.987471	529	1	0.57066
IBA57	15	0.78099	0.91597	0.999997	1410	3	-0.1258	0.39619	0.68479	0.999997	834	4	-0.1258
NonTargeting_Human_0218	1	0.78161	0.7823	0.999997	1411	0	0.44346	0.21839	0.21827	0.987471	528	1	0.44346
NonTargeting_Human_0826	1	0.7826	0.78331	0.999997	1412	0	0.63653	0.2174	0.21722	0.987471	526	1	0.63653
EGLN2	15	0.78266	0.91669	0.999997	1413	1	0.76366	2.7524e-05	0.00029104	0.029994	17	11	0.76366
NonTargeting_Human_0348	1	0.78301	0.78368	0.999997	1414	0	0.56035	0.21699	0.21679	0.987471	525	1	0.56035
MCM3	14	0.7834	0.91168	0.999997	1415	2	0.50787	0.19531	0.45703	0.999997	489	5	0.50787
NonTargeting_Human_0038	1	0.78409	0.78478	0.999997	1416	0	0.46387	0.21591	0.21562	0.987471	524	1	0.46387
NonTargeting_Human_0513	1	0.78491	0.78557	0.999997	1417	0	0.58333	0.21509	0.21478	0.987471	522	1	0.58333
SNX19	15	0.78492	0.91758	0.999997	1418	3	0.34713	0.15555	0.39977	0.999997	414	5	0.34713
NonTargeting_Human_0848	1	0.78499	0.78565	0.999997	1419	0	0.55709	0.21501	0.21472	0.987471	521	1	0.55709
NonTargeting_Human_0568	1	0.78747	0.78817	0.999997	1420	0	0.53109	0.21253	0.21218	0.987471	520	1	0.53109
NonTargeting_Human_0932	1	0.78888	0.78949	0.999997	1421	0	1.2205	0.21112	0.21082	0.987471	519	1	1.2205
NonTargeting_Human_0732	1	0.78896	0.78954	0.999997	1422	0	0.95	0.21104	0.21075	0.987471	518	1	0.95
IRS4	15	0.79053	0.91981	0.999997	1423	2	0.33492	0.048694	0.17954	0.97864	173	7	0.33492
CAPN15	15	0.79057	0.91983	0.999997	1424	1	0.22808	0.36549	0.65533	0.999997	788	5	0.22808
MRPS16	15	0.79122	0.92006	0.999997	1425	2	0.4187	0.086288	0.27128	0.987471	266	7	0.4187
NonTargeting_Human_0385	1	0.79177	0.79225	0.999997	1426	0	0.72892	0.20823	0.208	0.984921	514	1	0.72892
ZFP3	15	0.79371	0.92109	0.999997	1427	2	-0.065163	0.55337	0.7965	0.999997	1123	3	-0.065163
NonTargeting_Human_0572	1	0.79375	0.79418	0.999997	1428	0	0.6125	0.20625	0.20609	0.98118	513	1	0.6125
NonTargeting_Human_0365	1	0.79466	0.79517	0.999997	1429	0	0.58313	0.20534	0.20518	0.97951	512	1	0.58313
NonTargeting_Human_0031	1	0.7949	0.79543	0.999997	1430	0	0.72015	0.2051	0.20502	0.97951	511	1	0.72015
NonTargeting_Human_0029	1	0.79507	0.79563	0.999997	1431	0	0.87703	0.20493	0.20489	0.97951	509	1	0.87703
NID1	15	0.79519	0.92169	0.999997	1432	3	-0.10177	0.24914	0.5363	0.999997	586	4	-0.10177
NonTargeting_Human_0793	1	0.79565	0.79628	0.999997	1433	0	0.5812	0.20435	0.20427	0.97951	508	1	0.5812
NonTargeting_Human_0314	1	0.7959	0.79651	0.999997	1434	0	0.84312	0.2041	0.20396	0.97951	507	1	0.84312
NonTargeting_Human_0966	1	0.79606	0.79666	0.999997	1435	0	0.76906	0.20394	0.20376	0.97951	506	1	0.76906
NonTargeting_Human_0241	1	0.79705	0.79763	0.999997	1436	0	0.68585	0.20295	0.20281	0.97951	505	1	0.68585
NonTargeting_Human_0913	1	0.79713	0.79772	0.999997	1437	0	0.79827	0.20287	0.20268	0.97951	504	1	0.79827
OR56A1	15	0.79793	0.92282	0.999997	1438	1	0.4324	0.022024	0.096385	0.902105	120	7	0.4324
NonTargeting_Human_0134	1	0.79821	0.79878	0.999997	1439	0	0.44784	0.20179	0.20156	0.97951	502	1	0.44784
NonTargeting_Human_0837	1	0.79912	0.79962	0.999997	1440	0	0.68787	0.20088	0.20062	0.97951	501	1	0.68787
VPS51	15	0.80125	0.92439	0.999997	1441	1	0.68418	0.0051901	0.029627	0.798553	58	9	0.68418
NonTargeting_Human_0687	1	0.80168	0.80221	0.999997	1442	0	0.44462	0.19832	0.19806	0.97951	496	1	0.44462
NonTargeting_Human_0843	1	0.80184	0.80238	0.999997	1443	0	0.59373	0.19816	0.1979	0.97951	495	1	0.59373
BRD2	15	0.80207	0.92475	0.999997	1444	1	0.097263	0.035711	0.14356	0.955463	149	7	0.097263
NonTargeting_Human_0721	1	0.8025	0.80309	0.999997	1445	0	1.06	0.1975	0.19718	0.97951	494	1	1.06
NonTargeting_Human_0508	1	0.80374	0.8042	0.999997	1446	0	0.85135	0.19626	0.19601	0.97951	491	1	0.85135
GPR152	14	0.8044	0.92176	0.999997	1447	3	0.062889	0.10597	0.30366	0.987471	314	2	0.062889
NonTargeting_Human_0418	1	0.8063	0.80667	0.999997	1448	0	0.80357	0.1937	0.19356	0.97951	487	1	0.80357
ZNF548	15	0.80664	0.92677	0.999997	1449	3	-0.23191	0.35388	0.64406	0.999997	769	2	-0.23191
CLEC3B	15	0.80777	0.92726	0.999997	1450	3	0.084321	0.15508	0.39895	0.999997	413	6	0.084321
KCNU1	15	0.80838	0.92749	0.999997	1451	3	0.31511	0.19941	0.46778	0.999997	498	5	0.31511
NonTargeting_Human_0895	1	0.80861	0.80878	0.999997	1452	0	1.0291	0.19139	0.1912	0.97951	483	1	1.0291
LRRC8A	15	0.80926	0.92781	0.999997	1453	2	0.18398	0.36211	0.65219	0.999997	782	5	0.18398
NonTargeting_Human_0015	1	0.80985	0.80996	0.999997	1454	0	0.46678	0.19015	0.18992	0.97864	482	1	0.46678
NonTargeting_Human_0679	1	0.81027	0.81026	0.999997	1455	0	0.60384	0.18973	0.18959	0.97864	481	1	0.60384
SRGAP2	15	0.81029	0.92823	0.999997	1456	3	0.13169	0.20039	0.46925	0.999997	500	4	0.13169
NonTargeting_Human_0363	1	0.81051	0.81056	0.999997	1457	0	0.70525	0.18949	0.18934	0.97864	480	1	0.70525
FRG2C	14	0.81171	0.92558	0.999997	1458	3	0.098508	0.18025	0.4356	0.999997	468	4	0.098508
SCARB1	15	0.81194	0.92899	0.999997	1459	2	0.16485	0.32234	0.61276	0.999997	718	5	0.16485
NCAPG2	15	0.81238	0.9292	0.999997	1460	3	0.50559	0.05052	0.18404	0.97864	177	7	0.50559
NonTargeting_Human_0495	1	0.81249	0.81249	0.999997	1461	0	0.66932	0.18751	0.18747	0.97864	478	1	0.66932
NonTargeting_Human_0196	1	0.81258	0.81257	0.999997	1462	0	0.52518	0.18742	0.18734	0.97864	477	1	0.52518
NonTargeting_Human_0755	1	0.81316	0.8131	0.999997	1463	0	0.94964	0.18684	0.18671	0.97864	476	1	0.94964
NonTargeting_Human_0938	1	0.81382	0.81377	0.999997	1464	0	0.64091	0.18618	0.18599	0.97864	475	1	0.64091
NonTargeting_Human_0386	1	0.81448	0.81437	0.999997	1465	0	1.1967	0.18552	0.18526	0.97864	474	1	1.1967
HAPLN1	15	0.81483	0.93033	0.999997	1466	3	0.27639	0.076527	0.2483	0.987471	241	7	0.27639
NonTargeting_Human_0833	1	0.8153	0.81512	0.999997	1467	0	0.65472	0.1847	0.18448	0.97864	473	1	0.65472
NonTargeting_Human_0468	1	0.81588	0.81572	0.999997	1468	0	0.53747	0.18412	0.18396	0.97864	472	1	0.53747
SPDYE1	15	0.81595	0.93084	0.999997	1469	2	0.15188	0.046645	0.17429	0.975595	169	5	0.15188
NonTargeting_Human_0911	1	0.81679	0.81666	0.999997	1470	0	0.7597	0.18321	0.18319	0.97864	471	1	0.7597
NonTargeting_Human_0361	1	0.81844	0.8183	0.999997	1471	0	0.64915	0.18156	0.1815	0.97864	469	1	0.64915
FZR1	15	0.81855	0.93202	0.999997	1472	3	0.54235	0.032219	0.13222	0.955463	141	8	0.54235
ALDH3A2	15	0.82021	0.93274	0.999997	1473	3	0.087936	0.11807	0.33739	0.999997	336	5	0.087936
NonTargeting_Human_0956	1	0.82042	0.82015	0.999997	1474	0	0.64103	0.17958	0.17963	0.97864	466	1	0.64103
NonTargeting_Human_0373	1	0.82067	0.82039	0.999997	1475	0	0.48956	0.17933	0.17944	0.97864	465	1	0.48956
ASB16	15	0.82286	0.93376	0.999997	1476	2	0.1611	0.52327	0.77785	0.999997	1070	2	0.1611
SLAMF6	15	0.82294	0.93378	0.999997	1477	3	0.094501	0.56088	0.80136	0.999997	1137	3	0.094501
CTIF	15	0.82312	0.93382	0.999997	1478	3	0.068458	0.2215	0.49955	0.999997	536	6	0.068458
NonTargeting_Human_0219	1	0.82315	0.82294	0.999997	1479	0	0.62811	0.17685	0.17721	0.97864	463	1	0.62811
NonTargeting_Human_0355	1	0.82348	0.82321	0.999997	1480	0	0.64593	0.17652	0.17685	0.97864	462	1	0.64593
hsa-mir-1908	15	0.8242	0.93426	0.999997	1481	3	-0.12407	0.40997	0.69836	0.999997	861	2	-0.12407
NonTargeting_Human_0438	1	0.82686	0.82657	0.999997	1482	0	0.6602	0.17314	0.17358	0.974692	459	1	0.6602
NonTargeting_Human_0519	1	0.82711	0.82681	0.999997	1483	0	0.58517	0.17289	0.17329	0.974692	456	1	0.58517
NonTargeting_Human_0168	1	0.8286	0.82839	0.999997	1484	0	0.80973	0.1714	0.17178	0.970824	452	1	0.80973
NonTargeting_Human_0005	1	0.82893	0.82865	0.999997	1485	0	0.56035	0.17107	0.17142	0.970824	450	1	0.56035
PGAP3	15	0.8299	0.93665	0.999997	1486	3	-0.015084	0.5234	0.77795	0.999997	1071	4	-0.015084
NonTargeting_Human_0071	1	0.83058	0.83035	0.999997	1487	0	0.73422	0.16942	0.16992	0.966552	448	1	0.73422
TCP10	15	0.83095	0.93714	0.999997	1488	3	0.28474	0.080306	0.25712	0.987471	250	6	0.28474
FAM21A	15	0.83148	0.93747	0.999997	1489	3	-0.015407	0.86677	0.94899	0.999997	1580	2	-0.015407
NonTargeting_Human_0041	1	0.8319	0.83165	0.999997	1490	0	0.57166	0.1681	0.16859	0.962702	446	1	0.57166
NonTargeting_Human_0288	1	0.83223	0.83197	0.999997	1491	0	0.59848	0.16777	0.16819	0.962702	444	1	0.59848
NonTargeting_Human_0693	1	0.83322	0.8329	0.999997	1492	0	0.77765	0.16678	0.16723	0.962702	442	1	0.77765
NonTargeting_Human_0704	1	0.83413	0.83382	0.999997	1493	0	0.60937	0.16587	0.16642	0.962702	439	1	0.60937
TRIM8	15	0.83452	0.93877	0.999997	1494	1	0.3167	0.062522	0.21451	0.987471	212	6	0.3167
NonTargeting_Human_0293	1	0.83479	0.83456	0.999997	1495	0	0.80044	0.16521	0.16569	0.962702	438	1	0.80044
NonTargeting_Human_0246	1	0.83554	0.83526	0.999997	1496	0	0.87918	0.16446	0.165	0.962702	436	1	0.87918
NonTargeting_Human_0171	1	0.83603	0.83581	0.999997	1497	0	0.61778	0.16397	0.16447	0.962702	435	1	0.61778
NonTargeting_Human_0436	1	0.83727	0.83715	0.999997	1498	0	0.94356	0.16273	0.16336	0.962702	432	1	0.94356
NonTargeting_Human_0834	1	0.83892	0.8388	0.999997	1499	0	0.8912	0.16108	0.16172	0.962702	430	1	0.8912
NonTargeting_Human_0867	1	0.83933	0.83923	0.999997	1500	0	0.84961	0.16067	0.16126	0.962702	429	1	0.84961
NonTargeting_Human_0889	1	0.84057	0.84056	0.999997	1501	0	0.86177	0.15943	0.16002	0.960108	427	1	0.86177
NonTargeting_Human_0671	1	0.84082	0.84084	0.999997	1502	0	1.1927	0.15918	0.15976	0.960108	426	1	1.1927
NonTargeting_Human_0127	1	0.84099	0.84104	0.999997	1503	0	0.74874	0.15901	0.15959	0.960108	424	1	0.74874
NonTargeting_Human_0806	1	0.84173	0.84175	0.999997	1504	0	0.80544	0.15827	0.15892	0.960108	421	1	0.80544
NonTargeting_Human_0217	1	0.84206	0.84213	0.999997	1505	0	0.80307	0.15794	0.15851	0.960108	420	1	0.80307
hsa-mir-7973-1	4	0.84232	0.84296	0.999997	1506	0	0.16453	0.027622	0.069372	0.875876	133	1	0.16453
NonTargeting_Human_0817	1	0.84256	0.84264	0.999997	1507	0	0.89059	0.15744	0.15793	0.960108	417	1	0.89059
KRTAP13-2	15	0.84265	0.94232	0.999997	1508	2	0.06085	0.51388	0.77216	0.999997	1050	3	0.06085
NonTargeting_Human_0855	1	0.84289	0.84297	0.999997	1509	0	0.72478	0.15711	0.15763	0.960108	416	1	0.72478
ABCB4	15	0.84331	0.94257	0.999997	1510	3	-0.040906	0.17454	0.42951	0.999997	460	4	-0.040906
NonTargeting_Human_0333	1	0.84338	0.8435	0.999997	1511	0	0.72764	0.15662	0.15714	0.960108	415	1	0.72764
EEFSEC	15	0.84484	0.9433	0.999997	1512	2	0.89179	2.5726e-05	0.00027409	0.029994	16	11	0.89179
NonTargeting_Human_0274	1	0.84602	0.84605	0.999997	1513	0	0.77435	0.15398	0.15468	0.957615	412	1	0.77435
PRR3	15	0.84625	0.94388	0.999997	1514	3	0.14904	0.40754	0.69597	0.999997	858	4	0.14904
NonTargeting_Human_0922	1	0.84635	0.84639	0.999997	1515	0	1.1642	0.15365	0.15434	0.957615	411	1	1.1642
NonTargeting_Human_0091	1	0.84668	0.84677	0.999997	1516	0	0.65932	0.15332	0.15399	0.957615	410	1	0.65932
NonTargeting_Human_0447	1	0.84726	0.84736	0.999997	1517	0	0.91514	0.15274	0.1535	0.957615	409	1	0.91514
NonTargeting_Human_0550	1	0.84768	0.84774	0.999997	1518	0	0.64728	0.15232	0.15303	0.957615	408	1	0.64728
NonTargeting_Human_0700	1	0.84784	0.84789	0.999997	1519	0	0.73961	0.15216	0.1529	0.957615	407	1	0.73961
NonTargeting_Human_0882	1	0.84933	0.84927	0.999997	1520	0	1.4121	0.15067	0.15154	0.957615	406	1	1.4121
PIP5K1A	15	0.84956	0.94527	0.999997	1521	2	0.77583	0.00082982	0.0059762	0.299151	34	10	0.77583
NonTargeting_Human_0153	1	0.85032	0.85023	0.999997	1522	0	0.59043	0.14968	0.15052	0.955463	404	1	0.59043
NonTargeting_Human_0586	1	0.8504	0.85027	0.999997	1523	0	0.63511	0.1496	0.15041	0.955463	403	1	0.63511
NonTargeting_Human_0032	1	0.85048	0.85035	0.999997	1524	0	0.69527	0.14952	0.15031	0.955463	402	1	0.69527
NonTargeting_Human_0114	1	0.85065	0.85048	0.999997	1525	0	1.6182	0.14935	0.15018	0.955463	401	1	1.6182
NonTargeting_Human_0212	1	0.8509	0.85077	0.999997	1526	0	1.2424	0.1491	0.14992	0.955463	399	1	1.2424
NonTargeting_Human_0484	1	0.85098	0.85084	0.999997	1527	0	0.66463	0.14902	0.14987	0.955463	398	1	0.66463
NonTargeting_Human_0295	1	0.85114	0.85096	0.999997	1528	0	0.85367	0.14886	0.14969	0.955463	397	1	0.85367
NonTargeting_Human_0160	1	0.85172	0.85151	0.999997	1529	0	0.77818	0.14828	0.14911	0.955463	394	1	0.77818
NonTargeting_Human_0093	1	0.8523	0.85215	0.999997	1530	0	1.0143	0.1477	0.14858	0.955463	392	1	1.0143
NonTargeting_Human_0117	1	0.85255	0.85241	0.999997	1531	0	0.82709	0.14745	0.14834	0.955463	391	1	0.82709
NonTargeting_Human_0381	1	0.85387	0.85362	0.999997	1532	0	0.83016	0.14613	0.14704	0.955463	390	1	0.83016
NonTargeting_Human_0828	1	0.85395	0.85369	0.999997	1533	0	2.0104	0.14605	0.14697	0.955463	388	1	2.0104
WNT3A	15	0.85446	0.94755	0.999997	1534	3	-0.034464	0.92397	0.96677	0.999997	1652	2	-0.034464
NonTargeting_Human_0191	1	0.85536	0.85525	0.999997	1535	0	0.75739	0.14464	0.14571	0.955463	380	1	0.75739
ERP44	14	0.85622	0.94246	0.999997	1536	2	0.25311	0.40475	0.68361	0.999997	852	4	0.25311
NonTargeting_Human_0838	1	0.85816	0.85825	0.999997	1537	0	1.0457	0.14184	0.14302	0.955463	378	1	1.0457
IL17RA	15	0.85818	0.94924	0.999997	1538	3	0.18043	0.40411	0.69273	0.999997	850	4	0.18043
NonTargeting_Human_0261	1	0.85882	0.85893	0.999997	1539	0	0.74244	0.14118	0.14233	0.955463	377	1	0.74244
NonTargeting_Human_0661	1	0.85891	0.85902	0.999997	1540	0	0.78838	0.14109	0.14223	0.955463	376	1	0.78838
NonTargeting_Human_0316	1	0.85948	0.85956	0.999997	1541	0	0.84381	0.14052	0.14166	0.955463	375	1	0.84381
NonTargeting_Human_0235	1	0.86039	0.86046	0.999997	1542	0	0.63262	0.13961	0.14069	0.955463	374	1	0.63262
NonTargeting_Human_0722	1	0.8613	0.8614	0.999997	1543	0	1.0203	0.1387	0.13985	0.955463	372	1	1.0203
NonTargeting_Human_0723	1	0.86204	0.86206	0.999997	1544	0	1.0853	0.13796	0.13899	0.955463	371	1	1.0853
NonTargeting_Human_0178	1	0.86238	0.86242	0.999997	1545	0	0.70898	0.13762	0.1387	0.955463	370	1	0.70898
VHL	15	0.86277	0.95144	0.999997	1546	2	0.67721	0.0061408	0.034006	0.863467	60	9	0.67721
NonTargeting_Human_0321	1	0.86419	0.86431	0.999997	1547	0	0.80141	0.13581	0.13688	0.955463	367	1	0.80141
PIGQ	15	0.86428	0.95221	0.999997	1548	2	0.21061	0.74435	0.89712	0.999997	1420	3	0.21061
NonTargeting_Human_0853	1	0.86452	0.86462	0.999997	1549	0	0.80815	0.13548	0.13655	0.955463	365	1	0.80815
NonTargeting_Human_0997	1	0.86485	0.86491	0.999997	1550	0	1.4063	0.13515	0.13616	0.955463	364	1	1.4063
NonTargeting_Human_0098	1	0.86634	0.86631	0.999997	1551	0	0.82972	0.13366	0.13475	0.955463	361	1	0.82972
NonTargeting_Human_0657	1	0.8665	0.86646	0.999997	1552	0	0.96857	0.1335	0.13456	0.955463	360	1	0.96857
NAA60	15	0.86694	0.95315	0.999997	1553	1	-0.061358	0.51198	0.7711	0.999997	1046	2	-0.061358
NonTargeting_Human_0739	1	0.867	0.86698	0.999997	1554	0	1.1601	0.133	0.13418	0.955463	359	1	1.1601
CARM1	15	0.86881	0.95359	0.999997	1555	2	0.90536	0.0012722	0.0087001	0.411961	36	10	0.90536
NonTargeting_Human_0787	1	0.86906	0.86895	0.999997	1556	0	0.96298	0.13094	0.13194	0.955463	356	1	0.96298
NonTargeting_Human_0560	1	0.86948	0.86926	0.999997	1557	0	1.301	0.13052	0.13152	0.955463	355	1	1.301
NonTargeting_Human_0302	1	0.87187	0.87171	0.999997	1558	0	0.70772	0.12813	0.1291	0.955463	351	1	0.70772
NonTargeting_Human_0564	1	0.87195	0.87179	0.999997	1559	0	0.85779	0.12805	0.129	0.955463	350	1	0.85779
NonTargeting_Human_0410	1	0.8722	0.87199	0.999997	1560	0	1.584	0.1278	0.12878	0.955463	348	1	1.584
NonTargeting_Human_0404	1	0.87262	0.87239	0.999997	1561	0	1.0836	0.12738	0.12838	0.955463	347	1	1.0836
NonTargeting_Human_0735	1	0.87344	0.87323	0.999997	1562	0	0.73855	0.12656	0.12772	0.955463	346	1	0.73855
NonTargeting_Human_0028	1	0.87369	0.87348	0.999997	1563	0	0.86729	0.12631	0.12751	0.955463	345	1	0.86729
NonTargeting_Human_0092	1	0.8741	0.87383	0.999997	1564	0	1.0707	0.1259	0.12704	0.955463	344	1	1.0707
CIAO1	15	0.87464	0.95507	0.999997	1565	2	0.18819	0.53613	0.7857	0.999997	1091	4	0.18819
NonTargeting_Human_0562	1	0.87501	0.87484	0.999997	1566	0	1.4193	0.12499	0.12616	0.955463	343	1	1.4193
CHRND	15	0.87599	0.95536	0.999997	1567	2	0.072305	0.17789	0.43493	0.999997	464	5	0.072305
RNF112	15	0.87712	0.95562	0.999997	1568	2	0.072772	0.92298	0.96639	0.999997	1648	2	0.072772
NonTargeting_Human_0307	1	0.87807	0.87779	0.999997	1569	0	0.90273	0.12193	0.12311	0.955463	340	1	0.90273
NonTargeting_Human_0240	1	0.87922	0.879	0.999997	1570	0	0.62519	0.12078	0.12194	0.953744	339	1	0.62519
NonTargeting_Human_0480	1	0.88005	0.87989	0.999997	1571	0	0.5914	0.11995	0.12127	0.952737	338	1	0.5914
RAB10	15	0.88006	0.95628	0.999997	1572	1	3.5959	9.3987e-20	2.8256e-06	0.000619	1	14	3.5959
NonTargeting_Human_0026	1	0.8812	0.88115	0.999997	1573	0	0.97947	0.1188	0.12001	0.951413	337	1	0.97947
NonTargeting_Human_0008	1	0.88368	0.88355	0.999997	1574	0	0.76172	0.11632	0.11745	0.939984	333	1	0.76172
NonTargeting_Human_0660	1	0.88442	0.88434	0.999997	1575	0	1.324	0.11558	0.11673	0.939984	332	1	1.324
NonTargeting_Human_0244	1	0.88566	0.88579	0.999997	1576	0	0.85856	0.11434	0.11551	0.93695	331	1	0.85856
AXIN1	15	0.8864	0.95775	0.999997	1577	1	0.52321	0.0076148	0.040596	0.875876	65	9	0.52321
NonTargeting_Human_0795	1	0.88698	0.88719	0.999997	1578	0	0.94756	0.11302	0.11421	0.93067	327	1	0.94756
NonTargeting_Human_0208	1	0.88707	0.88725	0.999997	1579	0	1.0333	0.11293	0.11412	0.93067	326	1	1.0333
NonTargeting_Human_0458	1	0.88723	0.88745	0.999997	1580	0	1.091	0.11277	0.11398	0.93067	325	1	1.091
NonTargeting_Human_0984	1	0.88773	0.88796	0.999997	1581	0	1.0208	0.11227	0.11351	0.93067	324	1	1.0208
C1orf198	15	0.88799	0.95819	0.999997	1582	2	0.59014	0.0072398	0.038844	0.875876	64	9	0.59014
NonTargeting_Human_0692	1	0.88864	0.88884	0.999997	1583	0	1.0202	0.11136	0.11263	0.93067	323	1	1.0202
NonTargeting_Human_0162	1	0.88888	0.88908	0.999997	1584	0	1.0173	0.11112	0.11241	0.93067	322	1	1.0173
C7orf26	15	0.89016	0.9587	0.999997	1585	2	0.29265	0.13117	0.35913	0.999997	357	6	0.29265
NonTargeting_Human_0453	1	0.89054	0.89063	0.999997	1586	0	1.2783	0.10946	0.11087	0.93067	319	1	1.2783
PPIAL4A	14	0.89069	0.95288	0.999997	1587	2	-0.015459	0.60174	0.82572	0.999997	1200	4	-0.015459
NonTargeting_Human_0141	1	0.8912	0.89146	0.999997	1588	0	0.5992	0.1088	0.11018	0.93067	318	1	0.5992
EXOC3	15	0.89196	0.95921	0.999997	1589	1	0.28507	0.025326	0.10851	0.929317	128	6	0.28507
NonTargeting_Human_0131	1	0.89252	0.89279	0.999997	1590	0	1.1649	0.10748	0.10874	0.929317	316	1	1.1649
NonTargeting_Human_0841	1	0.8931	0.89334	0.999997	1591	0	1.0239	0.1069	0.10811	0.929317	315	1	1.0239
KDM6A	15	0.89412	0.95981	0.999997	1592	2	0.031087	0.64347	0.85332	0.999997	1267	4	0.031087
NonTargeting_Human_0103	1	0.89483	0.89512	0.999997	1593	0	0.81472	0.10517	0.10633	0.926777	312	1	0.81472
NonTargeting_Human_0954	1	0.89632	0.89659	0.999997	1594	0	0.89479	0.10368	0.10483	0.918342	308	1	0.89479
NonTargeting_Human_0597	1	0.89739	0.89766	0.999997	1595	0	0.89606	0.10261	0.10382	0.915941	306	1	0.89606
NonTargeting_Human_0715	1	0.89764	0.89792	0.999997	1596	0	1.2569	0.10236	0.10351	0.915941	304	1	1.2569
NonTargeting_Human_0977	1	0.89879	0.89901	0.999997	1597	0	1.086	0.10121	0.10242	0.915941	301	1	1.086
NonTargeting_Human_0910	1	0.89896	0.8992	0.999997	1598	0	0.89215	0.10104	0.10231	0.915941	300	1	0.89215
NonTargeting_Human_0413	1	0.89987	0.90029	0.999997	1599	0	1.4056	0.10013	0.1012	0.915941	298	1	1.4056
NonTargeting_Human_0427	1	0.90127	0.90177	0.999997	1600	0	1.1843	0.098728	0.099708	0.909834	294	1	1.1843
HAVCR1	15	0.90134	0.96184	0.999997	1601	2	0.14875	0.19604	0.46268	0.999997	490	6	0.14875
NonTargeting_Human_0972	1	0.90292	0.90334	0.999997	1602	0	0.98397	0.097077	0.097854	0.902105	292	1	0.98397
NonTargeting_Human_0110	1	0.9035	0.90389	0.999997	1603	0	1.1048	0.096498	0.097306	0.902105	290	1	1.1048
NonTargeting_Human_0352	1	0.90408	0.90446	0.999997	1604	0	0.9276	0.09592	0.096735	0.902105	288	1	0.9276
SPAG7	15	0.90439	0.9627	0.999997	1605	2	-0.01287	0.54561	0.79153	0.999997	1111	4	-0.01287
MEF2BNB	15	0.90824	0.96392	0.999997	1606	1	0.49414	0.033829	0.13732	0.955463	143	8	0.49414
NonTargeting_Human_0159	1	0.90887	0.90926	0.999997	1607	0	1.5989	0.091131	0.091813	0.88871	283	1	1.5989
NonTargeting_Human_0761	1	0.90945	0.90979	0.999997	1608	0	1.289	0.090552	0.091237	0.888036	280	1	1.289
NonTargeting_Human_0515	1	0.91168	0.9119	0.999997	1609	0	1.1709	0.088323	0.088987	0.875876	272	1	1.1709
NonTargeting_Human_0785	1	0.91217	0.91242	0.999997	1610	0	0.9397	0.087827	0.088535	0.875876	271	1	0.9397
NonTargeting_Human_0064	1	0.91333	0.91361	0.999997	1611	0	1.3426	0.086671	0.087388	0.875876	267	1	1.3426
CDH1	15	0.91357	0.96546	0.999997	1612	2	0.54973	0.0081863	0.043212	0.875876	68	9	0.54973
NonTargeting_Human_0600	1	0.91424	0.91451	0.999997	1613	0	0.89201	0.085763	0.086569	0.875876	265	1	0.89201
NonTargeting_Human_0211	1	0.91432	0.9146	0.999997	1614	0	0.7404	0.08568	0.086478	0.875876	264	1	0.7404
THOC6	15	0.91433	0.96568	0.999997	1615	2	0.046371	0.2793	0.56873	0.999997	639	4	0.046371
SNAI1	15	0.91444	0.9657	0.999997	1616	2	0.22913	0.14534	0.38308	0.999997	383	6	0.22913
NonTargeting_Human_0612	1	0.91449	0.91475	0.999997	1617	0	1.2196	0.085515	0.08636	0.875876	263	1	1.2196
DGKK	15	0.91468	0.96576	0.999997	1618	2	0.11812	0.34486	0.63522	0.999997	754	3	0.11812
NonTargeting_Human_0628	1	0.91482	0.91514	0.999997	1619	0	0.89135	0.085185	0.086071	0.875876	262	1	0.89135
NonTargeting_Human_0400	1	0.91531	0.91556	0.999997	1620	0	1.0619	0.084689	0.085642	0.875876	261	1	1.0619
NonTargeting_Human_0747	1	0.9163	0.91653	0.999997	1621	0	1.2108	0.083698	0.084659	0.875876	259	1	1.2108
NonTargeting_Human_0282	1	0.91638	0.91661	0.999997	1622	0	1.0323	0.083615	0.084579	0.875876	258	1	1.0323
NonTargeting_Human_0713	1	0.91729	0.91768	0.999997	1623	0	1.1076	0.082707	0.083658	0.875876	255	1	1.1076
RTBDN	15	0.91755	0.96663	0.999997	1624	2	0.72598	0.00019633	0.0014495	0.101584	24	11	0.72598
NonTargeting_Human_0794	1	0.91795	0.91823	0.999997	1625	0	2.0331	0.082046	0.083076	0.875876	254	1	2.0331
PEX6	15	0.91858	0.96693	0.999997	1626	1	0.3779	0.025146	0.10785	0.929317	127	8	0.3779
NonTargeting_Human_0263	1	0.91969	0.91999	0.999997	1627	0	1.0673	0.080312	0.081268	0.875876	251	1	1.0673
NonTargeting_Human_0349	1	0.9201	0.92038	0.999997	1628	0	1.0588	0.079899	0.080844	0.875876	248	1	1.0588
TMEM221	15	0.92117	0.96773	0.999997	1629	2	0.54115	0.0019836	0.013249	0.498247	43	10	0.54115
NonTargeting_Human_0079	1	0.92365	0.92397	0.999997	1630	0	0.94279	0.076348	0.077125	0.875876	240	1	0.94279
NonTargeting_Human_0068	1	0.9253	0.92563	0.999997	1631	0	0.78196	0.074697	0.07547	0.875876	237	1	0.78196
WDR37	15	0.92553	0.96918	0.999997	1632	2	0.19367	0.018441	0.083771	0.875876	110	7	0.19367
NonTargeting_Human_0712	1	0.92563	0.92586	0.999997	1633	0	1.0473	0.074366	0.07508	0.875876	234	1	1.0473
NonTargeting_Human_0412	1	0.92605	0.92625	0.999997	1634	0	1.0623	0.073953	0.074639	0.875876	233	1	1.0623
KCNK12	15	0.92621	0.96938	0.999997	1635	1	0.4738	0.022397	0.09782	0.902105	121	8	0.4738
NonTargeting_Human_0823	1	0.92654	0.92669	0.999997	1636	0	1.3204	0.073458	0.074147	0.875876	231	1	1.3204
NonTargeting_Human_0944	1	0.92662	0.92677	0.999997	1637	0	0.94024	0.073375	0.074068	0.875876	230	1	0.94024
NonTargeting_Human_0587	1	0.92729	0.92737	0.999997	1638	0	0.89407	0.072715	0.073413	0.875876	228	1	0.89407
NonTargeting_Human_0615	1	0.92819	0.92825	0.999997	1639	0	1.3148	0.071806	0.072486	0.875876	227	1	1.3148
PDE1A	15	0.92867	0.97025	0.999997	1640	2	-0.23122	0.13636	0.36771	0.999997	368	5	-0.23122
NonTargeting_Human_0473	1	0.93034	0.93028	0.999997	1641	0	1.4608	0.069659	0.070214	0.875876	223	1	1.4608
KCTD5	15	0.93069	0.97095	0.999997	1642	2	0.3358	0.011873	0.059669	0.875876	84	6	0.3358
NonTargeting_Human_0696	1	0.93133	0.93129	0.999997	1643	0	1.2912	0.068668	0.069191	0.875876	222	1	1.2912
NonTargeting_Human_0056	1	0.93241	0.93235	0.999997	1644	0	1.2403	0.067594	0.068123	0.875876	220	1	1.2403
NonTargeting_Human_0214	1	0.93307	0.933	0.999997	1645	0	1.0878	0.066934	0.067631	0.875876	219	1	1.0878
FRYL	15	0.93319	0.9718	0.999997	1646	2	0.23592	0.26897	0.55749	0.999997	620	5	0.23592
NonTargeting_Human_0622	1	0.93331	0.93321	0.999997	1647	0	1.4895	0.066686	0.067411	0.875876	218	1	1.4895
NonTargeting_Human_0638	1	0.9334	0.93329	0.999997	1648	0	1.0202	0.066603	0.067321	0.875876	217	1	1.0202
NonTargeting_Human_0384	1	0.93563	0.93536	0.999997	1649	0	0.89446	0.064374	0.064981	0.875876	214	1	0.89446
EPN1	15	0.93618	0.97283	0.999997	1650	1	0.74395	6.5381e-05	0.00059621	0.052228	20	11	0.74395
FER	15	0.93714	0.97321	0.999997	1651	2	0.53351	0.071327	0.23568	0.987471	225	7	0.53351
NonTargeting_Human_0442	1	0.93769	0.93738	0.999997	1652	0	1.3391	0.062309	0.062822	0.875876	209	1	1.3391
NonTargeting_Human_0940	1	0.93777	0.93749	0.999997	1653	0	1.8405	0.062226	0.062709	0.875876	208	1	1.8405
NonTargeting_Human_0592	1	0.93794	0.93766	0.999997	1654	0	0.95281	0.062061	0.062596	0.875876	207	1	0.95281
PTCHD4	15	0.93797	0.97355	0.999997	1655	2	0.52549	0.037254	0.14832	0.955463	153	7	0.52549
NonTargeting_Human_0077	1	0.93819	0.93789	0.999997	1656	0	0.95104	0.061814	0.062347	0.875876	206	1	0.95104
RAP1GAP	15	0.93838	0.9737	0.999997	1657	2	0.090233	0.016593	0.077086	0.875876	103	4	0.090233
ZDHHC5	15	0.93987	0.97427	0.999997	1658	2	0.34368	0.10396	0.31112	0.987471	310	7	0.34368
NonTargeting_Human_0343	1	0.94099	0.94066	0.999997	1659	0	1.7304	0.059006	0.059561	0.875876	204	1	1.7304
NonTargeting_Human_0846	1	0.94223	0.94207	0.999997	1660	0	1.0539	0.057767	0.058307	0.875876	201	1	1.0539
STK40	15	0.94237	0.97508	0.999997	1661	2	0.35146	0.0019761	0.013227	0.498247	42	6	0.35146
EXOC2	15	0.94283	0.97528	0.999997	1662	2	0.33553	0.0010178	0.0071799	0.349422	35	7	0.33553
STX4	15	0.9432	0.97542	0.999997	1663	1	0.66983	0.00020988	0.0015682	0.105674	26	11	0.66983
NonTargeting_Human_0419	1	0.94331	0.94293	0.999997	1664	0	1.8578	0.056693	0.057165	0.875876	199	1	1.8578
NonTargeting_Human_0883	1	0.94347	0.94308	0.999997	1665	0	1.8283	0.056528	0.057047	0.875876	197	1	1.8283
NonTargeting_Human_0175	1	0.94372	0.94329	0.999997	1666	0	1.2947	0.05628	0.056809	0.875876	195	1	1.2947
SULT6B1	15	0.94382	0.97571	0.999997	1667	2	0.071395	0.032279	0.13237	0.955463	142	5	0.071395
SPSB3	15	0.94413	0.97583	0.999997	1668	1	0.089011	0.3537	0.6439	0.999997	768	5	0.089011
NonTargeting_Human_0129	1	0.94422	0.94388	0.999997	1669	0	1.8639	0.055785	0.056278	0.875876	193	1	1.8639
NonTargeting_Human_0223	1	0.94455	0.9442	0.999997	1670	0	1.4257	0.055455	0.055928	0.875876	192	1	1.4257
C9orf41	15	0.94471	0.97606	0.999997	1671	2	0.53845	0.011091	0.056521	0.875876	80	7	0.53845
UHRF2	15	0.94532	0.9763	0.999997	1672	2	0.568	0.01983	0.088739	0.875876	114	7	0.568
ZNF124	15	0.94576	0.97648	0.999997	1673	2	0.16381	0.056079	0.19844	0.97951	194	5	0.16381
NSFL1C	15	0.94591	0.97654	0.999997	1674	2	-0.025289	0.23033	0.51241	0.999997	549	3	-0.025289
NonTargeting_Human_0006	1	0.94628	0.94591	0.999997	1675	0	1.5713	0.05372	0.054244	0.875876	188	1	1.5713
NonTargeting_Human_0859	1	0.94669	0.94633	0.999997	1676	0	1.1975	0.053307	0.053752	0.875876	185	1	1.1975
NonTargeting_Human_0877	1	0.94702	0.94672	0.999997	1677	0	1.464	0.052977	0.053447	0.875876	184	1	1.464
NonTargeting_Human_0459	1	0.94909	0.94877	0.999997	1678	0	1.2516	0.050913	0.05161	0.875876	179	1	1.2516
MID1	15	0.94934	0.97788	0.999997	1679	2	0.056508	0.086757	0.27226	0.987471	268	6	0.056508
DNAJC18	15	0.9505	0.97841	0.999997	1680	2	0.28899	0.090075	0.27982	0.987471	277	7	0.28899
NonTargeting_Human_0918	1	0.95099	0.95072	0.999997	1681	0	1.5433	0.049013	0.049723	0.875876	175	1	1.5433
NonTargeting_Human_0444	1	0.95115	0.95087	0.999997	1682	0	1.3159	0.048848	0.049513	0.875876	174	1	1.3159
EPHA2	15	0.95177	0.97892	0.999997	1683	2	0.25643	0.15902	0.40497	0.999997	425	6	0.25643
PRELP	15	0.95275	0.9793	0.999997	1684	1	0.094605	0.73103	0.89158	0.999997	1402	3	0.094605
NonTargeting_Human_0670	1	0.95313	0.95279	0.999997	1685	0	1.2764	0.046866	0.047338	0.875876	170	1	1.2764
NonTargeting_Human_0801	1	0.95363	0.95327	0.999997	1686	0	2.1388	0.04637	0.046829	0.875876	167	1	2.1388
NonTargeting_Human_0049	1	0.95413	0.95379	0.999997	1687	0	2.0166	0.045875	0.046337	0.875876	166	1	2.0166
ZNF213	15	0.9553	0.98038	0.999997	1688	2	-0.016527	0.463	0.74023	0.999997	955	4	-0.016527
NonTargeting_Human_0292	1	0.95578	0.95537	0.999997	1689	0	1.7134	0.044223	0.044704	0.875876	162	1	1.7134
NonTargeting_Human_0237	1	0.95627	0.95599	0.999997	1690	0	2.5033	0.043728	0.044145	0.875876	161	1	2.5033
NonTargeting_Human_0374	1	0.95693	0.95675	0.999997	1691	0	1.3373	0.043067	0.043517	0.875876	159	1	1.3373
NonTargeting_Human_0198	1	0.95743	0.95717	0.999997	1692	0	1.2647	0.042572	0.042975	0.875876	158	1	1.2647
NonTargeting_Human_0147	1	0.95982	0.95957	0.999997	1693	0	2.6176	0.040177	0.040477	0.875876	156	1	2.6176
NonTargeting_Human_0057	1	0.96114	0.96111	0.999997	1694	0	1.4519	0.038855	0.039149	0.875876	155	1	1.4519
CUL7	15	0.96168	0.98329	0.999997	1695	1	0.62467	0.0026518	0.017284	0.560781	49	9	0.62467
NonTargeting_Human_0472	1	0.96329	0.9632	0.999997	1696	0	2.5751	0.036708	0.036917	0.875876	152	1	2.5751
NonTargeting_Human_0489	1	0.96461	0.96456	0.999997	1697	0	2.1839	0.035387	0.035527	0.875876	147	1	2.1839
CAND1	15	0.96502	0.98402	0.999997	1698	1	0.2578	0.073533	0.24115	0.987471	232	6	0.2578
NonTargeting_Human_0831	1	0.96527	0.96523	0.999997	1699	0	1.6706	0.034726	0.034826	0.871641	145	1	1.6706
NonTargeting_Human_0811	1	0.96825	0.96819	0.999997	1700	0	2.513	0.031753	0.031831	0.824913	140	1	2.513
NCOR1	15	0.96828	0.98462	0.999997	1701	1	0.88231	0.0001035	0.00082226	0.0686	21	11	0.88231
NonTargeting_Human_0904	1	0.9732	0.97294	0.999997	1702	0	1.9584	0.026798	0.026959	0.761817	132	1	1.9584
VPS33A	15	0.9736	0.98572	0.999997	1703	1	0.088823	0.83641	0.93872	0.999997	1542	2	0.088823
NonTargeting_Human_0926	1	0.97403	0.9738	0.999997	1704	0	3.8921	0.025972	0.026242	0.753693	129	1	3.8921
SIN3B	15	0.97718	0.98655	0.999997	1705	1	0.34354	0.0057325	0.032	0.824913	59	7	0.34354
ANO8	15	0.97722	0.98655	0.999997	1706	1	0.69545	0.00081466	0.0058801	0.299151	33	9	0.69545
NonTargeting_Human_0285	1	0.97816	0.97797	0.999997	1707	0	4.0929	0.021843	0.022116	0.679781	119	1	4.0929
RAB5C	15	0.9795	0.98723	0.999997	1708	1	0.90596	0.00041076	0.0033032	0.186682	31	9	0.90596
MEF2B	15	0.98069	0.98755	0.999997	1709	1	0.89996	0.00027496	0.0021899	0.142098	27	10	0.89996
DENND4A	15	0.98163	0.98782	0.999997	1710	1	1.2841	9.3945e-06	9.3246e-05	0.011669	14	12	1.2841
NonTargeting_Human_0576	1	0.98344	0.98356	0.999997	1711	0	4.3458	0.016558	0.016708	0.560781	102	1	4.3458
UBE2O	15	0.98484	0.98892	0.999997	1712	1	0.15244	0.26842	0.55683	0.999997	618	5	0.15244
NonTargeting_Human_0613	1	0.98633	0.98646	0.999997	1713	0	4.3869	0.013668	0.013588	0.498247	93	1	4.3869
NonTargeting_Human_0964	1	0.9865	0.98662	0.999997	1714	0	4.5914	0.013502	0.013425	0.498247	92	1	4.5914
EHD2	15	0.9885	0.99049	0.999997	1715	1	0.5378	0.021231	0.093588	0.900908	117	7	0.5378
NonTargeting_Human_0312	1	0.98893	0.98916	0.999997	1716	0	4.8243	0.011066	0.010972	0.480569	79	1	4.8243
TGIF1	15	0.98906	0.9908	0.999997	1717	1	0.5067	0.0026232	0.01716	0.560781	48	7	0.5067
SOCS1	15	0.9908	0.99179	0.999997	1718	1	0.12701	0.99505	0.99494	0.999997	1730	0	0.12701
hsa-mir-6515	13	0.99115	0.99123	0.999997	1719	0	0.71789	0.011116	0.053758	0.875876	81	7	0.71789
TREM1	15	0.99209	0.99264	0.999997	1720	1	0.43562	0.3918	0.68062	0.999997	827	5	0.43562
ANXA13	15	0.9932	0.99349	0.999997	1721	1	-0.063876	0.17131	0.4242	0.999997	451	4	-0.063876
TMEM30A	15	0.99402	0.99411	0.999997	1722	1	0.46069	0.052551	0.18932	0.97864	183	7	0.46069
ATP6V1B1	15	0.99452	0.99446	0.999997	1723	1	0.19174	0.035926	0.14435	0.955463	150	6	0.19174
DDX27	15	0.99468	0.99461	0.999997	1724	1	0.55208	0.021656	0.095147	0.902105	118	8	0.55208
STX10	15	0.99501	0.9949	0.999997	1725	0	0.14158	0.41516	0.70313	0.999997	868	5	0.14158
IRF2BP2	15	0.9952	0.99511	0.999997	1726	0	1.5307	7.0068e-09	2.8256e-06	0.000619	7	12	1.5307
DNASE2	15	0.99568	0.99559	0.999997	1727	0	0.7693	0.0042937	0.025303	0.738861	55	8	0.7693
MDH1	15	0.99587	0.9958	0.999997	1728	0	0.55925	0.034804	0.14044	0.955463	146	7	0.55925
NonTargeting_Human_0455	1	0.99633	0.99652	0.999997	1729	0	5.8401	0.003675	0.0036931	0.202197	52	1	5.8401
NUDT5	15	0.99662	0.99668	0.999997	1730	0	0.32148	0.35141	0.64144	0.999997	765	4	0.32148
OR5AR1	15	0.99753	0.99757	0.999997	1731	0	0.17182	0.38527	0.6743	0.999997	818	5	0.17182
EXOC1	15	0.99754	0.99757	0.999997	1732	0	0.98972	8.784e-07	2.5431e-05	0.004455	10	12	0.98972
WDR18	15	0.99775	0.99779	0.999997	1733	0	0.39742	0.0090738	0.047479	0.875876	73	7	0.39742
MYLIP	15	0.9979	0.99793	0.999997	1734	0	0.62333	0.0080422	0.042551	0.875876	66	8	0.62333
EPB41	15	0.9984	0.99843	0.999997	1735	0	-0.058289	0.32271	0.61308	0.999997	720	3	-0.058289
STK11	15	0.99869	0.99864	0.999997	1736	0	0.62731	0.00030676	0.0024555	0.153642	28	10	0.62731
FBXL5	15	0.99909	0.99908	0.999997	1737	0	1.2571	1.7189e-05	0.00017236	0.020132	15	11	1.2571
SUSD5	15	0.99917	0.99917	0.999997	1738	0	0.37866	0.089828	0.27935	0.987471	276	7	0.37866
SREBF2	15	0.99923	0.99921	0.999997	1739	0	0.3059	0.33005	0.62087	0.999997	733	5	0.3059
C19orf52	15	0.99941	0.99943	0.999997	1740	0	0.70207	0.001729	0.011639	0.493753	39	10	0.70207
KDM3B	15	0.99965	0.9997	0.999997	1741	0	0.69418	0.00037547	0.0030036	0.181461	29	10	0.69418
C19orf57	15	0.9999	0.99992	0.999997	1742	0	1.2833	1.7679e-06	3.6733e-05	0.005851	11	13	1.2833
HDAC3	15	0.99995	0.99997	0.999997	1743	0	1.2511	5.4762e-08	8.4769e-06	0.00165	9	13	1.2511
SCAP	15	0.99997	0.99998	0.999997	1744	0	0.9786	1.7105e-08	2.8256e-06	0.000619	8	14	0.9786
NDUFA13	15	0.99999	0.99999	0.999997	1745	0	0.8391	0.00040434	0.003241	0.186682	30	10	0.8391
MBTPS1	15	0.99999	1	0.999997	1746	0	0.7788	7.7112e-06	8.7594e-05	0.011669	13	12	0.7788
EXOC8	15	1	1	0.999997	1747	0	1.9048	3.1615e-15	2.8256e-06	0.000619	5	14	1.9048
CERS2	15	1	1	0.999997	1748	0	0.79368	4.7916e-06	7.6292e-05	0.011139	12	13	0.79368
EXOC7	15	1	1	0.999997	1749	0	1.5713	5.5834e-14	2.8256e-06	0.000619	6	15	1.5713
AP2M1	15	1	1	0.999997	1750	0	2.5748	1.0484e-15	2.8256e-06	0.000619	4	15	2.5748
RABIF	15	1	1	0.999997	1751	0	3.1934	2.7466e-19	2.8256e-06	0.000619	2	15	3.1934
GDI2	15	1	1	0.999997	1752	0	2.2408	4.2178e-17	2.8256e-06	0.000619	3	15	2.2408

## Sheet: Tf_uptake_gRNA
sgrna	Gene	control_count	treatment_count	control_mean	treat_mean	LFC	control_var	adj_var	score	p.low	p.high	p.twosided	FDR	high_in_treatment
TFRC_4	TFRC	1888.6/2133.2/2065.7	70.682/17.018/0	2065.7	17.018	-6.8418	17959	84373	7.0531	3.0181e-13	1	6.0362e-13	4.4381e-11	FALSE
TFRC_15	TFRC	703.54/1329.8/1248.8	0/26.472/0	1248.8	0	-10.288	151950	51008	6.1499	3.876e-10	1	7.752e-10	4.8027e-08	FALSE
TFRC_12	TFRC	1154.7/1351.5/1110.5	1.0394/0/56.115	1154.7	1.0394	-9.1464	20342	47164	5.9424	1.404e-09	1	2.808e-09	1.632e-07	FALSE
TFRC_6	TFRC	1079.5/977.9/1467	50.933/0/0	1079.5	0	-10.078	80240	44093	5.8002	3.3122e-09	1	6.6243e-09	3.7332e-07	FALSE
TFRC_2	TFRC	1334/1800/1173.4	48.854/0/108.43	1334	48.854	-4.743	121480	54488	5.5678	1.2895e-08	1	2.5791e-08	1.3928e-06	FALSE
TFRC_7	TFRC	1175.7/1314.1/1062.6	31.183/0.94544/58.017	1175.7	31.183	-5.1923	15970	48020	5.3354	4.7654e-08	1	9.5308e-08	4.7674e-06	FALSE
TFRC_11	TFRC	1251.6/1220.4/931.3	115.38/2.8363/63.724	1220.4	63.724	-4.2381	42277	49847	5.2241	8.7486e-08	1	1.7497e-07	8.4076e-06	FALSE
TFRC_10	TFRC	532.17/903.97/455.01	8.3156/0/0	532.17	0	-9.0585	72093	21736	4.4742	3.8351e-06	1	7.6702e-06	0.00029813	FALSE
TFRC_3	TFRC	481.56/417.97/716.66	20.789/0/0	481.56	0	-8.9146	29658	19669	4.3289	7.4925e-06	0.99999	1.4985e-05	0.00056102	FALSE
TFRC_8	TFRC	444.68/535.28/315.76	0/0/50.409	444.68	0	-8.7999	12415	18163	4.2194	1.2248e-05	0.99999	2.4496e-05	0.00086158	FALSE
VPS29_10	VPS29	333.33/309.54/23.948	41.578/0/0	309.54	0	-8.2786	41064	12643	3.7846	7.6965e-05	0.99992	0.00015393	0.0047562	FALSE
VPS29_8	VPS29	328.99/277.99/70.069	1.0394/73.745/0	277.99	1.0394	-7.0959	22916	11354	3.6488	0.00013174	0.99987	0.00026347	0.0076296	FALSE
OSTC_10	OSTC	215.47/311.51/66.522	176.71/0/0	215.47	0	-7.758	15705	8800.8	3.437	0.00029409	0.99971	0.00058819	0.015372	FALSE
TBPL2_8	TBPL2	245.12/0/495.81	206.85/1.8909/0	245.12	1.8909	-6.4117	61464	10012	3.3622	0.00038667	0.99961	0.00077335	0.019542	FALSE
TFRC_13	TFRC	320.32/775.81/580.96	73.801/6.6181/98.915	580.96	73.801	-2.9598	52952	23729	3.3421	0.00041568	0.99958	0.00083136	0.020708	FALSE
MOCS3_8	MOCS3	247.29/189.27/21.287	113.3/0.94544/0	189.27	0.94544	-6.6118	15792	7730.6	3.3298	0.00043458	0.99957	0.00086916	0.021431	FALSE
FNDC3B_5	FNDC3B	177.87/118.29/396.47	143.44/0/0	177.87	0	-7.4828	25667	7265.1	3.2812	0.00051687	0.99948	0.0010337	0.025083	FALSE
PGS1_3	PGS1	176.43/0/199.56	20.789/0/0	176.43	0	-7.4711	15831	7206	3.2749	0.00052847	0.99947	0.0010569	0.025544	FALSE
HNF4A_9	HNF4A	422.99/684.14/855.02	345.1/136.14/138.86	684.14	138.86	-2.2924	48700	27943	3.2731	0.00053191	0.99947	0.0010638	0.02566	FALSE
CPSF4_3	CPSF4	175.7/184.34/25.722	0/0.94544/31.386	175.7	0.94544	-6.5051	11285	7176.5	3.2718	0.00053437	0.99947	0.0010687	0.025728	FALSE
PAM16_8	PAM16	180.04/165.61/222.63	1.0394/0/125.55	180.04	1.0394	-6.472	1010.8	7353.7	3.2634	0.00055035	0.99945	0.0011007	0.026341	FALSE
ARPC4_9	ARPC4	171.37/229.69/25.722	0/0/29.484	171.37	0	-7.4293	12307	6999.3	3.2528	0.00057132	0.99943	0.0011426	0.027079	FALSE
VPS29_12	VPS29	169.92/52.247/166.75	63.406/0/0	166.75	0	-7.3901	6560.2	6810.7	3.2324	0.00061374	0.99939	0.0012275	0.028536	FALSE
CEBPA_9	CEBPA	125.09/158.71/164.09	0/104/0.95111	158.71	0.95111	-6.355	579.67	6482.5	3.1946	0.00070023	0.9993	0.0014005	0.031536	FALSE
PRDM8_12	PRDM8	63.629/176.46/153.44	0/134.25/0	153.44	0	-7.2709	4298.1	6267.3	3.1722	0.00075654	0.99924	0.0015131	0.033699	FALSE
SNRPD1_3	SNRPD1	220.53/31.545/152.56	90.432/0.94544/0	152.56	0.94544	-6.3025	9632.3	6231	3.1681	0.00076729	0.99923	0.0015346	0.034116	FALSE
CDIPT_6	CDIPT	148.95/267.15/1.7739	0/0/47.555	148.95	0	-7.2283	17816	6083.8	3.1513	0.00081277	0.99919	0.0016255	0.035876	FALSE
TFRC_5	TFRC	412.87/485.01/415.98	138.25/30.254/29.484	415.98	30.254	-3.7379	2387.1	16990	3.1435	0.00083456	0.99917	0.0016691	0.036508	FALSE
GIGYF2_3	GIGYF2	70.86/181.38/146.35	0/0/130.3	146.35	0	-7.2031	3463	5977.5	3.1391	0.00084747	0.99915	0.0016949	0.036941	FALSE
WBSCR16_5	WBSCR16	144.61/128.15/144.57	0/47.272/0	144.57	0	-7.1856	134.83	5905	3.1307	0.00087207	0.99913	0.0017441	0.037676	FALSE
FNDC3B_11	FNDC3B	424.44/349.95/290.03	72.761/16.073/10.462	349.95	16.073	-4.3615	4569	14294	3.1199	0.0009046	0.9991	0.0018092	0.038944	FALSE
FNDC3B_6	FNDC3B	881.41/530.35/573.86	100.83/93.599/255.85	573.86	100.83	-2.4971	48240	23439	3.1173	0.0009127	0.99909	0.0018254	0.039223	FALSE
ZBTB8OS_3	ZBTB8OS	36.153/229.69/141.03	0/0/79.893	141.03	0	-7.15	9429.7	5760.1	3.1137	0.0009237	0.99908	0.0018474	0.039557	FALSE
TFRC_1	TFRC	471.44/389.39/329.06	1.0394/41.599/25.68	389.39	25.68	-3.8711	5185.7	15904	3.1037	0.00095546	0.99904	0.0019109	0.040632	FALSE
USP22_4	USP22	487.34/1082.4/703.36	227.64/153.16/179.76	703.36	179.76	-1.9622	95166	28728	3.0941	0.00098692	0.99901	0.0019738	0.041607	FALSE
TFRC_14	TFRC	455.53/1210.5/418.64	147.6/28.363/48.506	455.53	48.506	-3.205	285710	18606	3.0892	0.0010036	0.999	0.0020071	0.042185	FALSE
GNB2L1_10	GNB2L1	177.87/135.05/120.63	0/0/222.56	135.05	0	-7.088	1020.8	5516.1	3.0848	0.0010186	0.99898	0.0020372	0.042721	FALSE
POLR3H_3	POLR3H	134.49/112.38/165.86	64.446/0/0	134.49	0	-7.082	736.49	5493.1	3.082	0.0010281	0.99897	0.0020562	0.043017	FALSE
METTL17_7	METTL17	101.95/135.05/131.27	70.682/0/0	131.27	0	-7.0473	436.92	5361.6	3.0661	0.0010844	0.99892	0.0021688	0.045171	FALSE
FNDC3B_2	FNDC3B	79.537/202.09/130.38	110.18/0/0	130.38	0	-7.0376	3863.4	5325.4	3.0617	0.0011005	0.9989	0.002201	0.045764	FALSE
ACTR6_4	ACTR6	64.352/238.56/173.84	193.34/0/1.9022	173.84	1.9022	-5.9128	8088.3	7100.5	3.0566	0.0011194	0.99888	0.0022388	0.046391	FALSE
COPS3_12	COPS3	131.6/129.14/21.287	0/0/177.86	129.14	0	-7.0239	5819	5274.6	3.0555	0.0011236	0.99888	0.0022472	0.046407	FALSE
CSNK1A1_3	CSNK1A1	496.74/188.29/563.22	119.54/71.854/44.702	496.74	71.854	-2.7723	49782	20289	3.0397	0.0011839	0.99882	0.0023678	0.048209	FALSE
PGS1_15	PGS1	62.906/127.17/125.95	0/0/0	125.95	0	-6.9881	1987.8	5144.2	3.0394	0.0011853	0.99881	0.0023706	0.048209	FALSE
GNB2L1_2	GNB2L1	125.09/145.9/1.7739	25.986/0/0	125.09	0	-6.9783	7819.8	5109.2	3.035	0.0012026	0.9988	0.0024052	0.048681	FALSE
PRPF6_12	PRPF6	122.92/54.218/155.22	0/0/171.2	122.92	0	-6.9533	2881.5	5020.6	3.0239	0.0012475	0.99875	0.002495	0.050085	FALSE
VPS29_5	VPS29	178.6/21.687/118.85	36.381/0/0	118.85	0	-6.9051	6505.2	4854.4	3.0029	0.0013371	0.99866	0.0026743	0.052986	FALSE
ALG14_15	ALG14	13.015/361.78/117.08	0/0/0.95111	117.08	0	-6.8836	35355	4782	2.9936	0.0013785	0.99862	0.0027571	0.054187	FALSE
CCDC53_9	CCDC53	112.8/145.9/52.33	66.525/0/0	112.8	0	-6.8303	2375.9	4607.1	2.9709	0.0014848	0.99852	0.0029695	0.057346	FALSE
MED12_14	MED12	89.66/112.38/160.54	0/0/0	112.38	0	-6.825	1417.7	4590.1	2.9686	0.0014956	0.9985	0.0029913	0.057584	FALSE
HIST2H2BF_10	HIST2H2BF	120.03/32.531/111.76	0/0/127.45	111.76	0	-6.8171	3172.5	4564.6	2.9653	0.001512	0.99849	0.0030241	0.057941	FALSE
CAPZB_4	CAPZB	107.74/23.659/114.42	37.42/0.94544/0	107.74	0.94544	-5.8046	3556.8	4400.4	2.9434	0.001623	0.99838	0.003246	0.061422	FALSE
GAGE12B_6	GAGE12B	107.01/148.85/31.93	69.643/0/0	107.01	0	-6.7551	3694	4370.9	2.9395	0.001644	0.99836	0.0032879	0.061832	FALSE
FNDC3B_10	FNDC3B	486.62/517.54/700.69	95.629/121.96/75.137	517.54	95.629	-2.4239	17251	21138	2.9347	0.0016692	0.99833	0.0033383	0.062684	FALSE
PFDN2_13	PFDN2	85.321/170.54/105.55	0/21.745/0	105.55	0	-6.7354	2316.6	4311	2.9314	0.0016874	0.99831	0.0033749	0.062891	FALSE
HYOU1_10	HYOU1	146.06/0.98579/104.66	0/0/49.458	104.66	0	-6.7233	6231.1	4274.8	2.9264	0.0017144	0.99829	0.0034289	0.063698	FALSE
WDR82_8	WDR82	100.51/103.51/137.48	0/0/61.822	103.51	0	-6.7075	581.5	4227.7	2.92	0.0017503	0.99825	0.0035006	0.064749	FALSE
TAF1B_15	TAF1B	41.214/142.94/188.92	1.0394/1.8909/12.364	142.94	1.8909	-5.6378	6231.1	5838.2	2.9092	0.0018117	0.99819	0.0036234	0.066702	FALSE
KLHDC7B_8	KLHDC7B	86.767/373.61/101.11	0/0/157.88	101.11	0	-6.674	37231	4129.9	2.9065	0.0018277	0.99817	0.0036553	0.067189	FALSE
PFN1_6	PFN1	32.538/159.7/101.11	169.43/0/0.95111	101.11	0.95111	-5.7097	4067.4	4129.9	2.9046	0.0018387	0.99816	0.0036775	0.067292	FALSE
WDR82_4	WDR82	141/99.565/52.33	103.94/0/0	99.565	0	-6.652	1973.9	4066.6	2.8976	0.0018799	0.99812	0.0037598	0.068286	FALSE
MED12_10	MED12	281.27/692.02/360.1	32.223/86.981/12.364	360.1	32.223	-3.4422	58193	14708	2.8877	0.0019403	0.99806	0.0038806	0.070168	FALSE
PGS1_10	PGS1	114.24/85.764/96.678	45.736/0.94544/0	96.678	0.94544	-5.6499	213.84	3948.7	2.881	0.0019821	0.99802	0.0039642	0.071362	FALSE
SRP14_14	SRP14	69.414/122.24/96.678	0/0/25.68	96.678	0	-6.61	698.32	3948.7	2.881	0.0019821	0.99802	0.0039642	0.071362	FALSE
MSTO1_5	MSTO1	5.0614/125.2/95.791	33.262/0/0	95.791	0	-6.5968	4548.2	3912.5	2.8758	0.0020149	0.99799	0.0040298	0.072346	FALSE
DNLZ_7	DNLZ	166.3/82.806/94.904	0/7.5635/0	94.904	0	-6.5835	2622.1	3876.3	2.8706	0.0020483	0.99795	0.0040966	0.073414	FALSE
USP50_3	USP50	0/93.65/110.87	195.42/0/0	93.65	0	-6.5645	4533.4	3825.1	2.8632	0.0020967	0.9979	0.0041934	0.074499	FALSE
ATXN7L3_14	ATXN7L3	420.82/423.89/400.02	57.17/36.872/174.05	420.82	57.17	-2.8583	221.12	17188	2.8616	0.0021079	0.99789	0.0042157	0.074677	FALSE
ARPC4_3	ARPC4	138.83/5.9147/93.13	0/0/30.435	93.13	0	-6.5566	4847.4	3803.8	2.8602	0.0021172	0.99788	0.0042344	0.074683	FALSE
PTPMT1_3	PTPMT1	58.568/138.01/149.9	2.0789/171.13/0	138.01	2.0789	-5.4966	3226.2	5636.9	2.8533	0.0021633	0.99784	0.0043266	0.0762	FALSE
TMEM258_7	TMEM258	91.829/339.11/0.88695	0/0.94544/61.822	91.829	0.94544	-5.5764	34709	3750.7	2.8524	0.0021695	0.99783	0.0043391	0.076306	FALSE
TOMM22_5	TOMM22	114.97/91.678/60.313	0/0/27.582	91.678	0	-6.5342	763.07	3744.5	2.8515	0.0021757	0.99782	0.0043514	0.076306	FALSE
CSNK1A1_15	CSNK1A1	41.214/91.678/147.23	0/0.94544/0	91.678	0	-6.5342	2816.5	3744.5	2.8515	0.0021757	0.99782	0.0043514	0.076306	FALSE
SNX1_6	SNX1	91.106/93.65/0	1.0394/0/0	91.106	0	-6.5252	4153.4	3721.1	2.8481	0.0021993	0.9978	0.0043986	0.076931	FALSE
FNDC3B_7	FNDC3B	182.93/472.19/533.95	168.39/0/83.697	472.19	83.697	-2.482	43742	19286	2.8423	0.0022395	0.99776	0.0044789	0.078093	FALSE
NonTargeting_Human_0616	NonTargeting_Human_0616	89.66/80.835/139.25	0/0/86.551	89.66	0	-6.5024	1268.6	3662.1	2.8393	0.0022604	0.99774	0.0045208	0.078544	FALSE
PPP1R8_5	PPP1R8	88.213/85.764/105.55	89.392/0/0	88.213	0	-6.4792	153.24	3603	2.8305	0.0023236	0.99768	0.0046471	0.079885	FALSE
TOMM22_13	TOMM22	87.49/102.52/34.591	0/0.94544/148.37	87.49	0.94544	-5.5073	1512.1	3573.5	2.8261	0.002356	0.99764	0.0047119	0.080632	FALSE
POLR3H_6	POLR3H	96.167/0/86.035	0/0/42.8	86.035	0	-6.4435	3752.3	3514	2.8171	0.0024229	0.99758	0.0048459	0.082023	FALSE
CSNK1A1_13	CSNK1A1	58.568/119.28/85.148	0/102.11/0	85.148	0	-6.4287	935.76	3477.8	2.8116	0.0024649	0.99754	0.0049298	0.08299	FALSE
DYRK1A_8	DYRK1A	613.88/604.29/574.75	164.23/70.908/370.93	604.29	164.23	-1.8731	482.33	24682	2.8087	0.0024871	0.99751	0.0049742	0.083623	FALSE
GAPDH_2	GAPDH	130.87/0/84.261	0/7.5635/0	84.261	0	-6.4138	4636.3	3441.6	2.806	0.0025078	0.99749	0.0050155	0.084086	FALSE
NHLRC2_14	NHLRC2	26.753/143.93/84.261	0/21.745/0	84.261	0	-6.4138	3433.5	3441.6	2.806	0.0025078	0.99749	0.0050155	0.084086	FALSE
HNRNPU_6	HNRNPU	26.753/83.792/131.27	0/12.291/0	83.792	0	-6.4059	2753.8	3422.4	2.8031	0.0025308	0.99747	0.0050616	0.08451	FALSE
ATP6V0D1_3	ATP6V0D1	29.645/81.82/103.77	114.34/0.94544/0	81.82	0.94544	-5.4118	1602.1	3341.9	2.7906	0.0026307	0.99737	0.0052613	0.087725	FALSE
PRMT1_3	PRMT1	134.49/28.588/81.6	0/0/28.533	81.6	0	-6.3681	2803.8	3332.9	2.7892	0.0026421	0.99736	0.0052843	0.087987	FALSE
RALGAPA2_6	RALGAPA2	451.19/832.99/596.92	127.85/234.47/163.59	596.92	163.59	-1.8611	38483	24381	2.783	0.0026926	0.99731	0.0053851	0.089351	FALSE
VPS29_7	VPS29	212.58/132.1/202.23	28.065/0/6.6577	202.23	6.6577	-4.73	2512.7	8259.8	2.7818	0.0027027	0.9973	0.0054054	0.08942	FALSE
USP22_12	USP22	85.321/298.69/85.148	1.0394/0.94544/20.924	85.321	1.0394	-5.4035	22764	3484.9	2.7817	0.002704	0.9973	0.0054079	0.08942	FALSE
COG5_3	COG5	33.984/84.778/136.59	1.0394/0/171.2	84.778	1.0394	-5.3944	2632.3	3462.7	2.7782	0.0027326	0.99727	0.0054653	0.089792	FALSE
FUNDC2_6	FUNDC2	41.938/259.26/79.826	0/0/17.12	79.826	0	-6.3367	16816	3260.4	2.7778	0.0027368	0.99726	0.0054736	0.089792	FALSE
TAF10_2	TAF10	78.814/157.73/31.93	0/18.909/0	78.814	0	-6.3186	4212.6	3219.1	2.7712	0.0027927	0.99721	0.0055855	0.09126	FALSE
ARPC3_7	ARPC3	78.814/87.735/0	54.051/0/0.95111	78.814	0.95111	-5.3543	3145.6	3219.1	2.7692	0.0028097	0.99719	0.0056193	0.091567	FALSE
AHSP_10	AHSP	175.7/349.95/173.84	1.0394/80.363/4.7555	175.7	4.7555	-4.9402	15183	7176.5	2.7684	0.0028162	0.99718	0.0056325	0.091659	FALSE
CENPA_12	CENPA	78.091/104.49/71.843	106.02/0/0	78.091	0	-6.3054	368.07	3189.6	2.7664	0.0028336	0.99717	0.0056672	0.091765	FALSE
DHX36_4	DHX36	57.122/133.08/78.052	74.84/0.94544/0	78.052	0.94544	-5.3446	1733.2	3188	2.7662	0.0028358	0.99716	0.0056716	0.091765	FALSE
FNDC3B_3	FNDC3B	379.61/163.64/306.89	24.947/27.418/0	306.89	24.947	-3.5688	12904	12535	2.7653	0.0028436	0.99716	0.0056872	0.091765	FALSE
SORT1_4	SORT1	78.091/77.877/69.182	0/0/0	77.877	0	-6.3015	37.822	3180.8	2.765	0.0028458	0.99715	0.0056916	0.091765	FALSE
NMT1_1	NMT1	14.461/77.877/113.53	16.631/0/0	77.877	0	-6.3015	2646.4	3180.8	2.765	0.0028458	0.99715	0.0056916	0.091765	FALSE
PIM2_5	PIM2	397.68/915.8/677.63	197.49/218.4/320.52	677.63	218.4	-1.6291	67547	27677	2.763	0.0028633	0.99714	0.0057267	0.092209	FALSE
CEBPA_3	CEBPA	222.7/58.161/77.165	0/0/44.702	77.165	0	-6.2885	10771	3151.8	2.7603	0.002887	0.99711	0.005774	0.092848	FALSE
TAF1B_11	TAF1B	33.261/76.891/149.01	73.801/0/0	76.891	0	-6.2834	3552.2	3140.6	2.7585	0.0029031	0.9971	0.0058061	0.093241	FALSE
FNDC3B_8	FNDC3B	114.24/117.31/0.88695	0/1.8909/8.56	114.24	1.8909	-5.317	6429.6	4666.2	2.7556	0.0029293	0.99707	0.0058586	0.093838	FALSE
SYS1_2	SYS1	79.537/58.161/76.278	62.367/0.94544/0	76.278	0.94544	-5.3119	169.42	3115.5	2.7545	0.0029394	0.99706	0.0058788	0.093915	FALSE
ATP5F1_13	ATP5F1	95.444/75.906/52.33	85.235/0.94544/0	75.906	0.94544	-5.3049	468.77	3100.3	2.752	0.0029618	0.99704	0.0059236	0.094506	FALSE
SAP130_14	SAP130	50.614/120.27/78.939	1.0394/0/41.849	78.939	1.0394	-5.2926	1255.1	3224.2	2.7406	0.0030662	0.99693	0.0061325	0.096952	FALSE
VPS35_2	VPS35	475.77/236.59/502.9	98.747/348.87/52.311	475.77	98.747	-2.257	28973	19433	2.7371	0.0030989	0.9969	0.0061977	0.097529	FALSE
PPIL2_8	PPIL2	7.2306/85.764/73.617	0/0/0	73.617	0	-6.2214	2277.4	3006.8	2.7366	0.0031041	0.9969	0.0062083	0.097529	FALSE
WBSCR16_8	WBSCR16	116.41/43.375/140.14	2.0789/90.762/0	116.41	2.0789	-5.253	2948.7	4754.8	2.7361	0.0031089	0.99689	0.0062179	0.097544	FALSE
JAK1_1	JAK1	116.41/116.32/17.739	2.0789/53.89/0	116.32	2.0789	-5.2519	4859.4	4751.1	2.7356	0.0031138	0.99689	0.0062275	0.09757	FALSE
SNF8_11	SNF8	65.799/72.948/106.43	36.381/0.94544/0	72.948	0.94544	-5.2483	586.22	2979.5	2.732	0.0031474	0.99685	0.0062948	0.098121	FALSE
ARPC4_2	ARPC4	109.91/48.304/115.3	0/1.8909/164.54	109.91	1.8909	-5.2617	1912	4489	2.7307	0.0031602	0.99684	0.0063204	0.098393	FALSE
TMEM258_1	TMEM258	72.306/79.849/15.965	0/0/32.338	72.306	0	-6.1959	1615.6	2953.3	2.7276	0.0031897	0.99681	0.0063794	0.098934	FALSE
FNDC3B_9	FNDC3B	573.39/652.59/408.89	158/158.83/88.453	573.39	158	-1.853	16667	23420	2.7234	0.0032309	0.99677	0.0064618	0.099831	FALSE
hsa-mir-3670-1_1	hsa-mir-3670-1	47.722/75.906/102.89	1.0394/0/77.04	75.906	1.0394	-5.2368	761.15	3100.3	2.7204	0.00326	0.99674	0.00652	0.10049	FALSE
KIAA1033_6	KIAA1033	54.23/70.977/213.76	0/0/29.484	70.977	0	-6.1695	10333	2899	2.7184	0.0032796	0.99672	0.0065592	0.10049	FALSE
ARFRP1_8	ARFRP1	112.07/70.977/58.539	1.0394/0/0	70.977	0	-6.1695	921.86	2899	2.7184	0.0032796	0.99672	0.0065592	0.10049	FALSE
EIF2B4_12	EIF2B4	51.337/122.24/70.956	0/0/47.555	70.956	0	-6.1691	1507.3	2898.2	2.7183	0.003281	0.99672	0.0065621	0.10049	FALSE
DAP3_5	DAP3	0/85.764/70.956	0/66.181/0	70.956	0	-6.1691	2627	2898.2	2.7183	0.003281	0.99672	0.0065621	0.10049	FALSE
ZBTB17_14	ZBTB17	149.67/0/200.45	0/3.7818/78.942	149.67	3.7818	-4.9777	12490	6113.3	2.7137	0.0033271	0.99667	0.0066541	0.10177	FALSE
UBE2G2_4	UBE2G2	356.47/561.9/462.1	193.34/94.544/89.404	462.1	94.544	-2.2771	10559	18874	2.7116	0.0033484	0.99665	0.0066968	0.1023	FALSE
WDR33_3	WDR33	117.86/14.787/69.182	30.144/0/0	69.182	0	-6.133	2664.1	2825.7	2.7059	0.0034063	0.99659	0.0068126	0.10383	FALSE
NonTargeting_Human_0222	NonTargeting_Human_0222	73.752/5.9147/78.939	1.0394/0/67.529	73.752	1.0394	-5.1959	2314.4	3012.4	2.7058	0.0034072	0.99659	0.0068144	0.10383	FALSE
KMT2D_10	KMT2D	68.691/50.275/127.72	150.72/0.94544/0	68.691	0.94544	-5.1628	1911.9	2805.6	2.7024	0.0034421	0.99656	0.0068843	0.10464	FALSE
SSH3_7	SSH3	41.938/98.579/72.73	1.0394/74.69/0	72.73	1.0394	-5.176	808.17	2970.6	2.6987	0.00348	0.99652	0.0069601	0.10522	FALSE
PGS1_1	PGS1	93.998/68.019/47.009	39.499/0.94544/0	68.019	0.94544	-5.1488	558.17	2778.2	2.6976	0.0034919	0.99651	0.0069838	0.10522	FALSE
DPAGT1_5	DPAGT1	67.968/131.11/24.835	0/0/0	67.968	0	-6.1078	2923.7	2776.1	2.6972	0.0034957	0.9965	0.0069915	0.10522	FALSE
CPSF4_4	CPSF4	24.584/201.1/67.409	0/21.745/0	67.409	0	-6.0961	9853.8	2753.3	2.6932	0.003538	0.99646	0.0070759	0.10566	FALSE
CPSF2_7	CPSF2	112.8/58.161/67.409	42.617/0.94544/0	67.409	0.94544	-5.136	1072.8	2753.3	2.6932	0.003538	0.99646	0.0070759	0.10566	FALSE
WRB_13	WRB	67.245/0.98579/99.339	0/0/0	67.245	0	-6.0926	2710.1	2746.6	2.6921	0.0035505	0.99645	0.0071009	0.10566	FALSE
GTF2E1_7	GTF2E1	127.26/112.38/158.76	1.0394/2.8363/76.088	127.26	2.8363	-5.0632	607.01	5197.8	2.6912	0.0035597	0.99644	0.0071194	0.10566	FALSE
MED27_7	MED27	71.583/122.24/60.313	1.0394/0/128.4	71.583	1.0394	-5.1534	1346.5	2923.8	2.6908	0.0035643	0.99644	0.0071285	0.10566	FALSE
TAF7_2	TAF7	155.46/67.034/18.626	71.722/0/0	67.034	0	-6.0882	5081.1	2737.9	2.6906	0.0035666	0.99643	0.0071333	0.10566	FALSE
TBX1_15	TBX1	73.029/66.048/53.217	25.986/0.94544/0	66.048	0.94544	-5.107	106.68	2697.7	2.6834	0.0036436	0.99636	0.0072871	0.1071	FALSE
CCT6B_13	CCT6B	65.799/84.778/0	0/0/32.338	65.799	0	-6.0617	2344.8	2687.5	2.6816	0.0036633	0.99634	0.0073267	0.10742	FALSE
HIST2H3A_11	HIST2H3A	96.167/69.991/0	1.0394/0/27.582	69.991	1.0394	-5.1214	2792	2858.7	2.6796	0.0036856	0.99631	0.0073712	0.10774	FALSE
CDC23_12	CDC23	128.7/65.062/31.93	0/0/66.577	65.062	0	-6.0457	2574.1	2657.4	2.6762	0.0037227	0.99628	0.0074453	0.10831	FALSE
ATP5I_6	ATP5I	157.63/65.062/0	0/72.799/0	65.062	0	-6.0457	6400.7	2657.4	2.6762	0.0037227	0.99628	0.0074453	0.10831	FALSE
FDX1L_2	FDX1L	67.968/9.8579/64.748	11.434/0/0	64.748	0	-6.0389	1511.6	2644.6	2.6739	0.0037484	0.99625	0.0074968	0.10893	FALSE
NonTargeting_Human_0206	NonTargeting_Human_0206	64.352/90.692/61.2	0/0/106.52	64.352	0	-6.0302	351.87	2628.4	2.671	0.0037811	0.99622	0.0075621	0.10923	FALSE
UBE2L3_1	UBE2L3	64.352/186.31/0	0/61.454/0	64.352	0	-6.0302	9507.9	2628.4	2.671	0.0037811	0.99622	0.0075621	0.10923	FALSE
DHX36_12	DHX36	64.352/85.764/24.835	0/0/124.59	64.352	0	-6.0302	1010	2628.4	2.671	0.0037811	0.99622	0.0075621	0.10923	FALSE
CCT8_11	CCT8	58.568/64.076/84.261	20.789/0.94544/0	64.076	0.94544	-5.064	218.88	2617.1	2.669	0.0038041	0.9962	0.0076082	0.10976	FALSE
TMEM258_3	TMEM258	57.122/217.86/63.861	65.485/0/0	63.861	0	-6.0193	11880	2608.3	2.6674	0.0038222	0.99618	0.0076445	0.11002	FALSE
COMMD2_4	COMMD2	618.22/648.65/580.96	277.53/195.71/189.27	618.22	195.71	-1.6544	1157.3	25251	2.6632	0.00387	0.99613	0.0077401	0.11101	FALSE
POLR2C_3	POLR2C	67.245/152.8/103.77	2.0789/80.363/0	103.77	2.0789	-5.0887	1868.8	4238.6	2.662	0.0038836	0.99612	0.0077672	0.11127	FALSE
ZNF143_1	ZNF143	160.52/23.659/62.974	68.603/0.94544/0	62.974	0.94544	-5.0393	5530.4	2572.1	2.6608	0.003898	0.9961	0.0077961	0.11145	FALSE
TMEM87B_3	TMEM87B	62.906/128.15/0	0/69.963/0	62.906	0	-5.9979	4107.1	2569.4	2.6603	0.0039039	0.9961	0.0078078	0.11145	FALSE
WRB_4	WRB	86.767/0/62.087	0/0/17.12	62.087	0	-5.9793	2231.9	2535.9	2.6541	0.0039759	0.99602	0.0079518	0.11325	FALSE
GATS_3	GATS	61.46/69.991/3.5478	0/0/0	61.46	0	-5.9649	1713.3	2510.3	2.6494	0.0040322	0.99597	0.0080643	0.11431	FALSE
CENPA_5	CENPA	61.46/83.792/1.7739	0/0/0	61.46	0	-5.9649	2030.6	2510.3	2.6494	0.0040322	0.99597	0.0080643	0.11431	FALSE
RICTOR_7	RICTOR	103.4/0/61.2	0/0/19.022	61.2	0	-5.9588	2763	2499.7	2.6474	0.0040559	0.99594	0.0081117	0.11459	FALSE
NOP16_12	NOP16	119.31/34.503/61.2	0/34.036/0	61.2	0	-5.9588	2044.5	2499.7	2.6474	0.0040559	0.99594	0.0081117	0.11459	FALSE
UBE2G2_9	UBE2G2	95.444/69.005/182.71	81.077/1.8909/0	95.444	1.8909	-5.0601	4157.4	3898.3	2.6435	0.0041028	0.9959	0.0082055	0.11551	FALSE
GAPDH_6	GAPDH	72.306/43.375/60.313	0/0/0	60.313	0	-5.9381	215.37	2463.4	2.6406	0.004138	0.99586	0.008276	0.1161	FALSE
CCZ1_10	CCZ1	142.44/60.133/23.948	0/0/60.871	60.133	0	-5.9339	4042.1	2456.1	2.6392	0.004155	0.99585	0.0083099	0.11631	FALSE
C11orf57_15	C11orf57	0/133.08/63.861	1.0394/0/44.702	63.861	1.0394	-4.9911	4434.8	2608.3	2.635	0.0042071	0.99579	0.0084141	0.11741	FALSE
STXBP5L_8	STXBP5L	51.337/77.877/59.426	0/82.253/0	59.426	0	-5.9171	202.94	2427.2	2.6337	0.0042225	0.99578	0.0084449	0.11753	FALSE
DDX52_9	DDX52	59.291/31.545/82.487	6.2367/0/0	59.291	0	-5.9139	653.94	2421.7	2.6327	0.0042355	0.99576	0.0084711	0.11757	FALSE
TFRC_9	TFRC	383.22/870.45/353.01	55.091/150.33/63.724	383.22	63.724	-2.5696	119150	15652	2.6325	0.0042379	0.99576	0.0084758	0.11757	FALSE
CDC73_1	CDC73	52.783/59.147/70.956	0/0/200.68	59.147	0	-5.9104	89.977	2415.8	2.6316	0.0042495	0.99575	0.008499	0.11759	FALSE
UBE2Q1_15	UBE2Q1	58.568/49.289/131.27	0/0/49.458	58.568	0	-5.8965	2685.8	2392.2	2.6271	0.0043064	0.99569	0.0086128	0.11816	FALSE
CCT6A_5	CCT6A	57.845/133.08/23.948	47.815/0/0	57.845	0	-5.8788	3404.8	2362.6	2.6214	0.004379	0.99562	0.0087579	0.11956	FALSE
RAB7A_13	RAB7A	177.15/57.176/40.8	0/71.854/0	57.176	0	-5.8623	7331	2335.3	2.6161	0.0044476	0.99555	0.0088952	0.12044	FALSE
ANKRD36_14	ANKRD36	23.861/57.176/76.278	128.89/0.94544/0	57.176	0.94544	-4.9022	737.39	2335.3	2.6161	0.0044476	0.99555	0.0088952	0.12044	FALSE
EIF3F_13	EIF3F	0/57.176/70.956	0/0/21.875	57.176	0	-5.8623	1729.5	2335.3	2.6161	0.0044476	0.99555	0.0088952	0.12044	FALSE
USP39_10	USP39	57.122/0/80.713	0/0/0	57.122	0	-5.861	1909.7	2333.1	2.6156	0.0044532	0.99555	0.0089064	0.12044	FALSE
MRPL42_6	MRPL42	25.307/92.664/56.765	0/46.327/0	56.765	0	-5.8521	1139.2	2318.5	2.6128	0.0044904	0.99551	0.0089809	0.12098	FALSE
HTRA2_13	HTRA2	143.17/280.95/184.49	8.3156/0/43.751	184.49	8.3156	-4.3155	5506.2	7535.2	2.6122	0.0044983	0.9955	0.0089966	0.12104	FALSE
DAP3_7	DAP3	116.41/56.19/0	0/0/0	56.19	0	-5.8377	3392	2295	2.6082	0.0045514	0.99545	0.0091029	0.12183	FALSE
SSX2_12	SSX2	88.936/56.19/28.383	0/17.963/0	56.19	0	-5.8377	922.79	2295	2.6082	0.0045514	0.99545	0.0091029	0.12183	FALSE
CCDC53_15	CCDC53	55.676/85.764/0	0/81.308/0	55.676	0	-5.8247	2002.5	2274	2.604	0.004607	0.99539	0.0092139	0.12304	FALSE
GPN1_5	GPN1	55.676/0/127.72	12.473/0/0	55.676	0	-5.8247	4145.2	2274	2.604	0.004607	0.99539	0.0092139	0.12304	FALSE
EIF3C_9	EIF3C	53.506/55.204/94.904	0/62.399/0	55.204	0	-5.8126	789.49	2254.8	2.6002	0.0046587	0.99534	0.0093174	0.12368	FALSE
ZFAND1_11	ZFAND1	127.98/55.204/15.078	0/0/48.506	55.204	0	-5.8126	3453.3	2254.8	2.6002	0.0046587	0.99534	0.0093174	0.12368	FALSE
KDM8_6	KDM8	678.95/774.83/357.44	246.35/187.2/480.31	678.95	246.35	-1.4589	56281	27731	2.5995	0.0046684	0.99533	0.0093369	0.12368	FALSE
GNB2L1_3	GNB2L1	57.845/0/54.991	0/32.145/0	54.991	0	-5.8071	1516.1	2246.1	2.5984	0.0046823	0.99532	0.0093646	0.12383	FALSE
ACO2_1	ACO2	346.35/300.67/398.24	50.933/0.94544/164.54	346.35	50.933	-2.7417	2390	14146	2.5962	0.004713	0.99529	0.009426	0.12437	FALSE
SAP130_6	SAP130	382.5/387.41/148.12	55.091/419.78/67.529	382.5	67.529	-2.4844	27479	15623	2.5922	0.0047682	0.99523	0.0095363	0.12499	FALSE
NLRP8_1	NLRP8	54.23/80.835/40.8	59.248/0/0	54.23	0	-5.7874	444.09	2215	2.5922	0.0047682	0.99523	0.0095364	0.12499	FALSE
TRAPPC1_7	TRAPPC1	54.23/83.792/0	0/0/155.98	54.23	0	-5.7874	1907.4	2215	2.5922	0.0047682	0.99523	0.0095364	0.12499	FALSE
POLR1B_1	POLR1B	31.092/54.218/79.826	0/0.94544/32.338	54.218	0.94544	-4.827	595.3	2214.5	2.5921	0.0047695	0.99523	0.009539	0.12499	FALSE
VPS29_15	VPS29	303.69/195.19/234.16	16.631/0/136.01	234.16	16.631	-3.7374	3176.5	9563.9	2.5914	0.0047794	0.99522	0.0095588	0.12499	FALSE
ARPC4_4	ARPC4	20.246/179.41/54.104	83.156/0/0	54.104	0	-5.7841	8424.4	2209.8	2.5912	0.0047826	0.99522	0.0095651	0.12499	FALSE
POLR3C_5	POLR3C	37.599/98.579/54.104	44.696/0/0	54.104	0	-5.7841	1125.2	2209.8	2.5912	0.0047826	0.99522	0.0095651	0.12499	FALSE
INTS2_6	INTS2	53.506/0/183.6	101.87/0/0	53.506	0	-5.7684	9893.6	2185.4	2.5862	0.0048518	0.99515	0.0097036	0.12599	FALSE
UBA3_4	UBA3	53.506/0/98.452	0/0/43.751	53.506	0	-5.7684	2441.5	2185.4	2.5862	0.0048518	0.99515	0.0097036	0.12599	FALSE
ZNF764_8	ZNF764	608.82/341.08/543.7	278.57/159.78/120.79	543.7	159.78	-1.7604	22647	22207	2.5855	0.0048618	0.99514	0.0097236	0.12599	FALSE
HYOU1_13	HYOU1	36.876/81.82/53.217	0/0/0	53.217	0	-5.7607	542.59	2173.6	2.5838	0.0048858	0.99511	0.0097716	0.12599	FALSE
PTPMT1_11	PTPMT1	237.89/0/301.56	121.62/17.963/15.218	237.89	17.963	-3.655	30323	9716.3	2.5777	0.0049729	0.99503	0.0099457	0.12751	FALSE
TAF1_7	TAF1	78.814/0/52.33	0/0/0	52.33	0	-5.7369	1719.9	2137.4	2.5764	0.0049923	0.99501	0.0099845	0.12787	FALSE
UBA3_13	UBA3	33.261/52.247/57.652	124.73/0/0	52.247	0	-5.7346	194.84	2134	2.5757	0.0050024	0.995	0.010005	0.128	FALSE
hsa-mir-6817_2	hsa-mir-6817	367.31/582.6/311.32	42.617/62.399/377.59	367.31	62.399	-2.5384	24742	15003	2.5724	0.0050497	0.99495	0.010099	0.1288	FALSE
ERCC3_15	ERCC3	51.337/58.161/18.626	0/0/0	51.337	0	-5.7098	558.3	2096.8	2.5679	0.0051153	0.99488	0.010231	0.12981	FALSE
MRP63_11	MRP63	104.12/122.24/111.76	3.1183/141.82/0	111.76	3.1183	-4.775	84.081	4564.6	2.5676	0.005121	0.99488	0.010242	0.12981	FALSE
COG5_1	COG5	41.214/51.261/79.826	109.14/0.94544/0	51.261	0.94544	-4.7476	458.44	2093.7	2.5673	0.005125	0.99488	0.01025	0.12981	FALSE
CDIPT_3	CDIPT	29.645/159.7/207.55	73.801/3.7818/6.6577	159.7	6.6577	-4.3913	9601.6	6522.7	2.5639	0.005175	0.99483	0.01035	0.1307	FALSE
FNDC3B_13	FNDC3B	187.27/300.67/329.06	0/110.62/36.142	300.67	36.142	-3.0218	6832.1	12280	2.5637	0.0051778	0.99482	0.010356	0.1307	FALSE
DPAGT1_9	DPAGT1	183.66/22.673/50.556	2.0789/0/0	50.556	0	-5.6881	9246.7	2064.9	2.5612	0.0052152	0.99478	0.01043	0.13138	FALSE
NonTargeting_Human_0939	NonTargeting_Human_0939	67.968/50.275/37.252	0/23.636/0	50.275	0	-5.6802	241.31	2053.5	2.5588	0.0052518	0.99475	0.010504	0.13216	FALSE
YPEL1_2	YPEL1	0/81.82/133.04	44.696/1.8909/0	81.82	1.8909	-4.8404	4659.2	3341.9	2.5542	0.0053222	0.99468	0.010644	0.13366	FALSE
NCBP1_4	NCBP1	83.152/37.46/49.669	0/0/40.898	49.669	0	-5.663	635.08	2028.7	2.5535	0.005332	0.99467	0.010664	0.13377	FALSE
GOLGA6A_3	GOLGA6A	0/49.289/172.07	0/35.927/0	49.289	0	-5.6522	8752.2	2013.2	2.5502	0.0053832	0.99462	0.010766	0.13464	FALSE
HYOU1_11	HYOU1	49.168/6.9005/83.374	0/0/0	49.168	0	-5.6487	1478.3	2008.2	2.5491	0.0053997	0.9946	0.010799	0.13477	FALSE
TMEM199_1	TMEM199	32.538/141.95/48.783	0/0/86.551	48.783	0	-5.6376	4472.4	1992.5	2.5457	0.0054526	0.99455	0.010905	0.13554	FALSE
CCDC43_1	CCDC43	33.984/135.05/48.783	47.815/0.94544/0	48.783	0.94544	-4.6775	3830.8	1992.5	2.5457	0.0054526	0.99455	0.010905	0.13554	FALSE
IRS1_10	IRS1	52.06/30.559/48.783	42.617/0/0	48.783	0	-5.6376	171.41	1992.5	2.5457	0.0054526	0.99455	0.010905	0.13554	FALSE
SMC1A_5	SMC1A	36.876/113.37/48.783	50.933/0/0	48.783	0	-5.6376	2156.4	1992.5	2.5457	0.0054526	0.99455	0.010905	0.13554	FALSE
INTS1_6	INTS1	110.63/80.835/67.409	40.538/0.94544/1.9022	80.835	1.9022	-4.8175	533.96	3301.6	2.5452	0.0054603	0.99454	0.010921	0.13559	FALSE
GAPDH_5	GAPDH	80.983/48.304/37.252	24.947/0/0	48.304	0	-5.6236	595.03	1972.9	2.5415	0.0055194	0.99448	0.011039	0.13664	FALSE
HNRNPU_12	HNRNPU	142.44/87.735/107.32	3.1183/0/28.533	107.32	3.1183	-4.7171	808.57	4383.5	2.5403	0.0055373	0.99446	0.011075	0.13695	FALSE
ZBTB10_7	ZBTB10	109.91/275.03/395.58	522.84/26.472/29.484	275.03	29.484	-3.1787	20900	11234	2.5393	0.0055543	0.99445	0.011109	0.13723	FALSE
ARFRP1_6	ARFRP1	47.722/99.565/0	40.538/0/0	47.722	0	-5.6065	2482.5	1949.2	2.5363	0.005602	0.9944	0.011204	0.13813	FALSE
PPP1CB_4	PPP1CB	47.722/170.54/23.061	0/0/69.431	47.722	0	-5.6065	7846.4	1949.2	2.5363	0.005602	0.9944	0.011204	0.13813	FALSE
ALG14_14	ALG14	154.01/72.948/196.02	3.1183/49.163/6.6577	154.01	6.6577	-4.3393	4167.9	6290.5	2.5326	0.0056613	0.99434	0.011323	0.13945	FALSE
NCBP1_12	NCBP1	31.092/64.076/47.009	57.17/0/0	47.009	0	-5.5852	272.33	1920	2.5298	0.0057059	0.99429	0.011412	0.13998	FALSE
RPL23A_11	RPL23A	90.383/0/47.009	2.0789/0.94544/0	47.009	0.94544	-4.6251	2045.6	1920	2.5298	0.0057059	0.99429	0.011412	0.13998	FALSE
CCT8_1	CCT8	38.322/79.849/47.009	13.513/0/0	47.009	0	-5.5852	576.97	1920	2.5298	0.0057059	0.99429	0.011412	0.13998	FALSE
GPN2_2	GPN2	0/78.863/47.009	0/0/0	47.009	0	-5.5852	1612.3	1920	2.5298	0.0057059	0.99429	0.011412	0.13998	FALSE
SRCAP_15	SRCAP	274.76/191.24/48.783	11.434/91.708/0	191.24	11.434	-3.9506	13635	7811.2	2.524	0.0058021	0.9942	0.011604	0.14167	FALSE
TPI1_5	TPI1	32.538/46.332/49.669	0/0/89.404	46.332	0	-5.5647	100.71	1892.4	2.5237	0.005807	0.99419	0.011614	0.14167	FALSE
CPSF3L_10	CPSF3L	56.399/46.332/45.235	1.0394/0.94544/0	46.332	0.94544	-4.6046	51.271	1892.4	2.5237	0.005807	0.99419	0.011614	0.14167	FALSE
CMTR1_15	CMTR1	150.4/46.332/38.139	0/40.654/0	46.332	0	-5.5647	5448.3	1892.4	2.5237	0.005807	0.99419	0.011614	0.14167	FALSE
VPS13C_13	VPS13C	46.276/25.63/49.669	0/60.508/0	46.276	0	-5.563	218.87	1890.1	2.5231	0.0058155	0.99418	0.011631	0.14167	FALSE
RAB28_3	RAB28	46.276/22.673/73.617	0/0/0	46.276	0	-5.563	652.32	1890.1	2.5231	0.0058155	0.99418	0.011631	0.14167	FALSE
PRR20A_2	PRR20A	59.291/0/46.122	0/0/0	46.122	0	-5.5583	1150.3	1883.8	2.5217	0.005839	0.99416	0.011678	0.1421	FALSE
RBM14_5	RBM14	576.28/41.403/488.71	93.55/135.2/492.67	488.71	135.2	-1.8462	103880	19961	2.5179	0.0059026	0.9941	0.011805	0.14351	FALSE
RPL13A_13	RPL13A	45.553/59.147/0	0/0/0	45.553	0	-5.5408	1129.9	1860.6	2.5165	0.0059267	0.99407	0.011853	0.14352	FALSE
TAF2_3	TAF2	45.553/186.31/30.156	49.893/0/0	45.553	0	-5.5408	10025	1860.6	2.5165	0.0059267	0.99407	0.011853	0.14352	FALSE
PTPMT1_9	PTPMT1	377.44/224.76/258.1	25.986/4.7272/62.773	258.1	25.986	-3.2632	7676.2	10542	2.515	0.0059523	0.99405	0.011905	0.144	FALSE
PES1_2	PES1	74.475/45.346/0	0/0/21.875	45.346	0	-5.5344	1452.4	1852.1	2.5146	0.0059591	0.99404	0.011918	0.14402	FALSE
ALG14_5	ALG14	92.552/41.403/45.235	63.406/0/0	45.235	0	-5.5309	1126.8	1847.6	2.5135	0.0059766	0.99402	0.011953	0.14421	FALSE
VPS35_5	VPS35	749.81/364.74/961.46	306.64/437.74/310.06	749.81	310.06	-1.2713	96537	30626	2.5134	0.0059789	0.99402	0.011958	0.14421	FALSE
WDR82_10	WDR82	308.02/442.62/99.339	42.617/30.254/99.866	308.02	42.617	-2.8247	30833	12581	2.5128	0.0059888	0.99401	0.011978	0.14431	FALSE
EFCAB5_6	EFCAB5	44.83/105.48/0	30.144/0/0	44.83	0	-5.5182	2844	1831	2.5097	0.0060411	0.99396	0.012082	0.145	FALSE
DHX36_3	DHX36	44.83/90.692/0	41.578/0/0	44.83	0	-5.5182	2056.5	1831	2.5097	0.0060411	0.99396	0.012082	0.145	FALSE
NDUFB10_1	NDUFB10	44.83/0/86.922	0/0/82.746	44.83	0	-5.5182	1890.7	1831	2.5097	0.0060411	0.99396	0.012082	0.145	FALSE
DNAJC17_4	DNAJC17	129.43/30.559/79.826	2.0789/0/162.64	79.826	2.0789	-4.7143	2443.8	3260.4	2.5062	0.0061014	0.9939	0.012203	0.14587	FALSE
GOLGA6A_13	GOLGA6A	29.645/44.36/48.783	0/0/0	44.36	0	-5.5034	118.04	1811.9	2.5053	0.0061171	0.99388	0.012234	0.14587	FALSE
RBBP5_15	RBBP5	99.059/44.36/0.88695	70.682/0.94544/0	44.36	0.94544	-4.5433	2441	1811.9	2.5053	0.0061171	0.99388	0.012234	0.14587	FALSE
CHMP1A_10	CHMP1A	28.922/44.36/112.64	22.868/0/0	44.36	0	-5.5034	2450.4	1811.9	2.5053	0.0061171	0.99388	0.012234	0.14587	FALSE
INTS8_2	INTS8	16.63/54.218/44.348	0/0/0	44.348	0	-5.503	432.84	1811.4	2.5052	0.0061191	0.99388	0.012238	0.14587	FALSE
GNB1L_11	GNB1L	526.39/697.94/613.77	159.04/299.71/217.8	613.77	217.8	-1.4904	7359.9	25069	2.5039	0.0061417	0.99386	0.012283	0.14598	FALSE
ATP6V0D1_13	ATP6V0D1	0/122.24/43.461	0/0/116.03	43.461	0	-5.4745	4047.3	1775.1	2.4968	0.0062667	0.99373	0.012533	0.14823	FALSE
ZBTB8OS_7	ZBTB8OS	184.38/229.69/342.36	41.578/19.854/0	229.69	19.854	-3.4675	7374.3	9381.5	2.4929	0.0063355	0.99366	0.012671	0.14971	FALSE
GIGYF2_14	GIGYF2	352.13/509.65/292.7	63.406/53.89/244.43	352.13	63.406	-2.4549	14173	14383	2.4904	0.0063804	0.99362	0.012761	0.15048	FALSE
UBE2G2_6	UBE2G2	353.58/864.54/814.22	177.75/446.25/360.47	814.22	360.47	-1.1733	107360	33256	2.4884	0.0064157	0.99358	0.012831	0.15109	FALSE
GTF3C4_7	GTF3C4	135.94/106.47/155.22	109.14/0.94544/5.7066	135.94	5.7066	-4.3518	620.14	5552.2	2.4881	0.0064219	0.99358	0.012844	0.15109	FALSE
SPDYE2_7	SPDYE2	107.01/71.963/29.27	0/1.8909/16.169	71.963	1.8909	-4.6576	1525.6	2939.3	2.4838	0.0064995	0.9935	0.012999	0.1524	FALSE
SNF8_13	SNF8	41.938/31.545/71.843	0/90.762/0	41.938	0	-5.4242	501.18	1712.9	2.482	0.0065328	0.99347	0.013066	0.15289	FALSE
NonTargeting_Human_0921	NonTargeting_Human_0921	52.06/0/41.687	0/0/27.582	41.687	0	-5.4157	922.7	1702.7	2.4795	0.0065781	0.99342	0.013156	0.15293	FALSE
INTS2_9	INTS2	49.168/0/41.687	17.671/0/0	41.687	0	-5.4157	896.88	1702.7	2.4795	0.0065781	0.99342	0.013156	0.15293	FALSE
GPN1_1	GPN1	0/79.849/41.687	23.907/0/0	41.687	0	-5.4157	1597.1	1702.7	2.4795	0.0065781	0.99342	0.013156	0.15293	FALSE
CTDP1_11	CTDP1	65.075/4.9289/41.687	0/0/94.159	41.687	0	-5.4157	949.09	1702.7	2.4795	0.0065781	0.99342	0.013156	0.15293	FALSE
TAF2_2	TAF2	0/80.835/41.687	0/0/53.262	41.687	0	-5.4157	1635.2	1702.7	2.4795	0.0065781	0.99342	0.013156	0.15293	FALSE
PFDN6_9	PFDN6	123.64/41.403/13.304	1.0394/0/0.95111	41.403	0.95111	-4.4418	3776.5	1691.1	2.4745	0.0066703	0.99333	0.013341	0.15477	FALSE
DET1_2	DET1	240.06/376.57/362.76	12.473/166.4/70.382	362.76	70.382	-2.3494	7624	14817	2.4718	0.0067222	0.99328	0.013444	0.15553	FALSE
PLA2G10_8	PLA2G10	40.491/39.432/67.409	6.2367/0/0	40.491	0	-5.3747	362.83	1653.8	2.4676	0.0068013	0.9932	0.013603	0.15662	FALSE
KMT2D_7	KMT2D	40.491/59.147/14.191	0/79.417/0	40.491	0	-5.3747	519.87	1653.8	2.4676	0.0068013	0.9932	0.013603	0.15662	FALSE
SPATA5_14	SPATA5	23.861/40.417/250.12	0/0/19.022	40.417	0	-5.3722	22125	1650.8	2.4668	0.0068155	0.99318	0.013631	0.1568	FALSE
NHLRC2_9	NHLRC2	73.752/233.63/20.4	2.0789/0/4.7555	73.752	2.0789	-4.6016	14204	3012.4	2.4624	0.0069009	0.9931	0.013802	0.15757	FALSE
MRPS21_15	MRPS21	43.384/20.702/241.25	1.0394/119.13/0	43.384	1.0394	-4.4438	19833	1772	2.4618	0.006912	0.99309	0.013824	0.15757	FALSE
ALG8_8	ALG8	60.014/0/39.913	0/159.78/0	39.913	0	-5.3545	998.55	1630.2	2.4617	0.0069134	0.99309	0.013827	0.15757	FALSE
DHX36_5	DHX36	103.4/0/39.913	0/0/81.795	39.913	0	-5.3545	2811.7	1630.2	2.4617	0.0069134	0.99309	0.013827	0.15757	FALSE
ZFR_14	ZFR	31.092/84.778/39.913	0/0/43.751	39.913	0	-5.3545	1045.3	1630.2	2.4617	0.0069134	0.99309	0.013827	0.15757	FALSE
SMARCB1_12	SMARCB1	73.029/23.659/39.913	72.761/0/0	39.913	0	-5.3545	680.44	1630.2	2.4617	0.0069134	0.99309	0.013827	0.15757	FALSE
AKAP9_1	AKAP9	0/186.31/39.913	0/127.63/0	39.913	0	-5.3545	11513	1630.2	2.4617	0.0069134	0.99309	0.013827	0.15757	FALSE
CDC23_7	CDC23	39.768/64.076/0.88695	0/0/0	39.768	0	-5.3494	1051.3	1624.3	2.4603	0.0069419	0.99306	0.013884	0.15763	FALSE
EIF6_14	EIF6	39.768/100.55/37.252	42.617/0/0	39.768	0	-5.3494	1850.4	1624.3	2.4603	0.0069419	0.99306	0.013884	0.15763	FALSE
CHAF1B_10	CHAF1B	39.768/70.977/23.948	0/0/16.169	39.768	0	-5.3494	612.13	1624.3	2.4603	0.0069419	0.99306	0.013884	0.15763	FALSE
CDC73_14	CDC73	15.907/39.432/82.487	71.722/0/0	39.432	0	-5.3374	1203.6	1610.6	2.4568	0.0070089	0.99299	0.014018	0.15885	FALSE
SRP14_6	SRP14	119.31/477.12/351.23	66.525/69.963/42.8	351.23	66.525	-2.383	34819	14346	2.4544	0.0070563	0.99294	0.014113	0.15963	FALSE
GAPDH_14	GAPDH	46.999/0/42.574	1.0394/29.309/0	42.574	1.0394	-4.4172	916.06	1738.9	2.4539	0.0070659	0.99293	0.014132	0.1597	FALSE
MED27_5	MED27	70.86/0/39.026	0/0/53.262	39.026	0	-5.3229	1268.2	1594	2.4526	0.0070908	0.99291	0.014182	0.1599	FALSE
PSMD9_8	PSMD9	133.04/446.56/370.75	1.0394/76.581/142.67	370.75	76.581	-2.2605	31126	15143	2.4508	0.0071278	0.99287	0.014256	0.16036	FALSE
FAM134C_8	FAM134C	115.69/0/38.139	0/0/0	38.139	0	-5.2905	3734.3	1557.8	2.4434	0.0072753	0.99272	0.014551	0.16288	FALSE
TCERG1_11	TCERG1	27.476/76.891/38.139	0/0/192.12	38.139	0	-5.2905	807.72	1557.8	2.4434	0.0072753	0.99272	0.014551	0.16288	FALSE
GAGE12B_1	GAGE12B	76.644/70.977/53.217	2.0789/0.94544/62.773	70.977	2.0789	-4.547	173.76	2899	2.4416	0.0073113	0.99269	0.014623	0.16343	FALSE
FNDC3B_1	FNDC3B	229.21/252.36/400.02	24.947/229.74/28.533	252.36	28.533	-3.1008	11169	10308	2.4411	0.0073218	0.99268	0.014644	0.16352	FALSE
G6PC_13	G6PC	37.599/111.39/0	75.88/0/0	37.599	0	-5.2705	3429.7	1535.7	2.4377	0.0073912	0.99261	0.014782	0.16447	FALSE
POLR3H_15	POLR3H	47.722/0/37.252	0/0/72.284	37.252	0	-5.2575	748.67	1521.5	2.434	0.0074672	0.99253	0.014934	0.16578	FALSE
TMEM199_14	TMEM199	174.98/283.91/184.49	99.787/13.236/9.5111	184.49	13.236	-3.7037	4987.4	7535.2	2.4273	0.0076052	0.99239	0.01521	0.1677	FALSE
FNDC3B_12	FNDC3B	467.82/392.34/445.25	88.353/121.02/150.27	445.25	121.02	-1.8708	1654.3	18186	2.4264	0.0076246	0.99238	0.015249	0.16783	FALSE
SUMO2_12	SUMO2	39.768/0/36.365	0/0/0	36.365	0	-5.2236	667	1485.3	2.4244	0.0076671	0.99233	0.015334	0.1683	FALSE
TAOK1_9	TAOK1	0/129.14/36.365	90.432/0/0	36.365	0	-5.2236	4964.6	1485.3	2.4244	0.0076671	0.99233	0.015334	0.1683	FALSE
TOMM22_12	TOMM22	148.23/64.076/23.948	145.52/1.8909/0	64.076	1.8909	-4.4925	4345.9	2617.1	2.423	0.007696	0.9923	0.015392	0.16863	FALSE
OSTC_3	OSTC	156.9/229.69/194.24	71.722/0.94544/15.218	194.24	15.218	-3.5896	1325.3	7933.7	2.4213	0.0077326	0.99227	0.015465	0.16926	FALSE
NCBP2_9	NCBP2	74.475/0/68.296	2.0789/0.94544/58.969	68.296	2.0789	-4.4923	2351.2	2789.5	2.421	0.0077386	0.99226	0.015477	0.16926	FALSE
INTS1_10	INTS1	73.029/0/39.026	1.0394/58.617/0	39.026	1.0394	-4.2947	1339.6	1594	2.4179	0.0078047	0.9922	0.015609	0.17038	FALSE
GNB2L1_1	GNB2L1	0/47.318/35.478	0/0/16.169	35.478	0	-5.189	699.44	1449.1	2.4146	0.0078753	0.99212	0.015751	0.17143	FALSE
HNRNPU_14	HNRNPU	35.43/85.764/0	0/23.636/0	35.43	0	-5.1871	1894.4	1447.1	2.4141	0.0078869	0.99211	0.015774	0.17143	FALSE
SETD1A_3	SETD1A	35.43/148.85/15.078	38.46/0/0	35.43	0	-5.1871	6639.6	1447.1	2.4141	0.0078869	0.99211	0.015774	0.17143	FALSE
WBSCR16_12	WBSCR16	236.44/0/222.63	21.828/154.11/0	222.63	21.828	-3.2922	24877	9093	2.413	0.00791	0.99209	0.01582	0.17178	FALSE
CAB39_5	CAB39	0/38.446/56.765	1.0394/0.94544/112.23	38.446	1.0394	-4.2736	906.84	1570.3	2.4118	0.0079366	0.99206	0.015873	0.17221	FALSE
RPL13A_7	RPL13A	34.707/60.133/3.5478	0/103.05/0	34.707	0	-5.1581	808.69	1417.6	2.406	0.0080638	0.99194	0.016128	0.17413	FALSE
WRB_2	WRB	174.26/132.1/39.026	78.998/0/6.6577	132.1	6.6577	-4.1194	5219.8	5395.3	2.4055	0.0080752	0.99192	0.01615	0.17413	FALSE
GINS2_8	GINS2	28.199/76.891/34.591	46.775/0/0	34.591	0	-5.1534	915.08	1412.9	2.4047	0.0080926	0.99191	0.016185	0.17435	FALSE
MORC3_14	MORC3	21.692/34.503/63.861	0/0/0	34.503	0	-5.1499	513.01	1409.2	2.4037	0.0081149	0.99189	0.01623	0.17452	FALSE
NonTargeting_Human_0262	NonTargeting_Human_0262	270.42/504.72/494.03	154.88/117.23/422.29	494.03	154.88	-1.6671	25058	20178	2.3986	0.0082295	0.99177	0.016459	0.17606	FALSE
SRP19_8	SRP19	33.984/48.304/17.739	0/0/0	33.984	0	-5.1286	234.47	1388	2.3978	0.0082469	0.99175	0.016494	0.17628	FALSE
INTS6_15	INTS6	43.384/0/33.704	0/0/0	33.704	0	-5.117	614.83	1376.6	2.3946	0.0083195	0.99168	0.016639	0.17705	FALSE
TPI1_8	TPI1	83.875/33.517/25.722	4.1578/0/0	33.517	0	-5.1092	1298.4	1369	2.3924	0.0083687	0.99163	0.016737	0.17764	FALSE
TMEM67_10	TMEM67	63.629/33.517/1.7739	32.223/0.94544/0	33.517	0.94544	-4.1491	957.19	1369	2.3924	0.0083687	0.99163	0.016737	0.17764	FALSE
ROR1_12	ROR1	171.37/108.44/86.035	0/4.7272/101.77	108.44	4.7272	-4.2561	2230.9	4429	2.3914	0.0083922	0.99161	0.016784	0.17787	FALSE
POLR2L_11	POLR2L	95.444/0/122.4	35.341/3.7818/2.8533	95.444	3.7818	-4.3341	4918.1	3898.3	2.3912	0.008396	0.9916	0.016792	0.17787	FALSE
GSK3B_7	GSK3B	52.06/36.474/0	1.0394/0.94544/40.898	36.474	1.0394	-4.1996	786.65	1489.8	2.3906	0.0084114	0.99159	0.016823	0.17787	FALSE
RAB7A_3	RAB7A	406.36/356.86/209.32	75.88/88.872/30.435	356.86	75.88	-2.2187	12108	14575	2.3898	0.008428	0.99157	0.016856	0.17787	FALSE
ATP5O_7	ATP5O	33.261/0/63.861	0/0/161.69	33.261	0	-5.0985	1021.3	1358.5	2.3895	0.0084367	0.99156	0.016873	0.17787	FALSE
AIM1_4	AIM1	132.32/278.98/247.46	30.144/38.763/21.875	247.46	30.144	-2.996	7125.3	10107	2.3883	0.0084641	0.99154	0.016928	0.17799	FALSE
DNLZ_4	DNLZ	373.82/299.68/143.69	87.313/44.436/49.458	299.68	49.458	-2.5751	14915	12240	2.3863	0.0085101	0.99149	0.01702	0.17862	FALSE
SLC38A5_13	SLC38A5	88.213/0.98579/63.861	2.0789/0/56.115	63.861	2.0789	-4.3969	2273.2	2608.3	2.3858	0.0085208	0.99148	0.017042	0.17867	FALSE
FNDC3B_14	FNDC3B	451.91/139.98/401.79	118.5/47.272/100.82	401.79	100.82	-1.984	35528	16411	2.3844	0.0085533	0.99145	0.017107	0.17867	FALSE
MARS2_14	MARS2	163.41/0/32.817	0/0/0	32.817	0	-5.0797	9065.9	1340.4	2.3843	0.0085566	0.99144	0.017113	0.17867	FALSE
DPY30_15	DPY30	0/213.92/32.817	91.471/0/0	32.817	0	-5.0797	16937	1340.4	2.3843	0.0085566	0.99144	0.017113	0.17867	FALSE
B4GALT2_10	B4GALT2	140.27/227.72/224.4	1.0394/61.454/23.778	224.4	23.778	-3.1854	3544.1	9165.4	2.3823	0.0086016	0.9914	0.017203	0.1793	FALSE
HSPE1_13	HSPE1	32.538/107.45/0	0/37.818/0	32.538	0	-5.0677	3335.3	1329	2.381	0.0086336	0.99137	0.017267	0.1794	FALSE
RPS14_11	RPS14	63.629/32.531/14.191	34.302/0.94544/0	32.531	0.94544	-4.1073	651.73	1328.7	2.3809	0.0086354	0.99136	0.017271	0.1794	FALSE
TMEM87B_5	TMEM87B	33.984/32.531/0	59.248/0/0	32.531	0	-5.0674	530.19	1328.7	2.3809	0.0086354	0.99136	0.017271	0.1794	FALSE
AGPAT6_6	AGPAT6	36.876/521.48/598.69	175.67/23.636/281.53	521.48	175.67	-1.5644	120400	21300	2.3768	0.008731	0.99127	0.017462	0.18061	FALSE
SPATA5_8	SPATA5	0/132.1/31.93	16.631/0/0	31.93	0	-5.0413	5526.3	1304.2	2.3737	0.0088047	0.9912	0.017609	0.18183	FALSE
SRP19_9	SRP19	31.815/51.261/0	0/0/0	31.815	0	-5.0363	695.17	1299.4	2.3723	0.0088379	0.99116	0.017676	0.18221	FALSE
WBSCR16_11	WBSCR16	199.56/0/187.15	15.592/34.036/0	187.15	15.592	-3.5033	17589	7643.9	2.3716	0.0088565	0.99114	0.017713	0.18244	FALSE
DNAJC17_9	DNAJC17	31.092/0/140.14	0/0/39.946	31.092	0	-5.0041	6429	1269.9	2.3636	0.00905	0.99095	0.0181	0.18562	FALSE
FAM57B_3	FAM57B	317.42/220.82/151.67	158/0/23.778	220.82	23.778	-3.1623	7057.1	9019.1	2.363	0.0090626	0.99094	0.018125	0.18562	FALSE
CLEC12B_3	CLEC12B	92.552/11.829/31.043	0/0/0	31.043	0	-5.002	2076.2	1267.9	2.363	0.0090645	0.99094	0.018129	0.18562	FALSE
CCDC178_1	CCDC178	38.322/119.28/114.42	100.83/5.6727/0	114.42	5.6727	-4.1125	2907	4673.3	2.3585	0.0091734	0.99083	0.018347	0.18746	FALSE
SRP9_8	SRP9	224.87/82.806/103.77	1.0394/67.126/4.7555	103.77	4.7555	-4.1862	7552.2	4238.6	2.3584	0.0091771	0.99082	0.018354	0.18746	FALSE
VPS35_9	VPS35	268.98/366.71/188.92	39.499/34.036/63.724	268.98	39.499	-2.7369	7980.6	10986	2.3578	0.0091914	0.99081	0.018383	0.18759	FALSE
GNB2L1_4	GNB2L1	335.5/328.27/402.68	21.828/352.65/68.48	335.5	68.48	-2.2759	2282.5	13703	2.3569	0.0092139	0.99079	0.018428	0.18762	FALSE
GPN2_14	GPN2	0/99.565/30.156	4.1578/0/0	30.156	0	-4.9615	2863.4	1231.7	2.352	0.0093369	0.99066	0.018674	0.18946	FALSE
RCC1_7	RCC1	0/69.005/30.156	0/0/20.924	30.156	0	-4.9615	1209.3	1231.7	2.352	0.0093369	0.99066	0.018674	0.18946	FALSE
GFER_7	GFER	362.25/436.7/125.06	69.643/83.199/237.78	362.25	83.199	-2.1091	30902	14796	2.3473	0.0094552	0.99054	0.01891	0.19117	FALSE
SDHAF1_12	SDHAF1	463.48/560.91/305.11	301.44/86.035/142.67	463.48	142.67	-1.6929	17287	18931	2.3462	0.0094839	0.99052	0.018968	0.19117	FALSE
EIF2B4_11	EIF2B4	29.645/0/87.809	0/0/0	29.645	0	-4.9376	2130.9	1210.8	2.3455	0.0095	0.9905	0.019	0.19117	FALSE
SPATA5_6	SPATA5	29.645/89.707/0	4.1578/0/0	29.645	0	-4.9376	2243.1	1210.8	2.3455	0.0095	0.9905	0.019	0.19117	FALSE
RPS14_1	RPS14	29.645/71.963/0	0/0/0	29.645	0	-4.9376	1334.8	1210.8	2.3455	0.0095	0.9905	0.019	0.19117	FALSE
NXF5_1	NXF5	29.645/0/77.165	97.708/0/0	29.645	0	-4.9376	1568.5	1210.8	2.3455	0.0095	0.9905	0.019	0.19117	FALSE
ARGLU1_5	ARGLU1	88.936/28.588/29.27	0/0/53.262	29.27	0	-4.9198	1780.3	1195.5	2.3407	0.009623	0.99038	0.019246	0.19301	FALSE
SRP14_15	SRP14	19.523/77.877/29.27	0/39.709/0	29.27	0	-4.9198	1228.9	1195.5	2.3407	0.009623	0.99038	0.019246	0.19301	FALSE
RALGAPA1_4	RALGAPA1	35.43/18.73/29.27	53.012/0/0	29.27	0	-4.9198	74.517	1195.5	2.3407	0.009623	0.99038	0.019246	0.19301	FALSE
ARIH1_12	ARIH1	17.353/71.963/31.93	1.0394/70.908/0	31.93	1.0394	-4.0132	907.53	1304.2	2.3381	0.0096911	0.99031	0.019382	0.19391	FALSE
SSX4_15	SSX4	204.63/200.11/11.53	19.749/7.5635/63.724	200.11	19.749	-3.2769	17792	8173.5	2.3371	0.0097182	0.99028	0.019436	0.19392	FALSE
NXPH2_7	NXPH2	31.815/122.24/22.174	1.0394/0.94544/97.013	31.815	1.0394	-4.0081	4134.6	1299.4	2.3367	0.0097276	0.99027	0.019455	0.19392	FALSE
GART_2	GART	28.922/56.19/23.948	23.907/0/0	28.922	0	-4.9032	384.13	1181.3	2.3363	0.0097388	0.99026	0.019478	0.19392	FALSE
NIPSNAP1_12	NIPSNAP1	246.56/562.88/375.18	91.471/66.181/218.75	375.18	91.471	-2.0244	25888	15324	2.3359	0.009749	0.99025	0.019498	0.19392	FALSE
MED12_11	MED12	397.68/699.91/607.56	277.53/129.53/240.63	607.56	240.63	-1.3326	26289	24816	2.3315	0.0098646	0.99014	0.019729	0.19561	FALSE
COPS6_9	COPS6	23.138/123.22/28.383	0/0/97.964	28.383	0	-4.8769	4511.2	1159.3	2.3292	0.0099237	0.99008	0.019847	0.1963	FALSE
KIAA1432_14	KIAA1432	28.199/0/55.878	0/0/102.72	28.199	0	-4.8679	780.66	1151.8	2.3268	0.0099877	0.99001	0.019975	0.19741	FALSE
ARPC4_10	ARPC4	357.19/349.95/251.01	24.947/228.8/78.942	349.95	78.942	-2.1343	4921.4	14294	2.3261	0.010007	0.98999	0.020014	0.19763	FALSE
CTR9_10	CTR9	76.644/27.602/23.948	37.42/0/0	27.602	0	-4.838	1209.3	1127.4	2.3189	0.010201	0.9898	0.020403	0.20082	FALSE
HSPE1_2	HSPE1	47.722/27.602/0	0/25.527/0	27.602	0	-4.838	583.34	1127.4	2.3189	0.010201	0.9898	0.020403	0.20082	FALSE
CHMP1A_5	CHMP1A	354.3/488.95/287.37	82.116/77.526/189.27	354.3	82.116	-2.0958	11305	14471	2.3177	0.010233	0.98977	0.020465	0.20108	FALSE
CDK12_10	CDK12	137.38/290.81/348.57	141.36/2.8363/51.36	290.81	51.36	-2.4785	13438	11878	2.3176	0.010235	0.98976	0.020471	0.20108	FALSE
hsa-mir-6859-1_6	hsa-mir-6859-1	27.476/69.005/0	0/0/0	27.476	0	-4.8317	1239.8	1122.2	2.3172	0.010247	0.98975	0.020495	0.20108	FALSE
SPATA25_5	SPATA25	27.476/82.806/0.88695	0/2.8363/0	27.476	0	-4.8317	1884.2	1122.2	2.3172	0.010247	0.98975	0.020495	0.20108	FALSE
CARS_15	CARS	55.676/0/70.956	2.0789/0/17.12	55.676	2.0789	-4.2022	1666.6	2274	2.3163	0.01027	0.98973	0.02054	0.20119	FALSE
NonTargeting_Human_0109	NonTargeting_Human_0109	694.14/963.11/509.11	267.14/304.43/371.88	694.14	304.43	-1.1864	53292	28352	2.3151	0.010303	0.9897	0.020606	0.20132	FALSE
DHRSX_4	DHRSX	27.476/0/130.38	1.0394/0/0.95111	27.476	0.95111	-3.8674	5672.3	1122.2	2.3149	0.010309	0.98969	0.020619	0.20132	FALSE
CAPZA1_2	CAPZA1	54.953/40.417/73.617	2.0789/0/76.088	54.953	2.0789	-4.1837	279.82	2244.5	2.3099	0.010447	0.98955	0.020895	0.2032	FALSE
DAP3_3	DAP3	65.799/137.02/125.06	70.682/0/7.6088	125.06	7.6088	-3.8722	1827.6	5108	2.308	0.0105	0.9895	0.021001	0.20407	FALSE
WDR33_1	WDR33	26.753/158.71/0	2.0789/0/0	26.753	0	-4.7946	9064.4	1092.7	2.3073	0.010518	0.98948	0.021037	0.2041	FALSE
UBA2_6	UBA2	26.753/0/47.896	0/53.89/0	26.753	0	-4.7946	581.37	1092.7	2.3073	0.010518	0.98948	0.021037	0.2041	FALSE
LAMTOR4_1	LAMTOR4	269.7/92.664/345.03	138.25/43.49/37.093	269.7	43.49	-2.6051	18508	11016	2.3068	0.010533	0.98947	0.021066	0.20411	FALSE
GINS2_12	GINS2	0/87.735/26.609	49.893/0/0	26.609	0	-4.787	2222.2	1086.8	2.3053	0.010574	0.98943	0.021148	0.20436	FALSE
ERCC3_2	ERCC3	84.598/299.68/235.04	4.1578/31.2/115.08	235.04	31.2	-2.8739	13406	9600.2	2.3042	0.010607	0.98939	0.021213	0.20437	FALSE
ATP11A_3	ATP11A	400.58/475.15/210.21	601.84/109.67/31.386	400.58	109.67	-1.8594	20901	16361	2.3039	0.010615	0.98939	0.02123	0.20437	FALSE
SRCAP_3	SRCAP	285.61/517.54/626.19	128.89/451.92/183.56	517.54	183.56	-1.4903	32798	21138	2.3036	0.010623	0.98938	0.021246	0.20437	FALSE
NonTargeting_Human_0301	NonTargeting_Human_0301	28.922/0/63.861	1.0394/67.126/0	28.922	1.0394	-3.875	1028.6	1181.3	2.3002	0.010719	0.98928	0.021439	0.20587	FALSE
HYOU1_6	HYOU1	496.74/424.87/461.22	35.341/147.49/164.54	461.22	147.49	-1.6382	1291.4	18838	2.2991	0.010749	0.98925	0.021497	0.20627	FALSE
SSR2_14	SSR2	735.35/660.48/643.04	283.77/306.32/181.66	660.48	283.77	-1.2159	2955.1	26977	2.2946	0.010879	0.98912	0.021758	0.20784	FALSE
IPO9_10	IPO9	46.999/49.289/82.487	1.0394/1.8909/3.8044	49.289	1.8909	-4.1207	553.66	2013.2	2.2942	0.01089	0.98911	0.02178	0.20784	FALSE
COPS2_1	COPS2	71.583/0/28.383	1.0394/0/45.653	28.383	1.0394	-3.8487	1335.9	1159.3	2.293	0.010923	0.98908	0.021845	0.20827	FALSE
GNB1L_2	GNB1L	593.63/260.25/232.38	119.54/35.927/40.898	260.25	40.898	-2.6405	55961	10630	2.292	0.010953	0.98905	0.021906	0.20827	FALSE
GPN1_15	GPN1	10.123/25.63/58.539	0/0/0	25.63	0	-4.735	661.73	1046.9	2.2916	0.010964	0.98904	0.021928	0.20827	FALSE
HSPE1_12	HSPE1	24.584/25.63/52.33	11.434/0/0	25.63	0	-4.735	356.99	1046.9	2.2916	0.010964	0.98904	0.021928	0.20827	FALSE
GMPPB_12	GMPPB	13.738/25.63/30.156	69.643/0/0	25.63	0	-4.735	80.956	1046.9	2.2916	0.010964	0.98904	0.021928	0.20827	FALSE
MED12_4	MED12	151.84/362.77/271.41	163.19/45.381/30.435	271.41	45.381	-2.5542	11321	11085	2.2907	0.010989	0.98901	0.021978	0.20859	FALSE
SMC1A_1	SMC1A	122.92/309.54/249.23	2.0789/45.381/37.093	249.23	37.093	-2.7157	9795.8	10180	2.2878	0.011074	0.98893	0.022148	0.20935	FALSE
EIF3C_12	EIF3C	25.307/132.1/0.88695	0/50.108/0	25.307	0	-4.7174	6000.1	1033.7	2.287	0.011098	0.9889	0.022196	0.20935	FALSE
MRPS31_2	MRPS31	191.61/118.29/235.04	0/19.854/20.924	191.61	19.854	-3.2073	3630.8	7826.2	2.2866	0.011109	0.98889	0.022218	0.20938	FALSE
SEC61B_15	SEC61B	179.32/654.56/484.28	343.02/164.51/141.71	484.28	164.51	-1.5519	60998	19780	2.2832	0.011209	0.98879	0.022418	0.21075	FALSE
LSM7_4	LSM7	0/133.08/24.835	36.381/0.94544/0	24.835	0.94544	-3.7311	6167	1014.4	2.2802	0.011299	0.9887	0.022599	0.21184	FALSE
CDT1_5	CDT1	33.984/0/24.835	0/0.94544/104.62	24.835	0.94544	-3.7311	350.24	1014.4	2.2802	0.011299	0.9887	0.022599	0.21184	FALSE
TBC1D25_7	TBC1D25	0/65.062/51.443	2.0789/30.254/0	51.443	2.0789	-4.0903	1415.9	2101.2	2.2777	0.011373	0.98863	0.022746	0.21274	FALSE
RPL41_4	RPL41	67.245/24.645/0	0/0/0	24.645	0	-4.6806	1211.1	1006.6	2.2774	0.011382	0.98862	0.022764	0.21274	FALSE
NCBP2_10	NCBP2	34.707/24.645/0	0/0.94544/38.044	24.645	0.94544	-3.7205	354.3	1006.6	2.2774	0.011382	0.98862	0.022764	0.21274	FALSE
DPAGT1_8	DPAGT1	40.491/24.645/0	70.682/0/0	24.645	0	-4.6806	429.24	1006.6	2.2774	0.011382	0.98862	0.022764	0.21274	FALSE
COX5B_10	COX5B	256.69/271.09/84.261	175.67/40.654/0	256.69	40.654	-2.6291	14969	10484	2.2763	0.011415	0.98858	0.02283	0.21319	FALSE
SPNS1_14	SPNS1	441.07/512.61/345.03	138.25/196.65/113.18	441.07	138.25	-1.6666	7171.2	18015	2.2725	0.011529	0.98847	0.023057	0.21482	FALSE
ANAPC16_12	ANAPC16	154.73/324.32/204	4.1578/135.2/23.778	204	23.778	-3.0485	8452.5	8332.2	2.27	0.011604	0.9884	0.023208	0.2159	FALSE
DET1_13	DET1	26.753/26.616/11.53	1.0394/0/17.12	26.616	1.0394	-3.7593	113.8	1087.1	2.269	0.011635	0.98836	0.02327	0.21631	FALSE
COPS6_6	COPS6	0/59.147/23.948	0/0.94544/0	23.948	0	-4.6408	906.25	978.13	2.267	0.011694	0.98831	0.023389	0.21694	FALSE
RALGAPA1_3	RALGAPA1	54.23/7.8863/23.948	0/0/0	23.948	0	-4.6408	587.48	978.13	2.267	0.011694	0.98831	0.023389	0.21694	FALSE
SMC1A_7	SMC1A	23.861/14.787/63.861	0/0/0	23.861	0	-4.6358	841.16	974.59	2.2657	0.011734	0.98827	0.023469	0.21709	FALSE
INTS6_10	INTS6	23.861/31.545/0	0/0.94544/37.093	23.861	0.94544	-3.6757	314.2	974.59	2.2657	0.011734	0.98827	0.023469	0.21709	FALSE
PROX1_11	PROX1	67.968/364.74/262.54	22.868/99.271/43.751	262.54	43.751	-2.558	24152	10723	2.265	0.011757	0.98824	0.023514	0.21709	FALSE
INTS6_1	INTS6	84.598/23.659/0.88695	0/0/0	23.659	0	-4.624	2116.1	966.33	2.2627	0.011828	0.98817	0.023656	0.21797	FALSE
CCDC22_6	CCDC22	258.86/297.71/18.626	42.617/0.94544/112.23	258.86	42.617	-2.5747	29610	10573	2.2606	0.011893	0.98811	0.023786	0.21869	FALSE
DNAJC13_3	DNAJC13	318.87/372.63/83.374	69.643/16.073/74.186	318.87	69.643	-2.1789	29174	13024	2.2598	0.011915	0.98808	0.023831	0.21885	FALSE
PHKG2_6	PHKG2	23.138/0/61.2	0/35.927/0	23.138	0	-4.5932	992.04	945.05	2.2547	0.012076	0.98792	0.024153	0.22068	FALSE
PROX1_15	PROX1	23.138/0/58.539	0/81.308/0	23.138	0	-4.5932	894.3	945.05	2.2547	0.012076	0.98792	0.024153	0.22068	FALSE
CDC23_14	CDC23	76.644/127.17/59.426	151.76/3.7818/0	76.644	3.7818	-4.0213	1424.5	3130.5	2.2546	0.012078	0.98792	0.024156	0.22068	FALSE
RPP38_4	RPP38	19.523/58.161/23.061	0/0/0	23.061	0	-4.5886	622.29	941.9	2.2535	0.012114	0.98789	0.024228	0.22084	FALSE
VPS29_13	VPS29	347.07/443.6/183.6	85.235/21.745/158.83	347.07	85.235	-2.013	18021	14176	2.2515	0.012177	0.98782	0.024355	0.22166	FALSE
POLR3H_7	POLR3H	146.06/256.3/231.5	33.262/38.763/11.413	231.5	33.262	-2.7625	3957.5	9455.3	2.2505	0.012209	0.98779	0.024418	0.22189	FALSE
ZBTB17_5	ZBTB17	704.98/1152.4/473.63	323.27/596.57/161.69	704.98	323.27	-1.1224	126850	28795	2.25	0.012224	0.98778	0.024449	0.22189	FALSE
PGS1_14	PGS1	0/22.673/137.48	25.986/0/0	22.673	0	-4.5652	6847.1	926.07	2.2475	0.012305	0.98769	0.024611	0.223	FALSE
C21orf59_10	C21orf59	15.184/22.673/67.409	28.065/0/0	22.673	0	-4.5652	1028.7	926.07	2.2475	0.012305	0.98769	0.024611	0.223	FALSE
DROSHA_8	DROSHA	87.49/153.78/62.087	66.525/4.7272/0	87.49	4.7272	-3.9496	2520	3573.5	2.2466	0.012332	0.98767	0.024664	0.22331	FALSE
PPAT_4	PPAT	49.168/0/44.348	109.14/1.8909/0	44.348	1.8909	-3.9714	994.98	1811.4	2.2452	0.012378	0.98762	0.024757	0.22366	FALSE
DAP3_2	DAP3	65.799/20.702/98.452	3.1183/0/139.81	65.799	3.1183	-4.0197	1550	2687.5	2.2444	0.012404	0.9876	0.024809	0.22396	FALSE
PRDM8_7	PRDM8	382.5/277.99/250.12	10.394/51.999/209.24	277.99	51.999	-2.3962	5849.2	11354	2.242	0.012481	0.98752	0.024962	0.22501	FALSE
MSTO1_6	MSTO1	52.783/0/22.174	0/17.963/0	22.174	0	-4.5344	714.31	905.68	2.2395	0.01256	0.98744	0.02512	0.22593	FALSE
MRPL42_15	MRPL42	45.553/0/22.174	0/19.854/0	22.174	0	-4.5344	519.13	905.68	2.2395	0.01256	0.98744	0.02512	0.22593	FALSE
VPS35_3	VPS35	519.16/241.52/469.2	32.223/164.51/160.74	469.2	160.74	-1.5396	27167	19164	2.2387	0.012587	0.98741	0.025174	0.22609	FALSE
C2orf49_6	C2orf49	0/43.375/78.052	31.183/1.8909/0	43.375	1.8909	-3.9402	1541.9	1771.6	2.2351	0.012706	0.98729	0.025413	0.22756	FALSE
DCPS_5	DCPS	60.014/26.616/85.148	0/2.8363/8.56	60.014	2.8363	-3.9913	873.55	2451.2	2.2326	0.012787	0.98721	0.025575	0.22777	FALSE
USP22_8	USP22	194.5/499.79/392.03	77.958/242.98/113.18	392.03	113.18	-1.7833	25315	16012	2.2319	0.012812	0.98719	0.025625	0.22777	FALSE
CDIPT_8	CDIPT	452.64/383.47/172.07	108.1/125.74/63.724	383.47	108.1	-1.8172	24737	15663	2.2318	0.012815	0.98719	0.02563	0.22777	FALSE
TP53TG3_6	TP53TG3	59.291/21.687/1.7739	98.747/0/0	21.687	0	-4.5038	905.29	885.8	2.2317	0.012817	0.98718	0.025635	0.22777	FALSE
NCBP1_10	NCBP1	46.999/21.687/0	0/83.199/0	21.687	0	-4.5038	555.51	885.8	2.2317	0.012817	0.98718	0.025635	0.22777	FALSE
SDHAF1_2	SDHAF1	287.78/282.92/200.45	43.657/180.58/55.164	282.92	55.164	-2.3378	3412.4	11556	2.2302	0.012866	0.98713	0.025732	0.22777	FALSE
UPF1_11	UPF1	63.629/0/21.287	0/0.94544/103.67	21.287	0.94544	-3.518	1123	869.45	2.2251	0.013036	0.98696	0.026072	0.22938	FALSE
MRPL42_13	MRPL42	64.352/11.829/21.287	0/0/28.533	21.287	0	-4.4781	972.04	869.45	2.2251	0.013036	0.98696	0.026072	0.22938	FALSE
GNB2L1_6	GNB2L1	0/82.806/21.287	0/0/29.484	21.287	0	-4.4781	2118.9	869.45	2.2251	0.013036	0.98696	0.026072	0.22938	FALSE
SP140_10	SP140	39.045/0/21.287	0/0/0	21.287	0	-4.4781	384.25	869.45	2.2251	0.013036	0.98696	0.026072	0.22938	FALSE
RUVBL1_12	RUVBL1	89.66/59.147/15.078	114.34/2.8363/0	59.147	2.8363	-3.9707	1436.5	2415.8	2.2249	0.013043	0.98696	0.026086	0.22938	FALSE
MYOZ3_10	MYOZ3	54.23/124.21/62.974	3.1183/0.94544/69.431	62.974	3.1183	-3.9573	1913.1	2572.1	2.2203	0.013199	0.9868	0.026397	0.23123	FALSE
GTF2H3_3	GTF2H3	20.969/0/55.878	50.933/0/0	20.969	0	-4.4574	829.18	856.45	2.2198	0.013215	0.98679	0.026429	0.23123	FALSE
SLC12A9_15	SLC12A9	204.63/0.98579/143.69	1.0394/28.363/12.364	143.69	12.364	-3.4365	12039	5868.8	2.2175	0.013294	0.98671	0.026588	0.23245	FALSE
CLEC12B_15	CLEC12B	30.369/20.702/0	37.42/0/0	20.702	0	-4.4397	261	845.54	2.2153	0.013368	0.98663	0.026736	0.23308	FALSE
NMT1_9	NMT1	34.707/20.702/0	0/25.527/0	20.702	0	-4.4397	312.35	845.54	2.2153	0.013368	0.98663	0.026736	0.23308	FALSE
UPF1_1	UPF1	33.261/22.673/0	1.0394/0/109.38	22.673	1.0394	-3.537	313.08	926.07	2.2102	0.013544	0.98646	0.027088	0.23548	FALSE
RUVBL1_3	RUVBL1	23.138/0/20.4	0/0/29.484	20.4	0	-4.4195	211.83	833.22	2.2102	0.013545	0.98645	0.02709	0.23548	FALSE
MED12_13	MED12	315.25/378.54/149.01	151.76/72.799/22.827	315.25	72.799	-2.0994	15822	12876	2.2081	0.013617	0.98638	0.027234	0.23637	FALSE
PRPF6_5	PRPF6	0/75.906/44.348	2.0789/58.617/0	44.348	2.0789	-3.8805	1481.3	1811.4	2.2075	0.01364	0.98636	0.02728	0.23647	FALSE
UBE2I_4	UBE2I	59.291/19.716/0	0/66.181/0	19.716	0	-4.3727	977.45	805.28	2.1983	0.013962	0.98604	0.027925	0.24018	FALSE
CDC73_10	CDC73	24.584/19.716/0	24.947/0/0	19.716	0	-4.3727	206.21	805.28	2.1983	0.013962	0.98604	0.027925	0.24018	FALSE
DNAJC17_1	DNAJC17	30.369/19.716/0.88695	2.0789/0/0	19.716	0	-4.3727	234	805.28	2.1983	0.013962	0.98604	0.027925	0.24018	FALSE
LAMTOR4_2	LAMTOR4	265.36/143.93/266.97	233.88/50.108/16.169	265.36	50.108	-2.3818	7374.9	10839	2.197	0.014011	0.98599	0.028023	0.24086	FALSE
HSPE1_1	HSPE1	19.523/0/20.4	0/0.94544/0	19.523	0	-4.3591	190.95	797.39	2.1949	0.014084	0.98592	0.028169	0.24133	FALSE
PRMT1_2	PRMT1	19.523/0/52.33	0/0/0	19.523	0	-4.3591	728.74	797.39	2.1949	0.014084	0.98592	0.028169	0.24133	FALSE
CARS_5	CARS	19.523/0/59.426	3.1183/0/0	19.523	0	-4.3591	986.7	797.39	2.1949	0.014084	0.98592	0.028169	0.24133	FALSE
SRP9_2	SRP9	308.75/267.15/151.67	0/51.054/150.27	267.15	51.054	-2.365	7532.9	10911	2.1948	0.014089	0.98591	0.028177	0.24133	FALSE
RAB23_10	RAB23	25.307/0/19.513	0/0/58.969	19.513	0	-4.3585	207.16	796.99	2.1948	0.01409	0.98591	0.028181	0.24133	FALSE
UBE2Q1_10	UBE2Q1	47.722/235.6/194.24	63.406/22.691/24.729	194.24	24.729	-2.9238	11590	7933.7	2.194	0.014117	0.98588	0.028235	0.24133	FALSE
SHC1_14	SHC1	149.67/70.977/236.82	96.669/14.182/11.413	149.67	14.182	-3.311	6893.6	6113.3	2.1929	0.014158	0.98584	0.028316	0.2415	FALSE
DOCK5_9	DOCK5	337.67/243.49/14.191	41.578/10.4/165.49	243.49	41.578	-2.5216	30724	9945.2	2.1905	0.014243	0.98576	0.028486	0.24279	FALSE
RALGAPB_9	RALGAPB	112.07/127.17/93.13	8.3156/72.799/0	112.07	8.3156	-3.6015	293.33	4577.6	2.1846	0.014461	0.98554	0.028921	0.24513	FALSE
NonTargeting_Human_0281	NonTargeting_Human_0281	354.3/1054.8/632.4	317.03/200.43/281.53	632.4	281.53	-1.1647	127880	25830	2.1843	0.014471	0.98553	0.028942	0.24513	FALSE
MED12_5	MED12	528.56/417.97/791.16	67.564/341.3/208.29	528.56	208.29	-1.3393	40595	21589	2.184	0.014481	0.98552	0.028962	0.24514	FALSE
WDR82_11	WDR82	18.8/69.005/0	0/0/0	18.8	0	-4.3074	1437	767.86	2.1819	0.014559	0.98544	0.029117	0.24594	FALSE
KAT7_5	KAT7	157.63/168.57/92.243	1.0394/107.78/16.169	157.63	16.169	-3.2078	2197.4	6438.2	2.1814	0.014576	0.98542	0.029152	0.24606	FALSE
GTF2A2_13	GTF2A2	23.861/0/18.626	0/0/0	18.626	0	-4.2947	187.17	760.77	2.1787	0.014677	0.98532	0.029354	0.24706	FALSE
MSTO1_7	MSTO1	231.38/291.79/147.23	200.61/37.818/0	231.38	37.818	-2.5817	5365.1	9450.5	2.1778	0.014709	0.98529	0.029418	0.24706	FALSE
CERS6_4	CERS6	191.61/355.87/297.13	66.525/182.47/63.724	297.13	66.525	-2.1425	7292.3	12136	2.1776	0.014716	0.98528	0.029432	0.24706	FALSE
USP39_14	USP39	180.77/249.4/149.9	21.828/4.7272/43.751	180.77	21.828	-2.9932	2832.1	7383.2	2.177	0.014739	0.98526	0.029477	0.24709	FALSE
SPNS1_8	SPNS1	389.01/363.76/94.017	102.91/295.92/90.355	363.76	102.91	-1.8117	36698	14857	2.1761	0.014776	0.98522	0.029551	0.24738	FALSE
LSS_3	LSS	259.58/622.03/586.28	303.52/133.31/250.14	586.28	250.14	-1.2255	54005	23946	2.1742	0.014846	0.98515	0.029692	0.24804	FALSE
ATXN7L3_6	ATXN7L3	147.5/280.95/253.67	34.302/47.272/139.81	253.67	47.272	-2.3994	6007.6	10361	2.169	0.015042	0.98496	0.030083	0.25011	FALSE
HSPE1_4	HSPE1	18.077/0/40.8	0/0/15.218	18.077	0	-4.2537	421.56	738.32	2.1684	0.015063	0.98494	0.030126	0.25026	FALSE
ATP6V1H_15	ATP6V1H	0/50.275/17.739	0/0/0	17.739	0	-4.228	686.64	724.54	2.162	0.015309	0.98469	0.030619	0.25302	FALSE
ZBTB17_9	ZBTB17	135.21/227.72/68.296	12.473/225.02/0	135.21	12.473	-3.3377	6517.5	5522.6	2.1592	0.015417	0.98458	0.030833	0.25393	FALSE
FNDC3B_4	FNDC3B	151.12/173.5/313.09	61.327/20.8/0	173.5	20.8	-3.0008	9994	7086.4	2.1571	0.015498	0.9845	0.030995	0.25465	FALSE
RUVBL1_15	RUVBL1	19.523/69.005/0.88695	1.0394/0/36.142	19.523	1.0394	-3.331	1397.9	797.39	2.157	0.015502	0.9845	0.031004	0.25465	FALSE
DYRK1A_4	DYRK1A	132.32/221.8/214.64	33.262/66.181/23.778	214.64	33.262	-2.654	3414.2	8766.9	2.1547	0.015592	0.98441	0.031184	0.25556	FALSE
MRPS21_1	MRPS21	179.32/202.09/72.73	88.353/11.345/22.827	179.32	22.827	-2.9199	5939.8	7324.2	2.1457	0.015947	0.98405	0.031895	0.26004	FALSE
KBTBD12_1	KBTBD12	130.15/7.8863/16.852	0/0/46.604	16.852	0	-4.158	6458.5	688.31	2.1446	0.015994	0.98401	0.031988	0.26045	FALSE
VPS35_6	VPS35	113.52/0/16.852	1.0394/0/0	16.852	0	-4.158	4814.4	688.31	2.1446	0.015994	0.98401	0.031988	0.26045	FALSE
MARS2_6	MARS2	44.107/16.758/0	0/127.63/0	16.758	0	-4.1504	514.39	684.48	2.1427	0.01607	0.98393	0.03214	0.26068	FALSE
NUDT21_3	NUDT21	28.199/16.758/0	0/0/124.59	16.758	0	-4.1504	205.87	684.48	2.1427	0.01607	0.98393	0.03214	0.26068	FALSE
MFAP1_12	MFAP1	16.63/0/21.287	0/0/0	16.63	0	-4.14	149.13	679.26	2.1401	0.016174	0.98383	0.032349	0.26181	FALSE
COPS2_5	COPS2	16.63/67.034/3.5478	39.499/0/0	16.63	0	-4.14	1355.8	679.26	2.1401	0.016174	0.98383	0.032349	0.26181	FALSE
POLR3H_11	POLR3H	34.707/0/85.148	0/1.8909/14.267	34.707	1.8909	-3.6266	1874.4	1417.6	2.1367	0.016311	0.98369	0.032622	0.26329	FALSE
LYZ_7	LYZ	224.87/561.9/341.48	306.64/94.544/60.871	341.48	94.544	-1.8418	31091	13947	2.1349	0.016383	0.98362	0.032765	0.26396	FALSE
SORT1_2	SORT1	224.87/22.673/190.7	66.525/26.472/26.631	190.7	26.631	-2.7945	14700	7788.8	2.1343	0.016408	0.98359	0.032817	0.2642	FALSE
PHF3_10	PHF3	176.43/19.716/62.087	31.183/3.7818/0	62.087	3.7818	-3.7217	7434.5	2535.9	2.1332	0.016456	0.98354	0.032912	0.26462	FALSE
USP22_5	USP22	334.05/323.34/196.9	228.68/73.745/84.648	323.34	84.648	-1.921	8050.2	13207	2.1323	0.016491	0.98351	0.032982	0.26483	FALSE
CHMP1A_4	CHMP1A	272.59/289.82/588.94	271.3/0/67.529	289.82	67.529	-2.0854	44884	11838	2.1267	0.016721	0.98328	0.033443	0.26745	FALSE
CEBPA_2	CEBPA	354.3/266.16/227.95	242.19/29.309/56.115	266.16	56.115	-2.2258	4614.3	10871	2.1267	0.016721	0.98328	0.033443	0.26745	FALSE
POLR2E_12	POLR2E	33.261/0/17.739	1.0394/0.94544/91.306	17.739	1.0394	-3.1998	277.8	724.54	2.1236	0.01685	0.98315	0.033701	0.26884	FALSE
PACRGL_6	PACRGL	151.12/143.93/65.635	51.972/0/15.218	143.93	15.218	-3.1597	3090.6	5878.5	2.1232	0.016869	0.98313	0.033738	0.26896	FALSE
SNRPD1_9	SNRPD1	0/15.773/33.704	0/0/0	15.773	0	-4.068	285.16	644.22	2.1223	0.016908	0.98309	0.033817	0.26941	FALSE
CDC23_2	CDC23	34.707/36.474/70.069	2.0789/0.94544/145.52	36.474	2.0789	-3.6054	565.88	1489.8	2.1193	0.017033	0.98297	0.034067	0.2706	FALSE
DYRK1A_2	DYRK1A	138.1/394.32/307.77	34.302/77.526/157.88	307.77	77.526	-1.9753	18138	12571	2.1193	0.017034	0.98297	0.034069	0.2706	FALSE
ABCG5_11	ABCG5	81.706/89.707/95.791	3.1183/56.727/6.6577	89.707	6.6577	-3.5662	50.517	3664	2.1192	0.017039	0.98296	0.034077	0.2706	FALSE
PDRG1_11	PDRG1	33.261/66.048/0	64.446/1.8909/0	33.261	1.8909	-3.567	1090.6	1358.5	2.1185	0.017065	0.98293	0.034131	0.27085	FALSE
KAT8_10	KAT8	75.921/0.98579/83.374	5.1972/113.45/0.95111	75.921	5.1972	-3.6337	2835.4	3101	2.1169	0.017132	0.98287	0.034264	0.27142	FALSE
NDUFV1_14	NDUFV1	15.184/0/177.39	0/0/16.169	15.184	0	-4.0165	13271	620.19	2.1095	0.017449	0.98255	0.034898	0.2756	FALSE
USP22_6	USP22	394.79/664.42/722.87	317.03/359.27/218.75	664.42	317.03	-1.0651	38058	27138	2.1094	0.017455	0.98254	0.03491	0.2756	FALSE
CHMP1A_7	CHMP1A	248.01/204.06/409.77	29.104/67.126/49.458	248.01	49.458	-2.3031	14050	10130	2.108	0.017515	0.98249	0.03503	0.27619	FALSE
ATP5I_11	ATP5I	53.506/0/15.078	0/0/0	15.078	0	-4.007	852.04	615.86	2.1072	0.01755	0.98245	0.0351	0.27656	FALSE
WDR82_12	WDR82	220.53/271.09/196.02	38.46/66.181/12.364	220.53	38.46	-2.4891	1578.6	9007.5	2.1053	0.017634	0.98237	0.035268	0.27753	FALSE
PIM2_13	PIM2	294.29/233.63/108.21	43.657/36.872/343.35	233.63	43.657	-2.3934	9704.9	9542.5	2.1046	0.017664	0.98234	0.035329	0.27783	FALSE
ZBTB10_14	ZBTB10	242.23/127.17/219.96	38.46/112.51/32.338	219.96	38.46	-2.4854	4553.5	8984.3	2.1019	0.01778	0.98222	0.03556	0.27887	FALSE
PHF3_8	PHF3	0/14.787/25.722	0/0/0	14.787	0	-3.9806	169.11	603.96	2.1007	0.017833	0.98217	0.035667	0.27887	FALSE
POLR1B_4	POLR1B	21.692/14.787/7.0956	0/0.94544/0	14.787	0	-3.9806	53.417	603.96	2.1007	0.017833	0.98217	0.035667	0.27887	FALSE
MED12_15	MED12	240.78/293.76/330.83	159.04/28.363/72.284	293.76	72.284	-2.008	2090.8	11999	2.097	0.017996	0.982	0.035992	0.28051	FALSE
MRP63_3	MRP63	198.12/150.83/134.82	17.671/0/27.582	150.83	17.671	-3.0236	1246.5	6160.4	2.0955	0.018063	0.98194	0.036127	0.2812	FALSE
TSPAN11_6	TSPAN11	302.96/85.764/293.58	72.761/210.83/72.284	293.58	72.761	-1.9977	21638	11991	2.0909	0.018268	0.98173	0.036536	0.28313	FALSE
MRPL33_2	MRPL33	301.52/217.86/54.991	38.46/34.036/84.648	217.86	38.46	-2.4716	16762	8898.3	2.0895	0.018332	0.98167	0.036664	0.28376	FALSE
ATXN7L3_5	ATXN7L3	279.1/651.61/455.89	130.97/172.07/206.39	455.89	172.07	-1.4005	34779	18621	2.089	0.018356	0.98164	0.036711	0.28385	FALSE
MRPL9_12	MRPL9	0/74.92/14.191	0/22.691/0	14.191	0	-3.9252	1944.7	579.63	2.0871	0.018441	0.98156	0.036881	0.28458	FALSE
ATP11A_10	ATP11A	18.077/4.9289/14.191	0/0/0	14.191	0	-3.9252	50.443	579.63	2.0871	0.018441	0.98156	0.036881	0.28458	FALSE
URI1_6	URI1	209.69/411.07/384.05	112.26/154.11/125.55	384.05	125.55	-1.6054	15566	15686	2.087	0.018446	0.98155	0.036891	0.28458	FALSE
SUMO2_9	SUMO2	55.676/200.11/225.29	32.223/0/39.946	200.11	32.223	-2.5978	10748	8173.5	2.0865	0.018467	0.98153	0.036934	0.28458	FALSE
CSNK1A1_2	CSNK1A1	286.33/329.25/201.34	107.06/47.272/69.431	286.33	69.431	-2.0284	4533	11695	2.0865	0.018468	0.98153	0.036936	0.28458	FALSE
ST6GAL1_15	ST6GAL1	324.65/545.14/537.49	353.41/229.74/85.6	537.49	229.74	-1.2226	22680	21954	2.0801	0.018758	0.98124	0.037516	0.28779	FALSE
RBM14_9	RBM14	13.738/11.829/56.765	0/18.909/0	13.738	0	-3.8815	927.48	561.12	2.0764	0.01893	0.98107	0.03786	0.28989	FALSE
DHRSX_8	DHRSX	103.4/0/75.391	78.998/5.6727/0	75.391	5.6727	-3.5171	3234.1	3079.3	2.0746	0.01901	0.98099	0.038019	0.29067	FALSE
HTRA2_4	HTRA2	315.98/336.15/455.89	116.42/69.017/97.964	336.15	97.964	-1.7684	7372.5	13730	2.0745	0.019017	0.98098	0.038034	0.29067	FALSE
MRPL28_2	MRPL28	273.32/146.88/243.03	49.893/41.599/55.164	243.03	49.893	-2.2615	5080.5	9926.2	2.0735	0.019064	0.98094	0.038127	0.29109	FALSE
MBTPS2_10	MBTPS2	51.337/217.86/255.44	39.499/0/181.66	217.86	39.499	-2.434	14571	8898.3	2.0734	0.019068	0.98093	0.038136	0.29109	FALSE
DPY30_5	DPY30	156.9/298.69/247.46	51.972/23.636/128.4	247.46	51.972	-2.2297	5412.6	10107	2.072	0.019132	0.98087	0.038265	0.29179	FALSE
STT3A_3	STT3A	75.921/379.53/277.62	66.525/22.691/131.25	277.62	66.525	-2.0448	25533	11339	2.0697	0.019241	0.98076	0.038483	0.29245	FALSE
RANBP1_7	RANBP1	43.384/104.49/28.383	143.44/0/2.8533	43.384	2.8533	-3.5259	1979.7	1772	2.0665	0.01939	0.98061	0.03878	0.29358	FALSE
OSTC_5	OSTC	47.722/0/13.304	0/23.636/0	13.304	0	-3.8384	680.79	543.41	2.0658	0.019423	0.98058	0.038845	0.29358	FALSE
HNF4A_12	HNF4A	187.27/158.71/393.81	29.104/1.8909/166.44	187.27	29.104	-2.6448	21736	7649	2.0652	0.019453	0.98055	0.038905	0.29365	FALSE
PACRGL_2	PACRGL	279.82/61.119/302.45	118.5/68.072/39.946	279.82	68.072	-2.0235	24172	11429	2.0648	0.019469	0.98053	0.038937	0.29372	FALSE
UBE2I_3	UBE2I	54.953/84.778/50.556	0/105.89/3.8044	54.953	3.8044	-3.5418	454.43	2244.5	2.0638	0.019517	0.98048	0.039034	0.29387	FALSE
NonTargeting_Human_0829	NonTargeting_Human_0829	138.83/257.29/264.31	57.17/255.27/42.8	257.29	57.17	-2.1507	7041.4	10509	2.0634	0.019538	0.98046	0.039077	0.29387	FALSE
AGPAT6_10	AGPAT6	383.22/112.38/409.77	127.85/27.418/252.04	383.22	127.85	-1.5762	37030	15652	2.0633	0.019543	0.98046	0.039086	0.29387	FALSE
NUDT17_10	NUDT17	545.91/522.47/243.91	478.15/75.635/221.61	522.47	221.61	-1.2336	39071	21340	2.0631	0.019551	0.98045	0.039102	0.29387	FALSE
SETDB1_11	SETDB1	120.75/35.488/188.03	12.473/4.7272/88.453	120.75	12.473	-3.1758	5898.4	4932	2.0614	0.019631	0.98037	0.039262	0.29471	FALSE
SYS1_6	SYS1	114.24/96.607/83.374	29.104/0/8.56	96.607	8.56	-3.3519	243.08	3945.9	2.06	0.019697	0.9803	0.039394	0.29534	FALSE
CAPZA1_3	CAPZA1	311.64/207.02/373.41	297.28/62.399/85.6	311.64	85.6	-1.8521	7380.8	12729	2.059	0.019747	0.98025	0.039494	0.29591	FALSE
VPS29_9	VPS29	13.015/218.84/0	138.25/0.94544/0	13.015	0.94544	-2.8488	21268	531.59	2.0586	0.019765	0.98023	0.039531	0.29591	FALSE
ATP5F1_6	ATP5F1	77.367/42.389/20.4	42.617/2.8363/0	42.389	2.8363	-3.4995	853.51	1731.3	2.0579	0.0198	0.9802	0.039599	0.29614	FALSE
HNF4A_13	HNF4A	271.87/416/573.86	149.68/111.56/310.06	416	149.68	-1.4686	22846	16991	2.0573	0.019826	0.98017	0.039653	0.29636	FALSE
KAT7_10	KAT7	373.1/177.44/295.36	44.696/139.93/77.04	295.36	77.04	-1.9251	9973.9	12064	2.0556	0.019912	0.98009	0.039825	0.29659	FALSE
GYG2_13	GYG2	174.26/273.06/258.99	132.01/58.617/53.262	258.99	58.617	-2.1247	3688.9	10578	2.0555	0.019914	0.98009	0.039828	0.29659	FALSE
GTF3C4_4	GTF3C4	219.81/181.38/254.56	31.183/41.599/81.795	219.81	41.599	-2.3739	1341.9	8978	2.0532	0.020028	0.97997	0.040056	0.2977	FALSE
METTL17_14	METTL17	171.37/52.247/149.9	1.0394/138.03/19.022	149.9	19.022	-2.9139	4998.1	6122.4	2.0526	0.020058	0.97994	0.040115	0.2977	FALSE
PDCD10_4	PDCD10	114.24/341.08/277.62	67.564/68.072/102.72	277.62	68.072	-2.0121	15359	11339	2.0523	0.020069	0.97993	0.040139	0.2977	FALSE
TRIAP1_12	TRIAP1	221.98/304.61/50.556	195.42/42.545/22.827	221.98	42.545	-2.3563	18107	9066.6	2.0521	0.020081	0.97992	0.040161	0.2977	FALSE
WRB_12	WRB	67.245/170.54/195.13	1.0394/33.09/24.729	170.54	24.729	-2.7371	5637.4	6965.6	2.0493	0.020218	0.97978	0.040437	0.29821	FALSE
INTS1_2	INTS1	196.67/81.82/229.72	4.1578/64.29/33.289	196.67	33.289	-2.5273	7141.6	8032.9	2.0468	0.020338	0.97966	0.040677	0.29979	FALSE
MPDU1_12	MPDU1	245.12/254.33/204.89	53.012/0.94544/318.62	245.12	53.012	-2.188	851.73	10012	2.0449	0.020431	0.97957	0.040862	0.30089	FALSE
LSM2_3	LSM2	0/54.218/12.417	82.116/0/0	12.417	0	-3.746	950.76	507.18	2.0433	0.020512	0.97949	0.041025	0.30163	FALSE
SNRPD1_14	SNRPD1	12.292/30.559/0	0/0/57.066	12.292	0	-3.7325	242.4	502.06	2.04	0.020676	0.97932	0.041353	0.30313	FALSE
INTS8_10	INTS8	12.292/0/81.6	0/0.94544/0	12.292	0	-3.7325	2477.3	502.06	2.04	0.020676	0.97932	0.041353	0.30313	FALSE
MRPS21_8	MRPS21	558.93/564.86/521.53	497.89/136.14/251.09	558.93	251.09	-1.1513	716.84	22829	2.0395	0.0207	0.9793	0.041399	0.30321	FALSE
KIAA1328_12	KIAA1328	153.29/222.79/204	36.381/0.94544/105.57	204	36.381	-2.4553	1462.3	8332.2	2.0394	0.020707	0.97929	0.041413	0.30321	FALSE
POLR2C_6	POLR2C	73.752/70.977/68.296	15.592/5.6727/0	70.977	5.6727	-3.4312	7.4461	2899	2.0369	0.020828	0.97917	0.041655	0.30396	FALSE
CEBPA_6	CEBPA	422.99/411.07/579.18	259.86/139.93/156.93	422.99	156.93	-1.4247	12269	17277	2.0366	0.020845	0.97916	0.04169	0.30396	FALSE
MED9_10	MED9	274.04/357.84/337.04	215.17/42.545/102.72	337.04	102.72	-1.7045	2201	13766	2.0353	0.020912	0.97909	0.041825	0.30455	FALSE
ATP11A_2	ATP11A	92.552/16.758/218.19	58.209/8.509/0	92.552	8.509	-3.2984	10765	3780.2	2.0316	0.021099	0.9789	0.042197	0.30638	FALSE
STARD4_10	STARD4	3.6153/11.829/39.026	0/65.236/0	11.829	0	-3.6814	403.56	483.17	2.0275	0.021304	0.9787	0.042608	0.30917	FALSE
AGPAT6_1	AGPAT6	0/250.39/188.03	87.313/23.636/31.386	188.03	31.386	-2.5452	19623	7680.1	2.0272	0.021319	0.97868	0.042637	0.3092	FALSE
RCC1_11	RCC1	1.4461/78.863/61.2	0/20.8/4.7555	61.2	4.7555	-3.4339	1941.2	2499.7	2.0265	0.021355	0.97865	0.042709	0.30954	FALSE
POLR3C_1	POLR3C	10.846/60.133/13.304	1.0394/78.472/0	13.304	1.0394	-2.8102	1099.5	543.41	2.0261	0.021377	0.97862	0.042755	0.30963	FALSE
LSM2_9	LSM2	60.737/0/92.243	49.893/4.7272/0	60.737	4.7272	-3.4302	2340.8	2480.8	2.0248	0.021443	0.97856	0.042886	0.31006	FALSE
KAT7_12	KAT7	377.44/784.69/687.39	348.21/124.8/659.12	687.39	348.21	-0.97911	52769	28076	2.0246	0.021454	0.97855	0.042908	0.31006	FALSE
HIST2H3A_6	HIST2H3A	60.737/0/247.46	129.93/0.94544/4.7555	60.737	4.7555	-3.4231	19277	2480.8	2.0222	0.021579	0.97842	0.043157	0.31131	FALSE
TBC1D22A_9	TBC1D22A	407.08/409.1/453.23	149.68/248.65/146.47	409.1	149.68	-1.4445	975.85	16709	2.0214	0.021621	0.97838	0.043243	0.31137	FALSE
KAT8_3	KAT8	11.569/55.204/0	34.302/0/0	11.569	0	-3.6518	1018.9	472.53	2.0203	0.021674	0.97833	0.043349	0.3117	FALSE
WDR7_15	WDR7	65.075/0/64.748	5.1972/0/69.431	64.748	5.1972	-3.4072	2096.2	2644.6	2.0202	0.021684	0.97832	0.043367	0.3117	FALSE
CHMP1A_6	CHMP1A	360.08/277.01/384.05	118.5/63.345/135.06	360.08	118.5	-1.5954	3738.2	14707	2.0194	0.021721	0.97828	0.043441	0.3117	FALSE
DPY30_13	DPY30	208.96/158.71/392.92	2.0789/39.709/249.19	208.96	39.709	-2.3667	18183	8535	2.0164	0.021878	0.97812	0.043755	0.31303	FALSE
POLRMT_1	POLRMT	80.983/20.702/39.026	0/14.182/2.8533	39.026	2.8533	-3.3768	1048.1	1594	2.0161	0.021893	0.97811	0.043785	0.31306	FALSE
MESDC2_5	MESDC2	141/64.076/129.5	15.592/0.94544/32.338	129.5	15.592	-2.9755	2206	5289.1	2.0144	0.021986	0.97801	0.043971	0.31402	FALSE
RPL17_8	RPL17	46.276/0/41.687	3.1183/2.8363/136.96	41.687	3.1183	-3.3737	879.43	1702.7	2.009	0.022267	0.97773	0.044534	0.31656	FALSE
SEC61B_5	SEC61B	88.936/49.289/38.139	36.381/0.94544/3.8044	49.289	3.8044	-3.3878	848.11	2013.2	2.0062	0.022415	0.97758	0.04483	0.31848	FALSE
HNF4A_10	HNF4A	108.46/236.59/250.12	127.85/51.999/52.311	236.59	52.311	-2.156	8300.2	9663.3	2.0036	0.022557	0.97744	0.045114	0.32013	FALSE
ATXN7L3_2	ATXN7L3	399.85/156.74/219.08	44.696/31.2/93.208	219.08	44.696	-2.2679	18283	8948.1	2.0031	0.022583	0.97742	0.045165	0.3203	FALSE
SETD1A_15	SETD1A	206.07/242.5/379.62	55.091/68.072/0	242.5	55.091	-2.1181	10064	9904.9	2.0028	0.022598	0.9774	0.045197	0.32034	FALSE
RPL23A_6	RPL23A	12.292/0/25.722	1.0394/0/11.413	12.292	1.0394	-2.7043	165.72	502.06	1.9999	0.022757	0.97724	0.045514	0.32227	FALSE
TRIAP1_2	TRIAP1	87.49/10.844/0	0/0/27.582	10.844	0	-3.566	2996.1	442.9	1.9995	0.022778	0.97722	0.045556	0.32227	FALSE
DDX52_12	DDX52	53.506/0/10.643	0/0/24.729	10.643	0	-3.5414	975.26	434.72	1.9935	0.023103	0.9769	0.046206	0.3256	FALSE
FAM110D_3	FAM110D	52.783/161.67/164.97	2.0789/44.436/24.729	161.67	24.729	-2.6605	5933.5	6603.3	1.9919	0.023194	0.97681	0.046387	0.3265	FALSE
WDR61_8	WDR61	99.059/311.51/269.63	69.643/93.599/15.218	269.63	69.643	-1.9377	15425	11013	1.9887	0.023368	0.97663	0.046736	0.32771	FALSE
FNDC3B_15	FNDC3B	296.45/328.27/600.47	68.603/103.05/149.32	328.27	103.05	-1.6619	37553	13408	1.9836	0.023651	0.97635	0.047302	0.33065	FALSE
ATP5I_2	ATP5I	482.28/84.778/159.65	193.34/24.582/0	159.65	24.582	-2.6508	54848	6520.9	1.9818	0.023751	0.97625	0.047501	0.33129	FALSE
RALGAPA2_8	RALGAPA2	18.077/176.46/23.948	56.13/0/1.9022	23.948	1.9022	-3.1037	11647	978.13	1.981	0.023796	0.9762	0.047593	0.33174	FALSE
SYTL3_9	SYTL3	349.24/134.07/182.71	373.16/32.145/28.533	182.71	32.145	-2.4706	15049	7462.8	1.9797	0.02387	0.97613	0.04774	0.33207	FALSE
IPO9_3	IPO9	193.78/341.08/392.03	212.05/66.181/111.28	341.08	111.28	-1.6073	12147	13931	1.9794	0.023887	0.97611	0.047774	0.33207	FALSE
VPS29_14	VPS29	216.2/100.55/204.89	40.538/1.8909/75.137	204.89	40.538	-2.3093	5507	8368.4	1.9783	0.023948	0.97605	0.047896	0.33271	FALSE
PRPF6_8	PRPF6	159.07/399.24/298.02	76.919/86.035/170.25	298.02	86.035	-1.7806	14776	12172	1.9779	0.02397	0.97603	0.047941	0.33271	FALSE
CACNA1A_15	CACNA1A	54.953/280.95/168.52	213.09/0.94544/27.582	168.52	27.582	-2.5683	12769	6883.1	1.9761	0.024073	0.97593	0.048145	0.33323	FALSE
MED12_2	MED12	195.95/504.72/549.02	39.499/222.18/302.45	504.72	222.18	-1.1801	48652	20615	1.9716	0.024328	0.97567	0.048655	0.33587	FALSE
CERS6_12	CERS6	210.41/446.56/376.07	164.23/134.25/92.257	376.07	134.25	-1.4792	16206	15360	1.9713	0.024345	0.97565	0.04869	0.33587	FALSE
USP22_2	USP22	712.94/620.06/945.49	408.5/277.96/376.64	712.94	376.64	-0.91879	31354	29119	1.971	0.024361	0.97564	0.048722	0.33587	FALSE
PTPMT1_1	PTPMT1	362.98/143.93/264.31	110.18/0/68.48	264.31	68.48	-1.933	12114	10796	1.9707	0.024382	0.97562	0.048763	0.33587	FALSE
SNAPC2_9	SNAPC2	24.584/9.8579/3.5478	0/0/0	9.8579	0	-3.4407	128.34	402.64	1.969	0.024475	0.97553	0.04895	0.33648	FALSE
LDLR_2	LDLR	436.73/436.7/498.47	115.38/452.87/175	436.73	175	-1.3144	1905.9	17838	1.9687	0.024495	0.97551	0.04899	0.33648	FALSE
KDM8_3	KDM8	161.97/264.19/204	0/194.76/40.898	204	40.898	-2.2907	2694.9	8332.2	1.9672	0.024583	0.97542	0.049166	0.33731	FALSE
ZBTB37_5	ZBTB37	177.15/290.81/342.36	83.156/34.036/428.95	290.81	83.156	-1.7939	7788.1	11878	1.966	0.024652	0.97535	0.049304	0.33787	FALSE
IRS1_3	IRS1	99.059/129.14/222.63	59.248/0/17.12	129.14	17.12	-2.8444	4822.3	5274.6	1.9646	0.024729	0.97527	0.049458	0.33874	FALSE
DYRK1A_3	DYRK1A	195.23/275.03/233.27	49.893/53.89/423.24	233.27	53.89	-2.0935	1595.8	9527.7	1.9628	0.024833	0.97517	0.049667	0.33978	FALSE
TP53TG3_11	TP53TG3	172.09/87.735/219.96	3.1183/103.05/29.484	172.09	29.484	-2.5054	4703.8	7028.8	1.9613	0.024922	0.97508	0.049844	0.34043	FALSE
IREB2_13	IREB2	183.66/177.44/0	1.0394/88.872/31.386	177.44	31.386	-2.462	15762	7247.5	1.9597	0.025013	0.97499	0.050027	0.34118	FALSE
WWP1_6	WWP1	15.907/149.84/153.44	19.749/22.691/101.77	149.84	22.691	-2.6706	8975.4	6120.1	1.9596	0.025019	0.97498	0.050037	0.34118	FALSE
CCDC115_3	CCDC115	10.846/0/56.765	1.0394/0/26.631	10.846	1.0394	-2.5381	1113.1	442.99	1.9588	0.025066	0.97493	0.050132	0.34144	FALSE
YPEL1_13	YPEL1	386.11/537.25/259.88	142.4/75.635/276.77	386.11	142.4	-1.4327	19389	15771	1.9579	0.025122	0.97488	0.050244	0.34192	FALSE
HSD17B10_6	HSD17B10	267.53/30.559/204	41.578/56.727/38.044	204	41.578	-2.2674	17059	8332.2	1.9566	0.025197	0.9748	0.050394	0.34263	FALSE
GFER_3	GFER	239.33/179.41/101.11	80.037/0.94544/32.338	179.41	32.338	-2.4361	4860.7	7328	1.9549	0.025298	0.9747	0.050597	0.34288	FALSE
hsa-mir-1302-6_1	hsa-mir-1302-6	336.22/386.43/135.7	111.22/88.872/487.92	336.22	111.22	-1.5874	21364	13733	1.9528	0.025421	0.97458	0.050843	0.34398	FALSE
STRAP_12	STRAP	161.97/425.86/357.44	41.578/124.8/244.43	357.44	124.8	-1.5106	21446	14599	1.9501	0.025582	0.97442	0.051163	0.34547	FALSE
ISG20_14	ISG20	351.41/452.48/308.66	177.75/121.02/87.502	351.41	121.02	-1.5302	6021.1	14353	1.9498	0.025601	0.9744	0.051203	0.34547	FALSE
PRPF6_6	PRPF6	86.044/204.06/292.7	1.0394/42.545/190.22	204.06	42.545	-2.2355	10892	8334.6	1.9421	0.026062	0.97394	0.052125	0.34895	FALSE
WDR61_9	WDR61	69.414/128.15/169.41	17.671/0/60.871	128.15	17.671	-2.7902	2576.1	5234.3	1.9412	0.026116	0.97388	0.052232	0.34931	FALSE
NELFB_10	NELFB	405.64/306.58/387.6	148.64/130.47/145.52	387.6	145.52	-1.4072	3444.7	15831	1.9403	0.026172	0.97383	0.052344	0.34973	FALSE
CAPZA1_4	CAPZA1	49.891/198.14/165.86	215.17/21.745/28.533	165.86	28.533	-2.4982	7245.5	6774.5	1.9391	0.026242	0.97376	0.052483	0.34979	FALSE
CCT6A_14	CCT6A	56.399/171.53/274.96	0/146.54/30.435	171.53	30.435	-2.4564	11976	7005.9	1.9391	0.026244	0.97376	0.052488	0.34979	FALSE
COMMD3_4	COMMD3	176.43/139.98/358.33	60.288/32.145/24.729	176.43	32.145	-2.4204	17208	7206	1.939	0.026252	0.97375	0.052505	0.34979	FALSE
NonTargeting_Human_0105	NonTargeting_Human_0105	293.56/199.13/474.52	204.77/76.581/87.502	293.56	87.502	-1.7348	20832	11990	1.9373	0.026356	0.97364	0.052711	0.35047	FALSE
PGS1_9	PGS1	311.64/506.69/431.95	47.815/244.87/175.95	431.95	175.95	-1.2908	10031	17643	1.9363	0.026414	0.97359	0.052828	0.3508	FALSE
SRP14_2	SRP14	135.21/248.42/357.44	59.248/63.345/101.77	248.42	63.345	-1.9547	12351	10146	1.936	0.026433	0.97357	0.052866	0.35086	FALSE
INTS1_1	INTS1	36.153/8.8721/0	1.0394/0/0	8.8721	0	-3.3034	411.48	362.37	1.9356	0.026456	0.97354	0.052911	0.35097	FALSE
GNB1L_12	GNB1L	150.4/179.41/170.3	0/30.254/30.435	170.3	30.254	-2.4544	239.55	6955.6	1.9345	0.026527	0.97347	0.053054	0.35135	FALSE
SPINT1_9	SPINT1	119.31/485.99/596.92	179.82/214.62/356.66	485.99	214.62	-1.1754	73383	19850	1.9306	0.026768	0.97323	0.053537	0.35396	FALSE
NonTargeting_Human_0924	NonTargeting_Human_0924	70.137/148.85/251.9	93.55/3.7818/23.778	148.85	23.778	-2.5964	8406.9	6079.8	1.9272	0.026977	0.97302	0.053954	0.35576	FALSE
GREB1L_15	GREB1L	105.57/19.716/31.93	166.31/2.8363/0	31.93	2.8363	-3.1016	2785.8	1304.2	1.9266	0.027012	0.97299	0.054024	0.35603	FALSE
NonTargeting_Human_0128	NonTargeting_Human_0128	365.15/357.84/199.56	127.85/122.91/300.55	357.84	127.85	-1.4776	12552	14616	1.9258	0.027064	0.97294	0.054128	0.35633	FALSE
CCDC43_4	CCDC43	407.81/421.92/503.79	170.47/101.16/418.49	421.92	170.47	-1.3024	3451.2	17233	1.9255	0.027081	0.97292	0.054163	0.35636	FALSE
KIAA1432_5	KIAA1432	94.721/342.07/368.09	41.578/118.18/606.81	342.07	118.18	-1.5254	30929	13972	1.9228	0.027254	0.97275	0.054508	0.35805	FALSE
ARPC3_14	ARPC3	110.63/0/172.07	128.89/0/14.267	110.63	14.267	-2.8703	8006.8	4518.5	1.9219	0.02731	0.97269	0.054621	0.35841	FALSE
ASH2L_13	ASH2L	112.07/199.13/255.44	35.341/444.36/41.849	199.13	41.849	-2.2236	5374.9	8133.3	1.9215	0.027332	0.97267	0.054664	0.3585	FALSE
PTAR1_14	PTAR1	125.09/373.61/311.32	71.722/326.18/99.866	311.32	99.866	-1.6306	19281	12716	1.9176	0.027579	0.97242	0.055158	0.36039	FALSE
FZD6_3	FZD6	394.79/305.59/205.77	96.669/93.599/270.11	305.59	96.669	-1.6504	8960.1	12482	1.9156	0.027709	0.97229	0.055417	0.36112	FALSE
DHRSX_6	DHRSX	344.18/394.32/455.89	127.85/153.16/210.19	394.32	153.16	-1.3586	3152.9	16106	1.9144	0.027783	0.97222	0.055566	0.36169	FALSE
CDIPT_14	CDIPT	261.02/196.17/266.09	71.722/36.872/77.04	261.02	71.722	-1.8492	2115.8	10661	1.9142	0.027797	0.9722	0.055594	0.36169	FALSE
PQBP1_4	PQBP1	225.59/629.92/493.15	283.77/222.18/203.54	493.15	222.18	-1.1467	45145	20142	1.9131	0.027866	0.97213	0.055732	0.3622	FALSE
NonTargeting_Human_0857	NonTargeting_Human_0857	72.306/220.82/251.9	51.972/40.654/75.137	220.82	51.972	-2.0661	11511	9019.1	1.9117	0.027959	0.97204	0.055919	0.36303	FALSE
PTAR1_10	PTAR1	159.8/353.9/188.92	38.46/28.363/99.866	188.92	38.46	-2.267	14033	7716.4	1.9101	0.028061	0.97194	0.056122	0.36376	FALSE
PTPMT1_5	PTPMT1	402.74/251.38/151.67	57.17/67.126/318.62	251.38	67.126	-1.8893	16427	10267	1.9089	0.028135	0.97186	0.056271	0.36415	FALSE
TRA2B_3	TRA2B	167.75/324.32/311.32	38.46/259.05/100.82	311.32	100.82	-1.617	10391	12716	1.9085	0.028165	0.97183	0.056331	0.36415	FALSE
ZBTB8OS_2	ZBTB8OS	186.55/77.877/309.55	58.209/37.818/0	186.55	37.818	-2.2725	13469	7619.5	1.9053	0.02837	0.97163	0.056739	0.36627	FALSE
SHC1_10	SHC1	233.55/223.77/39.913	54.051/236.36/21.875	223.77	54.051	-2.0296	16950	9139.9	1.9022	0.028575	0.97142	0.05715	0.36789	FALSE
PFDN2_2	PFDN2	7.9537/0/45.235	36.381/0/0	7.9537	0	-3.1625	726.57	324.86	1.9013	0.028632	0.97137	0.057264	0.36843	FALSE
DET1_7	DET1	365.15/225.75/172.07	55.091/39.709/316.72	225.75	55.091	-2.0152	11157	9220.4	1.9007	0.028671	0.97133	0.057342	0.36874	FALSE
TNFRSF8_12	TNFRSF8	311.64/480.08/238.59	101.87/137.09/50.409	311.64	101.87	-1.6037	16854	12729	1.9002	0.028701	0.9713	0.057403	0.36893	FALSE
PHKG2_12	PHKG2	336.22/451.49/283.83	468.79/117.23/74.186	336.22	117.23	-1.512	8016.1	13733	1.8982	0.028833	0.97117	0.057666	0.37004	FALSE
COX5B_11	COX5B	379.61/546.13/508.23	254.66/235.42/180.71	508.23	235.42	-1.107	8989.6	20758	1.8966	0.028942	0.97106	0.057883	0.37028	FALSE
COMMD2_9	COMMD2	172.81/15.773/179.16	33.262/12.291/138.86	172.81	33.262	-2.3428	12351	7058.4	1.8944	0.029086	0.97091	0.058171	0.37075	FALSE
ZNF263_4	ZNF263	336.95/219.83/356.56	110.18/118.18/264.41	336.95	118.18	-1.5036	7050.3	13762	1.8938	0.029125	0.97087	0.058251	0.37106	FALSE
SYTL3_7	SYTL3	154.01/704.84/426.63	301.44/142.76/177.86	426.63	177.86	-1.2575	75860	17425	1.8935	0.029149	0.97085	0.058298	0.37116	FALSE
KBTBD12_6	KBTBD12	106.29/104.49/455.01	4.1578/14.182/159.79	106.29	14.182	-2.8211	60804	4341.3	1.8916	0.029274	0.97073	0.058549	0.37218	FALSE
C16orf62_8	C16orf62	375.27/54.218/380.5	121.62/143.71/258.7	375.27	143.71	-1.3786	51550	15328	1.8877	0.029534	0.97047	0.059067	0.37353	FALSE
BMI1_9	BMI1	70.86/246.45/125.95	129.93/0/19.022	125.95	19.022	-2.6646	8777.4	5144.2	1.8862	0.029636	0.97036	0.059272	0.37424	FALSE
MED12_1	MED12	425.16/604.29/265.2	117.46/209.89/177.86	425.16	177.86	-1.2526	28837	17365	1.8856	0.029673	0.97033	0.059347	0.37452	FALSE
ZBTB37_12	ZBTB37	114.97/266.16/261.65	78.998/74.69/71.333	261.65	74.69	-1.795	10768	10687	1.8846	0.029745	0.97026	0.05949	0.37504	FALSE
ZNF143_14	ZNF143	261.02/56.19/156.1	28.065/9.4544/141.71	156.1	28.065	-2.4344	10496	6376	1.8826	0.029875	0.97013	0.059749	0.37648	FALSE
NHLRC2_5	NHLRC2	167.03/152.8/112.64	27.026/0/56.115	152.8	27.026	-2.4562	907.41	6240.9	1.8818	0.029934	0.97007	0.059867	0.37703	FALSE
CABIN1_3	CABIN1	302.96/513.6/484.28	220.36/513.38/142.67	484.28	220.36	-1.1324	16867	19780	1.8806	0.030014	0.96999	0.060028	0.3776	FALSE
UXT_6	UXT	879.96/550.07/443.48	209.97/268.51/397.56	550.07	268.51	-1.0319	60096	22467	1.8802	0.030041	0.96996	0.060082	0.3776	FALSE
STT3A_9	STT3A	97.613/257.29/368.97	72.761/156/55.164	257.29	72.761	-1.8081	18985	10509	1.8798	0.030068	0.96993	0.060135	0.37774	FALSE
C16orf62_13	C16orf62	255.24/306.58/195.13	71.722/34.981/219.71	255.24	71.722	-1.817	3124.5	10425	1.8792	0.030112	0.96989	0.060224	0.37777	FALSE
C6orf62_14	C6orf62	46.276/302.64/180.05	31.183/36.872/64.675	180.05	36.872	-2.2572	16462	7354.1	1.8785	0.030154	0.96985	0.060308	0.37777	FALSE
USP22_14	USP22	503.97/574.71/442.59	280.65/219.34/234.92	503.97	234.92	-1.0979	4386.1	20584	1.8784	0.030163	0.96984	0.060325	0.37777	FALSE
MED12_8	MED12	415.04/60.133/394.69	158/96.435/262.51	394.69	158	-1.3154	56173	16121	1.8774	0.030233	0.96977	0.060466	0.37846	FALSE
STXBP5L_13	STXBP5L	206.07/237.57/68.296	47.815/34.981/97.013	206.07	47.815	-2.0848	9987.4	8416.9	1.8765	0.030291	0.96971	0.060582	0.3788	FALSE
OSTC_9	OSTC	364.42/565.84/304.23	185.02/138.03/101.77	364.42	138.03	-1.3941	22097	14885	1.8751	0.030389	0.96961	0.060779	0.37911	FALSE
NonTargeting_Human_0546	NonTargeting_Human_0546	443.96/378.54/226.17	229.72/147.49/125.55	378.54	147.49	-1.3539	13748	15461	1.8744	0.030441	0.96956	0.060881	0.37911	FALSE
CCT6B_12	CCT6B	83.875/227.72/188.92	283.77/40.654/36.142	188.92	40.654	-2.1889	6269.9	7716.4	1.8743	0.030447	0.96955	0.060893	0.37911	FALSE
CSNK2A2_14	CSNK2A2	203.18/73.934/204	46.775/56.727/33.289	203.18	46.775	-2.0955	8352.6	8298.7	1.8731	0.03053	0.96947	0.06106	0.37964	FALSE
GAGE1_6	GAGE1	191.61/143.93/78.939	109.14/0/24.729	143.93	24.729	-2.4939	3248.6	5878.5	1.8706	0.030697	0.9693	0.061394	0.38133	FALSE
SRP19_2	SRP19	77.367/121.25/116.19	0/40.654/17.12	116.19	17.12	-2.6932	766.44	4745.7	1.8695	0.030774	0.96923	0.061547	0.38209	FALSE
SRP9_10	SRP9	373.1/343.05/473.63	205.81/0/144.57	373.1	144.57	-1.3617	5504.9	15239	1.8684	0.030851	0.96915	0.061701	0.38246	FALSE
C1GALT1_14	C1GALT1	313.81/817.22/659.89	353.41/431.12/285.33	659.89	353.41	-0.89899	72263	26953	1.8672	0.030935	0.96907	0.06187	0.38331	FALSE
DPAGT1_12	DPAGT1	100.51/0/37.252	49.893/0/3.8044	37.252	3.8044	-2.9931	2694.4	1521.5	1.8651	0.031081	0.96892	0.062162	0.38449	FALSE
DCAF4_2	DCAF4	193.78/314.47/290.92	168.39/27.418/93.208	290.92	93.208	-1.6317	4995.4	11882	1.8639	0.03117	0.96883	0.062339	0.38524	FALSE
TRIAP1_14	TRIAP1	447.57/323.34/462.1	165.27/591.85/196.88	447.57	196.88	-1.1807	7822.9	18281	1.8605	0.031406	0.96859	0.062813	0.38738	FALSE
hsa-mir-6859-1_4	hsa-mir-6859-1	28.199/69.991/39.913	4.1578/0/4.7555	39.913	4.1578	-2.9877	520.95	1630.2	1.858	0.031581	0.96842	0.063162	0.38914	FALSE
RBM4B_6	RBM4B	75.198/0/27.496	49.893/0.94544/2.8533	27.496	2.8533	-2.8866	1515.8	1123	1.8577	0.031606	0.96839	0.063212	0.38926	FALSE
HSPA8_11	HSPA8	93.275/72.948/94.904	59.248/0/12.364	93.275	12.364	-2.8185	207.91	3809.7	1.8571	0.03165	0.96835	0.0633	0.38941	FALSE
CDK12_3	CDK12	266.09/213.92/220.85	56.13/286.47/56.115	220.85	56.13	-1.9573	1047.1	9020.5	1.8561	0.03172	0.96828	0.063439	0.38987	FALSE
DDX4_4	DDX4	245.84/241.52/193.36	154.88/37.818/66.577	241.52	66.577	-1.8435	1169.1	9864.6	1.8548	0.031813	0.96819	0.063626	0.39042	FALSE
HNRNPM_2	HNRNPM	210.41/188.29/263.43	53.012/39.709/51.36	210.41	51.36	-2.0135	1650.1	8594.1	1.854	0.031867	0.96813	0.063735	0.39089	FALSE
SLC26A4_13	SLC26A4	65.075/132.1/109.98	153.84/0/16.169	109.98	16.169	-2.6925	1252.8	4492.1	1.852	0.03201	0.96799	0.064019	0.39244	FALSE
METTL17_1	METTL17	172.09/50.275/141.91	24.947/12.291/31.386	141.91	24.947	-2.4615	4654	5796.3	1.8512	0.032067	0.96793	0.064135	0.39276	FALSE
UBA3_15	UBA3	30.369/204.06/143.69	85.235/25.527/0	143.69	25.527	-2.4474	8242.9	5868.8	1.8507	0.032109	0.96789	0.064218	0.39289	FALSE
CABIN1_9	CABIN1	260.3/240.53/197.79	66.525/357.38/11.413	240.53	66.525	-1.8387	1108.8	9824.4	1.8493	0.032209	0.96779	0.064418	0.39383	FALSE
ITGA1_4	ITGA1	206.8/257.29/121.51	42.617/50.108/130.3	206.8	50.108	-2.0235	4911.4	8446.4	1.8483	0.032281	0.96772	0.064562	0.39407	FALSE
CEBPA_7	CEBPA	120.03/257.29/155.22	74.84/0/29.484	155.22	29.484	-2.3574	5828.6	6339.7	1.8472	0.032361	0.96764	0.064723	0.39477	FALSE
MRPL9_7	MRPL9	99.059/202.09/149.01	80.037/27.418/0	149.01	27.418	-2.4002	2656.1	6086.1	1.8467	0.032392	0.96761	0.064785	0.3948	FALSE
STT3A_15	STT3A	250.18/134.07/280.28	232.84/71.854/37.093	250.18	71.854	-1.7856	7193.9	10218	1.8465	0.03241	0.96759	0.064821	0.3948	FALSE
CCT8_2	CCT8	0.72306/276.02/26.609	98.747/2.8363/0	26.609	2.8363	-2.8473	31438	1086.8	1.8462	0.032434	0.96757	0.064869	0.3948	FALSE
TAF7_8	TAF7	120.03/104.49/23.948	0/15.127/38.044	104.49	15.127	-2.7096	3364.5	4268	1.8439	0.032598	0.9674	0.065196	0.39647	FALSE
MESDC2_10	MESDC2	46.999/124.21/100.23	0/14.182/39.946	100.23	14.182	-2.7372	1704.2	4093.7	1.8434	0.032635	0.96736	0.065271	0.39654	FALSE
SSX2_10	SSX2	201.73/271.09/344.14	320.15/44.436/83.697	271.09	83.697	-1.6837	5073.2	11073	1.8434	0.032636	0.96736	0.065272	0.39654	FALSE
SAFB_1	SAFB	94.721/86.749/51.443	1.0394/107.78/11.413	86.749	11.413	-2.8215	655.03	3543.2	1.8427	0.032686	0.96731	0.065372	0.39675	FALSE
STRAP_3	STRAP	254.52/130.12/367.2	62.367/74.69/361.42	254.52	74.69	-1.7552	14085	10396	1.8409	0.03282	0.96718	0.065639	0.39771	FALSE
NMT1_11	NMT1	69.414/101.54/212.87	14.552/22.691/0	101.54	14.552	-2.7209	6713.4	4147.2	1.8405	0.032846	0.96715	0.065692	0.39771	FALSE
SPINT1_10	SPINT1	151.12/136.04/0.88695	0/23.636/25.68	136.04	23.636	-2.4757	9246.7	5556.4	1.8397	0.032906	0.96709	0.065812	0.39784	FALSE
LACRT_8	LACRT	524.94/316.44/221.74	111.22/32.145/252.99	316.44	111.22	-1.5001	26221	12925	1.8394	0.032928	0.96707	0.065856	0.3979	FALSE
WRB_15	WRB	52.783/146.88/139.25	0/130.47/24.729	139.25	24.729	-2.4466	3767.5	5687.6	1.8371	0.033097	0.9669	0.066195	0.39922	FALSE
MSTO1_3	MSTO1	229.93/358.83/310.43	73.801/107.78/123.64	310.43	107.78	-1.5175	4411.1	12679	1.8366	0.033132	0.96687	0.066263	0.39938	FALSE
ZNF143_9	ZNF143	297.18/308.55/157.88	99.787/258.11/69.431	297.18	99.787	-1.5649	9766.9	12138	1.8355	0.033216	0.96678	0.066432	0.4	FALSE
NonTargeting_Human_0421	NonTargeting_Human_0421	353.58/525.42/393.81	350.29/162.62/136.96	393.81	162.62	-1.2708	9470.8	16085	1.8352	0.033239	0.96676	0.066479	0.40008	FALSE
GTF3C4_8	GTF3C4	326.1/47.318/80.713	0/32.145/10.462	80.713	10.462	-2.8337	30665	3296.7	1.834	0.033328	0.96667	0.066656	0.40073	FALSE
GLOD5_3	GLOD5	403.47/556.97/294.47	169.43/144.65/348.1	403.47	169.43	-1.2468	17722	16479	1.8339	0.033334	0.96667	0.066668	0.40073	FALSE
ATP5I_13	ATP5I	133.04/0/75.391	54.051/6.6181/9.5111	75.391	9.5111	-2.8615	4503.8	3079.3	1.8338	0.033342	0.96666	0.066684	0.40073	FALSE
CCDC101_11	CCDC101	249.46/287.85/62.974	72.761/19.854/91.306	249.46	72.761	-1.7636	18125	10189	1.8315	0.033511	0.96649	0.067023	0.40257	FALSE
RANBP1_12	RANBP1	410.7/245.46/459.44	146.56/174.91/245.39	410.7	174.91	-1.2268	14840	16775	1.8303	0.033604	0.9664	0.067208	0.4028	FALSE
hsa-mir-6770-1_6	hsa-mir-6770-1	192.33/98.579/96.678	108.1/14.182/9.5111	98.579	14.182	-2.7135	4396.8	4026.4	1.83	0.033627	0.96637	0.067253	0.4028	FALSE
RPS14_5	RPS14	7.2306/0/17.739	1.0394/74.69/0	7.2306	1.0394	-2.0128	81.355	295.33	1.8288	0.033718	0.96628	0.067435	0.4028	FALSE
SHC1_4	SHC1	191.61/311.51/182.71	48.854/0.94544/44.702	191.61	44.702	-2.0754	7227.3	7826.2	1.8284	0.033747	0.96625	0.067494	0.4028	FALSE
HTRA2_12	HTRA2	291.39/114.35/165.86	34.302/7.5635/138.86	165.86	34.302	-2.2408	9205.9	6774.5	1.828	0.033774	0.96623	0.067549	0.4028	FALSE
MED9_2	MED9	256.69/179.41/653.69	103.94/44.436/77.04	256.69	77.04	-1.7233	81790	10484	1.8278	0.033789	0.96621	0.067577	0.4028	FALSE
CHAF1B_12	CHAF1B	125.09/178.43/0	116.42/0/20.924	125.09	20.924	-2.5238	9246.2	5109.2	1.8275	0.033816	0.96618	0.067631	0.40285	FALSE
NonTargeting_Human_0181	NonTargeting_Human_0181	315.98/327.28/307.77	358.61/85.09/112.23	315.98	112.23	-1.4851	97.545	12906	1.8272	0.033833	0.96617	0.067666	0.40286	FALSE
CSNK1A1_7	CSNK1A1	294.29/378.54/205.77	156.96/93.599/98.915	294.29	98.915	-1.5633	7466.8	12020	1.8268	0.033862	0.96614	0.067725	0.40301	FALSE
SETDB1_2	SETDB1	250.18/284.89/138.36	73.801/60.508/74.186	250.18	73.801	-1.7476	6853.7	10218	1.8241	0.03407	0.96593	0.068141	0.4049	FALSE
FAM57B_5	FAM57B	105.57/173.5/150.78	29.104/0/65.626	150.78	29.104	-2.334	1280.2	6158.6	1.8237	0.034101	0.9659	0.068202	0.40506	FALSE
MED27_2	MED27	76.644/392.34/266.09	198.53/35.927/82.746	266.09	82.746	-1.6732	25915	10868	1.823	0.034151	0.96585	0.068303	0.40541	FALSE
NonTargeting_Human_0501	NonTargeting_Human_0501	240.06/148.85/246.57	88.353/25.527/68.48	240.06	68.48	-1.7947	4180.2	9804.9	1.8228	0.034164	0.96584	0.068327	0.40541	FALSE
CBWD1_13	CBWD1	112.07/324.32/275.84	75.88/349.81/88.453	275.84	88.453	-1.6299	14585	11267	1.822	0.034228	0.96577	0.068456	0.40598	FALSE
hsa-mir-1229_4	hsa-mir-1229	179.32/424.87/424.85	186.06/46.327/456.53	424.85	186.06	-1.1868	30143	17353	1.8207	0.034329	0.96567	0.068658	0.40644	FALSE
DNAJC13_13	DNAJC13	243.67/339.11/91.356	70.682/95.49/32.338	243.67	70.682	-1.7712	16154	9952.6	1.8195	0.034417	0.96558	0.068833	0.40644	FALSE
SHC1_13	SHC1	128.7/19.716/78.939	76.919/0/10.462	78.939	10.462	-2.802	2992	3224.2	1.8181	0.034523	0.96548	0.069046	0.40729	FALSE
NonTargeting_Human_0685	NonTargeting_Human_0685	24.584/135.05/41.687	65.485/0/4.7555	41.687	4.7555	-2.8908	4504.9	1702.7	1.817	0.034611	0.96539	0.069221	0.40781	FALSE
METAP1_4	METAP1	500.36/332.21/572.09	241.15/186.25/299.6	500.36	241.15	-1.0499	16709	20437	1.8161	0.034678	0.96532	0.069356	0.40814	FALSE
UBA3_8	UBA3	522.77/553.03/298.02	257.78/500.14/121.74	522.77	257.78	-1.0172	25715	21352	1.8156	0.034713	0.96529	0.069426	0.40836	FALSE
GTPBP5_14	GTPBP5	496.74/454.45/160.54	207.89/222.18/136.01	454.45	207.89	-1.1245	44086	18562	1.815	0.034758	0.96524	0.069517	0.40869	FALSE
GCFC2_6	GCFC2	14.461/72.948/48.783	71.722/0/5.7066	48.783	5.7066	-2.892	880.97	1992.5	1.8143	0.034819	0.96518	0.069638	0.40901	FALSE
EIF5A_4	EIF5A	52.783/162.65/146.35	28.065/27.418/45.653	146.35	28.065	-2.3419	4510.1	5977.5	1.8138	0.034853	0.96515	0.069705	0.40921	FALSE
CDIPT_12	CDIPT	321.04/139/218.19	58.209/14.182/180.71	218.19	58.209	-1.8883	8424.8	8911.8	1.8116	0.035024	0.96498	0.070049	0.41103	FALSE
SMNDC1_2	SMNDC1	31.815/376.57/348.57	130.97/154.11/135.06	348.57	135.06	-1.3614	50560	14237	1.8107	0.03509	0.96491	0.07018	0.41128	FALSE
C10orf53_14	C10orf53	93.998/44.36/61.2	32.223/7.5635/0	61.2	7.5635	-2.8606	679.64	2499.7	1.8107	0.035096	0.9649	0.070193	0.41128	FALSE
PGA3_8	PGA3	353.58/323.34/332.61	124.73/272.29/94.159	332.61	124.73	-1.4078	262.81	13585	1.8097	0.035169	0.96483	0.070338	0.41133	FALSE
DHX36_15	DHX36	422.99/333.2/421.3	185.02/145.6/186.42	421.3	185.02	-1.1828	3882.9	17208	1.8094	0.035197	0.9648	0.070395	0.41133	FALSE
HIST2H2BF_6	HIST2H2BF	55.676/206.03/192.47	2.0789/46.327/142.67	192.47	46.327	-2.0314	9448.2	7861.3	1.8093	0.035201	0.9648	0.070402	0.41133	FALSE
PTPMT1_6	PTPMT1	385.39/266.16/67.409	84.195/158.83/80.844	266.16	84.195	-1.6489	26859	10871	1.8078	0.035317	0.96468	0.070633	0.41208	FALSE
USP22_3	USP22	242.23/366.71/382.28	147.6/120.07/188.32	366.71	147.6	-1.3071	7869.7	14978	1.807	0.035382	0.96462	0.070763	0.41245	FALSE
NonTargeting_Human_0665	NonTargeting_Human_0665	214.75/648.65/506.45	247.39/302.54/208.29	506.45	247.39	-1.0307	52655	20686	1.8039	0.035626	0.96437	0.071251	0.41478	FALSE
TNFRSF8_5	TNFRSF8	308.75/271.09/211.1	162.15/74.69/87.502	271.09	87.502	-1.6203	2508.7	11073	1.8029	0.035702	0.9643	0.071404	0.41479	FALSE
TRIM4_4	TRIM4	283.44/289.82/498.47	345.1/58.617/98.915	289.82	98.915	-1.5414	21787	11838	1.7999	0.035935	0.96406	0.071871	0.41711	FALSE
MED20_12	MED20	159.07/256.3/333.49	48.854/79.417/105.57	256.3	79.417	-1.6779	7706.1	10469	1.7989	0.036018	0.96398	0.072035	0.4174	FALSE
IGF1R_8	IGF1R	364.42/406.14/527.74	125.77/175.85/466.99	406.14	175.85	-1.203	8262.8	16589	1.7978	0.036108	0.96389	0.072216	0.41812	FALSE
CDIPT_13	CDIPT	520.6/253.35/252.78	77.958/69.017/176.91	253.35	77.958	-1.6876	35713	10348	1.7967	0.036192	0.96381	0.072385	0.4189	FALSE
SLC35A2_14	SLC35A2	278.38/321.37/525.08	147.6/119.13/96.062	321.37	119.13	-1.4242	21673	13126	1.7949	0.036338	0.96366	0.072675	0.41978	FALSE
NonTargeting_Human_0809	NonTargeting_Human_0809	186.55/190.26/2.6609	44.696/90.762/16.169	186.55	44.696	-2.0371	16914	7619.5	1.7944	0.036371	0.96363	0.072742	0.41997	FALSE
UBE2I_15	UBE2I	344.18/695.97/212.87	134.09/122.91/228.27	344.18	134.09	-1.3534	70499	14058	1.7938	0.036422	0.96358	0.072844	0.42035	FALSE
GET4_9	GET4	345.62/362.77/445.25	146.56/246.76/128.4	362.77	146.56	-1.3017	3548.6	14817	1.7933	0.036463	0.96354	0.072926	0.42035	FALSE
EIF2B4_8	EIF2B4	130.87/258.28/284.71	81.077/197.6/60.871	258.28	81.077	-1.6594	8465.1	10549	1.7928	0.0365	0.9635	0.073	0.42036	FALSE
CTCF_15	CTCF	273.32/269.12/140.14	87.313/4.7272/264.41	269.12	87.313	-1.6129	8326.9	10992	1.7927	0.036508	0.96349	0.073016	0.42036	FALSE
CNOT2_13	CNOT2	168.47/133.08/122.4	41.578/20.8/24.729	133.08	24.729	-2.3817	683.34	5435.6	1.7916	0.036596	0.9634	0.073192	0.42089	FALSE
ARHGEF35_4	ARHGEF35	113.52/92.664/236.82	213.09/0/19.022	113.52	19.022	-2.5159	7818.5	4636.7	1.7915	0.036606	0.96339	0.073211	0.42089	FALSE
RALA_2	RALA	77.367/145.9/167.63	29.104/0/55.164	145.9	29.104	-2.2867	2584.4	5959	1.7885	0.036848	0.96315	0.073696	0.42348	FALSE
C2orf49_12	C2orf49	0/25.63/104.66	3.1183/14.182/0	25.63	3.1183	-2.6929	3451.3	1046.9	1.7855	0.037092	0.96291	0.074183	0.42547	FALSE
PIK3R4_12	PIK3R4	0.72306/139.98/109.1	48.854/10.4/18.071	109.1	18.071	-2.5293	6349.3	4455.9	1.7848	0.037148	0.96285	0.074296	0.4257	FALSE
MSTO1_15	MSTO1	60.737/326.3/180.05	31.183/42.545/113.18	180.05	42.545	-2.0558	17812	7354.1	1.7842	0.037198	0.9628	0.074396	0.4257	FALSE
NonTargeting_Human_0036	NonTargeting_Human_0036	245.12/52.247/270.52	87.313/74.69/74.186	245.12	74.69	-1.7012	18922	10012	1.782	0.037377	0.96262	0.074754	0.42734	FALSE
POLR2E_10	POLR2E	39.768/140.97/118.85	2.0789/33.09/20.924	118.85	20.924	-2.4506	3371.7	4854.4	1.7796	0.037568	0.96243	0.075136	0.42912	FALSE
MBTPS2_12	MBTPS2	52.783/0/52.33	0/93.599/6.6577	52.33	6.6577	-2.8	1369.3	2137.4	1.7791	0.03761	0.96239	0.075219	0.42914	FALSE
CDK12_15	CDK12	417.21/208/518.87	186.06/480.28/173.1	417.21	186.06	-1.1607	27051	17040	1.7788	0.037635	0.96236	0.07527	0.42914	FALSE
METAP1D_12	METAP1D	309.47/392.34/203.11	113.3/174.91/81.795	309.47	113.3	-1.4416	9090	12640	1.7785	0.037661	0.96234	0.075321	0.42914	FALSE
MRPS31_12	MRPS31	107.01/138.01/230.61	27.026/21.745/96.062	138.01	27.026	-2.3104	4767.6	5636.9	1.7755	0.037908	0.96209	0.075815	0.43119	FALSE
ALG8_9	ALG8	185.83/286.86/100.23	97.708/23.636/45.653	185.83	45.653	-2.0017	8768	7590	1.7747	0.037974	0.96203	0.075949	0.43129	FALSE
RALGAPA2_14	RALGAPA2	270.42/133.08/220.85	148.64/62.399/61.822	220.85	62.399	-1.8071	5080.6	9020.5	1.7746	0.037978	0.96202	0.075957	0.43129	FALSE
CSNK1A1_11	CSNK1A1	466.37/406.14/392.92	178.78/149.38/186.42	406.14	178.78	-1.1793	1901.2	16589	1.7746	0.037984	0.96202	0.075968	0.43129	FALSE
POLR2L_7	POLR2L	133.77/170.54/0	0/30.254/25.68	133.77	25.68	-2.3366	9622.9	5463.6	1.7744	0.037997	0.962	0.075994	0.43129	FALSE
MED20_10	MED20	328.27/82.806/264.31	86.274/98.326/55.164	264.31	86.274	-1.6041	18518	10796	1.774	0.038035	0.96196	0.07607	0.43143	FALSE
B4GALT2_2	B4GALT2	474.33/739.34/151.67	141.36/281.74/228.27	474.33	228.27	-1.0519	87170	19374	1.7716	0.03823	0.96177	0.07646	0.43294	FALSE
RBM3_12	RBM3	146.06/0/103.77	2.0789/56.727/17.12	103.77	17.12	-2.5316	6278.5	4238.6	1.7714	0.038244	0.96176	0.076487	0.43294	FALSE
GTF3C4_5	GTF3C4	248.73/234.62/205.77	66.525/69.963/155.98	234.62	69.963	-1.7313	515.61	9582.8	1.7704	0.038329	0.96167	0.076658	0.43315	FALSE
ATP13A1_8	ATP13A1	250.9/0/371.63	32.223/320.5/78.942	250.9	78.942	-1.6558	38764	10248	1.7702	0.038346	0.96165	0.076692	0.43315	FALSE
CHRNA3_14	CHRNA3	104.84/192.23/220.85	48.854/139.93/38.044	192.23	48.854	-1.9545	4227.7	7851.4	1.7699	0.038375	0.96163	0.076749	0.43322	FALSE
IPO9_12	IPO9	266.09/286.86/345.03	112.26/100.22/58.017	286.86	100.22	-1.5079	1907.2	11717	1.7689	0.038457	0.96154	0.076914	0.43364	FALSE
CHD7_5	CHD7	260.3/321.37/305.11	283.77/111.56/96.062	305.11	111.56	-1.4433	1136.1	12462	1.7688	0.038461	0.96154	0.076922	0.43364	FALSE
PLA2G10_2	PLA2G10	24.584/27.602/0	3.1183/1.8909/38.044	24.584	3.1183	-2.6351	306.74	1004.1	1.7672	0.038594	0.96141	0.077188	0.43494	FALSE
SAP130_7	SAP130	120.75/205.04/230.61	44.696/282.69/55.164	205.04	55.164	-1.8752	3879.4	8374.9	1.7661	0.038692	0.96131	0.077384	0.43564	FALSE
EIF3C_14	EIF3C	102.67/155.75/138.36	2.0789/133.31/27.582	138.36	27.582	-2.2857	788.1	5651.4	1.7658	0.038716	0.96128	0.077432	0.43571	FALSE
PPP1CB_11	PPP1CB	136.66/139.98/79.826	27.026/16.073/71.333	136.66	27.026	-2.2963	1620.5	5581.7	1.7654	0.038748	0.96125	0.077495	0.43587	FALSE
SEZ6L2_15	SEZ6L2	174.98/16.758/201.34	41.578/96.435/17.12	174.98	41.578	-2.0472	12865	7147	1.7648	0.038795	0.96121	0.07759	0.4362	FALSE
RPL28_3	RPL28	15.184/16.758/0.88695	2.0789/0.94544/106.52	15.184	2.0789	-2.3941	103.45	620.19	1.7639	0.038871	0.96113	0.077742	0.43685	FALSE
SLX4_13	SLX4	184.38/156.74/193.36	45.736/197.6/27.582	184.38	45.736	-1.9879	422.27	7530.9	1.7635	0.038908	0.96109	0.077816	0.43706	FALSE
NonTargeting_Human_0836	NonTargeting_Human_0836	5.0614/210.96/0	66.525/0.94544/0	5.0614	0.94544	-1.6396	21210	206.73	1.7613	0.039094	0.96091	0.078189	0.43798	FALSE
RICTOR_1	RICTOR	135.94/139/171.18	28.065/25.527/343.35	139	28.065	-2.268	522.66	5677.2	1.7599	0.039213	0.96079	0.078426	0.43863	FALSE
RAB7A_11	RAB7A	357.92/605.27/565.88	337.82/298.76/170.25	565.88	298.76	-0.91923	22400	23113	1.7581	0.039363	0.96064	0.078726	0.43914	FALSE
TFAM_9	TFAM	147.5/71.963/196.02	31.183/72.799/11.413	147.5	31.183	-2.2061	4030	6024.7	1.7574	0.039425	0.96057	0.078851	0.43924	FALSE
WDR55_12	WDR55	92.552/56.19/86.035	2.0789/37.818/13.315	86.035	13.315	-2.604	466.59	3514	1.7563	0.03952	0.96048	0.07904	0.43949	FALSE
SMC1A_2	SMC1A	467.1/507.68/285.6	225.56/260.94/224.46	467.1	225.56	-1.0469	17294	19078	1.7527	0.039826	0.96017	0.079651	0.44196	FALSE
PGM1_8	PGM1	147.5/460.36/330.83	129.93/195.71/104.62	330.83	129.93	-1.3417	25194	13513	1.7525	0.039843	0.96016	0.079686	0.44196	FALSE
RAB7A_8	RAB7A	292.84/314.47/313.98	140.33/119.13/104.62	313.98	119.13	-1.3907	223.62	12824	1.7508	0.039986	0.96001	0.079973	0.44276	FALSE
ABHD14B_9	ABHD14B	205.35/200.11/89.582	44.696/53.89/56.115	200.11	53.89	-1.8734	6122.4	8173.5	1.7507	0.040002	0.96	0.080003	0.44276	FALSE
CMAS_6	CMAS	58.568/199.13/143.69	30.144/67.126/21.875	143.69	30.144	-2.2159	5159.5	5868.8	1.7505	0.040013	0.95999	0.080027	0.44276	FALSE
DARS_14	DARS	111.35/91.678/121.51	54.051/19.854/0	111.35	19.854	-2.4296	245.14	4548.1	1.7501	0.040055	0.95995	0.080109	0.44276	FALSE
CREB5_9	CREB5	193.78/230.67/117.96	50.933/0/213.05	193.78	50.933	-1.9071	3554.6	7914.8	1.7499	0.040067	0.95993	0.080133	0.44276	FALSE
FURIN_15	FURIN	227.04/536.27/404.45	117.46/248.65/180.71	404.45	180.71	-1.1579	24425	16520	1.7499	0.040068	0.95993	0.080135	0.44276	FALSE
COG5_14	COG5	109.18/96.607/24.835	83.156/16.073/6.6577	96.607	16.073	-2.5153	2654.7	3945.9	1.7463	0.040382	0.95962	0.080764	0.44562	FALSE
NARF_6	NARF	146.06/239.55/167.63	124.73/39.709/35.191	167.63	39.709	-2.0505	2818.4	6846.9	1.7446	0.04053	0.95947	0.081061	0.44679	FALSE
PTAR1_1	PTAR1	340.56/330.24/253.67	99.787/130.47/215.9	330.24	130.47	-1.3331	2984.8	13488	1.7441	0.040569	0.95943	0.081138	0.44688	FALSE
SEC61B_8	SEC61B	225.59/70.977/124.17	23.907/41.599/0	124.17	23.907	-2.3293	6558.1	5071.8	1.7436	0.040615	0.95939	0.081229	0.44718	FALSE
GET4_4	GET4	426.61/277.99/236.82	62.367/97.381/175.95	277.99	97.381	-1.5038	11891	11354	1.7428	0.040682	0.95932	0.081365	0.44773	FALSE
GART_8	GART	131.6/80.835/129.5	85.235/0/25.68	129.5	25.68	-2.2902	1186.1	5289.1	1.742	0.040759	0.95924	0.081517	0.448	FALSE
KAT7_14	KAT7	206.8/199.13/140.14	54.051/42.545/78.942	199.13	54.051	-1.8621	1769.3	8133.3	1.7417	0.040778	0.95922	0.081555	0.448	FALSE
ATP5F1_5	ATP5F1	306.58/338.13/196.9	292.08/115.34/81.795	306.58	115.34	-1.4026	6511.8	12522	1.7417	0.040781	0.95922	0.081562	0.448	FALSE
NonTargeting_Human_0120	NonTargeting_Human_0120	412.87/341.08/188.03	262.98/138.03/136.96	341.08	138.03	-1.2989	14288	13931	1.741	0.04084	0.95916	0.081681	0.44825	FALSE
ABHD14B_4	ABHD14B	109.91/272.08/345.03	51.972/281.74/94.159	272.08	94.159	-1.5209	15811	11113	1.7391	0.041005	0.95899	0.082011	0.44986	FALSE
WDR61_15	WDR61	167.03/161.67/138.36	103.94/37.818/0	161.67	37.818	-2.0672	285.9	6603.3	1.7349	0.041381	0.95862	0.082762	0.4532	FALSE
DHRSX_10	DHRSX	75.921/301.65/226.17	68.603/99.271/0	226.17	68.603	-1.7066	14136	9237.9	1.7319	0.041645	0.95836	0.08329	0.45557	FALSE
HMOX2_1	HMOX2	122.92/241.52/297.13	150.72/72.799/77.04	241.52	77.04	-1.6358	8579	9864.6	1.7318	0.041657	0.95834	0.083313	0.45557	FALSE
FNTB_6	FNTB	133.04/78.863/76.278	0/205.16/12.364	78.863	12.364	-2.5791	1471.1	3221.1	1.7305	0.041767	0.95823	0.083533	0.45652	FALSE
RPUSD4_13	RPUSD4	195.23/137.02/265.2	53.012/51.999/115.08	195.23	53.012	-1.8612	4141.8	7973.9	1.7299	0.041828	0.95817	0.083656	0.45652	FALSE
HIST1H2BF_11	HIST1H2BF	134.49/105.48/63.861	29.104/18.909/0	105.48	18.909	-2.4191	1286.8	4308.2	1.7298	0.041831	0.95817	0.083661	0.45652	FALSE
CCT6B_15	CCT6B	258.86/178.43/250.12	82.116/242.98/52.311	250.12	82.116	-1.5952	2608.1	10216	1.7296	0.041847	0.95815	0.083695	0.45652	FALSE
SRP14_4	SRP14	98.336/122.24/42.574	0/17.018/18.071	98.336	17.018	-2.4629	1840.4	4016.5	1.7293	0.04188	0.95812	0.08376	0.45652	FALSE
GLOD5_15	GLOD5	265.36/381.5/369.86	159.04/259.05/83.697	369.86	159.04	-1.2125	5527.5	15107	1.7291	0.041891	0.95811	0.083783	0.45652	FALSE
GALR1_1	GALR1	27.476/224.76/386.71	133.05/68.072/57.066	224.76	68.072	-1.7086	32575	9180.1	1.7291	0.041893	0.95811	0.083786	0.45652	FALSE
NUDT21_9	NUDT21	211.86/80.835/210.21	1.0394/60.508/155.03	210.21	60.508	-1.7798	8370.1	8585.8	1.7287	0.041934	0.95807	0.083867	0.45654	FALSE
PSMD5_1	PSMD5	104.12/183.36/188.03	21.828/242.03/47.555	183.36	47.555	-1.9248	3150.1	7489.1	1.7284	0.041956	0.95804	0.083912	0.45654	FALSE
GNB1L_9	GNB1L	179.32/221.8/170.3	45.736/110.62/26.631	179.32	45.736	-1.948	943.12	7324.2	1.7284	0.041961	0.95804	0.083921	0.45654	FALSE
DNAJC4_14	DNAJC4	185.83/267.15/304.23	53.012/295.92/92.257	267.15	92.257	-1.5237	3994	10911	1.7281	0.041988	0.95801	0.083976	0.45654	FALSE
LIMS3_10	LIMS3	377.44/378.54/299.79	360.69/158.83/164.54	377.44	164.54	-1.1929	3015.1	15416	1.7272	0.042069	0.95793	0.084139	0.45707	FALSE
CSNK1A1_8	CSNK1A1	257.41/236.59/168.52	30.144/74.69/117.94	236.59	74.69	-1.6503	2533.4	9663.3	1.7271	0.042075	0.95793	0.08415	0.45707	FALSE
PFDN6_1	PFDN6	172.81/169.56/108.21	41.578/125.74/27.582	169.56	41.578	-2.0021	1887	6925.4	1.7266	0.042118	0.95788	0.084235	0.45734	FALSE
NonTargeting_Human_0590	NonTargeting_Human_0590	121.47/194.2/69.182	134.09/14.182/23.778	121.47	23.778	-2.3054	4011.7	4961.5	1.7257	0.042205	0.9578	0.084409	0.45787	FALSE
PROX1_2	PROX1	233.55/365.73/316.64	123.69/70.908/243.48	316.64	123.69	-1.349	4657	12933	1.7245	0.042313	0.95769	0.084626	0.45882	FALSE
CDIPT_9	CDIPT	171.37/294.75/137.48	1.0394/42.545/233.02	171.37	42.545	-1.9849	8186.1	6999.3	1.7235	0.042402	0.9576	0.084804	0.45916	FALSE
TAF1B_10	TAF1B	75.198/154.77/124.17	1.0394/116.29/24.729	124.17	24.729	-2.2825	1667.3	5071.8	1.7234	0.04241	0.95759	0.084819	0.45916	FALSE
SYS1_12	SYS1	178.6/250.39/42.574	45.736/133.31/0.95111	178.6	45.736	-1.9422	11828	7294.6	1.7233	0.042417	0.95758	0.084835	0.45916	FALSE
RNF151_11	RNF151	473.6/354.88/613.77	615.35/234.47/128.4	473.6	234.47	-1.0112	16871	19344	1.7229	0.042457	0.95754	0.084914	0.45938	FALSE
UBE2G2_15	UBE2G2	272.59/262.22/287.37	125.77/96.435/68.48	272.59	96.435	-1.4895	163.03	11134	1.7188	0.042829	0.95717	0.085659	0.46239	FALSE
CCZ1_11	CCZ1	256.69/131.11/251.9	56.13/84.144/352.86	251.9	84.144	-1.5706	7306	10288	1.7185	0.042854	0.95715	0.085707	0.46245	FALSE
ADAMTSL1_9	ADAMTSL1	329.72/185.33/409.77	133.05/112.51/168.35	329.72	133.05	-1.3028	13628	13467	1.7178	0.042915	0.95709	0.085829	0.4627	FALSE
GNB1L_4	GNB1L	307.3/294.75/273.18	356.53/69.017/110.33	294.75	110.33	-1.4096	311.35	12039	1.7175	0.042942	0.95706	0.085885	0.46279	FALSE
NonTargeting_Human_0527	NonTargeting_Human_0527	266.09/554.01/726.42	242.19/295.92/847.44	554.01	295.92	-0.90243	56312	22628	1.7169	0.042997	0.957	0.085994	0.46297	FALSE
SPRN_9	SPRN	12.292/139.98/198.68	0/105.89/30.435	139.98	30.435	-2.165	9875	5717.5	1.7167	0.043016	0.95698	0.086032	0.46297	FALSE
HIST2H2AA3_4	HIST2H2AA3	319.59/241.52/522.42	88.353/199.49/126.5	319.59	126.5	-1.3303	23617	13054	1.7165	0.04304	0.95696	0.08608	0.46302	FALSE
WWP1_7	WWP1	137.38/0/89.582	1.0394/51.999/15.218	89.582	15.218	-2.4817	5154.9	3658.9	1.7153	0.043145	0.95685	0.086291	0.46396	FALSE
BST2_14	BST2	174.98/278.98/317.53	100.83/95.49/307.21	278.98	100.83	-1.4592	6150.8	11395	1.7139	0.043278	0.95672	0.086556	0.46513	FALSE
SSH3_2	SSH3	113.52/176.46/24.835	21.828/17.963/71.333	113.52	21.828	-2.3267	5913	4636.7	1.7127	0.043387	0.95661	0.086774	0.46586	FALSE
ACTR3_12	ACTR3	85.321/134.07/41.687	100.83/0/14.267	85.321	14.267	-2.4993	2140.1	3484.9	1.7125	0.043399	0.9566	0.086797	0.46586	FALSE
VPS35_12	VPS35	622.56/337.14/373.41	46.775/163.56/270.11	373.41	163.56	-1.186	31695	15252	1.712	0.043446	0.95655	0.086893	0.46616	FALSE
NonTargeting_Human_0107	NonTargeting_Human_0107	486.62/911.85/332.61	572.73/245.82/202.59	486.62	245.82	-0.98233	102270	19876	1.7109	0.043546	0.95645	0.087091	0.46682	FALSE
hsa-mir-6817_11	hsa-mir-6817	190.16/239.55/82.487	96.669/51.999/30.435	190.16	51.999	-1.8508	7016.6	7767.1	1.7095	0.043675	0.95633	0.08735	0.46779	FALSE
DCAKD_15	DCAKD	110.63/288.84/176.5	45.736/0.94544/126.5	176.5	45.736	-1.9253	8479	7209.2	1.7085	0.043769	0.95623	0.087538	0.46839	FALSE
MFAP1_11	MFAP1	45.553/109.42/129.5	20.789/0/58.969	109.42	20.789	-2.3414	2241.1	4469.3	1.7077	0.043842	0.95616	0.087684	0.4686	FALSE
INPP5J_11	INPP5J	204.63/139/245.69	59.248/26.472/269.16	204.63	59.248	-1.771	2996.6	8357.8	1.7077	0.043846	0.95615	0.087692	0.4686	FALSE
MRPL9_6	MRPL9	390.45/200.11/105.55	156.96/34.036/57.066	200.11	57.066	-1.7922	22586	8173.5	1.7066	0.043953	0.95605	0.087906	0.46933	FALSE
BRICD5_5	BRICD5	421.54/236.59/480.73	198.53/413.16/177.86	421.54	198.53	-1.0825	18856	17218	1.7063	0.043978	0.95602	0.087956	0.46939	FALSE
GZF1_13	GZF1	382.5/402.2/422.19	185.02/161.67/428.95	402.2	185.02	-1.116	393.87	16428	1.7031	0.044276	0.95572	0.088552	0.47134	FALSE
PROX1_13	PROX1	163.41/191.24/214.64	53.012/185.31/37.093	191.24	53.012	-1.8316	661.07	7811.2	1.7024	0.044342	0.95566	0.088684	0.47163	FALSE
HNRNPA2B1_8	HNRNPA2B1	292.12/326.3/115.3	248.43/107.78/110.33	292.12	110.33	-1.3967	16215	11931	1.7012	0.044452	0.95555	0.088904	0.47239	FALSE
PFN1_5	PFN1	530.73/567.81/200.45	481.26/263.78/280.58	530.73	280.58	-0.91716	55228	21677	1.7006	0.044508	0.95549	0.089016	0.47269	FALSE
GATS_13	GATS	51.337/41.403/167.63	1.0394/112.51/7.6088	51.337	7.6088	-2.6039	6811.9	2096.8	1.7005	0.044519	0.95548	0.089038	0.47269	FALSE
TRIAP1_6	TRIAP1	144.61/173.5/74.504	33.262/33.09/0	144.61	33.09	-2.0947	2874.8	5906.6	1.6978	0.044777	0.95522	0.089554	0.47472	FALSE
ATP5O_9	ATP5O	133.04/87.735/114.42	167.35/22.691/3.8044	114.42	22.691	-2.2845	529.43	4673.3	1.697	0.044851	0.95515	0.089701	0.47476	FALSE
TFAM_13	TFAM	368.76/0/393.81	162.15/90.762/362.37	368.76	162.15	-1.1804	68306	15062	1.6968	0.044872	0.95513	0.089744	0.47478	FALSE
HYOU1_12	HYOU1	104.84/70.977/106.43	75.88/19.854/0	104.84	19.854	-2.3435	574.75	4282.3	1.6964	0.044903	0.9551	0.089806	0.47491	FALSE
PKD1_13	PKD1	44.107/408.12/338.82	124.73/141.82/387.1	338.82	141.82	-1.2506	45828	13839	1.6943	0.045106	0.95489	0.090211	0.47643	FALSE
POLR3H_8	POLR3H	427.33/460.36/532.17	260.9/228.8/121.74	460.36	228.8	-1.0055	3124	18803	1.6927	0.04526	0.95474	0.090521	0.47755	FALSE
KIAA1432_8	KIAA1432	193.06/367.7/295.36	113.3/162.62/63.724	295.36	113.3	-1.3745	7849.3	12064	1.6924	0.045284	0.95472	0.090568	0.47755	FALSE
PES1_8	PES1	185.1/203.07/189.81	53.012/104/6.6577	189.81	53.012	-1.8208	99.034	7752.6	1.6924	0.045286	0.95471	0.090572	0.47755	FALSE
GNB1L_6	GNB1L	519.16/310.52/791.16	273.37/295.92/178.81	519.16	273.37	-0.9228	58758	21205	1.6897	0.045545	0.95445	0.091091	0.47944	FALSE
YME1L1_13	YME1L1	135.94/39.432/251.01	27.026/30.254/59.92	135.94	30.254	-2.1314	11277	5552.2	1.6896	0.045552	0.95445	0.091103	0.47944	FALSE
STOML3_13	STOML3	97.613/301.65/211.98	64.446/0/154.08	211.98	64.446	-1.7024	10560	8658.3	1.6893	0.045578	0.95442	0.091156	0.47944	FALSE
ZNHIT1_15	ZNHIT1	107.01/4.9289/119.74	51.972/0.94544/20.924	107.01	20.924	-2.3006	5291.6	4370.9	1.6839	0.046103	0.9539	0.092206	0.48287	FALSE
COMMD3_14	COMMD3	86.044/132.1/26.609	2.0789/97.381/15.218	86.044	15.218	-2.4242	2826.7	3514.4	1.6834	0.04615	0.95385	0.0923	0.48287	FALSE
SLC26A4_7	SLC26A4	53.506/337.14/224.4	71.722/93.599/0	224.4	71.722	-1.632	20957	9165.4	1.682	0.046282	0.95372	0.092564	0.48344	FALSE
COG5_4	COG5	132.32/131.11/213.76	0/29.309/75.137	132.32	29.309	-2.1371	3316.6	5404.5	1.6818	0.046299	0.9537	0.092599	0.48344	FALSE
PROX1_1	PROX1	358.64/205.04/384.94	40.538/235.42/156.93	358.64	156.93	-1.1872	12141	14648	1.6813	0.046348	0.95365	0.092696	0.48344	FALSE
SRP14_12	SRP14	293.56/217.86/417.76	113.3/0/138.86	293.56	113.3	-1.3658	10577	11990	1.6812	0.046357	0.95364	0.092715	0.48344	FALSE
ARGLU1_12	ARGLU1	161.97/218.84/194.24	45.736/105.89/56.115	194.24	56.115	-1.7733	823.54	7933.7	1.6792	0.046559	0.95344	0.093119	0.4838	FALSE
EXT1_1	EXT1	248.73/123.22/236.82	144.48/51.054/78.942	236.82	78.942	-1.5728	6522.7	9672.6	1.679	0.046571	0.95343	0.093143	0.4838	FALSE
KAT7_2	KAT7	120.75/581.61/376.07	169.43/225.02/40.898	376.07	169.43	-1.1457	53718	15360	1.679	0.046579	0.95342	0.093157	0.4838	FALSE
INPP5J_10	INPP5J	516.99/591.47/467.43	273.37/110.62/350.01	516.99	273.37	-0.91677	4002.2	21116	1.6783	0.046645	0.95336	0.093289	0.48403	FALSE
MED26_11	MED26	141.72/175.47/0.88695	5.1972/33.09/252.04	141.72	33.09	-2.0657	10487	5788.4	1.6758	0.04689	0.95311	0.093781	0.48582	FALSE
DDX52_4	DDX52	43.384/11.829/49.669	2.0789/168.29/6.6577	43.384	6.6577	-2.535	517.59	1772	1.6719	0.047275	0.95272	0.09455	0.48806	FALSE
GTF3C4_1	GTF3C4	108.46/31.545/112.64	28.065/0.94544/21.875	108.46	21.875	-2.2585	2966.6	4429.9	1.6696	0.047502	0.9525	0.095005	0.48981	FALSE
MARS2_11	MARS2	0/72.948/228.83	12.473/0/188.32	72.948	12.473	-2.4564	14811	2979.5	1.669	0.047559	0.95244	0.095118	0.48984	FALSE
WRB_14	WRB	203.9/213.92/251.9	208.93/67.126/35.191	213.92	67.126	-1.6575	771.34	8737.2	1.6682	0.047635	0.95236	0.09527	0.49021	FALSE
PDRG1_6	PDRG1	125.09/142.94/31.93	193.34/27.418/11.413	125.09	27.418	-2.1496	4498.6	5109.2	1.667	0.047756	0.95224	0.095511	0.49062	FALSE
EIF3F_3	EIF3F	136.66/187.3/148.12	0/225.02/36.142	148.12	36.142	-2.0054	833.17	6049.9	1.6655	0.047909	0.95209	0.095818	0.49158	FALSE
RALB_11	RALB	218.36/13.801/201.34	187.1/52.945/60.871	201.34	60.871	-1.7094	17730	8223.5	1.6633	0.048126	0.95187	0.096252	0.49318	FALSE
UBE2I_11	UBE2I	46.276/130.12/0.88695	7.2761/0/74.186	46.276	7.2761	-2.5141	4545.3	1890.1	1.6626	0.048194	0.95181	0.096388	0.49352	FALSE
PACRGL_5	PACRGL	248.73/361.78/146.35	201.65/72.799/87.502	248.73	87.502	-1.4966	11632	10159	1.6608	0.048372	0.95163	0.096744	0.49446	FALSE
GET4_6	GET4	323.93/255.32/250.12	91.471/0/146.47	255.32	91.471	-1.4709	2367.3	10428	1.6606	0.048399	0.9516	0.096798	0.49452	FALSE
ORMDL1_6	ORMDL1	104.12/152.8/20.4	81.077/0/20.924	104.12	20.924	-2.2614	4689.3	4252.7	1.6594	0.048522	0.95148	0.097044	0.49495	FALSE
SRP14_3	SRP14	235.72/166.6/269.63	80.037/101.16/41.849	235.72	80.037	-1.5465	2963.9	9627.7	1.6591	0.048549	0.95145	0.097099	0.49503	FALSE
COPS6_8	COPS6	117.14/231.66/169.41	179.82/23.636/45.653	169.41	45.653	-1.869	3303.8	6919.4	1.6588	0.048575	0.95143	0.097149	0.49508	FALSE
NXPH2_10	NXPH2	449.02/436.7/313.09	246.35/166.4/215.9	436.7	215.9	-1.0129	7715.4	17837	1.6583	0.048625	0.95137	0.097251	0.49539	FALSE
METTL17_3	METTL17	99.059/84.778/46.122	15.592/75.635/0	84.778	15.592	-2.3701	849.13	3462.7	1.658	0.048656	0.95134	0.097312	0.49549	FALSE
SRP19_10	SRP19	199.56/148.85/52.33	125.77/36.872/0	148.85	36.872	-1.9843	5944.2	6079.8	1.6574	0.048721	0.95128	0.097442	0.49579	FALSE
GTF2H3_1	GTF2H3	78.091/204.06/151.67	171.51/21.745/38.044	151.67	38.044	-1.9672	4079.2	6194.8	1.6571	0.048746	0.95125	0.097492	0.49579	FALSE
MAOB_4	MAOB	124.37/249.4/287.37	72.761/104.94/88.453	249.4	88.453	-1.4851	8538.1	10187	1.6548	0.048985	0.95102	0.09797	0.49718	FALSE
COPS8_8	COPS8	49.168/260.25/175.62	48.854/269.45/47.555	175.62	48.854	-1.8248	11576	7172.9	1.6536	0.049108	0.95089	0.098216	0.49739	FALSE
METAP1D_10	METAP1D	59.291/208/165.86	189.18/44.436/15.218	165.86	44.436	-1.8767	6566.5	6774.5	1.6526	0.049206	0.95079	0.098411	0.49797	FALSE
DNAJC17_10	DNAJC17	0/177.44/66.522	11.434/0.94544/60.871	66.522	11.434	-2.4411	8364.2	2717	1.6514	0.049329	0.95067	0.098657	0.49883	FALSE
KAT8_8	KAT8	439.62/550.07/528.62	294.16/212.72/286.28	528.62	286.28	-0.8825	4190.8	21591	1.6508	0.049394	0.95061	0.098789	0.49883	FALSE
NonTargeting_Human_0808	NonTargeting_Human_0808	324.65/165.61/299.79	120.58/317.67/77.04	299.79	120.58	-1.3069	9311	12245	1.6501	0.049457	0.95054	0.098914	0.49883	FALSE
PHF3_14	PHF3	189.44/212.93/0	142.4/55.781/6.6577	189.44	55.781	-1.7459	18220	7737.6	1.6501	0.049457	0.95054	0.098915	0.49883	FALSE
ALG8_2	ALG8	188/94.636/161.43	42.617/98.326/0.95111	161.43	42.617	-1.8968	2583.4	6593.3	1.6501	0.049463	0.95054	0.098926	0.49883	FALSE
ZBTB37_14	ZBTB37	146.78/94.636/127.72	29.104/3.7818/58.969	127.72	29.104	-2.0962	728.98	5216.7	1.65	0.049469	0.95053	0.098939	0.49883	FALSE
WDR82_5	WDR82	252.35/203.07/202.23	156.96/37.818/62.773	203.07	62.773	-1.6781	1214.4	8294.3	1.65	0.049474	0.95053	0.098948	0.49883	FALSE
DYRK1A_11	DYRK1A	78.091/0/111.76	16.631/14.182/0	78.091	14.182	-2.3812	3615.8	3189.6	1.6481	0.049664	0.95034	0.099329	0.49974	FALSE
DCAKD_6	DCAKD	189.44/240.53/83.374	109.14/37.818/56.115	189.44	56.115	-1.7374	6930.3	7737.6	1.6454	0.049944	0.95006	0.099888	0.5015	FALSE
HSPE1_10	HSPE1	101.95/7.8863/110.87	20.789/18.909/23.778	101.95	20.789	-2.2403	4463.9	4164.1	1.6445	0.050032	0.94997	0.10006	0.50218	FALSE
HIST2H3A_2	HIST2H3A	50.614/69.991/98.452	40.538/0/12.364	69.991	12.364	-2.4092	592.74	2858.7	1.6441	0.050073	0.94993	0.10015	0.50238	FALSE
NonTargeting_Human_0683	NonTargeting_Human_0683	287.78/134.07/388.49	356.53/113.45/89.404	287.78	113.45	-1.3352	16885	11754	1.6434	0.050153	0.94985	0.10031	0.50289	FALSE
PAGE4_14	PAGE4	216.2/465.29/261.65	287.93/90.762/97.013	261.65	97.013	-1.4221	21768	10687	1.6427	0.050225	0.94978	0.10045	0.50328	FALSE
CLK2_8	CLK2	116.41/215.89/251.9	145.52/11.345/70.382	215.89	70.382	-1.6033	5595.9	8817.8	1.6408	0.050418	0.94958	0.10084	0.50459	FALSE
GNB2L1_15	GNB2L1	53.506/334.18/222.63	57.17/111.56/74.186	222.63	74.186	-1.5725	20523	9093	1.6401	0.050488	0.94951	0.10098	0.50495	FALSE
HIST2H3A_1	HIST2H3A	391.9/179.41/390.26	181.9/184.36/270.11	390.26	184.36	-1.0778	22230	15940	1.6399	0.050515	0.94948	0.10103	0.50495	FALSE
DNAL4_9	DNAL4	242.23/220.82/118.85	171.51/1.8909/73.235	220.82	73.235	-1.5792	5427.6	9019.1	1.6394	0.050568	0.94943	0.10114	0.50516	FALSE
GIGYF2_8	GIGYF2	259.58/453.46/243.91	212.05/28.363/96.062	259.58	96.062	-1.4247	18918	10602	1.6392	0.050583	0.94942	0.10117	0.50516	FALSE
JAK1_9	JAK1	352.85/434.73/318.42	158/151.27/206.39	352.85	158	-1.1542	3945	14412	1.6379	0.050718	0.94928	0.10144	0.50564	FALSE
COG2_7	COG2	143.89/202.09/117.96	162.15/35.927/26.631	143.89	35.927	-1.9722	2029.5	5877	1.6372	0.050796	0.9492	0.10159	0.50609	FALSE
OLR1_4	OLR1	82.429/101.54/54.104	15.592/326.18/8.56	82.429	15.592	-2.3301	583.69	3366.7	1.636	0.050924	0.94908	0.10185	0.50716	FALSE
MLLT11_12	MLLT11	142.44/369.67/235.93	113.3/82.253/65.626	235.93	82.253	-1.5089	13313	9636.4	1.635	0.051027	0.94897	0.10205	0.50762	FALSE
GYG2_7	GYG2	255.24/227.72/24.835	118.5/77.526/42.8	227.72	77.526	-1.5423	20959	9300.9	1.6347	0.051053	0.94895	0.10211	0.50762	FALSE
NUDT17_13	NUDT17	291.39/227.72/61.2	77.958/77.526/40.898	227.72	77.526	-1.5423	15891	9300.9	1.6347	0.051053	0.94895	0.10211	0.50762	FALSE
SNX1_13	SNX1	154.73/187.3/17.739	193.34/40.654/33.289	154.73	40.654	-1.9026	9914.2	6320	1.6337	0.051159	0.94884	0.10232	0.50846	FALSE
NonTargeting_Human_0881	NonTargeting_Human_0881	217.64/99.565/216.42	344.06/0.94544/71.333	216.42	71.333	-1.5877	6828	8839.4	1.6326	0.051273	0.94873	0.10255	0.50939	FALSE
SQLE_4	SQLE	229.93/293.76/304.23	118.5/153.16/47.555	293.76	118.5	-1.3026	2091.9	11999	1.6322	0.051319	0.94868	0.10264	0.50964	FALSE
NonTargeting_Human_0388	NonTargeting_Human_0388	427.33/613.16/315.76	375.24/212.72/189.27	427.33	212.72	-1.003	23491	17454	1.6298	0.051568	0.94843	0.10314	0.51175	FALSE
ZBTB37_8	ZBTB37	75.198/125.2/136.59	29.104/167.34/0	125.2	29.104	-2.0676	1314.8	5113.5	1.6297	0.051583	0.94842	0.10317	0.51175	FALSE
GIGYF2_5	GIGYF2	135.94/416/534.83	247.39/131.42/204.49	416	204.49	-1.021	46279	16991	1.629	0.05166	0.94834	0.10332	0.51178	FALSE
EPAS1_7	EPAS1	438.9/453.46/459.44	228.68/232.58/306.26	453.46	232.58	-0.96025	123.94	18521	1.6269	0.051883	0.94812	0.10377	0.51377	FALSE
PTPMT1_7	PTPMT1	304.41/139.98/168.52	1.0394/47.272/68.48	168.52	47.272	-1.8122	9639.9	6883.1	1.6265	0.051926	0.94807	0.10385	0.514	FALSE
PAM16_6	PAM16	255.96/479.09/797.37	509.33/222.18/252.04	479.09	252.04	-0.92393	75544	19568	1.6258	0.051992	0.94801	0.10398	0.51444	FALSE
COPS8_14	COPS8	135.21/79.849/26.609	35.341/0.94544/15.218	79.849	15.218	-2.3177	2949.8	3261.4	1.6251	0.052066	0.94793	0.10413	0.51458	FALSE
TBC1D22A_4	TBC1D22A	239.33/201.1/227.95	47.815/78.472/136.96	227.95	78.472	-1.5265	425.19	9310.3	1.6251	0.052069	0.94793	0.10414	0.51458	FALSE
TAF10_7	TAF10	262.47/172.51/300.68	54.051/99.271/333.84	262.47	99.271	-1.3937	4776.1	10720	1.6243	0.05216	0.94784	0.10432	0.51506	FALSE
C2orf49_3	C2orf49	208.96/377.56/210.21	68.603/251.49/45.653	210.21	68.603	-1.6014	14004	8585.8	1.624	0.05219	0.94781	0.10438	0.51515	FALSE
KAT7_9	KAT7	134.49/247.43/368.97	90.432/65.236/104.62	247.43	90.432	-1.4421	13764	10106	1.62	0.052617	0.94738	0.10523	0.5179	FALSE
NonTargeting_Human_0591	NonTargeting_Human_0591	286.33/330.24/114.42	152.8/104/115.08	286.33	115.08	-1.3076	15741	11695	1.6182	0.052813	0.94719	0.10563	0.51854	FALSE
TBX1_14	TBX1	234.27/239.55/120.63	40.538/169.23/82.746	234.27	82.746	-1.4902	6471.6	9568.7	1.6182	0.052815	0.94719	0.10563	0.51854	FALSE
RCC1_6	RCC1	34.707/140.97/108.21	70.682/0/23.778	108.21	23.778	-2.14	3237.8	4419.7	1.6165	0.052988	0.94701	0.10598	0.51946	FALSE
TBC1D25_15	TBC1D25	278.38/320.38/145.46	110.18/235.42/97.013	278.38	110.18	-1.3293	9715.7	11370	1.6157	0.053076	0.94692	0.10615	0.52011	FALSE
GINS2_5	GINS2	122.2/163.64/187.15	45.736/181.52/7.6088	163.64	45.736	-1.8167	1135.1	6683.8	1.6149	0.053167	0.94683	0.10633	0.52061	FALSE
CHP1_12	CHP1	219.81/618.09/495.81	145.52/287.41/266.31	495.81	266.31	-0.89418	45564	20251	1.6149	0.05317	0.94683	0.10634	0.52061	FALSE
TNFRSF4_2	TNFRSF4	242.95/287.85/259.88	98.747/69.963/466.99	259.88	98.747	-1.387	534.53	10615	1.6128	0.053397	0.9466	0.10679	0.5225	FALSE
hsa-mir-6511a-4_6	hsa-mir-6511a-4	166.3/82.806/158.76	15.592/67.126/43.751	158.76	43.751	-1.836	2913.3	6484.6	1.6111	0.053582	0.94642	0.10716	0.5236	FALSE
PHF3_5	PHF3	73.029/230.67/248.35	53.012/81.308/150.27	230.67	81.308	-1.493	12582	9421.7	1.6104	0.053654	0.94635	0.10731	0.52409	FALSE
VPS29_1	VPS29	281.99/47.318/184.49	56.13/0/188.32	184.49	56.13	-1.699	14161	7535.2	1.6097	0.053735	0.94626	0.10747	0.52428	FALSE
PIK3C3_12	PIK3C3	22.415/90.692/88.695	120.58/1.8909/18.071	88.695	18.071	-2.2337	2198.6	3622.7	1.609	0.053812	0.94619	0.10762	0.52444	FALSE
NonTargeting_Human_0814	NonTargeting_Human_0814	264.64/286.86/264.31	74.84/102.11/166.44	264.64	102.11	-1.3653	247.01	10809	1.6088	0.053826	0.94617	0.10765	0.52444	FALSE
NonTargeting_Human_0439	NonTargeting_Human_0439	710.77/1200.7/1137.1	1088.3/790.39/728.55	1137.1	790.39	-0.52414	92892	46443	1.6087	0.053841	0.94616	0.10768	0.52444	FALSE
SNAPC3_15	SNAPC3	261.02/461.35/426.63	215.17/193.82/234.92	426.63	215.17	-0.98421	14315	17425	1.6072	0.054006	0.94599	0.10801	0.52563	FALSE
NonTargeting_Human_0980	NonTargeting_Human_0980	153.29/174.48/62.087	30.144/41.599/311.96	153.29	41.599	-1.8567	4383.5	6261	1.6062	0.054114	0.94589	0.10823	0.52605	FALSE
PPP1CB_15	PPP1CB	188.72/175.47/118.85	51.972/11.345/378.54	175.47	51.972	-1.7361	1690.6	7167	1.605	0.054248	0.94575	0.1085	0.52651	FALSE
STT3A_14	STT3A	179.32/315.45/144.57	22.868/53.89/120.79	179.32	53.89	-1.7159	9869.7	7324.2	1.6046	0.054286	0.94571	0.10857	0.52668	FALSE
CSNK2A2_4	CSNK2A2	140.27/0/87.809	37.42/17.963/1.9022	87.809	17.963	-2.2275	5231.5	3586.5	1.6042	0.054332	0.94567	0.10866	0.52691	FALSE
ATP13A1_2	ATP13A1	90.383/123.22/80.713	18.71/3.7818/116.99	90.383	18.71	-2.213	586.01	3691.6	1.604	0.054362	0.94564	0.10872	0.52695	FALSE
VPS72_1	VPS72	26.753/212.93/266.97	71.722/350.76/6.6577	212.93	71.722	-1.5567	18791	8697	1.6037	0.054392	0.94561	0.10878	0.52695	FALSE
KCNK4_2	KCNK4	374.55/299.68/201.34	230.76/77.526/125.55	299.68	125.55	-1.2486	7637.9	12240	1.6022	0.054558	0.94544	0.10912	0.52756	FALSE
CCT6B_14	CCT6B	155.46/286.86/14.191	53.012/0.94544/42.8	155.46	42.8	-1.8368	18612	6349.6	1.6021	0.054569	0.94543	0.10914	0.52756	FALSE
SULT1A2_10	SULT1A2	204.63/188.29/82.487	32.223/58.617/200.68	188.29	58.617	-1.6668	5730.2	7690.4	1.6019	0.054593	0.94541	0.10919	0.52756	FALSE
GPBP1L1_10	GPBP1L1	151.12/206.03/1.7739	77.958/17.963/40.898	151.12	40.898	-1.8603	12660	6172.4	1.6019	0.054593	0.94541	0.10919	0.52756	FALSE
CDC73_13	CDC73	41.214/342.07/306	129.93/227.85/127.45	306	129.93	-1.2294	35706	12498	1.6008	0.054709	0.94529	0.10942	0.52785	FALSE
CTDP1_12	CTDP1	124.37/269.12/16.852	30.144/182.47/0	124.37	30.144	-2.0091	16256	5079.7	1.6	0.054805	0.9452	0.10961	0.5285	FALSE
CDC73_4	CDC73	31.092/191.24/177.39	73.801/24.582/53.262	177.39	53.262	-1.717	10798	7245.4	1.5998	0.05482	0.94518	0.10964	0.5285	FALSE
PIM2_4	PIM2	414.31/299.68/350.35	225.56/155.05/160.74	350.35	160.74	-1.1192	3329.5	14310	1.5994	0.054868	0.94513	0.10974	0.52875	FALSE
hsa-mir-6831_1	hsa-mir-6831	326.1/242.5/135.7	89.392/450.98/34.24	242.5	89.392	-1.4297	9197.3	9904.9	1.5985	0.054965	0.94503	0.10993	0.52927	FALSE
NXF5_4	NXF5	145.34/300.67/397.36	17.671/126.69/170.25	300.67	126.69	-1.2403	16738	12280	1.5976	0.055066	0.94493	0.11013	0.52976	FALSE
NonTargeting_Human_0286	NonTargeting_Human_0286	154.01/454.45/343.25	129.93/156/333.84	343.25	156	-1.1327	24088	14020	1.5971	0.055118	0.94488	0.11024	0.52976	FALSE
NonTargeting_Human_0170	NonTargeting_Human_0170	126.54/233.63/139.25	33.262/112.51/36.142	139.25	36.142	-1.9169	4534.6	5687.6	1.5968	0.055154	0.94485	0.11031	0.52976	FALSE
STXBP5L_12	STXBP5L	173.53/115.34/47.896	27.026/198.54/19.022	115.34	27.026	-2.0535	3967.7	4710.9	1.5961	0.055232	0.94477	0.11046	0.52992	FALSE
RPS14_13	RPS14	51.337/195.19/124.17	39.499/30.254/0	124.17	30.254	-2.0018	5173.9	5071.8	1.5959	0.05525	0.94475	0.1105	0.52992	FALSE
ANKRD36_1	ANKRD36	30.369/84.778/61.2	3.1183/167.34/11.413	61.2	11.413	-2.325	753.24	2499.7	1.5953	0.055324	0.94468	0.11065	0.53042	FALSE
CAB39_15	CAB39	305.85/51.261/227.95	81.077/139.93/43.751	227.95	81.077	-1.48	18644	9310.3	1.5945	0.055413	0.94459	0.11083	0.53077	FALSE
COMMD2_5	COMMD2	331.88/201.1/405.34	85.235/182.47/148.37	331.88	148.37	-1.1561	11250	13556	1.5943	0.055431	0.94457	0.11086	0.53077	FALSE
CPSF4_12	CPSF4	0/106.47/65.635	12.473/0/25.68	65.635	12.473	-2.3062	2987.5	2680.8	1.5938	0.055495	0.9445	0.11099	0.53102	FALSE
ZBTB10_9	ZBTB10	368.04/430.79/109.1	258.82/81.308/174.05	368.04	174.05	-1.076	35494	15032	1.5934	0.055536	0.94446	0.11107	0.53121	FALSE
WARS_9	WARS	181.49/380.51/134.82	41.578/55.781/181.66	181.49	55.781	-1.6843	20895	7412.8	1.5929	0.055593	0.94441	0.11119	0.53133	FALSE
MSTO1_14	MSTO1	78.814/209.97/121.51	49.893/21.745/29.484	121.51	29.484	-2.0068	4824.2	4963.1	1.591	0.055804	0.9442	0.11161	0.53253	FALSE
RPL41_5	RPL41	49.891/47.318/0	123.69/0/8.56	47.318	8.56	-2.3375	1122.8	1932.7	1.5894	0.05599	0.94401	0.11198	0.53274	FALSE
DYRK1A_10	DYRK1A	464.93/573.73/403.56	246.35/254.32/229.22	464.93	246.35	-0.91356	7801.5	18990	1.5893	0.056	0.944	0.112	0.53274	FALSE
STRAP_9	STRAP	263.19/177.44/258.1	137.21/17.963/99.866	258.1	99.866	-1.3611	3266.1	10542	1.5893	0.056002	0.944	0.112	0.53274	FALSE
POLR3H_2	POLR3H	8.6767/75.906/224.4	63.406/0/15.218	75.906	15.218	-2.2455	13285	3100.3	1.5863	0.056335	0.94367	0.11267	0.53507	FALSE
AGPAT6_13	AGPAT6	258.13/542.18/137.48	64.446/100.22/148.37	258.13	100.22	-1.3562	47621	10543	1.5857	0.056399	0.9436	0.1128	0.53548	FALSE
HSPA8_3	HSPA8	107.01/154.77/71.843	1.0394/24.582/63.724	107.01	24.582	-2.078	1758.8	4370.9	1.5853	0.056446	0.94355	0.11289	0.53559	FALSE
NDNL2_1	NDNL2	104.12/186.31/43.461	0/23.636/146.47	104.12	23.636	-2.0932	5217.7	4252.7	1.5848	0.056511	0.94349	0.11302	0.53559	FALSE
TSPAN11_15	TSPAN11	511.93/257.29/202.23	99.787/3.7818/187.37	257.29	99.787	-1.3577	33936	10509	1.5847	0.056518	0.94348	0.11304	0.53559	FALSE
DAZ1_7	DAZ1	206.8/460.36/404.45	201.65/324.29/192.12	404.45	201.65	-1.0005	21097	16520	1.5847	0.056521	0.94348	0.11304	0.53559	FALSE
TMEM253_6	TMEM253	250.18/725.54/444.36	246.35/231.63/167.39	444.36	231.63	-0.93693	58384	18150	1.5831	0.056704	0.9433	0.11341	0.53673	FALSE
DYNLL1_10	DYNLL1	215.47/210.96/164.09	226.6/1.8909/72.284	210.96	72.284	-1.5322	1108.7	8616.4	1.5829	0.056726	0.94327	0.11345	0.53673	FALSE
GFER_12	GFER	265.36/356.86/376.07	137.21/177.74/167.39	356.86	167.39	-1.0875	4370	14575	1.5821	0.056818	0.94318	0.11364	0.53715	FALSE
HNF4A_11	HNF4A	220.53/38.446/231.5	77.958/78.472/56.115	220.53	77.958	-1.4884	16638	9007.5	1.5803	0.057019	0.94298	0.11404	0.53801	FALSE
GPN3_1	GPN3	0/87.735/102	18.71/46.327/0	87.735	18.71	-2.1706	3950.5	3583.5	1.5792	0.057144	0.94286	0.11429	0.53877	FALSE
AGAP4_14	AGAP4	39.045/87.735/142.8	18.71/79.417/17.12	87.735	18.71	-2.1706	2701.4	3583.5	1.5792	0.057144	0.94286	0.11429	0.53877	FALSE
ATP6V1H_7	ATP6V1H	91.106/99.565/44.348	19.749/51.054/0	91.106	19.749	-2.1502	1128.9	3721.1	1.5781	0.057273	0.94273	0.11455	0.53916	FALSE
SPNS1_15	SPNS1	229.93/79.849/121.51	30.144/0/198.78	121.51	30.144	-1.9759	6745.4	4963.1	1.5763	0.057476	0.94252	0.11495	0.54082	FALSE
DNAJC4_3	DNAJC4	151.84/60.133/191.58	67.564/34.981/42.8	151.84	42.8	-1.8031	4994.9	6201.9	1.5742	0.057715	0.94228	0.11543	0.54082	FALSE
KTI12_1	KTI12	327.55/245.46/84.261	93.55/97.381/19.973	245.46	93.55	-1.3822	16362	10026	1.5726	0.057911	0.94209	0.11582	0.54223	FALSE
SAP130_1	SAP130	277.66/358.83/197.79	141.36/17.018/114.13	277.66	114.13	-1.2752	6483.6	11341	1.5715	0.058028	0.94197	0.11606	0.54312	FALSE
BAGE2_7	BAGE2	423.71/124.21/448.8	352.37/201.38/217.8	423.71	217.8	-0.95686	45166	17306	1.5704	0.058163	0.94184	0.11633	0.54376	FALSE
B4GALT2_15	B4GALT2	169.2/263.21/298.02	288.97/104.94/18.071	263.21	104.94	-1.3184	5024.8	10750	1.5699	0.058216	0.94178	0.11643	0.54395	FALSE
PACRGL_9	PACRGL	155.46/54.218/302.45	30.144/54.836/44.702	155.46	44.702	-1.7754	15928	6349.6	1.5698	0.058228	0.94177	0.11646	0.54395	FALSE
SEC61B_14	SEC61B	344.9/331.22/57.652	150.72/78.472/202.59	331.22	150.72	-1.1308	37515	13529	1.5695	0.05827	0.94173	0.11654	0.54414	FALSE
STT3A_2	STT3A	165.58/228.7/405.34	145.52/72.799/83.697	228.7	83.697	-1.4394	17592	9341.2	1.5691	0.058307	0.94169	0.11661	0.54427	FALSE
SQLE_7	SQLE	46.276/171.53/144.57	96.669/0/39.946	144.57	39.946	-1.8299	5194.5	5905	1.5678	0.058462	0.94154	0.11692	0.54493	FALSE
INPP5J_14	INPP5J	272.59/423.89/265.2	111.22/68.072/147.42	272.59	111.22	-1.2857	11472	11134	1.5676	0.058483	0.94152	0.11697	0.54493	FALSE
CPSF4_14	CPSF4	250.18/330.24/400.02	308.72/106.83/150.27	330.24	150.27	-1.1307	5639.3	13488	1.5673	0.058524	0.94148	0.11705	0.54493	FALSE
CHP1_10	CHP1	151.12/425.86/344.14	160.07/154.11/309.11	344.14	160.07	-1.0994	21967	14056	1.5673	0.058528	0.94147	0.11706	0.54493	FALSE
WBSCR16_7	WBSCR16	83.875/126.18/66.522	68.603/17.963/9.5111	83.875	17.963	-2.1621	1045.5	3425.8	1.5668	0.058581	0.94142	0.11716	0.54493	FALSE
PQBP1_3	PQBP1	118.58/139.98/21.287	120.58/20.8/29.484	118.58	29.484	-1.9719	4962.1	4843.4	1.5665	0.058621	0.94138	0.11724	0.54493	FALSE
MGEA5_11	MGEA5	324.65/107.45/231.5	63.406/219.34/85.6	231.5	85.6	-1.4248	12033	9455.3	1.5664	0.058623	0.94138	0.11725	0.54493	FALSE
SMC1A_14	SMC1A	240.06/115.34/231.5	0/215.56/85.6	231.5	85.6	-1.4248	6783	9455.3	1.5664	0.058623	0.94138	0.11725	0.54493	FALSE
ARFRP1_11	ARFRP1	159.07/84.778/294.47	166.31/23.636/46.604	159.07	46.604	-1.7496	11926	6497.2	1.5661	0.058662	0.94134	0.11732	0.54509	FALSE
USO1_8	USO1	15.907/125.2/93.13	20.789/26.472/0	93.13	20.789	-2.1111	3495.8	3803.8	1.5655	0.058738	0.94126	0.11748	0.54559	FALSE
HNF4A_5	HNF4A	390.45/322.35/797.37	119.54/193.82/256.8	390.45	193.82	-1.0067	85111	15948	1.565	0.058788	0.94121	0.11758	0.54561	FALSE
WDR55_7	WDR55	54.953/180.4/218.19	57.17/50.108/91.306	180.4	57.17	-1.6408	8582.5	7368.3	1.5648	0.058811	0.94119	0.11762	0.54561	FALSE
CSNK1A1_6	CSNK1A1	266.81/299.68/127.72	235.95/107.78/40.898	266.81	107.78	-1.2998	10213	10898	1.5645	0.058846	0.94115	0.11769	0.54561	FALSE
EMC6_7	EMC6	67.968/325.31/307.77	155.92/51.054/135.06	307.77	135.06	-1.1823	28907	12571	1.5643	0.058876	0.94112	0.11775	0.54561	FALSE
SPI1_5	SPI1	258.13/420.93/303.34	127.85/351.7/132.2	303.34	132.2	-1.192	7935.8	12390	1.5627	0.059065	0.94094	0.11813	0.54695	FALSE
GNB1L_3	GNB1L	525.67/346.01/514.43	279.61/296.87/288.19	514.43	288.19	-0.83379	14246	21012	1.5624	0.0591	0.9409	0.1182	0.54707	FALSE
CPM_8	CPM	0/132.1/130.38	34.302/0/57.066	130.38	34.302	-1.896	8501.2	5325.4	1.5617	0.059177	0.94082	0.11835	0.54724	FALSE
SP140_5	SP140	76.644/7.8863/192.47	0/16.073/39.946	76.644	16.073	-2.1852	9071.5	3130.5	1.5617	0.05918	0.94082	0.11836	0.54724	FALSE
PITPNM2_9	PITPNM2	159.07/244.48/232.38	48.854/171.13/86.551	232.38	86.551	-1.4145	2760.2	9491.5	1.5617	0.059185	0.94082	0.11837	0.54724	FALSE
NonTargeting_Human_0273	NonTargeting_Human_0273	508.31/364.74/284.71	175.67/105.89/249.19	364.74	175.67	-1.0498	13509	14898	1.5602	0.059361	0.94064	0.11872	0.54827	FALSE
OLR1_3	OLR1	277.66/273.06/309.55	106.02/115.34/236.83	277.66	115.34	-1.2601	519.09	11341	1.5595	0.059442	0.94056	0.11888	0.54868	FALSE
NonTargeting_Human_0502	NonTargeting_Human_0502	260.3/544.15/689.16	311.83/258.11/432.75	544.15	311.83	-0.80127	50800	22226	1.5594	0.059453	0.94055	0.11891	0.54868	FALSE
CNOT2_7	CNOT2	351.41/251.38/359.22	166.31/126.69/280.58	351.41	166.31	-1.0747	5033.7	14353	1.5582	0.059597	0.9404	0.11919	0.54956	FALSE
PDHX_8	PDHX	156.18/315.45/86.922	45.736/135.2/0	156.18	45.736	-1.7498	15082	6379.1	1.5581	0.0596	0.9404	0.1192	0.54956	FALSE
CCDC169-SOHLH2_11	CCDC169-SOHLH2	57.122/169.56/89.582	17.671/69.963/19.973	89.582	19.973	-2.1107	3724.7	3658.9	1.5569	0.059746	0.94025	0.11949	0.55034	FALSE
CCDC43_2	CCDC43	454.08/170.54/485.16	118.5/349.81/242.53	454.08	242.53	-0.90202	40681	18547	1.5568	0.059763	0.94024	0.11953	0.55034	FALSE
NonTargeting_Human_0545	NonTargeting_Human_0545	251.63/186.31/215.53	56.13/252.43/77.04	215.53	77.04	-1.4723	1078.2	8803.2	1.5564	0.059807	0.94019	0.11961	0.55037	FALSE
KLHDC7B_14	KLHDC7B	373.1/198.14/353.89	273.37/78.472/168.35	353.89	168.35	-1.0674	12314	14455	1.556	0.059851	0.94015	0.1197	0.55037	FALSE
COPS2_11	COPS2	0.72306/96.607/78.052	16.631/73.745/8.56	78.052	16.631	-2.1647	3162	3188	1.5556	0.059906	0.94009	0.11981	0.55037	FALSE
OR52B2_12	OR52B2	134.49/122.24/114.42	77.958/0/31.386	122.24	31.386	-1.928	105.63	4992.7	1.5552	0.059951	0.94005	0.1199	0.55037	FALSE
TAF1_1	TAF1	95.444/0/113.53	165.27/3.7818/21.875	95.444	21.875	-2.0759	4718.3	3898.3	1.5552	0.059953	0.94005	0.11991	0.55037	FALSE
GLOD5_9	GLOD5	95.444/247.43/147.23	83.156/39.709/41.849	147.23	41.849	-1.7906	6361	6013.7	1.5548	0.059999	0.94	0.12	0.55059	FALSE
COG5_13	COG5	93.275/199.13/187.15	70.682/61.454/43.751	187.15	61.454	-1.591	4477.8	7643.9	1.5541	0.060081	0.93992	0.12016	0.55114	FALSE
EIF3F_6	EIF3F	66.522/88.721/133.04	99.787/19.854/13.315	88.721	19.854	-2.1051	1228.6	3623.7	1.5524	0.060281	0.93972	0.12056	0.55277	FALSE
TMEM18_1	TMEM18	102.67/235.6/297.13	89.392/23.636/244.43	235.6	89.392	-1.3882	10728	9623	1.5516	0.060384	0.93962	0.12077	0.55348	FALSE
FUNDC2_4	FUNDC2	169.92/372.63/420.42	91.471/182.47/184.51	372.63	182.47	-1.0261	21687	15220	1.5512	0.060426	0.93957	0.12085	0.55348	FALSE
ACTR3_1	ACTR3	269.7/159.7/79.826	47.815/0/85.6	159.7	47.815	-1.719	9240.2	6522.7	1.5512	0.060427	0.93957	0.12085	0.55348	FALSE
AQP10_2	AQP10	46.999/394.32/290.03	77.958/190.03/124.59	290.03	124.59	-1.2124	34970	11846	1.5495	0.060635	0.93937	0.12127	0.55455	FALSE
PIM2_3	PIM2	85.321/464.31/515.32	221.4/251.49/282.48	464.31	251.49	-0.88197	73116	18964	1.5483	0.060774	0.93923	0.12155	0.55537	FALSE
hsa-mir-6817_5	hsa-mir-6817	315.98/156.74/70.956	38.46/133.31/46.604	156.74	46.604	-1.7284	16358	6401.9	1.5481	0.060799	0.9392	0.1216	0.55537	FALSE
KDM8_2	KDM8	302.24/420.93/179.16	133.05/104/186.42	302.24	133.05	-1.1777	14618	12345	1.5477	0.060845	0.93915	0.12169	0.55537	FALSE
NAA38_14	NAA38	241.5/335.17/392.92	149.68/156/179.76	335.17	156	-1.0984	6054.3	13690	1.5474	0.060884	0.93912	0.12177	0.55537	FALSE
NonTargeting_Human_0509	NonTargeting_Human_0509	247.29/272.08/271.41	141.36/112.51/19.973	271.41	112.51	-1.263	291.14	11085	1.5468	0.060954	0.93905	0.12191	0.55564	FALSE
TFAM_15	TFAM	123.64/145.9/78.052	62.367/1.8909/32.338	123.64	32.338	-1.9026	1286.9	5050.1	1.5466	0.060982	0.93902	0.12196	0.55564	FALSE
FBXL8_12	FBXL8	399.13/561.9/270.52	202.69/226.91/150.27	399.13	202.69	-0.97408	21517	16302	1.5454	0.06113	0.93887	0.12226	0.55678	FALSE
DEXI_6	DEXI	101.23/154.77/117.96	1.0394/30.254/113.18	117.96	30.254	-1.9284	817.31	4818.2	1.5439	0.061305	0.93869	0.12261	0.55708	FALSE
LONP1_15	LONP1	216.2/327.28/215.53	61.327/78.472/251.09	216.2	78.472	-1.4505	6170.3	8830.3	1.5437	0.061329	0.93867	0.12266	0.55708	FALSE
HIST2H2BF_9	HIST2H2BF	169.2/175.47/196.9	56.13/38.763/157.88	175.47	56.13	-1.6271	249.38	7167	1.5432	0.06139	0.93861	0.12278	0.55728	FALSE
TAF2_14	TAF2	60.737/115.34/141.91	183.98/29.309/0	115.34	29.309	-1.9405	1843.7	4710.9	1.5428	0.061445	0.93856	0.12289	0.5574	FALSE
C2CD4A_8	C2CD4A	159.8/321.37/295.36	128.89/104.94/707.62	295.36	128.89	-1.19	9526.5	12064	1.5427	0.061449	0.93855	0.1229	0.5574	FALSE
RALGAPA2_3	RALGAPA2	232.83/506.69/239.48	272.33/92.653/83.697	239.48	92.653	-1.3605	35725	9781.3	1.5417	0.061575	0.93843	0.12315	0.55834	FALSE
USP9X_1	USP9X	131.6/270.11/141.03	83.156/0/39.946	141.03	39.946	-1.7943	8375.3	5760.1	1.5395	0.061838	0.93816	0.12368	0.56008	FALSE
NXF2_11	NXF2	25.307/152.8/234.16	64.446/45.381/9.5111	152.8	45.381	-1.7294	11436	6240.9	1.5377	0.062062	0.93794	0.12412	0.56121	FALSE
OTC_2	OTC	162.69/0/262.54	38.46/50.108/159.79	162.69	50.108	-1.6793	18219	6644.9	1.5376	0.062075	0.93792	0.12415	0.56121	FALSE
ATXN7L3_11	ATXN7L3	292.12/379.53/656.35	202.69/152.22/189.27	379.53	189.27	-0.99995	42135	15502	1.5369	0.062163	0.93784	0.12433	0.56179	FALSE
MLLT1_15	MLLT1	178.6/237.57/130.38	58.209/19.854/247.29	178.6	58.209	-1.6009	2901.5	7294.6	1.5365	0.062213	0.93779	0.12443	0.56183	FALSE
GIGYF2_6	GIGYF2	150.4/133.08/290.03	29.104/44.436/161.69	150.4	44.436	-1.7364	9899.2	6142.8	1.5348	0.062414	0.93759	0.12483	0.5629	FALSE
MARS2_9	MARS2	112.07/162.65/41.687	48.854/0.94544/28.533	112.07	28.533	-1.9369	3756.4	4577.6	1.5324	0.062709	0.93729	0.12542	0.56422	FALSE
NAA10_9	NAA10	458.42/567.81/612	387.71/252.43/334.79	567.81	334.79	-0.7604	6959.6	23192	1.5309	0.0629	0.9371	0.1258	0.56573	FALSE
RAB7A_14	RAB7A	165.58/47.318/176.5	37.42/51.999/54.213	165.58	51.999	-1.6522	7052.7	6763	1.5303	0.062972	0.93703	0.12594	0.56605	FALSE
TAF2_4	TAF2	114.24/154.77/194.24	46.775/152.22/37.093	154.77	46.775	-1.7051	1600.3	6321.4	1.5299	0.06302	0.93698	0.12604	0.56605	FALSE
TAF10_12	TAF10	116.41/86.749/48.783	0/58.617/19.973	86.749	19.973	-2.0648	1160.7	3543.2	1.5298	0.063032	0.93697	0.12606	0.56605	FALSE
ZNF263_10	ZNF263	26.753/55.204/187.15	88.353/11.345/2.8533	55.204	11.345	-2.1867	9109.2	2254.8	1.5296	0.063059	0.93694	0.12612	0.56605	FALSE
GIGYF2_7	GIGYF2	282.72/212.93/356.56	28.065/173.96/121.74	282.72	121.74	-1.2088	5161.2	11547	1.5295	0.063075	0.93692	0.12615	0.56605	FALSE
RDH14_6	RDH14	265.36/187.3/267.86	104.98/121.96/110.33	265.36	110.33	-1.2586	3050.1	10839	1.5288	0.06316	0.93684	0.12632	0.5665	FALSE
RBM14_15	RBM14	150.4/133.08/71.843	174.63/16.073/37.093	133.08	37.093	-1.8155	2025	5435.6	1.5286	0.06318	0.93682	0.12636	0.5665	FALSE
ISG15_1	ISG15	133.77/185.33/14.191	37.42/0/92.257	133.77	37.42	-1.8105	8478.4	5463.6	1.5279	0.063264	0.93674	0.12653	0.56671	FALSE
PAM16_1	PAM16	404.91/342.07/263.43	163.19/508.65/125.55	342.07	163.19	-1.0631	5067.1	13972	1.5275	0.063319	0.93668	0.12664	0.56675	FALSE
POLRMT_2	POLRMT	23.138/52.247/0.88695	0/130.47/4.7555	23.138	4.7555	-2.0683	671.21	945.05	1.5266	0.063428	0.93657	0.12686	0.56704	FALSE
NonTargeting_Human_0742	NonTargeting_Human_0742	287.06/458.39/318.42	146.56/104.94/385.2	318.42	146.56	-1.1141	10288	13005	1.5264	0.06346	0.93654	0.12692	0.56704	FALSE
CDC14A_9	CDC14A	214.75/179.41/212.87	77.958/69.017/94.159	212.87	77.958	-1.4376	561.41	8694.5	1.5263	0.063463	0.93654	0.12693	0.56704	FALSE
ARL8A_15	ARL8A	244.39/355.87/342.36	143.44/163.56/339.54	342.36	163.56	-1.0611	4890.2	13984	1.5261	0.063487	0.93651	0.12697	0.56704	FALSE
ERCC3_7	ERCC3	109.91/35.488/198.68	28.065/101.16/0	109.91	28.065	-1.932	6709.2	4489	1.5244	0.0637	0.9363	0.1274	0.56853	FALSE
RNPEP_13	RNPEP	287.06/66.048/272.3	115.38/85.09/137.91	272.3	115.38	-1.2316	21378	11122	1.5237	0.063786	0.93621	0.12757	0.56876	FALSE
MRPL28_4	MRPL28	57.122/0/54.991	0/24.582/11.413	54.991	11.413	-2.1733	1514.3	2246.1	1.5236	0.063803	0.9362	0.12761	0.56876	FALSE
CCDC22_10	CCDC22	200.29/384.46/248.35	85.235/302.54/99.866	248.35	99.866	-1.3057	10418	10144	1.5236	0.063806	0.93619	0.12761	0.56876	FALSE
GAGE12B_8	GAGE12B	0/273.06/115.3	30.144/35.927/0	115.3	30.144	-1.9009	19091	4709.5	1.5235	0.063819	0.93618	0.12764	0.56876	FALSE
ST6GAL1_5	ST6GAL1	493.85/189.27/362.76	216.2/45.381/178.81	362.76	178.81	-1.0165	23642	14817	1.5219	0.064014	0.93599	0.12803	0.57008	FALSE
NonTargeting_Human_0763	NonTargeting_Human_0763	141/297.71/234.16	161.11/73.745/91.306	234.16	91.306	-1.3491	6358.7	9563.9	1.52	0.064259	0.93574	0.12852	0.57109	FALSE
SVOP_2	SVOP	36.876/75.906/192.47	173.59/17.018/0	75.906	17.018	-2.0937	7555.2	3100.3	1.5199	0.064268	0.93573	0.12854	0.57109	FALSE
hsa-mir-3680-1_1	hsa-mir-3680-1	50.614/18.73/175.62	38.46/3.7818/10.462	50.614	10.462	-2.1709	8321.2	2067.3	1.5195	0.064324	0.93568	0.12865	0.57122	FALSE
ZNF143_11	ZNF143	347.79/180.4/427.51	108.1/168.29/295.79	347.79	168.29	-1.0429	17188	14205	1.519	0.064376	0.93562	0.12875	0.57122	FALSE
ELOF1_3	ELOF1	122.92/146.88/127.72	35.341/34.036/36.142	127.72	35.341	-1.8246	195.1	5216.7	1.5187	0.064421	0.93558	0.12884	0.57122	FALSE
ELP5_2	ELP5	129.43/125.2/41.687	34.302/89.817/0	125.2	34.302	-1.8378	3495.8	5113.5	1.5186	0.064434	0.93557	0.12887	0.57122	FALSE
ZBTB17_12	ZBTB17	252.35/269.12/196.02	102.91/145.6/86.551	252.35	102.91	-1.2859	1727.3	10307	1.5184	0.06446	0.93554	0.12892	0.57122	FALSE
METTL14_15	METTL14	57.122/103.51/160.54	25.986/17.018/138.86	103.51	25.986	-1.9533	2702.1	4227.7	1.5183	0.064469	0.93553	0.12894	0.57122	FALSE
NMT1_12	NMT1	234.99/100.55/172.07	33.262/188.14/56.115	172.07	56.115	-1.5994	4537.3	7028	1.5177	0.064545	0.93546	0.12909	0.57147	FALSE
GTF2H3_14	GTF2H3	117.14/41.403/128.61	31.183/0/155.03	117.14	31.183	-1.8761	2933.5	4784.3	1.5161	0.064742	0.93526	0.12948	0.57254	FALSE
SEZ6L2_2	SEZ6L2	112.8/31.545/94.017	22.868/84.144/0	94.017	22.868	-1.9931	2127.7	3840.1	1.5138	0.065044	0.93496	0.13009	0.57401	FALSE
GTF2H2_6	GTF2H2	73.752/112.38/29.27	16.631/44.436/0	73.752	16.631	-2.084	1735.4	3012.4	1.5115	0.065333	0.93467	0.13067	0.57594	FALSE
SEC61B_4	SEC61B	62.906/181.38/190.7	60.288/61.454/75.137	181.38	61.454	-1.5461	7061.9	7408.5	1.5113	0.065357	0.93464	0.13071	0.57594	FALSE
ARL8A_2	ARL8A	203.18/298.69/291.81	129.93/102.11/205.44	291.81	129.93	-1.1612	3951.2	11919	1.5097	0.065555	0.93444	0.13111	0.57623	FALSE
GAPDH_1	GAPDH	18.8/71.963/75.391	3.1183/35.927/16.169	71.963	16.169	-2.0874	1419	2939.3	1.5097	0.06556	0.93444	0.13112	0.57623	FALSE
METAP1_7	METAP1	88.213/61.119/60.313	11.434/13.236/158.83	61.119	13.236	-2.1255	367.38	2496.4	1.5095	0.065583	0.93442	0.13117	0.57623	FALSE
ZBTB10_2	ZBTB10	362.98/471.21/417.76	437.61/221.23/151.23	417.76	221.23	-0.91403	2928.9	17063	1.5095	0.065583	0.93442	0.13117	0.57623	FALSE
KAT8_9	KAT8	63.629/44.36/57.652	65.485/0/12.364	57.652	12.364	-2.1338	106.2	2354.8	1.509	0.065644	0.93436	0.13129	0.57636	FALSE
CLK2_1	CLK2	299.35/280.95/108.21	122.65/204.22/65.626	280.95	122.65	-1.1891	15089	11475	1.5089	0.065668	0.93433	0.13134	0.57636	FALSE
NonTargeting_Human_0524	NonTargeting_Human_0524	446.85/431.78/250.12	274.41/158.83/232.07	431.78	232.07	-0.89285	16613	17636	1.508	0.065778	0.93422	0.13156	0.57636	FALSE
ELP3_3	ELP3	93.275/97.593/36.365	112.26/2.8363/22.827	93.275	22.827	-1.9843	1628.7	3809.7	1.5079	0.06579	0.93421	0.13158	0.57636	FALSE
TMEM253_15	TMEM253	232.83/335.17/535.72	293.12/124.8/160.74	335.17	160.74	-1.0555	25348	13690	1.5058	0.066054	0.93395	0.13211	0.5767	FALSE
MED27_3	MED27	71.583/56.19/79.826	93.55/16.073/16.169	71.583	16.169	-2.0798	152.45	2923.8	1.5057	0.066077	0.93392	0.13215	0.5767	FALSE
KIAA1328_4	KIAA1328	251.63/97.593/317.53	159.04/63.345/103.67	251.63	103.67	-1.2711	14035	10277	1.5053	0.066123	0.93388	0.13225	0.57686	FALSE
RUVBL1_6	RUVBL1	22.415/57.176/122.4	1.0394/32.145/12.364	57.176	12.364	-2.122	2731.2	2335.3	1.5034	0.066369	0.93363	0.13274	0.57839	FALSE
PIM2_12	PIM2	30.369/133.08/182.71	38.46/33.09/175	133.08	38.46	-1.7647	6506.6	5435.6	1.5023	0.066504	0.9335	0.13301	0.57877	FALSE
POLRMT_3	POLRMT	207.52/107.45/172.07	57.17/0.94544/88.453	172.07	57.17	-1.573	2716.1	7028	1.5022	0.066529	0.93347	0.13306	0.57877	FALSE
RNF151_2	RNF151	112.8/146.88/45.235	30.144/19.854/89.404	112.8	30.144	-1.8694	2863.3	4607.1	1.5015	0.066607	0.93339	0.13321	0.57877	FALSE
MED12_6	MED12	279.82/239.55/390.26	122.65/83.199/163.59	279.82	122.65	-1.1834	6909.2	11429	1.5014	0.066627	0.93337	0.13325	0.57877	FALSE
KDM8_1	KDM8	86.767/188.29/40.8	2.0789/43.49/20.924	86.767	20.924	-2.0012	6209.5	3543.9	1.5008	0.066705	0.93329	0.13341	0.57878	FALSE
WDR13_14	WDR13	233.55/81.82/258.1	174.63/92.653/19.022	233.55	92.653	-1.3245	11812	9539.1	1.5006	0.066733	0.93327	0.13347	0.57878	FALSE
USO1_5	USO1	35.43/105.48/164.09	34.302/27.418/0	105.48	27.418	-1.9057	4170.9	4308.2	1.5005	0.066742	0.93326	0.13348	0.57878	FALSE
TNFRSF4_7	TNFRSF4	295.73/605.27/411.55	161.11/221.23/217.8	411.55	217.8	-0.91492	25472	16809	1.4997	0.066841	0.93316	0.13368	0.57906	FALSE
HTRA2_9	HTRA2	168.47/208.99/196.02	4.1578/239.2/70.382	196.02	70.382	-1.4647	463.44	8006.2	1.4996	0.066859	0.93314	0.13372	0.57906	FALSE
C12orf43_9	C12orf43	107.01/127.17/40.8	28.065/160.73/0	107.01	28.065	-1.8938	2395.2	4370.9	1.4986	0.066983	0.93302	0.13397	0.57906	FALSE
AQP10_12	AQP10	95.444/124.21/33.704	23.907/167.34/22.827	95.444	23.907	-1.9531	2319.6	3898.3	1.4985	0.067008	0.93299	0.13402	0.57906	FALSE
ACTR3_3	ACTR3	129.43/153.78/78.939	45.736/25.527/37.093	129.43	37.093	-1.7756	1571.1	5286.4	1.4982	0.067039	0.93296	0.13408	0.57906	FALSE
RAB13_8	RAB13	202.46/26.616/204.89	176.71/0/74.186	202.46	74.186	-1.4362	15463	8269.2	1.498	0.067063	0.93294	0.13413	0.57906	FALSE
RBM4B_14	RBM4B	36.153/125.2/162.31	35.341/27.418/67.529	125.2	35.341	-1.796	4653.1	5113.5	1.4973	0.067152	0.93285	0.1343	0.57921	FALSE
TRIM4_14	TRIM4	221.98/292.78/395.58	132.01/280.8/85.6	292.78	132.01	-1.1432	7790.5	11958	1.4962	0.067297	0.9327	0.13459	0.5794	FALSE
C16orf62_7	C16orf62	583.51/398.26/646.59	250.51/352.65/487.92	583.51	352.65	-0.72491	19149	23833	1.496	0.067331	0.93267	0.13466	0.5794	FALSE
GFER_14	GFER	294.29/34.503/379.62	297.28/99.271/133.15	294.29	133.15	-1.1382	37384	12020	1.4952	0.067432	0.93257	0.13486	0.5794	FALSE
TMEM134_9	TMEM134	94.721/0/104.66	165.27/0/23.778	94.721	23.778	-1.9498	4535.4	3868.8	1.4952	0.067435	0.93257	0.13487	0.5794	FALSE
EIF3C_4	EIF3C	59.291/110.41/106.43	28.065/31.2/0	106.43	28.065	-1.8861	1119.2	4347.2	1.4934	0.067664	0.93234	0.13533	0.58096	FALSE
TPP2_14	TPP2	305.13/144.91/292.7	138.25/132.36/129.35	292.7	132.36	-1.139	10997	11955	1.4923	0.067808	0.93219	0.13562	0.582	FALSE
DHX36_9	DHX36	70.86/0/52.33	54.051/0/11.413	52.33	11.413	-2.1031	1540.9	2137.4	1.4909	0.067991	0.93201	0.13598	0.58288	FALSE
C2orf49_2	C2orf49	160.52/149.84/63.861	46.775/126.69/38.044	149.84	46.775	-1.6587	3753.2	6120.1	1.4908	0.068007	0.93199	0.13601	0.58288	FALSE
CTNNBIP1_7	CTNNBIP1	633.4/509.65/330.83	167.35/575.77/294.84	509.65	294.84	-0.78751	23645	20816	1.4903	0.068072	0.93193	0.13614	0.58311	FALSE
UBE2G2_5	UBE2G2	123.64/168.57/168.52	56.13/78.472/18.071	168.52	56.13	-1.5691	1007	6883.1	1.4902	0.068081	0.93192	0.13616	0.58311	FALSE
SERPINA1_6	SERPINA1	259.58/191.24/234.16	101.87/34.981/94.159	234.16	94.159	-1.3052	1243.9	9563.9	1.4879	0.068384	0.93162	0.13677	0.58509	FALSE
CHMP1A_2	CHMP1A	232.1/191.24/171.18	68.603/99.271/43.751	191.24	68.603	-1.4657	1036	7811.2	1.4876	0.068431	0.93157	0.13686	0.58528	FALSE
MTA2_10	MTA2	130.87/114.35/103.77	60.288/0.94544/31.386	114.35	31.386	-1.8326	192.44	4670.6	1.4873	0.068466	0.93153	0.13693	0.58538	FALSE
DHRSX_11	DHRSX	155.46/144.91/61.2	44.696/39.709/97.013	144.91	44.696	-1.6749	3559.4	5918.8	1.4864	0.068588	0.93141	0.13718	0.58615	FALSE
TBC1D22A_3	TBC1D22A	395.51/278.98/111.76	123.69/38.763/315.77	278.98	123.69	-1.1669	20772	11395	1.4855	0.068702	0.9313	0.1374	0.58663	FALSE
MORC3_10	MORC3	115.69/16.758/94.017	23.907/0/74.186	94.017	23.907	-1.9316	3219.3	3840.1	1.4849	0.06878	0.93122	0.13756	0.58683	FALSE
NonTargeting_Human_0688	NonTargeting_Human_0688	28.922/279.96/230.61	69.643/149.38/92.257	230.61	92.257	-1.3124	21557	9419	1.4844	0.068856	0.93114	0.13771	0.58706	FALSE
ERCC3_3	ERCC3	113.52/12.815/116.19	22.868/31.2/105.57	113.52	31.2	-1.8305	5074.3	4636.7	1.4841	0.068887	0.93111	0.13777	0.58713	FALSE
SPI1_7	SPI1	142.44/56.19/148.12	200.61/2.8363/43.751	142.44	43.751	-1.6805	3735.9	5818	1.4828	0.06907	0.93093	0.13814	0.58822	FALSE
MRPL21_5	MRPL21	459.87/225.75/158.76	89.392/42.545/138.86	225.75	89.392	-1.3268	29650	9220.4	1.4826	0.069087	0.93091	0.13817	0.58822	FALSE
ZNF764_13	ZNF764	121.47/274.05/232.38	63.406/93.599/291.04	232.38	93.599	-1.3028	7018.3	9491.5	1.4817	0.069204	0.9308	0.13841	0.58864	FALSE
JAK1_10	JAK1	278.38/285.88/150.78	123.69/208.94/68.48	278.38	123.69	-1.1638	8168.5	11370	1.4815	0.069233	0.93077	0.13847	0.58864	FALSE
ASH2L_5	ASH2L	112.07/69.991/103.77	0/49.163/27.582	103.77	27.582	-1.8741	605.09	4238.6	1.4809	0.069312	0.93069	0.13862	0.58911	FALSE
WDR82_1	WDR82	135.94/168.57/61.2	122.65/2.8363/40.898	135.94	40.898	-1.7086	3325.2	5552.2	1.4804	0.069385	0.93061	0.13877	0.58931	FALSE
RPUSD4_3	RPUSD4	658.71/379.53/404.45	284.81/195.71/214.95	404.45	214.95	-0.90883	32634	16520	1.4801	0.06942	0.93058	0.13884	0.5894	FALSE
PROX1_10	PROX1	574.83/624.99/462.1	348.21/338.47/497.43	574.83	348.21	-0.72154	7611.8	23479	1.4796	0.069492	0.93051	0.13898	0.58982	FALSE
YME1L1_7	YME1L1	138.1/71.963/58.539	0/17.018/48.506	71.963	17.018	-2.0177	2277.5	2939.3	1.4784	0.069646	0.93035	0.13929	0.59071	FALSE
ZBTB8OS_1	ZBTB8OS	162.69/324.32/163.2	86.274/0/54.213	163.2	54.213	-1.5724	12981	6665.8	1.4778	0.069737	0.93026	0.13947	0.59127	FALSE
hsa-mir-6831_5	hsa-mir-6831	153.29/22.673/115.3	32.223/23.636/101.77	115.3	32.223	-1.8077	5011.7	4709.5	1.4773	0.069799	0.9302	0.1396	0.59159	FALSE
TRIAP1_1	TRIAP1	360.81/341.08/175.62	168.39/272.29/152.18	341.08	168.39	-1.014	13884	13931	1.4763	0.069926	0.93007	0.13985	0.59226	FALSE
STAM2_12	STAM2	109.91/232.65/196.9	72.761/69.017/103.67	196.9	72.761	-1.4239	4423.1	8042.4	1.4753	0.07006	0.92994	0.14012	0.59278	FALSE
SNAPC3_8	SNAPC3	94.721/202.09/266.97	75.88/173.02/54.213	202.09	75.88	-1.4014	7868.8	8254.1	1.4739	0.070249	0.92975	0.1405	0.59344	FALSE
PRPF38B_9	PRPF38B	78.091/131.11/53.217	107.06/0/19.022	78.091	19.022	-1.9819	1714.9	3189.6	1.4736	0.070288	0.92971	0.14058	0.59344	FALSE
TMOD2_9	TMOD2	0/97.593/78.052	99.787/0/19.022	78.052	19.022	-1.9812	3237	3188	1.4732	0.070342	0.92966	0.14068	0.59344	FALSE
GCFC2_1	GCFC2	138.83/167.58/70.956	42.617/370.61/26.631	138.83	42.617	-1.6807	2716.7	5670.3	1.4731	0.070359	0.92964	0.14072	0.59344	FALSE
GNB1L_7	GNB1L	553.14/520.5/773.42	273.37/331.85/703.82	553.14	331.85	-0.73538	24795	22593	1.473	0.070369	0.92963	0.14074	0.59344	FALSE
BMP15_11	BMP15	464.93/371.64/447.03	248.43/289.31/119.84	447.03	248.43	-0.84496	3001.6	18258	1.473	0.070379	0.92962	0.14076	0.59344	FALSE
RALA_9	RALA	86.767/161.67/156.1	50.933/41.599/179.76	156.1	50.933	-1.597	2419.3	6376	1.4729	0.070387	0.92961	0.14077	0.59344	FALSE
hsa-mir-532_3	hsa-mir-532	21.692/215.89/219.96	84.195/102.11/40.898	215.89	84.195	-1.3481	18864	8817.8	1.4728	0.070399	0.9296	0.1408	0.59344	FALSE
OSTC_1	OSTC	344.18/269.12/427.51	1.0394/171.13/259.65	344.18	171.13	-1.0039	6289.1	14058	1.4722	0.070488	0.92951	0.14098	0.59344	FALSE
POLRMT_8	POLRMT	167.03/49.289/64.748	47.815/15.127/0	64.748	15.127	-2.0275	5350	2644.6	1.4711	0.070639	0.92936	0.14128	0.59368	FALSE
HYPK_9	HYPK	25.307/0/54.991	33.262/0/5.7066	25.307	5.7066	-1.9718	760.8	1033.7	1.4707	0.07069	0.92931	0.14138	0.59368	FALSE
DOCK5_5	DOCK5	444.68/228.7/269.63	97.708/228.8/118.89	269.63	118.89	-1.1747	16159	11013	1.4706	0.070702	0.9293	0.1414	0.59368	FALSE
GIGYF2_10	GIGYF2	407.08/74.92/321.08	154.88/77.526/267.26	321.08	154.88	-1.047	33995	13114	1.4684	0.071	0.929	0.142	0.59537	FALSE
CEBPA_1	CEBPA	315.98/353.9/383.16	178.78/163.56/230.17	353.9	178.78	-0.98113	1147.2	14455	1.4675	0.071119	0.92888	0.14224	0.59554	FALSE
CBWD1_15	CBWD1	271.87/141.95/532.17	120.58/380.07/120.79	271.87	120.79	-1.1638	42318	11104	1.4666	0.071239	0.92876	0.14248	0.59554	FALSE
ZNF22_14	ZNF22	228.49/120.27/382.28	92.511/69.963/152.18	228.49	92.511	-1.2952	17682	9332.4	1.4665	0.071262	0.92874	0.14252	0.59554	FALSE
SRP9_1	SRP9	308.75/273.06/219.08	121.62/156/116.03	273.06	121.62	-1.1604	2093.9	11153	1.4664	0.071264	0.92874	0.14253	0.59554	FALSE
MKL1_10	MKL1	90.383/226.73/244.8	91.471/456.65/53.262	226.73	91.471	-1.3003	9458.7	9260.7	1.4658	0.071353	0.92865	0.14271	0.59607	FALSE
SREBF1_12	SREBF1	302.96/245.46/349.46	142.4/48.218/322.42	302.96	142.4	-1.0838	2734.2	12374	1.465	0.071462	0.92854	0.14292	0.59669	FALSE
STAG2_6	STAG2	106.29/100.55/26.609	27.026/50.108/19.022	100.55	27.026	-1.8574	2750.2	4106.9	1.4649	0.071475	0.92852	0.14295	0.59669	FALSE
MAP1S_13	MAP1S	57.122/160.68/128.61	38.46/14.182/74.186	128.61	38.46	-1.7157	3069.6	5252.9	1.4647	0.071506	0.92849	0.14301	0.59674	FALSE
CEP97_5	CEP97	221.26/40.417/125.95	37.42/32.145/187.37	125.95	37.42	-1.7243	8199.6	5144.2	1.4622	0.071846	0.92815	0.14369	0.59882	FALSE
RBM14_1	RBM14	159.8/65.062/141.91	44.696/25.527/84.648	141.91	44.696	-1.645	3112.9	5796.3	1.4618	0.071894	0.92811	0.14379	0.59882	FALSE
C21orf59_8	C21orf59	251.63/302.64/249.23	37.42/107.78/317.67	251.63	107.78	-1.2156	1304	10277	1.4618	0.071903	0.9281	0.14381	0.59882	FALSE
GNB1L_1	GNB1L	321.76/266.16/263.43	117.46/209.89/68.48	266.16	117.46	-1.1733	1549.4	10871	1.4615	0.071943	0.92806	0.14389	0.59895	FALSE
POLR2L_15	POLR2L	140.27/106.47/33.704	107.06/28.363/29.484	106.47	29.484	-1.8177	3218.6	4348.5	1.4599	0.072158	0.92784	0.14432	0.59992	FALSE
GPBP1L1_2	GPBP1L1	111.35/178.43/150.78	27.026/49.163/111.28	150.78	49.163	-1.5973	1159.5	6158.6	1.4588	0.072312	0.92769	0.14462	0.60066	FALSE
HNF4A_15	HNF4A	174.26/300.67/161.43	61.327/114.4/19.973	174.26	61.327	-1.4915	8071.8	7117.4	1.4587	0.07232	0.92768	0.14464	0.60066	FALSE
CCDC115_15	CCDC115	99.782/230.67/69.182	27.026/0.94544/207.34	99.782	27.026	-1.8464	9034.5	4075.5	1.4577	0.072463	0.92754	0.14493	0.60164	FALSE
UBA3_11	UBA3	73.752/67.034/28.383	165.27/7.5635/16.169	67.034	16.169	-1.9865	769.52	2737.9	1.456	0.072699	0.9273	0.1454	0.60322	FALSE
MTFP1_5	MTFP1	396.24/178.43/306	154.88/135.2/145.52	306	145.52	-1.0671	12209	12498	1.456	0.072702	0.9273	0.1454	0.60322	FALSE
MED1_15	MED1	359.36/286.86/204.89	132.01/157.89/132.2	286.86	132.2	-1.1118	5988.1	11717	1.4553	0.072799	0.9272	0.1456	0.6034	FALSE
COX5B_2	COX5B	66.522/140.97/143.69	44.696/263.78/0	140.97	44.696	-1.6354	2774.8	5757.7	1.454	0.072973	0.92703	0.14595	0.60443	FALSE
GTF2H2_12	GTF2H2	19.523/80.835/61.2	14.552/0/24.729	61.2	14.552	-1.9998	1061.3	2499.7	1.4537	0.07301	0.92699	0.14602	0.60453	FALSE
SYS1_9	SYS1	40.491/251.38/208.43	66.525/81.308/104.62	208.43	81.308	-1.3474	15024	8513.3	1.4533	0.073064	0.92694	0.14613	0.60465	FALSE
PTPMT1_2	PTPMT1	69.414/126.18/102	28.065/246.76/0	102	28.065	-1.8253	823.28	4166.1	1.4527	0.073158	0.92684	0.14632	0.60514	FALSE
ALG8_15	ALG8	159.07/37.46/147.23	47.815/127.63/38.044	147.23	47.815	-1.6025	6095.3	6013.7	1.4523	0.073216	0.92678	0.14643	0.60542	FALSE
RAB13_3	RAB13	136.66/218.84/94.904	54.051/0.94544/42.8	136.66	42.8	-1.6521	4249	5581.7	1.4517	0.073286	0.92671	0.14657	0.6058	FALSE
EBP_1	EBP	338.39/331.22/88.695	164.23/200.43/134.11	331.22	164.23	-1.0077	29436	13529	1.4502	0.073501	0.9265	0.147	0.60634	FALSE
EGLN2_10	EGLN2	428.05/146.88/291.81	136.17/190.98/71.333	291.81	136.17	-1.094	19783	11919	1.4502	0.073503	0.9265	0.14701	0.60634	FALSE
hsa-mir-6886_7	hsa-mir-6886	208.24/260.25/252.78	68.603/109.67/263.46	252.78	109.67	-1.1973	1019.8	10325	1.4499	0.073548	0.92645	0.1471	0.60634	FALSE
STAG2_11	STAG2	127.26/27.602/118.85	156.96/34.981/0	118.85	34.981	-1.7359	4198.6	4854.4	1.4498	0.07356	0.92644	0.14712	0.60634	FALSE
ZNF143_5	ZNF143	223.43/70.977/194.24	138.25/55.781/73.235	194.24	73.235	-1.3951	8023.1	7933.7	1.4494	0.073619	0.92638	0.14724	0.60634	FALSE
CDK12_12	CDK12	258.13/378.54/239.48	113.3/125.74/77.991	258.13	113.3	-1.1809	7423.3	10543	1.449	0.073663	0.92634	0.14733	0.60634	FALSE
PITPNM2_6	PITPNM2	281.99/568.8/149.01	126.81/129.53/276.77	281.99	129.53	-1.1164	49971	11518	1.4486	0.073723	0.92628	0.14745	0.60634	FALSE
SETDB1_6	SETDB1	174.26/139.98/163.2	56.13/0/233.02	163.2	56.13	-1.5231	330.67	6665.8	1.4486	0.073731	0.92627	0.14746	0.60634	FALSE
TADA2A_14	TADA2A	102.67/321.37/164.97	56.13/125.74/57.066	164.97	57.066	-1.5152	14170	6738.2	1.4485	0.073741	0.92626	0.14748	0.60634	FALSE
RALA_1	RALA	108.46/56.19/93.13	24.947/0/65.626	93.13	24.947	-1.8591	799.78	3803.8	1.4482	0.07378	0.92622	0.14756	0.60639	FALSE
ARPC5L_2	ARPC5L	523.5/300.67/134.82	88.353/240.14/142.67	300.67	142.67	-1.0702	38580	12280	1.4475	0.073882	0.92612	0.14776	0.60659	FALSE
FAM219B_1	FAM219B	27.476/355.87/220.85	87.313/152.22/89.404	220.85	89.404	-1.2951	27812	9020.5	1.4474	0.073892	0.92611	0.14778	0.60659	FALSE
MBOAT7_14	MBOAT7	321.76/140.97/232.38	96.669/59.563/152.18	232.38	96.669	-1.2567	8172.7	9491.5	1.4473	0.073904	0.9261	0.14781	0.60659	FALSE
NonTargeting_Human_0151	NonTargeting_Human_0151	466.37/392.34/337.93	209.97/165.45/313.86	392.34	209.97	-0.89876	4220.7	16025	1.4471	0.07394	0.92606	0.14788	0.60668	FALSE
MED12_12	MED12	486.62/254.33/333.49	166.31/49.163/267.26	333.49	166.31	-0.99945	14857	13621	1.4464	0.074029	0.92597	0.14806	0.60717	FALSE
DARS_8	DARS	146.06/257.29/198.68	2.0789/92.653/76.088	198.68	76.088	-1.3731	3102.1	8114.9	1.446	0.074086	0.92591	0.14817	0.60717	FALSE
CERS6_7	CERS6	154.01/129.14/23.948	91.471/39.709/0	129.14	39.709	-1.6766	5841.9	5274.6	1.4452	0.074197	0.9258	0.14839	0.60736	FALSE
CHRNA3_6	CHRNA3	28.922/66.048/282.94	160.07/5.6727/16.169	66.048	16.169	-1.9654	24210	2697.7	1.4449	0.074247	0.92575	0.14849	0.60736	FALSE
SEC13_8	SEC13	130.87/42.389/205.77	40.538/16.073/121.74	130.87	40.538	-1.6666	6719.8	5345.5	1.4444	0.074314	0.92569	0.14863	0.60744	FALSE
VPS35_14	VPS35	221.98/65.062/168.52	59.248/66.181/0	168.52	59.248	-1.4925	6780.8	6883.1	1.4441	0.074357	0.92564	0.14871	0.60744	FALSE
EPAS1_14	EPAS1	123.64/370.66/286.49	97.708/214.62/133.15	286.49	133.15	-1.0996	16801	11701	1.4436	0.07443	0.92557	0.14886	0.60744	FALSE
BAGE2_2	BAGE2	284.16/241.52/84.261	102.91/92.653/187.37	241.52	102.91	-1.2228	13274	9864.6	1.4433	0.074462	0.92554	0.14892	0.60749	FALSE
KIAA1328_1	KIAA1328	84.598/111.39/164.09	32.223/20.8/130.3	111.39	32.223	-1.7583	1747.3	4549.8	1.4423	0.074607	0.92539	0.14921	0.60847	FALSE
PTAR1_11	PTAR1	321.76/490.92/377.84	211.01/184.36/199.73	377.84	199.73	-0.91633	7966	15433	1.4414	0.074735	0.92526	0.14947	0.60925	FALSE
COMMD2_15	COMMD2	471.44/375.59/436.38	432.41/225.96/244.43	436.38	244.43	-0.83356	2462.5	17824	1.4413	0.074752	0.92525	0.1495	0.60925	FALSE
CWC22_7	CWC22	49.891/229.69/128.61	38.46/39.709/80.844	128.61	39.709	-1.6708	8206.8	5252.9	1.4407	0.074838	0.92516	0.14968	0.60975	FALSE
MRPL28_6	MRPL28	309.47/23.659/229.72	95.629/196.65/78.942	229.72	95.629	-1.2556	24411	9382.8	1.44	0.074937	0.92506	0.14987	0.61035	FALSE
FAM156A_14	FAM156A	300.79/54.218/300.68	42.617/348.87/143.62	300.68	143.62	-1.0608	30371	12281	1.4387	0.075121	0.92488	0.15024	0.61103	FALSE
CAPN15_8	CAPN15	390.45/550.07/653.69	770.23/334.69/294.84	550.07	334.69	-0.71512	18107	22467	1.4377	0.075256	0.92474	0.15051	0.61167	FALSE
NFRKB_9	NFRKB	227.76/146.88/194.24	253.62/2.8363/74.186	194.24	74.186	-1.3767	1683.3	7933.7	1.4371	0.075349	0.92465	0.1507	0.61167	FALSE
AMTN_12	AMTN	134.49/101.54/64.748	102.91/3.7818/28.533	101.54	28.533	-1.7957	1219.7	4147.2	1.4369	0.075374	0.92463	0.15075	0.61167	FALSE
CCZ1_6	CCZ1	54.23/19.716/47.896	0/11.345/15.218	47.896	11.345	-1.9857	417.11	1956.3	1.4369	0.075375	0.92462	0.15075	0.61167	FALSE
SUMO2_1	SUMO2	120.75/296.72/201.34	179.82/78.472/76.088	201.34	78.472	-1.3483	7796.2	8223.5	1.4359	0.075521	0.92448	0.15104	0.61245	FALSE
LDLR_13	LDLR	182.93/342.07/195.13	74.84/159.78/60.871	195.13	74.84	-1.3708	10870	7969.9	1.4353	0.075595	0.9244	0.15119	0.61284	FALSE
TBX6_14	TBX6	338.39/298.69/340.59	166.31/276.07/171.2	338.39	171.2	-0.97888	790.41	13821	1.435	0.075645	0.92436	0.15129	0.61284	FALSE
TBX6_10	TBX6	530/432.76/491.37	615.35/288.36/283.43	491.37	288.36	-0.76689	2463.8	20070	1.4347	0.075684	0.92432	0.15137	0.6129	FALSE
GNB2L1_11	GNB2L1	57.122/136.04/125.06	38.46/2.8363/97.964	125.06	38.46	-1.6757	2368.1	5108	1.4341	0.075775	0.92423	0.15155	0.61304	FALSE
ELP5_4	ELP5	33.261/70.977/78.052	0/17.963/192.12	70.977	17.963	-1.9243	736.28	2899	1.4339	0.0758	0.9242	0.1516	0.61304	FALSE
PON1_11	PON1	258.86/98.579/444.36	122.65/115.34/108.43	258.86	115.34	-1.1593	30051	10573	1.4329	0.075941	0.92406	0.15188	0.61346	FALSE
CENPA_13	CENPA	44.107/40.417/170.3	136.17/0.94544/10.462	44.107	10.462	-1.9765	7968.6	1801.5	1.4327	0.075967	0.92403	0.15193	0.61346	FALSE
SEC61B_1	SEC61B	228.49/245.46/188.03	51.972/95.49/228.27	228.49	95.49	-1.25	962.27	9332.4	1.4327	0.075973	0.92403	0.15195	0.61346	FALSE
NonTargeting_Human_0163	NonTargeting_Human_0163	211.86/500.78/483.39	294.16/269.45/282.48	483.39	282.48	-0.77293	37016	19744	1.4317	0.076111	0.92389	0.15222	0.61387	FALSE
BID_3	BID	396.96/452.48/408.89	224.52/403.7/186.42	408.89	224.52	-0.86196	1021.2	16701	1.4316	0.076123	0.92388	0.15225	0.61387	FALSE
CCL14_10	CCL14	104.12/151.81/178.28	220.36/31.2/51.36	151.81	51.36	-1.5452	1487.4	6200.6	1.4314	0.076153	0.92385	0.15231	0.61391	FALSE
COMMD10_5	COMMD10	42.661/153.78/117.08	222.44/5.6727/35.191	117.08	35.191	-1.706	3442.6	4782	1.4297	0.076407	0.92359	0.15281	0.61498	FALSE
IRS1_12	IRS1	122.2/195.19/78.939	37.42/28.363/65.626	122.2	37.42	-1.681	3599.3	4991.1	1.4296	0.076423	0.92358	0.15285	0.61498	FALSE
NonTargeting_Human_0842	NonTargeting_Human_0842	329.72/386.43/142.8	541.55/65.236/165.49	329.72	165.49	-0.99013	19077	13467	1.4294	0.076438	0.92356	0.15288	0.61498	FALSE
BST2_6	BST2	308.75/403.19/574.75	499.97/143.71/220.66	403.19	220.66	-0.8667	19176	16468	1.4277	0.076682	0.92332	0.15336	0.61613	FALSE
DNAJC13_4	DNAJC13	459.14/318.41/431.06	242.19/276.07/131.25	431.06	242.19	-0.82914	6739.4	17606	1.4271	0.076775	0.92322	0.15355	0.61643	FALSE
WBSCR16_9	WBSCR16	104.84/82.806/204.89	195.42/30.254/0	104.84	30.254	-1.7598	5247.1	4282.3	1.4269	0.076808	0.92319	0.15362	0.61643	FALSE
IPO9_2	IPO9	317.42/289.82/554.35	148.64/161.67/156.93	317.42	156.93	-1.0116	28447	12965	1.4263	0.076894	0.92311	0.15379	0.61643	FALSE
GTF2A2_7	GTF2A2	49.168/185.33/61.2	3.1183/23.636/15.218	61.2	15.218	-1.9393	7776.3	2499.7	1.4263	0.076896	0.9231	0.15379	0.61643	FALSE
PPP1R8_6	PPP1R8	99.782/149.84/28.383	49.893/28.363/0	99.782	28.363	-1.7792	3801.8	4075.5	1.4244	0.077159	0.92284	0.15432	0.61706	FALSE
GTF3A_8	GTF3A	217.64/245.46/138.36	89.392/380.07/0	217.64	89.392	-1.2743	3529.3	8889.4	1.4242	0.077196	0.9228	0.15439	0.61706	FALSE
OR56A1_1	OR56A1	154.73/173.5/197.79	124.73/63.345/28.533	173.5	63.345	-1.4393	471.09	7086.4	1.4241	0.077212	0.92279	0.15442	0.61706	FALSE
ARHGEF35_3	ARHGEF35	379.61/270.11/168.52	191.26/123.85/43.751	270.11	123.85	-1.1186	11155	11032	1.424	0.077226	0.92277	0.15445	0.61706	FALSE
MED27_8	MED27	263.92/304.61/299.79	106.02/189.09/144.57	299.79	144.57	-1.0471	655.06	12245	1.4239	0.077234	0.92277	0.15447	0.61706	FALSE
SEC13_2	SEC13	39.768/228.7/107.32	80.037/19.854/31.386	107.32	31.386	-1.7419	9648.4	4383.5	1.4238	0.077253	0.92275	0.15451	0.61706	FALSE
MPDU1_10	MPDU1	410.7/52.247/307.77	137.21/150.33/210.19	307.77	150.33	-1.0289	37944	12571	1.4233	0.077326	0.92267	0.15465	0.61744	FALSE
SYP_7	SYP	105.57/448.53/259.88	165.27/97.381/116.99	259.88	116.99	-1.1448	29701	10615	1.4231	0.077354	0.92265	0.15471	0.61746	FALSE
TADA2A_15	TADA2A	254.52/219.83/396.47	77.958/113.45/315.77	254.52	113.45	-1.1587	10677	10396	1.4224	0.07746	0.92254	0.15492	0.6179	FALSE
POLR3H_9	POLR3H	269.7/204.06/384.94	158/123.85/113.18	269.7	123.85	-1.1165	8794.3	11016	1.4212	0.077628	0.92237	0.15526	0.61863	FALSE
PQBP1_2	PQBP1	121.47/310.52/196.02	53.012/76.581/356.66	196.02	76.581	-1.3445	9334.1	8006.2	1.4198	0.077838	0.92216	0.15568	0.61936	FALSE
HNRNPU_15	HNRNPU	249.46/293.76/214.64	154.88/83.199/110.33	249.46	110.33	-1.1697	1587.6	10189	1.4197	0.077845	0.92215	0.15569	0.61936	FALSE
UPP2_2	UPP2	153.29/190.26/46.122	170.47/52.945/0	153.29	52.945	-1.5161	6425.7	6261	1.4182	0.078073	0.92193	0.15615	0.62053	FALSE
NonTargeting_Human_0398	NonTargeting_Human_0398	329.72/248.42/309.55	259.86/119.13/152.18	309.55	152.18	-1.0196	2071.7	12643	1.418	0.078099	0.9219	0.1562	0.62053	FALSE
VPS51_13	VPS51	245.12/20.702/231.5	98.747/60.508/149.32	231.5	98.747	-1.2208	22310	9455.3	1.4177	0.078133	0.92187	0.15627	0.62053	FALSE
ARPC4_13	ARPC4	99.059/321.37/0	75.88/28.363/10.462	99.059	28.363	-1.7688	29617	4046	1.4175	0.078162	0.92184	0.15632	0.62053	FALSE
NonTargeting_Human_0080	NonTargeting_Human_0080	161.24/219.83/206.66	117.46/83.199/53.262	206.66	83.199	-1.3024	1118.1	8440.9	1.4172	0.078219	0.92178	0.15644	0.62053	FALSE
BRD2_6	BRD2	74.475/184.34/189.81	123.69/69.963/54.213	184.34	69.963	-1.3851	6050.3	7529.3	1.4171	0.078223	0.92178	0.15645	0.62053	FALSE
POLRMT_15	POLRMT	83.875/106.47/0	17.671/56.727/22.827	83.875	22.827	-1.8328	3772.7	3425.8	1.4152	0.078503	0.9215	0.15701	0.62222	FALSE
KCNK4_3	KCNK4	216.92/576.69/344.14	185.02/112.51/177.86	344.14	177.86	-0.94837	35132	14056	1.414	0.078674	0.92133	0.15735	0.62272	FALSE
USP22_11	USP22	122.92/0/83.374	1.0394/22.691/91.306	83.374	22.691	-1.8325	4257.6	3405.3	1.414	0.078676	0.92132	0.15735	0.62272	FALSE
USP22_13	USP22	229.21/129.14/275.84	97.708/18.909/171.2	229.21	97.708	-1.2217	6094.5	9361.9	1.4129	0.078841	0.92116	0.15768	0.62362	FALSE
EIF3C_3	EIF3C	102.67/22.673/92.243	25.986/23.636/55.164	92.243	25.986	-1.7888	2474.4	3767.6	1.4118	0.078999	0.921	0.158	0.62393	FALSE
GET4_12	GET4	344.9/85.764/308.66	97.708/152.22/223.51	308.66	152.22	-1.0151	25498	12607	1.4118	0.079008	0.92099	0.15802	0.62393	FALSE
MESDC2_15	MESDC2	100.51/298.69/211.98	76.919/86.981/105.57	211.98	86.981	-1.2755	9973	8658.3	1.4111	0.079114	0.92089	0.15823	0.62431	FALSE
TMEM67_11	TMEM67	378.88/532.33/528.62	265.06/321.45/500.28	528.62	321.45	-0.71589	11218	21591	1.4109	0.079133	0.92087	0.15827	0.62431	FALSE
MRPS31_1	MRPS31	117.14/205.04/62.974	20.789/168.29/36.142	117.14	36.142	-1.6693	5330.7	4784.3	1.4104	0.079204	0.9208	0.15841	0.62468	FALSE
CDC73_5	CDC73	127.26/18.73/95.791	0/27.418/84.648	95.791	27.418	-1.7681	3464.3	3912.5	1.4096	0.079329	0.92067	0.15866	0.62528	FALSE
ATP5F1_9	ATP5F1	185.1/126.18/154.33	54.051/126.69/14.267	154.33	54.051	-1.4965	869.69	6303.5	1.4092	0.07939	0.92061	0.15878	0.62528	FALSE
FURIN_6	FURIN	165.58/286.86/282.94	74.84/134.25/223.51	282.94	134.25	-1.0699	6894.1	11556	1.4091	0.079408	0.92059	0.15882	0.62528	FALSE
PTPMT1_15	PTPMT1	260.3/488.95/331.72	298.32/120.07/169.3	331.72	169.3	-0.96626	14911	13549	1.4089	0.079434	0.92057	0.15887	0.62528	FALSE
SETD1A_11	SETD1A	200.29/275.03/70.956	80.037/41.599/204.49	200.29	80.037	-1.3126	11157	8180.6	1.4084	0.079504	0.9205	0.15901	0.62563	FALSE
STARD4_5	STARD4	65.799/102.52/126.83	1.0394/30.254/96.062	102.52	30.254	-1.7278	969.86	4187.4	1.405	0.080007	0.91999	0.16001	0.62845	FALSE
GPN2_6	GPN2	39.045/151.81/157.88	53.012/23.636/77.991	151.81	53.012	-1.5004	6376.5	6200.6	1.405	0.080017	0.91998	0.16003	0.62845	FALSE
BOLA2_11	BOLA2	126.54/232.65/78.939	38.46/40.654/102.72	126.54	40.654	-1.6144	6762.4	5168.3	1.4047	0.080062	0.91994	0.16012	0.6286	FALSE
NonTargeting_Human_0703	NonTargeting_Human_0703	241.5/237.57/125.95	103.94/51.054/326.23	237.57	103.94	-1.1848	6238	9703.6	1.404	0.080159	0.91984	0.16032	0.62883	FALSE
SNAPC2_13	SNAPC2	113.52/204.06/180.05	151.76/34.036/68.48	180.05	68.48	-1.3817	2501.4	7354.1	1.4039	0.080173	0.91983	0.16035	0.62883	FALSE
PAM16_13	PAM16	107.01/95.621/31.93	0/85.09/27.582	95.621	27.582	-1.7572	2093.2	3905.6	1.4038	0.080191	0.91981	0.16038	0.62883	FALSE
KIAA1432_6	KIAA1432	62.183/3.9432/74.504	3.1183/16.073/169.3	62.183	16.073	-1.8879	1771.9	2539.8	1.4038	0.080194	0.91981	0.16039	0.62883	FALSE
TBXAS1_15	TBXAS1	323.93/347.98/229.72	164.23/524.72/126.5	323.93	164.23	-0.97564	4727	13231	1.4032	0.080275	0.91972	0.16055	0.62926	FALSE
RANBP1_9	RANBP1	170.64/101.54/238.59	145.52/63.345/25.68	170.64	63.345	-1.4155	4696.3	6969.8	1.4015	0.080527	0.91947	0.16105	0.62978	FALSE
COG5_6	COG5	41.938/0/70.069	0/58.617/10.462	41.938	10.462	-1.9054	1275.1	1712.9	1.4015	0.080536	0.91946	0.16107	0.62978	FALSE
COPS2_4	COPS2	167.75/139/124.17	46.775/45.381/140.76	139	46.775	-1.5511	523.25	5677.2	1.4012	0.08057	0.91943	0.16114	0.62978	FALSE
HIST2H3A_4	HIST2H3A	125.09/188.29/141.91	8.3156/48.218/152.18	141.91	48.218	-1.5379	1216.7	5796.3	1.4012	0.080573	0.91943	0.16115	0.62978	FALSE
ZNHIT1_13	ZNHIT1	156.9/291.79/313.09	141.36/173.96/132.2	291.79	141.36	-1.0403	9324.4	11918	1.4007	0.080655	0.91934	0.16131	0.63006	FALSE
RPL13A_15	RPL13A	132.32/87.735/38.139	1.0394/160.73/24.729	87.735	24.729	-1.7861	2223.8	3583.5	1.4006	0.080661	0.91934	0.16132	0.63006	FALSE
ITGA1_13	ITGA1	82.429/313.48/171.18	148.64/36.872/63.724	171.18	63.724	-1.4116	14063	6991.8	1.4004	0.080696	0.9193	0.16139	0.63013	FALSE
PFDN2_5	PFDN2	279.82/645.69/355.67	188.14/137.09/426.1	355.67	188.14	-0.91513	44933	14527	1.3996	0.080815	0.91919	0.16163	0.63065	FALSE
VPS29_3	VPS29	96.167/167.58/185.37	78.998/0/61.822	167.58	61.822	-1.4241	2708.4	6844.8	1.3991	0.080892	0.91911	0.16178	0.63087	FALSE
RBM3_11	RBM3	31.092/166.6/186.26	61.327/190.98/42.8	166.6	61.327	-1.4271	9374.3	6804.6	1.3984	0.080995	0.919	0.16199	0.63106	FALSE
CDC73_8	CDC73	58.568/82.806/37.252	0/15.127/37.093	58.568	15.127	-1.8851	520.93	2392.2	1.3982	0.081022	0.91898	0.16204	0.63106	FALSE
DPY30_4	DPY30	156.9/61.119/109.1	0/141.82/33.289	109.1	33.289	-1.6829	2293.7	4455.9	1.3977	0.081103	0.9189	0.16221	0.63129	FALSE
GAGE1_10	GAGE1	267.53/325.31/44.348	124.73/288.36/75.137	267.53	124.73	-1.0947	26575	10927	1.3974	0.081141	0.91886	0.16228	0.63138	FALSE
RANBP1_15	RANBP1	308.75/416.99/356.56	228.68/189.09/178.81	356.56	189.09	-0.9115	2968.9	14563	1.3972	0.081173	0.91883	0.16235	0.63144	FALSE
SCARB1_14	SCARB1	449.74/502.75/392.92	260.9/229.74/496.48	449.74	260.9	-0.78329	3019.3	18369	1.3961	0.081345	0.91866	0.16269	0.63257	FALSE
PROX1_14	PROX1	438.17/350.94/360.1	245.31/191.92/77.04	360.1	191.92	-0.90437	3089.5	14708	1.3958	0.081391	0.91861	0.16278	0.63257	FALSE
PGM3_15	PGM3	70.86/78.863/131.27	95.629/21.745/0	78.863	21.745	-1.812	1405.2	3221.1	1.3951	0.081487	0.91851	0.16297	0.63304	FALSE
UBE2I_2	UBE2I	194.5/360.8/284.71	422.02/58.617/136.96	284.71	136.96	-1.0503	6963.4	11629	1.395	0.081515	0.91849	0.16303	0.63304	FALSE
PTPMT1_14	PTPMT1	493.13/223.77/282.05	135.13/169.23/58.017	282.05	135.13	-1.0561	23975	11520	1.3946	0.081574	0.91843	0.16315	0.63304	FALSE
GNB2L1_12	GNB2L1	0/106.47/116.19	40.538/22.691/32.338	106.47	32.338	-1.6886	5714.7	4348.5	1.3943	0.081616	0.91838	0.16323	0.63304	FALSE
CWC22_13	CWC22	176.43/304.61/102	64.446/67.126/119.84	176.43	67.126	-1.3809	10985	7206	1.3941	0.081645	0.91835	0.16329	0.63304	FALSE
CHD7_3	CHD7	286.33/245.46/119.74	110.18/183.42/106.52	245.46	110.18	-1.1484	8738.3	10026	1.393	0.081806	0.91819	0.16361	0.63393	FALSE
CCDC169-SOHLH2_12	CCDC169-SOHLH2	167.75/180.4/167.63	62.367/247.71/53.262	167.75	62.367	-1.4131	80.006	6851.6	1.3925	0.081881	0.91812	0.16376	0.63411	FALSE
NonTargeting_Human_0138	NonTargeting_Human_0138	313.09/208/352.12	509.33/142.76/157.88	313.09	157.88	-0.98319	6283.2	12788	1.3893	0.082377	0.91762	0.16475	0.63694	FALSE
LAS1L_15	LAS1L	16.63/68.019/21.287	3.1183/5.6727/76.088	21.287	5.6727	-1.7399	1102.8	869.45	1.3889	0.082429	0.91757	0.16486	0.63695	FALSE
INSR_1	INSR	68.691/203.07/115.3	36.381/0/155.98	115.3	36.381	-1.6375	4938	4709.5	1.3889	0.08243	0.91757	0.16486	0.63695	FALSE
PPIL2_13	PPIL2	76.644/145.9/165.86	116.42/51.054/50.409	145.9	51.054	-1.4967	2597.2	5959	1.3874	0.082656	0.91734	0.16531	0.63715	FALSE
NUDT17_4	NUDT17	140.27/187.3/86.922	89.392/48.218/0	140.27	48.218	-1.5212	2528.9	5729.4	1.3873	0.08267	0.91733	0.16534	0.63715	FALSE
UXT_9	UXT	11.569/72.948/80.713	61.327/0/19.973	72.948	19.973	-1.818	1913.9	2979.5	1.3872	0.082691	0.91731	0.16538	0.63715	FALSE
KLC2_3	KLC2	161.24/253.35/243.03	109.14/285.52/51.36	243.03	109.14	-1.1477	3397.5	9926.2	1.3868	0.082756	0.91724	0.16551	0.63716	FALSE
METAP1D_2	METAP1D	133.04/191.24/132.16	132.01/39.709/44.702	133.04	44.702	-1.5524	1694	5434.1	1.3867	0.082771	0.91723	0.16554	0.63716	FALSE
UXT_1	UXT	20.246/132.1/72.73	0/58.617/19.973	72.73	19.973	-1.8137	3139.4	2970.6	1.3848	0.08306	0.91694	0.16612	0.63796	FALSE
NRBP1_4	NRBP1	147.5/44.36/143.69	47.815/50.108/108.43	143.69	50.108	-1.5013	4940.1	5868.8	1.3844	0.083113	0.91689	0.16623	0.63796	FALSE
NID1_2	NID1	25.307/277.01/251.9	165.27/115.34/40.898	251.9	115.34	-1.1201	25986	10288	1.3842	0.083148	0.91685	0.1663	0.63796	FALSE
MORC2_15	MORC2	239.33/102.52/231.5	80.037/298.76/101.77	231.5	101.77	-1.1778	8347.8	9455.3	1.3841	0.083162	0.91684	0.16632	0.63796	FALSE
RAB7A_12	RAB7A	289.95/355.87/260.76	363.81/141.82/123.64	289.95	141.82	-1.0266	2598.7	11843	1.3839	0.08319	0.91681	0.16638	0.63797	FALSE
PSMD5_11	PSMD5	104.84/102.52/100.23	18.71/31.2/75.137	102.52	31.2	-1.6848	5.3315	4187.4	1.3829	0.083346	0.91665	0.16669	0.63877	FALSE
CREB5_14	CREB5	256.69/346.01/198.68	159.04/97.381/118.89	256.69	118.89	-1.1039	5672	10484	1.3812	0.083605	0.9164	0.16721	0.64001	FALSE
PGS1_6	PGS1	117.14/157.73/183.6	29.104/57.672/89.404	157.73	57.672	-1.4358	1158.5	6442.2	1.381	0.083642	0.91636	0.16728	0.64001	FALSE
VOPP1_1	VOPP1	442.51/1026.2/668.76	432.41/440.58/714.28	668.76	440.58	-0.60099	89477	27315	1.3808	0.083666	0.91633	0.16733	0.64001	FALSE
CABIN1_4	CABIN1	52.783/209.97/237.7	88.353/142.76/77.04	209.97	88.353	-1.2395	12739	8576.2	1.3797	0.083839	0.91616	0.16768	0.64001	FALSE
DARS_5	DARS	0/50.275/47.896	12.473/12.291/27.582	47.896	12.473	-1.8596	1149.8	1956.3	1.3795	0.083867	0.91613	0.16773	0.64001	FALSE
ATP6AP2_9	ATP6AP2	18.8/3.9432/19.513	5.1972/21.745/0	18.8	5.1972	-1.6758	110.61	767.86	1.3795	0.083871	0.91613	0.16774	0.64001	FALSE
WDR55_11	WDR55	120.75/249.4/256.33	149.68/86.981/114.13	249.4	114.13	-1.121	8299.8	10187	1.3792	0.08391	0.91609	0.16782	0.64001	FALSE
TAF2_11	TAF2	221.26/173.5/398.24	95.629/149.38/60.871	221.26	95.629	-1.2017	16802	9037.1	1.3784	0.084033	0.91597	0.16807	0.64001	FALSE
NonTargeting_Human_0988	NonTargeting_Human_0988	266.81/191.24/67.409	231.8/56.727/77.04	191.24	77.04	-1.3007	10523	7811.2	1.3774	0.084194	0.91581	0.16839	0.64085	FALSE
CHD7_14	CHD7	466.37/348.97/438.16	108.1/254.32/418.49	438.16	254.32	-0.7824	4375.3	17896	1.3773	0.084211	0.91579	0.16842	0.64085	FALSE
LAMTOR4_14	LAMTOR4	216.2/374.6/71.843	92.511/340.36/68.48	216.2	92.511	-1.2158	22965	8830.3	1.3771	0.084248	0.91575	0.1685	0.64085	FALSE
SETD1A_9	SETD1A	135.21/207.02/109.1	77.958/46.327/33.289	135.21	46.327	-1.5251	2918.9	5522.6	1.3766	0.084315	0.91568	0.16863	0.64107	FALSE
CEBPZ_12	CEBPZ	57.122/124.21/54.104	187.1/5.6727/15.218	57.122	15.218	-1.8415	2254.9	2333.1	1.3765	0.084329	0.91567	0.16866	0.64107	FALSE
FRY_8	FRY	349.96/259.26/266.97	60.288/209.89/126.5	266.97	126.5	-1.0716	3473.2	10904	1.3759	0.084434	0.91557	0.16887	0.64144	FALSE
HSD17B10_10	HSD17B10	736.8/137.02/435.49	252.59/210.83/293.89	435.49	252.59	-0.78349	89934	17787	1.3747	0.084618	0.91538	0.16924	0.64186	FALSE
hsa-mir-1302-6_3	hsa-mir-1302-6	116.41/3.9432/85.148	156.96/17.963/24.729	85.148	24.729	-1.7434	3785.8	3477.8	1.3741	0.084705	0.9153	0.16941	0.64212	FALSE
USP39_4	USP39	6.5075/65.062/23.061	6.2367/0.94544/17.12	23.061	6.2367	-1.7333	1019.1	941.9	1.3738	0.084745	0.91525	0.16949	0.64223	FALSE
SLC35F5_15	SLC35F5	123.64/250.39/292.7	0/115.34/338.59	250.39	115.34	-1.1115	8927.2	10227	1.3735	0.084794	0.91521	0.16959	0.6424	FALSE
SLC35A2_15	SLC35A2	0.72306/398.26/240.36	70.682/108.73/219.71	240.36	108.73	-1.1373	41179	9817.5	1.3721	0.085009	0.91499	0.17002	0.64323	FALSE
SETD1A_7	SETD1A	298.62/353.9/174.73	180.86/104/149.32	298.62	149.32	-0.99508	9202.5	12197	1.3717	0.085075	0.91493	0.17015	0.64323	FALSE
JAK1_13	JAK1	383.22/594.43/503.79	390.83/307.27/268.21	503.79	307.27	-0.7115	11376	20577	1.3713	0.085141	0.91486	0.17028	0.64323	FALSE
FAM126A_8	FAM126A	49.891/69.005/0	3.1183/13.236/54.213	49.891	13.236	-1.8379	1427.2	2037.8	1.37	0.085344	0.91466	0.17069	0.64437	FALSE
AKAP9_7	AKAP9	111.35/98.579/49.669	30.144/87.926/0	98.579	30.144	-1.6769	1277.6	4026.4	1.3697	0.085396	0.9146	0.17079	0.64456	FALSE
CHMP1A_1	CHMP1A	258.13/102.52/232.38	109.14/56.727/103.67	232.38	103.67	-1.1568	8763.4	9491.5	1.3695	0.085422	0.91458	0.17084	0.64456	FALSE
WDR7_11	WDR7	81.706/68.019/0	1.0394/18.909/94.159	68.019	18.909	-1.7936	2407	2778.2	1.3675	0.085734	0.91427	0.17147	0.64624	FALSE
MSTO1_13	MSTO1	431.67/563.87/517.09	353.41/299.71/318.62	517.09	318.62	-0.69686	4742.9	21120	1.3668	0.085847	0.91415	0.17169	0.64624	FALSE
GIGYF2_12	GIGYF2	274.04/233.63/314.87	89.392/132.36/166.44	274.04	132.36	-1.0443	1649.9	11193	1.3666	0.085877	0.91412	0.17175	0.64624	FALSE
KLHDC7B_12	KLHDC7B	426.61/314.47/424.85	355.49/183.42/245.39	424.85	245.39	-0.78943	6094	17353	1.366	0.085964	0.91404	0.17193	0.64625	FALSE
GPBP1L1_9	GPBP1L1	52.783/234.62/120.63	39.499/41.599/39.946	120.63	39.946	-1.5706	8798.3	4926.9	1.3656	0.086028	0.91397	0.17206	0.64635	FALSE
PDGFA_5	PDGFA	348.52/285.88/207.55	393.95/140.87/53.262	285.88	140.87	-1.0159	5029.6	11676	1.3653	0.086081	0.91392	0.17216	0.64635	FALSE
COPS8_11	COPS8	184.38/436.7/309.55	158/145.6/229.22	309.55	158	-0.96582	15918	12643	1.3648	0.08616	0.91384	0.17232	0.64635	FALSE
NCBP2_15	NCBP2	10.123/86.749/117.96	31.183/0/25.68	86.749	25.68	-1.7176	3423	3543.2	1.3645	0.0862	0.9138	0.1724	0.64635	FALSE
WDR82_14	WDR82	232.83/140.97/224.4	44.696/158.83/98.915	224.4	98.915	-1.1737	3515.9	9165.4	1.3642	0.086257	0.91374	0.17251	0.64635	FALSE
BMI1_12	BMI1	102.67/83.792/62.087	0/24.582/179.76	83.792	24.582	-1.7288	413.83	3422.4	1.3641	0.086271	0.91373	0.17254	0.64635	FALSE
NonTargeting_Human_0099	NonTargeting_Human_0099	117.14/87.735/138.36	38.46/35.927/64.675	117.14	38.46	-1.582	657.54	4784.3	1.3633	0.086396	0.9136	0.17279	0.64652	FALSE
PON1_10	PON1	381.78/290.81/182.71	333.66/144.65/67.529	290.81	144.65	-1.0025	9979.9	11878	1.3628	0.08647	0.91353	0.17294	0.64652	FALSE
GTF2H2_10	GTF2H2	107.74/78.863/55.878	32.223/15.127/22.827	78.863	22.827	-1.745	680.98	3221.1	1.3625	0.086527	0.91347	0.17305	0.64652	FALSE
BAGE2_11	BAGE2	170.64/243.49/209.32	70.682/279.85/89.404	209.32	89.404	-1.2181	1331.8	8549.6	1.3623	0.086559	0.91344	0.17312	0.64652	FALSE
C2orf49_14	C2orf49	99.782/288.84/154.33	28.065/140.87/57.066	154.33	57.066	-1.4196	10534	6303.5	1.3622	0.086564	0.91344	0.17313	0.64652	FALSE
NonTargeting_Human_0899	NonTargeting_Human_0899	95.444/112.38/121.51	36.381/30.254/82.746	112.38	36.381	-1.6008	185.12	4590.1	1.362	0.086606	0.91339	0.17321	0.64652	FALSE
NXF2_13	NXF2	146.78/66.048/98.452	2.0789/211.78/30.435	98.452	30.435	-1.6616	1692.9	4021.2	1.3615	0.086685	0.91332	0.17337	0.64652	FALSE
SNAPC3_12	SNAPC3	80.983/81.82/1.7739	0/23.636/90.355	80.983	23.636	-1.7345	3137.4	3307.7	1.3614	0.086699	0.9133	0.1734	0.64652	FALSE
CABIN1_7	CABIN1	73.029/167.58/43.461	77.958/20.8/0	73.029	20.8	-1.7638	4907.4	2982.8	1.3612	0.086727	0.91327	0.17345	0.64652	FALSE
VPS35_11	VPS35	96.89/132.1/100.23	31.183/83.199/30.435	100.23	31.183	-1.6532	513.4	4093.7	1.3611	0.086738	0.91326	0.17348	0.64652	FALSE
CDC14A_4	CDC14A	117.14/126.18/179.16	152.8/24.582/42.8	126.18	42.8	-1.5379	1444.6	5153.8	1.3611	0.086741	0.91326	0.17348	0.64652	FALSE
MSTO1_8	MSTO1	107.01/233.63/144.57	127.85/51.999/38.995	144.57	51.999	-1.4577	4671.1	5905	1.3607	0.0868	0.9132	0.1736	0.64676	FALSE
NFRKB_2	NFRKB	98.336/0/130.38	85.235/21.745/30.435	98.336	30.435	-1.6599	5348.5	4016.5	1.3603	0.086864	0.91314	0.17373	0.64677	FALSE
NonTargeting_Human_0185	NonTargeting_Human_0185	553.86/426.85/71.843	122.65/247.71/387.1	426.85	247.71	-0.78265	71080	17434	1.3603	0.086875	0.91313	0.17375	0.64677	FALSE
KIF3C_3	KIF3C	280.55/333.2/468.31	168.39/370.61/175.95	333.2	175.95	-0.91732	10514	13609	1.3602	0.08689	0.91311	0.17378	0.64677	FALSE
SULT1A2_13	SULT1A2	127.98/57.176/181.83	103.94/38.763/43.751	127.98	43.751	-1.5272	3956.3	5227.3	1.3595	0.086991	0.91301	0.17398	0.64677	FALSE
IRS1_4	IRS1	199.56/205.04/505.56	177.75/86.981/39.946	205.04	86.981	-1.2277	45171	8374.9	1.359	0.087071	0.91293	0.17414	0.64677	FALSE
FAM57B_9	FAM57B	21.692/165.61/131.27	74.84/45.381/37.093	131.27	45.381	-1.5119	6593.3	5361.6	1.359	0.087076	0.91292	0.17415	0.64677	FALSE
SNX19_12	SNX19	288.5/130.12/308.66	143.44/334.69/119.84	288.5	143.44	-1.0031	12745	11784	1.3586	0.087136	0.91286	0.17427	0.64677	FALSE
GTF3A_11	GTF3A	255.24/172.51/229.72	102.91/166.4/59.92	229.72	102.91	-1.1509	1962	9382.8	1.3585	0.087148	0.91285	0.1743	0.64677	FALSE
PIK3R4_8	PIK3R4	53.506/59.147/0	14.552/18.909/0	53.506	14.552	-1.8093	1447.4	2185.4	1.3585	0.087148	0.91285	0.1743	0.64677	FALSE
TMEM183A_12	TMEM183A	289.22/540.21/357.44	194.38/388.58/191.17	357.44	194.38	-0.87549	19029	14599	1.3584	0.087165	0.91283	0.17433	0.64677	FALSE
DARS_2	DARS	115.69/163.64/56.765	0/85.09/38.044	115.69	38.044	-1.5795	2885.7	4725.3	1.3584	0.087172	0.91283	0.17434	0.64677	FALSE
EBP_9	EBP	243.67/103.51/258.1	112.26/200.43/35.191	243.67	112.26	-1.1112	9927.1	9952.6	1.3581	0.087223	0.91278	0.17445	0.64677	FALSE
ZW10_4	ZW10	113.52/123.22/81.6	20.789/54.836/37.093	113.52	37.093	-1.588	556.54	4636.7	1.3578	0.08727	0.91273	0.17454	0.64677	FALSE
DYRK1A_12	DYRK1A	353.58/41.403/199.56	118.5/23.636/83.697	199.56	83.697	-1.2437	24367	8151.1	1.3574	0.087325	0.91268	0.17465	0.64677	FALSE
TBXAS1_5	TBXAS1	301.52/412.06/341.48	473.99/182.47/132.2	341.48	182.47	-0.90046	3289.3	13947	1.3573	0.087339	0.91266	0.17468	0.64677	FALSE
INTS6_3	INTS6	79.537/0/66.522	18.71/0/20.924	66.522	18.71	-1.7764	2297.3	2717	1.357	0.087384	0.91262	0.17477	0.64677	FALSE
STXBP5L_3	STXBP5L	48.445/142.94/66.522	18.71/0/32.338	66.522	18.71	-1.7764	3083.2	2717	1.357	0.087384	0.91262	0.17477	0.64677	FALSE
ZNF764_9	ZNF764	357.92/514.58/237.7	371.08/194.76/194.98	357.92	194.98	-0.87296	19498	14619	1.3564	0.087488	0.91251	0.17498	0.64714	FALSE
GPR52_14	GPR52	34.707/138.01/48.783	3.1183/13.236/135.06	48.783	13.236	-1.8061	4079.9	1992.5	1.3549	0.08773	0.91227	0.17546	0.64835	FALSE
HNRNPU_11	HNRNPU	421.54/199.13/293.58	147.6/170.18/85.6	293.58	147.6	-0.98722	12648	11991	1.3538	0.087901	0.9121	0.1758	0.64921	FALSE
NUDT17_5	NUDT17	80.26/139/79.826	114.34/23.636/18.071	80.26	23.636	-1.7218	1725.1	3278.2	1.3536	0.087927	0.91207	0.17585	0.64921	FALSE
SDHAF1_7	SDHAF1	120.75/127.17/66.522	80.037/40.654/0	120.75	40.654	-1.5474	1491	4932	1.353	0.088029	0.91197	0.17606	0.64977	FALSE
RHOT2_6	RHOT2	173.53/250.39/72.73	57.17/85.09/68.48	173.53	68.48	-1.3289	8034.1	7087.9	1.3523	0.088136	0.91186	0.17627	0.64998	FALSE
TRIM8_5	TRIM8	240.06/336.15/313.98	72.761/162.62/323.38	313.98	162.62	-0.94495	2978.3	12824	1.3523	0.088137	0.91186	0.17627	0.64998	FALSE
COPS8_15	COPS8	234.27/304.61/130.38	94.59/169.23/106.52	234.27	106.52	-1.1297	7870.1	9568.7	1.3519	0.088206	0.91179	0.17641	0.65001	FALSE
NonTargeting_Human_0736	NonTargeting_Human_0736	420.1/242.5/355.67	48.854/193.82/273.92	355.67	193.82	-0.87248	8478.7	14527	1.3518	0.088213	0.91179	0.17643	0.65001	FALSE
ARPC3_3	ARPC3	135.21/0/80.713	23.907/30.254/0	80.713	23.907	-1.714	4742.4	3296.7	1.3506	0.088407	0.91159	0.17681	0.65033	FALSE
MRPL21_14	MRPL21	61.46/149.84/106.43	34.302/56.727/24.729	106.43	34.302	-1.6056	1953.4	4347.2	1.3504	0.088446	0.91155	0.17689	0.65033	FALSE
ARHGEF35_15	ARHGEF35	69.414/201.1/211.98	85.235/0/116.03	201.1	85.235	-1.2287	8729.9	8213.8	1.3502	0.088471	0.91153	0.17694	0.65033	FALSE
INO80D_14	INO80D	135.21/337.14/268.75	196.46/76.581/130.3	268.75	130.3	-1.0387	11255	10977	1.3502	0.088479	0.91152	0.17696	0.65033	FALSE
XAGE1A_10	XAGE1A	231.38/9.8579/229.72	67.564/140.87/103.67	229.72	103.67	-1.1403	24171	9382.8	1.35	0.088504	0.9115	0.17701	0.65033	FALSE
CCDC115_10	CCDC115	169.92/154.77/119.74	58.209/50.108/170.25	154.77	58.209	-1.3955	728.31	6321.4	1.3483	0.088781	0.91122	0.17756	0.65178	FALSE
ZNF143_10	ZNF143	117.86/0/71.843	0/20.8/79.893	71.843	20.8	-1.7405	3639.4	2934.4	1.3478	0.088854	0.91115	0.17771	0.65192	FALSE
SYTL3_4	SYTL3	194.5/282.92/213.76	93.55/68.072/182.61	213.76	93.55	-1.1835	2577.2	8730.7	1.3466	0.089047	0.91095	0.17809	0.65303	FALSE
BAGE2_1	BAGE2	37.599/69.005/70.956	40.538/19.854/0	69.005	19.854	-1.7471	495.07	2818.5	1.3466	0.089059	0.91094	0.17812	0.65303	FALSE
COPS3_15	COPS3	240.06/8.8721/294.47	111.22/146.54/26.631	240.06	111.22	-1.103	28203	9804.9	1.343	0.08963	0.91037	0.17926	0.6552	FALSE
STRAP_11	STRAP	193.78/120.27/263.43	5.1972/81.308/103.67	193.78	81.308	-1.2427	5127.4	7914.8	1.3426	0.089695	0.9103	0.17939	0.6552	FALSE
UBE2G2_12	UBE2G2	252.35/172.51/167.63	68.603/32.145/163.59	172.51	68.603	-1.3178	3198.7	7046.2	1.3424	0.089737	0.91026	0.17947	0.6552	FALSE
hsa-mir-532_12	hsa-mir-532	338.39/30.559/485.16	181.9/150.33/338.59	338.39	181.9	-0.89187	58152	13821	1.3422	0.08976	0.91024	0.17952	0.6552	FALSE
MRPS21_4	MRPS21	84.598/114.35/63.861	5.1972/30.254/25.68	84.598	25.68	-1.6818	657.65	3455.3	1.3421	0.089784	0.91022	0.17957	0.6552	FALSE
RALGAPA1_13	RALGAPA1	212.58/233.63/47.009	111.22/77.526/93.208	212.58	93.208	-1.1808	13929	8682.7	1.3418	0.089832	0.91017	0.17966	0.6552	FALSE
NonTargeting_Human_0520	NonTargeting_Human_0520	87.49/224.76/266.09	21.828/101.16/311.01	224.76	101.16	-1.1439	10275	9180.1	1.3414	0.089889	0.91011	0.17978	0.6552	FALSE
POLR3H_1	POLR3H	102.67/0.98579/173.84	29.104/33.09/50.409	102.67	33.09	-1.6046	7702.8	4193.7	1.3411	0.089944	0.91006	0.17989	0.6552	FALSE
PDGFA_14	PDGFA	392.62/269.12/443.48	223.48/21.745/291.04	392.62	223.48	-0.81022	8919.5	16036	1.3411	0.089951	0.91005	0.1799	0.6552	FALSE
INO80D_5	INO80D	394.07/210.96/105.55	163.19/74.69/92.257	210.96	92.257	-1.1845	22320	8616.4	1.3407	0.090003	0.91	0.18001	0.6552	FALSE
KLC2_14	KLC2	76.644/203.07/199.56	155.92/85.09/10.462	199.56	85.09	-1.2202	7560.9	8151.1	1.3402	0.090089	0.90991	0.18018	0.6552	FALSE
COMMD10_7	COMMD10	27.476/205.04/144.57	37.42/130.47/53.262	144.57	53.262	-1.4237	8684.2	5905	1.3401	0.090103	0.9099	0.18021	0.6552	FALSE
SP140_2	SP140	131.6/81.82/134.82	57.17/0/46.604	131.6	46.604	-1.4779	1244	5375	1.3401	0.090113	0.90989	0.18023	0.6552	FALSE
INTS2_15	INTS2	459.87/526.41/475.41	288.97/237.31/540.23	475.41	288.97	-0.71631	1421.4	19418	1.3398	0.090161	0.90984	0.18032	0.6552	FALSE
NonTargeting_Human_0772	NonTargeting_Human_0772	172.09/127.17/136.59	35.341/49.163/159.79	136.59	49.163	-1.4557	674.44	5579	1.3394	0.09022	0.90978	0.18044	0.6552	FALSE
ATP5I_9	ATP5I	214.75/353.9/318.42	167.35/186.25/36.142	318.42	167.35	-0.92397	6002.9	13005	1.3392	0.090261	0.90974	0.18052	0.6552	FALSE
NonTargeting_Human_0802	NonTargeting_Human_0802	62.906/139.98/227.06	50.933/144.65/0	139.98	50.933	-1.4408	6761.7	5717.5	1.339	0.090292	0.90971	0.18058	0.6552	FALSE
NonTargeting_Human_0866	NonTargeting_Human_0866	91.106/205.04/35.478	80.037/28.363/0	91.106	28.363	-1.6493	8038.2	3721.1	1.3389	0.090304	0.9097	0.18061	0.6552	FALSE
PKD1_2	PKD1	284.16/274.05/146.35	158/135.2/124.59	274.05	135.2	-1.014	8205	11193	1.3387	0.09033	0.90967	0.18066	0.6552	FALSE
CHP1_11	CHP1	155.46/342.07/340.59	183.98/397.09/178.81	340.59	183.98	-0.88488	17138	13911	1.3386	0.090357	0.90964	0.18071	0.6552	FALSE
EIF2S2_9	EIF2S2	44.107/57.176/70.956	22.868/0/16.169	57.176	16.169	-1.7606	180.35	2335.3	1.3384	0.090386	0.90961	0.18077	0.6552	FALSE
ACTR3_15	ACTR3	98.336/123.22/144.57	42.617/18.909/45.653	123.22	42.617	-1.51	537.6	5033	1.3379	0.090463	0.90954	0.18093	0.6552	FALSE
DYRK1A_7	DYRK1A	208.24/75.906/318.42	56.13/90.762/164.54	208.24	90.762	-1.1892	14826	8505.5	1.3379	0.090472	0.90953	0.18094	0.6552	FALSE
ORMDL1_14	ORMDL1	206.07/45.346/221.74	89.392/141.82/84.648	206.07	89.392	-1.1959	13039	8416.9	1.3377	0.090492	0.90951	0.18098	0.6552	FALSE
KRTAP13-2_4	KRTAP13-2	455.53/367.7/291.81	204.77/141.82/345.25	367.7	204.77	-0.8414	6736.7	15018	1.337	0.090618	0.90938	0.18124	0.6552	FALSE
GART_12	GART	186.55/113.37/40.8	122.65/18.909/38.044	113.37	38.044	-1.5505	5310.8	4630.3	1.3368	0.090648	0.90935	0.1813	0.6552	FALSE
CORO1A_2	CORO1A	112.8/382.49/550.8	216.2/69.963/217.8	382.49	216.2	-0.82012	50531	15622	1.3365	0.090694	0.90931	0.18139	0.6552	FALSE
ABCB4_7	ABCB4	129.43/319.4/338.82	168.39/171.13/42.8	319.4	168.39	-0.9195	18232	13045	1.3363	0.09072	0.90928	0.18144	0.6552	FALSE
SNX1_9	SNX1	87.49/5.9147/93.13	27.026/92.653/16.169	87.49	27.026	-1.6588	3343.2	3573.5	1.3362	0.090741	0.90926	0.18148	0.6552	FALSE
GPBP1L1_3	GPBP1L1	44.83/81.82/43.461	12.473/83.199/0	44.83	12.473	-1.7662	685.09	1831	1.3361	0.090756	0.90924	0.18151	0.6552	FALSE
MED8_13	MED8	156.18/239.55/565.88	165.27/111.56/108.43	239.55	111.56	-1.0956	56721	9784.1	1.3357	0.090831	0.90917	0.18166	0.6552	FALSE
ZNF22_5	ZNF22	60.014/315.45/313.98	149.68/164.51/347.15	313.98	164.51	-0.92838	32251	12824	1.3352	0.090902	0.9091	0.1818	0.65551	FALSE
SBK1_10	SBK1	540.13/485.01/564.99	341.98/237.31/664.82	540.13	341.98	-0.65785	1828.1	22061	1.3348	0.090965	0.90903	0.18193	0.65561	FALSE
PDHX_6	PDHX	144.61/119.28/94.904	30.144/156/40.898	119.28	40.898	-1.5215	617.95	4871.9	1.3348	0.090968	0.90903	0.18194	0.65561	FALSE
EEFSEC_12	EEFSEC	193.06/110.41/120.63	182.94/41.599/38.044	120.63	41.599	-1.5135	2675.4	4926.9	1.3336	0.091167	0.90883	0.18233	0.65665	FALSE
UBE2I_6	UBE2I	181.49/0/126.83	44.696/14.182/47.555	126.83	44.696	-1.4841	9537	5180.5	1.3319	0.091443	0.90856	0.18289	0.6577	FALSE
NLRP8_13	NLRP8	198.12/139.98/98.452	129.93/42.545/51.36	139.98	51.36	-1.429	2552.3	5717.5	1.3318	0.091459	0.90854	0.18292	0.6577	FALSE
RNF151_14	RNF151	246.56/465.29/362.76	201.65/130.47/224.46	362.76	201.65	-0.844	12007	14817	1.3315	0.091513	0.90849	0.18303	0.65773	FALSE
SPDYE2_13	SPDYE2	183.66/193.21/115.3	214.13/60.508/76.088	183.66	76.088	-1.2603	2381.8	7501.4	1.3304	0.091696	0.9083	0.18339	0.65861	FALSE
HTRA2_5	HTRA2	135.21/233.63/195.13	83.156/18.909/94.159	195.13	83.156	-1.2207	2536.3	7969.9	1.3299	0.091778	0.90822	0.18356	0.65861	FALSE
EFCAB5_8	EFCAB5	324.65/340.1/90.469	148.64/194.76/173.1	324.65	173.1	-0.90341	27541	13260	1.3292	0.091885	0.90811	0.18377	0.6591	FALSE
LSS_10	LSS	86.767/187.3/29.27	27.026/21.745/179.76	86.767	27.026	-1.6469	6706.4	3543.9	1.3287	0.091981	0.90802	0.18396	0.65937	FALSE
KLC2_13	KLC2	73.029/157.73/39.026	21.828/83.199/12.364	73.029	21.828	-1.6973	4164.9	2982.8	1.3285	0.092004	0.908	0.18401	0.65937	FALSE
COMMD3_5	COMMD3	533.62/716.67/295.36	333.66/658.97/337.64	533.62	337.64	-0.65875	45138	21795	1.3283	0.092041	0.90796	0.18408	0.65944	FALSE
EIF3F_7	EIF3F	120.03/100.55/128.61	16.631/41.599/284.38	120.03	41.599	-1.5064	226.5	4902.5	1.3281	0.09207	0.90793	0.18414	0.65946	FALSE
INTS1_4	INTS1	101.23/188.29/160.54	1.0394/120.07/62.773	160.54	62.773	-1.3409	2143.8	6557.1	1.3278	0.092125	0.90787	0.18425	0.65966	FALSE
TRA2B_1	TRA2B	96.89/112.38/121.51	185.02/17.963/38.044	112.38	38.044	-1.538	161.67	4590.1	1.3275	0.09217	0.90783	0.18434	0.65979	FALSE
KMT2D_9	KMT2D	163.41/417.97/142.8	64.446/333.74/57.066	163.41	64.446	-1.3289	32613	6674.4	1.3271	0.092234	0.90777	0.18447	0.66005	FALSE
BTF3_2	BTF3	155.46/69.005/119.74	198.53/41.599/9.5111	119.74	41.599	-1.503	1924.9	4890.6	1.3255	0.092511	0.90749	0.18502	0.66078	FALSE
BMP15_14	BMP15	365.15/389.39/298.9	219.32/204.22/103.67	365.15	204.22	-0.83528	2487.8	14914	1.3254	0.092525	0.90748	0.18505	0.66078	FALSE
ARGLU1_9	ARGLU1	141.72/349.95/197.79	85.235/61.454/344.3	197.79	85.235	-1.2049	13149	8078.6	1.3247	0.092637	0.90736	0.18527	0.66089	FALSE
CSNK1A1_9	CSNK1A1	372.38/279.96/82.487	63.406/140.87/184.51	279.96	140.87	-0.9858	23769	11435	1.3245	0.092663	0.90734	0.18533	0.66089	FALSE
TSPAN11_4	TSPAN11	344.18/150.83/240.36	311.83/0.94544/113.18	240.36	113.18	-1.0799	9397.1	9817.5	1.3242	0.092714	0.90729	0.18543	0.66089	FALSE
HYOU1_4	HYOU1	141/408.12/275.84	6.2367/138.03/163.59	275.84	138.03	-0.99362	17840	11267	1.3234	0.092846	0.90715	0.18569	0.66152	FALSE
TADA2A_10	TADA2A	101.95/0/89.582	48.854/28.363/25.68	89.582	28.363	-1.6252	4089	3658.9	1.3232	0.092882	0.90712	0.18576	0.66159	FALSE
INPP5J_6	INPP5J	454.81/289.82/360.1	197.49/327.12/200.68	360.1	200.68	-0.84032	6954	14708	1.3226	0.092983	0.90702	0.18597	0.66202	FALSE
PIP5K1A_11	PIP5K1A	380.33/331.22/174.73	178.78/115.34/208.29	331.22	178.78	-0.88589	13451	13529	1.3225	0.092999	0.907	0.186	0.66202	FALSE
FURIN_8	FURIN	152.57/355.87/284.71	88.353/277.96/144.57	284.71	144.57	-0.97287	11263	11629	1.3218	0.093114	0.90689	0.18623	0.66227	FALSE
TM9SF2_1	TM9SF2	0/139/115.3	46.775/39.709/34.24	115.3	39.709	-1.5145	6928.2	4709.5	1.3213	0.093196	0.9068	0.18639	0.66266	FALSE
ARPC5L_6	ARPC5L	72.306/49.289/106.43	21.828/287.41/8.56	72.306	21.828	-1.6831	847.26	2953.3	1.3203	0.093369	0.90663	0.18674	0.66352	FALSE
TBXAS1_13	TBXAS1	129.43/514.58/307.77	482.3/161.67/116.03	307.77	161.67	-0.92459	37288	12571	1.3193	0.093529	0.90647	0.18706	0.66367	FALSE
ANKHD1-EIF4EBP3_3	ANKHD1-EIF4EBP3	30.369/162.65/123.29	43.657/67.126/24.729	123.29	43.657	-1.4767	5091.8	5035.6	1.319	0.09359	0.90641	0.18718	0.66372	FALSE
GREB1L_8	GREB1L	230.66/419.95/351.23	194.38/386.69/167.39	351.23	194.38	-0.85028	9630.1	14346	1.3187	0.09364	0.90636	0.18728	0.66388	FALSE
SERPINA1_10	SERPINA1	65.075/252.36/104.66	27.026/34.981/81.795	104.66	34.981	-1.5541	11691	4274.8	1.3184	0.093684	0.90632	0.18737	0.66389	FALSE
MTA2_12	MTA2	206.8/52.247/321.96	91.471/67.126/306.26	206.8	91.471	-1.1681	18575	8446.4	1.3183	0.093695	0.90631	0.18739	0.66389	FALSE
STRAP_10	STRAP	185.1/36.474/66.522	148.64/19.854/0	66.522	19.854	-1.695	7482.3	2717	1.3175	0.093844	0.90616	0.18769	0.66389	FALSE
GATS_8	GATS	258.86/123.22/200.45	231.8/63.345/87.502	200.45	87.502	-1.1867	4687.6	8187.3	1.3174	0.093848	0.90615	0.1877	0.66389	FALSE
IREB2_3	IREB2	95.444/321.37/149.01	198.53/49.163/57.066	149.01	57.066	-1.3693	16288	6086.1	1.3173	0.093861	0.90614	0.18772	0.66389	FALSE
TRIAP1_3	TRIAP1	284.16/197.16/395.58	110.18/144.65/182.61	284.16	144.65	-0.96925	9992	11606	1.3172	0.093885	0.90612	0.18777	0.66389	FALSE
KMT2D_8	KMT2D	46.999/68.019/38.139	13.513/84.144/0	46.999	13.513	-1.7257	260.18	1919.6	1.3168	0.09396	0.90604	0.18792	0.66423	FALSE
NonTargeting_Human_0430	NonTargeting_Human_0430	69.414/0/39.913	11.434/0/209.24	39.913	11.434	-1.7183	1231.7	1630.2	1.3163	0.094033	0.90597	0.18807	0.66454	FALSE
MESDC2_4	MESDC2	186.55/135.05/191.58	185.02/53.89/78.942	186.55	78.942	-1.2303	1338.6	7619.5	1.3161	0.09407	0.90593	0.18814	0.66462	FALSE
RALGAPA1_14	RALGAPA1	91.106/151.81/131.27	47.815/180.58/38.044	131.27	47.815	-1.4381	1017.5	5361.6	1.3158	0.094127	0.90587	0.18825	0.66478	FALSE
TMEM67_9	TMEM67	217.64/339.11/57.652	98.747/143.71/94.159	217.64	98.747	-1.1322	20176	8889.4	1.3156	0.094148	0.90585	0.1883	0.66478	FALSE
B4GALT2_8	B4GALT2	273.32/320.38/432.83	171.51/148.43/199.73	320.38	171.51	-0.89762	7430.3	13086	1.315	0.094249	0.90575	0.1885	0.66511	FALSE
ELP3_11	ELP3	88.936/248.42/197.79	159.04/86.035/0	197.79	86.035	-1.1916	7206.2	8078.6	1.3148	0.094292	0.90571	0.18858	0.66512	FALSE
RALGAPB_7	RALGAPB	39.768/160.68/56.765	16.631/94.544/8.56	56.765	16.631	-1.7121	5544	2318.5	1.3147	0.094304	0.9057	0.18861	0.66512	FALSE
WRB_10	WRB	106.29/260.25/211.1	94.59/114.4/0	211.1	94.59	-1.1498	6700.1	8622	1.3143	0.094377	0.90562	0.18875	0.66541	FALSE
S100A14_7	S100A14	154.73/342.07/242.14	95.629/115.34/135.06	242.14	115.34	-1.0634	8812.7	9890	1.3141	0.094412	0.90559	0.18882	0.66541	FALSE
ELF4_14	ELF4	149.67/54.218/167.63	67.564/57.672/27.582	149.67	57.672	-1.3607	4717.1	6113.3	1.3136	0.094497	0.9055	0.18899	0.66541	FALSE
USO1_2	USO1	85.321/222.79/78.052	27.026/199.49/0	85.321	27.026	-1.623	9475	3484.9	1.3134	0.094524	0.90548	0.18905	0.66541	FALSE
RUVBL2_2	RUVBL2	63.629/194.2/128.61	1.0394/180.58/46.604	128.61	46.604	-1.445	4262.3	5252.9	1.3134	0.094531	0.90547	0.18906	0.66541	FALSE
MED20_8	MED20	57.845/333.2/102	0/34.036/211.15	102	34.036	-1.5557	27701	4166.1	1.3133	0.094549	0.90545	0.1891	0.66541	FALSE
UPP2_13	UPP2	505.42/416/149.01	197.49/270.4/245.39	416	245.39	-0.75914	39641	16991	1.3127	0.094642	0.90536	0.18928	0.66546	FALSE
DNLZ_1	DNLZ	147.5/211.94/184.49	77.958/147.49/76.088	184.49	77.958	-1.2321	1060.8	7535.2	1.3125	0.094681	0.90532	0.18936	0.66546	FALSE
NonTargeting_Human_0478	NonTargeting_Human_0478	342.01/565.84/470.97	168.39/289.31/441.31	470.97	289.31	-0.70113	12816	19237	1.3117	0.094817	0.90518	0.18963	0.66579	FALSE
LGR5_1	LGR5	352.85/159.7/583.62	196.46/334.69/124.59	352.85	196.46	-0.84163	45280	14412	1.3115	0.094837	0.90516	0.18967	0.66579	FALSE
WDR82_2	WDR82	0/47.318/7.0956	0/2.8363/10.462	7.0956	2.8363	-1.0774	834.09	289.82	1.311	0.094934	0.90507	0.18987	0.66609	FALSE
NonTargeting_Human_0927	NonTargeting_Human_0927	204.63/331.22/321.08	172.55/262.83/143.62	321.08	172.55	-0.89207	6831.9	13114	1.3104	0.095029	0.90497	0.19006	0.66657	FALSE
PIK3R4_15	PIK3R4	56.399/77.877/39.026	16.631/0/85.6	56.399	16.631	-1.7029	381.57	2303.6	1.31	0.095104	0.9049	0.19021	0.66662	FALSE
UBE2L3_5	UBE2L3	136.66/148.85/70.956	50.933/0/149.32	136.66	50.933	-1.4064	2232.7	5581.7	1.3099	0.095119	0.90488	0.19024	0.66662	FALSE
METAP1_3	METAP1	188.72/143.93/88.695	29.104/54.836/65.626	143.93	54.836	-1.376	2528.4	5878.5	1.309	0.095259	0.90474	0.19052	0.6672	FALSE
CTCF_9	CTCF	113.52/166.6/84.261	39.499/37.818/97.964	113.52	39.499	-1.4996	1836.7	4636.7	1.3087	0.095311	0.90469	0.19062	0.6672	FALSE
CERS6_15	CERS6	179.32/238.56/190.7	82.116/159.78/22.827	190.7	82.116	-1.2056	1210.3	7788.8	1.3082	0.095401	0.9046	0.1908	0.66722	FALSE
UBE2L3_7	UBE2L3	0/59.147/42.574	0/19.854/12.364	42.574	12.364	-1.7051	1043.6	1738.9	1.3081	0.095418	0.90458	0.19084	0.66722	FALSE
IRS2_2	IRS2	236.44/82.806/222.63	91.471/121.96/102.72	222.63	102.72	-1.1084	9870.2	9093	1.3079	0.095449	0.90455	0.1909	0.66722	FALSE
SRP19_5	SRP19	259.58/142.94/256.33	125.77/123.85/298.65	256.33	125.77	-1.0214	6434	10470	1.3079	0.09545	0.90455	0.1909	0.66722	FALSE
SPNS1_4	SPNS1	229.93/82.806/147.23	231.8/56.727/33.289	147.23	56.727	-1.3606	5495.1	6013.7	1.3075	0.095525	0.90447	0.19105	0.66756	FALSE
STT3A_5	STT3A	221.26/289.82/162.31	101.87/150.33/73.235	221.26	101.87	-1.1115	4087.8	9037.1	1.3073	0.095557	0.90444	0.19111	0.66759	FALSE
DNLZ_11	DNLZ	335.5/202.09/31.043	89.392/134.25/58.969	202.09	89.392	-1.1678	23527	8254.1	1.3071	0.095597	0.9044	0.19119	0.66768	FALSE
STAG2_4	STAG2	270.42/284.89/241.25	195.42/50.108/136.01	270.42	136.01	-0.98629	530.19	11045	1.3053	0.095896	0.9041	0.19179	0.66855	FALSE
C11orf57_10	C11orf57	125.81/8.8721/165.86	99.787/0.94544/45.653	125.81	45.653	-1.4427	7639.5	5138.7	1.3052	0.095914	0.90409	0.19183	0.66855	FALSE
ZNF232_8	ZNF232	208.24/286.86/100.23	93.55/16.073/127.45	208.24	93.55	-1.146	8924.5	8505.5	1.3047	0.095999	0.904	0.192	0.66887	FALSE
NonTargeting_Human_0885	NonTargeting_Human_0885	36.153/134.07/219.08	49.893/15.127/60.871	134.07	49.893	-1.4081	8407	5475.9	1.3046	0.096014	0.90399	0.19203	0.66887	FALSE
ZBTB17_10	ZBTB17	358.64/138.01/70.069	51.972/129.53/0	138.01	51.972	-1.3919	26646	5636.9	1.3043	0.096061	0.90394	0.19212	0.669	FALSE
FRY_5	FRY	135.94/246.45/212.87	96.669/391.41/36.142	212.87	96.669	-1.1308	3523.1	8694.5	1.3035	0.096208	0.90379	0.19242	0.66941	FALSE
NonTargeting_Human_0329	NonTargeting_Human_0329	329.72/319.4/471.86	179.82/108.73/242.53	329.72	179.82	-0.871	10156	13467	1.3035	0.09621	0.90379	0.19242	0.66941	FALSE
DNAJC13_7	DNAJC13	323.21/121.25/298.9	74.84/156.94/205.44	298.9	156.94	-0.92509	16075	12209	1.3027	0.096347	0.90365	0.19269	0.67004	FALSE
TMEM134_6	TMEM134	281.99/248.42/122.4	160.07/82.253/120.79	248.42	120.79	-1.0342	8504	10146	1.3023	0.096402	0.9036	0.1928	0.67023	FALSE
NonTargeting_Human_0675	NonTargeting_Human_0675	344.18/139.98/383.16	172.55/190.98/233.97	344.18	190.98	-0.84638	21608	14058	1.3018	0.096491	0.90351	0.19298	0.67039	FALSE
DNAJC4_4	DNAJC4	207.52/75.906/68.296	144.48/0.94544/23.778	75.906	23.778	-1.6341	8689.9	3100.3	1.3016	0.096521	0.90348	0.19304	0.67039	FALSE
EWSR1_10	EWSR1	269.7/149.84/221.74	84.195/253.38/102.72	221.74	102.72	-1.1027	3735	9056.8	1.3012	0.096587	0.90341	0.19317	0.67039	FALSE
CSNK1A1_1	CSNK1A1	269.7/175.47/209.32	39.499/94.544/119.84	209.32	94.544	-1.1384	2395.8	8549.6	1.3012	0.096591	0.90341	0.19318	0.67039	FALSE
METAP1D_3	METAP1D	256.69/174.48/88.695	72.761/61.454/97.964	174.48	72.761	-1.2504	7058.5	7126.7	1.3011	0.096606	0.90339	0.19321	0.67039	FALSE
TAF1B_14	TAF1B	60.014/47.318/219.96	222.44/0/18.071	60.014	18.071	-1.6778	12873	2451.2	1.3011	0.096618	0.90338	0.19324	0.67039	FALSE
FAM104A_8	FAM104A	321.04/215.89/445.25	173.59/81.308/310.06	321.04	173.59	-0.88328	13243	13113	1.3009	0.096648	0.90335	0.1933	0.67041	FALSE
SBK1_13	SBK1	292.84/110.41/413.32	152.8/183.42/27.582	292.84	152.8	-0.93399	23898	11961	1.2998	0.096839	0.90316	0.19368	0.67151	FALSE
PHF3_1	PHF3	208.24/73.934/98.452	165.27/33.09/25.68	98.452	33.09	-1.5446	6327.4	4021.2	1.2994	0.09691	0.90309	0.19382	0.67151	FALSE
HTRA2_3	HTRA2	266.81/407.13/97.565	134.09/170.18/76.088	266.81	134.09	-0.9873	24167	10898	1.2987	0.097015	0.90298	0.19403	0.67151	FALSE
ZG16B_3	ZG16B	192.33/373.61/331.72	181.9/86.035/223.51	331.72	181.9	-0.86323	10592	13549	1.2985	0.097055	0.90294	0.19411	0.67151	FALSE
ZFR_2	ZFR	0/115.34/72.73	58.209/22.691/17.12	72.73	22.691	-1.6379	3552.5	2970.6	1.2983	0.097087	0.90291	0.19417	0.67151	FALSE
MED8_10	MED8	73.029/0/28.383	78.998/8.509/0	28.383	8.509	-1.6276	1399.4	1159.3	1.2983	0.0971	0.9029	0.1942	0.67151	FALSE
SRP9_3	SRP9	212.58/163.64/152.56	40.538/95.49/66.577	163.64	66.577	-1.2847	1259	6683.8	1.2982	0.097101	0.9029	0.1942	0.67151	FALSE
NonTargeting_Human_0059	NonTargeting_Human_0059	309.47/337.14/135.7	165.27/137.09/171.2	309.47	165.27	-0.90091	15480	12640	1.298	0.097151	0.90285	0.1943	0.67151	FALSE
TAF8_1	TAF8	101.95/187.3/118.85	42.617/113.45/6.6577	118.85	42.617	-1.4583	2485.4	4854.4	1.2977	0.0972	0.9028	0.1944	0.67151	FALSE
IRS1_13	IRS1	140.27/172.51/281.16	97.708/71.854/64.675	172.51	71.854	-1.252	6422.3	7046.2	1.2974	0.097239	0.90276	0.19448	0.67151	FALSE
RNPEP_14	RNPEP	156.18/260.25/95.791	62.367/494.47/43.751	156.18	62.367	-1.3106	7238.4	6379.1	1.2973	0.097271	0.90273	0.19454	0.67151	FALSE
CAPZB_3	CAPZB	63.629/2.9574/62.087	1.0394/18.909/43.751	62.087	18.909	-1.6639	1749.3	2535.9	1.2965	0.097399	0.9026	0.1948	0.67199	FALSE
PIM2_15	PIM2	325.38/73.934/234.16	54.051/111.56/191.17	234.16	111.56	-1.0629	16996	9563.9	1.296	0.097485	0.90252	0.19497	0.67203	FALSE
PIGQ_6	PIGQ	357.19/284.89/337.04	120.58/186.25/284.38	337.04	186.25	-0.85222	1562.8	13766	1.2958	0.097527	0.90247	0.19505	0.67203	FALSE
GIGYF2_13	GIGYF2	13.738/245.46/130.38	134.09/40.654/48.506	130.38	48.506	-1.4081	13424	5325.4	1.2956	0.097551	0.90245	0.1951	0.67203	FALSE
NonTargeting_Human_0641	NonTargeting_Human_0641	99.782/205.04/227.95	71.722/134.25/92.257	205.04	92.257	-1.1437	5802.3	8374.9	1.2954	0.097586	0.90241	0.19517	0.67203	FALSE
CCDC53_10	CCDC53	128.7/284.89/210.21	95.629/253.38/33.289	210.21	95.629	-1.1281	6110.3	8585.8	1.2953	0.097616	0.90238	0.19523	0.67203	FALSE
PROX1_8	PROX1	355.75/253.35/290.03	191.26/34.981/151.23	290.03	151.23	-0.93498	2832	11846	1.2952	0.097619	0.90238	0.19524	0.67203	FALSE
VPS13C_1	VPS13C	171.37/196.17/109.1	69.643/85.09/71.333	171.37	71.333	-1.2527	2246.5	6999.3	1.2952	0.097625	0.90238	0.19525	0.67203	FALSE
HYPK_10	HYPK	39.768/135.05/132.16	33.262/190.98/49.458	132.16	49.458	-1.4	4272	5397.8	1.295	0.097656	0.90234	0.19531	0.67206	FALSE
NOTCH2NL_4	NOTCH2NL	360.08/669.35/714.89	455.28/289.31/730.45	669.35	455.28	-0.555	48859	27339	1.2948	0.097689	0.90231	0.19538	0.67209	FALSE
ARGLU1_8	ARGLU1	117.14/55.204/20.4	16.631/139.93/9.5111	55.204	16.631	-1.6725	2523.4	2254.8	1.2943	0.097778	0.90222	0.19556	0.6724	FALSE
CARS_9	CARS	87.49/292.78/126.83	46.775/0/103.67	126.83	46.775	-1.4199	14543	5180.5	1.2942	0.097799	0.9022	0.1956	0.6724	FALSE
CABIN1_2	CABIN1	198.12/42.389/260.76	74.84/87.926/122.69	198.12	87.926	-1.1629	14088	8092	1.294	0.097828	0.90217	0.19566	0.6724	FALSE
IREB2_8	IREB2	133.04/212.93/195.13	108.1/86.035/64.675	195.13	86.035	-1.1721	2085.8	7969.9	1.2939	0.097844	0.90216	0.19569	0.6724	FALSE
FURIN_3	FURIN	182.93/96.607/212.87	71.722/78.472/182.61	182.93	78.472	-1.2107	4174.2	7471.8	1.2933	0.097949	0.90205	0.1959	0.67278	FALSE
TFAM_3	TFAM	310.19/81.82/116.19	4.1578/41.599/110.33	116.19	41.599	-1.46	19409	4745.7	1.2924	0.098115	0.90189	0.19623	0.67331	FALSE
NAA60_12	NAA60	79.537/77.877/124.17	63.406/25.527/0	79.537	25.527	-1.6022	997.61	3248.6	1.2917	0.098229	0.90177	0.19646	0.67352	FALSE
MOCS3_3	MOCS3	376.71/120.27/251.01	98.747/271.34/123.64	251.01	123.64	-1.0157	16448	10252	1.2914	0.098278	0.90172	0.19656	0.67352	FALSE
CPSF4_8	CPSF4	95.444/142.94/92.243	135.13/32.145/0	95.444	32.145	-1.5409	1133	3898.3	1.2909	0.098376	0.90162	0.19675	0.67359	FALSE
KLHL20_2	KLHL20	247.29/220.82/235.93	113.3/242.98/112.23	235.93	113.3	-1.0516	178.7	9636.4	1.2903	0.098469	0.90153	0.19694	0.67404	FALSE
IRS4_13	IRS4	292.84/449.52/233.27	153.84/108.73/214.95	292.84	153.84	-0.92427	14049	11961	1.29	0.098526	0.90147	0.19705	0.67405	FALSE
ACTR3_11	ACTR3	181.49/79.849/109.98	5.1972/38.763/83.697	109.98	38.763	-1.4808	3010.6	4492.1	1.2899	0.098545	0.90146	0.19709	0.67405	FALSE
SEC61B_7	SEC61B	171.37/195.19/83.374	71.722/231.63/57.066	171.37	71.722	-1.245	4155	6999.3	1.2898	0.098554	0.90145	0.19711	0.67405	FALSE
IRS1_8	IRS1	300.79/204.06/719.32	352.37/125.74/159.79	300.79	159.79	-0.90842	92261	12286	1.2892	0.09866	0.90134	0.19732	0.6744	FALSE
TMEM253_2	TMEM253	113.52/197.16/95.791	40.538/0.94544/100.82	113.52	40.538	-1.4631	3654.7	4636.7	1.2879	0.098883	0.90112	0.19777	0.67498	FALSE
CHP1_8	CHP1	240.06/428.82/164.09	116.42/266.61/83.697	240.06	116.42	-1.0377	20701	9804.9	1.2873	0.098993	0.90101	0.19799	0.67538	FALSE
CARM1_10	CARM1	0/125.2/158.76	86.274/46.327/0	125.2	46.327	-1.4149	8400.4	5113.5	1.2873	0.098997	0.901	0.19799	0.67538	FALSE
STRAP_1	STRAP	65.075/154.77/119.74	43.657/69.963/21.875	119.74	43.657	-1.4349	2107.6	4890.6	1.2862	0.099191	0.90081	0.19838	0.67652	FALSE
HMOX2_13	HMOX2	311.64/210.96/345.91	202.69/156.94/168.35	311.64	168.35	-0.88453	5655.6	12729	1.2847	0.099441	0.90056	0.19888	0.67766	FALSE
TOMM22_7	TOMM22	92.552/181.38/46.122	1.0394/31.2/63.724	92.552	31.2	-1.5387	5023.5	3780.2	1.2836	0.099639	0.90036	0.19928	0.67817	FALSE
NonTargeting_Human_0018	NonTargeting_Human_0018	305.85/448.53/503.79	140.33/275.12/301.5	448.53	275.12	-0.70311	11705	18320	1.2835	0.099651	0.90035	0.1993	0.67817	FALSE
WBSCR16_13	WBSCR16	331.16/84.778/204.89	242.19/63.345/93.208	204.89	93.208	-1.1279	15186	8368.4	1.2828	0.099778	0.90022	0.19956	0.67817	FALSE
NMT1_15	NMT1	114.24/213.92/137.48	53.012/0.94544/77.991	137.48	53.012	-1.3583	3191.3	5615.2	1.2823	0.099873	0.90013	0.19975	0.67817	FALSE
NonTargeting_Human_0871	NonTargeting_Human_0871	624.72/610.2/697.15	419.94/703.41/350.01	624.72	419.94	-0.57193	2727.9	25516	1.2823	0.099876	0.90012	0.19975	0.67817	FALSE
RALGAPB_2	RALGAPB	119.31/282.92/61.2	43.657/27.418/71.333	119.31	43.657	-1.4297	15073	4872.9	1.2821	0.099902	0.9001	0.1998	0.67817	FALSE
TSPYL4_1	TSPYL4	164.86/276.02/326.4	142.4/128.58/277.72	276.02	142.4	-0.94991	7447.6	11274	1.282	0.099921	0.90008	0.19984	0.67817	FALSE
NonTargeting_Human_0538	NonTargeting_Human_0538	31.092/53.233/23.061	117.46/0/9.5111	31.092	9.5111	-1.6103	277.36	1269.9	1.2811	0.10009	0.89991	0.20017	0.67829	FALSE
AGPAT6_15	AGPAT6	82.429/208.99/312.21	121.62/3.7818/96.062	208.99	96.062	-1.1133	13336	8535.9	1.2807	0.10014	0.89986	0.20028	0.67845	FALSE
GAPDH_3	GAPDH	65.075/115.34/90.469	76.919/0.94544/30.435	90.469	30.435	-1.5409	631.63	3695.2	1.2805	0.10018	0.89982	0.20036	0.67854	FALSE
CNOT2_15	CNOT2	42.661/111.39/158.76	47.815/21.745/39.946	111.39	39.946	-1.4568	3484.1	4549.8	1.2794	0.10037	0.89963	0.20075	0.67898	FALSE
CREB5_3	CREB5	275.49/420.93/466.54	253.62/143.71/306.26	420.93	253.62	-0.72863	11617	17193	1.2794	0.10039	0.89961	0.20077	0.67898	FALSE
NRBP1_3	NRBP1	188.72/136.04/262.54	83.156/59.563/157.88	188.72	83.156	-1.1727	4112.3	7708.1	1.2793	0.1004	0.8996	0.2008	0.67898	FALSE
WDR55_2	WDR55	241.5/122.24/368.09	90.432/118.18/183.56	241.5	118.18	-1.0249	15124	9864	1.2792	0.10041	0.89959	0.20083	0.67898	FALSE
POLRMT_12	POLRMT	140.27/94.636/50.556	28.065/39.709/32.338	94.636	32.338	-1.5204	2012.9	3865.3	1.278	0.10062	0.89938	0.20124	0.67924	FALSE
FAM134C_3	FAM134C	315.25/97.593/278.5	110.18/144.65/210.19	278.5	144.65	-0.94034	17040	11375	1.2777	0.10068	0.89932	0.20137	0.67924	FALSE
NonTargeting_Human_0543	NonTargeting_Human_0543	356.47/698.92/348.57	225.56/203.27/147.42	356.47	203.27	-0.80734	58669	14560	1.2776	0.1007	0.8993	0.2014	0.67924	FALSE
C16orf62_11	C16orf62	366.59/319.4/310.43	68.603/245.82/175	319.4	175	-0.86425	1153.9	13045	1.2772	0.10076	0.89924	0.20151	0.67924	FALSE
NonTargeting_Human_0353	NonTargeting_Human_0353	69.414/112.38/246.57	40.538/22.691/58.969	112.38	40.538	-1.4486	9927	4590.1	1.277	0.1008	0.8992	0.20159	0.67924	FALSE
STAM2_7	STAM2	108.46/103.51/30.156	36.381/24.582/56.115	103.51	36.381	-1.4832	2702.5	4227.7	1.2767	0.10086	0.89914	0.20172	0.67924	FALSE
FNTB_4	FNTB	308.75/130.12/143.69	33.262/56.727/111.28	143.69	56.727	-1.3256	13714	5868.8	1.2766	0.10087	0.89913	0.20173	0.67924	FALSE
POLRMT_14	POLRMT	211.13/159.7/209.32	96.669/0.94544/177.86	209.32	96.669	-1.1066	1232.9	8549.6	1.2762	0.10094	0.89906	0.20189	0.67924	FALSE
HIST2H2AA3_15	HIST2H2AA3	234.99/201.1/151.67	163.19/76.581/91.306	201.1	91.306	-1.1306	1796.1	8213.8	1.2762	0.10095	0.89905	0.2019	0.67924	FALSE
SRP9_6	SRP9	93.998/0/114.42	145.52/32.145/25.68	93.998	32.145	-1.5191	4626.3	3839.3	1.276	0.10098	0.89902	0.20196	0.67924	FALSE
HIST2H2BF_13	HIST2H2BF	54.23/139.98/114.42	41.578/30.254/77.991	114.42	41.578	-1.4387	2138.1	4673.3	1.276	0.10099	0.89901	0.20197	0.67924	FALSE
HSD17B10_12	HSD17B10	239.33/137.02/243.91	256.74/53.89/116.99	239.33	116.99	-1.0264	5244	9775.4	1.2759	0.101	0.899	0.20199	0.67924	FALSE
RAB28_14	RAB28	55.676/283.91/176.5	75.88/46.327/169.3	176.5	75.88	-1.2072	13067	7209.2	1.2755	0.10107	0.89893	0.20214	0.67924	FALSE
MFAP1_14	MFAP1	70.86/24.645/65.635	20.789/99.271/0	65.635	20.789	-1.6127	853.74	2680.8	1.2753	0.1011	0.8989	0.20221	0.67924	FALSE
WRB_5	WRB	152.57/93.65/237.7	111.22/59.563/61.822	152.57	61.822	-1.2895	5359.8	6231.4	1.2746	0.10123	0.89877	0.20245	0.67924	FALSE
INTS1_5	INTS1	127.98/86.749/8.8695	29.104/1.8909/69.431	86.749	29.104	-1.5434	3882.7	3543.2	1.2745	0.10125	0.89875	0.2025	0.67924	FALSE
ERP44_13	ERP44	342.73/194.2/447.91	375.24/137.09/193.07	342.73	193.07	-0.82467	16562	13999	1.2744	0.10126	0.89874	0.20252	0.67924	FALSE
AGPAT1_5	AGPAT1	86.767/198.14/110.87	75.88/23.636/39.946	110.87	39.946	-1.45	4098.8	4528.4	1.2744	0.10127	0.89873	0.20254	0.67924	FALSE
LAMTOR4_9	LAMTOR4	78.091/75.906/47.009	93.55/20.8/24.729	75.906	24.729	-1.5797	419.91	3100.3	1.2738	0.10137	0.89863	0.20274	0.67924	FALSE
TBX1_9	TBX1	215.47/341.08/353.89	509.33/191.92/118.89	341.08	191.92	-0.82631	7971.1	13931	1.2734	0.10143	0.89857	0.20287	0.67924	FALSE
TADA2A_9	TADA2A	54.953/175.47/167.63	70.682/190.03/70.382	167.63	70.682	-1.2342	6379.3	6846.9	1.2734	0.10144	0.89856	0.20289	0.67924	FALSE
INSR_8	INSR	151.12/233.63/285.6	158/113.45/99.866	233.63	113.45	-1.0356	4754.4	9542.5	1.2715	0.10177	0.89823	0.20354	0.68013	FALSE
DARS_10	DARS	231.38/70.977/127.72	0/115.34/48.506	127.72	48.506	-1.3786	6982.5	5216.7	1.2714	0.10179	0.89821	0.20358	0.68013	FALSE
OR52B2_11	OR52B2	84.598/95.621/91.356	91.471/31.2/0	91.356	31.2	-1.5202	31.932	3731.4	1.2711	0.10184	0.89816	0.20368	0.68013	FALSE
NonTargeting_Human_0216	NonTargeting_Human_0216	180.04/57.176/114.42	208.93/24.582/41.849	114.42	41.849	-1.4295	3791.6	4673.3	1.2706	0.10193	0.89807	0.20386	0.68017	FALSE
CCDC169-SOHLH2_4	CCDC169-SOHLH2	244.39/629.92/497.58	279.61/316.72/369.98	497.58	316.72	-0.65006	40808	20323	1.2699	0.10207	0.89793	0.20413	0.68046	FALSE
MTHFD1_12	MTHFD1	36.153/178.43/173.84	88.353/74.69/65.626	173.84	74.69	-1.2079	9489.8	7100.5	1.2697	0.1021	0.8979	0.20421	0.68046	FALSE
PIGS_5	PIGS	87.49/146.88/224.4	177.75/15.127/58.969	146.88	58.969	-1.3022	4768.2	5999.3	1.2692	0.10218	0.89782	0.20437	0.68076	FALSE
MLLT11_14	MLLT11	316.7/502.75/140.14	207.89/173.96/142.67	316.7	173.96	-0.86063	32895	12935	1.2684	0.10233	0.89767	0.20466	0.68076	FALSE
RNF112_13	RNF112	388.28/287.85/394.69	293.12/28.363/229.22	388.28	229.22	-0.75783	5064	15859	1.2682	0.10236	0.89764	0.20471	0.68076	FALSE
SAP130_8	SAP130	311.64/117.31/455.89	200.61/170.18/155.98	311.64	170.18	-0.86899	29287	12729	1.2681	0.10237	0.89763	0.20475	0.68076	FALSE
GATS_5	GATS	69.414/160.68/156.1	222.44/64.29/58.969	156.1	64.29	-1.2668	3768.1	6376	1.268	0.1024	0.8976	0.20481	0.68076	FALSE
LRRC8A_7	LRRC8A	302.24/277.01/150.78	163.19/65.236/144.57	277.01	144.57	-0.93342	8284.6	11314	1.2679	0.10242	0.89758	0.20483	0.68076	FALSE
SORT1_5	SORT1	138.1/60.133/59.426	192.3/1.8909/19.022	60.133	19.022	-1.6104	3040	2456.1	1.2678	0.10243	0.89757	0.20486	0.68076	FALSE
TRIM4_2	TRIM4	302.24/326.3/250.12	163.19/121.02/349.06	302.24	163.19	-0.88506	1647.5	12345	1.2677	0.10246	0.89754	0.20491	0.68076	FALSE
TMEM165_11	TMEM165	185.1/142.94/332.61	40.538/215.56/81.795	185.1	81.795	-1.1685	11768	7560.4	1.2676	0.10246	0.89754	0.20492	0.68076	FALSE
SMARCB1_8	SMARCB1	31.815/112.38/86.922	37.42/10.4/29.484	86.922	29.484	-1.5282	1842.4	3550.2	1.2666	0.10264	0.89736	0.20529	0.68159	FALSE
GOLGA6A_14	GOLGA6A	125.09/213.92/164.97	69.643/55.781/216.85	164.97	69.643	-1.2323	1993	6738.2	1.2657	0.10281	0.89719	0.20562	0.68231	FALSE
TRIM4_7	TRIM4	206.8/223.77/124.17	111.22/43.49/96.062	206.8	96.062	-1.0982	3557.3	8446.4	1.2637	0.10316	0.89684	0.20633	0.6834	FALSE
NonTargeting_Human_0471	NonTargeting_Human_0471	158.35/668.36/542.82	302.48/419.78/354.76	542.82	354.76	-0.6122	81788	22171	1.2636	0.10318	0.89682	0.20636	0.6834	FALSE
PPAT_1	PPAT	183.66/198.14/263.43	90.432/193.82/34.24	198.14	90.432	-1.123	2235.8	8093	1.2635	0.1032	0.8968	0.20641	0.6834	FALSE
NonTargeting_Human_0454	NonTargeting_Human_0454	319.59/477.12/149.01	176.71/124.8/320.52	319.59	176.71	-0.85125	26957	13054	1.2634	0.10322	0.89678	0.20645	0.6834	FALSE
PFN1_9	PFN1	384.67/337.14/232.38	190.22/530.39/33.289	337.14	190.22	-0.82239	6616.5	13770	1.2621	0.10346	0.89654	0.20692	0.68439	FALSE
TAF1_11	TAF1	132.32/103.51/34.591	61.327/28.363/37.093	103.51	37.093	-1.456	2789.8	4227.7	1.2613	0.10359	0.89641	0.20718	0.68487	FALSE
ZNRF3_14	ZNRF3	182.93/285.88/345.03	151.76/140.87/202.59	285.88	151.76	-0.90918	7047.9	11676	1.2612	0.10361	0.89639	0.20723	0.68487	FALSE
RNF151_13	RNF151	563.26/491.91/651.02	372.12/299.71/795.12	563.26	372.12	-0.59672	6396.8	23006	1.2607	0.10371	0.89629	0.20742	0.68494	FALSE
RAB10_13	RAB10	90.383/105.48/96.678	1.0394/34.036/237.78	96.678	34.036	-1.4792	58.547	3948.7	1.2597	0.10389	0.89611	0.20778	0.68576	FALSE
NonTargeting_Human_0656	NonTargeting_Human_0656	145.34/272.08/270.52	54.051/168.29/140.76	270.52	140.76	-0.93758	7837	11049	1.259	0.10401	0.89599	0.20802	0.68586	FALSE
WDR61_13	WDR61	134.49/335.17/265.2	122.65/186.25/136.96	265.2	136.96	-0.94827	10990	10832	1.2586	0.10409	0.89591	0.20818	0.68586	FALSE
ARPC4_14	ARPC4	319.59/149.84/61.2	61.327/145.6/44.702	149.84	61.327	-1.2751	18337	6120.1	1.2585	0.1041	0.8959	0.2082	0.68586	FALSE
TAF2_1	TAF2	101.23/0/25.722	8.3156/62.399/4.7555	25.722	8.3156	-1.5203	3181.4	1050.6	1.2582	0.10417	0.89583	0.20834	0.68586	FALSE
HSD17B10_5	HSD17B10	226.32/193.21/232.38	96.669/109.67/186.42	226.32	109.67	-1.0384	566.31	9243.8	1.258	0.1042	0.8958	0.2084	0.68586	FALSE
ICA1L_3	ICA1L	93.275/251.38/156.99	65.485/23.636/240.63	156.99	65.485	-1.2487	6484.1	6412.2	1.2579	0.10421	0.89579	0.20842	0.68586	FALSE
SP140_1	SP140	673.17/313.48/658.12	452.16/366.83/483.16	658.12	452.16	-0.54052	59502	26880	1.2564	0.10449	0.89551	0.20898	0.68689	FALSE
MCCC2_14	MCCC2	36.153/105.48/0	0/41.599/11.413	36.153	11.413	-1.5816	3056.6	1476.6	1.2558	0.10459	0.89541	0.20917	0.68689	FALSE
MGEA5_12	MGEA5	161.97/179.41/62.087	68.603/70.908/18.071	161.97	68.603	-1.2273	5140.1	6615.4	1.2551	0.10472	0.89528	0.20944	0.68727	FALSE
NMT1_6	NMT1	83.152/146.88/219.08	95.629/54.836/59.92	146.88	59.92	-1.2795	4636.9	5999.3	1.2544	0.10485	0.89515	0.2097	0.68755	FALSE
TP53TG3_10	TP53TG3	159.07/139.98/125.06	16.631/97.381/56.115	139.98	56.115	-1.3036	293.56	5717.5	1.2536	0.10499	0.89501	0.20997	0.68755	FALSE
METTL14_1	METTL14	44.83/110.41/33.704	100.83/14.182/0	44.83	14.182	-1.594	2212.2	1831	1.2536	0.105	0.895	0.21	0.68755	FALSE
JAK1_3	JAK1	291.39/190.26/258.1	161.11/132.36/122.69	258.1	132.36	-0.95818	2855.7	10542	1.2535	0.10501	0.89499	0.21001	0.68755	FALSE
CCDC169-SOHLH2_14	CCDC169-SOHLH2	20.969/62.105/32.817	151.76/1.8909/10.462	32.817	10.462	-1.5609	499.07	1340.4	1.2527	0.10516	0.89484	0.21032	0.68834	FALSE
PLA2G10_3	PLA2G10	205.35/342.07/150.78	64.446/231.63/96.062	205.35	96.062	-1.0881	10835	8387.3	1.2524	0.10521	0.89479	0.21042	0.68834	FALSE
PPIL2_2	PPIL2	97.613/0/61.2	141.36/19.854/0	61.2	19.854	-1.5766	2535.7	2499.7	1.2519	0.1053	0.8947	0.2106	0.68839	FALSE
GFER_8	GFER	18.8/0.98579/0	48.854/0/0	0.98579	0	-0.98971	159.15	40.264	1.2515	0.10538	0.89462	0.21075	0.68839	FALSE
MARS2_5	MARS2	0/0.98579/63.861	0/0/59.92	0.98579	0	-0.98971	1977.1	40.264	1.2515	0.10538	0.89462	0.21075	0.68839	FALSE
CDC23_4	CDC23	0/0.98579/43.461	0/0/0	0.98579	0	-0.98971	902.55	40.264	1.2515	0.10538	0.89462	0.21075	0.68839	FALSE
NCBP1_15	NCBP1	35.43/171.53/124.17	47.815/57.672/35.191	124.17	47.815	-1.3585	5058.9	5071.8	1.2509	0.10548	0.89452	0.21097	0.68839	FALSE
ST6GAL1_12	ST6GAL1	435.28/273.06/223.51	143.44/319.56/108.43	273.06	143.44	-0.924	14385	11153	1.2508	0.1055	0.8945	0.21099	0.68839	FALSE
PITPNM2_5	PITPNM2	124.37/56.19/116.19	1.0394/73.745/43.751	116.19	43.751	-1.3889	1833.5	4745.7	1.2508	0.1055	0.8945	0.21101	0.68839	FALSE
DAP3_13	DAP3	50.614/202.09/34.591	0/82.253/16.169	50.614	16.169	-1.588	11600	2067.3	1.2505	0.10556	0.89444	0.21111	0.68839	FALSE
GIGYF2_2	GIGYF2	285.61/339.11/219.96	152.8/81.308/183.56	285.61	152.8	-0.89804	3585.8	11665	1.2494	0.10576	0.89424	0.21151	0.68917	FALSE
C10orf53_3	C10orf53	191.61/89.707/107.32	39.499/135.2/0	107.32	39.499	-1.4194	3707.5	4383.5	1.2488	0.10587	0.89413	0.21175	0.68972	FALSE
GATS_11	GATS	198.84/177.44/77.165	63.406/78.472/255.85	177.44	78.472	-1.1669	5256.7	7247.5	1.2486	0.10591	0.89409	0.21181	0.68975	FALSE
UBE2Q1_11	UBE2Q1	680.4/333.2/538.38	353.41/623.05/287.23	538.38	353.41	-0.60588	31135	21990	1.248	0.10601	0.89399	0.21201	0.68985	FALSE
[truncated: 10,581 more rows]
