# Supplementary material for: Genome-scale CRISPR screening for modifiers of cellular LDL uptake
Source: bioRxiv preprint, doi:10.1101/2020.07.01.182246, version 1 (2020-07-01)
Supplement: Supplemental Table 6 [file 182246_file19.xlsx]

## Sheet: annotation
Orthogonal screen of LDL uptake in LDLR KO HuH7 clonal line cultured under lipoprotein-rich or lipoprotein-depleted conditions
Output files from MAGeCK analysis
control = LDLlow sorted cells
treatment = LDLhigh sorted cells
Gene-level analysis
id	gene ID
num	number of individual gRNAs detected for a given gene
neg|score	MAGeCK significance score for depletion in LDLhigh cells (low score indicates gene disruption reduces LDL uptake)
neg|p-value	p-value for depletion in LDLhigh cells (gene disruption reduces LDL uptake)
neg|fdr	FDR for depletion in LDLhigh cells (gene disruption reduces LDL uptake)
neg|rank	gene rank for depletion in LDLhigh cells (gene disruption reduces LDL uptake)
neg|goodsgrna	number of gene-targeting gRNA with significant depletion in LDLhigh cells (gene disruption reduces LDL uptake)
neg|lfc	composite log2 fold change of gene-targeting gRNA (negative value indicates gene disruption reduces LDL uptake)
pos|score	MAGeCK significance score for enrichment in LDLhigh cells (low score indicates gene disruption increases LDL uptake)
pos|p-value	p-value for enrichment in LDLhigh cells (gene disruption increases LDL uptake)
pos|fdr	FDR for enrichment in LDLhigh cells (gene disruption increases LDL uptake)
pos|rank	gene rank for enrichment in LDLhigh cells (gene disruption increases LDL uptake)
pos|goodsgrna	number of gene-targeting gRNA with significant enrichment in LDLhigh cells (gene disruption increases LDL uptake)
pos|lfc	composite log2 fold change of gene-targeting gRNA (positive value indicates gene disruption increases LDL uptake)
gRNA-level analysis
sgrna	GeCKO library gRNA identifier
gene	targeted gene
control_count	individual replicate normalized read counts in LDLlow cells
treatment_count	individual replicate normalized read counts in LDLhigh cells
control_mean	mean normalized read counts in LDLlow cells
treat_mean	mean normalized read counts in LDLhigh cells
LFC	log2 fold change of normalized read counts in LDLhigh relative to LDLlow cells
control_var	raw variance in LDLlow cells
adj_var	adjusted variance in LDLlow cells
score	MAGeCK significance score for individual gRNA
p.low	p-value for depletion in LDLhigh cells (gene disruption reduces LDL uptake)
p.high	p-value for enrichment in LDLhigh cells (gene disruption increases LDL uptake)
p.twosided	minimum p-value for either enrichment or depletion
FDR	FDR for p.twosided
high_in_treatment	whether normalized read counts for gRNA are higher in LDLhigh than LDLlow cells (gene disruption increases LDL uptake)

## Sheet: LDLRKO_LP-rich_gene
id	num	neg|score	neg|p-value	neg|fdr	neg|rank	neg|goodsgrna	neg|lfc	pos|score	pos|p-value	pos|fdr	pos|rank	pos|goodsgrna	pos|lfc
CHD7	15	3.1581e-22	2.8272e-06	0.000198	1	15	-2.421	1	1	0.999997	1751	0	-2.421
ATP11A	15	1.2098e-21	2.8272e-06	0.000198	2	14	-2.4833	1	1	0.999997	1749	0	-2.4833
HAVCR1	15	6.603e-15	2.8272e-06	0.000198	3	11	-1.8916	0.20449	0.49359	0.881963	596	2	-1.8916
KMT2D	15	8.8411e-15	2.8272e-06	0.000198	4	14	-2.0807	0.98019	0.99159	0.999997	1684	1	-2.0807
HNF4A	15	2.5791e-13	2.8272e-06	0.000198	5	13	-1.6801	0.75114	0.91491	0.999997	1446	2	-1.6801
STK11	15	3.505e-13	2.8272e-06	0.000198	6	12	-1.4998	0.16379	0.42981	0.860113	500	1	-1.4998
CCDC22	15	1.2175e-12	2.8272e-06	0.000198	7	15	-1.5243	1	1	0.999997	1750	0	-1.5243
PIK3C3	15	2.2834e-12	2.8272e-06	0.000198	8	12	-1.5482	0.99544	0.99577	0.999997	1706	1	-1.5482
EMC6	15	3.8761e-12	2.8272e-06	0.000198	9	12	-1.2543	0.93854	0.97857	0.999997	1639	2	-1.2543
GET4	15	4.4855e-12	2.8272e-06	0.000198	10	10	-1.2137	0.92686	0.97608	0.999997	1633	1	-1.2137
KDM6A	15	7.7672e-12	2.8272e-06	0.000198	11	14	-1.2402	1	1	0.999997	1747	0	-1.2402
CDIPT	15	1.1328e-10	2.8272e-06	0.000198	12	13	-1.4732	0.86	0.95357	0.999997	1567	1	-1.4732
TMEM30A	15	1.544e-10	2.8272e-06	0.000198	13	12	-1.3753	0.95388	0.98228	0.999997	1655	2	-1.3753
STRAP	15	2.4191e-10	2.8272e-06	0.000198	14	14	-1.4236	0.97615	0.99021	0.999997	1680	1	-1.4236
EXOC8	15	3.0149e-10	2.8272e-06	0.000198	15	13	-1.2043	0.99999	0.99999	0.999997	1745	0	-1.2043
EXOC7	15	4.5576e-10	2.8272e-06	0.000198	16	13	-1.5295	0.9991	0.99902	0.999997	1724	0	-1.5295
MPDU1	15	8.5312e-10	2.8272e-06	0.000198	17	13	-1.2875	0.99999	0.99999	0.999997	1746	0	-1.2875
SCAP	15	1.1762e-09	2.8272e-06	0.000198	18	12	-1.2558	0.65619	0.87107	0.999997	1346	1	-1.2558
AXIN1	15	1.3604e-09	2.8272e-06	0.000198	19	13	-1.3823	0.92051	0.9748	0.999997	1626	1	-1.3823
C16orf62	15	2.1382e-09	2.8272e-06	0.000198	20	12	-1.5531	0.96874	0.98726	0.999997	1667	1	-1.5531
VPS29	15	3.7583e-09	2.8272e-06	0.000198	21	11	-1.4287	0.98422	0.99222	0.999997	1687	1	-1.4287
BRD2	15	2.5997e-08	2.8272e-06	0.000198	22	12	-1.0085	0.99964	0.99971	0.999997	1734	0	-1.0085
GREB1L	15	4.672e-08	2.8272e-06	0.000198	23	13	-1.0444	0.99998	0.99999	0.999997	1743	0	-1.0444
COMMD3	15	9.9598e-08	2.8272e-06	0.000198	24	12	-1.4025	0.99924	0.99921	0.999997	1727	0	-1.4025
FNDC3B	15	2.4313e-07	2.8272e-06	0.000198	25	13	-1.0202	1	1	0.999997	1748	0	-1.0202
CERS2	15	4.1588e-07	8.4817e-06	0.000571	26	12	-1.0734	0.98811	0.99301	0.999997	1695	1	-1.0734
GDI2	15	1.5765e-06	1.9791e-05	0.001155	27	13	-1.076	0.99768	0.99751	0.999997	1715	0	-1.076
MBTPS2	15	1.6095e-06	1.9791e-05	0.001155	28	9	-0.73566	0.77688	0.92717	0.999997	1476	4	-0.73566
CSNK1A1	15	1.7228e-06	1.9791e-05	0.001155	29	10	-1.0726	0.86368	0.95489	0.999997	1574	2	-1.0726
RAB10	15	1.7785e-06	1.9791e-05	0.001155	30	13	-0.80902	0.99997	0.99999	0.999997	1741	0	-0.80902
STT3A	15	2.2654e-06	2.5445e-05	0.001437	31	12	-0.91993	0.98637	0.99262	0.999997	1693	1	-0.91993
STX4	15	3.2178e-06	3.6754e-05	0.002007	32	12	-0.84254	0.99999	0.99999	0.999997	1744	0	-0.84254
PIAS1	15	3.9239e-06	4.2409e-05	0.002007	33	12	-0.97267	0.89209	0.96511	0.999997	1600	1	-0.97267
CEBPA	15	4.0468e-06	4.2409e-05	0.002007	34	12	-1.1754	0.98566	0.99247	0.999997	1689	1	-1.1754
WRB	15	4.1676e-06	4.2409e-05	0.002007	35	12	-0.67237	0.6625	0.8741	0.999997	1357	1	-0.67237
SETD1A	15	4.1704e-06	4.2409e-05	0.002007	36	13	-0.70689	0.97562	0.99002	0.999997	1677	1	-0.70689
GAGE12B	15	4.2454e-06	4.2409e-05	0.002007	37	13	-1.0463	0.99998	0.99999	0.999997	1742	0	-1.0463
SREBF2	15	5.6363e-06	5.3718e-05	0.002475	38	11	-0.81458	0.98142	0.99177	0.999997	1685	1	-0.81458
UBE2G2	15	7.7691e-06	8.199e-05	0.003681	39	10	-0.98904	0.39491	0.70254	0.964793	976	2	-0.98904
SUMO2	15	9.3182e-06	9.3299e-05	0.004084	40	12	-1.2093	0.053965	0.20205	0.746183	243	2	-1.2093
RANBP1	15	1.048e-05	0.00010461	0.004468	41	12	-0.74186	0.73912	0.90924	0.999997	1433	2	-0.74186
SPNS1	15	1.5962e-05	0.00016115	0.006719	42	12	-0.64661	0.76931	0.92375	0.999997	1468	1	-0.64661
TAF2	15	2.4563e-05	0.00022335	0.008888	43	12	-0.84621	0.99937	0.99939	0.999997	1730	0	-0.84621
OSTC	15	2.5727e-05	0.00022335	0.008888	44	9	-1.0208	0.54149	0.80902	0.999997	1186	1	-1.0208
VPS35	15	2.9695e-05	0.00024032	0.009351	45	9	-0.78928	0.29257	0.59859	0.916192	786	5	-0.78928
COMMD2	15	3.3539e-05	0.00029121	0.011085	46	8	-0.38507	0.25701	0.55754	0.907788	704	5	-0.38507
INTS12	15	4.0918e-05	0.00037037	0.013798	47	12	-0.80507	0.97592	0.99012	0.999997	1678	1	-0.80507
GAGE1	14	5.5417e-05	0.00043822	0.015986	48	11	-1.2729	0.7161	0.89603	0.999997	1414	2	-1.2729
DENND4A	15	6.9831e-05	0.00065309	0.023069	49	9	-0.69806	0.9969	0.99679	0.999997	1711	1	-0.69806
GIGYF2	15	7.1819e-05	0.00065875	0.023069	50	11	-0.75156	0.99985	0.99992	0.999997	1739	0	-0.75156
DCPS	15	7.5697e-05	0.00069267	0.023782	51	10	-0.73535	0.83467	0.94524	0.999997	1534	3	-0.73535
HYOU1	15	7.9765e-05	0.00072095	0.024276	52	11	-1.0667	0.99969	0.99978	0.999997	1735	0	-1.0667
PTAR1	15	9.1851e-05	0.00082838	0.027368	53	10	-1.053	0.97071	0.98799	0.999997	1668	1	-1.053
EXOC2	15	0.00012107	0.0010659	0.033681	54	11	-0.55301	0.88897	0.96407	0.999997	1597	1	-0.55301
MED26	15	0.00012262	0.0010772	0.033681	55	11	-0.79171	0.97084	0.98805	0.999997	1669	2	-0.79171
MBTPS1	15	0.00012348	0.0010772	0.033681	56	9	-0.7068	0.66472	0.87517	0.999997	1361	1	-0.7068
TAF8	15	0.00012555	0.0011055	0.033715	57	10	-0.80847	0.61342	0.8515	0.999997	1286	2	-0.80847
CCDC115	15	0.00012905	0.0011168	0.033715	58	10	-0.79792	0.9816	0.99178	0.999997	1686	1	-0.79792
TAF1	15	0.00013615	0.0012242	0.036332	59	9	-0.71003	0.84312	0.94789	0.999997	1551	3	-0.71003
EXOC3	15	0.00019031	0.0016144	0.047112	60	10	-0.75406	0.99428	0.99514	0.999997	1701	1	-0.75406
SSR2	15	0.00022044	0.0018462	0.052995	61	10	-0.64241	0.99202	0.99416	0.999997	1698	1	-0.64241
SCARB1	15	0.0002403	0.0020215	0.05709	62	11	-0.70847	0.99953	0.99957	0.999997	1732	0	-0.70847
ACTR3	15	0.00026269	0.0021968	0.061056	63	9	-0.5176	0.67219	0.8786	0.999997	1373	2	-0.5176
hsa-mir-6511a-4	15	0.00031391	0.0025417	0.069539	64	11	-0.658	0.99977	0.99986	0.999997	1736	0	-0.658
KIAA1033	15	0.0003725	0.0029601	0.079741	65	10	-0.83014	0.96732	0.98677	0.999997	1664	2	-0.83014
CHMP1A	15	0.00039221	0.0030902	0.081983	66	11	-0.50208	0.9919	0.99412	0.999997	1697	1	-0.50208
CTNNBIP1	15	0.00040735	0.0032202	0.084158	67	9	-0.50895	0.60002	0.84516	0.999997	1268	4	-0.50895
DHX36	15	0.00041915	0.0033164	0.085396	68	11	-0.65541	0.99817	0.99805	0.999997	1716	0	-0.65541
MESDC2	15	0.0004285	0.0033955	0.086167	69	10	-0.41813	0.85582	0.95225	0.999997	1564	1	-0.41813
NHLRC2	15	0.00044704	0.0035369	0.087784	70	10	-1.2889	0.99504	0.99556	0.999997	1704	1	-1.2889
SBK1	15	0.00044991	0.0035595	0.087784	71	11	-0.44996	0.99909	0.99902	0.999997	1723	0	-0.44996
CAND1	15	0.0004694	0.0036952	0.089865	72	10	-0.58726	0.99759	0.99743	0.999997	1713	0	-0.58726
SRCAP	15	0.00067192	0.0053293	0.126954	73	7	-0.40679	0.41926	0.72125	0.978997	1013	2	-0.40679
USO1	15	0.00069506	0.0054651	0.126954	74	10	-0.85379	0.88311	0.96209	0.999997	1591	3	-0.85379
PPIL2	15	0.00070017	0.0055046	0.126954	75	10	-0.65586	0.98599	0.99256	0.999997	1691	1	-0.65586
UBE2Q1	15	0.00070101	0.0055103	0.126954	76	10	-0.64434	0.91852	0.97449	0.999997	1624	1	-0.64434
RBM3	15	0.00077621	0.0060135	0.136749	77	10	-0.67006	0.99964	0.99971	0.999997	1733	0	-0.67006
SAFB	15	0.00080359	0.0061945	0.139058	78	11	-0.63696	0.99982	0.9999	0.999997	1738	0	-0.63696
USP22	15	0.00086671	0.0065677	0.14557	79	10	-0.51613	0.6507	0.86886	0.999997	1339	2	-0.51613
TM9SF2	15	0.00093623	0.00702	0.153651	80	10	-0.60524	0.90584	0.97026	0.999997	1615	3	-0.60524
EXOC1	15	0.0010705	0.0078965	0.1707	81	9	-0.78975	0.90935	0.97146	0.999997	1618	2	-0.78975
PFN1	15	0.001539	0.010701	0.226249	82	9	-0.37159	0.47357	0.76087	0.998233	1085	4	-0.37159
EXT1	15	0.001565	0.010854	0.226249	83	9	-0.48783	0.99912	0.99906	0.999997	1725	0	-0.48783
DYRK1A	15	0.0015655	0.010854	0.226249	84	10	-0.41926	0.99997	0.99999	0.999997	1740	0	-0.41926
PRMT1	15	0.0016119	0.011131	0.229295	85	9	-0.66577	0.92323	0.97529	0.999997	1630	2	-0.66577
WDR37	15	0.001693	0.011674	0.237681	86	9	-0.65268	0.81166	0.93814	0.999997	1516	3	-0.65268
SSX4	15	0.0017545	0.012047	0.24246	87	10	-0.54782	0.97747	0.99077	0.999997	1682	1	-0.54782
KTI12	15	0.0019663	0.013195	0.262545	88	10	-0.44544	0.94033	0.97893	0.999997	1640	2	-0.44544
TCERG1	15	0.0020053	0.013381	0.263266	89	10	-0.84048	0.87438	0.95895	0.999997	1584	1	-0.84048
FNTB	15	0.0020732	0.013771	0.267932	90	9	-0.66705	0.76136	0.91981	0.999997	1459	1	-0.66705
RABIF	15	0.0022819	0.014982	0.287505	91	9	-0.49065	0.87296	0.95836	0.999997	1582	3	-0.49065
EWSR1	15	0.0023073	0.015106	0.287505	92	8	-0.71735	0.98715	0.99275	0.999997	1694	1	-0.71735
SLC35B2	15	0.0024778	0.016039	0.30198	93	9	-0.71731	0.9409	0.97901	0.999997	1641	2	-0.71731
INTS1	15	0.0025766	0.016576	0.308774	94	9	-0.57438	0.88901	0.96407	0.999997	1598	3	-0.57438
NCBP1	15	0.0026929	0.017209	0.317196	95	9	-0.94711	0.92524	0.9757	0.999997	1632	1	-0.94711
SLX4	15	0.0027706	0.01765	0.321476	96	9	-0.40598	0.92164	0.97502	0.999997	1629	2	-0.40598
MRPL28	15	0.002801	0.017809	0.321476	97	10	-0.62012	0.98612	0.99257	0.999997	1692	1	-0.62012
GPN1	15	0.0029817	0.018787	0.335674	98	10	-0.51655	0.94427	0.97986	0.999997	1645	2	-0.51655
CCDC53	15	0.0033942	0.021371	0.374208	99	8	-0.28643	0.22074	0.51377	0.882835	629	3	-0.28643
TAF7	15	0.0034574	0.021744	0.376973	100	10	-0.37698	0.91539	0.97377	0.999997	1622	1	-0.37698
UBA2	15	0.0037335	0.023418	0.400029	101	9	-0.56298	0.95865	0.98377	0.999997	1658	1	-0.56298
TMEM165	15	0.0037571	0.023531	0.400029	102	7	-0.28232	0.25276	0.55239	0.904129	688	2	-0.28232
ARPC4	15	0.0038458	0.023978	0.403703	103	9	-0.56306	0.83194	0.94439	0.999997	1531	2	-0.56306
EIF2B4	15	0.0039478	0.024555	0.407388	104	9	-0.58082	0.64855	0.86786	0.999997	1336	3	-0.58082
hsa-mir-3680-1	10	0.0040756	0.020732	0.366687	105	7	-0.43213	0.97605	0.97679	0.999997	1679	1	-0.43213
EXOC4	15	0.0043603	0.026935	0.440779	106	8	-0.47608	0.55785	0.81963	0.999997	1209	4	-0.47608
PIK3R4	15	0.0046579	0.028422	0.460809	107	8	-0.59519	0.94664	0.98035	0.999997	1649	1	-0.59519
PHKG2	15	0.005154	0.030989	0.49782	108	9	-0.37937	0.99854	0.9984	0.999997	1719	0	-0.37937
MRP63	15	0.0069947	0.039692	0.626126	109	9	-0.50867	0.88067	0.96126	0.999997	1588	3	-0.50867
hsa-mir-6770-1	10	0.0072424	0.034473	0.54874	110	5	-0.39479	0.73214	0.87347	0.999997	1428	2	-0.39479
PIM2	15	0.0075314	0.042185	0.653684	111	9	-0.46199	0.85664	0.95257	0.999997	1565	2	-0.46199
MEF2BNB	15	0.007676	0.04283	0.657851	112	9	-0.4021	0.99914	0.99908	0.999997	1726	0	-0.4021
HNRNPA2B1	15	0.0079511	0.04421	0.673138	113	8	-0.44586	0.38638	0.69571	0.962991	963	3	-0.44586
ZNHIT1	15	0.0090864	0.04927	0.731121	114	9	-0.38874	0.86039	0.95367	0.999997	1568	2	-0.38874
GZF1	15	0.0092327	0.050039	0.733769	115	8	-0.37432	0.90154	0.96865	0.999997	1612	2	-0.37432
IPO9	15	0.0093511	0.050531	0.733769	116	8	-0.5077	0.86223	0.95437	0.999997	1569	2	-0.5077
ATP13A1	15	0.009474	0.051125	0.733769	117	8	-0.44804	0.68638	0.88482	0.999997	1392	2	-0.44804
ZBTB8OS	15	0.0099023	0.053178	0.757023	118	7	-0.37266	0.96471	0.98585	0.999997	1663	2	-0.37266
VPS33A	15	0.010028	0.053726	0.758663	119	9	-0.41241	0.99978	0.99987	0.999997	1737	0	-0.41241
ATP6V1H	15	0.010507	0.055756	0.777503	120	9	-0.66426	0.068466	0.24149	0.77868	275	3	-0.66426
VPS72	15	0.010558	0.055948	0.777503	121	9	-0.50544	0.99823	0.9981	0.999997	1718	0	-0.50544
ALG2	15	0.012118	0.062343	0.852839	122	9	-0.6999	0.89905	0.96768	0.999997	1608	3	-0.6999
DHRSX	15	0.012291	0.062943	0.854363	123	9	-0.44334	0.60781	0.84888	0.999997	1277	4	-0.44334
ATP6AP2	15	0.013029	0.065764	0.879034	124	9	-0.5755	0.67522	0.87999	0.999997	1376	1	-0.5755
MSTO1	15	0.014988	0.073901	0.97294	125	9	-0.48984	0.39336	0.70123	0.964793	974	2	-0.48984
DNAJC13	15	0.015362	0.075456	0.985998	126	7	-0.46152	0.99861	0.99847	0.999997	1720	0	-0.46152
DEXI	15	0.015544	0.07622	0.988596	127	9	-0.37068	0.93001	0.97667	0.999997	1634	1	-0.37068
SEC13	15	0.017078	0.082479	0.999997	128	9	-0.38957	0.91685	0.97416	0.999997	1623	2	-0.38957
HDAC6	15	0.017584	0.084673	0.999997	129	9	-0.33977	0.99925	0.99921	0.999997	1728	0	-0.33977
GPN3	15	0.017744	0.085306	0.999997	130	9	-0.28868	0.99127	0.99389	0.999997	1696	1	-0.28868
CARS	15	0.018663	0.088925	0.999997	131	9	-0.44636	0.99575	0.99594	0.999997	1707	1	-0.44636
NFRKB	15	0.018719	0.089236	0.999997	132	8	-0.26494	0.32945	0.63955	0.935491	849	4	-0.26494
UPF1	15	0.019414	0.092256	0.999997	133	7	-0.23914	0.95102	0.98145	0.999997	1652	1	-0.23914
GLOD5	15	0.019584	0.092996	0.999997	134	9	-0.39439	0.6324	0.86016	0.999997	1311	3	-0.39439
EML4	15	0.01984	0.094003	0.999997	135	8	-0.56517	0.067075	0.2378	0.77868	270	5	-0.56517
TBC1D25	15	0.019933	0.094376	0.999997	136	7	-0.4702	0.83875	0.94643	0.999997	1545	2	-0.4702
C11orf57	15	0.020814	0.097707	0.999997	137	8	-0.36559	0.49937	0.7794	0.999997	1129	1	-0.36559
GNB2L1	15	0.02083	0.097763	0.999997	138	9	-0.48213	0.9737	0.98924	0.999997	1671	2	-0.48213
ZNF263	15	0.020945	0.09821	0.999997	139	8	-0.36206	0.75194	0.91532	0.999997	1449	3	-0.36206
HNRNPU	15	0.021053	0.098526	0.999997	140	8	-0.67408	0.76361	0.92104	0.999997	1460	1	-0.67408
ARPC3	15	0.021312	0.099522	0.999997	141	7	-0.18586	0.10221	0.31608	0.823061	345	5	-0.18586
SLC4A1AP	15	0.021741	0.1009	0.999997	142	8	-0.42733	0.82213	0.9414	0.999997	1523	1	-0.42733
GP1BB	15	0.023486	0.10677	0.999997	143	7	-0.32705	0.66422	0.87496	0.999997	1360	3	-0.32705
CABIN1	15	0.024157	0.10896	0.999997	144	7	-0.2685	0.66969	0.87744	0.999997	1367	3	-0.2685
PSMD9	15	0.024397	0.10993	0.999997	145	8	-0.37522	0.9611	0.98456	0.999997	1660	2	-0.37522
NonTargeting_Human_0778	1	0.024569	0.024662	0.407388	146	1	-1.4468	0.97543	0.97518	0.999997	1676	0	-1.4468
UXT	15	0.025258	0.11284	0.999997	147	7	-0.17259	0.50896	0.78609	0.999997	1141	4	-0.17259
SULT1A2	15	0.025667	0.11428	0.999997	148	7	-0.20547	0.56582	0.82488	0.999997	1220	2	-0.20547
RNF151	15	0.026617	0.11731	0.999997	149	8	-0.2994	0.31293	0.62122	0.928737	816	3	-0.2994
RUVBL1	15	0.027606	0.1207	0.999997	150	6	-0.55597	0.12006	0.35033	0.825315	394	4	-0.55597
PITPNM2	15	0.028329	0.12306	0.999997	151	8	-0.28857	0.96446	0.98576	0.999997	1662	1	-0.28857
DARS	15	0.029722	0.12751	0.999997	152	8	-0.43225	0.42463	0.72529	0.980684	1019	2	-0.43225
MGEA5	15	0.029974	0.12818	0.999997	153	8	-0.39142	0.61222	0.85092	0.999997	1284	3	-0.39142
PKD1	15	0.031371	0.1327	0.999997	154	7	-0.11784	0.22801	0.52296	0.88732	644	3	-0.11784
TRA2B	15	0.031581	0.13331	0.999997	155	8	-0.32352	0.7225	0.90156	0.999997	1418	2	-0.32352
USP39	15	0.033072	0.1379	0.999997	156	6	-0.12081	0.14937	0.40416	0.847531	465	4	-0.12081
ZBTB10	15	0.033392	0.13894	0.999997	157	8	-0.29589	0.99821	0.99807	0.999997	1717	0	-0.29589
CDC73	15	0.034781	0.14346	0.999997	158	7	-0.334	0.9548	0.98252	0.999997	1656	2	-0.334
GTF2E1	15	0.035123	0.14446	0.999997	159	8	-0.50359	0.36498	0.67794	0.950831	924	2	-0.50359
XAGE1A	15	0.035427	0.14543	0.999997	160	7	0.052549	0.35237	0.66435	0.946519	901	6	0.052549
BTF3	15	0.036013	0.14733	0.999997	161	8	-0.31606	0.99764	0.99746	0.999997	1714	0	-0.31606
ELP5	15	0.036944	0.15017	0.999997	162	8	-0.52073	0.42937	0.72875	0.982327	1025	2	-0.52073
FAM57B	15	0.037102	0.15064	0.999997	163	8	-0.44832	0.69056	0.88679	0.999997	1394	4	-0.44832
HSPE1	14	0.03982	0.15785	0.999997	164	8	-0.56045	0.15339	0.40811	0.84923	477	2	-0.56045
SREBF1	15	0.040321	0.16069	0.999997	165	8	-0.29325	0.9951	0.99558	0.999997	1705	1	-0.29325
KCTD5	15	0.040955	0.16251	0.999997	166	6	-0.17915	0.21141	0.5024	0.881963	613	3	-0.17915
WDR7	15	0.041305	0.16373	0.999997	167	8	-0.35025	0.87151	0.95784	0.999997	1579	3	-0.35025
NonTargeting_Human_0068	1	0.041632	0.042038	0.653684	168	1	-0.60455	0.95837	0.95816	0.999997	1657	0	-0.60455
COPS8	15	0.042577	0.16766	0.999997	169	8	-0.39653	0.3285	0.6384	0.935491	847	5	-0.39653
CORO1A	15	0.043327	0.16995	0.999997	170	8	-0.23333	0.98589	0.99253	0.999997	1690	1	-0.23333
EIF6	15	0.044574	0.17357	0.999997	171	8	-0.61347	0.99297	0.99456	0.999997	1699	1	-0.61347
CSNK2A2	15	0.044854	0.17449	0.999997	172	8	-0.31766	0.20845	0.49851	0.881963	604	4	-0.31766
NonTargeting_Human_0107	1	0.046144	0.046613	0.70361	173	1	-0.78431	0.95386	0.95353	0.999997	1654	0	-0.78431
PRPF38B	15	0.046368	0.17872	0.999997	174	7	-0.41827	0.18945	0.47272	0.881963	563	3	-0.41827
DNAJC18	15	0.047513	0.18182	0.999997	175	8	-0.44579	0.87733	0.96008	0.999997	1586	2	-0.44579
NonTargeting_Human_0799	1	0.047539	0.048111	0.720022	176	1	-1.5688	0.95246	0.95221	0.999997	1653	0	-1.5688
ARGLU1	15	0.04862	0.18507	0.999997	177	8	-0.47499	0.99668	0.99659	0.999997	1708	1	-0.47499
ZBTB17	15	0.048769	0.18546	0.999997	178	8	-0.342	0.83857	0.94636	0.999997	1544	2	-0.342
RHOT2	15	0.049249	0.18674	0.999997	179	7	-0.17485	0.6616	0.87365	0.999997	1356	4	-0.17485
DPAGT1	15	0.049331	0.18701	0.999997	180	8	-0.55753	0.1995	0.48736	0.881963	589	3	-0.55753
MGAT1	15	0.049744	0.18831	0.999997	181	7	-0.25443	0.99902	0.99893	0.999997	1722	0	-0.25443
NonTargeting_Human_0957	1	0.050164	0.050893	0.733769	182	1	-4.1837	0.94984	0.94953	0.999997	1651	0	-4.1837
PAM16	15	0.051547	0.19361	0.999997	183	7	-0.17305	0.21706	0.50936	0.881963	623	4	-0.17305
CWC22	15	0.052529	0.19639	0.999997	184	8	-0.52714	0.55282	0.81652	0.999997	1204	4	-0.52714
TP53TG3	15	0.053401	0.19898	0.999997	185	8	-0.29456	0.96775	0.98693	0.999997	1666	1	-0.29456
USP9X	15	0.05359	0.19947	0.999997	186	6	-0.31339	0.8354	0.94544	0.999997	1536	2	-0.31339
SSX2	15	0.053677	0.19975	0.999997	187	8	-0.31519	0.94545	0.98012	0.999997	1648	2	-0.31519
C21orf59	15	0.057326	0.21027	0.999997	188	8	-0.26458	0.8296	0.94364	0.999997	1529	2	-0.26458
UVRAG	15	0.05809	0.21236	0.999997	189	6	-0.14494	0.71496	0.898	0.999997	1412	2	-0.14494
NonTargeting_Human_0588	1	0.058819	0.059375	0.818625	190	1	-1.5708	0.94118	0.94091	0.999997	1642	0	-1.5708
HAPLN1	15	0.059106	0.21531	0.999997	191	8	-0.33052	0.53783	0.8065	0.999997	1182	4	-0.33052
THOC6	15	0.059622	0.21681	0.999997	192	8	-0.2862	0.97715	0.99066	0.999997	1681	1	-0.2862
SPSB3	15	0.059655	0.2169	0.999997	193	7	-0.1746	0.64402	0.86575	0.999997	1330	3	-0.1746
GMPPB	15	0.060315	0.21881	0.999997	194	8	-0.45715	0.36317	0.67616	0.950831	921	3	-0.45715
URI1	15	0.061565	0.22222	0.999997	195	5	0.16676	0.0079686	0.045849	0.605757	81	4	0.16676
GNB1L	15	0.061705	0.22256	0.999997	196	7	-0.1289	0.64469	0.86607	0.999997	1331	2	-0.1289
STX10	15	0.062276	0.2243	0.999997	197	7	-0.074342	0.17095	0.44202	0.867685	519	5	-0.074342
NOTCH2NL	15	0.063577	0.22791	0.999997	198	7	-0.32325	0.19786	0.48512	0.881963	586	5	-0.32325
NonTargeting_Human_0027	1	0.064848	0.065459	0.879034	199	1	-0.99663	0.93515	0.93489	0.999997	1637	0	-0.99663
NDUFA13	15	0.066757	0.23548	0.999997	200	7	-0.26961	0.83563	0.94553	0.999997	1537	2	-0.26961
WDR61	15	0.068353	0.23906	0.999997	201	7	-0.45364	0.65611	0.87106	0.999997	1345	4	-0.45364
POLR2L	15	0.068431	0.23926	0.999997	202	5	-0.2146	0.33724	0.64776	0.938387	869	4	-0.2146
RAB5C	15	0.069342	0.24118	0.999997	203	7	-0.19833	0.84106	0.94722	0.999997	1549	3	-0.19833
NonTargeting_Human_0249	1	0.06977	0.070328	0.932906	204	1	-0.79748	0.93023	0.93019	0.999997	1635	0	-0.79748
EIF3C	13	0.070627	0.23621	0.999997	205	7	-0.4478	0.67567	0.87427	0.999997	1378	2	-0.4478
CPSF3L	15	0.075049	0.25339	0.999997	206	5	-0.26939	0.81034	0.93779	0.999997	1512	3	-0.26939
NonTargeting_Human_0950	1	0.076251	0.077034	0.99181	207	1	-0.92106	0.92375	0.92406	0.999997	1631	0	-0.92106
C9orf41	15	0.077491	0.25859	0.999997	208	7	0.087213	0.0018442	0.012918	0.418867	53	3	0.087213
IRS1	15	0.077711	0.259	0.999997	209	7	-0.26667	0.97209	0.98856	0.999997	1670	1	-0.26667
SPAG7	15	0.077935	0.25936	0.999997	210	7	-0.33595	0.68288	0.88316	0.999997	1386	4	-0.33595
PRPF6	15	0.078538	0.2607	0.999997	211	4	0.16448	0.64907	0.8681	0.999997	1337	4	0.16448
NonTargeting_Human_0246	1	0.07863	0.079471	0.999997	212	1	-0.95964	0.92137	0.92161	0.999997	1628	0	-0.95964
ELP3	15	0.079627	0.26302	0.999997	213	7	-0.37725	0.54504	0.81145	0.999997	1192	4	-0.37725
NonTargeting_Human_0737	1	0.080353	0.081292	0.999997	214	1	-1.3425	0.91965	0.91996	0.999997	1625	0	-1.3425
MTA2	15	0.081267	0.26645	0.999997	215	7	-0.36854	0.82983	0.94374	0.999997	1530	2	-0.36854
EPAS1	15	0.082507	0.26901	0.999997	216	6	0.046576	0.19549	0.48213	0.881963	580	1	0.046576
AP2M1	15	0.082731	0.26945	0.999997	217	7	-0.0061365	0.40212	0.70794	0.966957	985	3	-0.0061365
SNX1	15	0.083549	0.27113	0.999997	218	7	-0.2328	0.90067	0.96829	0.999997	1610	3	-0.2328
ARFRP1	15	0.083575	0.27118	0.999997	219	6	-0.26193	0.85131	0.95063	0.999997	1560	3	-0.26193
CMTR1	15	0.083666	0.27134	0.999997	220	7	-0.46435	0.91247	0.97264	0.999997	1621	3	-0.46435
EIF2S2	15	0.084254	0.27268	0.999997	221	7	-0.19244	0.57226	0.82935	0.999997	1230	5	-0.19244
PHF3	15	0.084444	0.27303	0.999997	222	6	-0.1565	0.2822	0.58662	0.913193	765	4	-0.1565
RCC1	15	0.087758	0.28012	0.999997	223	7	-0.13051	0.93601	0.97788	0.999997	1638	2	-0.13051
RAB7A	15	0.088198	0.28102	0.999997	224	5	0.094859	0.53188	0.80231	0.999997	1177	4	0.094859
NonTargeting_Human_0623	1	0.089951	0.09061	0.999997	225	1	-0.81199	0.91005	0.91035	0.999997	1619	0	-0.81199
RPS14	15	0.091127	0.2874	0.999997	226	4	-0.069868	0.33958	0.65019	0.940116	873	5	-0.069868
PEX6	15	0.09214	0.28946	0.999997	227	7	-0.27205	0.99681	0.99668	0.999997	1710	1	-0.27205
KIAA1328	15	0.092333	0.28991	0.999997	228	7	-0.19824	0.84824	0.94973	0.999997	1556	3	-0.19824
INO80D	15	0.093172	0.29148	0.999997	229	6	-0.29649	0.519	0.79312	0.999997	1160	1	-0.29649
NonTargeting_Human_0278	1	0.095611	0.096451	0.999997	230	1	-0.6802	0.90439	0.90475	0.999997	1613	0	-0.6802
ALG8	15	0.095998	0.29748	0.999997	231	4	-0.15714	0.47765	0.76369	0.998233	1091	3	-0.15714
hsa-mir-3670-1	5	0.096924	0.21197	0.999997	232	3	-0.658	0.88331	0.88381	0.999997	1592	0	-0.658
NonTargeting_Human_0137	1	0.098482	0.099375	0.999997	233	1	-0.70595	0.90152	0.90202	0.999997	1611	0	-0.70595
RNMT	15	0.098699	0.30338	0.999997	234	6	-0.00371	0.97455	0.98955	0.999997	1672	2	-0.00371
PLA2G10	15	0.099057	0.30406	0.999997	235	6	-0.20604	0.11897	0.34812	0.825315	390	3	-0.20604
CAPZB	15	0.099382	0.30477	0.999997	236	7	-0.40852	0.99879	0.99869	0.999997	1721	0	-0.40852
NonTargeting_Human_0215	1	0.10037	0.10149	0.999997	237	1	-0.8973	0.89963	0.89999	0.999997	1609	0	-0.8973
SYP	15	0.1008	0.30755	0.999997	238	5	-0.23694	0.82799	0.94311	0.999997	1527	2	-0.23694
NonTargeting_Human_0554	1	0.10258	0.10376	0.999997	239	1	-1.5349	0.89742	0.89766	0.999997	1607	0	-1.5349
NonTargeting_Human_0582	1	0.10316	0.10431	0.999997	240	1	-1.107	0.89684	0.89711	0.999997	1606	0	-1.107
NonTargeting_Human_0271	1	0.10406	0.10516	0.999997	241	1	-0.79904	0.89594	0.89624	0.999997	1605	0	-0.79904
TBX6	15	0.10434	0.3144	0.999997	242	5	-0.13923	0.9592	0.98392	0.999997	1659	2	-0.13923
NonTargeting_Human_0509	1	0.10455	0.10573	0.999997	243	1	-0.94153	0.89545	0.89577	0.999997	1604	0	-0.94153
NonTargeting_Human_0852	1	0.10591	0.10709	0.999997	244	1	-2.7831	0.89409	0.89431	0.999997	1602	0	-2.7831
LGR5	15	0.10601	0.31768	0.999997	245	5	0.17661	0.103	0.31769	0.823061	348	6	0.17661
NonTargeting_Human_0757	1	0.10775	0.10898	0.999997	246	1	-0.69055	0.89225	0.89244	0.999997	1601	0	-0.69055
RPL17	14	0.10888	0.32378	0.999997	247	6	-0.017605	0.1932	0.46638	0.878413	572	3	-0.017605
ANKHD1-EIF4EBP3	15	0.11027	0.32645	0.999997	248	6	-0.25834	0.98526	0.9924	0.999997	1688	1	-0.25834
NonTargeting_Human_0995	1	0.1121	0.11337	0.999997	249	1	-0.96072	0.8879	0.8881	0.999997	1596	0	-0.96072
NonTargeting_Human_0609	1	0.11292	0.1141	0.999997	250	1	-0.66715	0.88708	0.88725	0.999997	1595	0	-0.66715
PTPMT1	15	0.11394	0.33384	0.999997	251	7	-0.27504	0.94337	0.97962	0.999997	1644	2	-0.27504
COG5	14	0.11407	0.33487	0.999997	252	7	-0.21925	0.33924	0.64327	0.937853	872	2	-0.21925
RBBP5	15	0.11422	0.33434	0.999997	253	7	-0.2844	0.56118	0.82185	0.999997	1215	5	-0.2844
NonTargeting_Human_0696	1	0.11538	0.11656	0.999997	254	1	-0.82114	0.88462	0.88454	0.999997	1593	0	-0.82114
COMMD10	15	0.11678	0.33933	0.999997	255	6	-0.15399	0.27858	0.58241	0.913193	756	3	-0.15399
NMT1	14	0.11699	0.34069	0.999997	256	5	-0.21363	0.9949	0.99506	0.999997	1703	1	-0.21363
NonTargeting_Human_0682	1	0.11768	0.11892	0.999997	257	1	-0.94309	0.88232	0.8823	0.999997	1590	0	-0.94309
PAGE4	15	0.1181	0.34201	0.999997	258	6	-0.21744	0.13635	0.38049	0.834878	436	4	-0.21744
CDC23	15	0.11812	0.34211	0.999997	259	7	-0.1132	0.070938	0.24768	0.77868	285	4	-0.1132
NonTargeting_Human_0921	1	0.11842	0.11964	0.999997	260	1	-1.9695	0.88158	0.88149	0.999997	1589	0	-1.9695
POLR3H	15	0.11943	0.34494	0.999997	261	6	-0.09686	0.097965	0.30796	0.818234	333	4	-0.09686
hsa-mir-6817	13	0.12003	0.33505	0.999997	262	5	0.10502	0.22348	0.50614	0.881963	634	5	0.10502
PGS1	15	0.12076	0.34748	0.999997	263	7	-0.5191	0.87349	0.95858	0.999997	1583	3	-0.5191
NonTargeting_Human_0555	1	0.1217	0.12284	0.999997	264	1	-0.70064	0.8783	0.87803	0.999997	1587	0	-0.70064
NCOR1	15	0.12181	0.3497	0.999997	265	6	-0.19845	0.99927	0.99923	0.999997	1729	0	-0.19845
HIST2H2AA3	15	0.12623	0.35848	0.999997	266	6	-0.18036	0.94964	0.98109	0.999997	1650	2	-0.18036
YPEL1	15	0.12661	0.35918	0.999997	267	7	-0.17492	0.80602	0.93634	0.999997	1509	3	-0.17492
NonTargeting_Human_0453	1	0.12744	0.12838	0.999997	268	1	-0.82814	0.87256	0.87233	0.999997	1581	0	-0.82814
NonTargeting_Human_0427	1	0.12752	0.12847	0.999997	269	1	-0.8555	0.87248	0.87223	0.999997	1580	0	-0.8555
INTS6	15	0.12921	0.36425	0.999997	270	7	-0.02179	0.55547	0.81815	0.999997	1207	5	-0.02179
NonTargeting_Human_0710	1	0.12966	0.13073	0.999997	271	1	-1.0547	0.87034	0.87012	0.999997	1578	0	-1.0547
NonTargeting_Human_0366	1	0.1308	0.1318	0.999997	272	1	-0.57907	0.8692	0.86902	0.999997	1577	0	-0.57907
COPS2	15	0.13106	0.36804	0.999997	273	7	-0.058709	0.75265	0.91564	0.999997	1450	4	-0.058709
NonTargeting_Human_0911	1	0.13277	0.13392	0.999997	274	1	-1.0604	0.86723	0.8672	0.999997	1576	0	-1.0604
PPP1CB	15	0.13345	0.37237	0.999997	275	6	-0.022456	0.11888	0.34798	0.825315	389	6	-0.022456
NonTargeting_Human_0925	1	0.13409	0.13512	0.999997	276	1	-1.3128	0.86591	0.86587	0.999997	1575	0	-1.3128
RTBDN	15	0.13525	0.37566	0.999997	277	6	-0.081596	0.18029	0.45778	0.876043	542	5	-0.081596
MRPL9	15	0.1355	0.37613	0.999997	278	6	-0.29918	0.58355	0.83704	0.999997	1245	2	-0.29918
NonTargeting_Human_0761	1	0.13663	0.13764	0.999997	279	1	-0.9879	0.86337	0.86345	0.999997	1573	0	-0.9879
NonTargeting_Human_0305	1	0.13687	0.13787	0.999997	280	1	-1.235	0.86313	0.86316	0.999997	1572	0	-1.235
NonTargeting_Human_0907	1	0.13696	0.13801	0.999997	281	1	-0.80384	0.86304	0.86306	0.999997	1571	0	-0.80384
NonTargeting_Human_0085	1	0.13704	0.13811	0.999997	282	1	-0.60713	0.86296	0.86296	0.999997	1570	0	-0.60713
NonTargeting_Human_0339	1	0.14098	0.1421	0.999997	283	1	-0.78696	0.85902	0.85909	0.999997	1566	0	-0.78696
HIST2H2BF	15	0.14474	0.39357	0.999997	284	7	-0.26326	0.7827	0.92993	0.999997	1487	1	-0.26326
NonTargeting_Human_0493	1	0.14565	0.14654	0.999997	285	1	-1.0849	0.85435	0.85409	0.999997	1563	0	-1.0849
NonTargeting_Human_0182	1	0.14713	0.14799	0.999997	286	1	-0.59196	0.85287	0.8527	0.999997	1562	0	-0.59196
NonTargeting_Human_0824	1	0.14877	0.14963	0.999997	287	1	-0.80378	0.85123	0.85105	0.999997	1559	0	-0.80378
UBE2I	15	0.14879	0.40117	0.999997	288	5	-0.23616	0.13011	0.3693	0.831058	416	6	-0.23616
NonTargeting_Human_0220	1	0.15057	0.15145	0.999997	289	1	-0.51673	0.84943	0.84931	0.999997	1558	0	-0.51673
NonTargeting_Human_0072	1	0.15139	0.15215	0.999997	290	1	-0.70575	0.84861	0.84856	0.999997	1557	0	-0.70575
CCT6A	15	0.15149	0.40611	0.999997	291	7	-0.41135	0.64565	0.86651	0.999997	1333	4	-0.41135
DNASE2	15	0.15183	0.40677	0.999997	292	7	-0.25202	0.50121	0.78063	0.999997	1131	3	-0.25202
RPL13A	14	0.15218	0.39753	0.999997	293	6	-0.31853	0.62518	0.84626	0.999997	1299	4	-0.31853
SNF8	15	0.15233	0.4077	0.999997	294	7	-0.26093	0.37172	0.68455	0.953045	940	4	-0.26093
NonTargeting_Human_0675	1	0.15353	0.15422	0.999997	295	1	-0.59757	0.84647	0.84651	0.999997	1555	0	-0.59757
NonTargeting_Human_0716	1	0.15451	0.15516	0.999997	296	1	-0.6915	0.84549	0.84548	0.999997	1554	0	-0.6915
NonTargeting_Human_0514	1	0.15591	0.15638	0.999997	297	1	-0.62987	0.84409	0.84415	0.999997	1553	0	-0.62987
NonTargeting_Human_0839	1	0.1564	0.15689	0.999997	298	1	-0.72352	0.8436	0.84363	0.999997	1552	0	-0.72352
MAOB	15	0.15717	0.41682	0.999997	299	6	0.0051531	0.64089	0.8642	0.999997	1323	2	0.0051531
NonTargeting_Human_0035	1	0.15804	0.15864	0.999997	300	1	-0.52521	0.84196	0.84202	0.999997	1550	0	-0.52521
SNRPD1	15	0.15823	0.41882	0.999997	301	4	0.52058	0.05945	0.2172	0.766758	253	8	0.52058
GFER	15	0.15904	0.4203	0.999997	302	6	-0.14832	0.48697	0.77048	0.998233	1106	4	-0.14832
NonTargeting_Human_0118	1	0.15952	0.1601	0.999997	303	1	-0.48618	0.84048	0.84044	0.999997	1548	0	-0.48618
NonTargeting_Human_0437	1	0.15976	0.16032	0.999997	304	1	-0.58213	0.84024	0.8402	0.999997	1547	0	-0.58213
NonTargeting_Human_0113	1	0.16025	0.16082	0.999997	305	1	-0.53881	0.83975	0.8397	0.999997	1546	0	-0.53881
DNLZ	15	0.16085	0.42345	0.999997	306	5	-0.037224	0.45666	0.74888	0.992894	1063	5	-0.037224
MFAP1	15	0.16098	0.42358	0.999997	307	6	-0.14071	0.75181	0.91524	0.999997	1448	4	-0.14071
NonTargeting_Human_0226	1	0.16157	0.16216	0.999997	308	1	-0.46797	0.83843	0.8383	0.999997	1543	0	-0.46797
NonTargeting_Human_0312	1	0.1628	0.16338	0.999997	309	1	-1.1712	0.8372	0.83703	0.999997	1541	0	-1.1712
NonTargeting_Human_0748	1	0.16296	0.16349	0.999997	310	1	-0.70198	0.83704	0.83684	0.999997	1540	0	-0.70198
NonTargeting_Human_0280	1	0.16395	0.16443	0.999997	311	1	-0.63173	0.83605	0.83581	0.999997	1538	0	-0.63173
MLLT11	15	0.16396	0.4277	0.999997	312	6	-0.071828	0.9054	0.97007	0.999997	1614	3	-0.071828
ERP44	14	0.16396	0.41594	0.999997	313	3	0.076474	0.065937	0.23013	0.776407	269	6	0.076474
NonTargeting_Human_0026	1	0.16485	0.16537	0.999997	314	1	-0.7428	0.83515	0.83481	0.999997	1535	0	-0.7428
hsa-mir-550a-1	9	0.16552	0.37235	0.999997	315	3	-0.0090623	0.3243	0.57886	0.913193	838	3	-0.0090623
ZNRF3	15	0.16685	0.43185	0.999997	316	6	-0.23494	0.48092	0.7662	0.998233	1096	4	-0.23494
NonTargeting_Human_0470	1	0.16723	0.16766	0.999997	317	1	-0.42422	0.83277	0.83247	0.999997	1532	0	-0.42422
HYPK	14	0.16868	0.42333	0.999997	318	6	0.21953	0.59169	0.8284	0.999997	1258	4	0.21953
NonTargeting_Human_0669	1	0.17051	0.17086	0.999997	319	1	-0.58325	0.82949	0.82926	0.999997	1528	0	-0.58325
TMEM258	15	0.17313	0.44066	0.999997	320	5	-0.21482	0.43228	0.73105	0.982747	1029	5	-0.21482
NonTargeting_Human_0180	1	0.1751	0.17552	0.999997	321	1	-0.38748	0.8249	0.8247	0.999997	1526	0	-0.38748
NonTargeting_Human_0589	1	0.17527	0.17566	0.999997	322	1	-0.62921	0.82473	0.82457	0.999997	1525	0	-0.62921
ANKRD36	15	0.17633	0.44502	0.999997	323	5	0.22425	0.18341	0.46278	0.876982	550	7	0.22425
ZW10	15	0.1773	0.4464	0.999997	324	4	0.34027	0.02424	0.11106	0.70065	150	9	0.34027
ALDH3A2	15	0.1781	0.44745	0.999997	325	5	0.018308	0.83687	0.94588	0.999997	1539	3	0.018308
NonTargeting_Human_0880	1	0.17863	0.17883	0.999997	326	1	-0.71077	0.82137	0.82115	0.999997	1522	0	-0.71077
HMOX2	15	0.18176	0.45224	0.999997	327	6	-0.09518	0.50292	0.78191	0.999997	1135	5	-0.09518
RAB28	15	0.18234	0.45297	0.999997	328	4	0.089882	0.037265	0.15394	0.726	193	7	0.089882
MRPS21	15	0.18359	0.4547	0.999997	329	6	0.10955	0.25961	0.56031	0.908604	712	4	0.10955
NonTargeting_Human_0521	1	0.18445	0.18421	0.999997	330	1	-0.74847	0.81555	0.81533	0.999997	1519	0	-0.74847
NonTargeting_Human_0793	1	0.18774	0.18766	0.999997	331	1	-0.55076	0.81226	0.81219	0.999997	1517	0	-0.55076
NonTargeting_Human_0888	1	0.1888	0.18871	0.999997	332	1	-0.90501	0.8112	0.81121	0.999997	1515	0	-0.90501
GTF2H3	15	0.18975	0.46297	0.999997	333	6	-0.1997	0.359	0.67175	0.950831	915	4	-0.1997
BOLA2	15	0.19007	0.46342	0.999997	334	6	-0.14003	0.94516	0.98005	0.999997	1647	2	-0.14003
SEZ6L2	15	0.19026	0.46363	0.999997	335	4	-0.227	0.67194	0.87849	0.999997	1371	2	-0.227
NonTargeting_Human_0770	1	0.19126	0.19103	0.999997	336	1	-0.5278	0.80874	0.80885	0.999997	1510	0	-0.5278
METTL14	15	0.1927	0.46684	0.999997	337	5	-0.16555	0.75081	0.91479	0.999997	1444	3	-0.16555
IL17RA	15	0.19514	0.47022	0.999997	338	5	0.024019	0.12898	0.36717	0.831058	414	6	0.024019
GINS2	15	0.19559	0.4708	0.999997	339	5	-0.060407	0.31985	0.62862	0.92966	830	3	-0.060407
NonTargeting_Human_0183	1	0.19578	0.19542	0.999997	340	1	-0.4206	0.80422	0.80473	0.999997	1507	0	-0.4206
SPATA5	15	0.19586	0.47112	0.999997	341	6	-0.33075	0.66026	0.87304	0.999997	1354	2	-0.33075
BMP15	15	0.1985	0.47474	0.999997	342	4	0.078382	0.12541	0.36066	0.830947	407	6	0.078382
NonTargeting_Human_0375	1	0.20062	0.20024	0.999997	343	1	-0.48125	0.79938	0.79986	0.999997	1506	0	-0.48125
GTF3A	15	0.20152	0.47876	0.999997	344	6	0.13772	0.63721	0.86249	0.999997	1318	4	0.13772
ZNF232	15	0.20201	0.47945	0.999997	345	5	0.026831	0.45993	0.75109	0.993174	1069	3	0.026831
NonTargeting_Human_0473	1	0.20275	0.2025	0.999997	346	1	-0.58949	0.79725	0.79782	0.999997	1505	0	-0.58949
NonTargeting_Human_0945	1	0.20381	0.20361	0.999997	347	1	-0.62662	0.79619	0.79674	0.999997	1504	0	-0.62662
ATP6V0D1	15	0.20448	0.48301	0.999997	348	3	0.042392	0.32507	0.63454	0.934469	839	4	0.042392
NonTargeting_Human_0161	1	0.20505	0.20497	0.999997	349	1	-0.34044	0.79495	0.79544	0.999997	1503	0	-0.34044
NonTargeting_Human_0426	1	0.20595	0.20574	0.999997	350	1	-0.61201	0.79405	0.79446	0.999997	1502	0	-0.61201
NonTargeting_Human_0542	1	0.20824	0.20799	0.999997	351	1	-0.97828	0.79176	0.79221	0.999997	1499	0	-0.97828
NonTargeting_Human_0356	1	0.20857	0.20821	0.999997	352	1	-0.47799	0.79143	0.7919	0.999997	1498	0	-0.47799
NonTargeting_Human_0411	1	0.20915	0.20885	0.999997	353	1	-0.41959	0.79085	0.79132	0.999997	1496	0	-0.41959
NonTargeting_Human_0722	1	0.2112	0.21085	0.999997	354	1	-0.53964	0.7888	0.78937	0.999997	1495	0	-0.53964
POLR3C	15	0.21152	0.49262	0.999997	355	6	-0.29582	0.99726	0.99706	0.999997	1712	1	-0.29582
NonTargeting_Human_0060	1	0.21153	0.21117	0.999997	356	1	-0.37703	0.78847	0.78903	0.999997	1494	0	-0.37703
NonTargeting_Human_0234	1	0.21185	0.21144	0.999997	357	1	-0.35365	0.78815	0.78876	0.999997	1493	0	-0.35365
NonTargeting_Human_0151	1	0.21194	0.21153	0.999997	358	1	-0.37782	0.78806	0.78868	0.999997	1492	0	-0.37782
SORT1	15	0.21269	0.49418	0.999997	359	6	-0.079757	0.97872	0.99127	0.999997	1683	1	-0.079757
NonTargeting_Human_0892	1	0.21399	0.21369	0.999997	360	1	-0.82568	0.78601	0.78668	0.999997	1491	0	-0.82568
SEC61B	15	0.21545	0.49765	0.999997	361	6	-0.19048	0.96126	0.98462	0.999997	1661	2	-0.19048
NonTargeting_Human_0924	1	0.21645	0.21618	0.999997	362	1	-0.67149	0.78355	0.78419	0.999997	1489	0	-0.67149
GCFC2	15	0.21652	0.49915	0.999997	363	6	-0.047681	0.80998	0.9377	0.999997	1511	2	-0.047681
NonTargeting_Human_0286	1	0.21678	0.21649	0.999997	364	1	-0.38454	0.78322	0.78389	0.999997	1488	0	-0.38454
POLR2E	15	0.21719	0.50008	0.999997	365	6	0.057269	0.62396	0.85636	0.999997	1297	4	0.057269
NonTargeting_Human_0147	1	0.2176	0.21739	0.999997	366	1	-0.87199	0.7824	0.78305	0.999997	1486	0	-0.87199
NonTargeting_Human_0331	1	0.21932	0.21916	0.999997	367	1	-0.45676	0.78068	0.78132	0.999997	1484	0	-0.45676
NonTargeting_Human_0314	1	0.21965	0.21941	0.999997	368	1	-0.59889	0.78035	0.78097	0.999997	1483	0	-0.59889
NonTargeting_Human_0028	1	0.22047	0.22011	0.999997	369	1	-0.39781	0.77953	0.78012	0.999997	1482	0	-0.39781
WBSCR16	15	0.22048	0.50425	0.999997	370	6	-0.26048	0.22813	0.5231	0.88732	645	5	-0.26048
NonTargeting_Human_0772	1	0.2208	0.22048	0.999997	371	1	-0.58939	0.7792	0.77977	0.999997	1481	0	-0.58939
NonTargeting_Human_0517	1	0.22137	0.22104	0.999997	372	1	-0.50247	0.77863	0.77924	0.999997	1480	0	-0.50247
hsa-mir-638	15	0.2215	0.50582	0.999997	373	5	-0.081897	0.47586	0.76255	0.998233	1088	3	-0.081897
NonTargeting_Human_0478	1	0.22219	0.22188	0.999997	374	1	-0.37371	0.77781	0.77844	0.999997	1479	0	-0.37371
NonTargeting_Human_0639	1	0.22268	0.22235	0.999997	375	1	-0.38659	0.77732	0.77799	0.999997	1477	0	-0.38659
PPP1R8	15	0.22312	0.50787	0.999997	376	6	-0.32743	0.56781	0.82629	0.999997	1225	4	-0.32743
NonTargeting_Human_0850	1	0.224	0.22363	0.999997	377	1	-0.379	0.776	0.77655	0.999997	1475	0	-0.379
NonTargeting_Human_0914	1	0.22547	0.2253	0.999997	378	1	-0.56833	0.77453	0.77498	0.999989	1474	0	-0.56833
NonTargeting_Human_0818	1	0.22588	0.22567	0.999997	379	1	-0.407	0.77412	0.77455	0.999989	1473	0	-0.407
CCT8	15	0.22617	0.51191	0.999997	380	6	-0.16743	0.562	0.82246	0.999997	1216	5	-0.16743
NonTargeting_Human_0635	1	0.22826	0.22831	0.999997	381	1	-1.0997	0.77174	0.77222	0.998636	1472	0	-1.0997
NonTargeting_Human_0464	1	0.22908	0.22911	0.999997	382	1	-0.52878	0.77092	0.77134	0.998233	1471	0	-0.52878
NonTargeting_Human_0534	1	0.22966	0.22967	0.999997	383	1	-0.34457	0.77034	0.77078	0.998233	1470	0	-0.34457
NonTargeting_Human_0295	1	0.23031	0.23022	0.999997	384	1	-0.56229	0.76969	0.77013	0.998233	1469	0	-0.56229
NonTargeting_Human_0112	1	0.23154	0.23154	0.999997	385	1	-0.54974	0.76846	0.76894	0.998233	1467	0	-0.54974
NonTargeting_Human_0782	1	0.23179	0.23173	0.999997	386	1	-0.84909	0.76821	0.76874	0.998233	1466	0	-0.84909
C19orf52	15	0.23187	0.51938	0.999997	387	6	-0.26532	0.56077	0.82156	0.999997	1214	5	-0.26532
RICTOR	15	0.23287	0.52065	0.999997	388	6	0.044726	0.014058	0.071017	0.669111	106	6	0.044726
SMNDC1	15	0.23341	0.52128	0.999997	389	4	0.23378	0.53753	0.80623	0.999997	1181	4	0.23378
NonTargeting_Human_0994	1	0.23384	0.23385	0.999997	390	1	-0.42342	0.76616	0.76661	0.998233	1465	0	-0.42342
NonTargeting_Human_0575	1	0.23482	0.23473	0.999997	391	1	-0.42776	0.76518	0.76544	0.998233	1464	0	-0.42776
NonTargeting_Human_0018	1	0.23507	0.23501	0.999997	392	1	-0.31828	0.76493	0.76518	0.998233	1463	0	-0.31828
NonTargeting_Human_0301	1	0.23605	0.23593	0.999997	393	1	-1.0942	0.76395	0.76418	0.998233	1462	0	-1.0942
IGF1R	15	0.2361	0.52459	0.999997	394	6	-0.074697	0.6175	0.85331	0.999997	1291	3	-0.074697
NonTargeting_Human_0391	1	0.23622	0.23613	0.999997	395	1	-0.43055	0.76378	0.76405	0.998233	1461	0	-0.43055
TOMM22	15	0.23673	0.52542	0.999997	396	5	-0.0058613	0.097714	0.3074	0.818234	332	7	-0.0058613
GART	15	0.23837	0.52736	0.999997	397	6	-0.22	0.94234	0.97934	0.999997	1643	1	-0.22
NonTargeting_Human_0191	1	0.23868	0.23856	0.999997	398	1	-0.42337	0.76132	0.76156	0.998233	1458	0	-0.42337
DET1	15	0.23905	0.52822	0.999997	399	5	-0.1576	0.49288	0.77482	0.999989	1119	1	-0.1576
NonTargeting_Human_0904	1	0.23991	0.23979	0.999997	400	1	-0.41344	0.76009	0.76047	0.998233	1457	0	-0.41344
NonTargeting_Human_0241	1	0.24007	0.23996	0.999997	401	1	-0.43577	0.75993	0.76032	0.998233	1456	0	-0.43577
MEF2B	15	0.24067	0.53006	0.999997	402	3	0.2362	0.5186	0.79285	0.999997	1158	4	0.2362
ROR1	15	0.24122	0.53082	0.999997	403	6	0.014872	0.2291	0.52421	0.88732	647	6	0.014872
NonTargeting_Human_0596	1	0.2413	0.24123	0.999997	404	1	-0.3688	0.7587	0.75909	0.998233	1454	0	-0.3688
NonTargeting_Human_0951	1	0.24286	0.24274	0.999997	405	1	-0.62597	0.75714	0.7576	0.998156	1452	0	-0.62597
PFDN6	15	0.24431	0.53489	0.999997	406	6	0.043618	0.20789	0.49786	0.881963	603	6	0.043618
HDAC3	15	0.24521	0.53606	0.999997	407	6	0.19685	0.69165	0.88736	0.999997	1397	4	0.19685
NonTargeting_Human_0406	1	0.24557	0.24554	0.999997	408	1	-0.30432	0.75443	0.75479	0.99596	1451	0	-0.30432
COX5B	15	0.24634	0.53754	0.999997	409	4	0.17951	0.2612	0.5622	0.909598	715	6	0.17951
SLC7A6OS	15	0.24698	0.53839	0.999997	410	5	0.071945	0.3667	0.67986	0.950831	929	6	0.071945
EBP	15	0.24949	0.54156	0.999997	411	5	-0.10682	0.42976	0.72907	0.982327	1026	4	-0.10682
NonTargeting_Human_0222	1	0.2509	0.25073	0.999997	412	1	-0.80638	0.7491	0.74936	0.992894	1443	0	-0.80638
NLRP8	15	0.25098	0.54356	0.999997	413	5	0.12278	0.20906	0.49936	0.881963	607	3	0.12278
RNPEP	15	0.25253	0.54545	0.999997	414	3	-0.026755	0.69079	0.88691	0.999997	1395	3	-0.026755
NRBP1	15	0.2527	0.54565	0.999997	415	6	-0.039289	0.62158	0.85523	0.999997	1296	2	-0.039289
EPN1	15	0.25356	0.54685	0.999997	416	6	-0.22899	0.88495	0.96281	0.999997	1594	1	-0.22899
NonTargeting_Human_0050	1	0.25361	0.25341	0.999997	417	1	-0.75998	0.74639	0.74682	0.992169	1442	0	-0.75998
NonTargeting_Human_0727	1	0.2555	0.2553	0.999997	418	1	-0.40873	0.7445	0.74484	0.991051	1440	0	-0.40873
CLEC12B	15	0.25558	0.54932	0.999997	419	5	-0.20564	0.62901	0.85855	0.999997	1306	4	-0.20564
ZG16B	15	0.2566	0.55069	0.999997	420	6	-0.18453	0.52271	0.7957	0.999997	1166	2	-0.18453
VPS13C	15	0.25701	0.55125	0.999997	421	4	0.035835	0.086701	0.2851	0.7989	307	7	0.035835
NAA60	15	0.25736	0.55169	0.999997	422	5	0.1115	0.30451	0.61183	0.924957	801	6	0.1115
NonTargeting_Human_0360	1	0.25738	0.25725	0.999997	423	1	-0.38057	0.74262	0.74309	0.99097	1439	0	-0.38057
NonTargeting_Human_0686	1	0.25763	0.25752	0.999997	424	1	-0.35814	0.74237	0.74285	0.99097	1438	0	-0.35814
NonTargeting_Human_0990	1	0.25837	0.25839	0.999997	425	1	-0.44278	0.74163	0.74203	0.99097	1437	0	-0.44278
TSPAN11	15	0.2589	0.55345	0.999997	426	5	-0.24954	0.33234	0.64256	0.937603	854	5	-0.24954
NonTargeting_Human_0663	1	0.25993	0.25976	0.999997	427	1	-0.4164	0.74007	0.74043	0.989687	1435	0	-0.4164
NonTargeting_Human_0002	1	0.26173	0.26148	0.999997	428	1	-0.39367	0.73827	0.73869	0.988114	1432	0	-0.39367
SVOP	15	0.26221	0.55757	0.999997	429	5	-0.11252	0.85225	0.95099	0.999997	1561	3	-0.11252
NonTargeting_Human_0864	1	0.26222	0.26204	0.999997	430	1	-0.35607	0.73778	0.73817	0.988114	1431	0	-0.35607
NCBP2	15	0.2632	0.55877	0.999997	431	6	-0.11744	0.012455	0.064656	0.658214	100	6	-0.11744
NonTargeting_Human_0946	1	0.26452	0.26449	0.999997	432	1	-0.63616	0.73548	0.73578	0.986487	1430	0	-0.63616
NOP16	15	0.26453	0.56045	0.999997	433	6	-0.13866	0.11623	0.34276	0.825315	381	5	-0.13866
NonTargeting_Human_0537	1	0.26567	0.2657	0.999997	434	1	-0.38033	0.73433	0.73448	0.986253	1429	0	-0.38033
INPP5J	15	0.2657	0.56196	0.999997	435	4	0.092548	0.45827	0.75003	0.992894	1066	3	0.092548
CPSF4	15	0.26636	0.56282	0.999997	436	4	0.074253	0.4855	0.76945	0.998233	1103	5	0.074253
PFDN2	14	0.26777	0.56375	0.999997	437	5	-0.27952	0.99392	0.99435	0.999997	1700	1	-0.27952
EIF5A	15	0.26842	0.56539	0.999997	438	6	-0.20997	0.64195	0.8647	0.999997	1325	4	-0.20997
NonTargeting_Human_0790	1	0.26903	0.269	0.999997	439	1	-0.63296	0.73097	0.73131	0.982747	1426	0	-0.63296
NonTargeting_Human_0369	1	0.27034	0.27019	0.999997	440	1	-0.37269	0.72966	0.72995	0.982432	1425	0	-0.37269
NonTargeting_Human_0265	1	0.271	0.27094	0.999997	441	1	-0.27746	0.729	0.72931	0.982327	1424	0	-0.27746
NonTargeting_Human_0989	1	0.27264	0.2725	0.999997	442	1	-0.78216	0.72736	0.72776	0.982327	1423	0	-0.78216
NonTargeting_Human_0393	1	0.27305	0.27286	0.999997	443	1	-0.39505	0.72695	0.72735	0.982327	1422	0	-0.39505
GAPDH	15	0.2732	0.57124	0.999997	444	6	-0.32348	0.29827	0.60498	0.919586	793	4	-0.32348
C1GALT1	15	0.27417	0.57255	0.999997	445	5	-0.10156	0.80513	0.93612	0.999997	1508	2	-0.10156
hsa-mir-6859-1	14	0.27451	0.57035	0.999997	446	5	0.23022	0.21514	0.49707	0.881963	622	3	0.23022
NonTargeting_Human_0796	1	0.27617	0.27599	0.999997	447	1	-0.58451	0.72383	0.72422	0.979995	1420	0	-0.58451
RBM14	15	0.27715	0.5762	0.999997	448	6	-0.089334	0.36418	0.67709	0.950831	923	3	-0.089334
NonTargeting_Human_0114	1	0.27724	0.27712	0.999997	449	1	-0.54981	0.72276	0.72315	0.979306	1419	0	-0.54981
NonTargeting_Human_0309	1	0.27797	0.27771	0.999997	450	1	-0.36003	0.72203	0.72236	0.979306	1417	0	-0.36003
NonTargeting_Human_0364	1	0.27912	0.27883	0.999997	451	1	-0.40474	0.72088	0.72106	0.978997	1416	0	-0.40474
NonTargeting_Human_0694	1	0.28027	0.27991	0.999997	452	1	-0.48159	0.71973	0.71994	0.978734	1415	0	-0.48159
SETDB1	15	0.28041	0.58012	0.999997	453	6	-0.25892	0.40665	0.71143	0.970185	991	4	-0.25892
NonTargeting_Human_0351	1	0.28413	0.28366	0.999997	454	1	-0.46033	0.71587	0.71611	0.975043	1413	0	-0.46033
C12orf43	15	0.28456	0.58531	0.999997	455	6	-0.13321	0.61057	0.85005	0.999997	1281	4	-0.13321
VOPP1	15	0.28491	0.58578	0.999997	456	6	-0.24233	0.91216	0.97252	0.999997	1620	3	-0.24233
SNAPC3	15	0.28676	0.58804	0.999997	457	6	-0.12001	0.25182	0.55127	0.904129	685	4	-0.12001
ACO2	15	0.28715	0.58858	0.999997	458	5	-0.22123	0.63664	0.86225	0.999997	1316	4	-0.22123
GTF2A2	15	0.28753	0.58897	0.999997	459	5	-0.062265	0.34038	0.65112	0.940517	876	4	-0.062265
NonTargeting_Human_0446	1	0.28979	0.2894	0.999997	460	1	-0.22008	0.71021	0.71026	0.969344	1410	0	-0.22008
SRP14	15	0.29067	0.59265	0.999997	461	6	-0.18064	0.039873	0.16183	0.726	198	3	-0.18064
ZNF764	15	0.29116	0.59323	0.999997	462	6	-0.15252	0.63757	0.8627	0.999997	1319	1	-0.15252
MED8	15	0.29165	0.59379	0.999997	463	6	-0.11429	0.038068	0.15642	0.726	195	5	-0.11429
NIPSNAP1	15	0.29177	0.59391	0.999997	464	6	-0.15369	0.97531	0.98986	0.999997	1675	1	-0.15369
NonTargeting_Human_0097	1	0.29208	0.29171	0.999997	465	1	-0.28152	0.70792	0.70796	0.966957	1409	0	-0.28152
NonTargeting_Human_0013	1	0.29331	0.29291	0.999997	466	1	-0.2352	0.70669	0.70684	0.966928	1408	0	-0.2352
NonTargeting_Human_0752	1	0.29446	0.29423	0.999997	467	1	-0.31054	0.70554	0.70586	0.966345	1407	0	-0.31054
TPP2	15	0.29608	0.5992	0.999997	468	6	-0.19846	0.78506	0.93059	0.999997	1490	3	-0.19846
NonTargeting_Human_0260	1	0.29619	0.29611	0.999997	469	1	-0.30749	0.70381	0.70417	0.964793	1406	0	-0.30749
NonTargeting_Human_0895	1	0.29627	0.29618	0.999997	470	1	-0.37281	0.70373	0.70404	0.964793	1405	0	-0.37281
NonTargeting_Human_0569	1	0.29701	0.29693	0.999997	471	1	-0.40173	0.70299	0.70333	0.964793	1404	0	-0.40173
NonTargeting_Human_0332	1	0.29725	0.29722	0.999997	472	1	-0.28012	0.70275	0.70309	0.964793	1403	0	-0.28012
DNAJC17	15	0.30015	0.60399	0.999997	473	3	0.53121	0.017808	0.086251	0.699189	130	9	0.53121
NonTargeting_Human_0033	1	0.30029	0.3001	0.999997	474	1	-0.30285	0.69971	0.70006	0.964443	1402	0	-0.30285
NonTargeting_Human_0866	1	0.30103	0.30089	0.999997	475	1	-0.35322	0.69897	0.6994	0.96429	1401	0	-0.35322
NonTargeting_Human_0319	1	0.30119	0.30108	0.999997	476	1	-0.29644	0.69881	0.69923	0.96429	1400	0	-0.29644
NonTargeting_Human_0039	1	0.30226	0.30208	0.999997	477	1	-0.24702	0.69774	0.69814	0.96429	1399	0	-0.24702
CDT1	15	0.30357	0.60799	0.999997	478	5	-0.27856	0.18656	0.46805	0.878413	556	2	-0.27856
NonTargeting_Human_0560	1	0.3039	0.30361	0.999997	479	1	-0.62739	0.6961	0.69646	0.96327	1398	0	-0.62739
SAP130	15	0.30402	0.60859	0.999997	480	6	-0.079602	0.97499	0.98976	0.999997	1673	2	-0.079602
GTF3C4	15	0.30476	0.60944	0.999997	481	6	-0.07158	0.64828	0.86776	0.999997	1335	4	-0.07158
POLRMT	15	0.30487	0.60962	0.999997	482	5	-0.16104	0.57583	0.83173	0.999997	1233	3	-0.16104
NDUFB10	15	0.30531	0.61024	0.999997	483	5	0.067416	0.09236	0.29664	0.804057	319	5	0.067416
LSM2	15	0.30533	0.61027	0.999997	484	4	-0.027111	0.027775	0.1246	0.704966	168	6	-0.027111
hsa-mir-6831	12	0.30577	0.58823	0.999997	485	5	-0.056507	0.27221	0.55045	0.904129	746	4	-0.056507
NonTargeting_Human_0206	1	0.30849	0.30787	0.999997	486	1	-0.40756	0.69151	0.6921	0.958755	1396	0	-0.40756
EEFSEC	15	0.30876	0.61414	0.999997	487	6	-0.16357	0.26846	0.57073	0.909598	739	4	-0.16357
TBC1D22A	15	0.31176	0.61769	0.999997	488	6	0.013199	0.41163	0.71541	0.974847	997	4	0.013199
ELOF1	15	0.31277	0.61887	0.999997	489	6	-0.17995	0.68415	0.88382	0.999997	1389	3	-0.17995
CTDP1	15	0.31293	0.61908	0.999997	490	3	-0.11753	0.66334	0.87454	0.999997	1359	4	-0.11753
NonTargeting_Human_0196	1	0.31407	0.31353	0.999997	491	1	-0.21556	0.68593	0.68663	0.953436	1391	0	-0.21556
FURIN	15	0.31453	0.6209	0.999997	492	6	-0.063491	0.81539	0.93927	0.999997	1518	3	-0.063491
NonTargeting_Human_0578	1	0.31489	0.31423	0.999997	493	0	-0.34651	0.68511	0.6858	0.953045	1390	0	-0.34651
NonTargeting_Human_0634	1	0.31596	0.31534	0.999997	494	0	-0.23732	0.68404	0.68477	0.953045	1388	0	-0.23732
NonTargeting_Human_0237	1	0.31637	0.31574	0.999997	495	0	-0.48986	0.68363	0.68427	0.953045	1387	0	-0.48986
CTR9	15	0.31685	0.6237	0.999997	496	6	-0.29004	0.9323	0.97716	0.999997	1636	2	-0.29004
NonTargeting_Human_0692	1	0.31743	0.31666	0.999997	497	0	-0.29945	0.68257	0.68313	0.953045	1385	0	-0.29945
NonTargeting_Human_0640	1	0.31858	0.31797	0.999997	498	0	-0.31068	0.68142	0.68202	0.952331	1384	0	-0.31068
NonTargeting_Human_0374	1	0.32096	0.32053	0.999997	499	0	-0.20608	0.67904	0.67951	0.950831	1383	0	-0.20608
NonTargeting_Human_0255	1	0.32301	0.32256	0.999997	500	0	-0.23217	0.67699	0.67751	0.950831	1382	0	-0.23217
NonTargeting_Human_0546	1	0.32342	0.32301	0.999997	501	0	-0.18884	0.67658	0.67712	0.950831	1381	0	-0.18884
NonTargeting_Human_0876	1	0.32358	0.32317	0.999997	502	0	-0.47186	0.67642	0.67698	0.950831	1380	0	-0.47186
NonTargeting_Human_0948	1	0.32424	0.3238	0.999997	503	0	-0.229	0.67576	0.67628	0.950831	1379	0	-0.229
NonTargeting_Human_0171	1	0.32473	0.32425	0.999997	504	0	-0.23772	0.67527	0.67593	0.950831	1377	0	-0.23772
NonTargeting_Human_0179	1	0.32547	0.325	0.999997	505	0	-0.43813	0.67453	0.67516	0.950831	1375	0	-0.43813
NonTargeting_Human_0212	1	0.3258	0.32529	0.999997	506	0	-0.36913	0.6742	0.67484	0.950831	1374	0	-0.36913
NonTargeting_Human_0709	1	0.32785	0.3274	0.999997	507	0	-0.27972	0.67215	0.673	0.950831	1372	0	-0.27972
LIMS3	15	0.32932	0.63607	0.999997	508	5	-0.10761	0.19282	0.47808	0.881963	570	5	-0.10761
NonTargeting_Human_0938	1	0.3299	0.32948	0.999997	509	0	-0.2358	0.6701	0.67109	0.950715	1368	0	-0.2358
MCM3	15	0.33114	0.6375	0.999997	510	4	0.40357	0.21269	0.50398	0.881963	618	6	0.40357
NonTargeting_Human_0343	1	0.33146	0.33094	0.999997	511	0	-0.36151	0.66854	0.6696	0.949373	1365	0	-0.36151
NonTargeting_Human_0741	1	0.33171	0.33118	0.999997	512	0	-0.20443	0.66829	0.66939	0.949373	1364	0	-0.20443
NonTargeting_Human_0144	1	0.33195	0.33142	0.999997	513	0	-0.28361	0.66805	0.66918	0.949373	1363	0	-0.28361
LAS1L	15	0.33201	0.63829	0.999997	514	4	-0.065103	0.59216	0.84146	0.999997	1259	2	-0.065103
NonTargeting_Human_0744	1	0.33458	0.33418	0.999997	515	0	-0.17885	0.66542	0.66639	0.947501	1362	0	-0.17885
PRELP	15	0.33668	0.64228	0.999997	516	3	0.079605	0.56649	0.82537	0.999997	1221	4	0.079605
NonTargeting_Human_0758	1	0.33696	0.33681	0.999997	517	0	-0.23251	0.66304	0.66408	0.946519	1358	0	-0.23251
NonTargeting_Human_0760	1	0.3386	0.33852	0.999997	518	0	-0.27962	0.6614	0.66235	0.945867	1355	0	-0.27962
NonTargeting_Human_0810	1	0.34073	0.34076	0.999997	519	0	-0.37782	0.65927	0.66041	0.943985	1353	0	-0.37782
NonTargeting_Human_0621	1	0.34081	0.34083	0.999997	520	0	-0.30893	0.65919	0.66037	0.943985	1352	0	-0.30893
NonTargeting_Human_0004	1	0.34106	0.34108	0.999997	521	0	-0.17979	0.65894	0.66011	0.943985	1351	0	-0.17979
NonTargeting_Human_0261	1	0.34114	0.3412	0.999997	522	0	-0.1915	0.65886	0.66005	0.943985	1350	0	-0.1915
FER	15	0.34277	0.64733	0.999997	523	4	0.043233	0.26589	0.56781	0.909598	732	4	0.043233
NonTargeting_Human_0304	1	0.34319	0.34349	0.999997	524	0	-0.1848	0.65681	0.65823	0.943955	1348	0	-0.1848
NonTargeting_Human_0667	1	0.34336	0.3437	0.999997	525	0	-0.26525	0.65664	0.65807	0.943955	1347	0	-0.26525
NonTargeting_Human_0545	1	0.34401	0.3443	0.999997	526	0	-0.27018	0.65599	0.65738	0.943955	1344	0	-0.27018
NonTargeting_Human_0422	1	0.34508	0.3453	0.999997	527	0	-0.19804	0.65492	0.6563	0.943492	1343	0	-0.19804
NonTargeting_Human_0690	1	0.34532	0.34553	0.999997	528	0	-0.31118	0.65468	0.65605	0.943492	1341	0	-0.31118
CHAF1B	15	0.34642	0.65043	0.999997	529	5	-0.28802	0.11349	0.33771	0.825315	377	4	-0.28802
NonTargeting_Human_0156	1	0.34836	0.34841	0.999997	530	0	-0.28171	0.65164	0.65303	0.940517	1340	0	-0.28171
hsa-mir-6886	13	0.34883	0.6374	0.999997	531	4	0.098319	0.24659	0.5349	0.895378	675	5	0.098319
NonTargeting_Human_0104	1	0.35238	0.35249	0.999997	532	0	-0.15257	0.64762	0.64911	0.93933	1334	0	-0.15257
NonTargeting_Human_0371	1	0.35435	0.35444	0.999997	533	0	-0.21121	0.64565	0.64706	0.938387	1332	0	-0.21121
COG2	15	0.35614	0.65925	0.999997	534	5	0.028438	0.42105	0.72265	0.979306	1015	3	0.028438
NonTargeting_Human_0454	1	0.35623	0.35629	0.999997	535	0	-0.20819	0.64377	0.64504	0.937944	1329	0	-0.20819
NonTargeting_Human_0417	1	0.35648	0.35648	0.999997	536	0	-0.2199	0.64352	0.64482	0.937944	1328	0	-0.2199
NonTargeting_Human_0483	1	0.35664	0.35663	0.999997	537	0	-0.36275	0.64336	0.64464	0.937944	1327	0	-0.36275
NonTargeting_Human_0543	1	0.35927	0.35921	0.999997	538	0	-0.19961	0.64073	0.64196	0.937502	1322	0	-0.19961
PDHX	15	0.35948	0.66229	0.999997	539	5	-0.11817	0.4538	0.74663	0.992169	1061	5	-0.11817
RUVBL2	14	0.35971	0.65297	0.999997	540	5	-0.18593	0.30562	0.61331	0.925781	802	5	-0.18593
NonTargeting_Human_0831	1	0.36132	0.36111	0.999997	541	0	-0.25781	0.63868	0.63985	0.935491	1321	0	-0.25781
NonTargeting_Human_0030	1	0.36239	0.36218	0.999997	542	0	-0.181	0.63761	0.63883	0.935491	1320	0	-0.181
SRP19	15	0.36283	0.66499	0.999997	543	5	-0.30674	0.017695	0.085826	0.699189	129	5	-0.30674
NonTargeting_Human_0812	1	0.36304	0.36288	0.999997	544	0	-0.25806	0.63696	0.63813	0.935491	1317	0	-0.25806
CEP120	15	0.36395	0.66591	0.999997	545	5	-0.095177	0.81707	0.93977	0.999997	1521	3	-0.095177
NonTargeting_Human_0771	1	0.36485	0.36464	0.999997	546	0	-0.38367	0.63515	0.63638	0.934817	1315	0	-0.38367
NonTargeting_Human_0981	1	0.36567	0.36556	0.999997	547	0	-0.33434	0.63433	0.63548	0.934817	1314	0	-0.33434
ATXN7L3	15	0.36647	0.66813	0.999997	548	5	0.21443	0.024355	0.11156	0.70065	152	8	0.21443
NonTargeting_Human_0598	1	0.36698	0.36687	0.999997	549	0	-0.21219	0.63302	0.63428	0.934469	1313	0	-0.21219
NonTargeting_Human_0661	1	0.36723	0.36714	0.999997	550	0	-0.17871	0.63277	0.63406	0.934469	1312	0	-0.17871
NonTargeting_Human_0901	1	0.36895	0.36896	0.999997	551	0	-0.32356	0.63105	0.63228	0.933486	1310	0	-0.32356
RAB23	15	0.36896	0.67014	0.999997	552	4	-0.086889	0.35415	0.66639	0.947501	903	4	-0.086889
AHSP	15	0.36993	0.67094	0.999997	553	3	0.27561	0.068786	0.24238	0.77868	277	8	0.27561
NonTargeting_Human_0940	1	0.3701	0.37	0.999997	554	0	-0.23084	0.6299	0.63103	0.932435	1307	0	-0.23084
MKL1	15	0.37011	0.67104	0.999997	555	5	0.01487	0.14909	0.40365	0.847531	463	5	0.01487
CCDC43	15	0.37102	0.6718	0.999997	556	5	0.49655	0.0014919	0.010712	0.36072	51	9	0.49655
NonTargeting_Human_0082	1	0.37248	0.3724	0.999997	557	0	-0.14096	0.62752	0.62844	0.92966	1305	0	-0.14096
NonTargeting_Human_0728	1	0.37256	0.37249	0.999997	558	0	-0.14654	0.62744	0.62835	0.92966	1304	0	-0.14654
NonTargeting_Human_0628	1	0.37305	0.37304	0.999997	559	0	-0.1334	0.62695	0.62786	0.92966	1303	0	-0.1334
NonTargeting_Human_0266	1	0.37354	0.37353	0.999997	560	0	-0.17161	0.62646	0.62737	0.92966	1302	0	-0.17161
NonTargeting_Human_0211	1	0.37404	0.37408	0.999997	561	0	-0.11278	0.62596	0.62686	0.92966	1301	0	-0.11278
NonTargeting_Human_0530	1	0.37461	0.37471	0.999997	562	0	-0.10754	0.62539	0.62623	0.92966	1300	0	-0.10754
KAT7	15	0.37562	0.67575	0.999997	563	3	0.48754	0.0077918	0.04499	0.605757	80	9	0.48754
NonTargeting_Human_0974	1	0.37592	0.37602	0.999997	564	0	-0.32338	0.62408	0.62491	0.92966	1298	0	-0.32338
PDRG1	15	0.37825	0.67788	0.999997	565	5	-0.25593	0.13436	0.37715	0.833387	432	4	-0.25593
ZNF213	15	0.37887	0.67838	0.999997	566	4	-0.090528	0.63034	0.85913	0.999997	1309	3	-0.090528
TSPYL4	15	0.38022	0.6795	0.999997	567	3	0.28946	0.040451	0.16366	0.726	201	8	0.28946
NonTargeting_Human_0856	1	0.38043	0.38057	0.999997	568	0	-0.20575	0.61957	0.6201	0.928032	1294	0	-0.20575
NonTargeting_Human_0791	1	0.38052	0.38064	0.999997	569	0	-0.20402	0.61948	0.62005	0.928032	1293	0	-0.20402
NonTargeting_Human_0207	1	0.3815	0.38184	0.999997	570	0	-0.16886	0.6185	0.61913	0.928032	1292	0	-0.16886
NonTargeting_Human_0845	1	0.38298	0.38325	0.999997	571	0	-0.21027	0.61702	0.61775	0.927683	1290	0	-0.21027
NonTargeting_Human_0949	1	0.38322	0.38353	0.999997	572	0	-0.30892	0.61678	0.61756	0.927683	1289	0	-0.30892
GTF2H2	15	0.38331	0.68203	0.999997	573	5	-0.032278	0.021319	0.10009	0.70065	141	5	-0.032278
NonTargeting_Human_0997	1	0.38388	0.38419	0.999997	574	0	-0.2813	0.61612	0.61696	0.927683	1288	0	-0.2813
NonTargeting_Human_0800	1	0.38413	0.38441	0.999997	575	0	-0.20464	0.61587	0.61668	0.927683	1287	0	-0.20464
INSR	15	0.38609	0.68448	0.999997	576	5	-0.083241	0.29871	0.60553	0.919586	794	5	-0.083241
NonTargeting_Human_0655	1	0.38831	0.38871	0.999997	577	0	-0.19522	0.61169	0.61224	0.924957	1283	0	-0.19522
NonTargeting_Human_0805	1	0.38987	0.39014	0.999997	578	0	-0.11621	0.61013	0.61086	0.924476	1280	0	-0.11621
NonTargeting_Human_0008	1	0.38995	0.39026	0.999997	579	0	-0.12963	0.61005	0.61081	0.924476	1279	0	-0.12963
NonTargeting_Human_0590	1	0.39118	0.39154	0.999997	580	0	-0.20372	0.60882	0.60954	0.92408	1278	0	-0.20372
WDR18	15	0.39318	0.69066	0.999997	581	5	-0.055901	0.74122	0.91018	0.999997	1436	1	-0.055901
RPUSD4	15	0.39544	0.69268	0.999997	582	5	-0.078913	0.14485	0.39603	0.84159	456	2	-0.078913
NonTargeting_Human_0539	1	0.39561	0.39583	0.999997	583	0	-0.22472	0.60439	0.60517	0.919586	1275	0	-0.22472
NonTargeting_Human_0288	1	0.39569	0.39592	0.999997	584	0	-0.10391	0.60431	0.60507	0.919586	1274	0	-0.10391
NonTargeting_Human_0680	1	0.39758	0.39779	0.999997	585	0	-0.21009	0.60242	0.60305	0.919586	1272	0	-0.21009
NonTargeting_Human_0889	1	0.39766	0.39785	0.999997	586	0	-0.16664	0.60234	0.60296	0.919586	1271	0	-0.16664
DAP3	15	0.39855	0.69524	0.999997	587	5	-0.35288	0.048693	0.18715	0.733848	230	5	-0.35288
NonTargeting_Human_0498	1	0.39914	0.39926	0.999997	588	0	-0.13723	0.60086	0.60151	0.91906	1270	0	-0.13723
NonTargeting_Human_0612	1	0.39996	0.40005	0.999997	589	0	-0.17465	0.60004	0.60059	0.918453	1269	0	-0.17465
ZNF143	15	0.40151	0.69757	0.999997	590	4	0.25209	0.13609	0.38005	0.834878	435	7	0.25209
NonTargeting_Human_0615	1	0.40234	0.40241	0.999997	591	0	-0.12401	0.59766	0.59806	0.916188	1267	0	-0.12401
NonTargeting_Human_0768	1	0.40242	0.40247	0.999997	592	0	-0.16388	0.59758	0.59797	0.916188	1266	0	-0.16388
KLHL20	15	0.40256	0.69851	0.999997	593	2	0.19393	0.24799	0.54667	0.90302	677	6	0.19393
NonTargeting_Human_0795	1	0.40283	0.40279	0.999997	594	0	-0.16211	0.59717	0.59755	0.916188	1265	0	-0.16211
NonTargeting_Human_0595	1	0.40406	0.40387	0.999997	595	0	-0.10255	0.59594	0.59627	0.916188	1264	0	-0.10255
NonTargeting_Human_0786	1	0.40529	0.40519	0.999997	596	0	-0.19721	0.59471	0.5951	0.916107	1263	0	-0.19721
NonTargeting_Human_0334	1	0.40603	0.40601	0.999997	597	0	-0.12056	0.59397	0.59419	0.915872	1262	0	-0.12056
STARD4	15	0.40619	0.70147	0.999997	598	4	0.087547	0.61113	0.85035	0.999997	1282	4	0.087547
NonTargeting_Human_0927	1	0.40669	0.40671	0.999997	599	0	-0.13835	0.59331	0.59364	0.915833	1261	0	-0.13835
NonTargeting_Human_0408	1	0.40783	0.40798	0.999997	600	0	-0.17287	0.59217	0.59252	0.914912	1260	0	-0.17287
NonTargeting_Human_0878	1	0.40882	0.40895	0.999997	601	0	-0.1589	0.59118	0.5916	0.914286	1257	0	-0.1589
NonTargeting_Human_0277	1	0.40947	0.40966	0.999997	602	0	-0.089681	0.59053	0.59096	0.914114	1256	0	-0.089681
NonTargeting_Human_0580	1	0.4098	0.41	0.999997	603	0	-0.13601	0.5902	0.59068	0.914114	1255	0	-0.13601
NonTargeting_Human_0809	1	0.41103	0.41119	0.999997	604	0	-0.16755	0.58897	0.58938	0.913813	1254	0	-0.16755
NonTargeting_Human_0057	1	0.41128	0.4114	0.999997	605	0	-0.1296	0.58872	0.58911	0.913813	1253	0	-0.1296
FUNDC2	15	0.41238	0.70675	0.999997	606	3	0.27267	0.045419	0.17811	0.726	220	8	0.27267
NonTargeting_Human_0689	1	0.41276	0.41279	0.999997	607	0	-0.14805	0.58724	0.58768	0.913813	1252	0	-0.14805
NonTargeting_Human_0726	1	0.41374	0.41383	0.999997	608	0	-0.10975	0.58626	0.58672	0.913193	1251	0	-0.10975
NonTargeting_Human_0466	1	0.41382	0.41388	0.999997	609	0	-0.19645	0.58618	0.5866	0.913193	1250	0	-0.19645
NonTargeting_Human_0400	1	0.41423	0.41429	0.999997	610	0	-0.11305	0.58577	0.5862	0.913193	1249	0	-0.11305
NonTargeting_Human_0816	1	0.41448	0.41457	0.999997	611	0	-0.080178	0.58552	0.58593	0.913193	1248	0	-0.080178
NonTargeting_Human_0729	1	0.41514	0.41521	0.999997	612	0	-0.10228	0.58486	0.5852	0.913193	1247	0	-0.10228
NonTargeting_Human_0173	1	0.41596	0.41606	0.999997	613	0	-0.12634	0.58404	0.5844	0.913193	1246	0	-0.12634
NonTargeting_Human_0884	1	0.41776	0.41796	0.999997	614	0	-0.11616	0.58224	0.58268	0.913193	1244	0	-0.11616
NonTargeting_Human_0347	1	0.4185	0.41871	0.999997	615	0	-0.099484	0.5815	0.58193	0.913193	1243	0	-0.099484
NonTargeting_Human_0740	1	0.41866	0.41883	0.999997	616	0	-0.15971	0.58134	0.58176	0.913193	1242	0	-0.15971
NonTargeting_Human_0846	1	0.41907	0.41933	0.999997	617	0	-0.069199	0.58093	0.5814	0.913193	1241	0	-0.069199
MID1	15	0.41922	0.71255	0.999997	618	5	-0.017051	0.12783	0.36484	0.831058	410	7	-0.017051
NonTargeting_Human_0116	1	0.41932	0.41957	0.999997	619	0	-0.078198	0.58068	0.58111	0.913193	1240	0	-0.078198
NonTargeting_Human_0477	1	0.42047	0.42065	0.999997	620	0	-0.10788	0.57953	0.57998	0.913193	1239	0	-0.10788
ORMDL1	15	0.42204	0.7149	0.999997	621	5	0.056251	0.31831	0.62698	0.92966	826	6	0.056251
DNAJC4	15	0.42284	0.71553	0.999997	622	3	0.17532	0.00073534	0.0058156	0.236818	43	7	0.17532
WDR55	15	0.4229	0.71559	0.999997	623	5	-0.065201	0.19668	0.48368	0.881963	583	4	-0.065201
NonTargeting_Human_0958	1	0.42293	0.42297	0.999997	624	0	-0.055106	0.57707	0.57724	0.913193	1237	0	-0.055106
NonTargeting_Human_0931	1	0.42326	0.42325	0.999997	625	0	-0.094168	0.57674	0.57688	0.913193	1236	0	-0.094168
S100A10	15	0.42329	0.71596	0.999997	626	4	0.06272	0.20697	0.49674	0.881963	600	4	0.06272
NonTargeting_Human_0506	1	0.4235	0.42349	0.999997	627	0	-0.15404	0.5765	0.57667	0.913193	1235	0	-0.15404
NonTargeting_Human_0122	1	0.424	0.42399	0.999997	628	0	-0.054007	0.576	0.5761	0.913193	1234	0	-0.054007
SYTL3	15	0.42542	0.71765	0.999997	629	3	0.33194	0.01797	0.086935	0.699557	131	9	0.33194
SPINT1	15	0.42572	0.71791	0.999997	630	2	0.17273	0.21004	0.50058	0.881963	609	6	0.17273
NonTargeting_Human_0345	1	0.42621	0.42608	0.999997	631	0	-0.10615	0.57379	0.57393	0.911938	1232	0	-0.10615
NonTargeting_Human_0076	1	0.42629	0.42615	0.999997	632	0	-0.086201	0.57371	0.57385	0.911938	1231	0	-0.086201
GPN2	15	0.42755	0.71925	0.999997	633	4	-0.021731	0.26355	0.56496	0.909598	725	3	-0.021731
NonTargeting_Human_0693	1	0.42826	0.42802	0.999997	634	0	-0.084163	0.57174	0.57186	0.910293	1229	0	-0.084163
SPDYE2	15	0.42829	0.71989	0.999997	635	5	-0.028318	0.81564	0.93938	0.999997	1520	2	-0.028318
NonTargeting_Human_0886	1	0.42925	0.42899	0.999997	636	0	-0.13737	0.57075	0.5709	0.909598	1228	0	-0.13737
ISG15	15	0.43056	0.72175	0.999997	637	5	0.090998	0.30252	0.60943	0.92408	799	6	0.090998
NonTargeting_Human_0124	1	0.43187	0.43161	0.999997	638	0	-0.088711	0.56813	0.56825	0.909598	1226	0	-0.088711
NonTargeting_Human_0613	1	0.4322	0.43195	0.999997	639	0	-0.1408	0.5678	0.56792	0.909598	1224	0	-0.1408
DCAKD	15	0.43309	0.72398	0.999997	640	3	0.075606	0.28147	0.58573	0.913193	763	5	0.075606
NonTargeting_Human_0095	1	0.43335	0.4331	0.999997	641	0	-0.071796	0.56665	0.56677	0.909598	1223	0	-0.071796
NonTargeting_Human_0003	1	0.43343	0.43316	0.999997	642	0	-0.12736	0.56657	0.56665	0.909598	1222	0	-0.12736
ARHGEF35	15	0.43373	0.72451	0.999997	643	2	0.099877	0.026254	0.11876	0.704966	161	7	0.099877
NonTargeting_Human_0299	1	0.43441	0.43419	0.999997	644	0	-0.11948	0.56559	0.56565	0.909598	1219	0	-0.11948
NonTargeting_Human_0276	1	0.43548	0.43531	0.999997	645	0	-0.076928	0.56452	0.56464	0.909598	1218	0	-0.076928
NonTargeting_Human_0387	1	0.43597	0.43574	0.999997	646	0	-0.097185	0.56403	0.5641	0.909598	1217	0	-0.097185
KAT8	15	0.43658	0.72677	0.999997	647	5	-0.11257	0.7142	0.8977	0.999997	1411	3	-0.11257
NonTargeting_Human_0342	1	0.43934	0.4391	0.999997	648	0	-0.077703	0.56066	0.56042	0.908604	1213	0	-0.077703
KBTBD12	14	0.44064	0.72555	0.999997	649	3	0.48396	0.004915	0.02849	0.542241	69	9	0.48396
NonTargeting_Human_0969	1	0.44147	0.44117	0.999997	650	0	-0.086611	0.55853	0.55836	0.907788	1211	0	-0.086611
NonTargeting_Human_0920	1	0.44196	0.44165	0.999997	651	0	-0.087521	0.55804	0.55785	0.907788	1210	0	-0.087521
NonTargeting_Human_0788	1	0.44245	0.44219	0.999997	652	0	-0.074044	0.55755	0.55739	0.907788	1208	0	-0.074044
DPY30	15	0.44371	0.7324	0.999997	653	2	0.21779	0.074475	0.25655	0.77868	290	7	0.21779
hsa-mir-6515	13	0.44508	0.71826	0.999997	654	4	0.40033	0.059701	0.20997	0.750979	254	7	0.40033
ATP5F1	15	0.44532	0.73351	0.999997	655	5	0.064086	0.36649	0.67965	0.950831	927	4	0.064086
NonTargeting_Human_0622	1	0.44532	0.44516	0.999997	656	0	-0.0743	0.55468	0.55428	0.905363	1206	0	-0.0743
NonTargeting_Human_0971	1	0.44672	0.44659	0.999997	657	0	-0.075567	0.55328	0.55288	0.904129	1205	0	-0.075567
NonTargeting_Human_0162	1	0.44729	0.44712	0.999997	658	0	-0.073087	0.55271	0.55233	0.904129	1203	0	-0.073087
SCYL1	15	0.44844	0.73603	0.999997	659	5	0.077622	0.18478	0.46516	0.878413	553	6	0.077622
NonTargeting_Human_0967	1	0.44992	0.44966	0.999997	660	0	-0.08653	0.55008	0.54966	0.904129	1201	0	-0.08653
NonTargeting_Human_0811	1	0.45041	0.45009	0.999997	661	0	-0.089781	0.54959	0.54911	0.904129	1200	0	-0.089781
NonTargeting_Human_0167	1	0.45098	0.45063	0.999997	662	0	-0.066114	0.54902	0.54851	0.904129	1199	0	-0.066114
C2CD4A	15	0.45156	0.73865	0.999997	663	3	0.11883	0.26816	0.57036	0.909598	737	6	0.11883
EIF3F	15	0.45173	0.73875	0.999997	664	4	0.00028012	0.046056	0.17982	0.726	223	6	0.00028012
NonTargeting_Human_0465	1	0.4523	0.45203	0.999997	665	0	-0.062186	0.5477	0.54718	0.90302	1198	0	-0.062186
NonTargeting_Human_0459	1	0.45254	0.45226	0.999997	666	0	-0.063879	0.54746	0.54701	0.90302	1197	0	-0.063879
NonTargeting_Human_0019	1	0.45271	0.45246	0.999997	667	0	-0.051388	0.54729	0.54685	0.90302	1196	0	-0.051388
AMTN	15	0.45366	0.74022	0.999997	668	3	0.11825	0.3374	0.64792	0.938387	870	6	0.11825
NonTargeting_Human_0204	1	0.45394	0.45361	0.999997	669	0	-0.061733	0.54606	0.54571	0.90302	1195	0	-0.061733
NonTargeting_Human_0053	1	0.45484	0.45466	0.999997	670	0	-0.054802	0.54516	0.54462	0.90302	1194	0	-0.054802
NonTargeting_Human_0071	1	0.45574	0.45564	0.999997	671	0	-0.0503	0.54426	0.5436	0.902224	1191	0	-0.0503
NonTargeting_Human_0184	1	0.45615	0.45601	0.999997	672	0	-0.076978	0.54385	0.54316	0.902224	1190	0	-0.076978
NonTargeting_Human_0317	1	0.45664	0.45647	0.999997	673	0	-0.046072	0.54336	0.54269	0.902224	1189	0	-0.046072
NonTargeting_Human_0382	1	0.45788	0.45761	0.999997	674	0	-0.048777	0.54212	0.54143	0.901183	1188	0	-0.048777
NonTargeting_Human_0066	1	0.45812	0.45777	0.999997	675	0	-0.043815	0.54188	0.54118	0.901183	1187	0	-0.043815
NonTargeting_Human_0416	1	0.45853	0.45823	0.999997	676	0	-0.047138	0.54147	0.54079	0.901183	1185	0	-0.047138
SLC26A4	15	0.45944	0.74486	0.999997	677	4	-0.08664	0.1303	0.36966	0.831058	419	5	-0.08664
NonTargeting_Human_0154	1	0.46017	0.45996	0.999997	678	0	-0.060841	0.53983	0.53906	0.899806	1184	0	-0.060841
NonTargeting_Human_0584	1	0.46386	0.46389	0.999997	679	0	-0.024573	0.53614	0.53539	0.895378	1180	0	-0.024573
WDHD1	15	0.46441	0.74873	0.999997	680	2	0.47315	0.013207	0.067506	0.668507	102	9	0.47315
CEBPZ	14	0.46446	0.74599	0.999997	681	4	-0.30777	0.87564	0.95733	0.999997	1585	2	-0.30777
PPIAL4A	15	0.46612	0.74994	0.999997	682	3	0.048888	0.54508	0.81148	0.999997	1193	5	0.048888
NonTargeting_Human_0877	1	0.46665	0.46643	0.999997	683	0	-0.03895	0.53335	0.53263	0.893323	1179	0	-0.03895
SLC38A5	15	0.46713	0.75079	0.999997	684	4	-0.095551	0.97519	0.98982	0.999997	1674	1	-0.095551
TBX1	15	0.46749	0.75112	0.999997	685	5	0.24985	0.054444	0.20341	0.746243	245	8	0.24985
NonTargeting_Human_0480	1	0.46805	0.4678	0.999997	686	0	-0.025297	0.53195	0.53142	0.893004	1178	0	-0.025297
BRICD5	15	0.46836	0.75192	0.999997	687	4	0.087197	0.10446	0.32027	0.823061	353	6	0.087197
MCCC2	15	0.46912	0.75246	0.999997	688	5	-0.054841	0.90664	0.97055	0.999997	1617	3	-0.054841
NonTargeting_Human_0158	1	0.46952	0.46919	0.999997	689	0	-0.030331	0.53048	0.53008	0.891607	1175	0	-0.030331
CPSF2	15	0.47028	0.75335	0.999997	690	3	0.18251	0.21439	0.50608	0.881963	620	6	0.18251
C19orf57	15	0.47082	0.75371	0.999997	691	5	0.20748	0.057031	0.21065	0.750979	249	8	0.20748
NonTargeting_Human_0616	1	0.47199	0.47181	0.999997	692	0	-0.042764	0.52801	0.52744	0.888019	1173	0	-0.042764
WDR13	15	0.47223	0.75481	0.999997	693	5	-0.1716	0.99952	0.99956	0.999997	1731	0	-0.1716
NUDT21	15	0.47226	0.75484	0.999997	694	4	-0.045101	0.8341	0.94509	0.999997	1533	3	-0.045101
NonTargeting_Human_0912	1	0.47313	0.47294	0.999997	695	0	-0.032605	0.52687	0.52651	0.88732	1172	0	-0.032605
NonTargeting_Human_0412	1	0.47346	0.47323	0.999997	696	0	-0.022644	0.52654	0.52624	0.88732	1171	0	-0.022644
HTRA2	15	0.47364	0.75592	0.999997	697	3	0.056559	0.72608	0.90323	0.999997	1421	4	0.056559
NonTargeting_Human_0153	1	0.47395	0.47376	0.999997	698	0	-0.019956	0.52605	0.52577	0.88732	1170	0	-0.019956
NonTargeting_Human_0048	1	0.47445	0.47428	0.999997	699	0	-0.030948	0.52555	0.5253	0.88732	1169	0	-0.030948
NonTargeting_Human_0440	1	0.47461	0.47448	0.999997	700	0	-0.036837	0.52539	0.52515	0.88732	1168	0	-0.036837
HIST2H3A	15	0.47562	0.75757	0.999997	701	5	-0.13965	0.92063	0.97482	0.999997	1627	2	-0.13965
TAF10	15	0.47675	0.75832	0.999997	702	5	0.089804	0.62149	0.85521	0.999997	1295	4	0.089804
NonTargeting_Human_0108	1	0.47724	0.47705	0.999997	703	0	-0.022289	0.52276	0.5225	0.88732	1167	0	-0.022289
NUDT17	15	0.47832	0.75959	0.999997	704	1	0.03571	0.34088	0.65173	0.940517	878	5	0.03571
NonTargeting_Human_0040	1	0.47896	0.47869	0.999997	705	0	-0.024261	0.52104	0.52063	0.886798	1165	0	-0.024261
NonTargeting_Human_0780	1	0.47945	0.47919	0.999997	706	0	-0.029023	0.52055	0.5201	0.886746	1164	0	-0.029023
NonTargeting_Human_0586	1	0.47953	0.4793	0.999997	707	0	-0.018429	0.52047	0.52002	0.886746	1163	0	-0.018429
NonTargeting_Human_0298	1	0.48052	0.48021	0.999997	708	0	-0.023118	0.51948	0.51899	0.886583	1162	0	-0.023118
NonTargeting_Human_0794	1	0.48084	0.48048	0.999997	709	0	-0.023829	0.51916	0.51864	0.886583	1161	0	-0.023829
NonTargeting_Human_0859	1	0.48101	0.48062	0.999997	710	0	-0.018041	0.51899	0.51848	0.886583	1159	0	-0.018041
NonTargeting_Human_0083	1	0.48257	0.48224	0.999997	711	0	-0.013393	0.51743	0.51697	0.885727	1157	0	-0.013393
GSK3B	15	0.48352	0.76367	0.999997	712	5	0.13505	0.50151	0.78087	0.999997	1132	5	0.13505
FAM156A	15	0.48465	0.76454	0.999997	713	5	0.1623	0.024152	0.11066	0.70065	148	6	0.1623
NonTargeting_Human_0991	1	0.4847	0.48452	0.999997	714	0	-0.0086952	0.5153	0.51491	0.883065	1156	0	-0.0086952
NonTargeting_Human_0677	1	0.48519	0.48504	0.999997	715	0	-0.013534	0.51481	0.51436	0.882979	1155	0	-0.013534
METAP1	15	0.48519	0.765	0.999997	716	4	-0.044785	0.26301	0.5643	0.909598	722	1	-0.044785
IBA57	15	0.4858	0.76543	0.999997	717	4	0.21177	0.070716	0.24716	0.77868	283	7	0.21177
NonTargeting_Human_0202	1	0.4861	0.48588	0.999997	718	0	-0.010786	0.5139	0.51355	0.882835	1154	0	-0.010786
NonTargeting_Human_0645	1	0.48692	0.4867	0.999997	719	0	-0.0067913	0.51308	0.51274	0.882799	1153	0	-0.0067913
BAGE2	15	0.48775	0.76684	0.999997	720	5	0.032439	0.57924	0.83411	0.999997	1238	5	0.032439
NonTargeting_Human_0789	1	0.48798	0.48784	0.999997	721	0	-0.009475	0.51202	0.51175	0.881963	1151	0	-0.009475
NonTargeting_Human_0135	1	0.48806	0.48789	0.999997	722	0	-0.0078767	0.51194	0.51166	0.881963	1150	0	-0.0078767
NonTargeting_Human_0233	1	0.48823	0.48806	0.999997	723	0	-0.0068452	0.51177	0.51152	0.881963	1149	0	-0.0068452
NonTargeting_Human_0407	1	0.48831	0.48814	0.999997	724	0	-0.0084402	0.51169	0.51145	0.881963	1148	0	-0.0084402
NonTargeting_Human_0038	1	0.4888	0.48866	0.999997	725	0	-0.0067402	0.5112	0.51094	0.881963	1147	0	-0.0067402
NonTargeting_Human_0547	1	0.48897	0.48877	0.999997	726	0	-0.0072857	0.51103	0.51074	0.881963	1146	0	-0.0072857
NonTargeting_Human_0814	1	0.48905	0.48884	0.999997	727	0	-0.0068503	0.51095	0.51066	0.881963	1145	0	-0.0068503
NonTargeting_Human_0879	1	0.48938	0.48908	0.999997	728	0	-0.0055671	0.51062	0.51036	0.881963	1144	0	-0.0055671
NonTargeting_Human_0823	1	0.4897	0.4894	0.999997	729	0	-0.0047451	0.5103	0.51001	0.881963	1143	0	-0.0047451
NonTargeting_Human_0707	1	0.49094	0.49072	0.999997	730	0	-0.0028184	0.50906	0.50881	0.881963	1142	0	-0.0028184
NonTargeting_Human_0214	1	0.49208	0.49177	0.999997	731	0	-0.00048199	0.50792	0.5076	0.881963	1139	0	-0.00048199
TFAM	15	0.49253	0.7708	0.999997	732	5	-0.17479	0.46682	0.75593	0.996716	1078	5	-0.17479
RPS8	15	0.49288	0.77101	0.999997	733	2	0.65464	0.011063	0.059369	0.657551	92	8	0.65464
PDE1A	15	0.49338	0.77143	0.999997	734	5	-0.16678	0.64334	0.86536	0.999997	1326	3	-0.16678
NonTargeting_Human_0315	1	0.49438	0.49406	0.999997	735	0	0.0029608	0.50562	0.50532	0.881963	1138	0	0.0029608
NonTargeting_Human_0631	1	0.49463	0.49437	0.999997	736	0	0.0029093	0.50537	0.50501	0.881963	1137	0	0.0029093
NonTargeting_Human_0587	1	0.49528	0.495	0.999997	737	0	0.0025563	0.50472	0.50431	0.881963	1136	0	0.0025563
ATP5O	15	0.49534	0.77304	0.999997	738	5	-0.040617	0.7509	0.91483	0.999997	1445	3	-0.040617
MYOZ3	15	0.49663	0.77391	0.999997	739	3	-0.15141	0.82344	0.94178	0.999997	1524	3	-0.15141
SOCS1	15	0.49747	0.77454	0.999997	740	3	0.02618	0.31705	0.62574	0.92966	824	6	0.02618
NonTargeting_Human_0372	1	0.49807	0.49774	0.999997	741	0	0.0072927	0.50193	0.50175	0.881963	1134	0	0.0072927
NonTargeting_Human_0804	1	0.49824	0.49785	0.999997	742	0	0.0087294	0.50176	0.50154	0.881963	1133	0	0.0087294
S100A14	15	0.49827	0.77527	0.999997	743	4	0.095261	0.26687	0.56887	0.909598	734	5	0.095261
LSM7	15	0.49843	0.77533	0.999997	744	5	-0.20719	0.67099	0.87795	0.999997	1369	4	-0.20719
NonTargeting_Human_0294	1	0.49881	0.4985	0.999997	745	0	0.011023	0.50119	0.501	0.881963	1130	0	0.011023
SYS1	15	0.49899	0.77572	0.999997	746	5	-0.25718	0.83812	0.9462	0.999997	1542	2	-0.25718
CIAPIN1	15	0.50123	0.77731	0.999997	747	5	0.14714	0.019405	0.092702	0.70065	133	5	0.14714
NonTargeting_Human_0251	1	0.50406	0.50374	0.999997	748	0	0.01148	0.49594	0.4957	0.881963	1128	0	0.01148
NonTargeting_Human_0074	1	0.50463	0.50423	0.999997	749	0	0.016462	0.49537	0.4951	0.881963	1127	0	0.016462
NonTargeting_Human_0718	1	0.50521	0.50487	0.999997	750	0	0.018411	0.49479	0.49453	0.881963	1126	0	0.018411
NonTargeting_Human_0731	1	0.50537	0.50501	0.999997	751	0	0.022004	0.49463	0.49437	0.881963	1125	0	0.022004
NonTargeting_Human_0874	1	0.50554	0.50522	0.999997	752	0	0.019463	0.49446	0.49418	0.881963	1124	0	0.019463
NonTargeting_Human_0691	1	0.50562	0.50532	0.999997	753	0	0.016391	0.49438	0.49406	0.881963	1123	0	0.016391
ANKRD35	15	0.50584	0.78098	0.999997	754	4	-0.054508	0.43854	0.73563	0.986487	1037	5	-0.054508
NonTargeting_Human_0999	1	0.50611	0.50577	0.999997	755	0	0.019609	0.49389	0.49359	0.881963	1122	0	0.019609
NonTargeting_Human_0283	1	0.50685	0.50651	0.999997	756	0	0.014512	0.49315	0.49281	0.881963	1121	0	0.014512
NonTargeting_Human_0396	1	0.50701	0.50664	0.999997	757	0	0.014326	0.49299	0.49272	0.881963	1120	0	0.014326
ACTR6	15	0.50705	0.78184	0.999997	758	3	-0.12371	0.45085	0.74451	0.991051	1056	3	-0.12371
NonTargeting_Human_0385	1	0.50792	0.5076	0.999997	759	0	0.0242	0.49208	0.49177	0.881963	1118	0	0.0242
NonTargeting_Human_0052	1	0.50882	0.50854	0.999997	760	0	0.022459	0.49118	0.49092	0.881963	1117	0	0.022459
NonTargeting_Human_0420	1	0.50956	0.50927	0.999997	761	0	0.031215	0.49044	0.49016	0.881963	1116	0	0.031215
NonTargeting_Human_0010	1	0.50989	0.50958	0.999997	762	0	0.021778	0.49011	0.48975	0.881963	1115	0	0.021778
NonTargeting_Human_0753	1	0.5103	0.51001	0.999997	763	0	0.029056	0.4897	0.4894	0.881963	1114	0	0.029056
PON1	15	0.51039	0.78422	0.999997	764	4	-0.1779	0.016999	0.082903	0.698662	125	6	-0.1779
YME1L1	15	0.51103	0.78473	0.999997	765	5	-0.19434	0.9967	0.9966	0.999997	1709	1	-0.19434
NonTargeting_Human_0349	1	0.5121	0.5118	0.999997	766	0	0.027137	0.4879	0.48777	0.881963	1113	0	0.027137
NonTargeting_Human_0570	1	0.51243	0.5121	0.999997	767	0	0.030021	0.48757	0.48747	0.881963	1111	0	0.030021
NonTargeting_Human_0605	1	0.51251	0.51217	0.999997	768	0	0.030414	0.48749	0.4874	0.881963	1110	0	0.030414
NonTargeting_Human_0549	1	0.51259	0.51222	0.999997	769	0	0.038361	0.48741	0.48728	0.881963	1109	0	0.038361
NonTargeting_Human_0571	1	0.51267	0.51232	0.999997	770	0	0.039956	0.48733	0.48715	0.881963	1108	0	0.039956
NonTargeting_Human_0296	1	0.51349	0.51317	0.999997	771	0	0.026032	0.48651	0.48625	0.881963	1105	0	0.026032
PRDM8	15	0.5141	0.7871	0.999997	772	5	-0.028371	0.8111	0.93799	0.999997	1514	3	-0.028371
NonTargeting_Human_0322	1	0.51432	0.51397	0.999997	773	0	0.033941	0.48568	0.4855	0.881963	1104	0	0.033941
NonTargeting_Human_0448	1	0.51497	0.51455	0.999997	774	0	0.031688	0.48503	0.48489	0.881963	1102	0	0.031688
BID	15	0.51577	0.78832	0.999997	775	5	0.10727	0.39003	0.69847	0.96429	968	5	0.10727
NonTargeting_Human_0336	1	0.51604	0.51562	0.999997	776	0	0.052749	0.48396	0.48365	0.881963	1100	0	0.052749
NonTargeting_Human_0836	1	0.51661	0.5162	0.999997	777	0	0.055976	0.48339	0.48304	0.881963	1099	0	0.055976
NonTargeting_Human_0934	1	0.51874	0.51829	0.999997	778	0	0.049823	0.48126	0.48085	0.881963	1097	0	0.049823
RALB	15	0.52018	0.79165	0.999997	779	4	0.09495	0.11094	0.33291	0.825315	371	4	0.09495
NonTargeting_Human_0630	1	0.52121	0.52081	0.999997	780	0	0.035452	0.47879	0.47856	0.881963	1094	0	0.035452
NonTargeting_Human_0199	1	0.52203	0.52175	0.999997	781	0	0.050446	0.47797	0.47776	0.881963	1093	0	0.050446
NonTargeting_Human_0647	1	0.52227	0.52198	0.999997	782	0	0.048131	0.47773	0.47753	0.881963	1092	0	0.048131
NonTargeting_Human_0815	1	0.52268	0.52242	0.999997	783	0	0.062224	0.47732	0.47713	0.881963	1090	0	0.062224
NELFB	15	0.52333	0.79398	0.999997	784	2	-0.0082365	0.36633	0.67945	0.950831	925	5	-0.0082365
NonTargeting_Human_0051	1	0.52334	0.52313	0.999997	785	0	0.042466	0.47666	0.47653	0.881963	1089	0	0.042466
NonTargeting_Human_0964	1	0.52424	0.52413	0.999997	786	0	0.073587	0.47576	0.47552	0.881963	1087	0	0.073587
NonTargeting_Human_0102	1	0.52523	0.52502	0.999997	787	0	0.043012	0.47477	0.47463	0.881963	1086	0	0.043012
NonTargeting_Human_0567	1	0.52736	0.52692	0.999997	788	0	0.04308	0.47264	0.47251	0.881963	1084	0	0.04308
NonTargeting_Human_0445	1	0.52892	0.52836	0.999997	789	0	0.069218	0.47108	0.47091	0.88094	1083	0	0.069218
COPS6	15	0.52922	0.79852	0.999997	790	4	-0.13085	0.65024	0.86865	0.999997	1338	3	-0.13085
IREB2	15	0.53006	0.7991	0.999997	791	3	0.49961	0.00093062	0.0070031	0.266573	46	10	0.49961
NonTargeting_Human_0014	1	0.53007	0.5296	0.999997	792	0	0.054908	0.46993	0.46966	0.880124	1082	0	0.054908
FDX1L	15	0.53021	0.79923	0.999997	793	5	0.071085	0.15542	0.41513	0.850984	482	4	0.071085
HIST1H2BB	15	0.5316	0.80048	0.999997	794	2	0.25606	0.057894	0.21291	0.75465	251	8	0.25606
NonTargeting_Human_0898	1	0.53179	0.53125	0.999997	795	0	0.076534	0.46821	0.46796	0.878413	1081	0	0.076534
RNF112	15	0.53214	0.80087	0.999997	796	5	0.25648	0.029859	0.13145	0.719291	171	8	0.25648
SHC1	15	0.53219	0.8009	0.999997	797	4	-0.15541	0.65483	0.87052	0.999997	1342	3	-0.15541
NonTargeting_Human_0404	1	0.53269	0.53204	0.999997	798	0	0.064765	0.46731	0.46704	0.878413	1080	0	0.064765
NonTargeting_Human_0759	1	0.53285	0.5322	0.999997	799	0	0.043015	0.46715	0.46693	0.878413	1079	0	0.043015
PGA3	15	0.5331	0.80159	0.999997	800	3	0.21067	0.054685	0.20414	0.746243	247	7	0.21067
NonTargeting_Human_0625	1	0.53441	0.53367	0.999997	801	0	0.079553	0.46559	0.46551	0.878413	1077	0	0.079553
NonTargeting_Human_0531	1	0.5363	0.53558	0.999997	802	0	0.067469	0.4637	0.4637	0.877779	1076	0	0.067469
NonTargeting_Human_0130	1	0.53778	0.53699	0.999997	803	0	0.077412	0.46222	0.4621	0.876645	1075	0	0.077412
MORC3	15	0.53783	0.80422	0.999997	804	4	0.030599	0.043985	0.17418	0.726	213	5	0.030599
NonTargeting_Human_0327	1	0.53786	0.53709	0.999997	805	0	0.061591	0.46214	0.46197	0.876645	1074	0	0.061591
NonTargeting_Human_0065	1	0.53802	0.53725	0.999997	806	0	0.048858	0.46198	0.46182	0.876645	1072	0	0.048858
NonTargeting_Human_0348	1	0.53917	0.53835	0.999997	807	0	0.063371	0.46083	0.46049	0.876645	1071	0	0.063371
GOLGA6A	15	0.5393	0.80492	0.999997	808	4	0.045197	0.14064	0.3884	0.838737	443	5	0.045197
NonTargeting_Human_0194	1	0.54081	0.54019	0.999997	809	0	0.076086	0.45919	0.45888	0.876513	1068	0	0.076086
NonTargeting_Human_0479	1	0.54237	0.54167	0.999997	810	0	0.097131	0.45763	0.45741	0.876043	1065	0	0.097131
NonTargeting_Human_0535	1	0.54319	0.54254	0.999997	811	0	0.091905	0.45681	0.45663	0.87575	1064	0	0.091905
NonTargeting_Human_0632	1	0.54409	0.54345	0.999997	812	0	0.082437	0.45591	0.45577	0.87506	1062	0	0.082437
DNAL4	15	0.54549	0.80807	0.999997	813	4	0.13165	0.31327	0.62163	0.928737	817	6	0.13165
NonTargeting_Human_0933	1	0.54696	0.5465	0.999997	814	0	0.05525	0.45304	0.45279	0.870282	1060	0	0.05525
NonTargeting_Human_0128	1	0.54729	0.54685	0.999997	815	0	0.072054	0.45271	0.45246	0.870282	1059	0	0.072054
NonTargeting_Human_0620	1	0.54787	0.54733	0.999997	816	0	0.18607	0.45213	0.4519	0.870282	1058	0	0.18607
NonTargeting_Human_0695	1	0.54861	0.54811	0.999997	817	0	0.078032	0.45139	0.45113	0.870282	1057	0	0.078032
PIGQ	15	0.54902	0.80971	0.999997	818	4	-0.10602	0.55189	0.81588	0.999997	1202	3	-0.10602
NonTargeting_Human_0681	1	0.54918	0.54869	0.999997	819	0	0.15202	0.45082	0.45043	0.870282	1055	0	0.15202
NonTargeting_Human_0637	1	0.54926	0.54878	0.999997	820	0	0.0602	0.45074	0.45035	0.870282	1054	0	0.0602
NonTargeting_Human_0267	1	0.54934	0.54887	0.999997	821	0	0.064289	0.45066	0.45027	0.870282	1053	0	0.064289
NonTargeting_Human_0783	1	0.54943	0.54892	0.999997	822	0	0.17781	0.45057	0.45023	0.870282	1052	0	0.17781
NonTargeting_Human_0001	1	0.55016	0.54972	0.999997	823	0	0.078062	0.44984	0.44957	0.870282	1050	0	0.078062
NonTargeting_Human_0389	1	0.55025	0.54979	0.999997	824	0	0.11093	0.44975	0.44949	0.870282	1049	0	0.11093
MED1	15	0.55149	0.81095	0.999997	825	2	0.2152	0.32642	0.63615	0.934817	844	6	0.2152
NonTargeting_Human_0723	1	0.55271	0.55233	0.999997	826	0	0.10904	0.44729	0.44712	0.869895	1048	0	0.10904
CLK2	15	0.55323	0.81188	0.999997	827	2	-0.032461	0.35085	0.66281	0.945867	899	5	-0.032461
NSFL1C	15	0.55341	0.81196	0.999997	828	4	-0.14926	0.7452	0.91204	0.999997	1441	4	-0.14926
NonTargeting_Human_0242	1	0.55377	0.55332	0.999997	829	0	0.064654	0.44623	0.44606	0.86976	1047	0	0.064654
NonTargeting_Human_0538	1	0.55402	0.55357	0.999997	830	0	0.26608	0.44598	0.4458	0.86976	1046	0	0.26608
NonTargeting_Human_0683	1	0.55468	0.55428	0.999997	831	0	0.11514	0.44532	0.44516	0.86976	1045	0	0.11514
NonTargeting_Human_0468	1	0.55574	0.55546	0.999997	832	0	0.075839	0.44426	0.44412	0.868881	1044	0	0.075839
SIN3B	15	0.55612	0.81325	0.999997	833	2	0.16649	0.022508	0.10451	0.70065	142	6	0.16649
NonTargeting_Human_0042	1	0.55615	0.55595	0.999997	834	0	0.099057	0.44385	0.44364	0.868881	1043	0	0.099057
METTL17	15	0.55691	0.81363	0.999997	835	4	0.27823	0.20742	0.4973	0.881963	601	6	0.27823
NonTargeting_Human_0203	1	0.55714	0.55696	0.999997	836	0	0.059951	0.44286	0.44273	0.8681	1042	0	0.059951
NonTargeting_Human_0576	1	0.55771	0.5575	0.999997	837	0	0.22506	0.44229	0.44201	0.867685	1041	0	0.22506
NonTargeting_Human_0643	1	0.55845	0.55829	0.999997	838	0	0.18559	0.44155	0.44121	0.867685	1040	0	0.18559
MARS2	15	0.55957	0.81487	0.999997	839	4	-0.063087	0.8105	0.93785	0.999997	1513	2	-0.063087
NonTargeting_Human_0359	1	0.55984	0.55965	0.999997	840	0	0.12745	0.44016	0.43984	0.867301	1038	0	0.12745
ATP6V1B1	15	0.56014	0.81512	0.999997	841	2	0.33745	0.10461	0.32053	0.823061	354	7	0.33745
ZFR	15	0.56098	0.81555	0.999997	842	4	0.19174	0.25326	0.55301	0.904129	690	5	0.19174
TMEM253	15	0.56128	0.81566	0.999997	843	2	0.589	0.00067983	0.0053972	0.236262	40	8	0.589
NonTargeting_Human_0654	1	0.56181	0.56172	0.999997	844	0	0.081404	0.43819	0.43796	0.864562	1036	0	0.081404
NonTargeting_Human_0679	1	0.56214	0.56212	0.999997	845	0	0.095601	0.43786	0.43765	0.864562	1035	0	0.095601
NonTargeting_Human_0577	1	0.56231	0.56228	0.999997	846	0	0.1206	0.43769	0.43754	0.864562	1034	0	0.1206
SSH3	15	0.56396	0.81705	0.999997	847	4	0.0091507	0.19378	0.47963	0.881963	574	5	0.0091507
NonTargeting_Human_0968	1	0.56403	0.5641	0.999997	848	0	0.08785	0.43597	0.43574	0.863105	1033	0	0.08785
NARF	15	0.56446	0.8173	0.999997	849	4	-0.092759	0.088505	0.28874	0.7989	310	5	-0.092759
NonTargeting_Human_0562	1	0.56501	0.56513	0.999997	850	0	0.17347	0.43499	0.43479	0.862199	1032	0	0.17347
NonTargeting_Human_0666	1	0.56674	0.56685	0.999997	851	0	0.11359	0.43326	0.43303	0.86065	1031	0	0.11359
NonTargeting_Human_0978	1	0.56715	0.56722	0.999997	852	0	0.24504	0.43285	0.43258	0.86065	1030	0	0.24504
NonTargeting_Human_0106	1	0.56854	0.56863	0.999997	853	0	0.077477	0.43146	0.43123	0.86065	1028	0	0.077477
CTRL	15	0.56879	0.8194	0.999997	854	4	0.10451	0.11907	0.34838	0.825315	392	5	0.10451
NonTargeting_Human_0213	1	0.57018	0.57032	0.999997	855	0	0.078284	0.42982	0.42956	0.860113	1027	0	0.078284
NonTargeting_Human_0636	1	0.57256	0.57271	0.999997	856	0	0.20396	0.42744	0.42731	0.858042	1024	0	0.20396
NonTargeting_Human_0863	1	0.57305	0.57324	0.999997	857	0	0.11183	0.42695	0.42679	0.857993	1023	0	0.11183
NonTargeting_Human_0544	1	0.57428	0.57445	0.999997	858	0	0.11286	0.42572	0.42557	0.856521	1022	0	0.11286
NonTargeting_Human_0143	1	0.57461	0.57474	0.999997	859	0	0.27534	0.42539	0.42529	0.856521	1021	0	0.27534
NonTargeting_Human_0088	1	0.5751	0.57525	0.999997	860	0	0.091401	0.4249	0.42487	0.856521	1020	0	0.091401
POLR2C	15	0.57545	0.82289	0.999997	861	3	0.042696	0.66869	0.87705	0.999997	1366	3	0.042696
NonTargeting_Human_0469	1	0.57592	0.57603	0.999997	862	0	0.077873	0.42408	0.42405	0.856413	1018	0	0.077873
NonTargeting_Human_0394	1	0.5765	0.57667	0.999997	863	0	0.095339	0.4235	0.42349	0.856413	1017	0	0.095339
NonTargeting_Human_0022	1	0.57683	0.57698	0.999997	864	0	0.11694	0.42317	0.4232	0.856413	1016	0	0.11694
SPDYE1	15	0.57698	0.82362	0.999997	865	3	0.045371	0.75775	0.91815	0.999997	1453	4	0.045371
MRPL42	15	0.57923	0.82489	0.999997	866	4	0.19129	0.23057	0.52584	0.88732	651	6	0.19129
NonTargeting_Human_0380	1	0.57986	0.58033	0.999997	867	0	0.25692	0.42014	0.42033	0.852845	1014	0	0.25692
ST6GAL1	15	0.58029	0.82544	0.999997	868	3	0.20989	0.042357	0.16934	0.726	207	7	0.20989
NonTargeting_Human_0159	1	0.58101	0.58148	0.999997	869	0	0.2134	0.41899	0.4192	0.851537	1012	0	0.2134
NonTargeting_Human_0671	1	0.58134	0.58176	0.999997	870	0	0.14582	0.41866	0.41883	0.851537	1011	0	0.14582
NonTargeting_Human_0208	1	0.58224	0.58268	0.999997	871	0	0.14741	0.41776	0.41796	0.850984	1010	0	0.14741
NonTargeting_Human_0558	1	0.58232	0.58276	0.999997	872	0	0.11413	0.41768	0.41785	0.850984	1009	0	0.11413
NonTargeting_Human_0169	1	0.5824	0.58287	0.999997	873	0	0.22982	0.4176	0.41773	0.850984	1008	0	0.22982
NonTargeting_Human_0127	1	0.58298	0.58341	0.999997	874	0	0.11709	0.41702	0.41713	0.850984	1007	0	0.11709
STOML3	15	0.58344	0.82702	0.999997	875	3	0.26664	0.12434	0.35868	0.829649	405	7	0.26664
HSD17B10	15	0.58382	0.82728	0.999997	876	3	0.00043611	0.99456	0.99528	0.999997	1702	1	0.00043611
NonTargeting_Human_0365	1	0.58404	0.5844	0.999997	877	0	0.13138	0.41596	0.41606	0.850984	1006	0	0.13138
NonTargeting_Human_0919	1	0.58445	0.58481	0.999997	878	0	0.13817	0.41555	0.41562	0.850984	1005	0	0.13817
NonTargeting_Human_0597	1	0.58462	0.58497	0.999997	879	0	0.11442	0.41538	0.41547	0.850984	1004	0	0.11442
NonTargeting_Human_0148	1	0.58651	0.58698	0.999997	880	0	0.11804	0.41349	0.41362	0.850062	1003	0	0.11804
NonTargeting_Human_0402	1	0.587	0.58744	0.999997	881	0	0.1419	0.413	0.41312	0.850037	1001	0	0.1419
NonTargeting_Human_0089	1	0.58741	0.58784	0.999997	882	0	0.095362	0.41259	0.41266	0.850037	1000	0	0.095362
NonTargeting_Human_0329	1	0.58782	0.58824	0.999997	883	0	0.14634	0.41218	0.41215	0.850022	999	0	0.14634
NonTargeting_Human_0712	1	0.5879	0.58829	0.999997	884	0	0.10762	0.4121	0.41208	0.850022	998	0	0.10762
NonTargeting_Human_0424	1	0.58872	0.58911	0.999997	885	0	0.18431	0.41128	0.4114	0.850022	996	0	0.18431
NonTargeting_Human_0005	1	0.59036	0.59078	0.999997	886	0	0.099036	0.40964	0.40982	0.84923	995	0	0.099036
NonTargeting_Human_0221	1	0.59053	0.59096	0.999997	887	0	0.23364	0.40947	0.40966	0.84923	994	0	0.23364
UBA3	15	0.59056	0.83104	0.999997	888	2	0.59835	0.020182	0.095869	0.70065	138	9	0.59835
NonTargeting_Human_0310	1	0.59151	0.59187	0.999997	889	0	0.18605	0.40849	0.40858	0.84923	993	0	0.18605
NonTargeting_Human_0734	1	0.59225	0.59264	0.999997	890	0	0.1442	0.40775	0.40792	0.84923	992	0	0.1442
NonTargeting_Human_0724	1	0.59471	0.5951	0.999997	891	0	0.26648	0.40529	0.40519	0.847647	990	0	0.26648
NonTargeting_Human_0458	1	0.59487	0.59526	0.999997	892	0	0.1523	0.40513	0.40503	0.847647	989	0	0.1523
NonTargeting_Human_0352	1	0.59586	0.59616	0.999997	893	0	0.13071	0.40414	0.40394	0.847531	988	0	0.13071
NonTargeting_Human_0293	1	0.59627	0.59661	0.999997	894	0	0.15112	0.40373	0.40363	0.847531	987	0	0.15112
NonTargeting_Human_0685	1	0.59668	0.59705	0.999997	895	0	0.34868	0.40332	0.40326	0.847531	986	0	0.34868
NonTargeting_Human_0672	1	0.59856	0.59892	0.999997	896	0	0.15579	0.40144	0.40148	0.846982	984	0	0.15579
TREM1	15	0.59931	0.83577	0.999997	897	2	0.52174	0.012129	0.063542	0.658096	98	9	0.52174
NonTargeting_Human_0742	1	0.60004	0.60059	0.999997	898	0	0.15257	0.39996	0.40005	0.84497	983	0	0.15257
NonTargeting_Human_0847	1	0.6016	0.60225	0.999997	899	0	0.14591	0.3984	0.39869	0.843121	982	0	0.14591
NonTargeting_Human_0443	1	0.60201	0.60264	0.999997	900	0	0.19595	0.39799	0.39821	0.843121	981	0	0.19595
NonTargeting_Human_0092	1	0.60242	0.60305	0.999997	901	0	0.21212	0.39758	0.39779	0.843121	980	0	0.21212
NonTargeting_Human_0388	1	0.60291	0.60362	0.999997	902	0	0.12268	0.39709	0.39725	0.843121	979	0	0.12268
NonTargeting_Human_0444	1	0.60414	0.60485	0.999997	903	0	0.12547	0.39586	0.39604	0.84159	977	0	0.12547
ABHD14B	15	0.60528	0.83891	0.999997	904	1	0.45765	0.006417	0.037922	0.597463	74	10	0.45765
FAM126A	15	0.6055	0.83903	0.999997	905	3	-0.0047249	0.11224	0.33543	0.825315	374	7	-0.0047249
NonTargeting_Human_0200	1	0.60603	0.60674	0.999997	906	0	0.15145	0.39397	0.3943	0.839916	975	0	0.15145
NonTargeting_Human_0150	1	0.60718	0.60781	0.999997	907	0	0.1261	0.39282	0.39318	0.839586	973	0	0.1261
NCAPG2	15	0.60726	0.84	0.999997	908	4	-0.085476	0.64162	0.86453	0.999997	1324	4	-0.085476
NonTargeting_Human_0487	1	0.60742	0.60806	0.999997	909	0	0.15503	0.39258	0.39297	0.839586	972	0	0.15503
NonTargeting_Human_0564	1	0.60751	0.60818	0.999997	910	0	0.13495	0.39249	0.39289	0.839586	971	0	0.13495
NonTargeting_Human_0273	1	0.60865	0.60933	0.999997	911	0	0.16566	0.39135	0.3917	0.839586	970	0	0.16566
NonTargeting_Human_0100	1	0.6089	0.60966	0.999997	912	0	0.19043	0.3911	0.39144	0.839586	969	0	0.19043
NonTargeting_Human_0955	1	0.61005	0.61081	0.999997	913	0	0.23101	0.38995	0.39026	0.839486	967	0	0.23101
NonTargeting_Human_0565	1	0.61087	0.61146	0.999997	914	0	0.1211	0.38913	0.38952	0.838935	966	0	0.1211
NonTargeting_Human_0197	1	0.61161	0.61218	0.999997	915	0	0.19432	0.38839	0.38877	0.838737	965	0	0.19432
NonTargeting_Human_0436	1	0.61292	0.61355	0.999997	916	0	0.20727	0.38708	0.38745	0.838604	964	0	0.20727
NonTargeting_Human_0435	1	0.61505	0.61573	0.999997	917	0	0.2139	0.38495	0.38523	0.835861	962	0	0.2139
TRAPPC1	15	0.61525	0.84407	0.999997	918	4	-0.032591	0.94449	0.97992	0.999997	1646	2	-0.032591
NonTargeting_Human_0987	1	0.61555	0.61631	0.999997	919	0	0.26551	0.38445	0.38473	0.835817	961	0	0.26551
NonTargeting_Human_0659	1	0.61604	0.61686	0.999997	920	0	0.19954	0.38396	0.38427	0.835817	960	0	0.19954
NonTargeting_Human_0403	1	0.61661	0.61743	0.999997	921	0	0.19982	0.38339	0.3837	0.835655	959	0	0.19982
NonTargeting_Human_0262	1	0.61669	0.6175	0.999997	922	0	0.12505	0.38331	0.38362	0.835655	958	0	0.12505
NonTargeting_Human_0188	1	0.61678	0.61756	0.999997	923	0	0.23823	0.38322	0.38353	0.835655	957	0	0.23823
NonTargeting_Human_0291	1	0.61686	0.61764	0.999997	924	0	0.1536	0.38314	0.38343	0.835655	956	0	0.1536
NonTargeting_Human_0658	1	0.61792	0.61866	0.999997	925	0	0.23098	0.38208	0.3824	0.835655	955	0	0.23098
NonTargeting_Human_0047	1	0.61833	0.619	0.999997	926	0	0.17542	0.38167	0.38199	0.835655	954	0	0.17542
NOMO1	15	0.61908	0.84601	0.999997	927	4	0.01941	0.35444	0.66666	0.947501	905	6	0.01941
NonTargeting_Human_0970	1	0.62063	0.62122	0.999997	928	0	0.39134	0.37937	0.37948	0.834762	953	0	0.39134
NonTargeting_Human_0326	1	0.6208	0.62143	0.999997	929	0	0.15688	0.3792	0.37929	0.834762	951	0	0.15688
FAM21A	15	0.62099	0.84704	0.999997	930	4	0.16523	0.34203	0.65287	0.940517	881	6	0.16523
NonTargeting_Human_0492	1	0.62162	0.62238	0.999997	931	0	0.16044	0.37838	0.37839	0.834458	950	0	0.16044
WNT3A	15	0.62199	0.84754	0.999997	932	1	0.47633	0.0029013	0.018623	0.481059	56	9	0.47633
NonTargeting_Human_0500	1	0.6226	0.6233	0.999997	933	0	0.28213	0.3774	0.37743	0.833387	949	0	0.28213
STAM2	15	0.62276	0.84798	0.999997	934	4	0.10796	0.79256	0.93261	0.999997	1501	3	0.10796
NonTargeting_Human_0773	1	0.62285	0.62351	0.999997	935	0	0.28359	0.37715	0.37721	0.833387	948	0	0.28359
OLR1	15	0.62299	0.84804	0.999997	936	4	0.038627	0.2667	0.56868	0.909598	733	5	0.038627
NonTargeting_Human_0764	1	0.62301	0.62371	0.999997	937	0	0.11467	0.37699	0.37702	0.833387	947	0	0.11467
NonTargeting_Human_0096	1	0.62465	0.62548	0.999997	938	0	0.26394	0.37535	0.37536	0.833387	946	0	0.26394
NonTargeting_Human_0399	1	0.62498	0.62581	0.999997	939	0	0.16954	0.37502	0.37506	0.833387	945	0	0.16954
NonTargeting_Human_0838	1	0.62514	0.62597	0.999997	940	0	0.24029	0.37486	0.37491	0.833387	944	0	0.24029
DGKK	15	0.62724	0.85022	0.999997	941	4	-0.18181	0.88938	0.9642	0.999997	1599	3	-0.18181
NonTargeting_Human_0566	1	0.62785	0.62885	0.999997	942	0	0.17653	0.37215	0.3721	0.831058	942	0	0.17653
NonTargeting_Human_0499	1	0.62793	0.62894	0.999997	943	0	0.17667	0.37207	0.37205	0.831058	941	0	0.17667
NonTargeting_Human_0853	1	0.62851	0.62948	0.999997	944	0	0.20398	0.37149	0.37139	0.831058	939	0	0.20398
NonTargeting_Human_0054	1	0.62966	0.63073	0.999997	945	0	0.15639	0.37034	0.37023	0.831058	938	0	0.15639
NonTargeting_Human_0717	1	0.63064	0.63185	0.999997	946	0	0.17522	0.36936	0.36935	0.831058	937	0	0.17522
NonTargeting_Human_0922	1	0.6313	0.63252	0.999997	947	0	0.25258	0.3687	0.36869	0.831058	936	0	0.25258
NonTargeting_Human_0601	1	0.63162	0.6328	0.999997	948	0	0.22128	0.36838	0.36834	0.831058	935	0	0.22128
SLC35A2	15	0.63171	0.85261	0.999997	949	4	0.026557	0.6302	0.85907	0.999997	1308	4	0.026557
NonTargeting_Human_0657	1	0.63187	0.63302	0.999997	950	0	0.18759	0.36813	0.36812	0.831058	934	0	0.18759
NonTargeting_Human_0110	1	0.63195	0.63311	0.999997	951	0	0.18301	0.36805	0.36804	0.831058	933	0	0.18301
NonTargeting_Human_0762	1	0.63236	0.63365	0.999997	952	0	0.17273	0.36764	0.36758	0.831058	932	0	0.17273
NonTargeting_Human_0962	1	0.63244	0.6337	0.999997	953	0	0.21543	0.36756	0.36749	0.831058	931	0	0.21543
NonTargeting_Human_0930	1	0.63335	0.63462	0.999997	954	0	0.13385	0.36665	0.36654	0.831058	928	0	0.13385
NonTargeting_Human_0642	1	0.63351	0.63476	0.999997	955	0	0.21712	0.36649	0.36642	0.831058	926	0	0.21712
KIF3C	15	0.63613	0.85495	0.999997	956	3	0.29922	0.060975	0.22128	0.772189	257	8	0.29922
NonTargeting_Human_0536	1	0.63646	0.63759	0.999997	957	0	0.15935	0.36354	0.36341	0.831058	922	0	0.15935
ZFP3	15	0.63653	0.85519	0.999997	958	4	0.046728	0.21765	0.50996	0.881963	625	5	0.046728
NonTargeting_Human_0308	1	0.63728	0.63852	0.999997	959	0	0.20426	0.36272	0.36251	0.831058	920	0	0.20426
NonTargeting_Human_0894	1	0.63737	0.6386	0.999997	960	0	0.18191	0.36263	0.36243	0.831058	919	0	0.18191
NonTargeting_Human_0701	1	0.63778	0.63899	0.999997	961	0	0.15762	0.36222	0.36201	0.831058	918	0	0.15762
hsa-mir-1976	12	0.63811	0.83346	0.999997	962	2	0.45989	0.0056952	0.031826	0.563706	71	8	0.45989
NonTargeting_Human_0954	1	0.63934	0.64055	0.999997	963	0	0.18888	0.36066	0.36055	0.830947	917	0	0.18888
NonTargeting_Human_0015	1	0.64048	0.64173	0.999997	964	0	0.17672	0.35952	0.35943	0.830292	916	0	0.17672
NonTargeting_Human_0883	1	0.64196	0.64323	0.999997	965	0	0.37964	0.35804	0.35799	0.829162	914	0	0.37964
NonTargeting_Human_0201	1	0.64229	0.64355	0.999997	966	0	0.15029	0.35771	0.35764	0.829162	913	0	0.15029
NonTargeting_Human_0650	1	0.64237	0.64362	0.999997	967	0	0.13447	0.35763	0.3576	0.829162	912	0	0.13447
NonTargeting_Human_0379	1	0.6427	0.64398	0.999997	968	0	0.20772	0.3573	0.3573	0.829162	911	0	0.20772
NonTargeting_Human_0268	1	0.64303	0.64427	0.999997	969	0	0.24428	0.35697	0.35698	0.829162	910	0	0.24428
NonTargeting_Human_0017	1	0.64311	0.64437	0.999997	970	0	0.14731	0.35689	0.3569	0.829162	909	0	0.14731
NonTargeting_Human_0181	1	0.64418	0.64548	0.999997	971	0	0.20238	0.35582	0.35595	0.829162	908	0	0.20238
NonTargeting_Human_0177	1	0.64426	0.64557	0.999997	972	0	0.21631	0.35574	0.35588	0.829162	907	0	0.21631
NonTargeting_Human_0178	1	0.64442	0.64576	0.999997	973	0	0.17814	0.35558	0.35569	0.829162	906	0	0.17814
NonTargeting_Human_0275	1	0.64565	0.64706	0.999997	974	0	0.24725	0.35435	0.35444	0.829162	904	0	0.24725
NonTargeting_Human_0725	1	0.64647	0.64793	0.999997	975	0	0.26989	0.35353	0.35362	0.829162	902	0	0.26989
NUDT5	15	0.64697	0.86076	0.999997	976	4	0.051504	0.53959	0.80771	0.999997	1183	5	0.051504
TMEM199	15	0.64705	0.8608	0.999997	977	2	0.045705	0.96756	0.98686	0.999997	1665	2	0.045705
NR2C2AP	15	0.64723	0.86089	0.999997	978	4	0.026123	0.78156	0.92946	0.999997	1485	3	0.026123
NonTargeting_Human_0848	1	0.64787	0.64937	0.999997	979	0	0.21203	0.35213	0.35224	0.827889	900	0	0.21203
CIAO1	15	0.64839	0.86149	0.999997	980	3	-0.11898	0.73112	0.90554	0.999997	1427	4	-0.11898
NonTargeting_Human_0610	1	0.64943	0.65096	0.999997	981	0	0.23092	0.35057	0.35068	0.825315	898	0	0.23092
NonTargeting_Human_0829	1	0.64951	0.65101	0.999997	982	0	0.24569	0.35049	0.35055	0.825315	897	0	0.24569
BST2	15	0.6497	0.86215	0.999997	983	3	0.025061	0.48763	0.77092	0.998233	1112	4	0.025061
NonTargeting_Human_0872	1	0.65	0.65143	0.999997	984	0	0.16358	0.35	0.35002	0.825315	896	0	0.16358
NonTargeting_Human_0918	1	0.65016	0.65157	0.999997	985	0	0.25407	0.34984	0.34982	0.825315	895	0	0.25407
NonTargeting_Human_0936	1	0.6509	0.65235	0.999997	986	0	0.25192	0.3491	0.34907	0.825315	894	0	0.25192
NonTargeting_Human_0807	1	0.65205	0.65345	0.999997	987	0	0.25865	0.34795	0.34801	0.825315	893	0	0.25865
NonTargeting_Human_0942	1	0.6523	0.6537	0.999997	988	0	0.18447	0.3477	0.34774	0.825315	892	0	0.18447
NonTargeting_Human_0064	1	0.65312	0.65442	0.999997	989	0	0.28303	0.34688	0.34696	0.825315	891	0	0.28303
NonTargeting_Human_0983	1	0.65509	0.65649	0.999997	990	0	0.27034	0.34491	0.34519	0.825315	890	0	0.27034
LDLR	15	0.65574	0.86505	0.999997	991	1	0.4847	0.0068599	0.04007	0.597701	76	10	0.4847
NonTargeting_Human_0556	1	0.65574	0.65718	0.999997	992	0	0.26134	0.34426	0.34455	0.825315	889	0	0.26134
NonTargeting_Human_0285	1	0.65632	0.65775	0.999997	993	0	0.42376	0.34368	0.34398	0.825315	888	0	0.42376
NonTargeting_Human_0988	1	0.65673	0.65815	0.999997	994	0	0.30547	0.34327	0.34362	0.825315	887	0	0.30547
NonTargeting_Human_0363	1	0.65705	0.65844	0.999997	995	0	0.25702	0.34295	0.34322	0.825315	886	0	0.25702
CENPA	15	0.65736	0.86594	0.999997	996	2	0.075459	0.75945	0.91895	0.999997	1455	4	0.075459
NonTargeting_Human_0456	1	0.65738	0.65879	0.999997	997	0	0.18543	0.34262	0.3428	0.825315	885	0	0.18543
NonTargeting_Human_0700	1	0.65747	0.65884	0.999997	998	0	0.26311	0.34253	0.3427	0.825315	884	0	0.26311
NonTargeting_Human_0649	1	0.65763	0.65903	0.999997	999	0	0.24279	0.34237	0.34252	0.825315	883	0	0.24279
NonTargeting_Human_0952	1	0.65837	0.65964	0.999997	1000	0	0.11439	0.34163	0.34173	0.825315	880	0	0.11439
NonTargeting_Human_0313	1	0.65902	0.6602	0.999997	1001	0	0.16399	0.34098	0.34098	0.825315	879	0	0.16399
NonTargeting_Human_0857	1	0.65919	0.66037	0.999997	1002	0	0.26857	0.34081	0.34083	0.825315	877	0	0.26857
POLR1B	15	0.65999	0.8673	0.999997	1003	4	0.072521	0.011626	0.061608	0.657551	94	5	0.072521
NonTargeting_Human_0798	1	0.66001	0.66106	0.999997	1004	0	0.18243	0.33999	0.3398	0.825315	875	0	0.18243
NonTargeting_Human_0913	1	0.66042	0.6614	0.999997	1005	0	0.31458	0.33958	0.33943	0.825315	874	0	0.31458
NonTargeting_Human_0451	1	0.66091	0.66187	0.999997	1006	0	0.23096	0.33909	0.33899	0.825315	871	0	0.23096
BMI1	15	0.66096	0.86781	0.999997	1007	2	0.11601	0.39649	0.70376	0.964793	978	3	0.11601
PIGS	15	0.66334	0.86921	0.999997	1008	4	0.06753	0.23768	0.53432	0.895301	662	6	0.06753
NonTargeting_Human_0524	1	0.66362	0.66466	0.999997	1009	0	0.2027	0.33638	0.33617	0.825315	867	0	0.2027
NonTargeting_Human_0767	1	0.66378	0.66481	0.999997	1010	0	0.24244	0.33622	0.3359	0.825315	866	0	0.24244
NonTargeting_Human_0376	1	0.66419	0.6652	0.999997	1011	0	0.21099	0.33581	0.33548	0.825315	865	0	0.21099
NonTargeting_Human_0747	1	0.66452	0.66547	0.999997	1012	0	0.25573	0.33548	0.33513	0.825315	864	0	0.25573
NonTargeting_Human_0063	1	0.66493	0.66585	0.999997	1013	0	0.22364	0.33507	0.33473	0.825315	862	0	0.22364
NonTargeting_Human_0253	1	0.66518	0.66613	0.999997	1014	0	0.46222	0.33482	0.33452	0.825315	861	0	0.46222
NonTargeting_Human_0263	1	0.66542	0.66639	0.999997	1015	0	0.20524	0.33458	0.33418	0.825315	860	0	0.20524
NonTargeting_Human_0684	1	0.66649	0.66755	0.999997	1016	0	0.18413	0.33351	0.33302	0.825315	859	0	0.18413
NonTargeting_Human_0243	1	0.66682	0.66784	0.999997	1017	0	0.20962	0.33318	0.33267	0.825315	858	0	0.20962
NonTargeting_Human_0670	1	0.66706	0.66816	0.999997	1018	0	0.21895	0.33294	0.3324	0.825315	857	0	0.21895
NonTargeting_Human_0419	1	0.66715	0.66827	0.999997	1019	0	0.34167	0.33285	0.33234	0.825315	856	0	0.34167
NonTargeting_Human_0932	1	0.66739	0.66848	0.999997	1020	0	0.37202	0.33261	0.33208	0.825315	855	0	0.37202
hsa-mir-1302-6	7	0.66753	0.79037	0.999997	1021	2	-0.074759	0.60258	0.7485	0.992894	1273	1	-0.074759
TADA2A	15	0.66781	0.87144	0.999997	1022	3	0.34731	0.089611	0.29109	0.7989	312	7	0.34731
IRS2	15	0.66825	0.87178	0.999997	1023	3	0.24533	0.13105	0.37123	0.831058	422	6	0.24533
NonTargeting_Human_0662	1	0.66838	0.66946	0.999997	1024	0	0.27156	0.33162	0.33109	0.825315	853	0	0.27156
NonTargeting_Human_0318	1	0.66854	0.6696	0.999997	1025	0	0.24107	0.33146	0.33094	0.825315	852	0	0.24107
NonTargeting_Human_0992	1	0.66928	0.67034	0.999997	1026	0	0.425	0.33072	0.33025	0.825315	851	0	0.425
RPL28	15	0.6697	0.87251	0.999997	1027	2	0.34475	0.047731	0.18442	0.729667	227	8	0.34475
SUSD5	15	0.67023	0.87272	0.999997	1028	4	0.36285	0.012656	0.065578	0.663738	101	8	0.36285
NonTargeting_Human_0227	1	0.67075	0.6717	0.999997	1029	0	0.28204	0.32925	0.32874	0.825315	848	1	0.28204
NonTargeting_Human_0633	1	0.67158	0.67243	0.999997	1030	0	0.30842	0.32842	0.32792	0.825315	846	1	0.30842
NonTargeting_Human_0121	1	0.6733	0.67402	0.999997	1031	0	0.30068	0.3267	0.3262	0.825315	845	1	0.30068
NonTargeting_Human_0608	1	0.67371	0.67437	0.999997	1032	0	0.26881	0.32629	0.32585	0.825315	843	1	0.26881
NonTargeting_Human_0698	1	0.67387	0.67449	0.999997	1033	0	0.23802	0.32613	0.32567	0.825315	842	1	0.23802
NonTargeting_Human_0219	1	0.6742	0.67484	0.999997	1034	0	0.2706	0.3258	0.32529	0.825315	841	1	0.2706
NonTargeting_Human_0494	1	0.67436	0.67496	0.999997	1035	0	0.26147	0.32564	0.32516	0.825315	840	1	0.26147
CMAS	15	0.67607	0.87579	0.999997	1036	3	-0.061073	0.462	0.75268	0.993926	1073	4	-0.061073
NonTargeting_Human_0481	1	0.67625	0.67676	0.999997	1037	0	0.2514	0.32375	0.32333	0.825282	837	1	0.2514
ATP5I	15	0.67628	0.87588	0.999997	1038	4	-0.18379	0.050276	0.19154	0.738741	236	5	-0.18379
RPP38	15	0.67679	0.87609	0.999997	1039	4	0.27888	0.01006	0.055219	0.648914	87	7	0.27888
NonTargeting_Human_0166	1	0.67756	0.67809	0.999997	1040	0	0.38839	0.32244	0.32199	0.823061	836	1	0.38839
NonTargeting_Human_0186	1	0.67781	0.67834	0.999997	1041	0	0.31629	0.32219	0.32169	0.823061	835	1	0.31629
NonTargeting_Human_0703	1	0.67814	0.67868	0.999997	1042	0	0.4027	0.32186	0.32138	0.823061	834	1	0.4027
ALG14	15	0.67829	0.87676	0.999997	1043	4	-0.27275	0.0088307	0.049615	0.62029	84	5	-0.27275
NonTargeting_Human_0140	1	0.67838	0.67894	0.999997	1044	0	0.19094	0.32162	0.32115	0.823061	833	1	0.19094
PQBP1	15	0.67929	0.87723	0.999997	1045	4	-0.064845	0.79199	0.93241	0.999997	1500	2	-0.064845
NonTargeting_Human_0306	1	0.67945	0.6799	0.999997	1046	0	0.24404	0.32055	0.32013	0.823061	832	1	0.24404
PGAP3	15	0.67979	0.87749	0.999997	1047	4	-0.10763	0.16604	0.43366	0.86092	508	5	-0.10763
NonTargeting_Human_0961	1	0.67986	0.68042	0.999997	1048	0	0.37115	0.32014	0.31966	0.823061	831	1	0.37115
NonTargeting_Human_0618	1	0.68093	0.68157	0.999997	1049	0	0.39931	0.31907	0.31855	0.823061	828	1	0.39931
NonTargeting_Human_0025	1	0.68134	0.68197	0.999997	1050	0	0.32181	0.31866	0.31807	0.823061	827	1	0.32181
NonTargeting_Human_0245	1	0.68232	0.68294	0.999997	1051	0	0.23044	0.31768	0.31699	0.823061	825	1	0.23044
NonTargeting_Human_0139	1	0.68372	0.68437	0.999997	1052	0	0.35614	0.31628	0.31568	0.823061	823	1	0.35614
NonTargeting_Human_0136	1	0.68388	0.68458	0.999997	1053	0	0.35751	0.31612	0.31549	0.823061	822	1	0.35751
NonTargeting_Human_0163	1	0.68445	0.68518	0.999997	1054	0	0.228	0.31555	0.31494	0.823061	821	1	0.228
NonTargeting_Human_0891	1	0.68503	0.68569	0.999997	1055	0	0.22011	0.31497	0.3143	0.823061	820	1	0.22011
NonTargeting_Human_0559	1	0.68519	0.6859	0.999997	1056	0	0.39	0.31481	0.31418	0.823061	819	1	0.39
AQP10	15	0.68576	0.8806	0.999997	1057	3	0.29842	0.034655	0.14614	0.726	183	8	0.29842
NonTargeting_Human_0516	1	0.68708	0.68763	0.999997	1058	0	0.29761	0.31292	0.31242	0.821388	815	1	0.29761
NonTargeting_Human_0733	1	0.68815	0.68862	0.999997	1059	0	0.34562	0.31185	0.3113	0.820925	814	1	0.34562
NonTargeting_Human_0929	1	0.68938	0.68996	0.999997	1060	0	0.24144	0.31062	0.31007	0.818907	813	1	0.24144
NonTargeting_Human_0145	1	0.68987	0.69044	0.999997	1061	0	0.37704	0.31013	0.30959	0.818907	811	1	0.37704
SMOC1	15	0.68997	0.8829	0.999997	1062	4	0.31726	0.067273	0.23841	0.77868	271	8	0.31726
NonTargeting_Human_0441	1	0.69094	0.69156	0.999997	1063	0	0.45743	0.30906	0.30841	0.818234	808	1	0.45743
NonTargeting_Human_0225	1	0.69143	0.69205	0.999997	1064	0	0.29785	0.30857	0.30793	0.818234	807	1	0.29785
NonTargeting_Human_0975	1	0.69208	0.69275	0.999997	1065	0	0.25072	0.30792	0.30736	0.818234	806	1	0.25072
NonTargeting_Human_0915	1	0.69217	0.69283	0.999997	1066	0	0.2666	0.30783	0.3073	0.818234	805	1	0.2666
NonTargeting_Human_0175	1	0.69233	0.69298	0.999997	1067	0	0.28286	0.30767	0.30716	0.818234	804	1	0.28286
NonTargeting_Human_0660	1	0.69381	0.69426	0.999997	1068	0	0.33486	0.30619	0.30573	0.818234	803	1	0.33486
NonTargeting_Human_0875	1	0.69586	0.69622	0.999997	1069	0	0.26359	0.30414	0.30386	0.81605	800	1	0.26359
NonTargeting_Human_0024	1	0.69824	0.69862	0.999997	1070	0	0.34247	0.30176	0.30166	0.811372	798	1	0.34247
NonTargeting_Human_0515	1	0.69832	0.6987	0.999997	1071	0	0.34608	0.30168	0.30157	0.811372	797	1	0.34608
NonTargeting_Human_0045	1	0.69947	0.69981	0.999997	1072	0	0.25641	0.30053	0.30043	0.810546	796	1	0.25641
RPL23A	15	0.70029	0.88822	0.999997	1073	3	0.038437	0.11828	0.34684	0.825315	388	7	0.038437
PTCHD4	15	0.70055	0.88835	0.999997	1074	3	0.2333	0.045542	0.17842	0.726	221	7	0.2333
NonTargeting_Human_0325	1	0.70103	0.70143	0.999997	1075	0	0.33414	0.29897	0.29886	0.80758	795	1	0.33414
TMEM30B	15	0.70132	0.88881	0.999997	1076	2	0.14821	0.027261	0.12251	0.704966	167	6	0.14821
AKAP9	15	0.70185	0.88914	0.999997	1077	4	-0.021792	0.61282	0.85126	0.999997	1285	4	-0.021792
NDUFV1	15	0.70274	0.88954	0.999997	1078	2	0.61886	0.019969	0.094987	0.70065	136	9	0.61886
NonTargeting_Human_0651	1	0.70349	0.70384	0.999997	1079	0	0.24715	0.29651	0.29644	0.804057	791	1	0.24715
NonTargeting_Human_0350	1	0.70463	0.70501	0.999997	1080	0	0.31583	0.29537	0.29523	0.803802	790	1	0.31583
NonTargeting_Human_0551	1	0.70488	0.70522	0.999997	1081	0	0.20732	0.29512	0.29496	0.803802	789	1	0.20732
WARS	15	0.70516	0.89073	0.999997	1082	4	0.22324	0.17378	0.4468	0.869895	526	6	0.22324
NonTargeting_Human_0593	1	0.70521	0.70552	0.999997	1083	0	0.41473	0.29479	0.29461	0.803802	788	1	0.41473
NonTargeting_Human_0953	1	0.70726	0.70739	0.999997	1084	0	0.33694	0.29274	0.29238	0.801198	787	1	0.33694
CCT6B	15	0.7073	0.89171	0.999997	1085	4	0.02258	0.012118	0.06348	0.658096	97	6	0.02258
NonTargeting_Human_0572	1	0.70857	0.70859	0.999997	1086	0	0.27379	0.29143	0.29103	0.7989	784	1	0.27379
KDM8	15	0.70872	0.89249	0.999997	1087	4	-0.031567	0.25909	0.5598	0.908604	709	4	-0.031567
NonTargeting_Human_0490	1	0.70906	0.70915	0.999997	1088	0	0.29377	0.29094	0.29054	0.7989	783	1	0.29377
TBXAS1	15	0.70919	0.8927	0.999997	1089	3	0.51591	0.011818	0.062338	0.657551	96	9	0.51591
NonTargeting_Human_0825	1	0.70947	0.70956	0.999997	1090	0	0.35324	0.29053	0.29017	0.7989	782	1	0.35324
NonTargeting_Human_0553	1	0.7098	0.7099	0.999997	1091	0	0.29903	0.2902	0.28979	0.7989	781	1	0.29903
NonTargeting_Human_0259	1	0.71046	0.71053	0.999997	1092	0	0.30907	0.28954	0.28922	0.7989	779	1	0.30907
NonTargeting_Human_0109	1	0.7112	0.71129	0.999997	1093	0	0.2051	0.2888	0.28849	0.7989	778	1	0.2051
NonTargeting_Human_0656	1	0.71128	0.7114	0.999997	1094	0	0.3494	0.28872	0.28842	0.7989	777	1	0.3494
NonTargeting_Human_0192	1	0.71144	0.71157	0.999997	1095	0	0.28386	0.28856	0.28827	0.7989	776	1	0.28386
NonTargeting_Human_0152	1	0.71218	0.7123	0.999997	1096	0	0.24009	0.28782	0.28748	0.7989	775	1	0.24009
MOCS3	15	0.71228	0.89429	0.999997	1097	4	0.19551	0.21724	0.50956	0.881963	624	6	0.19551
NonTargeting_Human_0739	1	0.71243	0.71256	0.999997	1098	0	0.46463	0.28757	0.28721	0.7989	774	1	0.46463
NonTargeting_Human_0862	1	0.71251	0.7127	0.999997	1099	0	0.35395	0.28749	0.28709	0.7989	773	1	0.35395
NonTargeting_Human_0624	1	0.71259	0.71278	0.999997	1100	0	0.48701	0.28741	0.28701	0.7989	772	1	0.48701
NonTargeting_Human_0452	1	0.71481	0.71501	0.999997	1101	0	0.37231	0.28519	0.28472	0.7989	771	1	0.37231
NonTargeting_Human_0533	1	0.71522	0.71545	0.999997	1102	0	0.38439	0.28478	0.28429	0.7989	769	1	0.38439
NonTargeting_Human_0501	1	0.71579	0.71606	0.999997	1103	0	0.31032	0.28421	0.28377	0.7989	767	1	0.31032
CCZ1	15	0.71665	0.89653	0.999997	1104	3	0.19214	0.004595	0.02823	0.542241	68	6	0.19214
NonTargeting_Human_0070	1	0.71743	0.71776	0.999997	1105	0	0.29794	0.28257	0.28217	0.797469	766	1	0.29794
MTFP1	15	0.71743	0.89685	0.999997	1106	1	0.42954	0.014143	0.071289	0.669111	107	9	0.42954
NonTargeting_Human_0303	1	0.71833	0.71859	0.999997	1107	0	0.23277	0.28167	0.28121	0.796765	764	1	0.23277
CPM	15	0.71913	0.89778	0.999997	1108	2	0.16789	0.091904	0.29563	0.803802	316	6	0.16789
NonTargeting_Human_0149	1	0.71924	0.71946	0.999997	1109	0	0.25936	0.28076	0.28033	0.795569	762	1	0.25936
NonTargeting_Human_0415	1	0.71965	0.7199	0.999997	1110	0	0.28518	0.28035	0.27997	0.795569	761	1	0.28518
NonTargeting_Human_0890	1	0.72055	0.72072	0.999997	1111	0	0.22585	0.27945	0.27914	0.79476	759	1	0.22585
NonTargeting_Human_0526	1	0.72088	0.72106	0.999997	1112	0	0.35293	0.27912	0.27883	0.79476	758	1	0.35293
NonTargeting_Human_0720	1	0.72121	0.72141	0.999997	1113	0	0.32136	0.27879	0.27855	0.79476	757	1	0.32136
NonTargeting_Human_0802	1	0.72227	0.72266	0.999997	1114	0	0.45004	0.27773	0.27743	0.79377	755	1	0.45004
ERCC3	15	0.72272	0.89968	0.999997	1115	2	0.35257	0.16491	0.43167	0.86065	503	6	0.35257
NonTargeting_Human_0164	1	0.72326	0.72374	0.999997	1116	0	0.46424	0.27674	0.27659	0.792654	753	1	0.46424
NonTargeting_Human_0067	1	0.72383	0.72422	0.999997	1117	0	0.28175	0.27617	0.27599	0.792233	752	1	0.28175
JAK1	15	0.72472	0.90069	0.999997	1118	3	0.042248	0.24102	0.53811	0.899077	667	6	0.042248
TAF1B	15	0.72545	0.90103	0.999997	1119	4	0.10251	0.36739	0.68054	0.951021	930	4	0.10251
DHDDS	15	0.72568	0.90116	0.999997	1120	4	-0.19085	0.5127	0.78885	0.999997	1152	5	-0.19085
MRPS31	15	0.72591	0.90131	0.999997	1121	4	-0.027425	0.45054	0.74423	0.991051	1051	4	-0.027425
NonTargeting_Human_0368	1	0.72596	0.72639	0.999997	1122	0	0.44767	0.27404	0.27382	0.787275	750	1	0.44767
NonTargeting_Human_0433	1	0.72646	0.72687	0.999997	1123	0	0.39187	0.27354	0.27332	0.787153	749	1	0.39187
NonTargeting_Human_0324	1	0.72687	0.72726	0.999997	1124	0	0.53532	0.27313	0.27295	0.787153	748	1	0.53532
SP140	15	0.72693	0.90177	0.999997	1125	3	0.45862	0.0038288	0.024091	0.514553	65	9	0.45862
NonTargeting_Human_0367	1	0.72703	0.72745	0.999997	1126	0	0.3111	0.27297	0.2728	0.787153	747	1	0.3111
SLAMF6	15	0.72705	0.90182	0.999997	1127	4	-0.042555	0.045405	0.17808	0.726	218	6	-0.042555
WRNIP1	15	0.72755	0.90204	0.999997	1128	3	0.091473	0.2744	0.57775	0.913193	751	5	0.091473
PES1	15	0.72802	0.90229	0.999997	1129	3	0.25013	0.13087	0.37089	0.831058	421	7	0.25013
NonTargeting_Human_0665	1	0.72842	0.72872	0.999997	1130	0	0.25479	0.27158	0.27149	0.785754	745	1	0.25479
NonTargeting_Human_0851	1	0.72867	0.72901	0.999997	1131	0	0.66998	0.27133	0.27125	0.785754	744	1	0.66998
NonTargeting_Human_0442	1	0.7299	0.73018	0.999997	1132	0	0.42669	0.2701	0.27	0.784042	743	1	0.42669
NonTargeting_Human_0873	1	0.73064	0.73093	0.999997	1133	0	0.24734	0.26936	0.2693	0.783305	742	1	0.24734
FRYL	15	0.7312	0.90397	0.999997	1134	4	0.043025	0.010964	0.05903	0.657551	91	6	0.043025
NonTargeting_Human_0395	1	0.7313	0.73159	0.999997	1135	0	0.39104	0.2687	0.26862	0.782615	741	1	0.39104
NonTargeting_Human_0455	1	0.73179	0.73209	0.999997	1136	0	0.53559	0.26821	0.26819	0.782615	738	1	0.53559
NonTargeting_Human_0984	1	0.73203	0.73235	0.999997	1137	0	0.35645	0.26797	0.26795	0.782615	736	1	0.35645
NonTargeting_Human_0626	1	0.73269	0.73292	0.999997	1138	0	0.31023	0.26731	0.26726	0.782567	735	1	0.31023
CREB5	15	0.73427	0.90552	0.999997	1139	4	-0.12343	0.33509	0.64547	0.937944	863	4	-0.12343
NonTargeting_Human_0421	1	0.73458	0.7348	0.999997	1140	0	0.27942	0.26542	0.26548	0.77996	731	1	0.27942
ZNF646	15	0.73506	0.90598	0.999997	1141	3	-0.031492	0.56973	0.8276	0.999997	1227	3	-0.031492
NonTargeting_Human_0160	1	0.73515	0.73541	0.999997	1142	0	0.31798	0.26485	0.26486	0.779458	730	1	0.31798
NonTargeting_Human_0985	1	0.73581	0.73616	0.999997	1143	0	0.46227	0.26419	0.26416	0.778703	728	1	0.46227
NonTargeting_Human_0198	1	0.73622	0.73661	0.999997	1144	0	0.27069	0.26378	0.26371	0.77868	727	1	0.27069
NELFA	15	0.73628	0.90657	0.999997	1145	4	-0.082237	0.53006	0.80079	0.999997	1174	4	-0.082237
NonTargeting_Human_0423	1	0.73638	0.7367	0.999997	1146	0	0.31203	0.26362	0.26353	0.77868	726	1	0.31203
NonTargeting_Human_0007	1	0.73687	0.73715	0.999997	1147	0	0.3549	0.26313	0.26306	0.77868	724	1	0.3549
NonTargeting_Human_0099	1	0.73696	0.73731	0.999997	1148	0	0.43173	0.26304	0.26296	0.77868	723	1	0.43173
NonTargeting_Human_0187	1	0.73704	0.73737	0.999997	1149	0	0.45646	0.26296	0.26287	0.77868	721	1	0.45646
NonTargeting_Human_0075	1	0.73728	0.73763	0.999997	1150	0	0.35928	0.26272	0.26257	0.77868	720	1	0.35928
NonTargeting_Human_0497	1	0.73737	0.73772	0.999997	1151	0	0.30521	0.26263	0.26248	0.77868	719	1	0.30521
NonTargeting_Human_0869	1	0.73794	0.73833	0.999997	1152	0	0.47957	0.26206	0.26186	0.77868	717	1	0.47957
NonTargeting_Human_0290	1	0.73827	0.73869	0.999997	1153	0	0.29174	0.26173	0.26148	0.77868	716	1	0.29174
NonTargeting_Human_0803	1	0.73909	0.7395	0.999997	1154	0	0.34907	0.26091	0.26071	0.77868	714	1	0.34907
NonTargeting_Human_0941	1	0.73942	0.73977	0.999997	1155	0	0.51269	0.26058	0.26036	0.77868	713	1	0.51269
TPI1	15	0.73947	0.90816	0.999997	1156	1	0.43555	0.0029272	0.018747	0.481059	57	10	0.43555
NonTargeting_Human_0822	1	0.74048	0.74081	0.999997	1157	0	0.42684	0.25952	0.25942	0.77868	711	1	0.42684
NonTargeting_Human_0281	1	0.74065	0.74103	0.999997	1158	0	0.26336	0.25935	0.25927	0.77868	710	1	0.26336
ITGA1	15	0.74115	0.90898	0.999997	1159	4	0.082506	0.20629	0.4958	0.881963	599	5	0.082506
TRIAP1	15	0.74122	0.90903	0.999997	1160	3	0.19284	0.5597	0.82084	0.999997	1212	5	0.19284
NonTargeting_Human_0641	1	0.74155	0.74194	0.999997	1161	0	0.39883	0.25845	0.25847	0.77868	708	1	0.39883
NonTargeting_Human_0779	1	0.74237	0.74285	0.999997	1162	0	0.47614	0.25763	0.25752	0.77868	707	1	0.47614
NonTargeting_Human_0976	1	0.74253	0.743	0.999997	1163	0	0.33536	0.25747	0.25734	0.77868	706	1	0.33536
NonTargeting_Human_0450	1	0.74295	0.74341	0.999997	1164	0	0.24948	0.25705	0.25687	0.77868	705	1	0.24948
NonTargeting_Human_0697	1	0.74327	0.74371	0.999997	1165	0	0.29431	0.25673	0.25652	0.77868	703	1	0.29431
NonTargeting_Human_0006	1	0.74352	0.74395	0.999997	1166	0	0.38811	0.25648	0.25627	0.77868	702	1	0.38811
NonTargeting_Human_0486	1	0.74393	0.74427	0.999997	1167	0	0.35207	0.25607	0.25586	0.77868	701	1	0.35207
NonTargeting_Human_0058	1	0.74401	0.74435	0.999997	1168	0	0.36628	0.25599	0.25581	0.77868	700	1	0.36628
NonTargeting_Human_0652	1	0.74409	0.74444	0.999997	1169	0	0.44029	0.25591	0.2557	0.77868	699	1	0.44029
NonTargeting_Human_0619	1	0.74459	0.74497	0.999997	1170	0	0.48188	0.25541	0.25526	0.77868	698	1	0.48188
NonTargeting_Human_0240	1	0.74508	0.74548	0.999997	1171	0	0.24868	0.25492	0.25478	0.77868	696	1	0.24868
NonTargeting_Human_0012	1	0.74557	0.74603	0.999997	1172	0	0.40521	0.25443	0.2542	0.77868	695	1	0.40521
NonTargeting_Human_0820	1	0.74582	0.74626	0.999997	1173	0	0.27615	0.25418	0.25401	0.77868	694	1	0.27615
NonTargeting_Human_0735	1	0.7459	0.74637	0.999997	1174	0	0.34124	0.2541	0.25393	0.77868	693	1	0.34124
NonTargeting_Human_0769	1	0.74623	0.74666	0.999997	1175	0	0.39243	0.25377	0.25357	0.77868	692	1	0.39243
hsa-mir-7973-1	4	0.7464	0.74833	0.999997	1176	1	0.77961	0.041176	0.099482	0.70065	205	2	0.77961
CCDC169-SOHLH2	15	0.74671	0.91117	0.999997	1177	3	0.27264	0.074269	0.25608	0.77868	289	8	0.27264
NonTargeting_Human_0861	1	0.74672	0.7471	0.999997	1178	0	0.27169	0.25328	0.2531	0.77868	691	1	0.27169
NonTargeting_Human_0133	1	0.7468	0.7472	0.999997	1179	0	0.39337	0.2532	0.25302	0.77868	689	1	0.39337
NonTargeting_Human_0056	1	0.74811	0.74843	0.999997	1180	0	0.28729	0.25189	0.25172	0.77868	686	1	0.28729
NonTargeting_Human_0084	1	0.7491	0.74936	0.999997	1181	0	0.37803	0.2509	0.25073	0.77868	684	1	0.37803
NonTargeting_Human_0223	1	0.74926	0.74952	0.999997	1182	0	0.45855	0.25074	0.25057	0.77868	683	1	0.45855
NonTargeting_Human_0785	1	0.74975	0.74998	0.999997	1183	0	0.35588	0.25025	0.25007	0.77868	682	1	0.35588
NonTargeting_Human_0236	1	0.74984	0.75004	0.999997	1184	0	0.45787	0.25016	0.24999	0.77868	681	1	0.45787
NonTargeting_Human_0386	1	0.75016	0.75039	0.999997	1185	0	0.65073	0.24984	0.24969	0.77868	680	1	0.65073
NonTargeting_Human_0409	1	0.75123	0.75143	0.999997	1186	0	0.27763	0.24877	0.24868	0.77868	679	1	0.27763
NonTargeting_Human_0882	1	0.75172	0.752	0.999997	1187	0	0.60854	0.24828	0.24819	0.77868	678	1	0.60854
ZNF22	15	0.75215	0.9129	0.999997	1188	1	0.52458	0.00036576	0.0029658	0.140353	36	11	0.52458
NonTargeting_Human_0377	1	0.75336	0.75367	0.999997	1189	0	0.41351	0.24664	0.24656	0.77868	676	1	0.41351
INTS2	15	0.75382	0.91346	0.999997	1190	3	0.27014	0.072672	0.25214	0.77868	288	8	0.27014
NAA10	15	0.75401	0.91352	0.999997	1191	2	0.051689	0.658	0.87195	0.999997	1349	3	0.051689
CHRND	15	0.75402	0.91352	0.999997	1192	3	0.055242	0.60442	0.84723	0.999997	1276	3	0.055242
NonTargeting_Human_0787	1	0.7541	0.75442	0.999997	1193	0	0.50894	0.2459	0.24581	0.77868	674	1	0.50894
KRTAP13-2	15	0.75424	0.9136	0.999997	1194	3	0.27186	0.043809	0.17366	0.726	211	8	0.27186
NonTargeting_Human_0594	1	0.75484	0.75522	0.999997	1195	0	0.51476	0.24516	0.24519	0.77868	673	1	0.51476
NonTargeting_Human_0821	1	0.75533	0.75564	0.999997	1196	0	0.41706	0.24467	0.24473	0.77868	672	1	0.41706
NonTargeting_Human_0428	1	0.7555	0.75584	0.999997	1197	0	0.4021	0.2445	0.2446	0.77868	671	1	0.4021
LRRC8A	15	0.75614	0.91423	0.999997	1198	2	0.42517	0.00072364	0.0056856	0.236818	42	11	0.42517
NID1	15	0.75652	0.91433	0.999997	1199	3	0.14266	0.14266	0.39221	0.839586	448	5	0.14266
NonTargeting_Human_0157	1	0.75705	0.75747	0.999997	1200	0	0.38451	0.24295	0.24282	0.77868	670	1	0.38451
IRS4	15	0.7581	0.91486	0.999997	1201	3	0.22882	0.047791	0.1846	0.729667	229	6	0.22882
NonTargeting_Human_0230	1	0.75861	0.75896	0.999997	1202	0	0.41943	0.24139	0.24134	0.77868	669	1	0.41943
NonTargeting_Human_0529	1	0.75886	0.75929	0.999997	1203	0	0.28473	0.24114	0.24109	0.77868	668	1	0.28473
NonTargeting_Human_0353	1	0.75902	0.75944	0.999997	1204	0	0.82727	0.24098	0.24088	0.77868	666	1	0.82727
NonTargeting_Human_0505	1	0.75911	0.75951	0.999997	1205	0	0.48557	0.24089	0.24078	0.77868	665	1	0.48557
TMEM183A	15	0.76012	0.91559	0.999997	1206	3	0.099261	0.2015	0.48965	0.881963	592	5	0.099261
NonTargeting_Human_0860	1	0.76042	0.76078	0.999997	1207	0	0.44365	0.23958	0.23943	0.77868	664	1	0.44365
NonTargeting_Human_0606	1	0.76066	0.76098	0.999997	1208	0	0.46773	0.23934	0.23922	0.77868	663	1	0.46773
NonTargeting_Human_0844	1	0.76239	0.76264	0.999997	1209	0	0.575	0.23761	0.23749	0.77868	661	1	0.575
NonTargeting_Human_0732	1	0.76247	0.76274	0.999997	1210	0	0.7238	0.23753	0.23738	0.77868	660	1	0.7238
NonTargeting_Human_0943	1	0.76345	0.7637	0.999997	1211	0	0.57493	0.23655	0.23651	0.77868	659	1	0.57493
NonTargeting_Human_0482	1	0.76354	0.76375	0.999997	1212	0	0.38142	0.23646	0.23641	0.77868	658	1	0.38142
NonTargeting_Human_0307	1	0.766	0.76637	0.999997	1213	0	0.52045	0.234	0.23406	0.77868	656	1	0.52045
NonTargeting_Human_0170	1	0.76657	0.76702	0.999997	1214	0	0.43208	0.23343	0.23344	0.77868	655	1	0.43208
NonTargeting_Human_0250	1	0.7669	0.76735	0.999997	1215	0	0.34113	0.2331	0.23304	0.77868	654	1	0.34113
CAPN15	15	0.76742	0.91793	0.999997	1216	1	0.0042242	0.73936	0.90929	0.999997	1434	3	0.0042242
NonTargeting_Human_0401	1	0.76788	0.76841	0.999997	1217	0	0.36534	0.23212	0.23205	0.778394	653	1	0.36534
TRIM4	15	0.76835	0.91819	0.999997	1218	2	0.27134	0.014981	0.074783	0.674977	114	7	0.27134
NonTargeting_Human_0568	1	0.76879	0.76927	0.999997	1219	0	0.4373	0.23121	0.23126	0.777323	652	1	0.4373
NonTargeting_Human_0552	1	0.76985	0.77027	0.999997	1220	0	0.63281	0.23015	0.2301	0.776407	650	1	0.63281
INTS8	15	0.7705	0.91886	0.999997	1221	3	0.49672	0.06984	0.24499	0.77868	280	8	0.49672
NonTargeting_Human_0228	1	0.77059	0.77099	0.999997	1222	0	0.29374	0.22941	0.22939	0.776407	649	1	0.29374
NonTargeting_Human_0321	1	0.77084	0.77127	0.999997	1223	0	0.4046	0.22916	0.22917	0.776407	648	1	0.4046
SERPINB5	15	0.77149	0.91918	0.999997	1224	2	0.36345	0.051979	0.19633	0.739172	239	8	0.36345
NonTargeting_Human_0105	1	0.77207	0.77256	0.999997	1225	0	0.41439	0.22793	0.22787	0.774748	643	1	0.41439
NonTargeting_Human_0344	1	0.77264	0.77311	0.999997	1226	0	0.41837	0.22736	0.2273	0.774309	642	1	0.41837
NonTargeting_Human_0745	1	0.7733	0.77375	0.999997	1227	0	0.38638	0.2267	0.22657	0.773329	641	1	0.38638
NonTargeting_Human_0098	1	0.77387	0.7743	0.999997	1228	0	0.36371	0.22613	0.22595	0.772732	640	1	0.36371
NonTargeting_Human_0775	1	0.77395	0.77439	0.999997	1229	0	0.45854	0.22605	0.22588	0.772732	639	1	0.45854
NonTargeting_Human_0061	1	0.77502	0.77544	0.999997	1230	0	0.38308	0.22498	0.22472	0.772732	638	1	0.38308
NonTargeting_Human_0540	1	0.77568	0.77615	0.999997	1231	0	0.37522	0.22432	0.22398	0.772732	637	1	0.37522
NonTargeting_Human_0784	1	0.77592	0.77644	0.999997	1232	0	0.52704	0.22408	0.22373	0.772732	636	1	0.52704
NonTargeting_Human_0120	1	0.776	0.77655	0.999997	1233	0	0.40114	0.224	0.22363	0.772732	635	1	0.40114
NXPH2	15	0.77701	0.92078	0.999997	1234	2	0.2619	0.017028	0.082994	0.698662	126	7	0.2619
NonTargeting_Human_0078	1	0.7774	0.77804	0.999997	1235	0	0.49828	0.2226	0.22226	0.772189	633	1	0.49828
NonTargeting_Human_0604	1	0.77765	0.77829	0.999997	1236	0	0.50382	0.22235	0.22202	0.772189	632	1	0.50382
NonTargeting_Human_0472	1	0.77773	0.77836	0.999997	1237	0	0.5796	0.22227	0.22195	0.772189	631	1	0.5796
NonTargeting_Human_0763	1	0.77847	0.77904	0.999997	1238	0	0.60849	0.22153	0.22124	0.772189	630	1	0.60849
NonTargeting_Human_0617	1	0.78043	0.78102	0.999997	1239	0	0.33974	0.21957	0.21937	0.769787	628	1	0.33974
PPAT	15	0.78062	0.92207	0.999997	1240	3	0.25633	0.28015	0.58422	0.913193	760	6	0.25633
NonTargeting_Human_0980	1	0.78117	0.78184	0.999997	1241	0	0.67956	0.21883	0.21863	0.768708	627	1	0.67956
NonTargeting_Human_0430	1	0.78167	0.78234	0.999997	1242	0	0.70236	0.21833	0.21815	0.768582	626	1	0.70236
CTIF	15	0.78763	0.92453	0.999997	1243	3	-0.053769	0.68885	0.88604	0.999997	1393	3	-0.053769
OR5AR1	15	0.78783	0.92457	0.999997	1244	3	0.35297	0.010831	0.058368	0.657551	89	8	0.35297
NonTargeting_Human_0434	1	0.78815	0.78876	0.999997	1245	0	0.49071	0.21185	0.21144	0.750979	616	1	0.49071
NonTargeting_Human_0123	1	0.78823	0.78882	0.999997	1246	0	0.30911	0.21177	0.21138	0.750979	615	1	0.30911
NonTargeting_Human_0998	1	0.78847	0.78903	0.999997	1247	0	0.39022	0.21153	0.21117	0.750979	614	1	0.39022
NonTargeting_Human_0776	1	0.78864	0.78919	0.999997	1248	0	0.35977	0.21136	0.21099	0.750979	612	1	0.35977
NonTargeting_Human_0328	1	0.78938	0.78988	0.999997	1249	0	0.49065	0.21062	0.21033	0.750979	611	1	0.49065
NonTargeting_Human_0174	1	0.78962	0.79008	0.999997	1250	0	0.4125	0.21038	0.21001	0.750979	610	1	0.4125
NonTargeting_Human_0525	1	0.79036	0.79085	0.999997	1251	0	0.35721	0.20964	0.20937	0.750979	608	1	0.35721
TMEM221	15	0.7909	0.92552	0.999997	1252	3	0.19566	0.1526	0.40976	0.84923	474	7	0.19566
NonTargeting_Human_0801	1	0.79102	0.79152	0.999997	1253	0	0.45442	0.20898	0.20862	0.750979	606	1	0.45442
NonTargeting_Human_0463	1	0.79151	0.79195	0.999997	1254	0	0.44348	0.20849	0.20817	0.750979	605	1	0.44348
NonTargeting_Human_0335	1	0.79233	0.79274	0.999997	1255	0	0.40391	0.20767	0.20758	0.750979	602	1	0.40391
NonTargeting_Human_0754	1	0.79454	0.79502	0.999997	1256	0	0.35766	0.20546	0.20528	0.747278	598	1	0.35766
NonTargeting_Human_0885	1	0.79471	0.79519	0.999997	1257	0	0.75686	0.20529	0.20513	0.747278	597	1	0.75686
NonTargeting_Human_0279	1	0.79602	0.79658	0.999997	1258	0	0.50998	0.20398	0.20377	0.746243	595	1	0.50998
NonTargeting_Human_0439	1	0.79701	0.79756	0.999997	1259	0	0.21785	0.20299	0.20285	0.746183	594	1	0.21785
NonTargeting_Human_0541	1	0.7984	0.79897	0.999997	1260	0	0.39148	0.2016	0.2014	0.745557	593	1	0.39148
SNX19	15	0.79951	0.92845	0.999997	1261	3	0.13226	0.036823	0.15271	0.726	192	7	0.13226
NonTargeting_Human_0011	1	0.79979	0.80033	0.999997	1262	0	0.48352	0.20021	0.19993	0.741704	591	1	0.48352
NonTargeting_Human_0973	1	0.80004	0.80059	0.999997	1263	0	0.86422	0.19996	0.19966	0.741704	590	1	0.86422
OTC	15	0.80008	0.9286	0.999997	1264	3	0.13442	0.025189	0.11473	0.70065	158	6	0.13442
NonTargeting_Human_0527	1	0.80127	0.80182	0.999997	1265	0	0.33107	0.19873	0.19841	0.739172	588	1	0.33107
NonTargeting_Human_0508	1	0.80176	0.80229	0.999997	1266	0	0.6853	0.19824	0.19795	0.739172	587	1	0.6853
UBE2O	15	0.80187	0.92921	0.999997	1267	3	0.10891	0.0069193	0.040297	0.597701	77	6	0.10891
NonTargeting_Human_0602	1	0.80226	0.8028	0.999997	1268	0	0.37134	0.19774	0.19743	0.739172	585	1	0.37134
NonTargeting_Human_0117	1	0.80242	0.80296	0.999997	1269	0	0.55119	0.19758	0.19724	0.739172	584	1	0.55119
ORMDL3	15	0.8032	0.92962	0.999997	1270	2	0.47644	0.0024967	0.016474	0.479639	55	10	0.47644
NonTargeting_Human_0432	1	0.8034	0.80382	0.999997	1271	0	0.34143	0.1966	0.1963	0.739172	582	1	0.34143
NonTargeting_Human_0155	1	0.80431	0.8048	0.999997	1272	0	0.45153	0.19569	0.19535	0.7388	581	1	0.45153
NonTargeting_Human_0397	1	0.80463	0.8051	0.999997	1273	0	0.43202	0.19537	0.19504	0.7388	579	1	0.43202
NonTargeting_Human_0959	1	0.80521	0.80567	0.999997	1274	0	0.54579	0.19479	0.19449	0.738741	578	1	0.54579
NonTargeting_Human_0495	1	0.80529	0.80575	0.999997	1275	0	0.39599	0.19471	0.19441	0.738741	577	1	0.39599
NonTargeting_Human_0141	1	0.80537	0.80585	0.999997	1276	0	0.27003	0.19463	0.19434	0.738741	576	1	0.27003
NonTargeting_Human_0256	1	0.80546	0.80595	0.999997	1277	0	0.38234	0.19454	0.19429	0.738741	575	1	0.38234
NonTargeting_Human_0080	1	0.80644	0.80679	0.999997	1278	0	0.59425	0.19356	0.19343	0.738741	573	1	0.59425
NonTargeting_Human_0346	1	0.8071	0.80735	0.999997	1279	0	0.46136	0.1929	0.19276	0.738741	571	1	0.46136
NonTargeting_Human_0425	1	0.80742	0.80767	0.999997	1280	0	0.38224	0.19258	0.19237	0.738741	568	1	0.38224
NonTargeting_Human_0519	1	0.808	0.80815	0.999997	1281	0	0.38767	0.192	0.19187	0.738741	567	1	0.38767
hsa-mir-532	15	0.80917	0.93188	0.999997	1282	3	-0.016227	0.45854	0.7502	0.992894	1067	5	-0.016227
NonTargeting_Human_0330	1	0.8098	0.80985	0.999997	1283	0	0.53906	0.1902	0.18996	0.735882	564	1	0.53906
NonTargeting_Human_0522	1	0.81087	0.81078	0.999997	1284	0	0.60124	0.18913	0.18902	0.733848	562	1	0.60124
SPRN	15	0.81102	0.93249	0.999997	1285	2	0.31209	0.0064168	0.037922	0.597463	73	8	0.31209
NonTargeting_Human_0467	1	0.81112	0.81107	0.999997	1286	0	0.56849	0.18888	0.1888	0.733848	561	1	0.56849
CEP97	15	0.81129	0.93256	0.999997	1287	3	0.034375	0.37286	0.68547	0.953045	943	4	0.034375
NonTargeting_Human_0648	1	0.81136	0.81134	0.999997	1288	0	0.44541	0.18864	0.18856	0.733848	560	1	0.44541
NonTargeting_Human_0189	1	0.81153	0.81148	0.999997	1289	0	0.54206	0.18847	0.18842	0.733848	559	1	0.54206
NonTargeting_Human_0044	1	0.81177	0.8117	0.999997	1290	0	0.3585	0.18823	0.18812	0.733848	558	1	0.3585
NonTargeting_Human_0429	1	0.81407	0.81399	0.999997	1291	0	0.40644	0.18593	0.1857	0.73235	554	1	0.40644
NonTargeting_Human_0392	1	0.81604	0.81586	0.999997	1292	0	0.46367	0.18396	0.1838	0.729667	552	1	0.46367
NonTargeting_Human_0887	1	0.81628	0.8161	0.999997	1293	0	0.46549	0.18372	0.18361	0.729667	551	1	0.46549
SNAI1	15	0.81791	0.93498	0.999997	1294	3	0.16635	0.0032549	0.020828	0.496027	60	6	0.16635
NonTargeting_Human_0909	1	0.81792	0.81778	0.999997	1295	0	0.46213	0.18208	0.18204	0.726099	548	1	0.46213
NonTargeting_Human_0414	1	0.81817	0.81801	0.999997	1296	0	0.50604	0.18183	0.18183	0.726099	547	1	0.50604
NonTargeting_Human_0910	1	0.81866	0.81847	0.999997	1297	0	0.44593	0.18134	0.18134	0.726099	546	1	0.44593
NonTargeting_Human_0009	1	0.81907	0.81881	0.999997	1298	0	0.51093	0.18093	0.18087	0.726099	543	1	0.51093
NonTargeting_Human_0496	1	0.82006	0.81973	0.999997	1299	0	0.77943	0.17994	0.17995	0.726	541	1	0.77943
NonTargeting_Human_0190	1	0.82022	0.81992	0.999997	1300	0	0.46065	0.17978	0.17983	0.726	540	1	0.46065
NonTargeting_Human_0893	1	0.82071	0.82042	0.999997	1301	0	0.60121	0.17929	0.1794	0.726	539	1	0.60121
NonTargeting_Human_0460	1	0.82121	0.82097	0.999997	1302	0	0.75411	0.17879	0.17893	0.726	538	1	0.75411
C2orf49	15	0.82254	0.93668	0.999997	1303	3	0.078819	0.31921	0.62792	0.92966	829	3	0.078819
NonTargeting_Human_0457	1	0.82301	0.82275	0.999997	1304	0	0.5472	0.17699	0.17736	0.726	537	1	0.5472
MTHFD1	15	0.82308	0.93688	0.999997	1305	2	0.004732	0.48438	0.76859	0.998233	1101	4	0.004732
NonTargeting_Human_0581	1	0.82309	0.82285	0.999997	1306	0	0.5011	0.17691	0.17727	0.726	536	1	0.5011
NonTargeting_Human_0264	1	0.82342	0.82315	0.999997	1307	0	0.83491	0.17658	0.17689	0.726	534	1	0.83491
NonTargeting_Human_0532	1	0.82367	0.82345	0.999997	1308	0	0.45955	0.17633	0.1766	0.726	533	1	0.45955
NonTargeting_Human_0101	1	0.82383	0.8236	0.999997	1309	0	0.4574	0.17617	0.17642	0.726	532	1	0.4574
NonTargeting_Human_0125	1	0.824	0.82378	0.999997	1310	0	0.43165	0.176	0.17624	0.726	531	1	0.43165
MYLIP	15	0.82452	0.93737	0.999997	1311	3	0.33549	0.014667	0.073324	0.672205	110	9	0.33549
NonTargeting_Human_1000	1	0.82457	0.82441	0.999997	1312	0	0.40744	0.17543	0.17579	0.726	530	1	0.40744
NonTargeting_Human_0870	1	0.82514	0.825	0.999997	1313	0	0.58382	0.17486	0.17533	0.726	529	1	0.58382
NonTargeting_Human_0132	1	0.82531	0.82518	0.999997	1314	0	0.66882	0.17469	0.17518	0.726	528	1	0.66882
NonTargeting_Human_0381	1	0.82621	0.82603	0.999997	1315	0	0.52459	0.17379	0.17421	0.726	527	1	0.52459
NonTargeting_Human_0574	1	0.82637	0.82619	0.999997	1316	0	0.56147	0.17363	0.17401	0.726	525	1	0.56147
NonTargeting_Human_0719	1	0.82736	0.82704	0.999997	1317	0	0.39318	0.17264	0.17305	0.726	524	1	0.39318
NonTargeting_Human_0438	1	0.82744	0.82715	0.999997	1318	0	0.52107	0.17256	0.17296	0.726	523	1	0.52107
NonTargeting_Human_0216	1	0.8276	0.82735	0.999997	1319	0	0.78434	0.1724	0.17274	0.726	522	1	0.78434
GYG2	15	0.8277	0.93854	0.999997	1320	2	-0.094053	0.30907	0.61693	0.927683	809	3	-0.094053
NonTargeting_Human_0405	1	0.82785	0.82761	0.999997	1321	0	0.46247	0.17215	0.17251	0.726	521	1	0.46247
NonTargeting_Human_0165	1	0.82892	0.82862	0.999997	1322	0	0.4984	0.17108	0.17141	0.726	520	1	0.4984
NonTargeting_Human_0090	1	0.82949	0.82926	0.999997	1323	0	0.49904	0.17051	0.17086	0.726	518	1	0.49904
NonTargeting_Human_0528	1	0.8299	0.82963	0.999997	1324	0	0.48267	0.1701	0.17048	0.726	516	1	0.48267
NonTargeting_Human_0049	1	0.83064	0.83036	0.999997	1325	0	0.81523	0.16936	0.16984	0.726	515	1	0.81523
C1orf198	15	0.83088	0.93977	0.999997	1326	2	0.0089637	0.0071908	0.041778	0.599619	78	7	0.0089637
NonTargeting_Human_0231	1	0.83154	0.83127	0.999997	1327	0	0.36681	0.16846	0.16893	0.726	514	1	0.36681
NonTargeting_Human_0311	1	0.83212	0.83184	0.999997	1328	0	0.62776	0.16788	0.1683	0.726	513	1	0.62776
NonTargeting_Human_0923	1	0.83228	0.83203	0.999997	1329	0	0.55603	0.16772	0.16812	0.726	512	1	0.55603
NonTargeting_Human_0511	1	0.83302	0.83269	0.999997	1330	0	0.6818	0.16698	0.16739	0.726	511	1	0.6818
NonTargeting_Human_0903	1	0.83368	0.83331	0.999997	1331	0	0.67476	0.16632	0.16682	0.726	510	1	0.67476
NonTargeting_Human_0646	1	0.83384	0.83351	0.999997	1332	0	0.47154	0.16616	0.16671	0.726	509	1	0.47154
NonTargeting_Human_0091	1	0.83491	0.83462	0.999997	1333	0	0.46901	0.16509	0.16554	0.726	506	1	0.46901
NonTargeting_Human_0244	1	0.83507	0.83476	0.999997	1334	0	0.50171	0.16493	0.16544	0.726	504	1	0.50171
NonTargeting_Human_0704	1	0.83532	0.835	0.999997	1335	0	0.47593	0.16468	0.16522	0.726	502	1	0.47593
DROSHA	15	0.83534	0.94132	0.999997	1336	3	0.43921	0.10288	0.31748	0.823061	347	7	0.43921
NonTargeting_Human_0706	1	0.83581	0.83553	0.999997	1337	0	0.56628	0.16419	0.16467	0.726	501	1	0.56628
NonTargeting_Human_0461	1	0.83622	0.83594	0.999997	1338	0	0.39685	0.16378	0.16425	0.726	499	1	0.39685
NonTargeting_Human_0688	1	0.8363	0.83602	0.999997	1339	0	0.6716	0.1637	0.16419	0.726	498	1	0.6716
NAA38	15	0.83654	0.94174	0.999997	1340	2	0.050295	0.15186	0.40849	0.84923	471	5	0.050295
NonTargeting_Human_0503	1	0.83679	0.83659	0.999997	1341	0	0.62336	0.16321	0.16371	0.726	496	1	0.62336
NonTargeting_Human_0865	1	0.83811	0.83797	0.999997	1342	0	0.48133	0.16189	0.1625	0.726	495	1	0.48133
NonTargeting_Human_0138	1	0.83925	0.83915	0.999997	1343	0	0.46001	0.16075	0.16133	0.726	494	1	0.46001
NonTargeting_Human_0134	1	0.83942	0.83927	0.999997	1344	0	0.40103	0.16058	0.16114	0.726	493	1	0.40103
NonTargeting_Human_0218	1	0.83958	0.83946	0.999997	1345	0	0.48776	0.16042	0.161	0.726	492	1	0.48776
NonTargeting_Human_0766	1	0.83991	0.83988	0.999997	1346	0	0.55288	0.16009	0.16066	0.726	490	1	0.55288
PIP5K1A	15	0.83991	0.94298	0.999997	1347	2	0.39294	0.0024556	0.016214	0.479639	54	10	0.39294
NonTargeting_Human_0357	1	0.84081	0.84081	0.999997	1348	0	0.42787	0.15919	0.15976	0.726	489	1	0.42787
NonTargeting_Human_0238	1	0.84114	0.84117	0.999997	1349	0	0.69445	0.15886	0.15949	0.726	488	1	0.69445
HSPA8	15	0.84156	0.94357	0.999997	1350	3	0.44416	0.014973	0.074755	0.674977	113	9	0.44416
NonTargeting_Human_0362	1	0.84171	0.84172	0.999997	1351	0	0.8497	0.15829	0.15893	0.726	487	1	0.8497
RALA	15	0.84186	0.94364	0.999997	1352	2	0.079787	0.035692	0.14933	0.726	189	6	0.079787
NonTargeting_Human_0585	1	0.84204	0.84209	0.999997	1353	0	0.48799	0.15796	0.15853	0.726	486	1	0.48799
NonTargeting_Human_0390	1	0.84212	0.8422	0.999997	1354	0	1.4179	0.15788	0.15845	0.726	485	1	1.4179
CCDC178	15	0.84256	0.94393	0.999997	1355	3	0.13635	3.9536e-05	0.00037037	0.029478	22	5	0.13635
SMARCB1	15	0.84354	0.94438	0.999997	1356	3	0.17919	0.17661	0.45155	0.870282	535	6	0.17919
NonTargeting_Human_0081	1	0.84434	0.84431	0.999997	1357	0	0.84469	0.15566	0.15618	0.726	484	1	0.84469
NonTargeting_Human_0248	1	0.84442	0.8444	0.999997	1358	0	0.48708	0.15558	0.15611	0.726	483	1	0.48708
NonTargeting_Human_0512	1	0.84483	0.84477	0.999997	1359	0	0.58437	0.15517	0.15573	0.726	481	1	0.58437
TNFRSF8	15	0.84539	0.94514	0.999997	1360	1	0.31261	0.031563	0.13667	0.720819	176	8	0.31261
NonTargeting_Human_0485	1	0.84557	0.8456	0.999997	1361	0	0.70232	0.15443	0.15505	0.726	480	1	0.70232
NonTargeting_Human_0087	1	0.84582	0.84582	0.999997	1362	0	0.65488	0.15418	0.15488	0.726	479	1	0.65488
NonTargeting_Human_0611	1	0.8459	0.84591	0.999997	1363	0	0.54067	0.1541	0.15478	0.726	478	1	0.54067
NonTargeting_Human_0513	1	0.84737	0.84745	0.999997	1364	0	0.56234	0.15263	0.15336	0.726	475	1	0.56234
NonTargeting_Human_0069	1	0.8477	0.84774	0.999997	1365	0	0.44735	0.1523	0.153	0.726	473	1	0.44735
NonTargeting_Human_0765	1	0.84787	0.8479	0.999997	1366	0	0.51419	0.15213	0.15287	0.726	472	1	0.51419
FZD6	15	0.84792	0.94613	0.999997	1367	2	0.33771	0.054122	0.20247	0.746183	244	8	0.33771
NonTargeting_Human_0258	1	0.84836	0.84834	0.999997	1368	0	0.54304	0.15164	0.15238	0.726	469	1	0.54304
CACNA1A	15	0.84838	0.94635	0.999997	1369	2	0.28631	0.016861	0.082343	0.698662	124	9	0.28631
LAMTOR4	15	0.84936	0.94667	0.999997	1370	3	0.043739	0.75116	0.91491	0.999997	1447	3	0.043739
NonTargeting_Human_0020	1	0.85	0.84994	0.999997	1371	0	0.4046	0.15	0.15084	0.726	468	1	0.4046
NonTargeting_Human_0963	1	0.85025	0.85015	0.999997	1372	0	1.0027	0.14975	0.15057	0.726	467	1	1.0027
NonTargeting_Human_0629	1	0.85033	0.85022	0.999997	1373	0	0.53192	0.14967	0.15048	0.726	466	1	0.53192
CDK12	15	0.85035	0.94705	0.999997	1374	3	0.38886	0.015458	0.076762	0.68577	116	9	0.38886
NonTargeting_Human_0032	1	0.85066	0.85048	0.999997	1375	0	0.61484	0.14934	0.15016	0.726	464	1	0.61484
NonTargeting_Human_0708	1	0.85139	0.85121	0.999997	1376	0	0.87616	0.14861	0.14945	0.726	462	1	0.87616
UPP2	15	0.85152	0.94747	0.999997	1377	3	0.1485	0.21414	0.50573	0.881963	619	6	0.1485
NonTargeting_Human_0835	1	0.85213	0.85193	0.999997	1378	0	0.89251	0.14787	0.14871	0.726	461	1	0.89251
C10orf53	15	0.85242	0.94782	0.999997	1379	2	0.091097	0.28448	0.58932	0.913813	768	5	0.091097
NonTargeting_Human_0743	1	0.85271	0.85254	0.999997	1380	0	0.4859	0.14729	0.14816	0.726	460	1	0.4859
SLC12A9	15	0.85327	0.94824	0.999997	1381	2	0.24372	0.18775	0.46997	0.880124	557	7	0.24372
NonTargeting_Human_0977	1	0.85336	0.85317	0.999997	1382	0	0.61951	0.14664	0.14753	0.726	459	1	0.61951
COPS3	15	0.85393	0.9485	0.999997	1383	3	0.065139	0.4133	0.71669	0.975071	1002	5	0.065139
NonTargeting_Human_0341	1	0.85402	0.85375	0.999997	1384	0	0.43154	0.14598	0.14688	0.726	458	1	0.43154
NonTargeting_Human_0966	1	0.85484	0.85465	0.999997	1385	0	0.74066	0.14516	0.1461	0.726	457	1	0.74066
NonTargeting_Human_0176	1	0.85517	0.85496	0.999997	1386	0	0.52608	0.14483	0.14586	0.726	455	1	0.52608
NonTargeting_Human_0826	1	0.85533	0.85519	0.999997	1387	0	0.60964	0.14467	0.14571	0.726	454	1	0.60964
NonTargeting_Human_0939	1	0.85558	0.85555	0.999997	1388	0	0.94323	0.14442	0.14555	0.726	453	1	0.94323
GPR152	15	0.85561	0.94916	0.999997	1389	1	-0.037124	0.18132	0.45953	0.876513	545	3	-0.037124
NonTargeting_Human_0868	1	0.85574	0.85571	0.999997	1390	0	0.71942	0.14426	0.14539	0.726	452	1	0.71942
NonTargeting_Human_0897	1	0.85607	0.85607	0.999997	1391	0	0.51906	0.14393	0.14507	0.726	451	1	0.51906
NonTargeting_Human_0714	1	0.85615	0.85617	0.999997	1392	0	1.2155	0.14385	0.14499	0.726	450	1	1.2155
HIST1H2BF	15	0.8564	0.94947	0.999997	1393	3	0.56819	0.014621	0.073177	0.672205	109	9	0.56819
NonTargeting_Human_0297	1	0.85747	0.85754	0.999997	1394	0	0.38192	0.14253	0.14368	0.726	447	1	0.38192
PRR3	15	0.85782	0.95003	0.999997	1395	1	0.24019	0.11768	0.34554	0.825315	387	7	0.24019
NonTargeting_Human_0287	1	0.8582	0.85831	0.999997	1396	0	0.63389	0.1418	0.14294	0.726	446	1	0.63389
NonTargeting_Human_0721	1	0.85935	0.85939	0.999997	1397	0	0.75422	0.14065	0.14173	0.726	444	1	0.75422
EGFR	15	0.8596	0.95061	0.999997	1398	3	0.28231	0.035123	0.14744	0.726	186	8	0.28231
NonTargeting_Human_0502	1	0.85968	0.85966	0.999997	1399	0	0.44988	0.14032	0.14133	0.726	442	1	0.44988
CCL14	15	0.86044	0.95098	0.999997	1400	2	0.1302	0.7909	0.93204	0.999997	1497	3	0.1302
NonTargeting_Human_0029	1	0.8605	0.86056	0.999997	1401	0	0.64473	0.1395	0.14058	0.726	440	1	0.64473
STXBP5L	15	0.86077	0.95109	0.999997	1402	3	0.042979	0.22906	0.52418	0.88732	646	6	0.042979
NonTargeting_Human_0699	1	0.8614	0.86149	0.999997	1403	0	0.75691	0.1386	0.13974	0.726	439	1	0.75691
TRIM8	15	0.86289	0.95202	0.999997	1404	3	0.36455	0.0081479	0.046681	0.605757	83	9	0.36455
NonTargeting_Human_0185	1	0.86321	0.86325	0.999997	1405	0	0.58345	0.13679	0.13777	0.722254	438	1	0.58345
NonTargeting_Human_0960	1	0.86345	0.86354	0.999997	1406	0	0.66952	0.13655	0.13756	0.722254	437	1	0.66952
LACRT	15	0.86466	0.95277	0.999997	1407	3	0.05129	0.1703	0.44085	0.867685	517	6	0.05129
RDH14	15	0.86495	0.9529	0.999997	1408	3	0.29981	0.033945	0.14402	0.726	180	8	0.29981
NonTargeting_Human_0592	1	0.86534	0.86531	0.999997	1409	0	0.42845	0.13466	0.13565	0.719757	434	1	0.42845
NonTargeting_Human_0254	1	0.8655	0.86551	0.999997	1410	0	0.65715	0.1345	0.13553	0.719757	433	1	0.65715
NonTargeting_Human_0016	1	0.86567	0.86568	0.999997	1411	0	0.69232	0.13433	0.13535	0.719757	431	1	0.69232
DDX27	15	0.86612	0.9534	0.999997	1412	3	0.22355	0.074732	0.25724	0.77868	291	7	0.22355
NonTargeting_Human_0037	1	0.86624	0.86622	0.999997	1413	0	0.58771	0.13376	0.13479	0.719757	429	1	0.58771
NonTargeting_Human_0168	1	0.86649	0.86643	0.999997	1414	0	0.73059	0.13351	0.13457	0.719757	427	1	0.73059
MSI2	15	0.86685	0.95363	0.999997	1415	3	-0.023487	0.90651	0.97051	0.999997	1616	1	-0.023487
NonTargeting_Human_0653	1	0.8669	0.86687	0.999997	1416	0	0.59003	0.1331	0.13422	0.719757	426	1	0.59003
SRGAP2	15	0.8669	0.95364	0.999997	1417	2	0.23155	0.16017	0.42369	0.856413	491	7	0.23155
NonTargeting_Human_0599	1	0.86715	0.86713	0.999997	1418	0	0.56337	0.13285	0.13403	0.719757	425	1	0.56337
NonTargeting_Human_0398	1	0.86731	0.86731	0.999997	1419	0	0.59955	0.13269	0.13382	0.719757	424	1	0.59955
TMOD2	15	0.86779	0.95403	0.999997	1420	2	0.34932	0.025115	0.11444	0.70065	157	9	0.34932
NonTargeting_Human_0476	1	0.86846	0.86834	0.999997	1421	0	0.71302	0.13154	0.1326	0.719757	423	1	0.71302
NonTargeting_Human_0849	1	0.86969	0.86944	0.999997	1422	0	0.53748	0.13031	0.13127	0.719291	420	1	0.53748
NonTargeting_Human_0965	1	0.86985	0.86961	0.999997	1423	0	0.78805	0.13015	0.13106	0.719291	418	1	0.78805
NonTargeting_Human_0337	1	0.87018	0.86997	0.999997	1424	0	0.4457	0.12982	0.13085	0.719291	415	1	0.4457
DCAF4	15	0.87042	0.95524	0.999997	1425	1	0.37014	0.023997	0.11015	0.70065	147	8	0.37014
NonTargeting_Human_0751	1	0.87158	0.87137	0.999997	1426	0	0.99669	0.12842	0.12945	0.717305	413	1	0.99669
NonTargeting_Human_0270	1	0.87166	0.87145	0.999997	1427	0	0.45624	0.12834	0.12938	0.717305	412	1	0.45624
NonTargeting_Human_0510	1	0.87207	0.87187	0.999997	1428	0	0.56407	0.12793	0.12889	0.717305	411	1	0.56407
NonTargeting_Human_0235	1	0.87231	0.8721	0.999997	1429	0	0.53122	0.12769	0.12862	0.717305	409	1	0.53122
NonTargeting_Human_0378	1	0.87297	0.8727	0.999997	1430	0	0.69647	0.12703	0.1281	0.717305	408	1	0.69647
NXF2	14	0.87315	0.95377	0.999997	1431	2	0.30765	0.025518	0.11161	0.70065	160	7	0.30765
NonTargeting_Human_0833	1	0.87486	0.87466	0.999997	1432	0	0.63037	0.12514	0.12631	0.711136	406	1	0.63037
SPATA25	15	0.87562	0.95757	0.999997	1433	1	0.073596	0.13014	0.36936	0.831058	417	7	0.073596
TCP10	15	0.87573	0.95762	0.999997	1434	3	0.10619	0.53067	0.80131	0.999997	1176	3	0.10619
NonTargeting_Human_0854	1	0.87642	0.87615	0.999997	1435	0	0.76925	0.12358	0.12481	0.704966	404	1	0.76925
NonTargeting_Human_0358	1	0.87683	0.87651	0.999997	1436	0	0.60138	0.12317	0.12444	0.704966	403	1	0.60138
SNAPC2	15	0.87702	0.95816	0.999997	1437	1	0.50288	8.9638e-05	0.00081142	0.052622	26	12	0.50288
NonTargeting_Human_0705	1	0.87724	0.877	0.999997	1438	0	0.40325	0.12276	0.12401	0.704966	402	1	0.40325
NonTargeting_Human_0484	1	0.87732	0.87711	0.999997	1439	0	0.59934	0.12268	0.12392	0.704966	401	1	0.59934
NonTargeting_Human_0471	1	0.87773	0.87751	0.999997	1440	0	0.52749	0.12227	0.12341	0.704966	400	1	0.52749
NonTargeting_Human_0111	1	0.8783	0.87803	0.999997	1441	0	0.5201	0.1217	0.12284	0.704966	399	1	0.5201
hsa-mir-6508	8	0.8786	0.90358	0.999997	1442	1	0.029968	0.47958	0.69133	0.958448	1095	3	0.029968
NonTargeting_Human_0062	1	0.87871	0.87845	0.999997	1443	0	0.57759	0.12129	0.12242	0.704966	398	1	0.57759
NonTargeting_Human_0548	1	0.87904	0.87881	0.999997	1444	0	0.73468	0.12096	0.12211	0.704966	397	1	0.73468
NonTargeting_Human_0209	1	0.87912	0.87888	0.999997	1445	0	0.80408	0.12088	0.12204	0.704966	396	1	0.80408
DDX52	15	0.8794	0.95913	0.999997	1446	3	0.27836	0.16519	0.43227	0.86065	507	6	0.27836
NonTargeting_Human_0819	1	0.87961	0.87943	0.999997	1447	0	0.45136	0.12039	0.1216	0.704966	395	1	0.45136
hsa-mir-1908	15	0.88011	0.95951	0.999997	1448	2	0.37876	0.01365	0.069485	0.668507	105	8	0.37876
NonTargeting_Human_0289	1	0.88093	0.88076	0.999997	1449	0	0.79874	0.11907	0.12031	0.704966	393	1	0.79874
NonTargeting_Human_0354	1	0.88101	0.88087	0.999997	1450	0	0.59438	0.11899	0.12022	0.704966	391	1	0.59438
RAB13	15	0.88113	0.95995	0.999997	1451	2	0.18134	0.46063	0.75155	0.993174	1070	5	0.18134
KCNK4	15	0.88195	0.96029	0.999997	1452	2	0.25748	0.069264	0.24354	0.77868	278	8	0.25748
G6PC	15	0.8823	0.96043	0.999997	1453	2	0.15351	0.072337	0.25119	0.77868	287	6	0.15351
NonTargeting_Human_0021	1	0.88257	0.88253	0.999997	1454	0	0.52325	0.11743	0.11863	0.704966	386	1	0.52325
METAP1D	15	0.88271	0.96059	0.999997	1455	3	0.21246	0.32998	0.64004	0.935491	850	6	0.21246
ARIH1	15	0.88297	0.96069	0.999997	1456	1	0.014794	0.48719	0.77066	0.998233	1107	5	0.014794
NonTargeting_Human_0935	1	0.88298	0.88289	0.999997	1457	0	0.6807	0.11702	0.11815	0.704966	384	1	0.6807
NonTargeting_Human_0269	1	0.88314	0.88303	0.999997	1458	0	0.45157	0.11686	0.11802	0.704966	383	1	0.45157
NonTargeting_Human_0561	1	0.88372	0.88358	0.999997	1459	0	0.5784	0.11628	0.1174	0.704966	382	1	0.5784
KCNK12	15	0.88493	0.96154	0.999997	1460	3	0.14018	0.19273	0.4779	0.881963	569	7	0.14018
NonTargeting_Human_0781	1	0.88593	0.8861	0.999997	1461	0	0.68503	0.11407	0.11524	0.70065	379	1	0.68503
NonTargeting_Human_0462	1	0.8861	0.88635	0.999997	1462	0	0.76358	0.1139	0.11508	0.70065	378	1	0.76358
NonTargeting_Human_0023	1	0.88683	0.88701	0.999997	1463	0	0.59177	0.11317	0.11437	0.70065	376	1	0.59177
NonTargeting_Human_0713	1	0.88708	0.88725	0.999997	1464	0	0.69758	0.11292	0.1141	0.70065	375	1	0.69758
MORC2	15	0.88722	0.96241	0.999997	1465	2	0.29578	0.016484	0.080907	0.695763	120	8	0.29578
NonTargeting_Human_0410	1	0.88823	0.88845	0.999997	1466	0	1.1552	0.11177	0.11309	0.70065	373	1	1.1552
NonTargeting_Human_0103	1	0.88847	0.88867	0.999997	1467	0	0.56084	0.11153	0.1128	0.70065	372	1	0.56084
NonTargeting_Human_0900	1	0.88954	0.88977	0.999997	1468	0	0.62215	0.11046	0.11177	0.70065	370	1	0.62215
NonTargeting_Human_0034	1	0.88962	0.88983	0.999997	1469	0	0.71168	0.11038	0.11168	0.70065	368	1	0.71168
ANO8	15	0.88976	0.96339	0.999997	1470	2	0.017134	0.25532	0.55548	0.906467	697	5	0.017134
NonTargeting_Human_0094	1	0.89011	0.89026	0.999997	1471	0	0.59388	0.10989	0.11129	0.70065	367	1	0.59388
NonTargeting_Human_0274	1	0.89077	0.89092	0.999997	1472	0	0.8359	0.10923	0.11066	0.70065	366	1	0.8359
NonTargeting_Human_0041	1	0.89143	0.89169	0.999997	1473	0	0.53257	0.10857	0.10989	0.70065	365	1	0.53257
KLC2	15	0.89178	0.96424	0.999997	1474	1	0.52612	0.0080831	0.046392	0.605757	82	9	0.52612
ARL8A	15	0.89248	0.96454	0.999997	1475	3	0.28903	0.016291	0.080172	0.695763	119	8	0.28903
NonTargeting_Human_0338	1	0.89282	0.89307	0.999997	1476	0	0.9177	0.10718	0.1084	0.70065	363	1	0.9177
NonTargeting_Human_0172	1	0.89315	0.89339	0.999997	1477	0	0.8221	0.10685	0.10807	0.70065	362	1	0.8221
MRPL33	15	0.89333	0.96488	0.999997	1478	3	-0.086442	0.31051	0.61855	0.928032	812	6	-0.086442
RPL41	7	0.89356	0.89918	0.999997	1479	1	0.31337	0.044769	0.14263	0.726	216	4	0.31337
NonTargeting_Human_0059	1	0.89372	0.89406	0.999997	1480	0	0.82034	0.10628	0.1074	0.70065	361	1	0.82034
NonTargeting_Human_0373	1	0.89381	0.89412	0.999997	1481	0	0.47374	0.10619	0.10731	0.70065	360	1	0.47374
DDX4	15	0.89382	0.96505	0.999997	1482	3	-0.0075411	0.77754	0.92742	0.999997	1478	2	-0.0075411
ZNF124	15	0.89394	0.9651	0.999997	1483	3	-0.063917	0.48142	0.76653	0.998233	1098	5	-0.063917
NonTargeting_Human_0842	1	0.89397	0.8942	0.999997	1484	0	0.72961	0.10603	0.10721	0.70065	359	1	0.72961
NonTargeting_Human_0840	1	0.8943	0.8946	0.999997	1485	0	0.51098	0.1057	0.1069	0.70065	358	1	0.51098
GTPBP5	15	0.8943	0.96523	0.999997	1486	3	0.10781	0.28481	0.58973	0.913813	770	6	0.10781
NonTargeting_Human_0687	1	0.89438	0.89467	0.999997	1487	0	0.51837	0.10562	0.10682	0.70065	357	1	0.51837
NonTargeting_Human_0627	1	0.89479	0.89507	0.999997	1488	0	0.72511	0.10521	0.10634	0.70065	356	1	0.72511
AGAP4	15	0.89498	0.96545	0.999997	1489	2	0.1323	0.14009	0.38737	0.838604	441	5	0.1323
NonTargeting_Human_0982	1	0.89512	0.89541	0.999997	1490	0	1.1588	0.10488	0.10602	0.70065	355	1	1.1588
WDR82	15	0.89513	0.9655	0.999997	1491	2	0.45194	0.0029689	0.018957	0.481059	59	8	0.45194
VPS51	15	0.89543	0.96559	0.999997	1492	2	0.31396	0.064681	0.23129	0.777323	266	8	0.31396
NonTargeting_Human_0520	1	0.89569	0.896	0.999997	1493	0	0.8636	0.10431	0.10547	0.70065	352	1	0.8636
NonTargeting_Human_0902	1	0.89602	0.89629	0.999997	1494	0	0.61843	0.10398	0.10509	0.70065	351	1	0.61843
NonTargeting_Human_0282	1	0.89627	0.89653	0.999997	1495	0	0.69139	0.10373	0.10487	0.70065	350	1	0.69139
NonTargeting_Human_0996	1	0.89684	0.89711	0.999997	1496	0	2.5367	0.10316	0.10431	0.70065	349	1	2.5367
NonTargeting_Human_0600	1	0.89733	0.89759	0.999997	1497	0	0.59775	0.10267	0.10385	0.70065	346	1	0.59775
NonTargeting_Human_0702	1	0.89783	0.8981	0.999997	1498	0	0.71875	0.10217	0.10331	0.70065	344	1	0.71875
MED9	15	0.89809	0.96634	0.999997	1499	2	-0.078492	0.25232	0.55189	0.904129	687	5	-0.078492
NonTargeting_Human_0384	1	0.8984	0.89866	0.999997	1500	0	0.54422	0.1016	0.10276	0.70065	343	1	0.54422
NonTargeting_Human_0830	1	0.89856	0.89884	0.999997	1501	0	0.76269	0.10144	0.10259	0.70065	342	1	0.76269
NonTargeting_Human_0232	1	0.89955	0.89986	0.999997	1502	0	0.68088	0.10045	0.1016	0.70065	341	1	0.68088
NonTargeting_Human_0756	1	0.90021	0.90069	0.999997	1503	0	0.54799	0.099795	0.10078	0.70065	339	1	0.54799
ABCG5	15	0.90036	0.96688	0.999997	1504	2	0.13566	0.069418	0.24395	0.77868	279	7	0.13566
SIRT5	15	0.90097	0.96703	0.999997	1505	2	0.19349	0.085358	0.28237	0.797469	305	7	0.19349
NonTargeting_Human_0867	1	0.90119	0.90173	0.999997	1506	0	0.7305	0.098811	0.099787	0.70065	337	1	0.7305
ZBTB37	15	0.90126	0.96712	0.999997	1507	2	0.23352	0.29207	0.59797	0.916188	785	6	0.23352
NonTargeting_Human_0843	1	0.90135	0.90185	0.999997	1508	0	0.55074	0.098646	0.099612	0.70065	336	1	0.55074
NonTargeting_Human_0370	1	0.90144	0.90193	0.999997	1509	0	0.57549	0.098564	0.09951	0.70065	335	1	0.57549
NonTargeting_Human_0323	1	0.90193	0.90238	0.999997	1510	0	0.78576	0.098072	0.098917	0.70065	334	1	0.78576
NonTargeting_Human_0031	1	0.90283	0.90324	0.999997	1511	0	0.74249	0.09717	0.097955	0.70065	331	1	0.74249
NonTargeting_Human_0813	1	0.90299	0.90341	0.999997	1512	0	0.78139	0.097006	0.09778	0.70065	330	1	0.78139
NonTargeting_Human_0333	1	0.9034	0.90381	0.999997	1513	0	0.69537	0.096596	0.097362	0.70065	329	1	0.69537
NonTargeting_Human_0858	1	0.90349	0.90387	0.999997	1514	0	0.85393	0.096514	0.097305	0.70065	328	1	0.85393
NonTargeting_Human_0906	1	0.90365	0.90402	0.999997	1515	0	0.60475	0.096349	0.097118	0.70065	327	1	0.60475
NonTargeting_Human_0550	1	0.90373	0.90415	0.999997	1516	0	0.73315	0.096267	0.097022	0.70065	326	1	0.73315
NonTargeting_Human_0043	1	0.90414	0.90452	0.999997	1517	0	0.48658	0.095857	0.096655	0.70065	325	1	0.48658
NonTargeting_Human_0302	1	0.90562	0.90599	0.999997	1518	0	0.6363	0.094381	0.095207	0.70065	324	1	0.6363
NonTargeting_Human_0797	1	0.90611	0.90648	0.999997	1519	0	0.85491	0.093888	0.094676	0.70065	323	1	0.85491
NonTargeting_Human_0916	1	0.90652	0.90685	0.999997	1520	0	0.71478	0.093478	0.094274	0.70065	322	1	0.71478
NonTargeting_Human_0896	1	0.9071	0.90747	0.999997	1521	0	0.67252	0.092904	0.093601	0.70065	321	1	0.67252
NonTargeting_Human_0834	1	0.90783	0.90821	0.999997	1522	0	0.91461	0.092166	0.0929	0.70065	318	1	0.91461
NonTargeting_Human_0129	1	0.90808	0.90847	0.999997	1523	0	0.95259	0.09192	0.092668	0.70065	317	1	0.95259
CHP1	15	0.90878	0.96866	0.999997	1524	2	1.2847	6.0386e-13	2.8272e-06	0.000291	6	13	1.2847
NonTargeting_Human_0828	1	0.90964	0.91001	0.999997	1525	0	2.6126	0.090361	0.091023	0.70065	314	1	2.6126
USP50	15	0.90982	0.96889	0.999997	1526	1	0.092267	0.27681	0.58053	0.913193	754	6	0.092267
EFCAB5	15	0.90995	0.96893	0.999997	1527	1	0.1771	0.2357	0.53196	0.893059	657	6	0.1771
NonTargeting_Human_0664	1	0.9103	0.91057	0.999997	1528	0	0.63677	0.089705	0.090339	0.70065	313	1	0.63677
NonTargeting_Human_0644	1	0.91095	0.91118	0.999997	1529	0	0.79349	0.089048	0.089677	0.70065	311	1	0.79349
WDR33	15	0.91201	0.96935	0.999997	1530	1	0.28127	0.26866	0.57087	0.909598	740	6	0.28127
NonTargeting_Human_0418	1	0.91243	0.91274	0.999997	1531	0	0.88052	0.087572	0.088269	0.70065	309	1	0.88052
NonTargeting_Human_0736	1	0.91317	0.91348	0.999997	1532	0	0.64623	0.086833	0.087495	0.699557	308	1	0.64623
NonTargeting_Human_0217	1	0.91333	0.91361	0.999997	1533	0	0.85234	0.086669	0.08737	0.699557	306	1	0.85234
KIAA1432	15	0.91365	0.96976	0.999997	1534	1	0.86152	2.2609e-05	0.0002177	0.018152	21	12	0.86152
ISG20	15	0.9138	0.96977	0.999997	1535	2	0.080292	0.21458	0.5063	0.881963	621	6	0.080292
NonTargeting_Human_0676	1	0.91473	0.91503	0.999997	1536	0	1.001	0.085275	0.086137	0.699189	304	1	1.001
PRR20A	15	0.91499	0.97007	0.999997	1537	2	0.24142	0.16339	0.42912	0.860113	497	7	0.24142
NonTargeting_Human_0755	1	0.91509	0.91536	0.999997	1538	0	1.1676	0.084906	0.085759	0.699189	303	1	1.1676
NonTargeting_Human_0986	1	0.91571	0.91585	0.999997	1539	0	0.65935	0.08429	0.08525	0.699189	302	1	0.65935
FBXL5	15	0.91575	0.97024	0.999997	1540	1	0.18586	0.50885	0.78603	0.999997	1140	5	0.18586
NonTargeting_Human_0131	1	0.91637	0.9166	0.999997	1541	0	0.73376	0.083634	0.084605	0.699189	301	1	0.73376
NonTargeting_Human_0447	1	0.91678	0.91703	0.999997	1542	0	0.84417	0.083224	0.084215	0.699189	300	1	0.84417
NonTargeting_Human_0195	1	0.9171	0.91749	0.999997	1543	0	0.7343	0.082896	0.083876	0.699189	299	1	0.7343
NonTargeting_Human_0881	1	0.91858	0.91887	0.999997	1544	0	1.0913	0.081419	0.082456	0.698662	298	1	1.0913
NonTargeting_Human_0431	1	0.91998	0.92025	0.999997	1545	0	0.97321	0.080025	0.080952	0.695763	297	1	0.97321
NonTargeting_Human_0126	1	0.92014	0.92042	0.999997	1546	0	0.94213	0.079861	0.080794	0.695763	296	1	0.94213
NonTargeting_Human_0908	1	0.92194	0.92216	0.999997	1547	0	1.061	0.078056	0.078951	0.694686	294	1	1.061
NonTargeting_Human_0077	1	0.92211	0.92234	0.999997	1548	0	0.63909	0.077892	0.078747	0.694686	293	1	0.63909
SULT6B1	15	0.9228	0.97182	0.999997	1549	1	0.17485	0.37932	0.69027	0.95774	952	5	0.17485
NonTargeting_Human_0292	1	0.92285	0.92307	0.999997	1550	0	0.92203	0.077153	0.077989	0.693195	292	1	0.92203
NonTargeting_Human_0607	1	0.92859	0.9286	0.999997	1551	0	1.4484	0.071411	0.07208	0.671345	286	1	1.4484
NonTargeting_Human_0036	1	0.92925	0.92931	0.999997	1552	0	0.86858	0.070755	0.071458	0.669111	284	1	0.86858
NonTargeting_Human_0320	1	0.92949	0.92956	0.999997	1553	0	1.0406	0.070509	0.071181	0.669111	282	1	1.0406
NonTargeting_Human_0518	1	0.92982	0.92983	0.999997	1554	0	0.90063	0.07018	0.070757	0.669111	281	1	0.90063
HNRNPM	15	0.93114	0.97394	0.999997	1555	2	0.13348	0.0015414	0.011029	0.364375	52	6	0.13348
VHL	15	0.93124	0.97396	0.999997	1556	2	1.2931	3.1792e-12	2.8272e-06	0.000291	7	11	1.2931
NonTargeting_Human_0832	1	0.93138	0.93135	0.999997	1557	0	0.70031	0.068622	0.069123	0.668507	276	1	0.70031
hsa-mir-1229	15	0.9315	0.97404	0.999997	1558	2	0.095945	0.31443	0.62284	0.92966	818	5	0.095945
NonTargeting_Human_0711	1	0.93171	0.93169	0.999997	1559	0	0.91162	0.068294	0.068773	0.668507	274	1	0.91162
NonTargeting_Human_0806	1	0.93179	0.93176	0.999997	1560	0	0.78149	0.068212	0.068705	0.668507	273	1	0.78149
NonTargeting_Human_0142	1	0.9322	0.93213	0.999997	1561	0	0.76038	0.067801	0.06832	0.668507	272	1	0.76038
PGM1	15	0.93284	0.97442	0.999997	1562	1	0.19173	0.18115	0.45931	0.876513	544	7	0.19173
NonTargeting_Human_0086	1	0.93425	0.93408	0.999997	1563	0	0.64292	0.065751	0.066341	0.663791	268	1	0.64292
NonTargeting_Human_0355	1	0.9345	0.93426	0.999997	1564	0	0.83259	0.065505	0.06607	0.663791	267	1	0.83259
TBPL2	14	0.93612	0.97217	0.999997	1565	1	0.23553	0.1518	0.4058	0.847923	470	6	0.23553
NonTargeting_Human_0557	1	0.93663	0.93633	0.999997	1566	0	0.80255	0.063372	0.063893	0.658096	265	1	0.80255
NonTargeting_Human_0475	1	0.93696	0.93669	0.999997	1567	0	1.0564	0.063043	0.063537	0.658096	264	1	1.0564
NonTargeting_Human_0239	1	0.93835	0.93806	0.999997	1568	0	0.85984	0.061649	0.062196	0.657551	261	1	0.85984
NonTargeting_Human_0504	1	0.93843	0.9382	0.999997	1569	0	0.92414	0.061567	0.062134	0.657551	260	1	0.92414
NonTargeting_Human_0224	1	0.93852	0.93827	0.999997	1570	0	0.92468	0.061485	0.062072	0.657551	259	1	0.92468
NonTargeting_Human_0591	1	0.93884	0.93853	0.999997	1571	0	0.92213	0.061157	0.061778	0.657551	258	1	0.92213
SLC35F5	15	0.93899	0.97611	0.999997	1572	1	0.23325	0.15301	0.41058	0.849794	476	7	0.23325
NonTargeting_Human_0777	1	0.93917	0.93888	0.999997	1573	0	1.2639	0.060829	0.061416	0.657551	256	1	1.2639
NonTargeting_Human_0774	1	0.93942	0.93912	0.999997	1574	0	1.0308	0.060582	0.061207	0.657551	255	1	1.0308
KRTAP4-2	15	0.93962	0.97627	0.999997	1575	2	0.070652	0.14091	0.38895	0.838737	445	5	0.070652
ADAMTSL1	15	0.94174	0.97681	0.999997	1576	1	0.2078	0.16495	0.43178	0.86065	505	7	0.2078
NonTargeting_Human_0841	1	0.94241	0.9422	0.999997	1577	0	1.2332	0.057588	0.058153	0.657551	250	1	1.2332
ZNF548	15	0.94322	0.97728	0.999997	1578	2	0.13321	0.030908	0.13459	0.719757	172	6	0.13321
NonTargeting_Human_0205	1	0.94434	0.94401	0.999997	1579	0	0.92307	0.05566	0.056146	0.655413	248	1	0.92307
ICA1L	15	0.94464	0.97775	0.999997	1580	2	-0.10516	0.043184	0.17187	0.726	209	5	-0.10516
NonTargeting_Human_0738	1	0.94549	0.94517	0.999997	1581	0	1.4124	0.054512	0.054896	0.648914	246	1	1.4124
SRP9	15	0.94584	0.97805	0.999997	1582	1	0.39021	0.052608	0.19816	0.739172	241	8	0.39021
PACRGL	15	0.94669	0.97823	0.999997	1583	2	0.34785	0.0013391	0.0096889	0.339307	49	11	0.34785
ALG13	15	0.9468	0.97824	0.999997	1584	2	0.4025	0.015203	0.075598	0.678827	115	9	0.4025
NonTargeting_Human_0247	1	0.94705	0.94675	0.999997	1585	0	0.87498	0.052953	0.053438	0.636526	242	1	0.87498
CDH1	15	0.94719	0.97836	0.999997	1586	2	0.36599	0.024188	0.11081	0.70065	149	8	0.36599
NonTargeting_Human_0926	1	0.94787	0.94753	0.999997	1587	0	1.7156	0.052133	0.052765	0.632816	240	1	1.7156
NonTargeting_Human_0284	1	0.94836	0.94808	0.999997	1588	0	0.72198	0.051641	0.052318	0.631786	238	1	0.72198
DAZ1	15	0.94922	0.97905	0.999997	1589	1	0.37063	0.043858	0.17377	0.726	212	8	0.37063
NonTargeting_Human_0210	1	0.94967	0.94938	0.999997	1590	0	0.82875	0.050328	0.051012	0.62029	237	1	0.82875
ASB16	15	0.94982	0.97921	0.999997	1591	2	0.30829	0.012395	0.064453	0.658214	99	8	0.30829
NonTargeting_Human_0678	1	0.95025	0.95001	0.999997	1592	0	1.1944	0.049754	0.050537	0.62029	235	1	1.1944
NonTargeting_Human_0749	1	0.95033	0.95007	0.999997	1593	0	1.1106	0.049672	0.050418	0.62029	234	1	1.1106
NonTargeting_Human_0817	1	0.95098	0.95072	0.999997	1594	0	1.0173	0.049016	0.049728	0.62029	233	1	1.0173
NonTargeting_Human_0361	1	0.95115	0.95088	0.999997	1595	0	0.87522	0.048852	0.049519	0.62029	231	1	0.87522
LYZ	15	0.95211	0.98	0.999997	1596	2	-0.066578	0.89514	0.96612	0.999997	1603	3	-0.066578
NonTargeting_Human_0855	1	0.95221	0.95196	0.999997	1597	0	1.0296	0.047785	0.0484	0.618595	228	1	1.0296
CNOT2	15	0.9529	0.98027	0.999997	1598	1	0.57558	0.00017043	0.00149	0.086964	29	11	0.57558
NonTargeting_Human_0093	1	0.95312	0.95279	0.999997	1599	0	0.87574	0.046883	0.047359	0.609748	226	1	0.87574
NonTargeting_Human_0300	1	0.95377	0.95347	0.999997	1600	0	1.1058	0.046226	0.046703	0.605757	224	1	1.1058
ZFAND1	15	0.95381	0.98061	0.999997	1601	1	0.42142	0.00020028	0.0017161	0.093905	31	12	0.42142
NonTargeting_Human_0638	1	0.95402	0.95369	0.999997	1602	0	0.97473	0.04598	0.046432	0.605757	222	1	0.97473
NonTargeting_Human_0937	1	0.95459	0.95425	0.999997	1603	0	0.8049	0.045406	0.045889	0.605757	219	1	0.8049
NonTargeting_Human_0837	1	0.95468	0.95433	0.999997	1604	0	1.0452	0.045324	0.045844	0.605757	217	1	1.0452
NonTargeting_Human_0046	1	0.95525	0.95484	0.999997	1605	0	1.2943	0.04475	0.045256	0.605757	215	1	1.2943
NonTargeting_Human_0944	1	0.95582	0.95546	0.999997	1606	0	0.74291	0.044176	0.044668	0.605757	214	1	0.74291
MED27	15	0.95613	0.98155	0.999997	1607	1	0.20557	0.091498	0.29495	0.803802	315	7	0.20557
NonTargeting_Human_0750	1	0.95623	0.95595	0.999997	1608	0	1.8744	0.043765	0.044181	0.605757	210	1	1.8744
TNFAIP3	15	0.95646	0.98165	0.999997	1609	2	0.29905	0.026395	0.11928	0.704966	162	8	0.29905
CTCF	15	0.95663	0.98172	0.999997	1610	2	0.31068	0.003371	0.021467	0.496027	61	8	0.31068
AIM1	15	0.95705	0.98187	0.999997	1611	2	0.29433	0.014945	0.074597	0.674977	111	9	0.29433
NonTargeting_Human_0193	1	0.95705	0.95686	0.999997	1612	0	0.89201	0.042945	0.043418	0.605757	208	1	0.89201
CAPZA1	15	0.95805	0.98221	0.999997	1613	2	0.15634	0.33704	0.64758	0.938387	868	4	0.15634
NonTargeting_Human_0674	1	0.95894	0.9587	0.999997	1614	0	0.85893	0.041058	0.041303	0.597701	204	1	0.85893
NonTargeting_Human_0229	1	0.95919	0.95894	0.999997	1615	0	0.62272	0.040812	0.04102	0.597701	203	1	0.62272
NonTargeting_Human_0489	1	0.95935	0.95912	0.999997	1616	0	1.0571	0.040648	0.040896	0.597701	202	1	1.0571
ANXA13	15	0.95943	0.98268	0.999997	1617	2	0.40263	0.037754	0.15542	0.726	194	8	0.40263
NonTargeting_Human_0917	1	0.96001	0.95979	0.999997	1618	0	0.88008	0.039992	0.040246	0.597701	200	1	0.88008
NonTargeting_Human_0491	1	0.96009	0.95988	0.999997	1619	0	1.1714	0.03991	0.040172	0.597701	199	1	1.1714
NonTargeting_Human_0668	1	0.96025	0.96001	0.999997	1620	0	1.0582	0.039746	0.040042	0.597701	197	1	1.0582
NonTargeting_Human_0115	1	0.96034	0.9601	0.999997	1621	0	0.98812	0.039664	0.039986	0.597701	196	1	0.98812
NonTargeting_Human_0119	1	0.96337	0.96331	0.999997	1622	0	0.89873	0.036628	0.036881	0.59247	191	1	0.89873
DYNLL1	15	0.96375	0.98446	0.999997	1623	1	0.77548	0.00012009	0.0010659	0.064356	28	11	0.77548
ABCB4	15	0.96395	0.98455	0.999997	1624	2	0.35227	0.020004	0.095111	0.70065	137	9	0.35227
MDH1	15	0.96402	0.98459	0.999997	1625	1	0.14161	0.058354	0.21414	0.757486	252	7	0.14161
NonTargeting_Human_0715	1	0.96403	0.96401	0.999997	1626	0	1.1242	0.035972	0.036107	0.590867	190	1	1.1242
NonTargeting_Human_0272	1	0.96436	0.96433	0.999997	1627	0	1.0834	0.035644	0.035796	0.590867	188	1	1.0834
NonTargeting_Human_0972	1	0.96485	0.96478	0.999997	1628	0	1.3912	0.035152	0.035258	0.587977	187	1	1.3912
NonTargeting_Human_0488	1	0.96493	0.96483	0.999997	1629	0	0.86363	0.03507	0.035185	0.587977	185	1	0.86363
PPM1A	15	0.96527	0.98514	0.999997	1630	1	0.33919	0.0013908	0.010023	0.344108	50	11	0.33919
NonTargeting_Human_0827	1	0.96534	0.9653	0.999997	1631	0	1.2879	0.03466	0.034755	0.587977	184	1	1.2879
NonTargeting_Human_0146	1	0.96559	0.96549	0.999997	1632	0	0.88814	0.034413	0.034495	0.587977	182	1	0.88814
NonTargeting_Human_0413	1	0.96575	0.96562	0.999997	1633	0	1.2457	0.034249	0.034326	0.587977	181	1	1.2457
NonTargeting_Human_0746	1	0.96657	0.96653	0.999997	1634	0	1.3308	0.033429	0.033562	0.587673	179	1	1.3308
PGM3	15	0.96699	0.98579	0.999997	1635	2	-0.02503	0.26463	0.56612	0.909598	729	4	-0.02503
FRG2C	15	0.9674	0.98605	0.999997	1636	1	0.48424	0.0029336	0.018787	0.481059	58	8	0.48424
RALGAPA1	15	0.96779	0.98619	0.999997	1637	2	-0.0049549	0.67175	0.87836	0.999997	1370	3	-0.0049549
CLEC3B	15	0.96788	0.98623	0.999997	1638	2	0.2447	0.099945	0.31193	0.821343	340	6	0.2447
GALR1	15	0.96805	0.98631	0.999997	1639	1	0.14146	0.192	0.47683	0.881963	566	4	0.14146
NonTargeting_Human_0583	1	0.96821	0.96816	0.999997	1640	0	1.519	0.031788	0.031871	0.563706	177	1	1.519
NonTargeting_Human_0899	1	0.96854	0.96846	0.999997	1641	0	1.5932	0.03146	0.031583	0.563706	175	1	1.5932
DOCK5	15	0.96859	0.98649	0.999997	1642	1	0.21012	0.19042	0.47423	0.881963	565	7	0.21012
NonTargeting_Human_0614	1	0.96879	0.96868	0.999997	1643	0	1.1274	0.031214	0.031396	0.563706	173	1	1.1274
EPB41	15	0.9691	0.98678	0.999997	1644	2	0.31092	0.032551	0.13956	0.726	178	8	0.31092
OR52B2	15	0.96912	0.98678	0.999997	1645	1	0.53033	0.0072989	0.042366	0.603115	79	8	0.53033
FZR1	15	0.96972	0.98704	0.999997	1646	2	-0.036897	0.28982	0.59539	0.916107	780	4	-0.036897
CDC14A	15	0.96974	0.98704	0.999997	1647	1	0.31879	0.013246	0.067687	0.668507	103	8	0.31879
NonTargeting_Human_0579	1	0.97026	0.97019	0.999997	1648	0	1.0969	0.029737	0.029955	0.557984	170	1	1.0969
NonTargeting_Human_0573	1	0.97108	0.97098	0.999997	1649	0	1.3886	0.028917	0.029033	0.54663	169	1	1.3886
ANAPC16	15	0.97126	0.98769	0.999997	1650	2	0.17799	0.13403	0.37655	0.833387	430	7	0.17799
CAB39	15	0.97155	0.98789	0.999997	1651	2	0.42092	0.003384	0.021529	0.496027	62	8	0.42092
MRPS16	15	0.97174	0.98797	0.999997	1652	1	0.17014	0.44092	0.73736	0.987853	1039	4	0.17014
MRPL21	15	0.97274	0.98849	0.999997	1653	1	0.35974	0.024612	0.11264	0.70065	153	9	0.35974
NonTargeting_Human_0507	1	0.97289	0.9727	0.999997	1654	0	1.205	0.027112	0.027297	0.531078	165	1	1.205
CBWD1	15	0.97295	0.98852	0.999997	1655	1	0.25426	0.098895	0.30986	0.818907	338	6	0.25426
NonTargeting_Human_0993	1	0.97338	0.97314	0.999997	1656	0	1.1927	0.02662	0.026828	0.52859	164	1	1.1927
NonTargeting_Human_0871	1	0.97461	0.97435	0.999997	1657	0	0.86655	0.02539	0.025595	0.521126	159	1	0.86655
GPBP1L1	15	0.97507	0.98884	0.999997	1658	1	0.70842	6.8473e-06	7.6335e-05	0.006683	20	13	0.70842
NonTargeting_Human_0523	1	0.9751	0.97481	0.999997	1659	0	1.4842	0.024897	0.025058	0.516191	155	1	1.4842
NonTargeting_Human_0073	1	0.97535	0.97507	0.999997	1660	0	1.1519	0.024651	0.024736	0.515618	154	1	1.1519
NonTargeting_Human_0673	1	0.97576	0.97548	0.999997	1661	0	1.0493	0.024241	0.024391	0.514553	151	1	1.0493
NonTargeting_Human_0449	1	0.976	0.97575	0.999997	1662	0	1.2269	0.023995	0.024187	0.514553	146	1	1.2269
NonTargeting_Human_0079	1	0.97633	0.97607	0.999997	1663	0	1.1275	0.023667	0.023876	0.514553	145	1	1.1275
NonTargeting_Human_0808	1	0.97732	0.97727	0.999997	1664	0	1.6182	0.022683	0.022943	0.514553	143	1	1.6182
NonTargeting_Human_0055	1	0.97888	0.97872	0.999997	1665	0	1.3701	0.021124	0.021298	0.496027	140	1	1.3701
NonTargeting_Human_0956	1	0.97929	0.97912	0.999997	1666	0	1.4749	0.020714	0.02093	0.496027	139	1	1.4749
NonTargeting_Human_0730	1	0.98011	0.9799	0.999997	1667	0	1.0792	0.019893	0.020195	0.496027	135	1	1.0792
NonTargeting_Human_0603	1	0.98035	0.98008	0.999997	1668	0	1.1678	0.019647	0.019952	0.496027	134	1	1.1678
UBE2L3	15	0.98139	0.9899	0.999997	1669	1	0.21484	0.041851	0.16779	0.726	206	6	0.21484
NonTargeting_Human_0563	1	0.98142	0.98136	0.999997	1670	0	1.4822	0.018581	0.018713	0.481059	132	1	1.4822
NonTargeting_Human_0474	1	0.9824	0.98247	0.999997	1671	0	1.7012	0.017596	0.017724	0.481059	128	1	1.7012
NonTargeting_Human_0383	1	0.98257	0.9826	0.999997	1672	0	1.3338	0.017432	0.0176	0.481059	127	1	1.3338
AGPAT6	15	0.98264	0.99014	0.999997	1673	1	0.4744	8.1185e-05	0.00073225	0.049315	25	10	0.4744
TNFRSF4	15	0.98297	0.99024	0.999997	1674	1	0.18411	0.18247	0.46115	0.876645	549	7	0.18411
NonTargeting_Human_0947	1	0.98314	0.98326	0.999997	1675	0	1.8709	0.016858	0.016983	0.479639	123	1	1.8709
NonTargeting_Human_0252	1	0.98339	0.98351	0.999997	1676	0	1.0974	0.016612	0.01674	0.479639	122	1	1.0974
WWP1	15	0.98359	0.99038	0.999997	1677	1	0.47211	0.014556	0.072923	0.672205	108	9	0.47211
NonTargeting_Human_0928	1	0.9838	0.984	0.999997	1678	0	2.603	0.016202	0.016237	0.479639	118	1	2.603
NonTargeting_Human_0905	1	0.98388	0.98406	0.999997	1679	0	1.5214	0.01612	0.016175	0.479639	117	1	1.5214
UHRF2	15	0.98489	0.99071	0.999997	1680	1	0.0072417	0.11042	0.33193	0.825315	369	6	0.0072417
GATS	15	0.98492	0.99071	0.999997	1681	1	0.086265	0.01113	0.059607	0.657551	93	5	0.086265
NonTargeting_Human_0792	1	0.98503	0.98522	0.999997	1682	0	1.2276	0.014971	0.01488	0.465258	112	1	1.2276
NonTargeting_Human_0316	1	0.98642	0.98654	0.999997	1683	0	1.4341	0.013577	0.013477	0.429073	104	1	1.4341
GTDC2	15	0.98805	0.99159	0.999997	1684	1	0.10844	0.092842	0.29751	0.805156	320	6	0.10844
ASH2L	15	0.98882	0.99186	0.999997	1685	1	0.24851	0.016542	0.08106	0.695763	121	7	0.24851
TGIF1	15	0.98909	0.99196	0.999997	1686	1	1.0261	2.7246e-10	2.8272e-06	0.000291	10	13	1.0261
RBM4B	15	0.98949	0.99207	0.999997	1687	1	0.24923	0.04889	0.18767	0.733848	232	7	0.24923
LONP1	15	0.99005	0.99228	0.999997	1688	1	0.15194	0.14378	0.39423	0.839916	449	6	0.15194
BATF	15	0.99025	0.99239	0.999997	1689	1	0.14218	0.30976	0.61774	0.927683	810	6	0.14218
C6orf62	15	0.9906	0.99249	0.999997	1690	1	0.76139	0.0010235	0.0076307	0.284285	47	9	0.76139
TMEM134	15	0.99063	0.9925	0.999997	1691	1	0.47396	0.0037063	0.02348	0.514553	63	9	0.47396
NonTargeting_Human_0340	1	0.99094	0.9911	0.999997	1692	0	1.5287	0.0090648	0.0088068	0.31471	85	1	1.5287
AGPAT1	15	0.99099	0.99266	0.999997	1693	1	0.41242	0.0052882	0.031826	0.563706	70	9	0.41242
SPI1	15	0.99182	0.9931	0.999997	1694	1	0.46748	0.00040672	0.0032598	0.150208	38	10	0.46748
TMEM87B	15	0.9927	0.99353	0.999997	1695	1	-0.058453	0.11729	0.34485	0.825315	385	5	-0.058453
GPR52	15	0.99272	0.99356	0.999997	1696	1	0.23826	0.34228	0.65315	0.940517	882	6	0.23826
FAM219B	15	0.99313	0.99378	0.999997	1697	1	0.24214	0.26208	0.56323	0.909598	718	6	0.24214
NSUN3	15	0.99382	0.9942	0.999997	1698	1	0.26725	0.062568	0.22569	0.772732	263	7	0.26725
ZDHHC5	15	0.99385	0.99421	0.999997	1699	1	0.31191	0.004319	0.026867	0.52859	67	9	0.31191
ELF4	15	0.99428	0.99453	0.999997	1700	1	0.47165	0.0008305	0.006415	0.249615	45	11	0.47165
NDNL2	15	0.99432	0.99456	0.999997	1701	1	0.37184	0.01085	0.058453	0.657551	90	9	0.37184
MED20	15	0.99458	0.99473	0.999997	1702	1	0.040574	0.2974	0.60402	0.919586	792	4	0.040574
MBOAT7	15	0.99479	0.99489	0.999997	1703	1	0.60571	0.00025254	0.0021911	0.106573	35	11	0.60571
TAOK1	15	0.99484	0.99493	0.999997	1704	1	0.66854	0.00022098	0.0018858	0.094342	34	11	0.66854
KDM3B	15	0.99572	0.99559	0.999997	1705	1	0.64125	0.0042039	0.026268	0.52859	66	10	0.64125
ZBTB44	15	0.99576	0.99562	0.999997	1706	1	0.24838	0.062159	0.22464	0.772732	262	8	0.24838
CHRNA3	15	0.99585	0.99569	0.999997	1707	1	0.22703	0.2124	0.50351	0.881963	617	5	0.22703
RALGAPB	15	0.99622	0.99609	0.999997	1708	1	1.3818	3.3799e-10	2.8272e-06	0.000291	11	11	1.3818
CNTN6	15	0.99641	0.99624	0.999997	1709	1	0.20976	0.025055	0.11422	0.70065	156	8	0.20976
PSMD5	15	0.99678	0.99659	0.999997	1710	0	0.3322	0.023367	0.10782	0.70065	144	8	0.3322
CCDC101	15	0.99689	0.99671	0.999997	1711	0	0.72064	5.5525e-07	8.4817e-06	0.000782	19	12	0.72064
RALGAPA2	15	0.99725	0.99704	0.999997	1712	0	0.56072	4.2968e-05	0.00038733	0.029488	23	10	0.56072
CLDND2	15	0.99735	0.99715	0.999997	1713	0	0.29065	0.011679	0.06188	0.657551	95	9	0.29065
FBXL8	15	0.99751	0.99735	0.999997	1714	0	0.35093	0.13356	0.37565	0.833387	428	7	0.35093
KCNU1	15	0.99756	0.99741	0.999997	1715	0	0.2063	0.11607	0.34242	0.825315	380	6	0.2063
COA4	15	0.99761	0.99744	0.999997	1716	0	0.33155	0.0037389	0.023644	0.514553	64	10	0.33155
CUL7	15	0.99761	0.99744	0.999997	1717	0	0.21162	0.18624	0.4676	0.878413	555	7	0.21162
FAM104A	15	0.99774	0.99753	0.999997	1718	0	0.34589	0.026574	0.11992	0.704966	163	8	0.34589
TMEM18	15	0.99801	0.99786	0.999997	1719	0	0.34769	0.0061856	0.0367	0.59247	72	10	0.34769
TMEM67	15	0.99808	0.99793	0.999997	1720	0	0.50747	0.00019919	0.0017105	0.093905	30	12	0.50747
STAG2	15	0.99834	0.99822	0.999997	1721	0	0.3509	0.010741	0.057989	0.657551	88	9	0.3509
SDHAF1	15	0.99842	0.99828	0.999997	1722	0	0.49591	0.0314	0.13624	0.720693	174	8	0.49591
MED12	15	0.99853	0.9984	0.999997	1723	0	2.0791	1.1048e-20	2.8272e-06	0.000291	1	14	2.0791
SMC1A	15	0.99877	0.99867	0.999997	1724	0	0.29697	0.00082068	0.0063358	0.249615	44	8	0.29697
SERPINA1	15	0.99888	0.99879	0.999997	1725	0	0.24566	0.10818	0.32753	0.825315	364	7	0.24566
OR56A1	15	0.99905	0.99896	0.999997	1726	0	0.35305	0.0011458	0.0084337	0.307653	48	11	0.35305
B4GALT2	15	0.99909	0.99902	0.999997	1727	0	0.39487	0.0091431	0.050995	0.62029	86	9	0.39487
PDGFA	15	0.99926	0.99922	0.999997	1728	0	0.31834	0.0064694	0.038216	0.597463	75	10	0.31834
ARPC5L	15	0.9994	0.99943	0.999997	1729	0	0.24782	0.078364	0.26614	0.780578	295	8	0.24782
FRY	15	0.99952	0.99956	0.999997	1730	0	0.47791	0.00054992	0.0043964	0.197385	39	11	0.47791
C7orf26	15	0.99959	0.99965	0.999997	1731	0	1.1115	2.3546e-11	2.8272e-06	0.000291	9	14	1.1115
NonTargeting_Human_0257	1	0.99963	0.99965	0.999997	1732	0	6.2844	0.00036916	0.00040995	0.029909	37	1	6.2844
RAP1GAP	15	0.99972	0.99981	0.999997	1733	0	0.30633	0.02725	0.12249	0.704966	166	9	0.30633
MLLT1	15	0.99978	0.99986	0.999997	1734	0	0.98763	4.7153e-07	8.4817e-06	0.000782	18	12	0.98763
PROX1	15	0.99982	0.99991	0.999997	1735	0	1.4862	1.5845e-13	2.8272e-06	0.000291	3	14	1.4862
TFRC	15	0.99988	0.99994	0.999997	1736	0	0.89559	1.9544e-07	2.8272e-06	0.000291	16	10	0.89559
FAM110D	15	0.99991	0.99996	0.999997	1737	0	0.4422	0.00071871	0.0056573	0.236818	41	11	0.4422
FAM134C	15	0.99993	0.99997	0.999997	1738	0	0.48956	0.00021966	0.0018801	0.094342	33	12	0.48956
MAP1S	15	0.99994	0.99997	0.999997	1739	0	0.70098	6.2481e-05	0.00059655	0.041782	24	12	0.70098
EPHA2	15	0.99994	0.99997	0.999997	1740	0	0.64754	2.5562e-07	2.8272e-06	0.000291	17	11	0.64754
EHD2	15	0.99995	0.99997	0.999997	1741	0	0.43608	0.00011016	0.00098105	0.061351	27	11	0.43608
CARM1	15	0.99995	0.99998	0.999997	1742	0	1.2345	3.4444e-12	2.8272e-06	0.000291	8	13	1.2345
KLHDC7B	15	0.99996	0.99998	0.999997	1743	0	0.32212	0.046637	0.18157	0.726099	225	8	0.32212
PDCD10	15	0.99997	0.99998	0.999997	1744	0	1.1987	2.5324e-13	2.8272e-06	0.000291	4	14	1.1987
EGLN2	15	0.99999	0.99999	0.999997	1745	0	1.8719	5.8703e-19	2.8272e-06	0.000291	2	14	1.8719
CERS6	15	1	1	0.999997	1746	0	0.9442	7.3772e-08	2.8272e-06	0.000291	15	14	0.9442
SQLE	15	1	1	0.999997	1747	0	1.4654	4.0396e-09	2.8272e-06	0.000291	14	13	1.4654
NXF5	15	1	1	0.999997	1748	0	0.56625	0.00021592	0.0018518	0.094342	32	11	0.56625
STK40	15	1	1	0.999997	1749	0	1.244	3.7461e-10	2.8272e-06	0.000291	12	14	1.244
LSS	15	1	1	0.999997	1750	0	1.2451	5.5706e-10	2.8272e-06	0.000291	13	15	1.2451
IRF2BP2	15	1	1	0.999997	1751	0	1.3167	3.3771e-13	2.8272e-06	0.000291	5	15	1.3167

## Sheet: LDLRKO_LP-rich_gRNA
sgrna	Gene	control_count	treatment_count	control_mean	treat_mean	LFC	control_var	adj_var	score	p.low	p.high	p.twosided	FDR	high_in_treatment
CHD7_14	CHD7	2732.4/2955.2/1435.6	218.8/315.26/433.31	2732.4	315.26	-3.1115	865740	94177	7.8765	1.6834e-15	1	3.3668e-15	5.7071e-13	FALSE
HAVCR1_13	HAVCR1	2450.7/2671.7/1437	337.16/107.88/259.12	2450.7	259.12	-3.2365	538160	84401	7.5436	2.2846e-14	1	4.5693e-14	7.0593e-12	FALSE
HNF4A_4	HNF4A	2650.9/2775.8/2076.1	350.09/388.38/561.78	2650.9	388.38	-2.7678	172980	91347	7.4858	3.5544e-14	1	7.1088e-14	1.0845e-11	FALSE
CHD7_12	CHD7	2659.9/1988.1/2416.6	376.94/587.37/151.33	2416.6	376.94	-2.6774	121420	83220	7.0705	7.7195e-13	1	1.5439e-12	2.1413e-10	FALSE
STK11_5	STK11	2386.3/2945.4/3057.2	900.08/640.11/721.82	2945.4	721.82	-2.0272	162510	101570	6.9769	1.5092e-12	1	3.0185e-12	4.0484e-10	FALSE
HNF4A_9	HNF4A	2296.6/2592.8/2018.8	380.92/620.93/302.67	2296.6	380.92	-2.5888	82457	79060	6.8133	4.7701e-12	1	9.5402e-12	1.1761e-09	FALSE
ATP11A_3	ATP11A	1778.4/2067.9/1117.9	144.21/85.109/242.79	1778.4	144.21	-3.6152	260090	61110	6.6108	1.8799e-11	1	3.7598e-11	4.4123e-09	FALSE
ATP11A_6	ATP11A	2216.9/2200.7/1194.3	276.49/382.39/584.65	2200.7	382.39	-2.5217	506530	75735	6.6073	1.9568e-11	1	3.9136e-11	4.5491e-09	FALSE
HNF4A_5	HNF4A	1981.4/1838.3/1176.7	271.51/347.63/195.97	1838.3	271.51	-2.7547	229080	63181	6.2332	2.2844e-10	1	4.5689e-10	4.6085e-08	FALSE
ATP11A_5	ATP11A	1435.1/1588.9/919.29	16.908/177.41/68.59	1435.1	68.59	-4.3671	144840	49236	6.1813	3.1788e-10	1	6.3575e-10	6.2075e-08	FALSE
EMC6_8	EMC6	1916.1/2372.1/2162.2	492.31/415.95/534.56	2162.2	492.31	-2.1326	52297	74399	6.1221	4.6189e-10	1	9.2379e-10	8.6186e-08	FALSE
HAVCR1_10	HAVCR1	1630.8/2126.3/1595.9	207.86/181.01/310.29	1630.8	207.86	-2.9658	123370	56001	6.0132	9.0925e-10	1	1.8185e-09	1.6441e-07	FALSE
VPS29_15	VPS29	539.06/1379.8/1284.1	248.64/0/38.105	1284.1	38.105	-5.0383	282100	44021	6.0026	9.7093e-10	1	1.9419e-09	1.7427e-07	FALSE
HNF4A_13	HNF4A	1993.1/1790.7/1592.9	415.73/302.08/152.42	1790.7	302.08	-2.5636	40046	61535	6.0011	9.7985e-10	1	1.9597e-09	1.7459e-07	FALSE
EMC6_15	EMC6	2632.8/2502.2/1531.2	775.76/1024.9/643.44	2502.2	775.76	-1.6882	479950	86187	5.8806	2.0439e-09	1	4.0877e-09	3.5636e-07	FALSE
ATP11A_1	ATP11A	1647.1/2178.3/1754	331.19/312.86/126.29	1754	312.86	-2.4833	95728	60265	5.8705	2.1721e-09	1	4.3443e-09	3.7604e-07	FALSE
ATP11A_15	ATP11A	2111.8/1335/1498.1	162.11/460.31/226.45	1498.1	226.45	-2.7204	201650	51414	5.6084	1.0208e-08	1	2.0415e-08	1.6286e-06	FALSE
CHD7_9	CHD7	1702.3/1770.1/1362.8	383.9/236.15/473.6	1702.3	383.9	-2.1458	59950	58477	5.4521	2.4888e-08	1	4.9776e-08	3.6597e-06	FALSE
ATP11A_8	ATP11A	1385.2/1322.4/690.57	88.516/350.02/174.2	1322.4	174.2	-2.9172	201580	45345	5.3935	3.4557e-08	1	6.9113e-08	4.9329e-06	FALSE
CCDC22_11	CCDC22	1183.2/1648.1/1481.2	276.49/52.743/279.8	1481.2	276.49	-2.4172	58319	50829	5.3434	4.5604e-08	1	9.1208e-08	6.3611e-06	FALSE
CHD7_3	CHD7	1325.4/1610.4/1256.1	253.61/130.66/189.44	1325.4	189.44	-2.8002	43002	45450	5.3295	4.923e-08	1	9.8461e-08	6.7512e-06	FALSE
ATP11A_11	ATP11A	1687.8/2325.4/1789.3	607.68/492.67/451.82	1789.3	492.67	-1.8586	148860	61486	5.2291	8.5165e-08	1	1.7033e-07	1.136e-05	FALSE
MBTPS2_11	MBTPS2	1474.9/1361/893.55	239.69/268.51/207.95	1361	239.69	-2.5005	115740	46677	5.1903	1.05e-07	1	2.1e-07	1.3706e-05	FALSE
ATP11A_4	ATP11A	926.81/2099.3/988.42	118.35/1.1987/45.726	988.42	45.726	-4.4043	618970	33823	5.1821	1.097e-07	1	2.1939e-07	1.4193e-05	FALSE
EXOC8_2	EXOC8	856.15/1007.5/1113.4	0/135.45/56.614	1007.5	56.614	-4.1297	17066	34480	5.1604	1.2321e-07	1	2.4641e-07	1.5664e-05	FALSE
CHD7_10	CHD7	1190.5/1472.2/768.53	112.39/149.84/179.64	1190.5	149.84	-2.9816	128710	40790	5.1552	1.2668e-07	1	2.5336e-07	1.6022e-05	FALSE
TAF8_7	TAF8	2120.9/1854.4/1734.9	737.96/562.2/562.87	1854.4	562.87	-1.7183	42647	63740	5.1157	1.563e-07	1	3.1259e-07	1.9367e-05	FALSE
AXIN1_15	AXIN1	1930.6/1656.1/1712.8	485.35/565.79/442.02	1712.8	485.35	-1.8172	25327	58840	5.0603	2.0929e-07	1	4.1859e-07	2.5291e-05	FALSE
KMT2D_15	KMT2D	1730.4/1258.7/1450.3	296.38/328.45/341.86	1450.3	328.45	-2.1392	57588	49762	5.029	2.4657e-07	1	4.9314e-07	2.9504e-05	FALSE
CHD7_5	CHD7	1371.6/1199.5/1367.9	144.21/556.2/287.42	1367.9	287.42	-2.2468	14187	46916	4.9884	3.0439e-07	1	6.0878e-07	3.5381e-05	FALSE
HAVCR1_12	HAVCR1	1130.7/1457.9/717.05	210.85/81.513/153.51	1130.7	153.51	-2.8727	139070	38727	4.968	3.3823e-07	1	6.7645e-07	3.8944e-05	FALSE
HAVCR1_3	HAVCR1	827.16/1644.5/1528.2	430.64/166.62/390.85	1528.2	390.85	-1.9644	252510	52456	4.966	3.4176e-07	1	6.8352e-07	3.9166e-05	FALSE
STK11_1	STK11	1496.7/1579/1418.6	126.31/605.35/383.23	1496.7	383.23	-1.9627	6432.3	51365	4.9128	4.4885e-07	1	8.977e-07	5.003e-05	FALSE
MBTPS1_14	MBTPS1	1628.9/1700.1/1141.4	531.09/479.49/348.39	1628.9	479.49	-1.7623	121390	55939	4.86	5.869e-07	1	1.1738e-06	6.3502e-05	FALSE
HNF4A_15	HNF4A	1420.6/1751.2/1078.9	403.79/359.61/319	1420.6	359.61	-1.979	113050	48736	4.8059	7.7027e-07	1	1.5405e-06	8.1045e-05	FALSE
C16orf62_5	C16orf62	1087.2/1195/761.17	170.07/233.75/132.82	1087.2	170.07	-2.6692	58952	37227	4.755	9.9225e-07	1	1.9845e-06	0.0001005	FALSE
TMEM30A_6	TMEM30A	534.53/174.95/583.93	55.695/0/0	534.53	0	-9.0648	65869	18211	4.7217	1.1693e-06	1	2.3386e-06	0.00011732	FALSE
KMT2D_6	KMT2D	1642.5/1599.6/1665.8	396.83/555/530.21	1642.5	530.21	-1.6294	1190	56409	4.6834	1.411e-06	1	2.8219e-06	0.00013944	FALSE
CHD7_4	CHD7	963.05/930.35/775.14	52.712/200.19/102.34	930.35	102.34	-3.1719	12579	31822	4.6529	1.6365e-06	1	3.273e-06	0.00015852	FALSE
MBTPS2_9	MBTPS2	1492.1/833.46/1121.5	211.84/57.538/390.85	1121.5	211.84	-2.3989	110170	38412	4.6421	1.724e-06	1	3.4481e-06	0.00016439	FALSE
TMEM30A_11	TMEM30A	1129.8/1208.5/1003.9	402.8/116.28/222.1	1129.8	222.1	-2.3415	11022	38696	4.6146	1.9693e-06	1	3.9385e-06	0.00018208	FALSE
KMT2D_3	KMT2D	953.09/656.72/904.58	98.461/93.5/99.074	904.58	98.461	-3.1866	31894	30934	4.596	2.1534e-06	1	4.3067e-06	0.00019761	FALSE
C16orf62_3	C16orf62	1089/1014.7/680.27	107.41/159.43/285.25	1014.7	159.43	-2.6624	58675	34728	4.5918	2.1967e-06	1	4.3935e-06	0.00019992	FALSE
C16orf62_1	C16orf62	1474.9/1211.2/1248.8	388.87/314.06/224.28	1248.8	314.06	-1.9879	26282	42802	4.518	3.1217e-06	1	6.2435e-06	0.00027369	FALSE
GET4_6	GET4	886.95/1450.7/655.27	40.777/251.73/102.34	886.95	102.34	-3.1031	185740	30327	4.517	3.1357e-06	1	6.2713e-06	0.00027369	FALSE
HAVCR1_2	HAVCR1	291.72/742.84/839.86	142.22/0/41.372	742.84	41.372	-4.1338	106460	25368	4.4785	3.7576e-06	1	7.5153e-06	0.0003196	FALSE
HNF4A_1	HNF4A	832.59/902.54/744.99	274.5/81.513/18.508	832.59	81.513	-3.3367	6283.1	28456	4.4736	3.8453e-06	1	7.6905e-06	0.00032591	FALSE
PIK3C3_12	PIK3C3	748.34/742.84/323.59	57.684/0/45.726	742.84	45.726	-3.9927	87902	25368	4.4414	4.469e-06	1	8.938e-06	0.00037359	FALSE
AXIN1_4	AXIN1	1282/1607.7/956.8	353.07/430.34/205.77	1282	353.07	-1.8574	105920	43948	4.4309	4.6915e-06	1	9.3831e-06	0.00038952	FALSE
COMMD2_10	COMMD2	1322.7/1404/1064.9	383.9/354.82/543.27	1322.7	383.9	-1.782	36542	45356	4.4083	5.21e-06	0.99999	1.042e-05	0.0004282	FALSE
EMC6_2	EMC6	1398.8/1345.7/694.98	526.12/400.37/341.86	1345.7	400.37	-1.7465	213150	46150	4.4006	5.3979e-06	0.99999	1.0796e-05	0.00043921	FALSE
SCAP_1	SCAP	1283.8/1570.9/1409.8	450.54/266.11/566.14	1409.8	450.54	-1.6436	20921	48364	4.362	6.4438e-06	0.99999	1.2888e-05	0.00051572	FALSE
CHD7_13	CHD7	1220.3/1342.1/602.32	332.18/169.02/500.81	1220.3	332.18	-1.8741	198400	41822	4.3431	7.025e-06	0.99999	1.405e-05	0.00055676	FALSE
GREB1L_8	GREB1L	1630.8/1247.9/1211.3	420.7/202.58/350.57	1247.9	350.57	-1.8288	73946	42774	4.339	7.158e-06	0.99999	1.4316e-05	0.00056002	FALSE
CDIPT_2	CDIPT	1346.3/2226.7/792.06	345.11/421.95/698.96	1346.3	421.95	-1.6715	541180	46169	4.3018	8.4704e-06	0.99999	1.6941e-05	0.00065848	FALSE
GET4_9	GET4	1542.9/1377.1/909.73	442.58/245.74/631.46	1377.1	442.58	-1.6355	122970	47235	4.3	8.5384e-06	0.99999	1.7077e-05	0.00066166	FALSE
SREBF2_5	SREBF2	1648.9/1472.2/1618.7	809.57/270.91/608.6	1618.7	608.6	-1.4098	11180	55584	4.2843	9.1638e-06	0.99999	1.8328e-05	0.00070564	FALSE
HAVCR1_7	HAVCR1	1330/1665.1/1304.7	417.72/451.92/384.32	1330	417.72	-1.6684	56483	45606	4.2717	9.6973e-06	0.99999	1.9395e-05	0.00073742	FALSE
GDI2_1	GDI2	1011.1/1125/355.95	216.81/418.35/80.566	1011.1	216.81	-2.2161	221080	34603	4.2704	9.758e-06	0.99999	1.9516e-05	0.00073744	FALSE
C11orf57_8	C11orf57	881.51/1541.3/1359.8	512.2/320.06/438.76	1359.8	438.76	-1.6297	130860	46637	4.265	9.9937e-06	0.99999	1.9987e-05	0.0007483	FALSE
KMT2D_12	KMT2D	1018.3/1244.4/837.66	201.9/222.96/322.26	1018.3	222.96	-2.1863	41865	34853	4.2608	1.0183e-05	0.99999	2.0366e-05	0.00076015	FALSE
AXIN1_10	AXIN1	824.44/1448.9/1170.8	221.79/317.66/521.5	1170.8	317.66	-1.8786	98655	40112	4.2598	1.0229e-05	0.99999	2.0458e-05	0.00076124	FALSE
CHD7_15	CHD7	1017.4/1750.3/1143.6	305.33/384.79/287.42	1143.6	305.33	-1.9017	192040	39173	4.2354	1.1407e-05	0.99999	2.2814e-05	0.00083617	FALSE
HAVCR1_11	HAVCR1	958.52/1468.6/626.59	191.95/316.46/151.33	958.52	191.95	-2.3141	185200	32793	4.2343	1.1461e-05	0.99999	2.2922e-05	0.00083762	FALSE
DCPS_6	DCPS	1493/1202.2/1352.5	655.41/444.72/396.3	1352.5	444.72	-1.6024	21173	46383	4.2148	1.2498e-05	0.99999	2.4995e-05	0.00090257	FALSE
COMMD3_15	COMMD3	955.8/1333.2/614.82	198.91/118.67/215.57	955.8	198.91	-2.2589	129340	32699	4.1867	1.4152e-05	0.99999	2.8305e-05	0.0010078	FALSE
CSNK1A1_9	CSNK1A1	1215.8/1501.8/1181.1	277.48/479.49/363.63	1215.8	363.63	-1.7386	41506	41665	4.1749	1.4904e-05	0.99999	2.9808e-05	0.0010545	FALSE
SUMO2_4	SUMO2	829.87/836.15/350.07	97.467/129.46/189.44	829.87	129.46	-2.671	115130	28362	4.165	1.557e-05	0.99998	3.114e-05	0.0010953	FALSE
CCDC22_7	CCDC22	1166/1412.1/1161.2	754.87/286.49/334.24	1166	334.24	-1.7995	30302	39946	4.1616	1.58e-05	0.99998	3.16e-05	0.0011057	FALSE
TMEM30A_14	TMEM30A	1229.4/1420.2/1221.6	171.06/375.2/452.91	1229.4	375.2	-1.7096	18231	42134	4.1615	1.5809e-05	0.99998	3.1618e-05	0.0011057	FALSE
SCAP_2	SCAP	742.9/693.5/749.4	86.527/22.776/167.66	742.9	86.527	-3.0873	1241.3	25370	4.1406	1.7321e-05	0.99998	3.4641e-05	0.0012011	FALSE
ATP11A_9	ATP11A	1021/1088.2/955.33	208.86/321.26/250.41	1021	250.41	-2.0233	4417.7	34947	4.1226	1.8731e-05	0.99998	3.7462e-05	0.0012807	FALSE
TAF7_3	TAF7	963.96/1071.2/1201.7	282.45/216.97/367.99	1071.2	282.45	-1.9194	14265	36676	4.1187	1.9052e-05	0.99998	3.8103e-05	0.0012954	FALSE
STK11_6	STK11	974.83/1158.2/1213.5	555.96/344.03/238.43	1158.2	344.03	-1.7484	18343	39678	4.0875	2.1802e-05	0.99998	4.3605e-05	0.0014545	FALSE
COMMD3_8	COMMD3	1205.9/1623/900.17	376.94/163.03/403.92	1205.9	376.94	-1.675	133710	41321	4.0778	2.2733e-05	0.99998	4.5466e-05	0.001509	FALSE
BRD2_1	BRD2	804.51/842.43/608.94	103.43/129.46/183.99	804.51	129.46	-2.6263	19843	27489	4.0776	2.2749e-05	0.99998	4.5497e-05	0.001509	FALSE
ATP11A_12	ATP11A	831.69/1451.6/995.77	243.67/332.04/193.79	995.77	243.67	-2.0264	117350	34076	4.0747	2.3041e-05	0.99998	4.6082e-05	0.0015242	FALSE
CORO1A_5	CORO1A	1201.3/1419.3/1094.3	374.95/309.27/977.68	1201.3	374.95	-1.6772	29481	41165	4.073	2.3206e-05	0.99998	4.6411e-05	0.0015269	FALSE
C16orf62_14	C16orf62	1052.7/1020.1/643.5	263.56/397.97/215.57	1020.1	263.56	-1.9484	71434	34913	4.0489	2.5726e-05	0.99997	5.1453e-05	0.0016702	FALSE
ATP11A_2	ATP11A	347.89/718.62/575.11	27.848/143.85/0	575.11	27.848	-4.3198	36111	19604	4.0427	2.642e-05	0.99997	5.284e-05	0.0017057	FALSE
STRAP_14	STRAP	1090.8/856.78/830.3	169.08/92.301/780.62	856.78	169.08	-2.3344	27731	29289	4.0207	2.9018e-05	0.99997	5.8036e-05	0.0018494	FALSE
EXOC8_15	EXOC8	1133.4/1430.1/798.68	471.42/341.63/201.41	1133.4	341.63	-1.7272	100020	38821	4.0184	2.9294e-05	0.99997	5.8588e-05	0.0018573	FALSE
EXOC8_7	EXOC8	520.03/1322.4/1090.6	318.26/250.53/369.08	1090.6	318.26	-1.7737	189660	37347	3.9968	3.21e-05	0.99997	6.4201e-05	0.0019989	FALSE
C16orf62_2	C16orf62	1565.5/972.52/998.72	242.67/260.12/386.5	998.72	260.12	-1.9368	160980	34178	3.9954	3.2291e-05	0.99997	6.4581e-05	0.0020044	FALSE
ALG8_3	ALG8	324.34/251.2/587.61	146.2/0/0	324.34	0	-8.3458	37330	11011	3.995	3.2353e-05	0.99997	6.4706e-05	0.0020044	FALSE
CDIPT_4	CDIPT	1330/1767.4/961.94	478.38/329.65/482.31	1330	478.38	-1.4732	163390	45606	3.9877	3.3364e-05	0.99997	6.6729e-05	0.0020566	FALSE
ACTR3_6	ACTR3	959.43/713.24/964.89	335.17/140.25/238.43	959.43	238.43	-2.0041	30320	32824	3.98	3.4456e-05	0.99997	6.8913e-05	0.0021027	FALSE
MBTPS1_3	MBTPS1	2501.4/1517.1/918.55	610.66/718.03/344.04	1517.1	610.66	-1.3115	663550	52071	3.9722	3.5601e-05	0.99996	7.1201e-05	0.0021404	FALSE
EXOC8_1	EXOC8	860.68/1759.3/1266.4	440.59/441.13/428.96	1266.4	440.59	-1.5211	203790	43412	3.9636	3.6922e-05	0.99996	7.3843e-05	0.0022144	FALSE
SUMO2_1	SUMO2	774.61/754.51/385.37	84.538/306.87/119.76	754.51	119.76	-2.6453	68335	25769	3.9624	3.7107e-05	0.99996	7.4213e-05	0.0022166	FALSE
VPS29_11	VPS29	925/899.85/635.41	293.4/204.98/169.84	899.85	204.98	-2.1288	35279	30771	3.9621	3.714e-05	0.99996	7.4281e-05	0.0022166	FALSE
PTAR1_1	PTAR1	920.47/1388.8/781.03	322.24/170.22/221.01	920.47	221.01	-2.0533	119390	31482	3.9428	4.027e-05	0.99996	8.0541e-05	0.0023687	FALSE
CSNK1A1_3	CSNK1A1	816.28/1048.8/985.48	519.16/222.96/263.47	985.48	263.47	-1.8992	16317	33721	3.932	4.212e-05	0.99996	8.4241e-05	0.0024422	FALSE
EXOC2_6	EXOC2	722.06/887.29/1060.5	259.58/202.58/150.24	887.29	202.58	-2.1254	28650	30339	3.932	4.2121e-05	0.99996	8.4243e-05	0.0024422	FALSE
HAVCR1_4	HAVCR1	961.24/1057.7/980.33	264.55/153.44/263.47	980.33	263.47	-1.8916	3178.8	33544	3.9143	4.5337e-05	0.99995	9.0674e-05	0.0026101	FALSE
EMC6_3	EMC6	1021.9/1043.4/816.33	290.41/318.86/201.41	1021.9	290.41	-1.8116	21368	34978	3.9115	4.5856e-05	0.99995	9.1712e-05	0.0026338	FALSE
TMEM30A_9	TMEM30A	635.09/1007.5/842.8	57.684/179.81/218.83	842.8	179.81	-2.2225	35136	28807	3.908	4.6528e-05	0.99995	9.3055e-05	0.0026661	FALSE
hsa-mir-6511a-4_4	hsa-mir-6511a-4	1014.7/1441.7/1732.7	573.86/541.82/1265.1	1441.7	573.86	-1.3275	133510	49467	3.9021	4.7684e-05	0.99995	9.5368e-05	0.0027132	FALSE
KMT2D_4	KMT2D	578.92/1042.5/914.14	508.22/203.78/225.37	914.14	225.37	-2.0153	64424	31264	3.896	4.8892e-05	0.99995	9.7783e-05	0.0027689	FALSE
VPS29_8	VPS29	547.21/680.04/723.66	89.51/118.67/78.388	680.04	89.51	-2.9116	9773.9	23209	3.8955	4.9003e-05	0.99995	9.8006e-05	0.0027689	FALSE
COMMD10_3	COMMD10	1107.1/1611.3/1562.8	663.37/469.9/744.69	1562.8	663.37	-1.235	105000	53651	3.8831	5.1577e-05	0.99995	0.00010315	0.0028942	FALSE
KMT2D_2	KMT2D	864.3/776.04/525.83	243.67/44.352/149.16	776.04	149.16	-2.3715	35196	26510	3.8541	5.8071e-05	0.99994	0.00011614	0.0032143	FALSE
SCAP_9	SCAP	1155.1/1225.5/1284.8	437.61/181.01/458.35	1225.5	437.61	-1.4836	4235.1	42000	3.8446	6.0373e-05	0.99994	0.00012075	0.0033239	FALSE
GET4_12	GET4	857.05/1165.4/664.83	287.43/0/199.24	857.05	199.24	-2.0994	66015	29298	3.8443	6.0458e-05	0.99994	0.00012092	0.0033239	FALSE
CEBPA_6	CEBPA	1321.8/610.96/891.34	219.8/382.39/225.37	891.34	225.37	-1.9789	131960	30479	3.8153	6.8005e-05	0.99993	0.00013601	0.0036564	FALSE
SCAP_8	SCAP	1059.1/975.21/917.08	279.47/201.38/492.1	975.21	279.47	-1.7993	5206.9	33367	3.8089	6.9787e-05	0.99993	0.00013957	0.0037114	FALSE
NHLRC2_11	NHLRC2	394.1/864.86/691.31	457.5/81.513/109.96	691.31	109.96	-2.6414	59226	23596	3.7957	7.36e-05	0.99993	0.0001472	0.0039056	FALSE
TAF2_1	TAF2	144.05/272.74/350.07	0/0/153.51	272.74	0	-8.0966	11270	9247.9	3.7904	7.5214e-05	0.99992	0.00015043	0.0039692	FALSE
HNF4A_10	HNF4A	630.56/890.87/529.51	80.559/52.743/156.78	630.56	80.559	-2.953	38988	21508	3.7757	7.978e-05	0.99992	0.00015956	0.0041463	FALSE
HNF4A_2	HNF4A	1020.1/1291/908.26	383.9/317.66/259.12	1020.1	317.66	-1.6801	42945	34916	3.7595	8.514e-05	0.99991	0.00017028	0.0043932	FALSE
RAB10_7	RAB10	1029.2/1321.5/1390.7	622.59/521.44/398.47	1321.5	521.44	-1.3399	45120	45314	3.7585	8.5477e-05	0.99991	0.00017095	0.0043932	FALSE
COMMD2_12	COMMD2	718.44/357.07/578.05	62.657/47.949/396.3	578.05	62.657	-3.1853	34271	19705	3.7154	0.00010143	0.9999	0.00020287	0.0051691	FALSE
AXIN1_8	AXIN1	1086.3/1103.5/1198	520.15/228.95/382.14	1103.5	382.14	-1.5274	4615.3	37790	3.7108	0.00010332	0.9999	0.00020663	0.0052541	FALSE
UBE2G2_15	UBE2G2	838.93/1125.9/708.22	247.65/207.38/211.21	838.93	211.21	-1.9848	49726	28674	3.7079	0.00010451	0.9999	0.00020901	0.0052925	FALSE
OSTC_9	OSTC	590.7/904.33/885.46	207.86/242.14/266.74	885.46	242.14	-1.8663	43621	30276	3.6977	0.0001088	0.99989	0.0002176	0.0054871	FALSE
SCAP_5	SCAP	871.55/997.64/1014.2	316.27/290.09/533.48	997.64	316.27	-1.6542	8085.6	34140	3.6877	0.00011315	0.99989	0.00022629	0.0056829	FALSE
CSNK1A1_8	CSNK1A1	857.96/601.99/429.49	380.92/31.167/78.388	601.99	78.388	-2.9251	47638	20527	3.6823	0.00011556	0.99988	0.00023112	0.0057812	FALSE
TM9SF2_2	TM9SF2	246.43/247.61/38.242	0/92.301/0	246.43	0	-7.9508	21671	8349.8	3.6802	0.00011651	0.99988	0.00023302	0.005816	FALSE
STRAP_3	STRAP	340.65/957.26/764.85	190.96/87.506/170.93	764.85	170.93	-2.1552	108490	26125	3.6769	0.00011804	0.99988	0.00023608	0.0058563	FALSE
KDM6A_13	KDM6A	661.36/610.96/621.44	89.51/61.134/284.16	621.44	89.51	-2.7818	851.78	21195	3.674	0.0001194	0.99988	0.0002388	0.0058922	FALSE
PHKG2_6	PHKG2	117.78/244.92/365.51	50.723/0/0	244.92	0	-7.9421	15354	8298.6	3.6738	0.00011948	0.99988	0.00023896	0.0058922	FALSE
C16orf62_6	C16orf62	810.85/581.36/989.89	239.69/204.98/125.2	810.85	204.98	-1.9787	42361	27707	3.6409	0.00013586	0.99986	0.00027173	0.0065933	FALSE
EMC6_12	EMC6	778.23/649.54/430.96	26.853/110.28/113.23	649.54	110.28	-2.5474	32169	22161	3.6341	0.00013949	0.99986	0.00027898	0.0067026	FALSE
MED26_7	MED26	628.75/566.1/853.84	114.37/86.307/99.074	628.75	99.074	-2.6537	27295	21446	3.6326	0.0001403	0.99986	0.0002806	0.0067235	FALSE
EXOC7_7	EXOC7	664.99/741.05/538.34	119.35/284.1/0	664.99	119.35	-2.4683	10913	22691	3.6313	0.00014098	0.99986	0.00028196	0.0067252	FALSE
GET4_8	GET4	1296.5/1376.2/1284.8	533.08/495.07/840.5	1296.5	533.08	-1.2805	3250.7	44449	3.6208	0.00014685	0.99985	0.0002937	0.0069335	FALSE
HAVCR1_9	HAVCR1	1281/1286.5/1163.5	533.08/433.93/522.59	1281	522.59	-1.2919	6929.4	43917	3.6192	0.00014773	0.99985	0.00029547	0.0069591	FALSE
PIK3C3_10	PIK3C3	762.83/952.78/778.09	109.4/189.4/188.35	778.09	188.35	-2.0407	15375	26580	3.6188	0.00014796	0.99985	0.00029593	0.0069591	FALSE
CCDC22_1	CCDC22	1266.6/1518.9/886.93	474.41/513.05/521.5	1266.6	513.05	-1.3021	103890	43416	3.6162	0.00014945	0.99985	0.0002989	0.0070022	FALSE
CDIPT_14	CDIPT	857.96/1197.7/286.82	222.78/239.74/502.99	857.96	239.74	-1.8351	220810	29329	3.6103	0.00015291	0.99985	0.00030581	0.007123	FALSE
TAF1_2	TAF1	114.15/280.81/228.72	8.951/0/0	228.72	0	-7.8437	7919.4	7745.8	3.6035	0.00015699	0.99984	0.00031399	0.0072856	FALSE
STK11_3	STK11	773.7/880.11/1570.9	255.6/188.2/476.86	880.11	255.6	-1.7798	244240	30092	3.6004	0.00015885	0.99984	0.00031771	0.0073427	FALSE
TMEM30A_5	TMEM30A	1308.2/1420.2/1250.2	615.63/135.45/546.54	1308.2	546.54	-1.2577	7950.1	44855	3.5964	0.00016131	0.99984	0.00032263	0.0074178	FALSE
KMT2D_11	KMT2D	917.75/1265.9/889.87	192.94/296.08/280.89	917.75	280.89	-1.7045	60987	31388	3.5949	0.00016227	0.99984	0.00032454	0.0074316	FALSE
AXIN1_7	AXIN1	1162.4/1345.7/977.39	418.71/553.81/445.29	1162.4	445.29	-1.3823	33920	39821	3.5935	0.00016316	0.99984	0.00032633	0.0074445	FALSE
EMC6_1	EMC6	925.91/696.19/522.16	261.57/143.85/139.36	696.19	143.85	-2.267	41529	23764	3.5879	0.00016666	0.99983	0.00033331	0.0075614	FALSE
RAB10_11	RAB10	1340.8/1448.9/1729.7	941.85/649.7/517.14	1448.9	649.7	-1.1559	45271	49715	3.5844	0.00016894	0.99983	0.00033788	0.0076509	FALSE
CHD7_6	CHD7	652.3/645.95/608.94	149.18/117.47/83.832	645.95	117.47	-2.4491	705.19	22037	3.5697	0.00017868	0.99982	0.00035735	0.008047	FALSE
MPDU1_12	MPDU1	574.39/198.27/722.93	79.565/198.99/75.122	574.39	79.565	-2.8363	81764	19580	3.5639	0.00018267	0.99982	0.00036533	0.0081731	FALSE
GDI2_10	GDI2	828.97/1416.6/857.51	374.95/249.33/204.68	857.51	249.33	-1.778	156700	29314	3.5526	0.00019074	0.99981	0.00038148	0.0084654	FALSE
KIAA1033_11	KIAA1033	896.92/562.52/933.26	313.29/151.04/275.45	896.92	275.45	-1.6996	56572	30670	3.5488	0.00019348	0.99981	0.00038696	0.0085559	FALSE
CDIPT_10	CDIPT	970.3/1096.3/980.33	511.2/158.23/330.97	980.33	330.97	-1.5637	6777.5	33544	3.5456	0.0001959	0.9998	0.00039179	0.008647	FALSE
EXOC7_5	EXOC7	670.42/613.65/621.44	109.4/100.69/274.36	621.44	109.4	-2.4952	1229.9	21195	3.5293	0.00020832	0.99979	0.00041664	0.0091183	FALSE
STRAP_8	STRAP	505.53/499.72/598.64	51.717/44.352/59.88	505.53	51.717	-3.2643	4351.4	17217	3.5233	0.00021309	0.99979	0.00042617	0.0092883	FALSE
hsa-mir-6511a-4_7	hsa-mir-6511a-4	584.35/183.92/488.33	176.04/0/44.638	488.33	44.638	-3.4225	50943	16627	3.5226	0.00021368	0.99979	0.00042735	0.0092974	FALSE
STT3A_5	STT3A	768.27/314/923.7	197.92/77.916/551.98	768.27	197.92	-1.9513	115260	26242	3.5221	0.00021408	0.99979	0.00042817	0.0092985	FALSE
ATP11A_13	ATP11A	983.89/999.43/600.11	338.15/212.17/587.91	983.89	338.15	-1.538	73763	33667	3.5194	0.0002163	0.99978	0.00043259	0.0093614	FALSE
KDM6A_11	KDM6A	739.28/1276.7/990.63	387.88/293.69/344.04	990.63	344.04	-1.523	72494	33899	3.5119	0.00022246	0.99978	0.00044492	0.0095772	FALSE
CDIPT_12	CDIPT	641.43/758.99/655.27	63.652/131.86/416.98	655.27	131.86	-2.3044	5475.1	22357	3.5073	0.00022631	0.99977	0.00045263	0.0097259	FALSE
CCDC22_12	CCDC22	860.68/385.78/691.31	114.37/333.24/153.51	691.31	153.51	-2.1637	61017	23596	3.505	0.00022832	0.99977	0.00045664	0.0097778	FALSE
EXOC8_10	EXOC8	1009.3/752.71/600.11	192.94/218.17/162.22	752.71	192.94	-1.9584	44551	25707	3.4927	0.00023906	0.99976	0.00047812	0.010113	FALSE
OSTC_10	OSTC	400.44/739.26/1152.4	409.76/152.24/186.17	739.26	186.17	-1.9837	142750	25245	3.4828	0.00024811	0.99975	0.00049623	0.01046	FALSE
VPS35_5	VPS35	1777.5/1817.6/1032.5	905.05/919.41/1150.8	1777.5	919.41	-0.95032	278300	61079	3.4721	0.00025816	0.99974	0.00051632	0.010846	FALSE
SRCAP_15	SRCAP	375.07/657.61/672.92	83.543/139.05/309.2	657.61	139.05	-2.2335	40032	22438	3.4676	0.00026256	0.99974	0.00052513	0.010975	FALSE
KDM6A_15	KDM6A	858.86/465.62/889.14	266.54/264.92/123.03	858.86	264.92	-1.6931	77777	29360	3.4666	0.00026355	0.99974	0.00052709	0.010997	FALSE
WRB_12	WRB	925.91/1073/428.02	504.24/123.47/309.2	925.91	309.2	-1.5792	134760	31669	3.4656	0.00026455	0.99974	0.00052909	0.01102	FALSE
GET4_11	GET4	938.59/1446.2/613.35	318.26/341.63/317.91	938.59	318.26	-1.5573	181730	32106	3.4621	0.00026797	0.99973	0.00053595	0.011106	FALSE
CHD7_11	CHD7	611.53/593.92/829.57	113.38/100.69/232.99	611.53	113.38	-2.421	23924	20855	3.4607	0.00026935	0.99973	0.0005387	0.011144	FALSE
UVRAG_5	UVRAG	275.42/523.04/667.77	288.42/46.75/67.501	523.04	67.501	-2.9355	41132	17817	3.4532	0.000277	0.99972	0.00055401	0.011402	FALSE
CCDC22_8	CCDC22	1148.8/950.09/825.89	480.37/329.65/273.27	950.09	329.65	-1.5243	27451	32502	3.4415	0.0002892	0.99971	0.0005784	0.011864	FALSE
HDAC6_1	HDAC6	373.26/665.69/774.41	93.489/149.84/468.15	665.69	149.84	-2.144	48667	22715	3.4271	0.00030507	0.99969	0.00061013	0.012411	FALSE
CABIN1_11	CABIN1	851.62/1005.7/797.21	183/268.51/538.92	851.62	268.51	-1.6615	13353	29111	3.4178	0.00031559	0.99968	0.00063118	0.012775	FALSE
RAB28_1	RAB28	65.23/219.8/187.53	200.9/0/0	187.53	0	-7.5587	7999.8	6342.1	3.415	0.00031893	0.99968	0.00063786	0.012861	FALSE
CEBPA_2	CEBPA	1083.5/796.67/729.55	572.87/233.75/138.27	796.67	233.75	-1.7647	43401	27220	3.4126	0.00032176	0.99968	0.00064353	0.012918	FALSE
UBE2G2_7	UBE2G2	670.42/749.12/652.33	242.67/125.87/155.69	670.42	155.69	-2.0993	3260.8	22878	3.4069	0.00032849	0.99967	0.00065698	0.013077	FALSE
SCAP_7	SCAP	842.56/848.71/1016.4	268.53/254.13/323.35	848.71	268.53	-1.6565	14073	29011	3.4066	0.00032894	0.99967	0.00065788	0.013077	FALSE
MBTPS2_3	MBTPS2	432.15/88.818/184.59	103.43/0/0	184.59	0	-7.536	35229	6241.9	3.4009	0.00033582	0.99966	0.00067165	0.013243	FALSE
STRAP_5	STRAP	852.52/556.24/596.43	156.15/0/113.23	596.43	113.23	-2.3869	33598	20336	3.3999	0.00033708	0.99966	0.00067416	0.01325	FALSE
GET4_10	GET4	1307.3/989.56/600.11	440.59/118.67/364.72	989.56	364.72	-1.4375	126320	33862	3.3956	0.00034241	0.99966	0.00068481	0.013394	FALSE
EXOC8_12	EXOC8	1200.4/1016.5/1217.9	514.19/664.09/377.79	1200.4	514.19	-1.2216	17069	41134	3.3835	0.0003578	0.99964	0.00071559	0.013907	FALSE
EXOC2_13	EXOC2	320.72/477.29/468.47	90.505/0/51.17	468.47	51.17	-3.1697	10955	15946	3.3729	0.00037186	0.99963	0.00074371	0.014362	FALSE
KMT2D_13	KMT2D	291.72/947.4/533.19	75.587/82.711/243.87	533.19	82.711	-2.6739	114940	18165	3.3689	0.00037731	0.99962	0.00075462	0.014496	FALSE
EXOC7_4	EXOC7	446.65/580.46/549.37	91.5/130.66/0	549.37	91.5	-2.5729	5759.2	18721	3.3672	0.00037963	0.99962	0.00075927	0.014525	FALSE
CCDC115_12	CCDC115	773.7/693.5/373.6	381.91/118.67/176.37	693.5	176.37	-1.9692	54385	23671	3.3635	0.00038484	0.99962	0.00076968	0.014655	FALSE
PHKG2_12	PHKG2	1495.8/964.44/1456.2	523.14/706.04/1147.5	1456.2	706.04	-1.0433	121680	49965	3.3558	0.00039572	0.9996	0.00079145	0.014976	FALSE
PIAS1_7	PIAS1	324.34/750.92/708.96	344.12/89.904/187.26	708.96	187.26	-1.915	74845	24203	3.3552	0.00039654	0.9996	0.00079307	0.014984	FALSE
KDM6A_6	KDM6A	997.48/516.76/619.97	133.27/93.5/169.84	619.97	133.27	-2.2094	76583	21145	3.3539	0.00039837	0.9996	0.00079673	0.01503	FALSE
HNRNPU_13	HNRNPU	173.95/69.081/286.82	0/0/115.4	173.95	0	-7.4508	11868	5879.5	3.3491	0.00040536	0.99959	0.00081072	0.01527	FALSE
BMP15_1	BMP15	976.64/635.19/925.91	330.19/208.58/363.63	925.91	330.19	-1.4848	43547	31669	3.3476	0.00040762	0.99959	0.00081524	0.015323	FALSE
CHD7_1	CHD7	837.12/584.94/499.36	124.32/113.88/0	584.94	113.88	-2.3507	35459	19942	3.3472	0.00040809	0.99959	0.00081618	0.015323	FALSE
ATP6AP2_1	ATP6AP2	250.05/0/172.09	0/0/41.372	172.09	0	-7.4354	17846	5816.3	3.3399	0.00041898	0.99958	0.00083796	0.015638	FALSE
hsa-mir-6770-1_3	hsa-mir-6770-1	898.73/780.52/368.45	235.71/720.43/172.02	780.52	235.71	-1.7232	91888	26664	3.337	0.0004234	0.99958	0.0008468	0.015741	FALSE
PFN1_15	PFN1	522.75/78.95/521.42	80.559/93.5/29.396	521.42	80.559	-2.6793	97891	17762	3.3365	0.00042424	0.99958	0.00084848	0.015741	FALSE
AXIN1_6	AXIN1	793.63/566.1/775.88	341.13/190.6/232.99	775.88	232.99	-1.7313	22160	26504	3.3353	0.00042603	0.99957	0.00085206	0.01578	FALSE
GET4_4	GET4	1412.4/1047.9/994.3	420.7/417.15/353.84	1047.9	417.15	-1.3267	67879	35872	3.3301	0.00043402	0.99957	0.00086803	0.016028	FALSE
CAPZB_5	CAPZB	260.01/52.035/168.41	0.99456/0/178.55	168.41	0.99456	-6.4083	10967	5691.1	3.3217	0.00044742	0.99955	0.00089484	0.016423	FALSE
USP22_2	USP22	1532.9/1326/1498.8	927.92/745.6/658.68	1498.8	745.6	-1.0064	15514	51439	3.321	0.00044849	0.99955	0.00089699	0.016438	FALSE
SCAP_11	SCAP	1306.4/949.19/418.46	373.95/351.22/124.11	949.19	351.22	-1.4317	204640	32471	3.3184	0.0004526	0.99955	0.0009052	0.016564	FALSE
DHX36_5	DHX36	167.61/43.063/416.99	47.739/0/0	167.61	0	-7.3975	38852	5663.6	3.3176	0.00045395	0.99955	0.00090789	0.016588	FALSE
CHD7_8	CHD7	478.35/497.02/405.96	61.663/61.134/219.92	478.35	61.663	-2.9354	2794.9	16285	3.3152	0.00045783	0.99954	0.00091566	0.016705	FALSE
KMT2D_10	KMT2D	512.78/870.24/603.79	299.36/111.48/129.56	603.79	129.56	-2.2117	39639	20589	3.3127	0.00046199	0.99954	0.00092398	0.016807	FALSE
AXIN1_2	AXIN1	558.99/803.85/552.31	191.95/74.32/104.52	558.99	104.52	-2.4079	30002	19051	3.3075	0.00047061	0.99953	0.00094122	0.017019	FALSE
CCDC22_14	CCDC22	761.02/699.78/348.59	361.03/107.88/189.44	699.78	189.44	-1.8796	63541	23887	3.3038	0.00047699	0.99952	0.00095398	0.017112	FALSE
IPO9_2	IPO9	1024.7/318.49/831.04	182/274.51/351.66	831.04	274.51	-1.5946	150100	28402	3.3025	0.00047911	0.99952	0.00095823	0.017145	FALSE
STK11_15	STK11	972.11/642.36/746.46	60.668/219.36/367.99	746.46	219.36	-1.7621	30877	25492	3.3022	0.00047971	0.99952	0.00095942	0.017145	FALSE
PIK3C3_11	PIK3C3	754.68/994.94/358.16	226.76/261.32/157.87	754.68	226.76	-1.7303	107480	25775	3.289	0.00050273	0.9995	0.0010055	0.017759	FALSE
EXOC8_13	EXOC8	751.96/779.63/789.85	369.98/243.34/230.81	779.63	243.34	-1.6758	435.05	26633	3.2866	0.00050696	0.99949	0.0010139	0.017857	FALSE
GREB1L_5	GREB1L	713.91/1029.9/1059	413.74/578.98/395.21	1029.9	413.74	-1.3137	50359	35254	3.2819	0.00051563	0.99948	0.0010313	0.018125	FALSE
COMMD2_13	COMMD2	809.04/1713.6/1596.6	830.46/231.35/1245.5	1596.6	830.46	-0.94221	316980	54821	3.2723	0.00053344	0.99947	0.0010669	0.018575	FALSE
MPDU1_1	MPDU1	203.84/499.72/681.74	299.36/58.737/77.299	499.72	77.299	-2.6769	60337	17017	3.27	0.00053771	0.99946	0.0010754	0.018697	FALSE
CEBPA_8	CEBPA	843.46/1087.4/1195.8	456.5/557.4/421.34	1087.4	456.5	-1.2503	35623	37233	3.2693	0.00053899	0.99946	0.001078	0.018715	FALSE
CDC73_10	CDC73	69.76/242.23/156.65	128.3/0/0	156.65	0	-7.3006	7437	5290.8	3.262	0.00055323	0.99945	0.0011065	0.019101	FALSE
CCDC53_9	CCDC53	474.73/376.81/190.48	26.853/55.141/3.2662	376.81	26.853	-3.7617	22154	12806	3.2594	0.0005582	0.99944	0.0011164	0.019236	FALSE
STK11_7	STK11	281.76/762.58/643.5	101.45/249.33/161.13	643.5	161.13	-1.991	72519	21953	3.2592	0.00055871	0.99944	0.0011174	0.019236	FALSE
C16orf62_13	C16orf62	832.59/1156.4/761.91	399.81/128.26/283.07	832.59	283.07	-1.5531	54935	28456	3.2578	0.00056136	0.99944	0.0011227	0.0193	FALSE
CMTR1_10	CMTR1	216.53/154.31/103.7	0/0/0	154.31	0	-7.279	3216.4	5211.3	3.2499	0.00057729	0.99942	0.0011546	0.019791	FALSE
EXOC3_8	EXOC3	481.98/418.97/279.46	42.766/103.09/0	418.97	42.766	-3.2624	11716	14250	3.2446	0.000588	0.99941	0.001176	0.020046	FALSE
GDI2_5	GDI2	785.48/633.39/718.52	183.99/469.9/211.21	718.52	211.21	-1.7615	5865.2	24531	3.24	0.00059757	0.9994	0.0011951	0.020344	FALSE
PIK3C3_4	PIK3C3	953.09/1308.1/450.82	413.74/302.08/369.08	953.09	369.08	-1.3663	189140	32605	3.2343	0.00060972	0.99939	0.0012194	0.020671	FALSE
INTS12_9	INTS12	897.82/937.53/1318.6	360.03/316.46/639.08	937.53	360.03	-1.3783	73408	32069	3.2249	0.00063019	0.99937	0.0012604	0.021276	FALSE
EXOC2_11	EXOC2	753.77/1434.6/773.67	347.1/250.53/242.79	773.67	250.53	-1.6229	218580	26428	3.2184	0.00064449	0.99936	0.001289	0.021614	FALSE
KDM6A_5	KDM6A	748.34/893.57/1397.3	331.19/276.9/485.57	893.57	331.19	-1.4292	137430	30555	3.2173	0.00064694	0.99935	0.0012939	0.021662	FALSE
C19orf52_8	C19orf52	147.67/67.287/241.96	198.91/0/0	147.67	0	-7.216	7675.7	4985.6	3.2151	0.00065201	0.99935	0.001304	0.021802	FALSE
CEBPA_13	CEBPA	612.44/255.69/319.91	385.89/0/15.242	319.91	15.242	-4.3044	44848	10860	3.2116	0.00065997	0.99934	0.0013199	0.021978	FALSE
COMMD3_1	COMMD3	489.23/1345.7/772.94	378.93/197.79/253.67	772.94	253.67	-1.6036	204290	26403	3.1961	0.00069655	0.9993	0.0013931	0.023008	FALSE
USO1_1	USO1	109.62/401.93/148.56	67.63/0/1.0887	148.56	1.0887	-6.1619	32856	5015.7	3.1933	0.0007032	0.9993	0.0014064	0.023196	FALSE
USO1_4	USO1	1235.7/969.82/1185.5	542.04/499.86/547.63	1185.5	542.04	-1.1276	24523	40619	3.1928	0.00070457	0.9993	0.0014091	0.02321	FALSE
SREBF1_4	SREBF1	482.88/1001.2/773.67	556.95/215.77/254.76	773.67	254.76	-1.5988	68169	26428	3.1924	0.00070557	0.99929	0.0014111	0.023211	FALSE
CERS2_3	CERS2	910.5/685.43/445.67	157.14/197.79/283.07	685.43	197.79	-1.7879	54071	23394	3.1897	0.00071207	0.99929	0.0014241	0.023394	FALSE
ELP5_14	ELP5	163.08/392.06/611.88	81.554/37.16/19.597	392.06	37.16	-3.3646	50377	13328	3.1889	0.00071404	0.99929	0.0014281	0.023422	FALSE
CCDC22_4	CCDC22	437.59/870.24/806.03	580.82/276.9/242.79	806.03	276.9	-1.538	69938	27542	3.1886	0.00071484	0.99929	0.0014297	0.023422	FALSE
KIAA1033_3	KIAA1033	887.86/843.33/553.04	269.53/302.08/435.49	843.33	302.08	-1.4781	43123	28825	3.1881	0.0007161	0.99928	0.0014322	0.02343	FALSE
FNTB_11	FNTB	394.1/90.613/140.47	20.886/0/0	140.47	0	-7.1443	33407	4740.6	3.1765	0.00074525	0.99925	0.0014905	0.024255	FALSE
PIK3C3_2	PIK3C3	912.32/793.08/555.25	270.52/275.7/72.945	793.08	270.52	-1.5482	35391	27096	3.1749	0.00074956	0.99925	0.0014991	0.024298	FALSE
STX4_6	STX4	587.07/637.88/582.46	58.679/140.25/165.49	587.07	140.25	-2.0577	1301.2	20015	3.1645	0.00077675	0.99922	0.0015535	0.024981	FALSE
EXOC7_14	EXOC7	358.77/586.74/537.6	132.28/111.48/81.654	537.6	111.48	-2.2595	17198	18317	3.1614	0.00078494	0.99922	0.0015699	0.025211	FALSE
PRPF38B_2	PRPF38B	136.8/155.21/25.005	75.587/0/0	136.8	0	-7.1065	6418.7	4616.1	3.1566	0.00079819	0.9992	0.0015964	0.025469	FALSE
HYOU1_15	HYOU1	136.8/215.32/88.252	0/0/185.08	136.8	0	-7.1065	4260.9	4616.1	3.1566	0.00079819	0.9992	0.0015964	0.025469	FALSE
C21orf59_10	C21orf59	136.8/253.89/108.84	0/33.564/0	136.8	0	-7.1065	7246.2	4616.1	3.1566	0.00079819	0.9992	0.0015964	0.025469	FALSE
MEF2B_8	MEF2B	340.65/545.47/548.63	97.467/117.47/264.56	545.47	117.47	-2.2056	20981	18587	3.1504	0.00081519	0.99918	0.0016304	0.025876	FALSE
RANBP1_1	RANBP1	485.6/999.43/1165.7	550.99/315.26/418.07	999.43	418.07	-1.2554	145830	34202	3.1435	0.00083457	0.99917	0.0016691	0.02643	FALSE
SETD1A_12	SETD1A	1162.4/941.12/1082.6	477.39/420.75/1001.6	1082.6	477.39	-1.1795	13187	37068	3.1432	0.00083547	0.99916	0.0016709	0.02643	FALSE
KDM6A_3	KDM6A	783.67/1014.7/1031.8	304.34/731.22/428.96	1014.7	428.96	-1.2402	26830	34728	3.1431	0.0008359	0.99916	0.0016718	0.02643	FALSE
HAVCR1_1	HAVCR1	375.07/653.13/605.26	194.93/46.75/154.6	605.26	154.6	-1.9621	27639	20640	3.1413	0.00084114	0.99916	0.0016823	0.026527	FALSE
EXOC3_5	EXOC3	532.71/391.16/658.21	183.99/93.5/112.14	532.71	112.14	-2.238	17894	18149	3.1347	0.00086019	0.99914	0.0017204	0.026954	FALSE
STK11_14	STK11	1354.4/1350.2/953.85	626.57/676.07/758.84	1350.2	676.07	-0.99687	78561	46305	3.1328	0.00086566	0.99913	0.0017313	0.027056	FALSE
CCDC53_11	CCDC53	489.23/870.24/499.36	309.31/40.756/93.63	499.36	93.63	-2.4026	68828	17005	3.1324	0.00086705	0.99913	0.0017341	0.027065	FALSE
STT3A_9	STT3A	502.82/314/431.7	59.674/190.6/38.105	431.7	59.674	-2.8342	9454.8	14686	3.1257	0.00088704	0.99911	0.0017741	0.027548	FALSE
EXOC7_3	EXOC7	615.16/653.13/567.02	163.11/190.6/97.985	615.16	163.11	-1.9087	1879.6	20979	3.1245	0.00089048	0.99911	0.001781	0.027619	FALSE
RANBP1_11	RANBP1	916.85/995.84/528.78	689.23/177.41/363.63	916.85	363.63	-1.3318	78420	31357	3.1241	0.00089162	0.99911	0.0017832	0.02762	FALSE
GP1BB_4	GP1BB	854.33/628.01/917.82	321.24/278.1/465.97	854.33	321.24	-1.4083	27627	29204	3.1195	0.00090564	0.99909	0.0018113	0.027977	FALSE
TMEM30A_8	TMEM30A	1070/861.27/878.84	338.15/140.25/705.49	878.84	338.15	-1.3753	18417	30048	3.1192	0.00090657	0.99909	0.0018131	0.027977	FALSE
ACTR3_13	ACTR3	546.3/548.16/408.9	232.73/122.27/77.299	546.3	122.27	-2.1505	9441.5	18616	3.1178	0.00091109	0.99909	0.0018222	0.028027	FALSE
STRAP_15	STRAP	1734/1667.8/1465.7	868.25/921.81/1381.6	1667.8	921.81	-0.85471	22614	57283	3.1169	0.00091375	0.99909	0.0018275	0.028027	FALSE
SAFB_9	SAFB	580.73/740.15/1224.5	368.98/74.32/244.96	740.15	244.96	-1.5913	130000	25275	3.1153	0.00091891	0.99908	0.0018378	0.028144	FALSE
DYRK1A_8	DYRK1A	956.71/1373.5/1090.6	870.24/433.93/488.84	1090.6	488.84	-1.1561	48985	37347	3.1141	0.00092257	0.99908	0.0018451	0.028185	FALSE
CTNNBIP1_11	CTNNBIP1	989.32/836.15/1223	417.72/1017.7/340.77	989.32	417.72	-1.2419	39039	33854	3.1067	0.000946	0.99905	0.001892	0.028706	FALSE
UBE2G2_6	UBE2G2	1005.6/1529.6/1181.1	598.72/556.2/403.92	1181.1	556.2	-1.0851	76137	40467	3.1064	0.00094688	0.99905	0.0018938	0.028706	FALSE
CEBPA_10	CEBPA	454.8/736.56/631.74	539.05/176.21/137.18	631.74	176.21	-1.8361	21148	21549	3.1057	0.00094904	0.99905	0.0018981	0.028706	FALSE
SLC4A1AP_6	SLC4A1AP	1211.3/1525.2/1033.3	579.83/1040.5/565.05	1211.3	579.83	-1.0615	65102	41509	3.0994	0.00096961	0.99903	0.0019392	0.029184	FALSE
MBTPS2_8	MBTPS2	1036.4/740.15/622.91	247.65/351.22/246.05	740.15	247.65	-1.5757	50765	25275	3.0984	0.00097296	0.99903	0.0019459	0.029249	FALSE
PIK3C3_5	PIK3C3	350.61/341.82/144.88	26.853/0/31.573	341.82	26.853	-3.6215	19431	11609	3.0971	0.00097705	0.99902	0.0019541	0.029336	FALSE
KCTD5_1	KCTD5	1000.2/885.49/599.38	151.17/623.33/347.3	885.49	347.3	-1.3478	47510	30277	3.093	0.00099059	0.99901	0.0019812	0.029603	FALSE
DCPS_7	DCPS	641.43/468.31/844.28	173.05/184.6/358.19	641.43	184.6	-1.7913	35558	21882	3.0904	0.00099951	0.999	0.001999	0.029795	FALSE
KDM6A_7	KDM6A	703.04/1039.8/1169.3	457.5/256.52/528.03	1039.8	457.5	-1.1827	65095	35594	3.0865	0.0010127	0.99899	0.0020254	0.030073	FALSE
hsa-mir-6511a-4_3	hsa-mir-6511a-4	408.59/527.53/516.27	407.77/109.08/106.7	516.27	109.08	-2.2323	5860.6	17585	3.0847	0.0010187	0.99898	0.0020375	0.030142	FALSE
UXT_3	UXT	321.62/80.744/364.04	21.88/0/183.99	321.62	21.88	-3.8177	29911	10918	3.0842	0.0010206	0.99898	0.0020412	0.030146	FALSE
OSTC_1	OSTC	1068.1/1017.4/1183.3	478.38/596.96/378.88	1068.1	478.38	-1.1572	7920.3	36571	3.084	0.0010213	0.99898	0.0020427	0.030146	FALSE
PIK3C3_8	PIK3C3	1117.1/636.08/555.25	326.22/182.2/83.832	636.08	182.2	-1.798	118940	21698	3.0835	0.0010228	0.99898	0.0020456	0.030153	FALSE
SREBF2_14	SREBF2	893.29/964.44/386.84	188.97/493.87/354.92	893.29	354.92	-1.3292	130780	30546	3.0804	0.0010335	0.99897	0.0020671	0.030432	FALSE
MBTPS2_14	MBTPS2	440.3/360.66/918.55	69.619/57.538/71.856	440.3	69.619	-2.6436	117530	14981	3.0706	0.001068	0.99893	0.002136	0.031409	FALSE
MED26_1	MED26	121.4/149.82/47.068	58.679/0/0	121.4	0	-6.9355	3166.7	4092.9	3.0698	0.0010709	0.99893	0.0021417	0.031444	FALSE
SAFB_8	SAFB	611.53/697.99/484.65	335.17/82.711/168.75	611.53	168.75	-1.8514	11787	20855	3.0693	0.001073	0.99893	0.002146	0.031444	FALSE
KIAA1033_10	KIAA1033	1027.4/1252.4/1009	601.71/383.59/451.82	1027.4	451.82	-1.1834	25493	35165	3.0692	0.0010731	0.99893	0.0021461	0.031444	FALSE
SUMO2_2	SUMO2	989.32/993.15/1099.5	875.21/314.06/428.96	993.15	428.96	-1.2093	5659.2	33986	3.0604	0.0011052	0.99889	0.0022103	0.032154	FALSE
PRMT1_8	PRMT1	163.08/128.29/95.606	177.03/1.1987/1.0887	128.29	1.1987	-5.8778	1139.1	4327	3.0528	0.0011337	0.99887	0.0022674	0.032871	FALSE
STRAP_4	STRAP	218.34/4.4858/118.4	57.684/0/0	118.4	0	-6.8997	11482	3991.2	3.0524	0.0011352	0.99886	0.0022704	0.032871	FALSE
EXOC8_4	EXOC8	767.36/992.25/1006.1	232.73/596.96/430.05	992.25	430.05	-1.2043	25384	33955	3.051	0.0011403	0.99886	0.0022806	0.032923	FALSE
NHLRC2_5	NHLRC2	770.98/505.1/639.83	523.14/47.949/189.44	639.83	189.44	-1.7506	17677	21827	3.0505	0.0011424	0.99886	0.0022848	0.032923	FALSE
VOPP1_14	VOPP1	702.13/510.48/798.68	418.71/230.15/81.654	702.13	230.15	-1.6049	23026	23968	3.0494	0.0011466	0.99885	0.0022931	0.033002	FALSE
SORT1_5	SORT1	484.7/541.88/245.63	92.494/95.897/236.25	484.7	95.897	-2.3255	30211	16502	3.0469	0.0011561	0.99884	0.0023122	0.033186	FALSE
PIAS1_1	PIAS1	770.08/854.99/248.58	276.49/188.2/336.42	770.08	276.49	-1.4745	139590	26305	3.0436	0.0011688	0.99883	0.0023376	0.033372	FALSE
ZBTB8OS_10	ZBTB8OS	619.69/507.79/127.97	109.4/145.04/84.921	507.79	109.4	-2.2043	78394	17294	3.0436	0.0011689	0.99883	0.0023378	0.033372	FALSE
EXOC3_10	EXOC3	198.41/18.84/126.49	160.12/1.1987/1.0887	126.49	1.1987	-5.8576	8380.5	4265.9	3.0424	0.0011734	0.99883	0.0023469	0.033462	FALSE
TAF7_8	TAF7	390.48/333.74/594.96	253.61/49.147/43.549	390.48	49.147	-2.9647	22517	13274	3.042	0.0011752	0.99882	0.0023504	0.033474	FALSE
MPDU1_11	MPDU1	343.36/692.6/788.38	348.1/196.59/225.37	692.6	225.37	-1.6155	65571	23641	3.0397	0.0011841	0.99882	0.0023682	0.033648	FALSE
GDI2_12	GDI2	511.88/680.94/219.89	112.39/486.68/47.904	511.88	112.39	-2.1774	56918	17434	3.0387	0.0011881	0.99881	0.0023761	0.033721	FALSE
BRD2_15	BRD2	607/528.42/212.54	166.09/45.551/123.03	528.42	123.03	-2.0938	52979	18002	3.0315	0.0012167	0.99878	0.0024334	0.034296	FALSE
DHRSX_3	DHRSX	114.15/231.47/69.131	0/69.525/0	114.15	0	-6.8474	7894.7	3846.9	3.0272	0.0012341	0.99877	0.0024681	0.034665	FALSE
GIGYF2_5	GIGYF2	985.7/1199.5/1048.7	608.67/384.79/475.77	1048.7	475.77	-1.1386	13352	35901	3.0239	0.0012478	0.99875	0.0024956	0.03497	FALSE
STK11_2	STK11	671.33/1230/744.26	331.19/262.52/163.31	744.26	262.52	-1.4998	120630	25417	3.0221	0.0012552	0.99874	0.0025105	0.03509	FALSE
ARFRP1_6	ARFRP1	200.22/0/113.26	159.13/0/0	113.26	0	-6.8361	10195	3816.5	3.0219	0.0012561	0.99874	0.0025123	0.03509	FALSE
GET4_7	GET4	847.09/998.53/963.42	441.58/300.88/414.8	963.42	414.8	-1.2137	7382.8	32961	3.0218	0.0012564	0.99874	0.0025128	0.03509	FALSE
CCDC22_6	CCDC22	490.13/625.32/430.23	397.82/88.705/102.34	490.13	102.34	-2.2487	10932	16689	3.0191	0.0012677	0.99873	0.0025355	0.035281	FALSE
SPNS1_4	SPNS1	587.98/924.97/168.41	161.12/103.09/179.64	587.98	161.12	-1.8612	144800	20046	3.0188	0.001269	0.99873	0.002538	0.035281	FALSE
MBTPS1_2	MBTPS1	533.62/1081.1/860.45	116.36/344.03/415.89	860.45	344.03	-1.32	77747	29415	3.0111	0.0013014	0.9987	0.0026027	0.035894	FALSE
ERP44_5	ERP44	193.88/111.25/81.633	38.788/0/0	111.25	0	-6.8105	3852.5	3748.3	3.0098	0.0013072	0.99869	0.0026145	0.035975	FALSE
CSNK1A1_15	CSNK1A1	171.23/374.11/408.16	90.505/45.551/0	374.11	45.551	-3.0104	21161	12714	3.0041	0.0013317	0.99867	0.0026634	0.036586	FALSE
DCPS_4	DCPS	974.83/453.96/667.77	486.34/89.904/214.48	667.77	214.48	-1.634	70000	22787	3.004	0.0013324	0.99867	0.0026649	0.036586	FALSE
RUVBL1_5	RUVBL1	109.62/182.12/61.041	38.788/0/0	109.62	0	-6.7895	3808.2	3693.2	2.9999	0.0013503	0.99865	0.0027006	0.037035	FALSE
CDT1_2	CDT1	108.72/198.27/88.987	0/0/112.14	108.72	0	-6.7776	4204.6	3662.4	2.9944	0.001375	0.99862	0.00275	0.037502	FALSE
DHX36_3	DHX36	0/119.32/108.11	0/127.06/0	108.11	0	-6.7696	5906.6	3641.8	2.9907	0.0013919	0.99861	0.0027838	0.037793	FALSE
LSM2_9	LSM2	107.81/113.94/102.22	89.51/0/0	107.81	0	-6.7657	34.376	3631.7	2.9888	0.0014002	0.9986	0.0028005	0.037852	FALSE
CERS2_4	CERS2	684.92/779.63/327.27	252.62/77.916/228.63	684.92	228.63	-1.5787	68442	23376	2.9851	0.0014172	0.99858	0.0028345	0.038142	FALSE
CABIN1_14	CABIN1	631.46/613.65/757.49	439.6/194.19/170.93	631.46	194.19	-1.6961	8100.4	21540	2.9812	0.0014355	0.99856	0.0028709	0.038505	FALSE
POLR3C_7	POLR3C	86.068/105.86/141.94	0/0/0	105.86	0	-6.7396	846.62	3565.7	2.9768	0.0014563	0.99854	0.0029126	0.038935	FALSE
GNB2L1_2	GNB2L1	221.96/105.86/76.485	0.99456/125.87/0	105.86	0.99456	-5.7436	7171.1	3565.7	2.9768	0.0014563	0.99854	0.0029126	0.038935	FALSE
STX4_12	STX4	1279.2/1727.9/1133.3	656.41/527.43/751.22	1279.2	656.41	-0.96155	111310	43854	2.9741	0.0014691	0.99853	0.0029381	0.039191	FALSE
USP39_10	USP39	105.09/121.12/0	56.69/0/0	105.09	0	-6.7292	5650.6	3539.5	2.972	0.0014792	0.99852	0.0029584	0.039375	FALSE
NonTargeting_Human_0778	NonTargeting_Human_0778	878.8/750.02/467	206.87/274.51/753.4	750.02	274.51	-1.4468	48342	25615	2.9714	0.0014822	0.99852	0.0029644	0.039398	FALSE
SREBF2_12	SREBF2	696.69/977/904.58	373.95/537.02/382.14	904.58	382.14	-1.241	24231	30934	2.9704	0.001487	0.99851	0.0029739	0.039453	FALSE
hsa-mir-6770-1_1	hsa-mir-6770-1	934.97/996.74/918.55	554.96/403.97/229.72	934.97	403.97	-1.2087	2042.6	31981	2.9693	0.0014925	0.99851	0.002985	0.039557	FALSE
BRD2_14	BRD2	822.63/867.55/1203.9	357.05/336.84/549.81	867.55	357.05	-1.2785	57576	29659	2.9643	0.0015168	0.99848	0.0030336	0.040027	FALSE
EMC6_6	EMC6	1763/959.96/1011.2	261.57/460.31/657.59	1011.2	460.31	-1.1337	283920	34608	2.9614	0.0015314	0.99847	0.0030628	0.040282	FALSE
UPF1_1	UPF1	0/143.54/102.22	91.5/0/0	102.22	0	-6.6896	6078.6	3442.2	2.9541	0.0015681	0.99843	0.0031362	0.04107	FALSE
FNTB_13	FNTB	506.44/449.47/319.18	87.521/0/105.61	449.47	87.521	-2.3473	10111	15295	2.953	0.0015738	0.99843	0.0031475	0.04115	FALSE
BRD2_8	BRD2	970.3/461.14/1160.5	432.63/387.18/455.09	970.3	432.63	-1.1634	147710	33198	2.9509	0.0015842	0.99842	0.0031684	0.041315	FALSE
NHLRC2_10	NHLRC2	101.47/98.687/30.153	71.608/0/0	98.687	0	-6.6393	2352.3	3322.3	2.9315	0.0016864	0.99831	0.0033728	0.043369	FALSE
STRAP_9	STRAP	686.73/480.87/315.5	153.16/75.519/107.78	480.87	107.78	-2.1472	34862	16371	2.9313	0.0016879	0.99831	0.0033757	0.043369	FALSE
EXOC7_2	EXOC7	326.15/488.95/680.27	218.8/112.68/108.87	488.95	112.68	-2.1077	31554	16648	2.9297	0.0016963	0.9983	0.0033925	0.043441	FALSE
RPS14_10	RPS14	707.57/807.44/757.49	562.92/251.73/287.42	757.49	287.42	-1.395	2493.6	25872	2.9227	0.0017351	0.99826	0.0034702	0.044257	FALSE
USO1_3	USO1	660.46/710.55/292.7	222.78/194.19/274.36	660.46	222.78	-1.5636	68876	22536	2.9165	0.0017701	0.99823	0.0035401	0.045006	FALSE
STRAP_6	STRAP	1277.4/1211.2/943.56	853.33/617.34/465.97	1211.2	617.34	-0.97111	38001	41504	2.9148	0.0017796	0.99822	0.0035592	0.045062	FALSE
MESDC2_8	MESDC2	714.81/956.37/1032.5	429.65/316.46/818.72	956.37	429.65	-1.1526	32075	32718	2.9119	0.0017959	0.9982	0.0035918	0.045428	FALSE
CDIPT_8	CDIPT	730.22/1068.5/553.78	271.51/254.13/506.26	730.22	271.51	-1.424	72787	24934	2.9053	0.0018348	0.99817	0.0036695	0.046093	FALSE
PIK3C3_1	PIK3C3	430.34/466.52/310.35	47.739/273.31/83.832	430.34	83.832	-2.3461	7852.9	14639	2.8935	0.0019051	0.99809	0.0038103	0.047648	FALSE
GREB1L_10	GREB1L	543.58/516.76/389.78	134.27/71.923/187.26	516.76	134.27	-1.9365	8422	17602	2.8909	0.0019205	0.99808	0.003841	0.047982	FALSE
PRPF6_5	PRPF6	92.409/171.36/0	51.717/0/0	92.409	0	-6.5455	7386.1	3109.5	2.8905	0.0019229	0.99808	0.0038459	0.047995	FALSE
KMT2D_7	KMT2D	606.1/384.88/271.37	38.788/208.58/60.969	384.88	60.969	-2.6385	30910	13082	2.8891	0.0019314	0.99807	0.0038629	0.048158	FALSE
COPS2_1	COPS2	71.572/91.51/106.64	11.935/0/0	91.51	0	-6.5315	313.18	3079	2.8845	0.0019599	0.99804	0.0039199	0.048768	FALSE
CCDC53_3	CCDC53	193.88/424.35/447.88	365/2.3974/82.743	424.35	82.743	-2.3446	26836	14434	2.8741	0.0020261	0.99797	0.0040523	0.05016	FALSE
CCDC22_13	CCDC22	459.33/436.02/214.01	203.88/45.551/89.275	436.02	89.275	-2.2753	24915	14834	2.8726	0.0020355	0.99796	0.004071	0.050183	FALSE
MCM3_3	MCM3	72.478/202.76/89.723	150.18/0/0	89.723	0	-6.5034	6537.1	3018.5	2.8725	0.002036	0.99796	0.0040719	0.050183	FALSE
POLR2L_1	POLR2L	89.692/61.007/136.05	170.07/0/0	89.692	0	-6.5029	1486.2	3017.4	2.8723	0.0020373	0.99796	0.0040746	0.050183	FALSE
NOP16_9	NOP16	89.692/0/106.64	0/0/74.033	89.692	0	-6.5029	4165.9	3017.4	2.8723	0.0020373	0.99796	0.0040746	0.050183	FALSE
TAF8_1	TAF8	670.42/1073/608.2	240.68/47.949/236.25	670.42	236.25	-1.5008	82969	22878	2.8712	0.0020449	0.99796	0.0040898	0.050231	FALSE
COMMD2_5	COMMD2	777.33/733.87/646.44	279.47/215.77/319	733.87	279.47	-1.3896	4766	25059	2.8707	0.0020475	0.99795	0.004095	0.050231	FALSE
COMMD2_2	COMMD2	346.99/534.7/619.23	148.19/244.54/99.074	534.7	148.19	-1.8443	21191	18218	2.8693	0.0020567	0.99794	0.0041135	0.050407	FALSE
EXT1_3	EXT1	36.239/279.91/97.812	70.614/1.1987/0	97.812	1.1987	-5.49	18476	3292.6	2.8664	0.002076	0.99792	0.004152	0.050556	FALSE
PIK3C3_15	PIK3C3	1447.7/2251/934.73	1050.3/402.77/808.92	1447.7	808.92	-0.83895	454170	49675	2.8663	0.0020768	0.99792	0.0041536	0.050556	FALSE
MBTPS2_13	MBTPS2	976.64/924.07/1101.7	623.59/449.52/452.91	976.64	452.91	-1.1069	9198.8	33417	2.865	0.0020849	0.99792	0.0041699	0.05059	FALSE
SCARB1_12	SCARB1	1274.7/1816.7/1053.9	713.1/676.07/402.83	1274.7	676.07	-0.91391	171280	43698	2.8637	0.0020935	0.99791	0.0041871	0.050748	FALSE
VPS29_13	VPS29	732.03/489.85/642.77	206.87/219.36/340.77	642.77	219.36	-1.5466	15676	21928	2.8603	0.002116	0.99788	0.004232	0.051242	FALSE
GAGE1_10	GAGE1	730.22/601.09/592.02	191.95/401.57/117.58	601.09	191.95	-1.6418	8377.4	20496	2.8598	0.0021193	0.99788	0.0042387	0.051271	FALSE
SLC35B2_10	SLC35B2	726.59/551.75/634.68	312.29/116.28/214.48	634.68	214.48	-1.5607	7662.6	21650	2.857	0.0021385	0.99786	0.004277	0.051581	FALSE
CDIPT_11	CDIPT	486.51/575.97/312.56	161.12/121.07/90.364	486.51	121.07	-1.9977	19131	16564	2.8506	0.0021817	0.99782	0.0043634	0.052247	FALSE
TBC1D25_15	TBC1D25	415.84/920.48/978.12	414.73/203.78/489.93	920.48	414.73	-1.1483	128990	31482	2.8504	0.0021832	0.99782	0.0043664	0.052247	FALSE
RAB7A_14	RAB7A	364.2/111.25/423.61	201.9/55.141/41.372	364.2	55.141	-2.7016	33758	12375	2.8475	0.0022033	0.9978	0.0044066	0.052585	FALSE
DYRK1A_10	DYRK1A	858.86/645.95/965.62	370.97/293.69/715.29	858.86	370.97	-1.2089	28364	29360	2.8474	0.0022038	0.9978	0.0044075	0.052585	FALSE
FNDC3B_4	FNDC3B	483.79/343.61/459.64	106.42/220.56/88.187	459.64	106.42	-2.1004	7023.5	15643	2.8406	0.0022517	0.99775	0.0045033	0.053414	FALSE
VPS29_3	VPS29	312.56/354.38/407.43	45.75/51.545/173.11	354.38	51.545	-2.7577	2281.5	12039	2.8377	0.0022719	0.99773	0.0045437	0.053788	FALSE
STX4_3	STX4	542.68/321.18/466.26	288.42/1.1987/111.05	466.26	111.05	-2.0601	13444	15870	2.8342	0.0022967	0.9977	0.0045933	0.054218	FALSE
PAM16_11	PAM16	963.96/561.62/877.37	548/387.18/151.33	877.37	387.18	-1.1781	53598	29997	2.8302	0.0023257	0.99767	0.0046514	0.054744	FALSE
FNTB_7	FNTB	511.88/491.64/319.91	117.36/127.06/335.33	491.64	127.06	-1.9437	14950	16740	2.8275	0.0023456	0.99765	0.0046913	0.055161	FALSE
NFRKB_9	NFRKB	441.21/648.64/592.02	190.96/467.5/84.921	592.02	190.96	-1.6273	12975	20185	2.825	0.0023638	0.99764	0.0047276	0.055308	FALSE
CERS2_15	CERS2	533.62/558.93/292.7	419.7/153.44/115.4	533.62	153.44	-1.7915	29341	18180	2.8247	0.0023661	0.99763	0.0047323	0.055308	FALSE
VPS33A_11	VPS33A	419.47/439.61/285.35	85.532/76.718/105.61	419.47	85.532	-2.2807	9196.8	14267	2.8246	0.002367	0.99763	0.004734	0.055308	FALSE
EMC6_4	EMC6	587.07/843.33/387.57	435.62/77.916/188.35	587.07	188.35	-1.6349	52733	20015	2.8206	0.002397	0.9976	0.0047941	0.055938	FALSE
CDIPT_6	CDIPT	371.45/241.33/468.47	32.82/61.134/203.59	371.45	61.134	-2.5836	13171	12623	2.8201	0.0024005	0.9976	0.004801	0.055943	FALSE
PTAR1_11	PTAR1	1212.2/846.02/581.73	366.99/372.8/227.54	846.02	366.99	-1.2027	101970	28918	2.817	0.002424	0.99758	0.0048481	0.05631	FALSE
CCDC115_13	CCDC115	81.538/123.81/77.22	85.532/0/0	81.538	0	-6.367	902.68	2741.2	2.8158	0.0024325	0.99757	0.0048651	0.056389	FALSE
PIK3R4_1	PIK3R4	722.97/1266.8/804.56	388.87/338.04/206.86	804.56	338.04	-1.2486	110150	27491	2.8138	0.0024481	0.99755	0.0048963	0.056697	FALSE
POLR2L_5	POLR2L	489.23/338.23/454.5	320.25/106.69/95.808	454.5	106.69	-2.0806	7362.3	15467	2.8131	0.0024531	0.99755	0.0049063	0.056759	FALSE
ARPC4_14	ARPC4	975.74/745.54/274.32	207.86/345.23/297.22	745.54	297.22	-1.3238	137520	25461	2.8098	0.0024785	0.99752	0.004957	0.057183	FALSE
TMEM30A_15	TMEM30A	551.74/763.48/510.39	167.09/152.24/189.44	551.74	167.09	-1.7174	23272	18802	2.8089	0.0024856	0.99751	0.0049712	0.057185	FALSE
ARPC4_2	ARPC4	491.04/502.41/528.04	259.58/52.743/136.09	502.41	136.09	-1.8766	393.14	17110	2.8083	0.00249	0.99751	0.00498	0.057233	FALSE
USP9X_4	USP9X	375.98/470.11/449.35	104.43/97.096/135	449.35	104.43	-2.0948	2907	15291	2.8069	0.0025013	0.9975	0.0050026	0.057438	FALSE
STX4_1	STX4	501/671.07/954.59	246.65/636.52/109.96	671.07	246.65	-1.4403	54653	22900	2.8052	0.0025142	0.99749	0.0050283	0.057517	FALSE
SEC13_1	SEC13	723.87/439.61/962.68	240.68/516.65/283.07	723.87	283.07	-1.3515	68918	24716	2.8042	0.0025224	0.99748	0.0050449	0.057652	FALSE
GET4_15	GET4	870.64/1081.1/761.91	387.88/454.31/373.43	870.64	387.88	-1.1644	28052	29766	2.7982	0.0025693	0.99743	0.0051386	0.058341	FALSE
VPS29_14	VPS29	361.48/672.87/976.65	275.49/55.141/249.32	672.87	249.32	-1.4287	94623	22962	2.7957	0.0025897	0.99741	0.0051795	0.058696	FALSE
TAF8_2	TAF8	705.75/747.33/367.72	393.85/272.11/195.97	705.75	272.11	-1.3717	57999	24093	2.7941	0.002602	0.9974	0.005204	0.058756	FALSE
EXOC3_4	EXOC3	0/78.052/100.02	0/92.301/0	78.052	0	-6.3047	3287.4	2623.3	2.7907	0.0026294	0.99737	0.0052587	0.059319	FALSE
FNDC3B_6	FNDC3B	725.69/601.09/829.57	287.43/64.731/327.71	725.69	287.43	-1.3331	13157	24778	2.7844	0.0026811	0.99732	0.0053623	0.060195	FALSE
EXOC4_15	EXOC4	340.65/444.99/246.37	232.73/2.3974/50.081	340.65	50.081	-2.7416	9887.7	11569	2.7841	0.002684	0.99732	0.005368	0.060195	FALSE
TAF1_5	TAF1	745.62/991.36/919.29	317.26/457.91/425.69	919.29	425.69	-1.1089	17678	31441	2.7837	0.0026869	0.99731	0.0053738	0.060195	FALSE
PPIL2_7	PPIL2	934.06/509.58/1038.4	436.61/408.76/484.48	934.06	436.61	-1.0954	95536	31950	2.783	0.0026928	0.99731	0.0053856	0.060229	FALSE
PIK3R4_11	PIK3R4	776.42/690.81/778.82	323.23/570.59/138.27	776.42	323.23	-1.2617	3667.5	26523	2.7828	0.0026944	0.99731	0.0053888	0.060229	FALSE
PPIL2_10	PPIL2	923.19/1029/1042.1	353.07/600.56/507.35	1029	507.35	-1.0188	5687.3	35223	2.7797	0.0027202	0.99728	0.0054404	0.060529	FALSE
PFN1_8	PFN1	476.54/372.32/482.44	83.543/411.16/124.11	476.54	124.11	-1.9324	5448.7	16223	2.7777	0.0027375	0.99726	0.005475	0.060803	FALSE
EMC6_10	EMC6	695.79/1838.3/934	437.61/493.87/337.5	934	437.61	-1.092	437230	31948	2.7772	0.0027415	0.99726	0.005483	0.060828	FALSE
DYRK1A_11	DYRK1A	226.49/127.4/216.22	11.935/2.3974/183.99	216.22	11.935	-4.0698	3997.4	7319.4	2.7769	0.0027436	0.99726	0.0054873	0.060828	FALSE
OSTC_6	OSTC	126.84/75.361/59.57	78.57/0/0	75.361	0	-6.2548	1449.5	2532.2	2.7709	0.0027948	0.99721	0.0055896	0.061777	FALSE
ZBTB10_7	ZBTB10	772.8/501.51/753.82	307.32/309.27/507.35	753.82	309.27	-1.2826	32010	25745	2.7707	0.0027966	0.9972	0.0055931	0.061777	FALSE
INTS12_14	INTS12	751.96/810.13/903.85	391.86/196.59/349.48	810.13	349.48	-1.2106	6083.2	27683	2.7687	0.002814	0.99719	0.005628	0.062107	FALSE
SCARB1_7	SCARB1	1183.2/1595.1/908.26	626.57/1100.4/358.19	1183.2	626.57	-0.91606	122640	40540	2.7646	0.0028499	0.99715	0.0056999	0.062717	FALSE
DNAJC17_4	DNAJC17	44.393/74.464/136.79	141.23/0/0	74.464	0	-6.2377	2394.4	2501.8	2.7642	0.0028528	0.99715	0.0057056	0.062717	FALSE
PFN1_14	PFN1	717.53/771.55/458.91	138.24/285.29/558.52	717.53	285.29	-1.3276	34902	24498	2.7619	0.0028736	0.99713	0.0057472	0.06308	FALSE
CDIPT_13	CDIPT	1134.3/966.24/866.34	465.45/486.68/456.18	966.24	465.45	-1.0521	19109	33058	2.7543	0.002941	0.99706	0.005882	0.064386	FALSE
NLRP8_2	NLRP8	49.829/337.33/240.49	17.902/0/127.38	240.49	17.902	-3.6753	22865	8147.2	2.7493	0.0029862	0.99701	0.0059723	0.06514	FALSE
PIK3C3_13	PIK3C3	626.03/629.8/628.79	324.23/58.737/226.45	628.79	226.45	-1.4693	4.3318	21448	2.7482	0.002996	0.997	0.0059919	0.065296	FALSE
PRPF6_7	PRPF6	838.93/340.92/809.71	251.62/748/352.75	809.71	352.75	-1.1965	110310	27668	2.7473	0.0030048	0.997	0.0060096	0.06543	FALSE
ANKRD36_14	ANKRD36	112.34/71.772/38.242	0/0/74.033	71.772	0	-6.1853	1385	2410.8	2.7439	0.0030359	0.99696	0.0060718	0.065814	FALSE
ATP11A_7	ATP11A	768.27/772.45/408.9	324.23/302.08/324.44	768.27	324.23	-1.242	64581	26242	2.7412	0.0030609	0.99694	0.0061218	0.066167	FALSE
CAND1_1	CAND1	934.97/1542.2/1064.2	665.36/246.94/541.1	1064.2	541.1	-0.97446	122610	36434	2.7404	0.0030685	0.99693	0.0061369	0.066167	FALSE
STT3A_14	STT3A	385.04/558.03/450.82	113.38/109.08/132.82	450.82	113.38	-1.9819	7910.6	15341	2.7386	0.003085	0.99692	0.00617	0.066415	FALSE
USP9X_9	USP9X	807.22/593.02/1223.8	297.37/352.42/619.48	807.22	352.42	-1.1934	109690	27583	2.7385	0.003086	0.99691	0.006172	0.066415	FALSE
STK11_9	STK11	846.18/544.57/735.43	524.13/56.34/301.58	735.43	301.58	-1.2832	24346	25113	2.7379	0.0030913	0.99691	0.0061826	0.066424	FALSE
COMMD3_4	COMMD3	711.19/587.64/573.64	248.64/201.38/114.32	587.64	201.38	-1.5403	7730.8	20034	2.7306	0.0031611	0.99684	0.0063222	0.067509	FALSE
NDUFA13_15	NDUFA13	549.93/525.73/259.61	161.12/287.69/138.27	525.73	161.12	-1.7	35704	17910	2.7289	0.0031772	0.99682	0.0063544	0.067675	FALSE
PITPNM2_2	PITPNM2	559.89/546.37/517.74	175.04/474.69/119.76	546.37	175.04	-1.6366	501.12	18618	2.7246	0.0032194	0.99678	0.0064388	0.068313	FALSE
AP2M1_7	AP2M1	289.91/571.49/591.29	128.3/388.38/191.62	571.49	191.62	-1.5715	39838	19480	2.7239	0.0032261	0.99677	0.0064522	0.068334	FALSE
HSPE1_13	HSPE1	110.53/0/69.131	28.842/0/0	69.131	0	-6.132	3246.4	2321.4	2.7235	0.0032301	0.99677	0.0064602	0.068334	FALSE
TMEM30A_7	TMEM30A	489.23/300.55/491.27	139.24/74.32/139.36	489.23	139.24	-1.8056	17802	16658	2.7192	0.0032717	0.99673	0.0065434	0.069133	FALSE
GZF1_1	GZF1	530/638.77/623.65	356.05/227.76/128.47	623.65	227.76	-1.4492	4499.6	21271	2.7154	0.0033099	0.99669	0.0066198	0.06959	FALSE
PTAR1_2	PTAR1	492.85/752.71/600.11	166.09/212.17/356.01	600.11	212.17	-1.4956	17396	20463	2.7133	0.0033308	0.99667	0.0066616	0.069875	FALSE
CTNNBIP1_15	CTNNBIP1	1086.3/1053.3/854.57	538.06/599.36/484.48	1053.3	538.06	-0.96772	20283	36058	2.7132	0.003332	0.99667	0.006664	0.069875	FALSE
KDM6A_9	KDM6A	564.42/585.84/484.65	188.97/359.61/130.65	564.42	188.97	-1.5736	3411.3	19237	2.7093	0.0033714	0.99663	0.0067428	0.070458	FALSE
MPDU1_10	MPDU1	601.57/738.36/369.92	214.82/415.95/89.275	601.57	214.82	-1.4813	36186	20513	2.7016	0.0034507	0.99655	0.0069013	0.071869	FALSE
CWC22_9	CWC22	1050.9/644.16/1106.8	539.05/432.74/821.99	1050.9	539.05	-0.96187	84295	35977	2.6987	0.0034807	0.99652	0.0069613	0.07237	FALSE
SETD1A_8	SETD1A	329.77/549.06/489.8	348.1/103.09/142.62	489.8	142.62	-1.7728	14560	16677	2.6953	0.003516	0.99648	0.0070321	0.073044	FALSE
EMC6_11	EMC6	867.92/731.18/436.11	306.32/268.51/305.93	731.18	305.93	-1.2543	52883	24967	2.6915	0.0035569	0.99644	0.0071138	0.073767	FALSE
USP39_4	USP39	279.04/337.33/23.534	32.82/0/143.71	279.04	32.82	-3.0497	34341	9463.3	2.6846	0.0036309	0.99637	0.0072618	0.074794	FALSE
C16orf62_7	C16orf62	1635.3/1814.9/1467.2	1248.2/835.5/999.45	1635.3	999.45	-0.70978	30267	56158	2.6831	0.003647	0.99635	0.007294	0.075058	FALSE
MGAT1_11	MGAT1	774.61/1090/1031.1	527.12/694.06/456.18	1031.1	527.12	-0.96662	34626	35293	2.6826	0.003653	0.99635	0.0073059	0.075058	FALSE
CEBPA_1	CEBPA	789.1/758.1/867.07	534.08/348.83/293.96	789.1	348.83	-1.1754	3520.4	26959	2.6815	0.0036642	0.99634	0.0073284	0.075158	FALSE
VPS35_9	VPS35	449.36/577.77/381.69	119.35/92.301/182.91	449.36	119.35	-1.9039	10534	15291	2.6813	0.0036671	0.99633	0.0073341	0.075158	FALSE
GET4_3	GET4	817.19/858.58/379.48	377.93/369.2/40.283	817.19	369.2	-1.1441	96650	27926	2.6808	0.003672	0.99633	0.007344	0.075196	FALSE
UPF1_10	UPF1	212/390.26/430.96	77.576/85.109/301.58	390.26	85.109	-2.1839	16717	13267	2.6799	0.0036821	0.99632	0.0073642	0.07534	FALSE
GZF1_15	GZF1	255.48/353.48/363.3	309.31/65.929/65.324	353.48	65.929	-2.405	4849.7	12008	2.6767	0.0037181	0.99628	0.0074361	0.075948	FALSE
KMT2D_1	KMT2D	470.2/422.56/744.26	180.02/57.538/132.82	470.2	132.82	-1.816	38688	16005	2.6757	0.0037288	0.99627	0.0074576	0.076007	FALSE
KLHL20_12	KLHL20	867.92/410/920.02	611.65/328.45/407.18	867.92	407.18	-1.09	106200	29672	2.6748	0.0037391	0.99626	0.0074782	0.076122	FALSE
STRAP_11	STRAP	289.91/479.98/862.66	139.24/79.115/223.19	479.98	139.24	-1.7781	91286	16340	2.6732	0.0037565	0.99624	0.007513	0.07626	FALSE
ARPC4_10	ARPC4	795.45/1422/728.81	320.25/354.82/482.31	795.45	354.82	-1.1624	198500	27177	2.6729	0.0037604	0.99624	0.0075208	0.07626	FALSE
EIF2B4_12	EIF2B4	273.6/274.53/258.14	31.826/0/83.832	273.6	31.826	-3.0644	120.06	9277.6	2.6701	0.0037909	0.99621	0.0075818	0.076711	FALSE
SAFB_11	SAFB	609.72/655.82/839.13	429.65/256.52/132.82	655.82	256.52	-1.3508	17863	22376	2.6698	0.0037945	0.99621	0.0075891	0.076711	FALSE
UBE2G2_2	UBE2G2	550.83/532.01/275.79	173.05/227.76/105.61	532.01	173.05	-1.6146	33003	18125	2.6697	0.0037963	0.9962	0.0075925	0.076711	FALSE
hsa-mir-3680-1_4	hsa-mir-3680-1	815.38/1099.9/1000.9	634.53/507.06/494.28	1000.9	507.06	-0.97971	22113	34254	2.6684	0.0038103	0.99619	0.0076206	0.076867	FALSE
UBE2Q1_11	UBE2Q1	1101.7/796.67/1348	583.81/583.77/854.65	1101.7	583.81	-0.91496	76862	37727	2.6662	0.0038362	0.99616	0.0076723	0.077198	FALSE
GLOD5_13	GLOD5	815.38/814.62/1147.3	717.08/300.88/371.26	815.38	371.26	-1.1329	55078	27863	2.6607	0.0038991	0.9961	0.0077983	0.078271	FALSE
GZF1_13	GZF1	652.3/1212.1/1055.3	549.99/347.63/991.83	1055.3	549.99	-0.93898	93501	36130	2.6587	0.0039226	0.99608	0.0078452	0.078599	FALSE
PPIL2_8	PPIL2	56.17/104.07/61.041	30.831/0/0	61.041	0	-5.9551	937.61	2047.9	2.6579	0.0039315	0.99607	0.0078631	0.078599	FALSE
RPS14_5	RPS14	0/91.51/61.041	62.657/0/0	61.041	0	-5.9551	2327.2	2047.9	2.6579	0.0039315	0.99607	0.0078631	0.078599	FALSE
CHMP1A_1	CHMP1A	215.62/653.13/383.16	80.559/111.48/83.832	383.16	83.832	-2.179	50476	13024	2.6548	0.0039675	0.99603	0.007935	0.079188	FALSE
FUNDC2_6	FUNDC2	471.11/154.31/475.09	136.25/116.28/346.21	471.11	136.25	-1.7823	50188	16036	2.6525	0.0039946	0.99601	0.0079893	0.079552	FALSE
SRCAP_6	SRCAP	405.88/400.13/175.03	42.766/214.57/93.63	400.13	93.63	-2.0837	25351	13605	2.6523	0.0039972	0.996	0.0079944	0.079552	FALSE
CERS2_10	CERS2	481.98/690.81/664.09	90.505/264.92/286.33	664.09	264.92	-1.3226	16940	22661	2.6522	0.0039988	0.996	0.0079976	0.079552	FALSE
TM9SF2_10	TM9SF2	207.47/363.35/387.57	73.597/130.66/15.242	363.35	73.597	-2.2881	12443	12346	2.6503	0.0040214	0.99598	0.0080428	0.079789	FALSE
UBE2G2_4	UBE2G2	1013.8/1533.2/650.86	520.15/195.39/738.16	1013.8	520.15	-0.96139	200770	34697	2.6501	0.0040238	0.99598	0.0080475	0.079789	FALSE
PFN1_3	PFN1	730.22/362.45/706.75	295.38/438.73/235.16	706.75	295.38	-1.2558	59546	24127	2.6486	0.0040415	0.99596	0.0080829	0.079918	FALSE
LGR5_3	LGR5	412.22/845.12/837.66	424.68/389.58/177.46	837.66	389.58	-1.1025	90526	28630	2.6482	0.0040466	0.99595	0.0080933	0.079918	FALSE
ATP6V1H_14	ATP6V1H	77.914/40.372/59.57	50.723/0/0	59.57	0	-5.9205	352.53	1998.2	2.6454	0.0040795	0.99592	0.008159	0.080437	FALSE
GDI2_13	GDI2	628.75/612.76/315.5	230.74/260.12/101.25	612.76	230.74	-1.4052	44309	20897	2.6436	0.0041016	0.9959	0.0082031	0.080789	FALSE
SPNS1_5	SPNS1	388.66/525.73/328.74	432.63/65.929/88.187	388.66	88.187	-2.1273	11190	13212	2.6426	0.0041136	0.99589	0.0082272	0.080789	FALSE
UBE2G2_12	UBE2G2	511.88/615.45/838.39	232.73/357.22/71.856	615.45	232.73	-1.3992	30216	20989	2.6426	0.0041139	0.99589	0.0082278	0.080789	FALSE
GAGE12B_6	GAGE12B	418.56/391.16/262.55	90.505/159.43/0	391.16	90.505	-2.0995	8645.7	13297	2.6341	0.0042182	0.99578	0.0084364	0.082367	FALSE
GIGYF2_10	GIGYF2	773.7/526.63/613.35	385.89/232.55/90.364	613.35	232.55	-1.3953	16617	20917	2.6338	0.0042212	0.99578	0.0084425	0.082367	FALSE
ORMDL1_12	ORMDL1	511.88/756.3/681.01	231.73/467.5/279.8	681.01	279.8	-1.2802	17138	23242	2.632	0.0042443	0.99576	0.0084887	0.082685	FALSE
PIM2_10	PIM2	787.29/471.01/854.57	356.05/350.02/488.84	787.29	356.05	-1.1426	52282	26897	2.6295	0.0042752	0.99572	0.0085504	0.083087	FALSE
C11orf57_9	C11orf57	576.2/136.37/408.9	153.16/69.525/101.25	408.9	101.25	-2.0032	51132	13905	2.6292	0.0042792	0.99572	0.0085584	0.083099	FALSE
GP1BB_2	GP1BB	828.06/841.53/772.94	355.06/385.99/452.91	828.06	385.99	-1.0992	1610	28300	2.6279	0.0042957	0.9957	0.0085913	0.083352	FALSE
RAB5C_10	RAB5C	283.57/469.21/482.44	138.24/291.29/95.808	469.21	138.24	-1.7557	17319	15971	2.6269	0.0043089	0.99569	0.0086179	0.083544	FALSE
SPINT1_1	SPINT1	681.29/225.19/700.87	278.48/299.68/280.89	681.29	280.89	-1.2753	104210	23252	2.6262	0.0043178	0.99568	0.0086356	0.083636	FALSE
KIAA1328_7	KIAA1328	57.076/24.223/79.427	0/103.09/0	57.076	0	-5.8599	789.43	1914	2.6238	0.0043474	0.99565	0.0086949	0.083974	FALSE
GIGYF2_7	GIGYF2	932.25/761.68/933.26	557.95/465.1/176.37	932.25	465.1	-1.0016	14547	31887	2.616	0.0044477	0.99555	0.0088955	0.085253	FALSE
PGS1_14	PGS1	56.17/2.6915/154.44	0.99456/0/82.743	56.17	0.99456	-4.8411	6258.5	1883.4	2.6158	0.0044505	0.99555	0.008901	0.085253	FALSE
MED8_6	MED8	171.23/428.84/307.41	49.728/0/172.02	307.41	49.728	-2.604	16645	10433	2.6106	0.004519	0.99548	0.009038	0.086381	FALSE
BRD2_11	BRD2	764.64/705.16/828.1	58.679/342.83/351.66	764.64	342.83	-1.155	3782	26118	2.6101	0.0045253	0.99547	0.0090506	0.086434	FALSE
STX4_2	STX4	563.52/922.28/781.03	314.28/395.58/354.92	781.03	354.92	-1.1356	33631	26681	2.6087	0.0045445	0.99546	0.0090891	0.086468	FALSE
GTF2H2_12	GTF2H2	55.264/410.9/0	0/0/86.009	55.264	0	-5.8142	64764	1852.8	2.6078	0.0045568	0.99544	0.0091136	0.086468	FALSE
TMEM258_1	TMEM258	55.264/55.624/47.068	71.608/0/0	55.264	0	-5.8142	33.659	1852.8	2.6078	0.0045568	0.99544	0.0091136	0.086468	FALSE
CCT6A_3	CCT6A	55.264/81.641/0	152.17/0/0	55.264	0	-5.8142	1874.9	1852.8	2.6078	0.0045568	0.99544	0.0091136	0.086468	FALSE
EXOC1_14	EXOC1	491.04/305.03/633.94	359.04/129.46/154.6	491.04	154.6	-1.6609	27510	16720	2.6073	0.0045626	0.99544	0.0091251	0.086468	FALSE
ARHGEF35_12	ARHGEF35	496.47/179.43/509.65	158.14/409.96/103.43	496.47	158.14	-1.6444	50345	16906	2.6071	0.0045654	0.99543	0.0091307	0.086468	FALSE
OSTC_5	OSTC	134.99/43.063/55.157	43.761/0/0	55.157	0	-5.8114	3259.8	1849.2	2.6068	0.0045696	0.99543	0.0091392	0.086468	FALSE
USP22_12	USP22	249.14/347.2/533.19	69.619/68.327/246.05	347.2	69.619	-2.3018	22103	11793	2.6044	0.0046022	0.9954	0.0092043	0.086949	FALSE
TMEM165_2	TMEM165	1015.6/1466.8/518.48	739.95/531.03/507.35	1015.6	531.03	-0.93417	225380	34759	2.5991	0.0046738	0.99533	0.0093476	0.087895	FALSE
PFDN2_2	PFDN2	156.73/15.252/113.26	0.99456/3.5961/165.49	113.26	3.5961	-4.6357	5747.6	3816.5	2.5957	0.0047202	0.99528	0.0094405	0.088495	FALSE
STK11_12	STK11	145.86/64.595/113.26	63.652/3.5961/0	113.26	3.5961	-4.6357	1715.5	3816.5	2.5957	0.0047202	0.99528	0.0094405	0.088495	FALSE
MFAP1_9	MFAP1	142.24/53.829/0	30.831/0/0	53.829	0	-5.7769	5356.9	1804.4	2.5948	0.0047323	0.99527	0.0094646	0.088653	FALSE
MPDU1_2	MPDU1	384.13/442.3/216.22	78.57/91.102/91.453	384.13	91.102	-2.064	15790	13057	2.5912	0.0047816	0.99522	0.0095632	0.089371	FALSE
SSX4_13	SSX4	205.66/350.79/429.49	68.625/73.122/104.52	350.79	73.122	-2.2467	13629	11916	2.5876	0.0048323	0.99517	0.0096646	0.090112	FALSE
hsa-mir-6817_12	hsa-mir-6817	650.49/694.4/420.67	265.55/278.1/58.791	650.49	265.55	-1.2894	27373	22193	2.5844	0.0048774	0.99512	0.0097547	0.090796	FALSE
TAF7_1	TAF7	712.1/433.33/346.39	208.86/121.07/41.372	433.33	121.07	-1.8311	42636	14742	2.5842	0.0048801	0.99512	0.0097602	0.090796	FALSE
SLC35B2_15	SLC35B2	667.7/700.68/681.01	288.42/429.14/240.61	681.01	288.42	-1.2366	281.95	23242	2.5754	0.0050062	0.99499	0.010012	0.09253	FALSE
NIPSNAP1_6	NIPSNAP1	653.21/571.49/438.32	192.94/300.88/212.3	571.49	212.3	-1.4244	12206	19480	2.575	0.0050126	0.99499	0.010025	0.09253	FALSE
TAF2_6	TAF2	1000.2/932.14/1208.3	570.88/523.84/378.88	1000.2	523.84	-0.93178	23972	34229	2.5748	0.0050153	0.99498	0.010031	0.09253	FALSE
SETD1A_13	SETD1A	869.74/338.23/794.27	753.88/222.96/370.17	794.27	370.17	-1.0994	106830	27137	2.5745	0.005019	0.99498	0.010038	0.09253	FALSE
GTF3C4_6	GTF3C4	690.35/314/650.86	208.86/267.31/568.31	650.86	267.31	-1.2806	57515	22206	2.5743	0.0050226	0.99498	0.010045	0.09253	FALSE
PHKG2_8	PHKG2	1619/2307.5/2419.6	1582.3/2258.4/1432.8	2307.5	1582.3	-0.54397	243300	79436	2.5728	0.0050434	0.99496	0.010087	0.092703	FALSE
RAB10_3	RAB10	983.89/1138.5/586.14	512.2/601.75/348.39	983.89	512.2	-0.94044	91053	33667	2.5707	0.0050741	0.99493	0.010148	0.093127	FALSE
TAF8_3	TAF8	827.16/761.68/550.84	296.38/553.81/347.3	761.68	347.3	-1.1307	24371	26016	2.5692	0.0050971	0.9949	0.010194	0.093408	FALSE
STK11_10	STK11	965.77/1178/1053.9	770.78/556.2/566.14	1053.9	566.14	-0.8953	11580	36079	2.5678	0.0051175	0.99488	0.010235	0.093713	FALSE
RUVBL1_11	RUVBL1	50.735/26.915/217.69	31.826/0/0	50.735	0	-5.6931	14220	1699.9	2.5661	0.0051427	0.99486	0.010285	0.094032	FALSE
VPS72_6	VPS72	654.11/497.92/668.51	686.25/270.91/264.56	654.11	270.91	-1.2686	12302	22318	2.5655	0.0051512	0.99485	0.010302	0.094118	FALSE
SLC7A6OS_15	SLC7A6OS	115.06/50.241/0.73543	27.848/0/0	50.241	0	-5.6792	3326.1	1683.3	2.5614	0.0052126	0.99479	0.010425	0.094906	FALSE
TAF8_8	TAF8	517.31/1113.4/896.49	448.55/551.41/77.299	896.49	448.55	-0.99743	95406	30656	2.5584	0.0052577	0.99474	0.010515	0.095431	FALSE
ZNF213_9	ZNF213	2722.5/2148.7/2423.2	1545.5/1684.2/2163.3	2423.2	1684.2	-0.52462	82455	83450	2.5584	0.0052583	0.99474	0.010517	0.095431	FALSE
C2CD4A_10	C2CD4A	444.83/436.02/399.34	328.2/125.87/114.32	436.02	125.87	-1.7844	711.5	14834	2.5577	0.005269	0.99473	0.010538	0.095484	FALSE
UPF1_8	UPF1	144.05/371.42/364.04	83.543/179.81/59.88	364.04	83.543	-2.1103	24225	12369	2.5553	0.0053046	0.9947	0.010609	0.096058	FALSE
SCARB1_5	SCARB1	874.27/588.53/1070.8	432.63/258.92/553.07	874.27	432.63	-1.0132	60132	29890	2.5544	0.0053178	0.99468	0.010636	0.096226	FALSE
AMTN_7	AMTN	28.991/94.201/49.274	0/0/34.839	49.274	0	-5.6517	1214.9	1650.6	2.5521	0.0053532	0.99465	0.010706	0.096793	FALSE
CCT8_9	CCT8	94.221/106.76/214.75	235.71/3.5961/1.0887	106.76	3.5961	-4.5513	5909	3596.1	2.5508	0.005374	0.99463	0.010748	0.096955	FALSE
ZBTB10_15	ZBTB10	254.58/636.98/959	240.68/556.2/261.29	636.98	261.29	-1.2823	124960	21729	2.5491	0.0053998	0.9946	0.0108	0.097184	FALSE
HYPK_11	HYPK	48.923/110.35/44.126	0/0/178.55	48.923	0	-5.6416	1898.2	1638.8	2.5487	0.0054056	0.99459	0.010811	0.097184	FALSE
WDR37_5	WDR37	318.9/517.66/554.52	176.04/444.72/179.64	517.66	179.64	-1.5217	20431	17633	2.5486	0.0054072	0.99459	0.010814	0.097184	FALSE
PPIL2_13	PPIL2	269.98/336.43/410.37	69.619/53.942/229.72	336.43	69.619	-2.2565	4941.4	11425	2.5454	0.0054574	0.99454	0.010915	0.097737	FALSE
DENND4A_9	DENND4A	204.75/445.89/365.51	85.532/51.545/271.09	365.51	85.532	-2.0825	16152	12419	2.5439	0.0054808	0.99452	0.010962	0.098084	FALSE
HNF4A_3	HNF4A	687.63/741.95/722.93	254.61/323.65/323.35	722.93	323.35	-1.1583	803.68	24683	2.5435	0.0054881	0.99451	0.010976	0.098143	FALSE
MPDU1_15	MPDU1	537.24/583.15/846.48	224.77/215.77/258.03	583.15	224.77	-1.3715	35725	19880	2.5429	0.0054974	0.9945	0.010995	0.098238	FALSE
DHX36_13	DHX36	464.77/357.07/563.34	355.06/99.493/145.89	464.77	145.89	-1.6649	10658	15819	2.5422	0.005508	0.99449	0.011016	0.098354	FALSE
EIF6_7	EIF6	120.49/51.138/0	105.42/0/1.0887	51.138	1.0887	-4.6416	3712.7	1713.5	2.5379	0.0055759	0.99442	0.011152	0.098898	FALSE
POLR2E_13	POLR2E	131.37/54.726/21.328	68.625/1.1987/0	54.726	1.1987	-4.6636	3494.6	1834.7	2.5372	0.0055871	0.99441	0.011174	0.098898	FALSE
EIF2S2_6	EIF2S2	92.409/54.726/50.745	38.788/1.1987/0	54.726	1.1987	-4.6636	717.93	1834.7	2.5372	0.0055871	0.99441	0.011174	0.098898	FALSE
GPN3_3	GPN3	544.49/276.32/531.72	319.25/190.6/144.8	531.72	190.6	-1.4753	32694	18115	2.5369	0.0055919	0.99441	0.011184	0.098912	FALSE
KBTBD12_10	KBTBD12	414.03/480.87/316.97	115.37/532.23/87.098	414.03	115.37	-1.8345	6944.4	14081	2.5315	0.0056784	0.99432	0.011357	0.09972	FALSE
WDHD1_14	WDHD1	46.205/170.46/47.068	0/239.74/0	47.068	0	-5.587	7613.1	1576.2	2.5305	0.0056943	0.99431	0.011389	0.099854	FALSE
HYOU1_9	HYOU1	132.27/17.943/47.068	27.848/0/0	47.068	0	-5.587	4054	1576.2	2.5305	0.0056943	0.99431	0.011389	0.099854	FALSE
KDM6A_14	KDM6A	614.25/936.63/1180.4	524.13/443.52/484.48	936.63	484.48	-0.9496	81668	32038	2.5261	0.0057673	0.99423	0.011535	0.10084	FALSE
PPIAL4A_8	PPIAL4A	86.974/286.19/212.54	20.886/43.154/2.1775	212.54	20.886	-3.2864	10596	7194.1	2.521	0.0058509	0.99415	0.011702	0.10179	FALSE
UBE2I_9	UBE2I	853.43/1167.2/1074.5	585.8/590.97/746.87	1074.5	590.97	-0.86137	28728	36789	2.5208	0.0058545	0.99415	0.011709	0.10179	FALSE
TBX1_14	TBX1	732.03/726.7/482.44	322.24/691.66/329.88	726.7	329.88	-1.137	29844	24813	2.5192	0.0058805	0.99412	0.011761	0.10195	FALSE
TCERG1_3	TCERG1	331.59/359.76/186.8	69.619/179.81/59.88	331.59	69.619	-2.2356	10879	11259	2.5185	0.0058933	0.99411	0.011787	0.10206	FALSE
SUMO2_6	SUMO2	1111.6/1137.6/1127.4	632.54/445.92/698.96	1127.4	632.54	-0.83279	176.36	38615	2.5184	0.0058951	0.9941	0.01179	0.10206	FALSE
MGAT1_6	MGAT1	909.6/565.21/853.1	423.68/900.23/290.69	853.1	423.68	-1.008	43037	29162	2.5146	0.0059577	0.99404	0.011915	0.1027	FALSE
RCC1_15	RCC1	116.87/52.035/0	140.23/1.1987/1.0887	52.035	1.1987	-4.5922	3455.7	1743.8	2.512	0.0060018	0.994	0.012004	0.10323	FALSE
GREB1L_12	GREB1L	681.29/820.9/497.89	349.09/104.29/298.31	681.29	298.31	-1.1887	26563	23252	2.5118	0.0060053	0.99399	0.012011	0.10323	FALSE
NonTargeting_Human_0068	NonTargeting_Human_0068	1945.1/1845.4/984.01	1213.4/1116/1478.5	1845.4	1213.4	-0.60455	376010	63430	2.5097	0.0060409	0.99396	0.012082	0.1037	FALSE
NUDT21_7	NUDT21	134.99/23.326/44.861	91.5/0/0	44.861	0	-5.5192	4293.5	1501.8	2.5083	0.0060662	0.99393	0.012132	0.10406	FALSE
FNDC3B_14	FNDC3B	364.2/325.67/492.74	62.657/88.705/144.8	364.2	88.705	-2.0254	9003.4	12375	2.506	0.0061057	0.99389	0.012211	0.10437	FALSE
RHOT2_8	RHOT2	327.06/630.7/623.65	258.59/270.91/241.7	623.65	258.59	-1.2668	44007	21271	2.5036	0.0061468	0.99385	0.012294	0.10489	FALSE
TAF2_7	TAF2	383.23/579.56/465.53	151.17/172.61/76.211	465.53	151.17	-1.6163	9888.6	15845	2.5035	0.0061491	0.99385	0.012298	0.10489	FALSE
URI1_9	URI1	246.43/278.12/225.04	28.842/234.95/32.662	246.43	32.662	-2.8778	730.84	8349.8	2.5017	0.0061797	0.99382	0.012359	0.10523	FALSE
ALG2_10	ALG2	754.68/425.25/398.6	520.15/125.87/58.791	425.25	125.87	-1.7484	54616	14465	2.5007	0.0061981	0.9938	0.012396	0.10529	FALSE
DNLZ_5	DNLZ	246.43/273.63/101.49	32.82/0/115.4	246.43	32.82	-2.871	10873	8349.8	2.4991	0.0062249	0.99378	0.01245	0.10535	FALSE
GP1BB_6	GP1BB	895.1/1134/1361.3	641.49/210.97/991.83	1134	641.49	-0.82095	54365	38842	2.499	0.0062273	0.99377	0.012455	0.10535	FALSE
RICTOR_10	RICTOR	168.51/43.961/32.359	0/35.961/0	43.961	0	-5.4906	7823.7	1471.5	2.499	0.0062278	0.99377	0.012456	0.10535	FALSE
NUDT17_7	NUDT17	308.94/586.74/188.27	52.712/59.936/286.33	308.94	59.936	-2.3466	45867	10485	2.498	0.0062445	0.99376	0.012489	0.10556	FALSE
SULT1A2_8	SULT1A2	525.47/307.72/686.89	119.35/192.99/191.62	525.47	191.62	-1.4506	36735	17901	2.4977	0.0062504	0.99375	0.012501	0.10559	FALSE
RAB10_1	RAB10	633.28/352.58/520.69	188.97/175.01/348.39	520.69	188.97	-1.4574	20468	17737	2.4933	0.0063272	0.99367	0.012654	0.10632	FALSE
NCBP1_1	NCBP1	255.48/0/43.39	0/0/0	43.39	0	-5.4722	23433	1452.2	2.493	0.0063332	0.99367	0.012666	0.10632	FALSE
SNRPD1_2	SNRPD1	98.751/0/43.39	0/0/54.436	43.39	0	-5.4722	2473.8	1452.2	2.493	0.0063332	0.99367	0.012666	0.10632	FALSE
MEF2BNB_1	MEF2BNB	753.77/584.05/670.71	379.92/293.69/191.62	670.71	293.69	-1.1887	7204.8	22888	2.4924	0.0063446	0.99366	0.012689	0.10644	FALSE
C9orf41_6	C9orf41	240.08/369.63/328.74	183.99/70.724/54.436	328.74	70.724	-2.2008	4765.8	11162	2.4907	0.0063749	0.99363	0.01275	0.10688	FALSE
MPDU1_3	MPDU1	502.82/792.19/300.79	241.68/112.68/177.46	502.82	177.46	-1.4973	62275	17124	2.4897	0.006393	0.99361	0.012786	0.1069	FALSE
TAF1_7	TAF1	91.503/43.063/42.655	0/0/20.686	43.063	0	-5.4615	1173.3	1441.2	2.4896	0.0063949	0.99361	0.01279	0.1069	FALSE
CERS2_7	CERS2	824.44/738.36/766.32	520.15/226.56/363.63	766.32	363.63	-1.0734	2079.7	26175	2.489	0.0064047	0.9936	0.012809	0.1069	FALSE
SETD1A_15	SETD1A	409.5/370.52/404.49	114.37/81.513/346.21	404.49	114.37	-1.8133	589.29	13754	2.489	0.0064056	0.99359	0.012811	0.1069	FALSE
CAND1_3	CAND1	638.71/547.26/507.45	207.86/323.65/172.02	547.26	207.86	-1.3923	4974.1	18649	2.4871	0.0064403	0.99356	0.012881	0.107	FALSE
GINS2_2	GINS2	97.845/177.64/28.682	123.33/3.5961/0	97.845	3.5961	-4.4267	5575.1	3293.7	2.4866	0.0064482	0.99355	0.012896	0.107	FALSE
SCAP_6	SCAP	728.4/622.63/622.91	260.57/330.85/201.41	622.91	260.57	-1.2541	5564.5	21246	2.4864	0.0064525	0.99355	0.012905	0.107	FALSE
SRCAP_7	SRCAP	675.86/675.56/753.82	266.54/438.73/298.31	675.86	298.31	-1.1772	3038.9	23065	2.4862	0.0064558	0.99354	0.012912	0.107	FALSE
FER_13	FER	720.25/732.98/892.08	236.71/975.75/339.68	732.98	339.68	-1.1073	12738	25029	2.4861	0.0064579	0.99354	0.012916	0.107	FALSE
CCDC53_5	CCDC53	587.98/463.83/181.65	60.668/152.24/201.41	463.83	152.24	-1.6009	47519	15787	2.486	0.0064598	0.99354	0.01292	0.107	FALSE
MED26_12	MED26	346.08/234.16/431.7	182/65.929/80.566	346.08	80.566	-2.0892	9928.6	11755	2.4859	0.0064615	0.99354	0.012923	0.107	FALSE
CERS2_2	CERS2	223.78/373.22/483.18	97.467/292.49/26.129	373.22	97.467	-1.9262	17212	12683	2.4721	0.0067158	0.99328	0.013432	0.11022	FALSE
EXOC1_10	EXOC1	444.83/501.51/455.97	149.18/293.69/145.89	455.97	149.18	-1.6054	1099	15517	2.4693	0.0067685	0.99323	0.013537	0.11059	FALSE
TAF1_11	TAF1	314.37/286.19/261.08	51.717/0/125.2	286.19	51.717	-2.4457	712.45	9707.6	2.4658	0.0068354	0.99316	0.013671	0.11138	FALSE
WDR37_11	WDR37	448.46/853.19/1034.8	478.38/358.42/432.22	853.19	432.22	-0.97945	98387	29165	2.465	0.00685	0.99315	0.0137	0.11147	FALSE
RPS8_4	RPS8	0/40.372/154.44	0/0/91.453	40.372	0	-5.3706	7320.8	1350.5	2.4606	0.0069361	0.99306	0.013872	0.1125	FALSE
WRB_14	WRB	502.82/254.79/462.59	279.47/154.63/136.09	462.59	154.63	-1.5747	22398	15744	2.4601	0.0069458	0.99305	0.013892	0.11258	FALSE
TM9SF2_14	TM9SF2	416.75/984.18/701.6	192.94/321.26/361.46	701.6	321.26	-1.1245	80496	23950	2.4578	0.0069888	0.99301	0.013978	0.1132	FALSE
SRCAP_1	SRCAP	304.41/558.93/572.17	210.85/270.91/219.92	558.93	219.92	-1.3417	32478	19049	2.4576	0.0069943	0.99301	0.013989	0.11322	FALSE
AXIN1_12	AXIN1	315.28/466.52/49.274	206.87/67.128/57.702	315.28	67.128	-2.2149	46816	10702	2.4532	0.0070796	0.99292	0.014159	0.11407	FALSE
EWSR1_13	EWSR1	524.56/565.21/469.94	339.14/175.01/197.06	524.56	197.06	-1.4079	2317.7	17869	2.4521	0.0071007	0.9929	0.014201	0.11422	FALSE
NHLRC2_1	NHLRC2	472.01/569.69/97.812	363.01/161.83/41.372	472.01	161.83	-1.5385	74784	16067	2.452	0.0071033	0.9929	0.014207	0.11422	FALSE
URI1_11	URI1	195.69/506/463.32	156.15/105.49/297.22	463.32	156.15	-1.563	36724	15769	2.4517	0.0071086	0.99289	0.014217	0.11423	FALSE
EXOC1_8	EXOC1	398.63/893.57/324.33	198.91/115.08/92.542	398.63	115.08	-1.7836	125240	13553	2.4508	0.0071265	0.99287	0.014253	0.11445	FALSE
RUVBL1_3	RUVBL1	18.119/39.475/77.956	36.799/0/0	39.475	0	-5.339	968.41	1320.3	2.4506	0.0071312	0.99287	0.014262	0.11445	FALSE
RAB10_6	RAB10	649.58/1410.3/696.45	813.55/40.756/319	696.45	319	-1.124	255910	23773	2.4482	0.0071777	0.99282	0.014355	0.11512	FALSE
MBTPS1_15	MBTPS1	408.59/539.19/643.5	207.86/318.86/165.49	539.19	207.86	-1.3709	13968	18371	2.4462	0.0072187	0.99278	0.014437	0.11546	FALSE
PTAR1_7	PTAR1	264.54/136.37/300.79	113.38/25.173/43.549	264.54	43.549	-2.5755	8871.6	8968.3	2.4462	0.0072195	0.99278	0.014439	0.11546	FALSE
PRELP_12	PRELP	793.63/585.84/881.05	390.86/366.81/730.53	793.63	390.86	-1.0199	25409	27115	2.446	0.0072222	0.99278	0.014444	0.11546	FALSE
CPSF2_1	CPSF2	92.409/35.886/211.8	67.63/3.5961/0	92.409	3.5961	-4.3451	8725	3109.5	2.4459	0.0072254	0.99277	0.014451	0.11546	FALSE
TMEM30A_10	TMEM30A	1218.5/618.14/632.47	231.73/273.31/336.42	632.47	273.31	-1.2075	171840	21574	2.4457	0.007229	0.99277	0.014458	0.11546	FALSE
RPL13A_11	RPL13A	33.521/48.446/38.978	81.554/0/0	38.978	0	-5.3211	59.714	1303.6	2.445	0.0072427	0.99276	0.014485	0.11546	FALSE
GTF2E1_11	GTF2E1	539.06/350.79/554.52	240.68/65.929/207.95	539.06	207.95	-1.37	17842	18367	2.4449	0.0072449	0.99276	0.01449	0.11546	FALSE
SCAP_12	SCAP	727.5/625.32/564.81	204.88/268.51/334.24	625.32	268.51	-1.2165	7050.9	21328	2.4436	0.0072705	0.99273	0.014541	0.11575	FALSE
MPDU1_5	MPDU1	615.16/308.62/712.63	296.38/261.32/176.37	615.16	261.32	-1.232	51733	20979	2.4434	0.007274	0.99273	0.014548	0.11575	FALSE
SREBF2_10	SREBF2	982.08/883.7/725.87	716.08/369.2/459.44	883.7	459.44	-0.94216	17294	30215	2.4407	0.0073292	0.99267	0.014658	0.1164	FALSE
HAVCR1_5	HAVCR1	491.04/522.14/255.93	176.04/161.83/313.55	491.04	176.04	-1.4747	28122	16720	2.4397	0.0073504	0.99265	0.014701	0.11652	FALSE
ACTR6_15	ACTR6	319.81/394.75/157.38	128.3/31.167/70.767	319.81	70.767	-2.1603	15999	10856	2.4394	0.0073554	0.99264	0.014711	0.11652	FALSE
NonTargeting_Human_0107	NonTargeting_Human_0107	1156.9/1021.9/1242.1	671.33/649.7/1607	1156.9	671.33	-0.78431	12753	39633	2.4392	0.0073595	0.99264	0.014719	0.11652	FALSE
EML4_10	EML4	655.93/592.12/418.46	245.66/764.78/207.95	592.12	245.66	-1.2658	17115	20188	2.4392	0.0073604	0.99264	0.014721	0.11652	FALSE
CERS2_12	CERS2	530/613.65/353.74	244.66/202.58/77.299	530	202.58	-1.3831	19032	18056	2.4385	0.0073732	0.99263	0.014746	0.11657	FALSE
ACTR3_10	ACTR3	19.025/77.155/38.242	0/0/45.726	38.242	0	-5.2943	941.75	1278.8	2.4366	0.0074124	0.99259	0.014825	0.11696	FALSE
SPSB3_7	SPSB3	951.27/1233.6/1380.4	1202.4/572.99/732.71	1233.6	732.71	-0.75074	50628	42279	2.436	0.0074261	0.99257	0.014852	0.1171	FALSE
RNPEP_9	RNPEP	734.75/843.33/921.5	419.7/449.52/430.05	843.33	430.05	-0.96996	8950.1	28825	2.4342	0.007462	0.99254	0.014924	0.11736	FALSE
INTS1_3	INTS1	846.18/760.79/347.86	456.5/255.33/369.08	760.79	369.08	-1.0416	88901	25985	2.43	0.0075488	0.99245	0.015098	0.1184	FALSE
PIAS1_2	PIAS1	188.44/338.23/220.63	27.848/0/46.815	220.63	27.848	-2.9416	7432.6	7469.9	2.4299	0.0075524	0.99245	0.015105	0.1184	FALSE
GAGE12B_4	GAGE12B	816.28/711.44/619.97	305.33/333.24/541.1	711.44	333.24	-1.0919	9679.5	24288	2.4269	0.0076149	0.99239	0.01523	0.11892	FALSE
VPS35_14	VPS35	597.94/644.16/361.83	283.45/251.73/188.35	597.94	251.73	-1.2448	28942	20388	2.4253	0.007647	0.99235	0.015294	0.1193	FALSE
GTF2A2_10	GTF2A2	100.56/80.744/58.099	2.9837/8.391/0	80.744	2.9837	-4.3589	452.8	2714.4	2.4253	0.0076487	0.99235	0.015297	0.1193	FALSE
TSPAN11_6	TSPAN11	171.23/758.1/669.98	303.34/600.56/276.54	669.98	303.34	-1.1406	128260	22863	2.425	0.0076543	0.99235	0.015309	0.11931	FALSE
COMMD3_3	COMMD3	780.95/488.05/447.14	176.04/33.564/248.23	488.05	176.04	-1.4659	43731	16617	2.424	0.0076748	0.99233	0.01535	0.11941	FALSE
ZNF263_12	ZNF263	622.4/785.01/356.68	269.53/256.52/573.76	622.4	269.53	-1.2044	48524	21228	2.4224	0.0077088	0.99229	0.015418	0.11978	FALSE
PRPF38B_12	PRPF38B	107.81/305.03/308.15	64.646/39.558/214.48	305.03	64.646	-2.2209	19453	10351	2.4218	0.0077229	0.99228	0.015446	0.11984	FALSE
RNF151_3	RNF151	491.04/621.73/381.69	286.43/178.61/115.4	491.04	178.61	-1.4539	14519	16720	2.4196	0.0077686	0.99223	0.015537	0.12034	FALSE
EXOC1_1	EXOC1	376.89/673.76/316.97	122.33/100.69/105.61	376.89	105.61	-1.8257	45863	12809	2.4165	0.007835	0.99217	0.01567	0.12115	FALSE
NonTargeting_Human_0799	NonTargeting_Human_0799	130.46/447.68/480.24	138.24/258.92/150.24	447.68	150.24	-1.5688	50844	15233	2.4164	0.0078368	0.99216	0.015674	0.12115	FALSE
SNRPD1_1	SNRPD1	274.51/135.47/286.08	194.93/50.346/34.839	274.51	50.346	-2.4238	9733	9308.6	2.4146	0.0078772	0.99212	0.015754	0.12139	FALSE
ZBTB8OS_2	ZBTB8OS	443.93/463.83/448.61	151.17/257.72/91.453	448.61	151.17	-1.563	126.74	15265	2.4138	0.0078935	0.99211	0.015787	0.12142	FALSE
CDIPT_9	CDIPT	423.09/949.19/447.14	264.55/83.91/150.24	447.14	150.24	-1.5671	126320	15215	2.4135	0.0078993	0.9921	0.015799	0.12142	FALSE
SAFB_12	SAFB	359.67/628.91/297.85	294.39/81.513/95.808	359.67	95.808	-1.8975	38154	12220	2.4122	0.0079285	0.99207	0.015857	0.12177	FALSE
TMEM30A_1	TMEM30A	312.56/291.58/186.06	10.94/122.27/58.791	291.58	58.791	-2.2908	5786.5	9891.5	2.411	0.0079548	0.99205	0.01591	0.12189	FALSE
GREB1L_3	GREB1L	570.76/600.2/280.2	234.72/92.301/307.02	570.76	234.72	-1.2784	42647	19455	2.4102	0.0079711	0.99203	0.015942	0.12207	FALSE
DNLZ_1	DNLZ	635.99/532.91/669.98	281.46/55.141/298.31	635.99	281.46	-1.1732	5890.6	21695	2.4074	0.0080343	0.99197	0.016069	0.1228	FALSE
NELFB_4	NELFB	282.66/445.89/530.25	496.29/53.942/150.24	445.89	150.24	-1.563	16879	15172	2.4068	0.0080471	0.99195	0.016094	0.12286	FALSE
VPS29_10	VPS29	592.51/601.99/573.64	106.42/250.53/288.51	592.51	250.53	-1.2385	223.03	20202	2.4067	0.008048	0.99195	0.016096	0.12286	FALSE
EXOC4_1	EXOC4	339.74/211.73/371.39	180.02/85.109/29.396	339.74	85.109	-1.9844	8694.5	11538	2.4041	0.0081061	0.99189	0.016212	0.12322	FALSE
RCC1_6	RCC1	238.27/102.28/230.19	47.739/0/32.662	230.19	32.662	-2.7799	8213.7	7795.9	2.404	0.0081092	0.99189	0.016218	0.12322	FALSE
GPN1_4	GPN1	576.2/886.39/1248	375.94/575.38/468.15	886.39	468.15	-0.91951	113500	30308	2.4024	0.0081439	0.99186	0.016288	0.12325	FALSE
HSPE1_1	HSPE1	35.333/55.624/30.153	0/0/0	35.333	0	-5.1832	219.27	1180.9	2.4024	0.0081443	0.99186	0.016289	0.12325	FALSE
CCDC115_3	CCDC115	330.68/34.989/235.34	34.81/67.128/0	235.34	34.81	-2.7224	24615	7971.5	2.4003	0.0081909	0.99181	0.016382	0.12372	FALSE
DENND4A_15	DENND4A	475.64/469.21/355.95	145.21/166.62/252.58	469.21	166.62	-1.4881	6434.9	15971	2.3988	0.0082237	0.99178	0.016447	0.12406	FALSE
ZBTB8OS_15	ZBTB8OS	508.25/185.71/601.58	398.82/192.99/107.78	508.25	192.99	-1.3924	56372	17310	2.3986	0.0082281	0.99177	0.016456	0.12406	FALSE
SSX2_7	SSX2	501/816.41/642.03	320.25/176.21/287.42	642.03	287.42	-1.1567	25148	21903	2.3964	0.0082786	0.99172	0.016557	0.12459	FALSE
WRB_15	WRB	458.42/620.83/338.3	160.12/113.88/210.12	458.42	160.12	-1.5117	20403	15602	2.3934	0.0083457	0.99165	0.016691	0.12529	FALSE
IREB2_6	IREB2	755.58/844.22/686.89	371.97/1047.7/370.17	755.58	371.97	-1.0205	6287.7	25806	2.3881	0.0084685	0.99153	0.016937	0.1269	FALSE
ATP6AP2_9	ATP6AP2	43.487/34.092/0	0/0/37.017	34.092	0	-5.1331	625.26	1139.1	2.3872	0.0084896	0.99151	0.016979	0.12714	FALSE
CABIN1_12	CABIN1	638.71/1454.3/910.46	489.32/377.6/861.18	910.46	489.32	-0.89445	184800	31137	2.3867	0.0085012	0.9915	0.017002	0.12715	FALSE
RAB7A_13	RAB7A	298.97/261.07/310.35	64.646/44.352/211.21	298.97	64.646	-2.192	782.95	10144	2.3862	0.0085108	0.99149	0.017022	0.12719	FALSE
TCERG1_10	TCERG1	495.57/667.48/327.27	185.98/187/183.99	495.57	185.98	-1.4091	28940	16875	2.3861	0.0085142	0.99149	0.017028	0.12719	FALSE
PGA3_5	PGA3	0/103.17/33.83	61.663/0/0	33.83	0	-5.1223	2976.5	1130.3	2.3839	0.0085653	0.99143	0.017131	0.12785	FALSE
PIM2_1	PIM2	491.94/770.66/541.28	181.01/219.36/217.75	541.28	217.75	-1.3098	27524	18443	2.3838	0.0085685	0.99143	0.017137	0.12785	FALSE
EIF3C_11	EIF3C	61.606/101.38/0	73.597/1.1987/2.1775	61.606	2.1775	-4.3004	2688.6	2067	2.3808	0.0086365	0.99136	0.017273	0.12859	FALSE
CMTR1_7	CMTR1	520.03/227.88/503.04	115.37/191.79/346.21	503.04	191.79	-1.3865	38000	17131	2.3805	0.0086443	0.99136	0.017289	0.12859	FALSE
RPL13A_8	RPL13A	33.521/28.709/97.812	0/14.385/0	33.521	0	-5.1094	2078.3	1119.9	2.38	0.0086558	0.99134	0.017312	0.12868	FALSE
USP22_4	USP22	471.11/616.35/731.75	271.51/227.76/700.05	616.35	271.51	-1.1797	17207	21020	2.3789	0.0086832	0.99132	0.017366	0.12892	FALSE
PKD1_13	PKD1	668.61/338.23/589.82	631.55/87.506/252.58	589.82	252.58	-1.2202	34753	20109	2.3788	0.0086851	0.99131	0.01737	0.12892	FALSE
HYOU1_7	HYOU1	691.26/742.84/559.66	326.22/294.88/424.6	691.26	326.22	-1.0811	9989.2	23594	2.3767	0.0087351	0.99126	0.01747	0.12946	FALSE
NonTargeting_Human_0957	NonTargeting_Human_0957	38.957/15.252/112.52	132.28/1.1987/0	38.957	1.1987	-4.1837	2986.8	1302.9	2.3755	0.0087615	0.99124	0.017523	0.12958	FALSE
PIAS1_3	PIAS1	720.25/509.58/450.08	145.21/213.37/197.06	509.58	197.06	-1.3662	23960	17356	2.3745	0.0087854	0.99121	0.017571	0.12967	FALSE
BTF3_14	BTF3	372.36/269.15/405.22	107.41/46.75/190.53	372.36	107.41	-1.784	5866.2	12654	2.3743	0.0087922	0.99121	0.017584	0.12967	FALSE
CSNK1A1_13	CSNK1A1	506.44/341.82/104.43	202.89/0/89.275	341.82	89.275	-1.925	41726	11609	2.3742	0.008793	0.99121	0.017586	0.12967	FALSE
RNMT_10	RNMT	340.65/283.5/332.41	100.45/83.91/54.436	332.41	83.91	-1.9733	1230.2	11287	2.3741	0.0087968	0.9912	0.017594	0.12967	FALSE
PAGE4_3	PAGE4	733.84/505.1/397.13	183.99/194.19/350.57	505.1	194.19	-1.3745	31990	17202	2.3729	0.0088235	0.99118	0.017647	0.12975	FALSE
RBM14_15	RBM14	527.28/554.44/204.45	309.31/209.78/119.76	527.28	209.78	-1.3256	52478	17963	2.3707	0.0088773	0.99112	0.017755	0.1303	FALSE
KDM6A_12	KDM6A	372.36/312.21/536.86	92.494/107.88/174.2	372.36	107.88	-1.7778	15340	12654	2.3699	0.0088972	0.9911	0.017794	0.13052	FALSE
CWC22_11	CWC22	32.615/56.521/0	0/121.07/0	32.615	0	-5.071	817.61	1089.4	2.3685	0.0089299	0.99107	0.01786	0.13075	FALSE
DPAGT1_1	DPAGT1	0/32.298/92.664	20.886/0/0	32.298	0	-5.0573	2343.6	1078.7	2.3644	0.0090291	0.99097	0.018058	0.13158	FALSE
SRCAP_9	SRCAP	973.92/904.33/631	395.83/489.08/616.22	904.33	489.08	-0.88544	39777	30926	2.3613	0.0091048	0.9909	0.01821	0.13229	FALSE
CEBPA_11	CEBPA	421.28/336.43/279.46	87.521/137.85/78.388	336.43	87.521	-1.9305	5222.1	11425	2.3607	0.0091207	0.99088	0.018241	0.13244	FALSE
SETDB1_15	SETDB1	225.59/685.43/667.77	300.36/311.67/819.81	667.77	311.67	-1.0969	97919	22787	2.3592	0.0091563	0.99084	0.018313	0.1328	FALSE
GAGE1_14	GAGE1	635.09/453.06/408.16	161.12/216.97/135	453.06	161.12	-1.4858	17575	15418	2.3564	0.0092262	0.99077	0.018452	0.13334	FALSE
UBE2I_7	UBE2I	559.89/318.49/536.86	218.8/67.128/330.97	536.86	218.8	-1.291	24109	18292	2.3531	0.0093079	0.99069	0.018616	0.13412	FALSE
BTF3_1	BTF3	283.57/351.68/61.776	59.674/0/90.364	283.57	59.674	-2.2296	26916	9618	2.3528	0.0093159	0.99068	0.018632	0.13416	FALSE
SAP130_1	SAP130	817.19/794.88/703.81	553.97/279.3/407.18	794.88	407.18	-0.96333	4395.9	27158	2.3526	0.0093214	0.99068	0.018643	0.13416	FALSE
CPSF3L_2	CPSF3L	134.08/65.492/170.62	68.625/0/9.7985	134.08	9.7985	-3.645	3019.9	4523.7	2.3484	0.0094278	0.99057	0.018856	0.13541	FALSE
DNAJC13_1	DNAJC13	394.1/448.58/533.92	219.8/159.43/72.945	448.58	159.43	-1.4866	5125.9	15264	2.3458	0.0094924	0.99051	0.018985	0.13614	FALSE
SREBF2_7	SREBF2	193.88/612.76/506.71	198.91/157.03/296.13	506.71	198.91	-1.3446	54555	17257	2.3453	0.0095064	0.99049	0.019013	0.13626	FALSE
SREBF2_4	SREBF2	1297.4/1009.3/977.39	537.06/574.18/893.84	1009.3	574.18	-0.81269	41998	34542	2.3411	0.0096123	0.99039	0.019225	0.13744	FALSE
MBTPS1_12	MBTPS1	445.74/487.16/322.85	158.14/59.936/213.39	445.74	158.14	-1.4892	8408	15167	2.341	0.009617	0.99038	0.019234	0.13744	FALSE
PFDN6_3	PFDN6	0.90597/30.503/148.56	0/51.545/0	30.503	0	-4.9774	7406.4	1018.4	2.3407	0.0096228	0.99038	0.019246	0.13744	FALSE
MED1_7	MED1	212/305.03/355.95	141.23/71.923/34.839	305.03	71.923	-2.0692	5623.9	10351	2.3404	0.0096307	0.99037	0.019261	0.13748	FALSE
CTNNBIP1_10	CTNNBIP1	792.73/334.64/722.19	425.67/354.82/310.29	722.19	354.82	-1.0232	77587	24658	2.3396	0.0096516	0.99035	0.019303	0.13769	FALSE
ERP44_3	ERP44	870.64/608.27/990.63	546.01/467.5/341.86	870.64	467.5	-0.89569	41617	29766	2.3367	0.0097274	0.99027	0.019455	0.13861	FALSE
CLK2_10	CLK2	468.39/256.59/580.99	174.05/165.42/375.61	468.39	174.05	-1.423	28770	15943	2.335	0.0097709	0.99023	0.019542	0.13899	FALSE
FAM57B_14	FAM57B	483.79/652.23/495.68	245.66/151.04/192.7	495.68	192.7	-1.3585	12325	16879	2.3346	0.0097819	0.99022	0.019564	0.13907	FALSE
AHSP_4	AHSP	628.75/439.61/633.94	264.55/751.59/287.42	628.75	287.42	-1.1266	17901	21446	2.3311	0.0098753	0.99012	0.019751	0.14007	FALSE
DYRK1A_13	DYRK1A	1052.7/649.54/817.06	586.79/427.94/271.09	817.06	427.94	-0.93143	41804	27921	2.3287	0.0099363	0.99006	0.019873	0.14055	FALSE
RAB10_2	RAB10	86.974/333.74/292.7	197.92/0/66.412	292.7	66.412	-2.1233	22004	9929.9	2.3287	0.0099388	0.99006	0.019878	0.14055	FALSE
SIN3B_10	SIN3B	237.37/123.81/255.19	50.723/26.372/40.283	237.37	40.283	-2.5296	6606.7	8040.7	2.3278	0.0099605	0.99004	0.019921	0.1407	FALSE
XAGE1A_13	XAGE1A	667.7/803.85/997.98	393.85/418.35/483.39	803.85	418.35	-0.94056	28111	27467	2.3261	0.010007	0.98999	0.020014	0.14119	FALSE
TMEM165_12	TMEM165	846.18/905.23/889.87	785.7/450.72/484.48	889.87	484.48	-0.8758	1072.4	30428	2.324	0.010063	0.98994	0.020125	0.14171	FALSE
SPNS1_11	SPNS1	1087.2/1243.5/662.62	881.18/638.91/267.83	1087.2	638.91	-0.76595	102330	37227	2.3233	0.010083	0.98992	0.020166	0.14177	FALSE
GDI2_14	GDI2	682.2/660.31/502.3	360.03/311.67/216.66	660.31	311.67	-1.0807	12723	22530	2.3229	0.010092	0.98991	0.020185	0.14177	FALSE
FAM57B_11	FAM57B	91.503/456.65/518.48	24.864/251.73/167.66	456.65	167.66	-1.4401	68578	15541	2.3227	0.010097	0.9899	0.020194	0.14177	FALSE
MARS2_3	MARS2	415.84/310.42/360.36	338.15/77.916/105.61	360.36	105.61	-1.7611	2786.4	12243	2.3226	0.0101	0.9899	0.020199	0.14177	FALSE
ATP6V1B1_15	ATP6V1B1	439.4/159.69/367.72	603.7/110.28/100.16	367.72	110.28	-1.7283	24206	12495	2.321	0.010142	0.98986	0.020285	0.1422	FALSE
GPN1_1	GPN1	28.991/0/30.153	0/37.16/0	28.991	0	-4.9065	420.92	967.55	2.32	0.010171	0.98983	0.020343	0.14245	FALSE
TMEM253_6	TMEM253	633.28/769.76/803.09	393.85/716.83/319	769.76	393.85	-0.96499	9869.2	26294	2.3183	0.010217	0.98978	0.020433	0.14297	FALSE
SSX2_5	SSX2	148.58/256.59/227.25	36.799/118.67/0	227.25	36.799	-2.5942	3524.7	7695.6	2.3181	0.010223	0.98978	0.020445	0.14297	FALSE
LIMS3_12	LIMS3	0/158.8/51.48	1.9891/53.942/0	51.48	1.9891	-4.134	7083.5	1725.1	2.3179	0.010228	0.98977	0.020456	0.14297	FALSE
GPN1_3	GPN1	557.17/508.69/233.87	203.88/203.78/353.84	508.69	203.88	-1.3148	38938	17325	2.3177	0.010232	0.98977	0.020465	0.14297	FALSE
VPS35_1	VPS35	298.97/387.57/172.83	80.559/70.724/39.194	298.97	70.724	-2.0643	11881	10144	2.3175	0.010238	0.98976	0.020476	0.14297	FALSE
PIGQ_5	PIGQ	843.46/1098.1/1209.8	691.22/616.14/648.88	1098.1	648.88	-0.7581	38659	37605	2.3166	0.010262	0.98974	0.020524	0.14306	FALSE
GTF2H3_3	GTF2H3	60.7/0/28.682	0/1.1987/0	28.682	0	-4.8915	923.92	957.15	2.3156	0.01029	0.98971	0.020579	0.14328	FALSE
OSTC_8	OSTC	177.57/591.22/482.44	369.98/2.3974/186.17	482.44	186.17	-1.369	52390	16425	2.3147	0.010314	0.98969	0.020628	0.14353	FALSE
HMOX2_13	HMOX2	1023.8/850.5/857.51	461.48/653.3/401.74	857.51	461.48	-0.89246	13842	29314	2.3131	0.010357	0.98964	0.020715	0.14382	FALSE
BRD2_3	BRD2	504.63/605.58/587.61	260.57/275.7/239.52	587.61	260.57	-1.1701	3604.4	20033	2.3111	0.010412	0.98959	0.020825	0.14441	FALSE
GREB1L_7	GREB1L	1014.7/773.35/731.02	397.82/286.49/448.55	773.35	397.82	-0.95723	30019	26417	2.3105	0.010431	0.98957	0.020862	0.14459	FALSE
HNF4A_6	HNF4A	171.23/645.95/503.77	201.9/161.83/385.41	503.77	201.9	-1.3149	65400	17156	2.3068	0.010532	0.98947	0.021065	0.14572	FALSE
MPDU1_4	MPDU1	559.89/629.8/626.59	289.42/281.7/425.69	626.59	289.42	-1.1117	2229.3	21372	2.3067	0.010536	0.98946	0.021073	0.14572	FALSE
GINS2_15	GINS2	256.39/476.39/161.06	50.723/198.99/1.0887	256.39	50.723	-2.3151	28744	8689.9	2.2995	0.010738	0.98926	0.021476	0.14813	FALSE
SVOP_13	SVOP	736.56/676.45/491.27	327.21/623.33/262.38	676.45	327.21	-1.0455	18953	23085	2.2987	0.01076	0.98924	0.02152	0.14822	FALSE
EIF6_15	EIF6	97.845/0/52.951	12.929/0/2.1775	52.951	2.1775	-4.0857	2409.7	1774.7	2.2976	0.010792	0.98921	0.021584	0.14835	FALSE
COMMD3_13	COMMD3	627.84/461.14/288.29	164.1/173.81/179.64	461.14	173.81	-1.4025	28833	15695	2.2975	0.010795	0.9892	0.02159	0.14835	FALSE
DNAJC4_3	DNAJC4	412.22/430.63/266.23	141.23/79.115/259.12	412.22	141.23	-1.5387	10826	14019	2.2973	0.0108	0.9892	0.021599	0.14835	FALSE
ATP13A1_2	ATP13A1	150.39/187.51/252.25	157.14/23.974/6.5324	187.51	23.974	-2.9161	2784.8	6341.1	2.296	0.010838	0.98916	0.021676	0.14858	FALSE
MTA2_13	MTA2	492.85/697.09/879.58	452.52/330.85/342.95	697.09	342.95	-1.0212	37507	23795	2.2959	0.01084	0.98916	0.021681	0.14858	FALSE
WDR37_3	WDR37	343.36/388.47/517.01	126.31/312.86/92.542	388.47	126.31	-1.6132	9278.5	13205	2.2936	0.010906	0.98909	0.021812	0.14932	FALSE
RNMT_2	RNMT	444.83/501.51/365.51	435.62/145.04/163.31	444.83	163.31	-1.4401	4752.2	15136	2.2934	0.010912	0.98909	0.021824	0.14932	FALSE
EXOC3_15	EXOC3	1088.1/914.2/1084	683.26/280.5/642.35	1084	642.35	-0.75406	14428	37119	2.2925	0.010938	0.98906	0.021877	0.14958	FALSE
CPSF4_6	CPSF4	375.07/292.47/365.51	209.85/89.904/112.14	365.51	112.14	-1.6958	2712.9	12419	2.291	0.010983	0.98902	0.021966	0.14994	FALSE
KIAA1033_9	KIAA1033	424/549.06/360.36	67.63/149.84/247.14	424	149.84	-1.4944	9845	14422	2.2899	0.011013	0.98899	0.022026	0.15003	FALSE
COPS8_9	COPS8	188.44/256.59/569.22	178.03/51.545/31.573	256.59	51.545	-2.2934	51193	8696.6	2.2898	0.011015	0.98898	0.022031	0.15003	FALSE
VPS35_3	VPS35	1147/963.54/1007.5	611.65/582.58/565.05	1007.5	582.58	-0.78928	10687	34482	2.2885	0.011053	0.98895	0.022106	0.15039	FALSE
CERS2_5	CERS2	152.2/267.35/214.01	27.848/33.564/113.23	214.01	33.564	-2.6371	3332.7	7244.2	2.2868	0.011105	0.9889	0.022209	0.15079	FALSE
SPDYE1_2	SPDYE1	93.315/219.8/258.87	35.804/0/138.27	219.8	35.804	-2.5848	8762.7	7441.7	2.2867	0.011108	0.98889	0.022215	0.15079	FALSE
VPS35_6	VPS35	0/32.298/26.476	0/59.936/0	26.476	0	-4.7801	367.42	883.02	2.2835	0.0112	0.9888	0.0224	0.1513	FALSE
RBM3_2	RBM3	444.83/205.45/392.72	130.29/122.27/689.16	392.72	130.29	-1.5844	18893	13351	2.2824	0.011232	0.98877	0.022463	0.15152	FALSE
MESDC2_2	MESDC2	394.1/205.45/417.73	131.28/80.314/442.02	394.1	131.28	-1.5786	18074	13398	2.2815	0.011259	0.98874	0.022519	0.15156	FALSE
INTS12_10	INTS12	131.37/110.35/216.22	10.94/0/35.928	131.37	10.94	-3.4706	3820.6	4431.4	2.2812	0.011269	0.98873	0.022538	0.15156	FALSE
CAPZB_9	CAPZB	344.27/378.6/329.47	267.54/91.102/100.16	344.27	100.16	-1.771	698.71	11693	2.2811	0.011271	0.98873	0.022542	0.15156	FALSE
DARS_15	DARS	26.273/3.5886/113.26	0/0/0	26.273	0	-4.7694	4040.3	876.23	2.2805	0.01129	0.98871	0.02258	0.15156	FALSE
MBTPS2_5	MBTPS2	826.25/416.28/260.34	282.45/3.5961/145.89	416.28	145.89	-1.5063	96196	14158	2.2802	0.011298	0.9887	0.022596	0.15156	FALSE
UBE2Q1_12	UBE2Q1	608.82/877.42/850.16	461.48/290.09/583.56	850.16	461.48	-0.88005	29495	29061	2.2801	0.011302	0.9887	0.022604	0.15156	FALSE
SREBF1_7	SREBF1	532.71/808.34/518.48	225.77/203.78/910.17	532.71	225.77	-1.2349	38085	18149	2.2797	0.011312	0.98869	0.022625	0.15156	FALSE
GAGE12B_9	GAGE12B	537.24/722.21/585.4	188.97/304.47/263.47	585.4	263.47	-1.1488	10518	19958	2.2794	0.011322	0.98868	0.022644	0.1516	FALSE
MGEA5_5	MGEA5	991.14/1438.1/1328.9	630.55/1334.2/842.67	1328.9	842.67	-0.65659	63014	45570	2.2778	0.011368	0.98863	0.022737	0.15206	FALSE
MFAP1_8	MFAP1	0/26.017/27.946	0/0/0	26.017	0	-4.7558	340.32	867.64	2.2766	0.011405	0.98859	0.02281	0.15227	FALSE
HSD17B10_4	HSD17B10	27.179/26.017/19.121	0/0/20.686	26.017	0	-4.7558	24.454	867.64	2.2766	0.011405	0.98859	0.02281	0.15227	FALSE
ARPC3_12	ARPC3	932.25/1046.1/734.7	475.4/612.54/525.85	932.25	525.85	-0.82486	25993	31887	2.2758	0.011428	0.98857	0.022857	0.15244	FALSE
UXT_12	UXT	547.21/486.26/227.25	209.85/194.19/56.614	486.26	194.19	-1.3198	35400	16556	2.2725	0.011529	0.98847	0.023058	0.15353	FALSE
MRPS21_9	MRPS21	737.46/353.48/169.15	253.61/106.69/59.88	353.48	106.69	-1.7189	90711	12008	2.2723	0.011535	0.98847	0.02307	0.15353	FALSE
MPDU1_9	MPDU1	472.92/597.51/501.56	204.88/192.99/418.07	501.56	204.88	-1.2875	5012.6	17081	2.2721	0.01154	0.98846	0.02308	0.15353	FALSE
GNB1L_11	GNB1L	1233/1353.8/1434.1	864.27/727.62/951.55	1353.8	864.27	-0.64686	10516	46429	2.2719	0.011547	0.98845	0.023093	0.15353	FALSE
GIGYF2_12	GIGYF2	192.07/519.45/526.57	177.03/272.11/217.75	519.45	217.75	-1.2505	53616	17694	2.2697	0.011614	0.98839	0.023228	0.15416	FALSE
DHRSX_10	DHRSX	533.62/609.17/353.74	260.57/227.76/128.47	533.62	227.76	-1.2247	19032	18180	2.2697	0.011614	0.98839	0.023228	0.15416	FALSE
GREB1L_2	GREB1L	357.86/425.25/393.46	132.28/93.5/230.81	393.46	132.28	-1.5654	1139	13376	2.269	0.011634	0.98837	0.023268	0.15434	FALSE
GAGE1_1	GAGE1	330.68/610.96/505.24	380.92/204.98/207.95	505.24	207.95	-1.2767	20824	17207	2.2683	0.011655	0.98834	0.023311	0.15446	FALSE
STX4_15	STX4	635.09/1180.7/714.1	360.03/303.27/628.19	714.1	360.03	-0.98603	111960	24380	2.2677	0.011672	0.98833	0.023345	0.1546	FALSE
RANBP1_9	RANBP1	702.13/515.86/592.02	259.58/461.51/270	592.02	270	-1.1298	8962	20185	2.2671	0.011693	0.98831	0.023387	0.15466	FALSE
UBA3_11	UBA3	0/120.22/90.458	26.853/0/5.4436	90.458	5.4436	-3.8272	4534.2	3043.4	2.2664	0.011713	0.98829	0.023426	0.1548	FALSE
CTNNBIP1_6	CTNNBIP1	617.87/814.62/648.65	547.01/311.67/176.37	648.65	311.67	-1.055	14246	22130	2.2655	0.011742	0.98826	0.023483	0.15509	FALSE
AXIN1_13	AXIN1	726.59/1090.9/689.83	369.98/486.68/290.69	726.59	369.98	-0.9718	67050	24809	2.2642	0.011782	0.98822	0.023564	0.15543	FALSE
GZF1_10	GZF1	1219.4/716.83/995.77	577.84/330.85/814.37	995.77	577.84	-0.7841	63920	34076	2.264	0.011786	0.98821	0.023572	0.15543	FALSE
FNDC3B_3	FNDC3B	263.64/230.57/175.03	41.772/0/317.91	230.57	41.772	-2.4367	2088.9	7808.9	2.2624	0.011835	0.98816	0.023671	0.156	FALSE
IBA57_2	IBA57	98.751/254.79/203.71	166.09/31.167/26.129	203.71	31.167	-2.67	6813.1	6893.3	2.2618	0.011856	0.98814	0.023712	0.15618	FALSE
HNRNPA2B1_1	HNRNPA2B1	656.83/288.88/492.74	373.95/121.07/200.33	492.74	200.33	-1.2942	34242	16778	2.2598	0.011918	0.98808	0.023836	0.15658	FALSE
EXOC1_4	EXOC1	847.09/825.38/714.1	539.05/445.92/189.44	825.38	445.92	-0.88679	6427	28208	2.2594	0.01193	0.98807	0.023861	0.15659	FALSE
INTS12_5	INTS12	416.75/209.93/433.17	36.799/148.64/351.66	416.75	148.64	-1.4811	21521	14174	2.2593	0.011932	0.98807	0.023864	0.15659	FALSE
PRMT1_15	PRMT1	289.01/115.73/280.2	52.712/65.929/201.41	280.2	65.929	-2.0709	13563	9502.9	2.258	0.011973	0.98803	0.023947	0.15696	FALSE
TM9SF2_7	TM9SF2	444.83/464.73/351.54	265.55/167.82/96.897	444.83	167.82	-1.401	4550.1	15136	2.2563	0.012025	0.98798	0.02405	0.1573	FALSE
SSX4_8	SSX4	563.52/854.09/651.59	315.28/244.54/454	651.59	315.28	-1.045	24382	22231	2.2558	0.012041	0.98796	0.024081	0.15739	FALSE
NonTargeting_Human_0588	NonTargeting_Human_0588	535.43/335.54/386.84	328.2/121.07/129.56	386.84	129.56	-1.5708	12356	13149	2.2552	0.012062	0.98794	0.024123	0.15745	FALSE
ARGLU1_12	ARGLU1	800.88/244.03/386.84	126.31/230.15/129.56	386.84	129.56	-1.5708	95914	13149	2.2552	0.012062	0.98794	0.024123	0.15745	FALSE
EWSR1_1	EWSR1	452.99/582.25/649.39	303.34/264.92/149.16	582.25	264.92	-1.1332	10608	19850	2.253	0.012131	0.98787	0.024261	0.15809	FALSE
PHF3_8	PHF3	24.461/0/73.543	0/0/34.839	24.461	0	-4.6702	1503.7	815.39	2.2524	0.01215	0.98785	0.024299	0.15817	FALSE
PAGE4_4	PAGE4	735.65/729.39/772.94	378.93/437.53/345.13	735.65	378.93	-0.95526	714.77	25121	2.2508	0.012201	0.9878	0.024401	0.15858	FALSE
TAF1_3	TAF1	432.15/172.25/336.09	98.461/106.69/69.678	336.09	98.461	-1.7609	18035	11413	2.2493	0.012245	0.98775	0.024491	0.15891	FALSE
NCOR1_9	NCOR1	822.63/820/970.77	445.56/806.73/342.95	822.63	445.56	-0.88313	10977	28113	2.2489	0.01226	0.98774	0.024521	0.15902	FALSE
PRMT1_10	PRMT1	480.17/327.46/455.23	295.38/176.21/154.6	455.23	176.21	-1.3643	8473.5	15492	2.2456	0.012364	0.98764	0.024728	0.16011	FALSE
KAT7_2	KAT7	686.73/705.16/414.78	343.12/185.8/524.77	686.73	343.12	-0.99892	37147	23439	2.2445	0.012401	0.9876	0.024801	0.1603	FALSE
MED26_3	MED26	527.28/903.43/139.73	226.76/151.04/459.44	527.28	226.76	-1.2138	145840	17963	2.2435	0.012431	0.98757	0.024863	0.16056	FALSE
TMEM165_6	TMEM165	530.9/714.14/539.81	355.06/236.15/190.53	539.81	236.15	-1.1893	15235	18393	2.2401	0.012542	0.98746	0.025084	0.16142	FALSE
PPIL2_4	PPIL2	329.77/509.58/467	184.99/188.2/154.6	467	184.99	-1.3313	10322	15896	2.24	0.012545	0.98746	0.02509	0.16142	FALSE
PTPMT1_5	PTPMT1	476.54/437.81/382.42	262.56/165.42/41.372	437.81	165.42	-1.3988	2283.9	14895	2.2369	0.012647	0.98735	0.025295	0.1624	FALSE
UBE2G2_5	UBE2G2	380.51/233.26/144.14	44.755/35.961/127.38	233.26	44.755	-2.3561	14812	7900.7	2.2357	0.012684	0.98732	0.025369	0.16272	FALSE
PIK3R4_15	PIK3R4	609.72/305.03/295.64	81.554/103.09/44.638	305.03	81.554	-1.8903	46462	10351	2.2357	0.012686	0.98731	0.025371	0.16272	FALSE
hsa-mir-6859-1_13	hsa-mir-6859-1	86.974/311.31/155.18	109.4/0/17.42	155.18	17.42	-3.0839	14515	5240.7	2.2354	0.012695	0.98731	0.02539	0.16275	FALSE
ABHD14B_6	ABHD14B	400.44/379.5/358.16	467.44/127.06/83.832	379.5	127.06	-1.571	447.06	12898	2.2351	0.012707	0.98729	0.025413	0.16276	FALSE
PIAS1_10	PIAS1	379.6/453.06/508.18	176.04/189.4/136.09	453.06	176.04	-1.3588	4217.3	15418	2.235	0.012709	0.98729	0.025418	0.16276	FALSE
UXT_13	UXT	555.36/296.96/678.07	243.67/248.13/434.4	555.36	248.13	-1.1591	40915	18926	2.234	0.012741	0.98726	0.025482	0.16292	FALSE
KMT2D_9	KMT2D	809.04/614.55/609.67	244.66/291.29/340.77	614.55	291.29	-1.0745	18924	20959	2.2333	0.012766	0.98723	0.025532	0.16314	FALSE
GDI2_7	GDI2	694.88/697.09/297.11	389.87/351.22/168.75	694.88	351.22	-0.98235	79112	23719	2.2315	0.012823	0.98718	0.025647	0.16351	FALSE
NFRKB_5	NFRKB	842.56/439.61/987.68	541.04/463.9/446.38	842.56	463.9	-0.85956	91716	28799	2.2313	0.012831	0.98717	0.025661	0.16351	FALSE
ANKHD1-EIF4EBP3_5	ANKHD1-EIF4EBP3	847.09/510.48/931.79	649.45/467.5/379.97	847.09	467.5	-0.85617	60239	28955	2.2308	0.012848	0.98715	0.025697	0.16351	FALSE
RANBP1_12	RANBP1	1051.8/1150.2/672.18	628.56/582.58/856.83	1051.8	628.56	-0.74186	76901	36009	2.2306	0.012854	0.98715	0.025708	0.16351	FALSE
SMNDC1_4	SMNDC1	164.89/227.88/205.19	385.89/33.564/11.976	205.19	33.564	-2.5766	1069.4	6943.4	2.229	0.012907	0.98709	0.025813	0.16366	FALSE
GAGE1_4	GAGE1	455.71/445.89/318.44	187.97/100.69/172.02	445.89	172.02	-1.369	8169.2	15172	2.2278	0.012949	0.98705	0.025897	0.16377	FALSE
FNDC3B_5	FNDC3B	416.75/279.02/377.28	201.9/127.06/116.49	377.28	127.06	-1.5626	5606.7	12822	2.2221	0.013138	0.98686	0.026276	0.16565	FALSE
CHD7_7	CHD7	382.32/617.24/415.52	37.793/152.24/234.08	415.52	152.24	-1.4426	20897	14132	2.2216	0.013155	0.98685	0.02631	0.16568	FALSE
ANKHD1-EIF4EBP3_15	ANKHD1-EIF4EBP3	165.79/32.298/198.57	20.886/0/35.928	165.79	20.886	-2.93	9447.6	5601.9	2.2194	0.01323	0.98677	0.026461	0.16632	FALSE
EXOC7_1	EXOC7	765.55/698.88/558.19	357.05/124.67/374.52	698.88	357.05	-0.96697	12119	23856	2.2133	0.01344	0.98656	0.02688	0.16807	FALSE
EXT1_1	EXT1	378.7/291.58/327.27	222.78/80.314/96.897	327.27	96.897	-1.7455	1959.5	11111	2.2119	0.013488	0.98651	0.026976	0.16852	FALSE
SREBF2_1	SREBF2	497.38/213.52/556.72	286.43/209.78/113.23	497.38	209.78	-1.2415	42048	16937	2.2118	0.01349	0.98651	0.02698	0.16852	FALSE
UVRAG_4	UVRAG	492.85/774.24/289.02	206.87/389.58/100.16	492.85	206.87	-1.2484	60364	16782	2.2096	0.013566	0.98643	0.027133	0.1693	FALSE
DYRK1A_7	DYRK1A	377.79/556.24/389.78	81.554/136.65/456.18	389.78	136.65	-1.5053	13926	13250	2.2089	0.013589	0.98641	0.027179	0.16947	FALSE
CPSF3L_7	CPSF3L	115.06/73.567/208.86	120.34/0/9.7985	115.06	9.7985	-3.4259	5260.4	3877.6	2.2087	0.013597	0.9864	0.027194	0.16947	FALSE
EXOC7_13	EXOC7	254.58/382.19/584.67	0/426.74/131.74	382.19	131.74	-1.5295	28641	12990	2.2086	0.013601	0.9864	0.027202	0.16947	FALSE
TM9SF2_6	TM9SF2	76.102/124.7/92.664	28.842/3.5961/6.5324	92.664	6.5324	-3.6363	650.44	3118.1	2.2078	0.013629	0.98637	0.027257	0.16969	FALSE
SUMO2_14	SUMO2	504.63/213.52/444.94	127.3/173.81/323.35	444.94	173.81	-1.351	28558	15139	2.2077	0.013633	0.98637	0.027265	0.16969	FALSE
SCAP_3	SCAP	939.5/1404/819.27	544.02/590.97/278.71	939.5	544.02	-0.7871	115130	32137	2.206	0.013691	0.98631	0.027381	0.17016	FALSE
ZBTB8OS_3	ZBTB8OS	377.79/391.16/326.53	146.2/129.46/31.573	377.79	129.46	-1.5378	1403.1	12840	2.2034	0.013784	0.98622	0.027568	0.17106	FALSE
PTAR1_9	PTAR1	634.18/436.91/416.25	38.788/169.02/173.11	436.91	169.02	-1.365	19671	14865	2.202	0.013832	0.98617	0.027664	0.17148	FALSE
TAF2_2	TAF2	393.19/144.44/214.01	38.788/98.295/0	214.01	38.788	-2.434	18473	7244.2	2.2006	0.013883	0.98612	0.027765	0.17161	FALSE
INTS1_14	INTS1	348.8/411.79/1079.6	417.72/152.24/148.07	411.79	152.24	-1.4297	224980	14004	2.2003	0.013894	0.98611	0.027788	0.17161	FALSE
FNTB_4	FNTB	628.75/579.56/399.34	260.57/270.91/489.93	579.56	270.91	-1.0943	17450	19757	2.1964	0.014032	0.98597	0.028064	0.17264	FALSE
RAB5C_4	RAB5C	1105.3/364.24/946.5	419.7/551.41/574.85	946.5	551.41	-0.77839	182120	32378	2.1957	0.014057	0.98594	0.028114	0.17278	FALSE
SCARB1_14	SCARB1	1054.6/1093.6/1276	1012.5/668.88/640.17	1093.6	668.88	-0.70847	17388	37450	2.1949	0.014087	0.98591	0.028173	0.17301	FALSE
MEF2B_14	MEF2B	380.51/186.61/508.18	132.28/47.949/224.28	380.51	132.28	-1.5173	26949	12933	2.1939	0.014121	0.98588	0.028243	0.1733	FALSE
ATP13A1_3	ATP13A1	732.03/494.33/680.27	346.11/0/483.39	680.27	346.11	-0.97286	18626	23217	2.1932	0.014145	0.98585	0.02829	0.17342	FALSE
SCARB1_10	SCARB1	733.84/345.4/669.98	235.71/365.61/338.59	669.98	338.59	-0.98246	54713	22863	2.1918	0.014199	0.9858	0.028397	0.17381	FALSE
WNT3A_10	WNT3A	711.19/753.61/589.82	369.98/1002.1/247.14	711.19	369.98	-0.94094	8265.6	24280	2.1899	0.014266	0.98573	0.028533	0.17447	FALSE
ACTR3_14	ACTR3	19.931/236.85/199.3	121.34/33.564/22.863	199.3	33.564	-2.5348	16792	6742.9	2.1896	0.014276	0.98572	0.028552	0.1745	FALSE
CHMP1A_4	CHMP1A	131.37/682.73/261.08	61.663/15.583/218.83	261.08	61.663	-2.0643	97310	8849.9	2.1891	0.014294	0.98571	0.028588	0.17463	FALSE
GAGE1_12	GAGE1	277.23/38.578/171.36	23.869/71.923/0	171.36	23.869	-2.7929	14420	5791.2	2.1886	0.014312	0.98569	0.028625	0.17468	FALSE
CCDC115_9	CCDC115	1013.8/905.23/831.77	814.54/520.24/204.68	905.23	520.24	-0.79792	8590.2	30957	2.1881	0.014331	0.98567	0.028662	0.17473	FALSE
COMMD10_4	COMMD10	549.93/494.33/742.79	462.47/250.53/91.453	549.93	250.53	-1.1311	20143	18740	2.1879	0.01434	0.98566	0.02868	0.17476	FALSE
CCDC22_5	CCDC22	472.01/479.98/358.16	183.99/195.39/270	472.01	195.39	-1.2682	6513.5	16067	2.1849	0.014447	0.98555	0.028894	0.17562	FALSE
ZNF263_7	ZNF263	1049.1/881.01/589.08	443.57/527.43/501.9	881.01	501.9	-0.81051	56741	30123	2.1843	0.01447	0.98553	0.02894	0.17581	FALSE
PPP1R8_4	PPP1R8	212/330.15/345.65	101.45/109.08/95.808	330.15	101.45	-1.6926	7100.4	11210	2.1839	0.014485	0.98551	0.028971	0.17591	FALSE
VPS29_5	VPS29	127.74/330.15/303.73	88.516/0/86.009	303.73	86.009	-1.8083	15835	10307	2.1801	0.014627	0.98537	0.029253	0.177	FALSE
PTAR1_14	PTAR1	601.57/877.42/316.24	289.42/310.47/197.06	601.57	289.42	-1.053	78754	20513	2.1798	0.014635	0.98537	0.02927	0.177	FALSE
HYOU1_8	HYOU1	220.15/29.606/156.65	19.891/0/162.22	156.65	19.891	-2.9157	10086	5290.8	2.1797	0.014638	0.98536	0.029277	0.177	FALSE
MEF2BNB_2	MEF2BNB	376.89/622.63/573.64	412.74/246.94/268.92	573.64	268.92	-1.0901	20555	19554	2.1797	0.01464	0.98536	0.02928	0.177	FALSE
EIF5A_9	EIF5A	204.75/366.94/387.57	125.31/214.57/113.23	366.94	125.31	-1.5424	13365	12468	2.1771	0.014737	0.98526	0.029473	0.17773	FALSE
SSR2_11	SSR2	265.45/205.45/186.06	36.799/49.147/28.307	205.45	36.799	-2.4494	1988	6952.4	2.1758	0.014786	0.98521	0.029573	0.17824	FALSE
KDM6A_2	KDM6A	958.52/899.85/1330.4	316.27/564.59/752.31	958.52	564.59	-0.76255	70866	32793	2.1753	0.014802	0.9852	0.029604	0.17829	FALSE
STX4_4	STX4	624.22/488.05/305.94	267.54/172.61/207.95	488.05	207.95	-1.2269	25853	16617	2.1749	0.014818	0.98518	0.029636	0.17836	FALSE
MESDC2_5	MESDC2	175.76/172.25/99.283	24.864/0/165.49	172.25	24.864	-2.7439	2668.5	5821.8	2.173	0.014891	0.98511	0.029781	0.17905	FALSE
PIAS1_14	PIAS1	189.35/697.09/458.17	165.1/210.97/187.26	458.17	187.26	-1.2863	64674	15593	2.1727	0.014902	0.9851	0.029803	0.1791	FALSE
DPY30_15	DPY30	375.07/338.23/395.66	131.28/101.89/284.16	375.07	131.28	-1.5074	890.77	12747	2.1708	0.014972	0.98503	0.029945	0.17955	FALSE
EXOC7_10	EXOC7	784.57/496.13/411.84	339.14/184.6/214.48	496.13	214.48	-1.2061	45153	16894	2.1686	0.015055	0.98494	0.03011	0.18031	FALSE
MRP63_12	MRP63	1002.9/604.68/862.66	1120.9/490.27/447.47	862.66	490.27	-0.81394	43112	29491	2.1685	0.015062	0.98494	0.030124	0.18031	FALSE
NMT1_10	NMT1	769.17/362.45/808.97	458.49/418.35/264.56	769.17	418.35	-0.87702	83504	26274	2.1644	0.015218	0.98478	0.030436	0.18184	FALSE
STARD4_4	STARD4	357.86/261.07/440.52	170.07/0/120.85	357.86	120.85	-1.5583	8100.6	12158	2.1643	0.015219	0.98478	0.030438	0.18184	FALSE
CHD7_2	CHD7	998.38/668.38/401.55	473.41/341.63/277.62	668.38	341.63	-0.96616	90052	22808	2.1637	0.015245	0.98476	0.030489	0.18192	FALSE
NonTargeting_Human_0027	NonTargeting_Human_0027	664.99/639.67/313.29	635.52/262.52/320.09	639.67	320.09	-0.99663	53582	21821	2.1636	0.015246	0.98475	0.030492	0.18192	FALSE
WDR7_12	WDR7	630.56/648.64/444.94	313.29/492.67/231.9	630.56	313.29	-1.0068	17391	21508	2.1636	0.015249	0.98475	0.030497	0.18192	FALSE
TBX6_7	TBX6	290.82/279.91/81.633	186.98/50.346/74.033	279.91	74.033	-1.9045	19717	9493	2.1623	0.015296	0.9847	0.030592	0.18222	FALSE
NRBP1_1	NRBP1	195.69/218.01/72.072	28.842/89.904/33.75	195.69	33.75	-2.5008	7889.8	6619.9	2.1618	0.015318	0.98468	0.030635	0.18239	FALSE
KIF3C_11	KIF3C	465.67/771.55/334.62	193.94/316.46/186.17	465.67	193.94	-1.2594	55369	15850	2.1611	0.015343	0.98466	0.030686	0.18252	FALSE
SSR2_8	SSR2	1101.7/521.25/706.75	406.77/328.45/371.26	706.75	371.26	-0.92695	95185	24127	2.16	0.015387	0.98461	0.030775	0.18269	FALSE
DCPS_13	DCPS	247.33/362.45/410.37	124.32/94.698/164.4	362.45	124.32	-1.5361	7774.4	12315	2.1595	0.015405	0.98459	0.030811	0.18276	FALSE
EXOC8_5	EXOC8	296.25/523.04/650.86	28.842/234.95/494.28	523.04	234.95	-1.1512	33885	17817	2.1594	0.015409	0.98459	0.030817	0.18276	FALSE
CTDP1_2	CTDP1	404.97/601.99/491.27	122.33/489.08/212.3	491.27	212.3	-1.2066	9853.4	16728	2.1588	0.015434	0.98457	0.030868	0.18297	FALSE
ARFRP1_4	ARFRP1	520.03/366.94/97.812	446.56/107.88/127.38	366.94	127.38	-1.519	47933	12468	2.1581	0.015462	0.98454	0.030923	0.18312	FALSE
ARPC4_13	ARPC4	332.49/515.86/505.98	213.83/222.96/285.25	505.98	222.96	-1.1787	15097	17232	2.1574	0.015486	0.98451	0.030972	0.18332	FALSE
RPL17_5	RPL17	19.025/0/38.242	33.815/0/0	19.025	0	-4.3238	365.63	633.06	2.1568	0.01551	0.98449	0.031021	0.18352	FALSE
hsa-mir-550a-1_1	hsa-mir-550a-1	216.53/64.595/264.02	42.766/0/121.94	216.53	42.766	-2.3133	12670	7330.1	2.1552	0.015572	0.98443	0.031143	0.18416	FALSE
DNAJC13_4	DNAJC13	510.97/895.36/740.58	625.58/397.97/285.25	740.58	397.97	-0.89431	38339	25290	2.1544	0.015604	0.9844	0.031208	0.18434	FALSE
GLOD5_14	GLOD5	316.19/145.34/328.74	220.79/95.897/56.614	316.19	95.897	-1.7108	14673	10732	2.1541	0.015617	0.98438	0.031234	0.18434	FALSE
VPS29_12	VPS29	345.18/379.5/208.86	0/113.88/161.13	345.18	113.88	-1.5914	9879.7	11724	2.1538	0.015627	0.98437	0.031254	0.18437	FALSE
MTA2_1	MTA2	560.8/739.26/629.53	309.31/314.06/532.39	629.53	314.06	-1.0009	8381.9	21473	2.153	0.015658	0.98434	0.031317	0.18456	FALSE
KIAA1328_6	KIAA1328	357.86/511.38/144.88	104.43/122.27/426.78	357.86	122.27	-1.5416	34464	12158	2.151	0.015736	0.98426	0.031473	0.18512	FALSE
GDI2_4	GDI2	568.05/616.35/497.89	404.79/146.24/268.92	568.05	268.92	-1.076	3627.6	19362	2.1503	0.015765	0.98423	0.031531	0.18537	FALSE
RAB10_15	RAB10	614.25/1179.8/854.57	487.33/251.73/496.46	854.57	487.33	-0.80902	81750	29212	2.1486	0.015831	0.98417	0.031663	0.18606	FALSE
ACTR3_1	ACTR3	327.96/399.23/632.47	129.29/149.84/210.12	399.23	149.84	-1.4078	29740	13574	2.1481	0.015853	0.98415	0.031705	0.18609	FALSE
VPS29_2	VPS29	347.89/397.44/572.17	115.37/148.64/348.39	397.44	148.64	-1.4129	16492	13512	2.1481	0.015855	0.98415	0.031709	0.18609	FALSE
DCAKD_4	DCAKD	609.72/726.7/615.56	295.38/304.47/531.3	615.56	304.47	-1.0132	6193	20993	2.1473	0.015885	0.98411	0.03177	0.18629	FALSE
KTI12_8	KTI12	400.44/497.02/433.17	173.05/420.75/139.36	433.17	173.05	-1.3187	2574.3	14736	2.1472	0.015889	0.98411	0.031779	0.18629	FALSE
ACTR3_9	ACTR3	538.15/822.69/464.79	247.65/220.56/255.85	538.15	247.65	-1.1166	43173	18336	2.1462	0.015927	0.98407	0.031854	0.18655	FALSE
GNB2L1_10	GNB2L1	578.92/450.37/486.86	210.85/509.45/194.88	486.86	210.85	-1.2034	4903.3	16576	2.1457	0.015949	0.98405	0.031897	0.18657	FALSE
EXOC7_8	EXOC7	320.72/395.65/303	87.521/99.493/287.42	320.72	99.493	-1.6787	2964.2	10887	2.1455	0.015956	0.98404	0.031913	0.18657	FALSE
CPSF4_1	CPSF4	511.88/638.77/583.93	281.46/616.14/130.65	583.93	281.46	-1.0502	4099.9	19907	2.1442	0.016008	0.98399	0.032016	0.18693	FALSE
CPSF3L_15	CPSF3L	1012/776.94/1125.2	527.12/849.89/612.95	1012	612.95	-0.7224	34033	34635	2.1441	0.016013	0.98399	0.032026	0.18693	FALSE
RNPEP_1	RNPEP	99.657/287.99/164.74	23.869/56.34/0	164.74	23.869	-2.7364	9713	5566	2.1418	0.016103	0.9839	0.032206	0.18762	FALSE
CIAO1_4	CIAO1	177.57/161.49/88.987	22.875/8.391/72.945	161.49	22.875	-2.7668	2757.5	5455.5	2.1414	0.016119	0.98388	0.032239	0.18773	FALSE
RAB10_14	RAB10	1213.1/879.21/708.22	280.47/508.25/604.24	879.21	508.25	-0.78946	70360	30061	2.1396	0.016195	0.9838	0.03239	0.18852	FALSE
FNTB_14	FNTB	1002.9/464.73/1133.3	606.68/943.39/381.05	1002.9	606.68	-0.72425	153320	34322	2.1388	0.016227	0.98377	0.032455	0.1888	FALSE
hsa-mir-6770-1_4	hsa-mir-6770-1	830.78/642.36/732.49	326.22/394.38/604.24	732.49	394.38	-0.89155	8891.8	25012	2.1379	0.01626	0.98374	0.032521	0.1891	FALSE
SULT1A2_12	SULT1A2	910.5/995.84/617.03	345.11/533.43/739.24	910.5	533.43	-0.77026	46706	31138	2.1369	0.016303	0.9837	0.032607	0.18929	FALSE
TMEM258_5	TMEM258	581.64/405.51/305.2	439.6/119.87/155.69	405.51	155.69	-1.3754	20541	13789	2.1341	0.016416	0.98358	0.032833	0.1901	FALSE
CSNK2A2_4	CSNK2A2	390.48/373.22/207.39	134.27/222.96/107.78	373.22	134.27	-1.4681	13898	12683	2.1326	0.016477	0.98352	0.032954	0.19053	FALSE
DARS_14	DARS	269.07/241.33/284.61	218.8/37.16/70.767	269.07	70.767	-1.912	505.46	9122.9	2.1308	0.016554	0.98345	0.033109	0.19093	FALSE
PRMT1_5	PRMT1	238.27/310.42/186.06	54.701/177.41/45.726	238.27	54.701	-2.1029	3965.2	8071.6	2.1301	0.01658	0.98342	0.033161	0.19099	FALSE
WDR37_14	WDR37	480.17/513.17/654.53	231.73/409.96/204.68	513.17	231.73	-1.1436	10536	17479	2.13	0.016585	0.98341	0.033171	0.19099	FALSE
SBK1_12	SBK1	601.57/1134.9/831.04	629.56/324.85/472.51	831.04	472.51	-0.81326	72495	28402	2.1274	0.016693	0.98331	0.033386	0.19185	FALSE
MRPL28_11	MRPL28	707.57/793.08/505.24	376.94/225.36/435.49	707.57	376.94	-0.90675	24124	24155	2.1274	0.016693	0.98331	0.033386	0.19185	FALSE
C1GALT1_8	C1GALT1	173.95/372.32/356.68	276.49/103.09/124.11	356.68	124.11	-1.5154	16819	12118	2.1267	0.016724	0.98328	0.033449	0.19186	FALSE
TP53TG3_3	TP53TG3	1098/1141.2/419.2	460.48/685.66/721.82	1098	685.66	-0.67857	231350	37602	2.1266	0.016726	0.98327	0.033452	0.19186	FALSE
ARPC3_1	ARPC3	222.87/446.78/423.61	232.73/169.02/102.34	423.61	169.02	-1.3204	20417	14409	2.1258	0.016758	0.98324	0.033516	0.19208	FALSE
SPATA5_7	SPATA5	335.21/348.1/405.96	139.24/94.698/118.67	348.1	118.67	-1.5446	1757	11824	2.1258	0.01676	0.98324	0.033521	0.19208	FALSE
LDLR_11	LDLR	447.55/493.44/408.16	185.98/176.21/500.81	447.55	185.98	-1.2624	1828.3	15229	2.1229	0.016879	0.98312	0.033759	0.19291	FALSE
COMMD2_3	COMMD2	656.83/730.28/558.19	339.14/239.74/375.61	656.83	339.14	-0.95157	7562.5	22411	2.1222	0.016909	0.98309	0.033817	0.19314	FALSE
SREBF1_3	SREBF1	523.65/186.61/533.19	240.68/471.09/177.46	523.65	240.68	-1.1182	56845	17838	2.1197	0.017016	0.98298	0.034032	0.194	FALSE
ATP11A_14	ATP11A	420.37/480.87/469.21	201.9/318.86/176.37	469.21	201.9	-1.2126	1260.4	15971	2.1175	0.017107	0.98289	0.034214	0.19486	FALSE
RBM14_11	RBM14	201.13/322.98/244.16	222.78/58.737/50.081	244.16	58.737	-2.037	4031.8	8272.6	2.116	0.017171	0.98283	0.034342	0.19541	FALSE
SEZ6L2_4	SEZ6L2	2420.8/2642.1/2483.6	1864.8/2146.9/1439.3	2483.6	1864.8	-0.41319	14543	85542	2.1156	0.017191	0.98281	0.034381	0.19552	FALSE
S100A10_9	S100A10	1031/870.24/995.04	604.69/852.29/475.77	995.04	604.69	-0.71762	8433.9	34051	2.1154	0.017199	0.9828	0.034398	0.19552	FALSE
CTR9_13	CTR9	323.43/357.07/139.73	121.34/104.29/100.16	323.43	104.29	-1.6236	17439	10980	2.1141	0.017254	0.98275	0.034508	0.19598	FALSE
POLR2C_6	POLR2C	66.136/229.67/261.08	51.717/170.22/17.42	229.67	51.717	-2.1295	13865	7778.3	2.1134	0.017283	0.98272	0.034566	0.19613	FALSE
FNDC3B_10	FNDC3B	576.2/947.4/632.47	521.15/19.179/322.26	632.47	322.26	-0.97057	51172	21574	2.1122	0.017337	0.98266	0.034673	0.19656	FALSE
TMEM165_13	TMEM165	599.76/444.09/359.63	377.93/75.519/185.08	444.09	185.08	-1.2582	15683	15110	2.1105	0.017408	0.98259	0.034815	0.19697	FALSE
CDC73_11	CDC73	422.18/59.212/253.72	55.695/73.122/64.235	253.72	64.235	-1.9652	33107	8598.9	2.1095	0.01745	0.98255	0.034901	0.19711	FALSE
COMMD3_9	COMMD3	137.71/247.61/80.162	122.33/1.1987/17.42	137.71	17.42	-2.9127	7695.5	4646.9	2.1081	0.017511	0.98249	0.035022	0.19753	FALSE
URI1_14	URI1	225.59/433.33/413.31	125.31/213.37/164.4	413.31	164.4	-1.3248	17821	14056	2.105	0.017645	0.98236	0.03529	0.19858	FALSE
NonTargeting_Human_0249	NonTargeting_Human_0249	837.12/328.36/867.81	725.03/472.29/481.22	837.12	481.22	-0.79748	129890	28612	2.1041	0.017686	0.98231	0.035371	0.19894	FALSE
NCBP2_8	NCBP2	408.59/383.98/203.71	469.43/53.942/144.8	383.98	144.8	-1.4008	16551	13052	2.1022	0.017766	0.98223	0.035533	0.19958	FALSE
NDUFB10_8	NDUFB10	418.56/314.9/128.7	43.761/100.69/163.31	314.9	100.69	-1.6353	22708	10689	2.097	0.017996	0.982	0.035992	0.20162	FALSE
GAGE12B_11	GAGE12B	333.4/239.54/279.46	79.565/375.2/58.791	279.46	79.565	-1.7996	2251.4	9477.7	2.0967	0.018009	0.98199	0.036018	0.20162	FALSE
CDC73_14	CDC73	310.75/101.38/291.23	86.527/208.58/72.945	291.23	86.527	-1.7393	18212	9879.7	2.0956	0.01806	0.98194	0.036121	0.20162	FALSE
HNRNPU_11	HNRNPU	582.54/688.12/1228.2	366.99/362.01/461.62	688.12	366.99	-0.90507	151400	23486	2.0955	0.018064	0.98194	0.036129	0.20162	FALSE
BRD2_5	BRD2	312.56/404.62/194.15	99.456/64.731/221.01	312.56	99.456	-1.6422	11247	10609	2.0949	0.01809	0.98191	0.036179	0.20167	FALSE
ZW10_10	ZW10	263.64/500.61/494.95	366.99/103.09/223.19	494.95	223.19	-1.1455	26767	16854	2.0948	0.018093	0.98191	0.036187	0.20167	FALSE
COMMD3_11	COMMD3	405.88/772.45/488.33	218.8/238.54/71.856	488.33	218.8	-1.1546	43762	16627	2.0919	0.018224	0.98178	0.036448	0.20276	FALSE
HNF4A_11	HNF4A	647.77/366.94/400.07	264.55/157.03/79.477	400.07	157.03	-1.3437	31226	13603	2.0904	0.01829	0.98171	0.03658	0.2033	FALSE
KIAA1033_12	KIAA1033	661.36/380.39/497.15	421.69/179.81/225.37	497.15	225.37	-1.1379	20299	16929	2.0903	0.018296	0.9817	0.036591	0.2033	FALSE
MKL1_1	MKL1	394.1/116.63/302.26	92.494/207.38/93.63	302.26	93.63	-1.6802	21447	10257	2.0901	0.018303	0.9817	0.036606	0.2033	FALSE
ACO2_5	ACO2	653.21/1335.9/1319.4	848.36/1274.2/875.33	1319.4	875.33	-0.59138	222020	45240	2.0876	0.018416	0.98158	0.036832	0.20424	FALSE
TADA2A_7	TADA2A	502.82/867.55/1045.8	912.01/276.9/508.43	867.55	508.43	-0.76971	82399	29659	2.0852	0.018524	0.98148	0.037049	0.20526	FALSE
IRS2_7	IRS2	643.24/647.75/228.72	461.48/334.44/303.75	643.24	334.44	-0.94154	85925	21944	2.0847	0.018547	0.98145	0.037093	0.20541	FALSE
ZW10_1	ZW10	189.35/313.11/297.11	83.543/91.102/227.54	297.11	91.102	-1.6946	5934.6	10081	2.084	0.018578	0.98142	0.037157	0.20549	FALSE
HTRA2_13	HTRA2	427.62/331.95/89.723	117.36/112.68/43.549	331.95	112.68	-1.5503	33913	11271	2.084	0.018579	0.98142	0.037158	0.20549	FALSE
DENND4A_10	DENND4A	474.73/459.34/301.53	314.28/81.513/199.24	459.34	199.24	-1.201	12571	15633	2.0829	0.018631	0.98137	0.037262	0.20588	FALSE
KIAA1033_1	KIAA1033	417.65/226.98/568.49	237.7/170.22/126.29	417.65	170.22	-1.2899	29554	14205	2.081	0.018718	0.98128	0.037435	0.20651	FALSE
CHMP1A_5	CHMP1A	690.35/933.04/504.51	370.97/435.13/132.82	690.35	370.97	-0.89423	46718	23563	2.0807	0.018731	0.98127	0.037461	0.20651	FALSE
DPAGT1_13	DPAGT1	194.78/224.29/138.26	220.79/33.564/38.105	194.78	38.105	-2.3238	2032.7	6589	2.0805	0.018739	0.98126	0.037479	0.20651	FALSE
USO1_10	USO1	647.77/367.83/793.53	242.67/376.4/338.59	647.77	338.59	-0.9339	49806	22100	2.0799	0.018767	0.98123	0.037534	0.2067	FALSE
C9orf41_8	C9orf41	447.55/360.66/200.77	441.58/131.86/109.96	360.66	131.86	-1.4447	16557	12253	2.0787	0.018821	0.98118	0.037642	0.20713	FALSE
SORT1_6	SORT1	792.73/420.77/1326	699.18/450.72/421.34	792.73	450.72	-0.81323	211360	27084	2.0782	0.018845	0.98115	0.037691	0.20731	FALSE
GNB2L1_9	GNB2L1	544.49/412.69/494.95	205.87/324.85/225.37	494.95	225.37	-1.1315	4610.3	16854	2.078	0.018855	0.98115	0.03771	0.20732	FALSE
HMOX2_11	HMOX2	971.21/573.28/1033.3	592.76/598.16/494.28	971.21	592.76	-0.71139	81098	33230	2.0761	0.018943	0.98106	0.037887	0.20801	FALSE
ATP13A1_9	ATP13A1	114.15/494.33/462.59	151.17/202.58/384.32	462.59	202.58	-1.1872	61207	15744	2.0745	0.019015	0.98099	0.03803	0.20861	FALSE
ALG2_5	ALG2	256.39/375.91/211.8	240.68/56.34/68.59	256.39	68.59	-1.887	8136.1	8689.9	2.0737	0.019053	0.98095	0.038107	0.20894	FALSE
PLA2G10_8	PLA2G10	154.92/333.74/258.14	69.619/9.5897/190.53	258.14	69.619	-1.8756	8184.7	8749.5	2.0728	0.019094	0.98091	0.038188	0.20924	FALSE
HYOU1_6	HYOU1	688.54/554.44/335.36	443.57/269.71/132.82	554.44	269.71	-1.0369	32990	18895	2.072	0.019134	0.98087	0.038268	0.20944	FALSE
FDX1L_9	FDX1L	225.59/235.05/98.548	32.82/52.743/170.93	225.59	52.743	-2.0759	8114.4	7639	2.0715	0.019157	0.98084	0.038313	0.20951	FALSE
EXOC4_6	EXOC4	224.68/243.13/307.41	61.663/0/128.47	243.13	61.663	-1.962	2236.2	8237.3	2.0714	0.019159	0.98084	0.038317	0.20951	FALSE
ZNF143_10	ZNF143	171.23/155.21/191.21	192.94/0/29.396	171.23	29.396	-2.5024	328	5786.9	2.0713	0.019165	0.98083	0.038331	0.20951	FALSE
KDM6A_8	KDM6A	670.42/552.65/709.69	294.39/357.22/431.14	670.42	357.22	-0.90639	7706.4	22878	2.0708	0.019189	0.98081	0.038377	0.20967	FALSE
FNDC3B_2	FNDC3B	494.66/288.88/150.03	87.521/122.27/77.299	288.88	87.521	-1.7114	30813	9799.5	2.0696	0.019244	0.98076	0.038487	0.21012	FALSE
SLC35B2_1	SLC35B2	187.54/413.59/441.26	204.88/86.307/168.75	413.59	168.75	-1.2882	25932	14065	2.0695	0.01925	0.98075	0.038499	0.21012	FALSE
KMT2D_8	KMT2D	392.29/224.29/200.04	83.543/0/52.259	224.29	52.259	-2.0807	14406	7594.7	2.0694	0.019256	0.98074	0.038512	0.21012	FALSE
TRA2B_3	TRA2B	412.22/680.04/638.35	333.18/407.56/15.242	638.35	333.18	-0.936	26438	21776	2.0682	0.01931	0.98069	0.038621	0.2105	FALSE
RPS14_2	RPS14	60.7/143.54/108.84	11.935/0/135	108.84	11.935	-3.0861	1761	3666.7	2.0679	0.019325	0.98068	0.03865	0.2105	FALSE
DNAJC17_10	DNAJC17	255.48/45.755/264.02	68.625/51.545/108.87	255.48	68.625	-1.8812	22030	8659	2.0673	0.019355	0.98065	0.03871	0.21073	FALSE
DENND4A_12	DENND4A	455.71/648.64/283.14	198.91/101.89/375.61	455.71	198.91	-1.1919	33502	15508	2.0647	0.019477	0.98052	0.038955	0.21158	FALSE
FAM21A_10	FAM21A	390.48/419.87/326.53	70.614/153.44/193.79	390.48	153.44	-1.3419	2476.4	13274	2.0646	0.01948	0.98052	0.03896	0.21158	FALSE
SSX2_10	SSX2	491.04/607.37/922.23	310.3/225.36/340.77	607.37	310.3	-0.96664	56334	20712	2.0644	0.019488	0.98051	0.038976	0.21158	FALSE
POLRMT_8	POLRMT	218.34/187.51/261.08	49.728/0/262.38	218.34	49.728	-2.1123	1388.7	7391.8	2.0644	0.019489	0.98051	0.038978	0.21158	FALSE
hsa-mir-6859-1_10	hsa-mir-6859-1	419.47/400.13/230.93	160.12/212.17/128.47	400.13	160.12	-1.3159	14502	13605	2.0639	0.019514	0.98049	0.039029	0.21158	FALSE
NCBP1_13	NCBP1	394.1/327.46/358.16	67.63/131.86/243.87	358.16	131.86	-1.4347	1117	12168	2.0634	0.019537	0.98046	0.039074	0.21158	FALSE
CARS_13	CARS	510.97/318.49/408.9	209.85/141.45/166.57	408.9	166.57	-1.2905	9296.1	13905	2.0604	0.019682	0.98032	0.039363	0.21267	FALSE
ALG2_7	ALG2	297.16/474.59/188.27	93.489/0/168.75	297.16	93.489	-1.6579	21670	10082	2.0589	0.01975	0.98025	0.0395	0.21321	FALSE
ISG15_6	ISG15	1013.8/341.82/928.85	561.93/1124.4/496.46	928.85	561.93	-0.72405	175910	31770	2.0586	0.019768	0.98023	0.039536	0.21323	FALSE
EXOC2_1	EXOC2	477.45/611.86/631	117.36/513.05/314.64	611.86	314.64	-0.95727	9216.3	20866	2.0578	0.019805	0.9802	0.039609	0.21335	FALSE
NDUFB10_12	NDUFB10	859.77/1033.5/235.34	940.85/507.06/402.83	859.77	507.06	-0.76064	210050	29391	2.0574	0.019825	0.98017	0.03965	0.21335	FALSE
TP53TG3_14	TP53TG3	818.1/850.5/893.55	494.3/795.95/499.72	850.5	499.72	-0.76599	1451.6	29072	2.0573	0.01983	0.98017	0.039659	0.21335	FALSE
BST2_7	BST2	500.1/379.5/497.15	208.86/534.63/229.72	497.15	229.72	-1.1104	6925.7	16929	2.0567	0.019856	0.98014	0.039713	0.21335	FALSE
TBC1D22A_2	TBC1D22A	1001.1/960.85/992.83	811.56/613.74/605.33	992.83	613.74	-0.69302	545.54	33975	2.0567	0.019859	0.98014	0.039718	0.21335	FALSE
RANBP1_2	RANBP1	600.66/793.98/624.38	259.58/507.06/324.44	624.38	324.44	-0.94234	14664	21296	2.0555	0.019914	0.98009	0.039827	0.21357	FALSE
SUMO2_9	SUMO2	451.18/398.34/400.07	52.712/245.74/161.13	400.07	161.13	-1.3067	1307.2	13603	2.0548	0.019949	0.98005	0.039898	0.21385	FALSE
CCDC43_11	CCDC43	200.22/558.93/799.41	310.3/239.74/275.45	558.93	275.45	-1.0182	93252	19049	2.0545	0.019965	0.98003	0.039931	0.21385	FALSE
DEXI_2	DEXI	496.47/747.33/463.32	229.74/218.17/616.22	496.47	229.74	-1.1083	32014	16906	2.0528	0.020048	0.97995	0.040096	0.21444	FALSE
DNAJC13_2	DNAJC13	461.14/444.99/365.51	192.94/213.37/185.08	444.99	192.94	-1.2014	3288.9	15141	2.0513	0.020118	0.97988	0.040236	0.21472	FALSE
C16orf62_9	C16orf62	267.26/256.59/403.02	76.581/178.61/0	267.26	76.581	-1.7899	9271.5	9061.1	2.051	0.020135	0.97987	0.040269	0.21472	FALSE
RHOT2_15	RHOT2	647.77/577.77/458.17	359.04/290.09/267.83	577.77	290.09	-0.99152	9601.7	19696	2.0502	0.02017	0.97983	0.040341	0.21491	FALSE
POLR3H_3	POLR3H	320.72/308.62/256.67	101.45/1.1987/156.78	308.62	101.45	-1.5957	1422.8	10474	2.0494	0.020211	0.97979	0.040422	0.21515	FALSE
PIM2_12	PIM2	368.73/345.4/431.7	151.17/122.27/140.45	368.73	140.45	-1.3862	2254.5	12530	2.0492	0.02022	0.97978	0.04044	0.21516	FALSE
SOCS1_2	SOCS1	648.68/629.8/1039.9	315.28/344.03/482.31	648.68	344.03	-0.913	76705	22131	2.048	0.020281	0.97972	0.040563	0.21562	FALSE
TAF7_14	TAF7	437.59/577.77/284.61	313.29/154.63/188.35	437.59	188.35	-1.2118	21526	14888	2.046	0.020378	0.97962	0.040756	0.21636	FALSE
SMOC1_1	SMOC1	443.93/222.49/336.83	114.37/119.87/202.5	336.83	119.87	-1.4828	12271	11438	2.0446	0.020449	0.97955	0.040899	0.21675	FALSE
GAGE12B_12	GAGE12B	487.41/492.54/374.33	240.68/16.782/224.28	487.41	224.28	-1.1164	6406.7	16595	2.0442	0.020469	0.97953	0.040939	0.21686	FALSE
SYP_11	SYP	803.6/620.83/238.28	299.36/323.65/536.74	620.83	323.65	-0.93762	89875	21174	2.0425	0.020553	0.97945	0.041106	0.21756	FALSE
EXOC7_15	EXOC7	393.19/269.15/496.42	106.42/192.99/157.87	393.19	157.87	-1.3111	13021	13367	2.042	0.020575	0.97943	0.04115	0.2177	FALSE
RNMT_1	RNMT	447.55/336.43/378.75	316.27/52.743/148.07	378.75	148.07	-1.3491	3262.3	12873	2.0414	0.020604	0.9794	0.041207	0.21791	FALSE
LAS1L_8	LAS1L	100.56/106.76/65.453	10.94/63.532/5.4436	100.56	10.94	-3.0885	635.56	3385.9	2.0406	0.020647	0.97935	0.041293	0.21827	FALSE
EIF2B4_13	EIF2B4	1084.5/1129.5/814.86	476.39/1065.7/691.34	1084.5	691.34	-0.64874	37356	37133	2.04	0.020674	0.97933	0.041348	0.21837	FALSE
MESDC2_12	MESDC2	910.5/691.71/876.63	934.89/327.25/523.68	876.63	523.68	-0.74219	17673	29972	2.0388	0.020737	0.97926	0.041474	0.21886	FALSE
GIGYF2_14	GIGYF2	510.06/680.04/679.54	191.95/377.6/369.08	679.54	369.08	-0.87885	14361	23191	2.0387	0.020738	0.97926	0.041477	0.21886	FALSE
ARPC3_3	ARPC3	266.36/330.15/176.5	214.82/52.743/77.299	266.36	77.299	-1.7717	6071.8	9030.1	2.0366	0.020843	0.97916	0.041687	0.21978	FALSE
WDR61_4	WDR61	796.35/506/861.93	462.47/321.26/460.53	796.35	460.53	-0.78879	44303	27209	2.0359	0.02088	0.97912	0.04176	0.22001	FALSE
GTF2H3_5	GTF2H3	424/434.22/223.57	180.02/103.09/207.95	424	180.02	-1.2313	20137	14422	2.0357	0.020893	0.97911	0.041785	0.22001	FALSE
WBSCR16_7	WBSCR16	173.95/227.88/151.5	34.81/32.365/17.42	173.95	32.365	-2.3905	1706.2	5879.5	2.0333	0.02101	0.97899	0.04202	0.22087	FALSE
PKD1_5	PKD1	681.29/478.18/703.07	311.3/477.09/371.26	681.29	371.26	-0.8741	20864	23252	2.0333	0.021011	0.97899	0.042021	0.22087	FALSE
NonTargeting_Human_0950	NonTargeting_Human_0950	629.65/315.8/661.89	277.48/418.35/332.06	629.65	332.06	-0.92106	49772	21477	2.0308	0.021138	0.97886	0.042276	0.22192	FALSE
HNRNPA2B1_11	HNRNPA2B1	220.15/465.62/455.23	202.89/191.79/207.95	455.23	202.89	-1.162	27685	15492	2.0298	0.021188	0.97881	0.042375	0.22224	FALSE
ELP3_12	ELP3	439.4/396.54/464.79	115.37/443.52/191.62	439.4	191.62	-1.1931	1240.7	14950	2.0297	0.021195	0.9788	0.04239	0.22224	FALSE
HNF4A_12	HNF4A	495.57/493.44/503.04	105.42/232.55/422.43	495.57	232.55	-1.0883	30.151	16875	2.026	0.021382	0.97862	0.042764	0.22386	FALSE
USO1_2	USO1	258.2/174.05/287.55	73.597/177.41/18.508	258.2	73.597	-1.7969	3971.8	8751.8	2.0256	0.021402	0.9786	0.042804	0.22393	FALSE
hsa-mir-6511a-4_11	hsa-mir-6511a-4	825.34/535.6/683.95	209.85/637.72/374.52	683.95	374.52	-0.86711	21000	23343	2.0253	0.021416	0.97858	0.042832	0.22398	FALSE
EWSR1_6	EWSR1	678.58/644.16/613.35	239.69/612.54/344.04	644.16	344.04	-0.9029	1066.9	21976	2.0247	0.021451	0.97855	0.042902	0.22415	FALSE
WDR18_5	WDR18	586.17/198.27/140.47	15.913/43.154/232.99	198.27	43.154	-2.1741	76902	6707.8	2.0229	0.02154	0.97846	0.04308	0.22467	FALSE
VPS13C_5	VPS13C	331.59/209.04/281.67	87.521/37.16/180.73	281.67	87.521	-1.675	3883.6	9553.1	2.0225	0.021561	0.97844	0.043122	0.22473	FALSE
CWC22_3	CWC22	301.69/185.71/86.045	37.793/240.94/0	185.71	37.793	-2.2669	11692	6280	2.0211	0.021636	0.97836	0.043271	0.22526	FALSE
PHKG2_4	PHKG2	762.83/1095.4/436.85	436.61/900.23/408.27	762.83	436.61	-0.8036	108440	26055	2.021	0.02164	0.97836	0.04328	0.22526	FALSE
CSNK1A1_4	CSNK1A1	563.52/496.13/419.2	240.68/233.75/165.49	496.13	233.75	-1.0825	5229.9	16894	2.0199	0.021697	0.9783	0.043393	0.22566	FALSE
PHF3_5	PHF3	97.845/388.47/368.45	103.43/291.29/143.71	368.45	143.71	-1.3522	36814	12520	2.0177	0.021809	0.97819	0.043619	0.22635	FALSE
TP53TG3_12	TP53TG3	758.3/985.97/756.76	433.63/345.23/554.16	758.3	433.63	-0.80489	25918	25900	2.0175	0.021824	0.97818	0.043648	0.22635	FALSE
TMEM30B_11	TMEM30B	490.13/424.35/521.42	181.01/527.43/229.72	490.13	229.72	-1.09	2652.9	16689	2.0172	0.021837	0.97816	0.043675	0.22635	FALSE
GAGE12B_3	GAGE12B	144.96/343.61/416.25	127.3/26.372/144.8	343.61	127.3	-1.4254	22370	11670	2.0159	0.021908	0.97809	0.043815	0.22686	FALSE
INSR_11	INSR	406.78/305.93/239.75	92.494/103.09/350.57	305.93	103.09	-1.5601	7275.5	10382	2.0151	0.021945	0.97805	0.04389	0.22708	FALSE
CCDC22_15	CCDC22	197.5/485.36/642.03	226.76/473.49/137.18	485.36	226.76	-1.0945	53704	16525	2.0132	0.022049	0.97795	0.044098	0.22796	FALSE
SPNS1_14	SPNS1	840.74/1030.8/610.41	416.72/555/499.72	840.74	499.72	-0.74936	44594	28736	2.0117	0.022125	0.97787	0.044251	0.22865	FALSE
WDR7_8	WDR7	375.98/609.17/601.58	527.12/140.25/313.55	601.58	313.55	-0.93786	25477	20513	2.0113	0.022148	0.97785	0.044295	0.22875	FALSE
RAB5C_6	RAB5C	860.68/654.03/484.65	757.85/353.62/325.53	654.03	353.62	-0.88527	35696	22315	2.0111	0.022157	0.97784	0.044314	0.22875	FALSE
SLC7A6OS_3	SLC7A6OS	571.67/582.25/399.34	291.41/395.58/194.88	571.67	291.41	-0.96973	14905	19486	2.0081	0.022316	0.97768	0.044631	0.22984	FALSE
STT3A_3	STT3A	488.32/366.94/502.3	267.54/175.01/229.72	488.32	229.72	-1.0846	7464.8	16627	2.0069	0.022379	0.97762	0.044758	0.2304	FALSE
STRAP_13	STRAP	286.29/393.85/340.5	126.31/41.955/194.88	340.5	126.31	-1.4236	2892.6	11564	2.0058	0.02244	0.97756	0.044879	0.23062	FALSE
CSNK1A1_6	CSNK1A1	784.57/475.49/402.28	201.9/220.56/339.68	475.49	220.56	-1.1047	50446	16187	2.0054	0.022458	0.97754	0.044917	0.23062	FALSE
HNRNPU_4	HNRNPU	236.46/91.51/232.4	254.61/61.134/0	232.4	61.134	-1.9093	9932.8	7871.2	2.0051	0.022476	0.97752	0.044952	0.23062	FALSE
INTS12_2	INTS12	748.34/770.66/745.73	202.89/610.15/427.87	748.34	427.87	-0.80507	252.51	25557	2.0046	0.022501	0.9775	0.045002	0.23068	FALSE
ZBTB17_14	ZBTB17	232.84/244.03/316.97	306.32/0/67.501	244.03	67.501	-1.8387	2723.1	8267.9	2.0037	0.022549	0.97745	0.045097	0.23098	FALSE
LAS1L_9	LAS1L	429.43/151.62/302.26	238.69/101.89/57.702	302.26	101.89	-1.5595	19433	10257	2.0037	0.022549	0.97745	0.045098	0.23098	FALSE
NonTargeting_Human_0246	NonTargeting_Human_0246	583.45/576.87/329.47	89.51/437.53/296.13	576.87	296.13	-0.95964	30624	19665	2.0023	0.022625	0.97737	0.045251	0.23153	FALSE
SLC35B2_2	SLC35B2	227.4/201.86/280.93	157.14/58.737/21.775	227.4	58.737	-1.9349	1759.1	7700.8	2.0022	0.022631	0.97737	0.045262	0.23153	FALSE
TMEM165_4	TMEM165	1020.1/1350.2/825.15	897.09/646.11/360.37	1020.1	646.11	-0.65809	73487	34916	2.0016	0.022662	0.97734	0.045323	0.23165	FALSE
MED26_14	MED26	753.77/764.38/813.39	306.32/441.13/744.69	764.38	441.13	-0.79171	1257.3	26109	2.0006	0.02272	0.97728	0.045441	0.23205	FALSE
TSPYL4_1	TSPYL4	435.77/549.96/560.4	276.49/388.38/200.33	549.96	276.49	-0.98951	6573.3	18741	1.9981	0.02285	0.97715	0.045701	0.23295	FALSE
TBXAS1_6	TBXAS1	379.6/330.15/325.06	120.34/33.564/551.98	330.15	120.34	-1.4484	1235.6	11210	1.9978	0.022871	0.97713	0.045742	0.23295	FALSE
ATP5F1_13	ATP5F1	196.6/71.772/195.62	182/1.1987/43.549	195.62	43.549	-2.142	7670.2	6617.7	1.9977	0.022876	0.97712	0.045751	0.23295	FALSE
HIST2H2AA3_3	HIST2H2AA3	189.35/209.93/116.93	293.4/40.756/19.597	189.35	40.756	-2.1886	2833.9	6403.9	1.9975	0.022885	0.97711	0.04577	0.23295	FALSE
RBM3_8	RBM3	731.12/759.89/414.05	782.72/220.56/415.89	731.12	415.89	-0.81241	50682	24965	1.9951	0.023015	0.97699	0.04603	0.23389	FALSE
PRELP_3	PRELP	374.17/714.14/722.19	526.12/402.77/302.67	714.14	402.77	-0.82469	57821	24381	1.9942	0.023068	0.97693	0.046135	0.23427	FALSE
ZNHIT1_15	ZNHIT1	265.45/109.45/278.73	80.559/219.36/64.235	265.45	80.559	-1.7079	12256	8999.2	1.9929	0.023137	0.97686	0.046274	0.2346	FALSE
hsa-mir-3680-1_7	hsa-mir-3680-1	366.01/278.12/585.4	115.37/187/144.8	366.01	144.8	-1.3318	27929	12437	1.9927	0.023146	0.97685	0.046292	0.2346	FALSE
PON1_8	PON1	305.31/431.53/436.85	128.3/254.13/190.53	431.53	190.53	-1.1753	7979.6	14680	1.9924	0.023164	0.97684	0.046328	0.2346	FALSE
MOCS3_8	MOCS3	396.82/306.83/406.69	166.09/159.43/412.63	396.82	166.09	-1.2515	4097.9	13491	1.992	0.023183	0.97682	0.046367	0.2346	FALSE
CTNNBIP1_1	CTNNBIP1	1157.8/1028.1/819.27	835.43/654.5/630.37	1028.1	654.5	-0.65078	30224	35192	1.9917	0.023199	0.9768	0.046399	0.2346	FALSE
RABIF_3	RABIF	255.48/410.9/546.43	176.04/230.15/165.49	410.9	176.04	-1.2182	21260	13973	1.9913	0.023222	0.97678	0.046445	0.23463	FALSE
NUDT5_6	NUDT5	780.04/826.28/314.76	382.91/696.45/455.09	780.04	455.09	-0.7761	109310	26648	1.9907	0.023258	0.97674	0.046516	0.23481	FALSE
CHMP1A_7	CHMP1A	459.33/758.1/333.89	210.85/160.63/251.5	459.33	210.85	-1.1196	52499	15633	1.9895	0.023324	0.97668	0.046647	0.23526	FALSE
PPIL2_2	PPIL2	273.6/136.37/214.75	213.83/1.1987/53.348	214.75	53.348	-1.989	4803.7	7269.3	1.9876	0.023427	0.97657	0.046854	0.23611	FALSE
ARFRP1_2	ARFRP1	732.03/726.7/66.924	413.74/284.1/519.32	726.7	413.74	-0.81114	217660	24813	1.9868	0.023471	0.97653	0.046943	0.23626	FALSE
HSPE1_3	HSPE1	153.11/257.48/249.31	169.08/70.724/71.856	249.31	71.856	-1.7806	4660.8	8448.3	1.9863	0.023502	0.9765	0.047003	0.23642	FALSE
NonTargeting_Human_0737	NonTargeting_Human_0737	359.67/337.33/433.17	141.23/75.519/326.62	359.67	141.23	-1.3425	2950.5	12220	1.986	0.023515	0.97648	0.04703	0.23642	FALSE
DAP3_2	DAP3	395.01/251.2/180.92	26.853/104.29/72.945	251.2	72.945	-1.7701	12810	8512.9	1.986	0.023516	0.97648	0.047032	0.23642	FALSE
CORO1A_10	CORO1A	403.16/471.01/448.61	136.25/236.15/203.59	448.61	203.59	-1.1359	1283.8	15265	1.9856	0.023539	0.97646	0.047077	0.23655	FALSE
PTCHD4_5	PTCHD4	303.5/494.33/182.39	75.587/106.69/104.52	303.5	104.52	-1.529	25543	10299	1.9846	0.023595	0.9764	0.04719	0.23692	FALSE
PHKG2_15	PHKG2	356.95/190.2/233.13	103.43/55.141/63.146	233.13	63.146	-1.8679	8587.7	7896.3	1.984	0.02363	0.97637	0.04726	0.23694	FALSE
MTFP1_1	MTFP1	353.33/329.26/447.14	519.16/13.186/137.18	353.33	137.18	-1.3586	4690.1	12003	1.9839	0.023636	0.97636	0.047272	0.23694	FALSE
MSTO1_3	MSTO1	353.33/221.6/590.55	98.461/457.91/137.18	353.33	137.18	-1.3586	36814	12003	1.9839	0.023636	0.97636	0.047272	0.23694	FALSE
GREB1L_6	GREB1L	224.68/238.64/164.74	64.646/58.737/38.105	224.68	58.737	-1.9176	1894.2	7608.1	1.9832	0.023672	0.97633	0.047344	0.23711	FALSE
NHLRC2_9	NHLRC2	107.81/474.59/271.37	164.1/55.141/84.921	271.37	84.921	-1.6645	34026	9201.5	1.983	0.023683	0.97632	0.047366	0.23712	FALSE
SUMO2_10	SUMO2	299.88/184.81/641.3	102.44/208.58/81.654	299.88	102.44	-1.5404	64903	10175	1.9824	0.023715	0.97629	0.04743	0.23718	FALSE
CPM_13	CPM	246.43/390.26/48.538	70.614/0/88.187	246.43	70.614	-1.7887	29924	8349.8	1.9817	0.023759	0.97624	0.047518	0.23749	FALSE
SRP19_3	SRP19	374.17/225.19/363.3	144.21/118.67/206.86	363.3	144.21	-1.327	9597.2	12344	1.9812	0.023782	0.97622	0.047564	0.23753	FALSE
C11orf57_1	C11orf57	916.85/581.36/473.62	327.21/258.92/302.67	581.36	302.67	-0.93942	62081	19819	1.9799	0.023855	0.97615	0.047709	0.23789	FALSE
IPO9_13	IPO9	452.99/87.921/417.73	248.64/182.2/80.566	417.73	182.2	-1.1925	55007	14207	1.9799	0.023857	0.97614	0.047714	0.23789	FALSE
UBA2_1	UBA2	111.43/99.584/107.37	13.924/0/33.75	107.37	13.924	-2.8603	38.582	3616.8	1.9792	0.023896	0.9761	0.047792	0.23818	FALSE
PAGE4_9	PAGE4	857.96/785.01/1109	519.16/804.34/456.18	857.96	519.16	-0.72363	34179	29329	1.9783	0.023947	0.97605	0.047894	0.2384	FALSE
PPP1CB_6	PPP1CB	296.25/99.584/380.95	61.663/100.69/140.45	296.25	100.69	-1.5475	22926	10051	1.9769	0.024025	0.97597	0.04805	0.23888	FALSE
HIST2H2AA3_14	HIST2H2AA3	425.81/369.63/151.5	149.18/322.45/33.75	369.63	149.18	-1.3032	25368	12560	1.9753	0.024119	0.97588	0.048238	0.23952	FALSE
ATP6AP2_11	ATP6AP2	199.31/56.521/161.06	74.592/0/30.484	161.06	30.484	-2.3638	6195.9	5440.9	1.9739	0.024197	0.9758	0.048393	0.2402	FALSE
THOC6_2	THOC6	355.14/462.03/641.3	214.82/324.85/198.15	462.03	214.82	-1.1013	21780	15725	1.9733	0.02423	0.97577	0.048459	0.24023	FALSE
USP39_15	USP39	443.93/549.96/154.44	201.9/538.22/124.11	443.93	201.9	-1.1328	47522	15105	1.9719	0.02431	0.97569	0.048621	0.24049	FALSE
EIF2B4_9	EIF2B4	383.23/371.42/453.76	157.14/388.38/158.95	383.23	158.95	-1.2643	2557.2	13026	1.9717	0.024321	0.97568	0.048641	0.24049	FALSE
KMT2D_5	KMT2D	753.77/1012.9/396.4	395.83/437.53/523.68	753.77	437.53	-0.78336	97429	25744	1.971	0.024362	0.97564	0.048724	0.24049	FALSE
CCDC115_5	CCDC115	701.22/444.09/558.19	286.43/375.2/205.77	558.19	286.43	-0.96012	16739	19024	1.9708	0.024375	0.97562	0.04875	0.24049	FALSE
WDR37_7	WDR37	723.87/806.54/812.65	479.38/432.74/1304.3	806.54	479.38	-0.74937	3435.7	27559	1.9708	0.024376	0.97562	0.048751	0.24049	FALSE
JAK1_9	JAK1	616.97/448.58/483.18	909.03/206.18/230.81	483.18	230.81	-1.0626	9548.6	16450	1.9691	0.024473	0.97553	0.048946	0.24088	FALSE
CSNK1A1_10	CSNK1A1	482.88/347.2/475.09	202.89/225.36/226.45	475.09	225.36	-1.0726	8208.3	16173	1.9653	0.02469	0.97531	0.049381	0.24265	FALSE
GNB1L_13	GNB1L	289.91/457.55/364.77	55.695/164.22/146.98	364.77	146.98	-1.3056	7105.8	12394	1.9651	0.024702	0.9753	0.049403	0.24265	FALSE
GPN2_6	GPN2	324.34/527.53/241.22	289.42/119.87/90.364	324.34	119.87	-1.4285	24097	11011	1.9651	0.024703	0.9753	0.049406	0.24265	FALSE
TAF2_3	TAF2	273.6/274.53/350.8	88.516/99.493/0	274.53	88.516	-1.622	2909.1	9309.2	1.9639	0.024769	0.97523	0.049539	0.2431	FALSE
RBM3_14	RBM3	540.87/320.28/1139.2	255.6/274.51/365.81	540.87	274.51	-0.97586	203320	18429	1.9627	0.024843	0.97516	0.049685	0.24354	FALSE
SP140_3	SP140	461.14/507.79/399.34	215.82/122.27/321.17	461.14	215.82	-1.0918	2997.8	15695	1.9601	0.024989	0.97501	0.049979	0.24473	FALSE
MTA2_2	MTA2	509.16/316.7/304.47	305.33/99.493/115.4	316.7	115.4	-1.4485	18596	10750	1.9599	0.025004	0.975	0.050008	0.24473	FALSE
CAND1_9	CAND1	78.82/326.56/231.66	204.88/44.352/64.235	231.66	64.235	-1.8345	16184	7846.1	1.9596	0.025023	0.97498	0.050047	0.24479	FALSE
PES1_1	PES1	171.23/336.43/422.87	346.11/52.743/128.47	336.43	128.47	-1.382	17382	11425	1.9592	0.025046	0.97495	0.050093	0.24485	FALSE
IGF1R_13	IGF1R	790.92/459.34/650.86	359.04/352.42/501.9	650.86	359.04	-0.85641	28147	22206	1.9584	0.02509	0.97491	0.050181	0.24508	FALSE
PGS1_13	PGS1	491.04/300.55/314.76	279.47/99.493/114.32	314.76	114.32	-1.4533	15637	10684	1.9582	0.025101	0.9749	0.050202	0.24509	FALSE
EXOC2_9	EXOC2	142.24/436.91/353.74	175.04/140.25/33.75	353.74	140.25	-1.3285	25826	12017	1.9578	0.025125	0.97488	0.05025	0.24522	FALSE
ATP13A1_1	ATP13A1	386.85/338.23/394.93	163.11/252.93/139.36	386.85	163.11	-1.2409	1214.8	13150	1.9573	0.025158	0.97484	0.050317	0.24525	FALSE
VPS33A_14	VPS33A	185.72/648.64/553.04	284.44/202.58/579.2	553.04	284.44	-0.95679	72031	18847	1.957	0.025174	0.97483	0.050348	0.24531	FALSE
CSNK2A2_3	CSNK2A2	1050.9/763.48/539.07	447.55/308.07/852.47	763.48	447.55	-0.7692	66494	26078	1.9564	0.025209	0.97479	0.050419	0.24556	FALSE
DENND4A_6	DENND4A	176.67/395.65/330.21	95.478/124.67/284.16	330.21	124.67	-1.3981	13929	11212	1.956	0.025234	0.97477	0.050467	0.2456	FALSE
MBTPS1_9	MBTPS1	202.94/367.83/475.09	150.18/245.74/35.928	367.83	150.18	-1.2867	19347	12499	1.955	0.025289	0.97471	0.050578	0.24589	FALSE
SMNDC1_2	SMNDC1	455.71/607.37/611.88	273.5/326.05/828.52	607.37	326.05	-0.89545	11512	20712	1.955	0.025294	0.97471	0.050587	0.24589	FALSE
METTL14_13	METTL14	227.4/176.74/231.66	284.44/62.333/31.573	227.4	62.333	-1.8505	1292.3	7700.8	1.9544	0.025326	0.97467	0.050652	0.246	FALSE
SUMO2_5	SUMO2	283.57/496.13/332.41	126.31/412.36/109.96	332.41	126.31	-1.389	14594	11287	1.9542	0.025337	0.97466	0.050674	0.24601	FALSE
HYPK_13	HYPK	0/90.613/156.65	10.94/0/22.863	90.613	10.94	-2.9397	6285.6	3048.6	1.953	0.025407	0.97459	0.050815	0.24656	FALSE
CAPZB_8	CAPZB	322.53/513.17/398.6	172.06/359.61/164.4	398.6	172.06	-1.2073	9456.8	13552	1.9511	0.025525	0.97447	0.051051	0.24697	FALSE
STRAP_12	STRAP	1064.5/549.96/574.37	419.7/68.327/301.58	574.37	301.58	-0.92719	120420	19579	1.9499	0.025593	0.97441	0.051186	0.24752	FALSE
TAF1_8	TAF1	371.45/412.69/420.67	130.29/182.2/265.65	412.69	182.2	-1.1751	882.23	14035	1.9496	0.025613	0.97439	0.051226	0.24761	FALSE
EXOC2_4	EXOC2	369.64/876.52/221.36	152.17/158.23/79.477	369.64	152.17	-1.2749	139460	12561	1.9483	0.025691	0.97431	0.051383	0.24827	FALSE
MRPS21_4	MRPS21	119.59/151.62/36.036	208.86/17.981/17.42	119.59	17.981	-2.6675	4003.5	4031.4	1.9479	0.025716	0.97428	0.051432	0.24841	FALSE
SSR2_3	SSR2	289.01/161.49/294.17	66.636/103.09/99.074	289.01	99.074	-1.535	8143.8	9803.7	1.946	0.025829	0.97417	0.051658	0.2493	FALSE
NMT1_6	NMT1	505.53/228.77/650.12	447.55/192.99/250.41	505.53	250.41	-1.0106	48751	17217	1.9453	0.025868	0.97413	0.051736	0.24958	FALSE
RTBDN_1	RTBDN	923.19/964.44/432.43	527.12/577.78/675.01	923.19	577.78	-0.67517	121270	31575	1.9438	0.025958	0.97404	0.051915	0.25035	FALSE
hsa-mir-6831_9	hsa-mir-6831	338.83/492.54/222.1	152.17/81.513/131.74	338.83	131.74	-1.3563	18626	11507	1.9433	0.025993	0.97401	0.051986	0.25058	FALSE
PTAR1_10	PTAR1	396.82/445.89/453.76	206.87/1.1987/308.11	445.89	206.87	-1.1042	1234.9	15172	1.9429	0.026017	0.97398	0.052034	0.25058	FALSE
TAF7_4	TAF7	343.36/120.22/252.99	77.576/50.346/84.921	252.99	77.576	-1.6926	12898	8573.8	1.9428	0.026021	0.97398	0.052043	0.25058	FALSE
hsa-mir-6770-1_9	hsa-mir-6770-1	1063.6/800.26/1036.2	670.33/495.07/989.65	1036.2	670.33	-0.62762	28214	35470	1.9428	0.026023	0.97398	0.052046	0.25058	FALSE
PEX6_12	PEX6	479.26/404.62/294.17	112.39/177.41/300.49	404.62	177.41	-1.1849	8884.8	13758	1.9415	0.026096	0.9739	0.052192	0.25119	FALSE
SPSB3_13	SPSB3	1293.7/1768.3/1391.4	1104/967.36/950.46	1391.4	967.36	-0.52399	75783	47729	1.9411	0.026123	0.97388	0.052245	0.25122	FALSE
GMPPB_12	GMPPB	160.36/269.15/252.25	15.913/206.18/77.299	252.25	77.299	-1.6935	4365.1	8548.7	1.941	0.02613	0.97387	0.052261	0.25122	FALSE
CCDC43_13	CCDC43	445.74/771.55/682.48	645.47/197.79/386.5	682.48	386.5	-0.81871	31990	23293	1.9394	0.026225	0.97377	0.05245	0.25194	FALSE
PRPF38B_1	PRPF38B	231.02/214.42/98.548	134.27/0/56.614	214.42	56.614	-1.9027	6851	7258.2	1.9394	0.026226	0.97377	0.052452	0.25194	FALSE
ST6GAL1_3	ST6GAL1	811.75/575.97/1128.2	416.72/608.95/488.84	811.75	488.84	-0.73051	77850	27739	1.9389	0.026259	0.97374	0.052517	0.25213	FALSE
NHLRC2_6	NHLRC2	360.58/519.45/190.48	224.77/58.737/146.98	360.58	146.98	-1.2889	27088	12251	1.9387	0.026267	0.97373	0.052534	0.25213	FALSE
TPI1_3	TPI1	243.71/62.801/247.1	72.603/0/74.033	243.71	72.603	-1.7332	16369	8257.1	1.9384	0.026288	0.97371	0.052575	0.25223	FALSE
hsa-mir-550a-1_6	hsa-mir-550a-1	693.07/767.07/944.29	453.52/369.2/917.8	767.07	453.52	-0.75689	18442	26201	1.9371	0.026368	0.97363	0.052735	0.2526	FALSE
DCPS_1	DCPS	459.33/745.54/751.61	436.61/443.52/415.89	745.54	436.61	-0.77056	40975	25461	1.9361	0.026429	0.97357	0.052858	0.25286	FALSE
TREM1_15	TREM1	875.17/957.26/492	624.58/540.62/388.67	875.17	540.62	-0.69393	76779	29922	1.9341	0.026553	0.97345	0.053105	0.25378	FALSE
GOLGA6A_9	GOLGA6A	426.71/111.25/437.58	152.17/194.19/283.07	426.71	194.19	-1.1318	49819	14515	1.9331	0.02661	0.97339	0.053221	0.2541	FALSE
TRIAP1_7	TRIAP1	317.09/172.25/325.06	118.35/503.46/104.52	317.09	118.35	-1.4142	10521	10763	1.933	0.026617	0.97338	0.053235	0.2541	FALSE
KAT7_7	KAT7	346.08/258.38/144.88	247.65/14.385/81.654	258.38	81.654	-1.6499	10287	8757.8	1.932	0.026679	0.97332	0.053358	0.25457	FALSE
EPAS1_8	EPAS1	523.65/471.01/405.22	226.76/314.06/226.45	471.01	226.76	-1.0513	3549.6	16033	1.9305	0.026771	0.97323	0.053542	0.25524	FALSE
LSM7_12	LSM7	195.69/214.42/148.56	139.24/0/47.904	195.69	47.904	-2.0079	1286.2	6619.9	1.9302	0.026789	0.97321	0.053578	0.25524	FALSE
KCTD5_12	KCTD5	538.15/392.06/669.98	265.55/276.9/384.32	538.15	276.9	-0.9561	19361	18336	1.9299	0.026812	0.97319	0.053624	0.25526	FALSE
RANBP1_8	RANBP1	818.1/439.61/731.75	431.64/225.36/426.78	731.75	426.78	-0.77646	46403	24987	1.9294	0.026842	0.97316	0.053685	0.25526	FALSE
INPP5J_10	INPP5J	917.75/731.18/1094.3	444.57/783.96/575.94	917.75	575.94	-0.67127	32993	31388	1.9294	0.026843	0.97316	0.053687	0.25526	FALSE
PKD1_6	PKD1	370.54/569.69/490.53	345.11/85.109/241.7	490.53	241.7	-1.0181	10332	16702	1.9266	0.027017	0.97298	0.054035	0.25601	FALSE
CCDC22_2	CCDC22	713.91/840.63/1117.9	514.19/364.41/532.39	840.63	514.19	-0.7081	46456	28733	1.9259	0.027061	0.97294	0.054121	0.25619	FALSE
MID1_4	MID1	195.69/492.54/503.04	197.92/243.34/777.35	492.54	243.34	-1.0143	44114	16771	1.9254	0.027091	0.97291	0.054182	0.25619	FALSE
UXT_9	UXT	407.69/156.1/209.6	21.88/55.141/137.18	209.6	55.141	-1.9074	21051	7093.8	1.9253	0.027097	0.9729	0.054195	0.25619	FALSE
TSPYL4_15	TSPYL4	1348.1/1182.4/1354.7	1654.9/933.8/934.13	1348.1	934.13	-0.52875	13740	46232	1.9253	0.027098	0.9729	0.054195	0.25619	FALSE
C16orf62_4	C16orf62	317.09/758.1/327.27	191.95/125.87/94.719	327.27	125.87	-1.3716	92859	11111	1.9253	0.027098	0.9729	0.054197	0.25619	FALSE
NMT1_3	NMT1	260.92/220.7/90.458	42.766/89.904/60.969	220.7	60.969	-1.839	9290.3	7472.3	1.9249	0.02712	0.97288	0.05424	0.25621	FALSE
IGF1R_14	IGF1R	560.8/895.36/664.83	374.95/175.01/713.11	664.83	374.95	-0.82462	31983	22686	1.9247	0.027135	0.97287	0.054269	0.25623	FALSE
EMC6_5	EMC6	941.31/1942.3/1066.4	794.65/698.85/536.74	1066.4	698.85	-0.60895	391480	36510	1.9235	0.027212	0.97279	0.054423	0.25686	FALSE
EBP_8	EBP	909.6/660.31/670.71	451.53/379.99/286.33	670.71	379.99	-0.81808	28587	22888	1.9217	0.027321	0.97268	0.054643	0.25727	FALSE
EXOC1_12	EXOC1	459.33/793.98/396.4	141.23/219.36/311.38	459.33	219.36	-1.0628	57976	15633	1.9211	0.02736	0.97264	0.054721	0.25746	FALSE
hsa-mir-3680-1_5	hsa-mir-3680-1	282.66/183.92/457.44	97.467/1.1987/288.51	282.66	97.467	-1.5265	20149	9587	1.9206	0.027391	0.97261	0.054781	0.25755	FALSE
HDAC6_4	HDAC6	890.57/536.5/825.89	503.25/460.31/622.75	825.89	503.25	-0.71356	43966	28225	1.9205	0.0274	0.9726	0.0548	0.25755	FALSE
POLR2L_10	POLR2L	144.05/264.66/339.03	86.527/55.141/111.05	264.66	86.527	-1.6018	10039	8972.2	1.9192	0.027482	0.97252	0.054965	0.25804	FALSE
CDC73_13	CDC73	487.41/226.98/630.26	494.3/233.75/240.61	487.41	240.61	-1.0154	44116	16595	1.917	0.027617	0.97238	0.055234	0.25868	FALSE
SBK1_14	SBK1	784.57/751.82/664.09	376.94/444.72/619.48	751.82	444.72	-0.75615	4384.1	25677	1.9165	0.027652	0.97235	0.055303	0.25881	FALSE
USO1_14	USO1	718.44/679.15/322.12	204.88/466.3/387.59	679.15	387.59	-0.80761	64506	23178	1.9152	0.027736	0.97226	0.055472	0.2595	FALSE
SEZ6L2_2	SEZ6L2	110.53/279.02/236.81	70.614/0/83.832	236.81	70.614	-1.7315	8864	8021.7	1.9146	0.027773	0.97223	0.055545	0.25974	FALSE
HIST2H2BF_5	HIST2H2BF	863.39/892.67/710.43	720.06/334.44/534.56	863.39	534.56	-0.69063	12128	29516	1.914	0.02781	0.97219	0.05562	0.25985	FALSE
RABIF_13	RABIF	975.74/850.5/1022.2	523.14/834.31/626.02	975.74	626.02	-0.63946	8923.4	33386	1.914	0.027811	0.97219	0.055622	0.25985	FALSE
GCFC2_13	GCFC2	30.803/147.13/138.26	100.45/0/25.041	138.26	25.041	-2.419	5813	4665.7	1.9138	0.027824	0.97218	0.055648	0.25985	FALSE
POLRMT_9	POLRMT	484.7/663.89/664.83	375.94/566.99/375.61	663.89	375.94	-0.81878	16056	22654	1.9132	0.02786	0.97214	0.055719	0.25986	FALSE
CAND1_2	CAND1	561.7/472.8/611.88	468.44/189.4/297.22	561.7	297.22	-0.91599	5210.7	19144	1.9119	0.027945	0.97206	0.05589	0.26036	FALSE
COPS8_11	COPS8	610.63/986.87/493.47	335.17/152.24/649.97	610.63	335.17	-0.86348	77642	20824	1.9091	0.028127	0.97187	0.056255	0.26154	FALSE
TRA2B_2	TRA2B	594.32/708.75/640.56	237.7/358.42/395.21	640.56	358.42	-0.83593	3394.2	21852	1.9088	0.028146	0.97185	0.056293	0.26154	FALSE
ZNF22_7	ZNF22	609.72/228.77/510.39	480.37/258.92/177.46	510.39	258.92	-0.97634	44587	17383	1.9081	0.02819	0.97181	0.056379	0.26184	FALSE
ELP3_10	ELP3	419.47/231.47/385.37	162.11/357.22/167.66	385.37	167.66	-1.1958	12424	13099	1.9078	0.028207	0.97179	0.056415	0.2619	FALSE
EIF2B4_5	EIF2B4	188.44/72.67/100.02	38.788/1.1987/14.153	100.02	14.153	-2.7369	4283.4	3367.4	1.9066	0.028287	0.97171	0.056573	0.26218	FALSE
RNF151_6	RNF151	595.23/514.07/653.06	293.4/323.65/526.94	595.23	323.65	-0.87696	4965.7	20295	1.9065	0.028291	0.97171	0.056582	0.26218	FALSE
TAF8_12	TAF8	485.6/316.7/564.08	240.68/231.35/346.21	485.6	240.68	-1.0096	17344	16533	1.906	0.028328	0.97167	0.056656	0.26242	FALSE
INTS2_9	INTS2	144.96/28.709/208.13	27.848/28.769/0	144.96	27.848	-2.339	8752	4893.2	1.9037	0.028475	0.97153	0.056949	0.26342	FALSE
PPP1R8_5	PPP1R8	298.07/196.48/492.74	48.733/425.54/108.87	298.07	108.87	-1.4446	24109	10113	1.9035	0.028489	0.97151	0.056978	0.26342	FALSE
IRS1_8	IRS1	635.09/621.73/953.85	355.06/468.7/229.72	635.09	355.06	-0.83712	50895	21664	1.9027	0.028542	0.97146	0.057084	0.26374	FALSE
SYS1_12	SYS1	348.8/523.94/387.57	66.636/246.94/169.84	387.57	169.84	-1.1855	10049	13175	1.9024	0.028562	0.97144	0.057124	0.26374	FALSE
EEFSEC_12	EEFSEC	540.87/346.3/540.54	282.45/264.92/598.8	540.54	282.45	-0.93395	18865	18418	1.9022	0.028571	0.97143	0.057142	0.26374	FALSE
WDR7_14	WDR7	616.06/559.82/183.86	438.6/297.28/190.53	559.82	297.28	-0.91088	72257	19080	1.9011	0.028645	0.97135	0.05729	0.26408	FALSE
IL17RA_4	IL17RA	879.7/757.2/635.41	451.53/245.74/631.46	757.2	451.53	-0.74456	14919	25862	1.9008	0.028667	0.97133	0.057334	0.26408	FALSE
LRRC8A_3	LRRC8A	730.22/800.26/285.35	542.04/430.34/357.1	730.22	430.34	-0.76148	101410	24934	1.8991	0.028773	0.97123	0.057546	0.26429	FALSE
STT3A_7	STT3A	217.43/224.29/148.56	63.652/61.134/1.0887	217.43	61.134	-1.8137	2395.5	7360.9	1.8991	0.028775	0.97123	0.057549	0.26429	FALSE
NonTargeting_Human_0623	NonTargeting_Human_0623	713/662.1/495.68	667.35/173.81/376.7	662.1	376.7	-0.81199	15143	22592	1.8989	0.028791	0.97121	0.057582	0.26429	FALSE
MEF2BNB_9	MEF2BNB	391.38/498.82/359.63	173.05/112.68/237.34	391.38	173.05	-1.1727	6275.5	13305	1.8979	0.028858	0.97114	0.057715	0.26464	FALSE
CCT8_2	CCT8	382.32/217.11/302.26	230.74/35.961/112.14	302.26	112.14	-1.4225	6830.1	10257	1.8978	0.028859	0.97114	0.057719	0.26464	FALSE
TMEM30A_4	TMEM30A	249.14/1052.4/617.03	268.53/744.4/341.86	617.03	341.86	-0.85005	162430	21044	1.897	0.028913	0.97109	0.057825	0.26485	FALSE
TM9SF2_5	TM9SF2	497.38/772.45/489.8	250.63/468.7/230.81	497.38	250.63	-0.98595	37861	16937	1.897	0.028916	0.97108	0.057831	0.26485	FALSE
EXOC4_7	EXOC4	414.03/269.15/473.62	211.84/115.08/189.44	414.03	189.44	-1.1239	12271	14081	1.8963	0.028963	0.97104	0.057926	0.26507	FALSE
HYOU1_4	HYOU1	444.83/456.65/358.89	211.84/105.49/246.05	444.83	211.84	-1.0667	3763	15136	1.896	0.028979	0.97102	0.057958	0.26507	FALSE
CORO1A_13	CORO1A	735.65/1139.4/959.74	599.72/684.47/616.22	959.74	616.22	-0.63836	41244	32834	1.8958	0.028995	0.97101	0.05799	0.26507	FALSE
STOML3_14	STOML3	359.67/565.21/269.9	371.97/151.04/119.76	359.67	151.04	-1.2463	25152	12220	1.8957	0.029003	0.971	0.058006	0.26507	FALSE
TCERG1_13	TCERG1	393.19/846.91/626.59	335.17/468.7/349.48	626.59	349.48	-0.84048	51508	21372	1.8956	0.029004	0.971	0.058008	0.26507	FALSE
NCOR1_2	NCOR1	494.66/474.59/261.08	168.08/475.89/234.08	474.59	234.08	-1.0166	22996	16156	1.8936	0.029136	0.97086	0.058272	0.26617	FALSE
PEX6_4	PEX6	784.57/847.81/729.55	502.25/474.69/413.72	784.57	474.69	-0.72372	3513.4	26803	1.8928	0.029192	0.97081	0.058384	0.26658	FALSE
WBSCR16_15	WBSCR16	307.13/305.93/160.32	291.41/115.08/16.331	305.93	115.08	-1.4028	10601	10382	1.8923	0.029228	0.97077	0.058456	0.2667	FALSE
TAF10_2	TAF10	221.06/147.13/319.18	63.652/58.737/99.074	221.06	63.652	-1.7802	7546.1	7484.5	1.8916	0.02927	0.97073	0.058541	0.2667	FALSE
EXOC3_3	EXOC3	459.33/400.13/254.46	180.02/192.99/87.098	400.13	180.02	-1.148	12362	13605	1.8915	0.029277	0.97072	0.058554	0.2667	FALSE
EWSR1_3	EWSR1	464.77/479.98/592.02	110.4/238.54/321.17	479.98	238.54	-1.0057	6392.7	16340	1.89	0.029381	0.97062	0.058762	0.26727	FALSE
PIAS1_8	PIAS1	990.23/1184.2/738.37	625.58/817.52/642.35	990.23	642.35	-0.62362	50537	33885	1.8899	0.029389	0.97061	0.058777	0.26727	FALSE
DNAJC18_4	DNAJC18	626.03/248.51/428.02	299.36/159.43/200.33	428.02	200.33	-1.0915	35715	14560	1.8898	0.02939	0.97061	0.05878	0.26727	FALSE
VPS35_12	VPS35	645.96/1710/673.66	507.23/387.18/289.6	673.66	387.18	-0.79741	537370	22989	1.8894	0.029417	0.97058	0.058833	0.26727	FALSE
OSTC_2	OSTC	348.8/469.21/494.95	230.74/346.43/203.59	469.21	230.74	-1.0208	7580.6	15971	1.8885	0.029481	0.97052	0.058963	0.26752	FALSE
SLX4_7	SLX4	551.74/325.67/458.91	154.16/374/223.19	458.91	223.19	-1.0366	13185	15618	1.8879	0.029519	0.97048	0.059038	0.26757	FALSE
SLC35A2_3	SLC35A2	914.13/1073.9/1033.3	678.29/468.7/979.85	1033.3	678.29	-0.60653	7923.4	35369	1.8876	0.029541	0.97046	0.059082	0.26767	FALSE
STARD4_6	STARD4	55.264/546.37/271.37	93.489/312.86/91.453	271.37	93.489	-1.5274	61162	9201.5	1.8871	0.029573	0.97043	0.059146	0.26776	FALSE
PAM16_14	PAM16	221.96/151.62/0	204.88/31.167/0	151.62	31.167	-2.2463	13968	5119.8	1.8866	0.029607	0.97039	0.059213	0.26782	FALSE
WDR7_11	WDR7	311.66/274.53/308.88	1.9891/170.22/117.58	308.88	117.58	-1.3858	593.87	10483	1.8865	0.029613	0.97039	0.059226	0.26782	FALSE
YPEL1_6	YPEL1	733.84/485.36/603.79	308.31/348.83/333.15	603.79	333.15	-0.85594	15469	20589	1.8863	0.029626	0.97037	0.059252	0.26784	FALSE
PLA2G10_10	PLA2G10	535.43/336.43/494.95	193.94/370.4/250.41	494.95	250.41	-0.98016	13383	16854	1.8846	0.02974	0.97026	0.059479	0.26842	FALSE
ARPC3_8	ARPC3	414.03/289.78/404.49	183.99/92.301/391.94	404.49	183.99	-1.1322	6624.3	13754	1.8841	0.029773	0.97023	0.059546	0.26857	FALSE
ANKRD35_9	ANKRD35	1335.4/1094.5/1174.5	694.2/1191.5/796.95	1174.5	796.95	-0.55889	16145	40239	1.8821	0.029913	0.97009	0.059826	0.26964	FALSE
PSMD9_3	PSMD9	385.95/565.21/543.48	287.43/192.99/565.05	543.48	287.43	-0.91668	12645	18519	1.8821	0.029913	0.97009	0.059826	0.26964	FALSE
NOMO1_15	NOMO1	455.71/499.72/276.52	244.66/129.46/222.1	455.71	222.1	-1.0336	17022	15508	1.8776	0.030215	0.96978	0.06043	0.27196	FALSE
MRPL9_10	MRPL9	973.92/864.86/560.4	542.04/450.72/808.92	864.86	542.04	-0.67308	52295	29567	1.8774	0.03023	0.96977	0.060459	0.27199	FALSE
NFRKB_15	NFRKB	433.96/216.21/528.78	353.07/206.18/107.78	433.96	206.18	-1.07	28202	14763	1.8772	0.030246	0.96975	0.060492	0.27203	FALSE
CAPN15_13	CAPN15	816.28/1000.3/1059.8	924.94/653.3/468.15	1000.3	653.3	-0.61389	18702	34233	1.8756	0.030355	0.96965	0.060709	0.27281	FALSE
ELP3_4	ELP3	406.78/418.07/855.31	554.96/55.141/194.88	418.07	194.88	-1.0972	95650	14219	1.8749	0.030401	0.9696	0.060803	0.27303	FALSE
TBC1D25_3	TBC1D25	620.59/784.11/672.18	280.47/388.38/439.84	672.18	388.38	-0.78981	7594.9	22939	1.8739	0.030473	0.96953	0.060946	0.27328	FALSE
WRB_3	WRB	509.16/1117.9/450.08	341.13/262.52/26.129	509.16	262.52	-0.95304	187000	17341	1.8737	0.030485	0.96952	0.06097	0.27328	FALSE
INTS1_5	INTS1	293.54/183.92/400.07	104.43/143.85/108.87	293.54	108.87	-1.4226	11683	9958.4	1.8729	0.030539	0.96946	0.061077	0.27347	FALSE
CTNNBIP1_13	CTNNBIP1	516.41/215.32/277.26	98.461/23.974/200.33	277.26	98.461	-1.4842	30514	9402.4	1.8729	0.03054	0.96946	0.061081	0.27347	FALSE
SCARB1_13	SCARB1	628.75/610.96/608.2	363.01/167.82/340.77	610.96	340.77	-0.84041	161.95	20835	1.872	0.030602	0.9694	0.061205	0.27385	FALSE
BTF3_6	BTF3	222.87/148.93/147.82	30.831/0/58.791	148.93	30.831	-2.2357	2734.3	5028.3	1.872	0.030605	0.96939	0.06121	0.27385	FALSE
STT3A_8	STT3A	413.12/317.59/500.09	235.71/191.79/162.22	413.12	191.79	-1.103	8344.9	14050	1.8707	0.030693	0.96931	0.061386	0.27432	FALSE
CARS_9	CARS	186.63/274.53/262.55	89.51/0/108.87	262.55	89.51	-1.5419	2953.5	8900.1	1.8706	0.030702	0.9693	0.061405	0.27432	FALSE
ATP6V0D1_9	ATP6V0D1	378.7/680.94/799.41	395.83/643.71/385.41	680.94	395.83	-0.78111	52693	23240	1.8703	0.030723	0.96928	0.061446	0.27441	FALSE
PIK3C3_3	PIK3C3	86.068/183.02/320.65	45.75/0/45.726	183.02	45.726	-1.9775	14171	6188.3	1.8694	0.030782	0.96922	0.061564	0.27473	FALSE
EXOC3_13	EXOC3	135.9/98.687/209.6	12.929/95.897/26.129	135.9	26.129	-2.3352	3408.2	4585.3	1.8689	0.030816	0.96918	0.061632	0.27493	FALSE
SERPINB5_4	SERPINB5	573.48/234.16/633.21	312.29/376.4/158.95	573.48	312.29	-0.87476	59354	19548	1.8684	0.030854	0.96915	0.061708	0.27507	FALSE
NCBP1_6	NCBP1	104.19/34.989/144.14	167.09/0/16.331	104.19	16.331	-2.6015	3192.5	3508.8	1.8673	0.030929	0.96907	0.061859	0.27564	FALSE
RAB7A_10	RAB7A	67.042/356.17/273.58	183.99/0/96.897	273.58	96.897	-1.4879	24740	9276.8	1.8647	0.031114	0.96889	0.062227	0.27652	FALSE
INTS1_4	INTS1	435.77/121.12/347.86	146.2/39.558/232.99	347.86	146.2	-1.2449	29571	11816	1.8646	0.031119	0.96888	0.062238	0.27652	FALSE
SLC35B2_8	SLC35B2	230.12/514.97/254.46	58.679/85.109/362.55	254.46	85.109	-1.5689	34228	8624	1.8644	0.03113	0.96887	0.06226	0.27652	FALSE
ZBTB8OS_13	ZBTB8OS	163.08/242.23/154.44	144.21/37.16/0	163.08	37.16	-2.1042	3170.1	5509.5	1.8615	0.031336	0.96866	0.062672	0.2776	FALSE
CSNK1A1_7	CSNK1A1	600.66/846.91/683.95	204.88/401.57/399.56	683.95	399.56	-0.77398	16747	23343	1.8614	0.031342	0.96866	0.062684	0.2776	FALSE
SETDB1_12	SETDB1	241.9/509.58/710.43	254.61/532.23/264.56	509.58	264.56	-0.94311	55998	17356	1.8606	0.031398	0.9686	0.062795	0.27799	FALSE
WDR61_5	WDR61	429.43/341.82/158.12	134.27/207.38/142.62	341.82	142.62	-1.2551	20711	11609	1.859	0.031515	0.96849	0.06303	0.27883	FALSE
ELP5_4	ELP5	262.73/316.7/264.02	91.5/7.1923/299.4	264.02	91.5	-1.5186	1388.2	8950.4	1.8583	0.031563	0.96844	0.063125	0.27905	FALSE
PIK3R4_8	PIK3R4	137.71/124.7/137.53	112.39/0/27.218	137.53	27.218	-2.2955	82.208	4640.7	1.8574	0.03163	0.96837	0.063261	0.27915	FALSE
MYOZ3_7	MYOZ3	432.15/715.93/822.21	574.86/321.26/425.69	715.93	425.69	-0.74864	45913	24442	1.8565	0.031693	0.96831	0.063386	0.27959	FALSE
PIAS1_6	PIAS1	375.07/436.91/381.69	125.31/341.63/170.93	381.69	170.93	-1.1544	1546.8	12973	1.8558	0.031739	0.96826	0.063479	0.27985	FALSE
DNAJC4_1	DNAJC4	462.95/380.39/201.51	170.07/167.82/225.37	380.39	170.07	-1.1567	19408	12929	1.8553	0.031779	0.96822	0.063557	0.27985	FALSE
S100A10_3	S100A10	334.3/494.33/165.47	85.532/137.85/165.49	334.3	137.85	-1.2719	27057	11352	1.8553	0.031779	0.96822	0.063559	0.27985	FALSE
TRA2B_6	TRA2B	363.3/578.66/545.69	333.18/267.31/292.87	545.69	292.87	-0.89556	17177	18595	1.8545	0.031835	0.96817	0.063669	0.28003	FALSE
COMMD3_14	COMMD3	179.38/591.22/236.81	32.82/75.519/226.45	236.81	75.519	-1.6359	64454	8021.7	1.8536	0.031899	0.9681	0.063798	0.28015	FALSE
FER_1	FER	576.2/701.58/106.64	103.43/316.46/442.02	576.2	316.46	-0.86249	118100	19642	1.8536	0.0319	0.9681	0.0638	0.28015	FALSE
NXPH2_6	NXPH2	414.94/710.55/493.47	398.82/232.55/253.67	493.47	253.67	-0.95725	26644	16803	1.8509	0.032094	0.96791	0.064188	0.28138	FALSE
GREB1L_4	GREB1L	451.18/336.43/743.52	238.69/191.79/222.1	451.18	222.1	-1.0192	49316	15353	1.8506	0.032115	0.96788	0.06423	0.28138	FALSE
TBX6_10	TBX6	1092.6/1385.2/1055.3	650.44/734.81/901.46	1092.6	734.81	-0.57168	43502	37414	1.8498	0.032175	0.96783	0.064349	0.2818	FALSE
STT3A_2	STT3A	359.67/363.35/127.23	156.15/28.769/231.9	359.67	156.15	-1.1986	27021	12220	1.8487	0.032249	0.96775	0.064497	0.28226	FALSE
CCDC22_3	CCDC22	261.83/472.8/528.04	303.34/210.97/238.43	472.8	238.43	-0.98467	23781	16094	1.8487	0.03225	0.96775	0.0645	0.28226	FALSE
NonTargeting_Human_0278	NonTargeting_Human_0278	583.45/822.69/878.11	437.61/513.05/691.34	822.69	513.05	-0.6802	30154	28115	1.8467	0.032397	0.9676	0.064794	0.28324	FALSE
DHX36_1	DHX36	684.92/925.86/651.59	402.8/303.27/689.16	684.92	402.8	-0.7644	29583	23376	1.8453	0.0325	0.9675	0.064999	0.28394	FALSE
SCYL1_2	SCYL1	154.92/244.03/500.83	80.559/110.28/57.702	244.03	80.559	-1.587	36944	8267.9	1.8441	0.032586	0.96741	0.065172	0.28439	FALSE
TAF1_12	TAF1	766.45/789.5/264.02	549/394.38/468.15	766.45	468.15	-0.71003	126490	26180	1.8436	0.032618	0.96738	0.065236	0.28446	FALSE
COPS8_4	COPS8	582.54/315.8/574.37	208.86/316.46/351.66	574.37	316.46	-0.85792	33463	19579	1.8435	0.032629	0.96737	0.065259	0.28446	FALSE
BOLA2_2	BOLA2	408.59/537.4/425.08	203.88/167.82/374.52	425.08	203.88	-1.0563	6443.4	14459	1.8422	0.032722	0.96728	0.065444	0.285	FALSE
HIST2H3A_12	HIST2H3A	789.1/776.94/509.65	370.97/783.96/476.86	776.94	476.86	-0.70306	35794	26541	1.8419	0.032742	0.96726	0.065483	0.28503	FALSE
PPAT_14	PPAT	373.26/178.53/213.28	231.73/50.346/63.146	213.28	63.146	-1.74	13401	7219.2	1.8414	0.032783	0.96722	0.065566	0.28529	FALSE
STT3A_4	STT3A	401.35/515.86/737.64	420.7/92.301/272.18	515.86	272.18	-0.91993	31149	17571	1.839	0.032958	0.96704	0.065917	0.28661	FALSE
ZG16B_15	ZG16B	1177.8/1244.4/598.64	808.58/1259.8/681.54	1177.8	808.58	-0.54204	169910	40352	1.8379	0.03304	0.96696	0.06608	0.28719	FALSE
MRP63_10	MRP63	748.34/608.27/611.88	895.1/346.43/170.93	611.88	346.43	-0.81889	9316.7	20867	1.8378	0.033048	0.96695	0.066097	0.28719	FALSE
INTS12_12	INTS12	993.85/719.52/291.23	359.04/431.54/485.57	719.52	431.54	-0.73621	129350	24566	1.8374	0.033075	0.96692	0.06615	0.28731	FALSE
SSX4_10	SSX4	423.09/498.82/483.91	352.07/166.62/248.23	483.91	248.23	-0.96025	1960.8	16475	1.8372	0.033087	0.96691	0.066175	0.28731	FALSE
DCAKD_2	DCAKD	736.56/1034.4/642.77	440.59/1046.5/445.29	736.56	445.29	-0.72478	48759	25152	1.8366	0.033134	0.96687	0.066268	0.28734	FALSE
MRPL28_9	MRPL28	963.05/445.89/227.98	402.8/214.57/219.92	445.89	219.92	-1.0164	157470	15172	1.8364	0.033147	0.96685	0.066295	0.28734	FALSE
MED26_2	MED26	513.69/699.78/312.56	276.49/270.91/190.53	513.69	270.91	-0.92057	37542	17497	1.8361	0.033172	0.96683	0.066345	0.28734	FALSE
ZNF764_10	ZNF764	655.93/1008.4/953.12	1049.3/600.56/621.66	953.12	621.66	-0.61572	45690	32606	1.8356	0.033209	0.96679	0.066418	0.28756	FALSE
EPN1_3	EPN1	647.77/706.06/544.22	374.95/268.51/497.55	647.77	374.95	-0.78717	7060.4	22100	1.8353	0.033231	0.96677	0.066461	0.28765	FALSE
ARGLU1_7	ARGLU1	696.69/860.37/587.61	413.74/273.31/651.06	696.69	413.74	-0.7504	19345	23781	1.8349	0.033259	0.96674	0.066519	0.28771	FALSE
GIGYF2_4	GIGYF2	364.2/118.42/139	31.826/28.769/0	139	28.769	-2.2335	25570	4690.7	1.8349	0.033262	0.96674	0.066524	0.28771	FALSE
SETD1A_5	SETD1A	494.66/595.71/707.48	500.26/334.44/223.19	595.71	334.44	-0.83097	11352	20312	1.8334	0.03337	0.96663	0.06674	0.28844	FALSE
RPL28_9	RPL28	219.25/310.42/83.839	32.82/67.128/164.4	219.25	67.128	-1.6928	13323	7422.7	1.8324	0.033445	0.96656	0.06689	0.28873	FALSE
hsa-mir-6886_12	hsa-mir-6886	205.66/202.76/289.76	59.674/0/72.945	205.66	59.674	-1.7681	3540.9	6959.5	1.8323	0.03345	0.96655	0.0669	0.28873	FALSE
ZNF263_3	ZNF263	114.15/312.21/193.42	47.739/189.4/53.348	193.42	53.348	-1.8389	10197	6542.5	1.831	0.033549	0.96645	0.067097	0.28946	FALSE
VPS72_2	VPS72	429.43/831.66/833.98	523.14/957.77/348.39	831.66	523.14	-0.66778	80897	28424	1.83	0.033626	0.96637	0.067251	0.28973	FALSE
IPO9_12	IPO9	310.75/571.49/333.89	140.23/41.955/192.7	333.89	140.23	-1.2456	28495	11338	1.8297	0.03365	0.96635	0.0673	0.28977	FALSE
WRNIP1_14	WRNIP1	742.9/586.74/228.72	328.2/323.65/329.88	586.74	328.2	-0.83619	76282	20004	1.8282	0.033762	0.96624	0.067524	0.2906	FALSE
DCPS_11	DCPS	410.41/571.49/375.81	198.91/92.301/194.88	410.41	194.88	-1.0706	13572	13956	1.8276	0.033801	0.9662	0.067603	0.29083	FALSE
ZNF232_4	ZNF232	421.28/451.27/163.27	202.89/45.551/354.92	421.28	202.89	-1.0504	33735	14329	1.8272	0.033836	0.96616	0.067671	0.29097	FALSE
EIF5A_3	EIF5A	444.83/283.5/386.84	178.03/196.59/126.29	386.84	178.03	-1.1153	7021	13149	1.8257	0.033948	0.96605	0.067897	0.29137	FALSE
FNDC3B_1	FNDC3B	302.6/475.49/414.05	202.89/197.79/114.32	414.05	197.79	-1.062	8098.5	14081	1.8255	0.033959	0.96604	0.067918	0.29137	FALSE
RTBDN_2	RTBDN	329.77/686.32/325.8	397.82/137.85/79.477	329.77	137.85	-1.2523	63571	11197	1.8253	0.033975	0.96602	0.067951	0.29137	FALSE
ZW10_12	ZW10	792.73/822.69/908.26	727.02/516.65/481.22	822.69	516.65	-0.67014	4109.7	28115	1.8252	0.033983	0.96602	0.067967	0.29137	FALSE
VPS35_2	VPS35	460.24/634.29/569.22	315.28/273.31/370.17	569.22	315.28	-0.85035	8056	19402	1.8234	0.03412	0.96588	0.06824	0.29224	FALSE
STX4_9	STX4	642.34/921.38/770	474.41/629.33/416.98	770	474.41	-0.69757	19607	26302	1.8226	0.034179	0.96582	0.068358	0.29256	FALSE
NonTargeting_Human_0137	NonTargeting_Human_0137	757.4/755.4/458.17	971.68/462.7/416.98	755.4	462.7	-0.70595	44175	25800	1.8223	0.034205	0.96579	0.068411	0.29256	FALSE
NCOR1_7	NCOR1	1352.6/1616.7/2045.2	1602.2/1187.9/980.94	1616.7	1187.9	-0.44426	126690	55514	1.8197	0.034403	0.9656	0.068805	0.29378	FALSE
DPY30_12	DPY30	440.3/384.88/253.72	69.619/177.41/510.61	384.88	177.41	-1.113	10137	13082	1.8187	0.034478	0.96552	0.068956	0.29427	FALSE
SSR2_5	SSR2	218.34/177.64/208.13	189.96/33.564/62.057	208.13	62.057	-1.7296	516.98	7043.7	1.8178	0.034546	0.96545	0.069092	0.29475	FALSE
ATXN7L3_9	ATXN7L3	48.017/206.35/192.68	267.54/53.942/48.993	192.68	53.942	-1.8177	10558	6517.5	1.8166	0.034642	0.96536	0.069284	0.29526	FALSE
SSX2_13	SSX2	348.8/759.89/274.32	152.17/103.09/301.58	348.8	152.17	-1.1914	87271	11848	1.8149	0.034767	0.96523	0.069535	0.29581	FALSE
SBK1_13	SBK1	811.75/615.45/424.34	334.17/456.71/352.75	615.45	352.75	-0.80126	37528	20989	1.8134	0.034885	0.96512	0.06977	0.2966	FALSE
MRPL9_12	MRPL9	197.5/43.063/244.9	56.69/0/145.89	197.5	56.69	-1.7828	13049	6681.6	1.8131	0.034907	0.96509	0.069813	0.29668	FALSE
ATP6V0D1_2	ATP6V0D1	403.16/471.01/651.59	221.79/351.22/241.7	471.01	241.7	-0.95965	18607	16033	1.8122	0.034975	0.96502	0.06995	0.29706	FALSE
BAGE2_5	BAGE2	611.53/421.66/294.17	666.36/204.98/95.808	421.66	204.98	-1.037	26152	14342	1.812	0.034992	0.96501	0.069984	0.2971	FALSE
DHRSX_1	DHRSX	378.7/327.46/411.84	124.32/173.81/177.46	378.7	173.81	-1.119	1861.8	12871	1.8112	0.035056	0.96494	0.070113	0.29754	FALSE
PRMT1_6	PRMT1	268.17/126.5/321.38	98.461/0/138.27	268.17	98.461	-1.4363	11451	9092	1.8096	0.035183	0.96482	0.070365	0.29824	FALSE
INSR_6	INSR	235.55/493.44/461.85	182/358.42/235.16	461.85	235.16	-0.97075	26104	15719	1.8095	0.035188	0.96481	0.070376	0.29824	FALSE
IL17RA_2	IL17RA	795.45/592.12/1063.4	497.28/601.75/370.17	795.45	497.28	-0.67662	56579	27177	1.8087	0.035252	0.96475	0.070505	0.29848	FALSE
C21orf59_9	C21orf59	385.95/33.195/134.58	190.96/0/28.307	134.58	28.307	-2.2099	36731	4540.7	1.8082	0.035287	0.96471	0.070574	0.29867	FALSE
ATP5I_2	ATP5I	253.67/503.3/360.36	161.12/287.69/25.041	360.36	161.12	-1.1564	15907	12243	1.8076	0.035334	0.96467	0.070669	0.29888	FALSE
DNAJC13_12	DNAJC13	619.69/532.91/592.02	384.89/335.64/162.22	592.02	335.64	-0.81688	2129.8	20185	1.8048	0.035556	0.96444	0.071112	0.2998	FALSE
MRPS21_12	MRPS21	165.79/219.8/222.1	69.619/65.929/206.86	219.8	69.619	-1.6446	1461.2	7441.7	1.8039	0.035622	0.96438	0.071244	0.30025	FALSE
SLAMF6_3	SLAMF6	218.34/556.24/566.28	327.21/258.92/308.11	556.24	308.11	-0.85017	57137	18956	1.8025	0.035734	0.96427	0.071467	0.30099	FALSE
TAF2_11	TAF2	769.17/590.33/636.88	396.83/238.54/371.26	636.88	371.26	-0.777	9833.9	21726	1.8022	0.035755	0.96425	0.071509	0.30106	FALSE
VPS33A_15	VPS33A	179.38/334.64/197.83	57.684/124.67/0	197.83	57.684	-1.7605	9528.3	6692.8	1.8013	0.035829	0.96417	0.071659	0.30158	FALSE
SPNS1_9	SPNS1	847.09/698.88/342.71	417.72/420.75/678.28	698.88	420.75	-0.73073	74412	23856	1.8008	0.035868	0.96413	0.071737	0.30162	FALSE
STX10_14	STX10	520.03/420.77/405.22	69.619/368.01/205.77	420.77	205.77	-1.0284	5047.5	14311	1.7998	0.035943	0.96406	0.071886	0.30212	FALSE
NonTargeting_Human_0215	NonTargeting_Human_0215	511.88/545.47/448.61	430.64/255.33/274.36	511.88	274.36	-0.8973	2565.4	17434	1.7995	0.035971	0.96403	0.071942	0.30226	FALSE
EBP_14	EBP	1073.6/690.81/1077.4	671.33/728.82/1076.7	1073.6	728.82	-0.55816	73264	36758	1.7982	0.036072	0.96393	0.072143	0.30289	FALSE
hsa-mir-3680-1_6	hsa-mir-3680-1	153.11/144.44/81.633	0/86.307/32.662	144.44	32.662	-2.1113	2010.1	4875.7	1.7977	0.036112	0.96389	0.072223	0.30312	FALSE
NCAPG2_8	NCAPG2	329.77/469.21/401.55	191.95/145.04/226.45	401.55	191.95	-1.0609	4864.9	13653	1.7973	0.036141	0.96386	0.072282	0.30326	FALSE
SCYL1_8	SCYL1	290.82/314/98.548	114.37/63.532/165.49	290.82	114.37	-1.3387	18753	9865.6	1.7967	0.036188	0.96381	0.072376	0.30334	FALSE
PTPMT1_9	PTPMT1	578.92/591.22/632.47	336.16/98.295/400.65	591.22	336.16	-0.81271	926.35	20158	1.7967	0.036192	0.96381	0.072383	0.30334	FALSE
TRA2B_15	TRA2B	138.61/40.372/117.67	0/22.776/102.34	117.67	22.776	-2.3194	3206.8	3966.2	1.7966	0.036199	0.9638	0.072399	0.30334	FALSE
SCARB1_15	SCARB1	301.69/440.5/542.75	133.27/453.11/221.01	440.5	221.01	-0.99179	14862	14987	1.7948	0.036341	0.96366	0.072681	0.30427	FALSE
ANKRD36_6	ANKRD36	610.63/628.01/245.63	332.18/359.61/351.66	610.63	351.66	-0.79438	66761	20824	1.7947	0.036348	0.96365	0.072695	0.30427	FALSE
CDIPT_1	CDIPT	712.1/1281.1/792.79	314.28/497.47/545.45	792.79	497.47	-0.67127	122500	27086	1.7945	0.03637	0.96363	0.07274	0.30435	FALSE
EIF6_6	EIF6	287.19/130.09/248.58	87.521/117.47/35.928	248.58	87.521	-1.4954	7765.4	8423.2	1.7942	0.036387	0.96361	0.072775	0.30439	FALSE
GAGE1_15	GAGE1	154.02/244.92/268.43	85.532/0/172.02	244.92	85.532	-1.5069	4408.4	8298.6	1.7912	0.036629	0.96337	0.073259	0.30589	FALSE
THOC6_13	THOC6	910.5/436.91/335.36	197.92/254.13/218.83	436.91	218.83	-0.99424	117300	14865	1.7907	0.036667	0.96333	0.073334	0.30602	FALSE
METTL17_2	METTL17	404.06/612.76/569.22	401.8/320.06/253.67	569.22	320.06	-0.8287	14586	19402	1.7891	0.036801	0.9632	0.073603	0.30691	FALSE
MORC3_12	MORC3	159.45/549.96/432.43	318.26/215.77/168.75	432.43	215.77	-0.99966	44165	14711	1.7885	0.036846	0.96315	0.073692	0.30709	FALSE
SEZ6L2_8	SEZ6L2	806.32/711.44/1060.5	267.54/509.45/826.34	806.32	509.45	-0.66136	36803	27552	1.7885	0.036849	0.96315	0.073697	0.30709	FALSE
FNDC3B_12	FNDC3B	563.52/331.05/419.2	124.32/206.18/336.42	419.2	206.18	-1.0202	14299	14258	1.7866	0.036997	0.963	0.073995	0.30791	FALSE
OTC_10	OTC	352.42/270.94/244.9	102.44/75.519/243.87	270.94	102.44	-1.3945	3658.9	9186.7	1.7853	0.037109	0.96289	0.074217	0.30855	FALSE
UVRAG_2	UVRAG	186.63/0.89715/174.3	46.744/26.372/46.815	174.3	46.744	-1.8764	15110	5891.4	1.7851	0.037126	0.96287	0.074252	0.30855	FALSE
THOC6_11	THOC6	770.98/788.6/577.31	481.37/417.15/654.32	770.98	481.37	-0.67844	18909	26336	1.7847	0.037159	0.96284	0.074317	0.30855	FALSE
SNX1_14	SNX1	472.92/304.14/526.57	246.65/169.02/451.82	472.92	246.65	-0.93633	15683	16098	1.7845	0.037173	0.96283	0.074347	0.30855	FALSE
DNLZ_7	DNLZ	276.32/50.241/195.62	95.478/0/57.702	195.62	57.702	-1.744	13824	6617.7	1.7841	0.037206	0.96279	0.074411	0.30855	FALSE
GFER_1	GFER	222.87/342.71/117.67	66.636/133.06/72.945	222.87	72.945	-1.5981	12715	7546.3	1.7838	0.037227	0.96277	0.074454	0.30855	FALSE
CEP120_14	CEP120	275.42/224.29/328.74	97.467/105.49/384.32	275.42	105.49	-1.3762	2728.6	9339.5	1.7837	0.037238	0.96276	0.074476	0.30855	FALSE
EIF3C_1	EIF3C	337.93/195.58/242.69	102.44/82.711/84.921	242.69	84.921	-1.504	5644.8	8222.4	1.7822	0.037355	0.96264	0.07471	0.30937	FALSE
CAND1_14	CAND1	525.47/619.93/1053.9	243.67/360.81/479.04	619.93	360.81	-0.7792	98614	21143	1.7821	0.037363	0.96264	0.074726	0.30937	FALSE
FAM57B_15	FAM57B	374.17/803.85/525.83	281.46/431.54/287.42	525.83	287.42	-0.86916	50148	17913	1.7818	0.03739	0.96261	0.074781	0.30948	FALSE
NonTargeting_Human_0554	NonTargeting_Human_0554	256.39/204.55/235.34	80.559/385.99/64.235	235.34	80.559	-1.5349	695.52	7971.5	1.781	0.037458	0.96254	0.074917	0.30985	FALSE
SETD1A_11	SETD1A	211.09/322.08/425.81	372.96/121.07/137.18	322.08	137.18	-1.2253	11540	10934	1.7803	0.037513	0.96249	0.075026	0.30998	FALSE
HYOU1_14	HYOU1	124.12/149.82/162.53	35.804/0/92.542	149.82	35.804	-2.0349	411.12	5058.8	1.78	0.037535	0.96246	0.075071	0.30998	FALSE
SLC35B2_3	SLC35B2	702.13/656.72/1109	426.67/263.72/550.89	702.13	426.67	-0.71731	83815	23968	1.7793	0.037592	0.96241	0.075185	0.31012	FALSE
NCBP1_15	NCBP1	374.17/238.64/103.7	70.614/239.74/82.743	238.64	82.743	-1.5168	18289	8084.3	1.7787	0.037642	0.96236	0.075284	0.31042	FALSE
GTF2H2_3	GTF2H2	355.14/412.69/155.91	212.84/160.63/39.194	355.14	160.63	-1.1398	21502	12065	1.778	0.0377	0.9623	0.075401	0.31069	FALSE
RBBP5_2	RBBP5	298.07/466.52/475.09	242.67/461.51/150.24	466.52	242.67	-0.94009	14225	15879	1.7776	0.037731	0.96227	0.075462	0.31084	FALSE
NonTargeting_Human_0582	NonTargeting_Human_0582	212.9/369.63/451.55	171.06/350.02/55.525	369.63	171.06	-1.107	15637	12560	1.7774	0.037751	0.96225	0.075503	0.3109	FALSE
ATP13A1_13	ATP13A1	402.25/267.35/344.92	392.85/105.49/153.51	344.92	153.51	-1.1627	4651.9	11715	1.7768	0.037802	0.9622	0.075605	0.31101	FALSE
INO80D_5	INO80D	618.78/736.56/408.9	236.71/360.81/412.63	618.78	360.81	-0.77651	28961	21104	1.7759	0.037876	0.96212	0.075753	0.31151	FALSE
URI1_1	URI1	374.17/329.26/93.4	262.56/142.65/124.11	329.26	142.65	-1.2011	28823	11179	1.7756	0.037901	0.9621	0.075803	0.31161	FALSE
SREBF2_6	SREBF2	537.24/357.96/761.91	351.08/196.59/297.22	537.24	297.22	-0.85187	41307	18305	1.7745	0.037992	0.96201	0.075984	0.31194	FALSE
COMMD3_12	COMMD3	653.21/767.07/600.85	385.89/388.38/403.92	653.21	388.38	-0.74856	7852.8	22287	1.774	0.038032	0.96197	0.076063	0.31216	FALSE
CPSF2_8	CPSF2	410.41/318.49/196.36	113.38/135.45/199.24	318.49	135.45	-1.2273	11682	10811	1.7729	0.038122	0.96188	0.076243	0.31268	FALSE
NCBP1_2	NCBP1	320.72/377.7/513.33	497.28/58.737/177.46	377.7	177.46	-1.0854	10821	12837	1.7723	0.038172	0.96183	0.076345	0.31283	FALSE
SBK1_5	SBK1	830.78/969.82/796.47	398.82/532.23/637.99	830.78	532.23	-0.64144	10255	28393	1.7718	0.038216	0.96178	0.076432	0.31283	FALSE
PIAS1_13	PIAS1	621.5/945.6/501.56	200.9/427.94/363.63	621.5	363.63	-0.77162	59713	21197	1.7713	0.038259	0.96174	0.076519	0.31308	FALSE
DNASE2_12	DNASE2	459.33/442.3/369.92	254.61/163.03/225.37	442.3	225.37	-0.96962	2764.1	15049	1.7701	0.038351	0.96165	0.076702	0.31362	FALSE
NonTargeting_Human_0271	NonTargeting_Human_0271	587.98/298.75/642.77	407.77/329.65/337.5	587.98	337.5	-0.79904	43327	20046	1.7693	0.038425	0.96158	0.07685	0.31382	FALSE
GPN3_6	GPN3	509.16/452.17/550.1	276.49/503.46/168.75	509.16	276.49	-0.87852	2462.3	17341	1.7675	0.038573	0.96143	0.077146	0.31459	FALSE
INTS1_11	INTS1	76.102/37.681/114.73	11.935/59.936/0	76.102	11.935	-2.5755	1484.1	2557.2	1.7669	0.03862	0.96138	0.07724	0.31462	FALSE
MGEA5_8	MGEA5	448.46/753.61/1297.3	470.43/304.47/805.66	753.61	470.43	-0.6787	194360	25738	1.7652	0.038769	0.96123	0.077538	0.31533	FALSE
INO80D_3	INO80D	394.1/97.79/226.51	76.581/53.942/215.57	226.51	76.581	-1.5522	22327	7670.5	1.7649	0.038794	0.96121	0.077588	0.31534	FALSE
TBX6_15	TBX6	751.96/533.81/624.38	366.99/462.7/351.66	624.38	366.99	-0.76506	12240	21296	1.7639	0.038878	0.96112	0.077755	0.31591	FALSE
NonTargeting_Human_0509	NonTargeting_Human_0509	683.11/318.49/457.44	237.7/520.24/225.37	457.44	237.7	-0.94153	35116	15568	1.7625	0.03899	0.96101	0.077979	0.31672	FALSE
RANBP1_15	RANBP1	564.42/758.99/447.88	455.51/262.52/320.09	564.42	320.09	-0.81637	25720	19237	1.7619	0.039043	0.96096	0.078085	0.31683	FALSE
DNAJC13_6	DNAJC13	353.33/273.63/268.43	106.42/143.85/34.839	273.63	106.42	-1.3543	3189.4	9278.6	1.7609	0.039125	0.96087	0.07825	0.31717	FALSE
BRD2_10	BRD2	734.75/528.42/542.75	303.34/455.51/214.48	542.75	303.34	-0.83725	18534	18494	1.7608	0.039133	0.96087	0.078266	0.31717	FALSE
TAF2_10	TAF2	533.62/507.79/637.62	296.38/479.49/287.42	533.62	296.38	-0.84621	5741.6	18180	1.7599	0.03921	0.96079	0.078421	0.31766	FALSE
MRPS31_6	MRPS31	493.76/488.05/467.73	357.05/261.32/132.82	488.05	261.32	-0.89866	222.68	16617	1.7597	0.039226	0.96077	0.078453	0.31769	FALSE
NR2C2AP_13	NR2C2AP	183.01/225.19/76.485	13.924/52.743/212.3	183.01	52.743	-1.7756	6563	6187.9	1.7593	0.03926	0.96074	0.07852	0.31786	FALSE
SPRN_14	SPRN	317.09/527.53/531.72	339.14/204.98/291.78	527.53	291.78	-0.85217	22150	17971	1.759	0.039285	0.96071	0.078571	0.31796	FALSE
ATP6V0D1_7	ATP6V0D1	607/705.16/447.14	354.06/409.96/288.51	607	354.06	-0.776	17595	20699	1.7582	0.039355	0.96064	0.07871	0.31831	FALSE
BRD2_4	BRD2	607.91/1146.6/548.63	345.11/354.82/468.15	607.91	354.82	-0.77508	146830	20730	1.7579	0.039379	0.96062	0.078758	0.31833	FALSE
RCC1_10	RCC1	411.31/147.13/391.25	188.97/359.61/119.76	391.25	188.97	-1.046	29998	13301	1.7579	0.039384	0.96062	0.078768	0.31833	FALSE
XAGE1A_15	XAGE1A	639.62/802.06/919.29	511.2/612.54/249.32	802.06	511.2	-0.64878	20065	27405	1.757	0.039463	0.96054	0.078926	0.31886	FALSE
MED8_3	MED8	0/36.783/77.22	37.793/4.7949/0	36.783	4.7949	-2.7049	1494.1	1229.7	1.756	0.039544	0.96046	0.079088	0.3192	FALSE
SSR2_14	SSR2	1168.7/1259.6/1290.7	895.1/798.34/974.41	1259.6	895.1	-0.49238	4614.1	43177	1.7542	0.039699	0.9603	0.079399	0.31998	FALSE
NAA10_13	NAA10	218.34/261.97/357.42	353.07/99.493/44.638	261.97	99.493	-1.3878	5507.1	8880.3	1.7538	0.03973	0.96027	0.079461	0.32001	FALSE
C9orf41_11	C9orf41	156.73/137.26/166.21	34.81/149.84/40.283	156.73	40.283	-1.9339	234.4	5293.7	1.7536	0.039749	0.96025	0.079498	0.32001	FALSE
HIST1H2BB_14	HIST1H2BB	0/63.698/5.8835	0/0/0	5.8835	0	-2.7831	1688.6	194.15	1.7528	0.039816	0.96018	0.079632	0.32023	FALSE
NonTargeting_Human_0852	NonTargeting_Human_0852	90.597/0/5.8835	0/0/0	5.8835	0	-2.7831	3605.5	194.15	1.7528	0.039816	0.96018	0.079632	0.32023	FALSE
NHLRC2_13	NHLRC2	275.42/158.8/276.52	108.41/0/198.15	275.42	108.41	-1.3371	6800.7	9339.5	1.7521	0.039882	0.96012	0.079764	0.32057	FALSE
ARPC4_1	ARPC4	493.76/648.64/387.57	514.19/53.942/266.74	493.76	266.74	-0.8859	17632	16813	1.7516	0.039922	0.96008	0.079843	0.32057	FALSE
TOMM22_14	TOMM22	195.69/297.86/548.63	360.03/123.47/96.897	297.86	123.47	-1.2637	36663	10106	1.7515	0.039933	0.96007	0.079867	0.32057	FALSE
ZNF232_11	ZNF232	969.39/543.68/725.14	371.97/1070.5/449.64	725.14	449.64	-0.68825	46295	24759	1.7508	0.039986	0.96001	0.079972	0.32086	FALSE
CTDP1_3	CTDP1	531.81/312.21/469.21	221.79/248.13/345.13	469.21	248.13	-0.91637	14283	15971	1.7504	0.040021	0.95998	0.080042	0.32097	FALSE
UBA2_7	UBA2	624.22/401.93/553.04	204.88/312.86/385.41	553.04	312.86	-0.81986	13951	18847	1.7498	0.040074	0.95993	0.080149	0.32116	FALSE
MGEA5_14	MGEA5	341.55/531.12/434.64	223.78/64.731/222.1	434.64	222.1	-0.96545	8986.4	14787	1.7498	0.040076	0.95992	0.080151	0.32116	FALSE
GAPDH_14	GAPDH	284.48/61.007/167.68	97.467/0/45.726	167.68	45.726	-1.852	12510	5666.1	1.7487	0.04017	0.95983	0.08034	0.32175	FALSE
MBTPS1_11	MBTPS1	183.91/388.47/219.89	136.25/21.577/74.033	219.89	74.033	-1.5578	14856	7444.8	1.7475	0.040276	0.95972	0.080553	0.32229	FALSE
RPUSD4_7	RPUSD4	664.99/480.87/647.18	657.4/338.04/387.59	647.18	387.59	-0.73816	13987	22079	1.7471	0.04031	0.95969	0.08062	0.32232	FALSE
AHSP_14	AHSP	526.37/642.36/222.1	559.94/292.49/166.57	526.37	292.49	-0.84553	53017	17932	1.7471	0.040313	0.95969	0.080626	0.32232	FALSE
TMEM258_9	TMEM258	179.38/35.886/339.77	51.717/0/173.11	179.38	51.717	-1.7747	23158	6064.5	1.7464	0.040371	0.95963	0.080742	0.32268	FALSE
UBE2G2_3	UBE2G2	274.51/480.87/112.52	108.41/0/177.46	274.51	108.41	-1.3324	34413	9308.6	1.7456	0.04044	0.95956	0.08088	0.32302	FALSE
RTBDN_12	RTBDN	106/654.92/414.78	207.86/166.62/569.4	414.78	207.86	-0.99327	76507	14106	1.7448	0.040508	0.95949	0.081016	0.32345	FALSE
MGAT1_10	MGAT1	197.5/433.33/439.79	241.68/221.76/108.87	433.33	221.76	-0.96327	27827	14742	1.7445	0.04054	0.95946	0.08108	0.3235	FALSE
SORT1_3	SORT1	661.36/427.94/578.05	329.2/333.24/405.01	578.05	333.24	-0.79279	14736	19705	1.7442	0.040566	0.95943	0.081132	0.32353	FALSE
SNAI1_2	SNAI1	510.97/472.8/316.24	221.79/251.73/326.62	472.8	251.73	-0.90668	12985	16094	1.7436	0.04061	0.95939	0.081221	0.32353	FALSE
SPINT1_15	SPINT1	986.61/796.67/885.46	716.08/582.58/538.92	885.46	582.58	-0.60314	9056.9	30276	1.7407	0.040867	0.95913	0.081733	0.32489	FALSE
ATP6V1H_3	ATP6V1H	386.85/342.71/330.94	99.456/155.83/204.68	342.71	155.83	-1.132	1043.3	11640	1.7403	0.040906	0.95909	0.081811	0.32503	FALSE
INO80D_13	INO80D	730.22/616.35/898.7	672.32/455.51/411.54	730.22	455.51	-0.67965	20676	24934	1.7397	0.040955	0.95905	0.08191	0.32521	FALSE
SNX1_10	SNX1	628.75/375.91/733.96	458.49/356.02/374.52	628.75	374.52	-0.74588	37499	21446	1.7361	0.041276	0.95872	0.082551	0.3268	FALSE
NonTargeting_Human_0757	NonTargeting_Human_0757	708.47/830.77/423.61	438.6/396.77/661.94	708.47	438.6	-0.69055	48052	24186	1.7353	0.041341	0.95866	0.082683	0.32722	FALSE
HAPLN1_7	HAPLN1	250.05/32.298/230.93	80.559/89.904/81.654	230.93	81.654	-1.4885	19909	7821	1.7348	0.041392	0.95861	0.082783	0.32749	FALSE
SYP_1	SYP	605.19/965.34/507.45	441.58/356.02/221.01	605.19	356.02	-0.76378	69630	20637	1.7346	0.041402	0.9586	0.082804	0.32749	FALSE
DARS_7	DARS	173.95/239.54/167.68	49.728/177.41/0	173.95	49.728	-1.7861	2170.9	5879.5	1.7341	0.041449	0.95855	0.082898	0.32765	FALSE
GPN2_8	GPN2	474.73/474.59/742.05	494.3/164.22/254.76	474.73	254.76	-0.89535	35730	16161	1.7314	0.041694	0.95831	0.083388	0.32908	FALSE
PIK3R4_5	PIK3R4	146.77/72.67/153.71	49.728/0/37.017	146.77	37.017	-1.9586	2769.3	4954.8	1.7311	0.041718	0.95828	0.083436	0.32908	FALSE
hsa-mir-638_10	hsa-mir-638	154.92/182.12/113.99	139.24/40.756/1.0887	154.92	40.756	-1.9008	1207.6	5232.1	1.73	0.041813	0.95819	0.083626	0.32924	FALSE
ATP5O_9	ATP5O	132.27/399.23/233.87	71.608/83.91/236.25	233.87	83.91	-1.4678	18834	7921.4	1.7292	0.041888	0.95811	0.083776	0.32945	FALSE
VPS72_7	VPS72	834.4/498.82/652.33	369.98/394.38/473.6	652.33	394.38	-0.72458	28358	22256	1.7291	0.041893	0.95811	0.083787	0.32945	FALSE
SREBF2_9	SREBF2	916.85/544.57/487.59	770.78/304.47/309.2	544.57	309.2	-0.81458	70917	18556	1.7282	0.041973	0.95803	0.083947	0.32972	FALSE
MEF2BNB_4	MEF2BNB	467.48/363.35/292.7	355.06/57.538/172.02	363.35	172.02	-1.0744	7917.5	12346	1.7277	0.042022	0.95798	0.084045	0.32988	FALSE
ZNF263_14	ZNF263	627.84/432.43/464.79	247.65/415.95/221.01	464.79	247.65	-0.9056	13816	15820	1.7276	0.042029	0.95797	0.084057	0.32988	FALSE
MYOZ3_6	MYOZ3	944.93/720.42/641.3	445.56/449.52/999.45	720.42	449.52	-0.67925	28334	24597	1.7273	0.042055	0.95794	0.08411	0.32991	FALSE
ROR1_2	ROR1	383.23/732.08/807.5	685.25/459.11/442.02	732.08	459.11	-0.672	63693	24998	1.7265	0.042127	0.95787	0.084255	0.33023	FALSE
SOCS1_9	SOCS1	1037.3/1230.9/764.11	952.79/712.04/495.37	1037.3	712.04	-0.54223	56059	35509	1.7263	0.042145	0.95786	0.084289	0.33026	FALSE
ZFP3_14	ZFP3	361.48/229.67/608.94	171.06/364.41/140.45	361.48	171.06	-1.075	39304	12282	1.7241	0.042347	0.95765	0.084694	0.33152	FALSE
DCPS_12	DCPS	633.28/486.26/807.5	469.43/379.99/145.89	633.28	379.99	-0.73535	25985	21602	1.7234	0.042409	0.95759	0.084817	0.3319	FALSE
TAF2_13	TAF2	536.34/435.12/349.33	225.77/451.92/102.34	435.12	225.77	-0.94353	8802.4	14803	1.7226	0.042485	0.95752	0.08497	0.33239	FALSE
YPEL1_15	YPEL1	356.05/95.098/216.95	72.603/74.32/123.03	216.95	74.32	-1.5329	17098	7344.5	1.7214	0.042588	0.95741	0.085177	0.33288	FALSE
C12orf43_6	C12orf43	426.71/174.05/389.04	388.87/184.6/191.62	389.04	191.62	-1.0179	23821	13225	1.7205	0.042668	0.95733	0.085336	0.33339	FALSE
BRD2_6	BRD2	394.1/444.09/368.45	295.38/195.39/155.69	394.1	195.39	-1.0085	1578.5	13398	1.7202	0.0427	0.9573	0.085399	0.33353	FALSE
CDC23_11	CDC23	242.8/91.51/281.67	91.5/80.314/90.364	242.8	90.364	-1.416	12200	8226.2	1.7185	0.042855	0.95714	0.08571	0.33427	FALSE
SSR2_9	SSR2	342.46/895.36/692.04	345.11/427.94/553.07	692.04	427.94	-0.69216	81773	23621	1.7184	0.042861	0.95714	0.085722	0.33427	FALSE
MPDU1_13	MPDU1	354.24/352.58/440.52	113.38/332.04/166.57	354.24	166.57	-1.084	3724.1	12034	1.7172	0.042974	0.95703	0.085948	0.33482	FALSE
EXOC4_8	EXOC4	353.33/325.67/277.26	183.99/146.24/57.702	325.67	146.24	-1.1496	1554.4	11057	1.7165	0.043036	0.95696	0.086073	0.33488	FALSE
ORMDL3_7	ORMDL3	558.99/613.65/413.31	367.99/312.86/322.26	558.99	322.26	-0.79269	12105	19051	1.7154	0.04314	0.95686	0.086281	0.33558	FALSE
PPIAL4A_6	PPIAL4A	175.76/425.25/454.5	259.58/219.36/195.97	425.25	219.36	-0.95181	31551	14465	1.714	0.043266	0.95673	0.086532	0.33603	FALSE
TCERG1_4	TCERG1	391.38/351.68/298.59	165.1/327.25/80.566	351.68	165.1	-1.0864	2197.7	11946	1.7138	0.043282	0.95672	0.086564	0.33604	FALSE
NLRP8_8	NLRP8	385.04/566.1/478.77	277.48/260.12/174.2	478.77	260.12	-0.87761	8206.4	16299	1.7135	0.043307	0.95669	0.086614	0.33606	FALSE
SNAPC3_14	SNAPC3	477.45/515.86/397.13	511.2/135.45/259.12	477.45	259.12	-0.87921	3963.2	16254	1.7135	0.043312	0.95669	0.086625	0.33606	FALSE
BRD2_13	BRD2	2162.6/1513.5/1574.6	1176.6/1106.4/1290.1	1574.6	1176.6	-0.42006	174740	54058	1.7118	0.043469	0.95653	0.086938	0.33706	FALSE
ZNF646_11	ZNF646	806.32/752.71/714.84	478.38/598.16/407.18	752.71	478.38	-0.65284	2153.9	25707	1.711	0.043542	0.95646	0.087083	0.33734	FALSE
THOC6_5	THOC6	552.64/422.56/505.24	461.48/209.78/280.89	505.24	280.89	-0.84469	4541.7	17207	1.7109	0.043548	0.95645	0.087095	0.33734	FALSE
FNDC3B_7	FNDC3B	703.04/672.87/489.06	126.31/451.92/413.72	672.87	413.72	-0.70034	17347	22962	1.7102	0.04361	0.95639	0.087221	0.33735	FALSE
WDR18_14	WDR18	558.08/671.07/293.44	294.39/438.73/322.26	558.08	322.26	-0.79035	41402	19020	1.7102	0.043616	0.95638	0.087232	0.33735	FALSE
GYG2_7	GYG2	441.21/677.35/211.07	178.03/348.83/231.9	441.21	231.9	-0.92503	54364	15012	1.71	0.043634	0.95637	0.087267	0.33738	FALSE
EXT1_6	EXT1	111.43/0/120.61	61.663/2.3974/23.952	111.43	23.952	-2.1719	6251	3754.7	1.7092	0.043709	0.95629	0.087419	0.33755	FALSE
ROR1_5	ROR1	360.58/235.05/133.85	234.72/86.307/46.815	235.05	86.307	-1.4349	12999	7961.9	1.709	0.043724	0.95628	0.087447	0.33755	FALSE
ALG8_14	ALG8	278.13/155.21/440.52	38.788/209.78/114.32	278.13	114.32	-1.2754	20741	9432.3	1.7079	0.043824	0.95618	0.087648	0.33799	FALSE
hsa-mir-6511a-4_2	hsa-mir-6511a-4	642.34/664.79/542.01	187.97/389.58/554.16	642.34	389.58	-0.71995	5284.5	21913	1.7075	0.043863	0.95614	0.087726	0.33805	FALSE
ARPC4_8	ARPC4	674.95/534.7/543.48	311.3/481.88/160.04	543.48	311.3	-0.80197	8680.4	18519	1.7065	0.043954	0.95605	0.087908	0.33818	FALSE
DNAJC18_10	DNAJC18	327.96/580.46/582.46	712.1/340.43/333.15	580.46	340.43	-0.76807	31879	19788	1.7065	0.043959	0.95604	0.087917	0.33818	FALSE
GAGE1_9	GAGE1	194.78/304.14/279.46	115.37/56.34/211.21	279.46	115.37	-1.2691	3889.6	9477.7	1.7062	0.043982	0.95602	0.087965	0.33825	FALSE
POLR3H_14	POLR3H	522.75/475.49/258.14	258.59/334.44/226.45	475.49	258.59	-0.87624	24738	16187	1.7058	0.04402	0.95598	0.088039	0.33843	FALSE
NOTCH2NL_12	NOTCH2NL	322.53/77.155/241.22	90.505/381.19/87.098	241.22	90.505	-1.4044	16764	8172.3	1.705	0.044093	0.95591	0.088187	0.33867	FALSE
ZNHIT1_12	ZNHIT1	241.9/225.19/216.22	109.4/53.942/80.566	225.19	80.566	-1.4715	179.82	7625.3	1.7049	0.044106	0.95589	0.088212	0.33867	FALSE
PRPF38B_5	PRPF38B	267.26/359.76/538.34	172.06/152.24/202.5	359.76	172.06	-1.0598	20223	12223	1.7036	0.044231	0.95577	0.088462	0.33922	FALSE
C9orf41_7	C9orf41	526.37/388.47/615.56	296.38/665.29/298.31	526.37	298.31	-0.81718	13486	17932	1.7035	0.044234	0.95577	0.088468	0.33922	FALSE
CCDC115_14	CCDC115	331.59/265.56/116.2	106.42/155.83/70.767	265.56	106.42	-1.3112	13334	9002.9	1.7028	0.044299	0.9557	0.088598	0.33949	FALSE
RBBP5_13	RBBP5	487.41/403.72/258.14	327.21/136.65/204.68	403.72	204.68	-0.97652	14100	13727	1.7017	0.044406	0.95559	0.088812	0.34	FALSE
HNRNPA2B1_8	HNRNPA2B1	496.47/676.45/555.25	321.24/734.81/279.8	555.25	321.24	-0.78759	9072.5	18923	1.7014	0.044432	0.95557	0.088865	0.34	FALSE
GSK3B_11	GSK3B	483.79/659.41/142.67	265.55/406.36/221.01	483.79	265.55	-0.86297	73601	16471	1.7013	0.04444	0.95556	0.08888	0.34	FALSE
RICTOR_7	RICTOR	151.3/97.79/155.18	26.853/40.756/112.14	151.3	40.756	-1.8668	1439.1	5108.8	1.6995	0.04461	0.95539	0.089221	0.34072	FALSE
NonTargeting_Human_0995	NonTargeting_Human_0995	411.31/555.34/319.91	210.85/158.23/353.84	411.31	210.85	-0.96072	14549	13988	1.6976	0.044796	0.9552	0.089592	0.34192	FALSE
SREBF1_11	SREBF1	902.35/445.89/857.51	566.9/807.93/487.75	857.51	566.9	-0.59621	85724	29314	1.6974	0.044811	0.95519	0.089623	0.34193	FALSE
GPN3_12	GPN3	239.18/234.16/275.79	146.2/89.904/50.081	239.18	89.904	-1.4017	682.72	8102.5	1.6969	0.04486	0.95514	0.089721	0.34205	FALSE
SMNDC1_13	SMNDC1	90.597/342.71/284.61	293.4/9.5897/119.76	284.61	119.76	-1.2419	20509	9653.6	1.6966	0.044888	0.95511	0.089777	0.34205	FALSE
ZNRF3_13	ZNRF3	436.68/394.75/609.67	213.83/230.15/571.58	436.68	230.15	-0.92103	15842	14856	1.6961	0.044931	0.95507	0.089863	0.3421	FALSE
SETD1A_7	SETD1A	683.11/177.64/706.75	357.05/424.34/654.32	683.11	424.34	-0.68558	128030	23314	1.6947	0.045064	0.95494	0.090128	0.343	FALSE
SLX4_10	SLX4	963.96/1082.9/610.41	561.93/734.81/656.5	963.96	656.5	-0.55347	69568	32980	1.693	0.045227	0.95477	0.090454	0.34377	FALSE
ALDH3A2_12	ALDH3A2	180.29/184.81/124.29	55.695/0/193.79	180.29	55.695	-1.677	1578.3	6095.4	1.6926	0.045268	0.95473	0.090536	0.34377	FALSE
RBM3_11	RBM3	622.4/357.96/575.11	338.15/600.56/100.16	575.11	338.15	-0.76441	24694	19604	1.6926	0.045269	0.95473	0.090537	0.34377	FALSE
C2CD4A_15	C2CD4A	422.18/460.24/335.36	219.8/116.28/524.77	422.18	219.8	-0.93856	4493.7	14360	1.691	0.045415	0.95459	0.09083	0.34471	FALSE
NonTargeting_Human_0609	NonTargeting_Human_0609	743.81/527.53/709.69	446.56/384.79/673.92	709.69	446.56	-0.66715	17174	24228	1.6905	0.045463	0.95454	0.090925	0.34496	FALSE
GNB1L_2	GNB1L	648.68/651.33/453.03	423.68/243.34/397.38	648.68	397.38	-0.70556	19143	22131	1.6893	0.045584	0.95442	0.091169	0.34578	FALSE
ZNF263_4	ZNF263	520.03/785.01/743.52	474.41/274.51/776.26	743.52	474.41	-0.64716	25835	25391	1.6889	0.04562	0.95438	0.09124	0.34594	FALSE
COX5B_4	COX5B	145.86/586.74/414.78	111.39/214.57/387.59	414.78	214.57	-0.94768	50944	14106	1.6881	0.045696	0.9543	0.091393	0.34641	FALSE
MCM3_1	MCM3	170.32/164.18/163.27	47.739/57.538/0	164.18	47.739	-1.7609	19.291	5547	1.6864	0.04586	0.95414	0.091719	0.34712	FALSE
HTRA2_6	HTRA2	308.03/157.9/120.61	23.869/216.97/44.638	157.9	44.638	-1.7998	11965	5333.4	1.6864	0.045861	0.95414	0.091722	0.34712	FALSE
MTA2_5	MTA2	71.572/311.31/219.16	188.97/73.122/78.388	219.16	78.388	-1.4715	15137	7419.7	1.6862	0.04588	0.95412	0.09176	0.34712	FALSE
GIGYF2_6	GIGYF2	273.6/279.91/362.57	273.5/109.08/117.58	279.91	117.58	-1.2442	3435.8	9493	1.6859	0.045908	0.95409	0.091817	0.34712	FALSE
ARPC3_4	ARPC3	203.84/211.73/524.36	165.1/7.1923/74.033	211.73	74.033	-1.5034	48901	7166.4	1.6848	0.046011	0.95399	0.092021	0.34712	FALSE
FUNDC2_3	FUNDC2	770.08/627.11/724.4	878.2/376.4/459.44	724.4	459.44	-0.65576	5775.8	24734	1.6848	0.046018	0.95398	0.092035	0.34712	FALSE
NAA38_5	NAA38	31.709/140.85/156.65	36.799/34.763/209.04	140.85	36.799	-1.908	6080.9	4753.8	1.6845	0.04604	0.95396	0.09208	0.34712	FALSE
EXOC4_3	EXOC4	392.29/250.31/552.31	207.86/196.59/198.15	392.29	198.15	-0.98174	22883	13336	1.6845	0.046044	0.95396	0.092089	0.34712	FALSE
USO1_15	USO1	288.1/449.47/175.03	27.848/123.47/185.08	288.1	123.47	-1.2158	19413	9772.7	1.6827	0.046221	0.95378	0.092441	0.34822	FALSE
UVRAG_13	UVRAG	181.19/619.93/333.89	460.48/106.69/155.69	333.89	155.69	-1.0958	52569	11338	1.6819	0.046291	0.95371	0.092582	0.34854	FALSE
VPS13C_3	VPS13C	242.8/264.66/155.91	93.489/192.99/30.484	242.8	93.489	-1.3675	4013.8	8226.2	1.6817	0.046313	0.95369	0.092627	0.3486	FALSE
hsa-mir-6886_6	hsa-mir-6886	992.95/783.22/461.85	508.22/991.34/454	783.22	508.22	-0.62296	73632	26757	1.6812	0.046365	0.95364	0.092729	0.34888	FALSE
ROR1_14	ROR1	264.54/322.98/230.19	215.82/43.154/107.78	264.54	107.78	-1.2875	2297.2	8968.3	1.6804	0.046443	0.95356	0.092886	0.34932	FALSE
EXT1_4	EXT1	328.87/208.14/257.4	109.4/103.09/88.187	257.4	103.09	-1.3118	3767.2	8724.4	1.6801	0.046468	0.95353	0.092935	0.34932	FALSE
SEC13_13	SEC13	424.9/154.31/361.83	174.05/176.21/264.56	361.83	176.21	-1.0338	23522	12294	1.6795	0.046528	0.95347	0.093057	0.34957	FALSE
SBK1_8	SBK1	1771.2/1178.9/1019.3	841.4/891.84/585.73	1178.9	841.4	-0.48604	188150	40390	1.6792	0.046561	0.95344	0.093122	0.34971	FALSE
SAFB_2	SAFB	424.9/418.07/406.69	349.09/218.17/104.52	418.07	218.17	-0.93518	88.071	14219	1.6787	0.046607	0.95339	0.093213	0.34973	FALSE
COX5B_14	COX5B	645.96/312.21/433.17	183.99/552.61/229.72	433.17	229.72	-0.91211	29956	14736	1.6777	0.046703	0.9533	0.093406	0.35013	FALSE
KTI12_11	KTI12	797.26/807.44/569.22	556.95/505.86/520.41	797.26	520.41	-0.61444	26052	27240	1.6774	0.046731	0.95327	0.093462	0.35023	FALSE
MED26_11	MED26	281.76/365.14/94.135	66.636/123.47/119.76	281.76	119.76	-1.2274	21078	9556.1	1.6761	0.04686	0.95314	0.093719	0.35044	FALSE
ALG8_5	ALG8	151.3/400.13/267.7	153.16/110.28/54.436	267.7	110.28	-1.2718	15544	9075.9	1.676	0.04687	0.95313	0.093741	0.35044	FALSE
PIP5K1A_10	PIP5K1A	400.44/254.79/377.28	187.97/151.04/388.67	377.28	187.97	-1.0013	7769.5	12822	1.676	0.046872	0.95313	0.093745	0.35044	FALSE
FURIN_3	FURIN	439.4/437.81/422.87	233.72/58.737/322.26	437.81	233.72	-0.90265	112.84	14895	1.6739	0.04708	0.95292	0.094159	0.35172	FALSE
TAF8_10	TAF8	531.81/462.93/530.98	196.92/309.27/305.93	530.98	305.93	-0.79346	2315.7	18090	1.6736	0.047101	0.9529	0.094202	0.35172	FALSE
EXOC2_10	EXOC2	943.12/855.89/1181.1	663.37/642.51/573.76	943.12	642.51	-0.55301	32123	32262	1.6736	0.047102	0.9529	0.094205	0.35172	FALSE
UBE2I_10	UBE2I	685.82/732.08/871.49	542.04/467.5/203.59	732.08	467.5	-0.64592	10787	24998	1.6734	0.04712	0.95288	0.09424	0.35174	FALSE
NonTargeting_Human_0696	NonTargeting_Human_0696	502.82/342.71/620.7	207.86/605.35/284.16	502.82	284.16	-0.82114	19765	17124	1.6716	0.047306	0.95269	0.094611	0.35291	FALSE
COX5B_2	COX5B	279.04/293.37/269.9	118.35/228.95/105.61	279.04	118.35	-1.2304	144.41	9463.3	1.6714	0.047321	0.95268	0.094642	0.35292	FALSE
UBA2_9	UBA2	383.23/190.2/448.61	202.89/192.99/47.904	383.23	192.99	-0.98596	20768	13026	1.6706	0.047402	0.9526	0.094804	0.35309	FALSE
SBK1_10	SBK1	1330/1379.8/911.2	777.75/973.36/1008.2	1330	973.36	-0.44996	88928	45606	1.6699	0.04747	0.95253	0.094941	0.35349	FALSE
HIST1H2BB_8	HIST1H2BB	0/245.82/252.99	96.472/69.525/253.67	245.82	96.472	-1.3404	30240	8329.2	1.6695	0.047507	0.95249	0.095014	0.35354	FALSE
BRICD5_11	BRICD5	942.21/1335/647.18	885.16/642.51/519.32	942.21	642.51	-0.55162	120650	32231	1.6694	0.047521	0.95248	0.095041	0.35354	FALSE
CCDC115_10	CCDC115	399.53/331.05/160.32	155.15/57.538/247.14	331.05	155.15	-1.0885	16919	11241	1.6676	0.047696	0.9523	0.095393	0.35474	FALSE
CCDC178_14	CCDC178	232.84/86.127/195.62	141.23/65.929/35.928	195.62	65.929	-1.5547	6687.2	6617.7	1.6673	0.047728	0.95227	0.095456	0.35476	FALSE
EXT1_12	EXT1	271.79/301.44/257.4	254.61/113.88/27.218	271.79	113.88	-1.2477	543.16	9215.7	1.6668	0.047781	0.95222	0.095561	0.35504	FALSE
hsa-mir-1976_6	hsa-mir-1976	139.52/470.11/439.79	130.29/236.15/457.26	439.79	236.15	-0.8943	45540	14963	1.6663	0.047824	0.95218	0.095648	0.35511	FALSE
EIF3F_11	EIF3F	162.17/161.49/234.6	40.777/47.949/160.04	162.17	47.949	-1.737	2623.5	5478.6	1.6661	0.04785	0.95215	0.0957	0.35513	FALSE
OSTC_11	OSTC	111.43/296.96/211.07	195.93/27.57/75.122	211.07	75.122	-1.4781	8652	7144	1.6654	0.047913	0.95209	0.095825	0.35548	FALSE
SMARCB1_11	SMARCB1	351.52/95.098/354.48	81.554/170.22/457.26	351.52	170.22	-1.0419	32880	11941	1.6653	0.047927	0.95207	0.095853	0.35548	FALSE
NOP16_12	NOP16	375.07/223.39/222.1	77.576/266.11/82.743	223.39	82.743	-1.422	11505	7564.1	1.664	0.04806	0.95194	0.096119	0.35636	FALSE
SLX4_3	SLX4	163.08/305.93/255.19	272.51/103.09/38.105	255.19	103.09	-1.2994	5530	8649.1	1.6638	0.04808	0.95192	0.09616	0.3564	FALSE
RAB7A_12	RAB7A	633.28/871.14/552.31	388.87/359.61/533.48	633.28	388.87	-0.70211	31567	21602	1.663	0.04816	0.95184	0.09632	0.35678	FALSE
HAPLN1_12	HAPLN1	393.19/172.25/474.35	203.88/201.38/183.99	393.19	201.38	-0.96181	27701	13367	1.6622	0.048236	0.95176	0.096473	0.35713	FALSE
ANKRD36_5	ANKRD36	429.43/353.48/231.66	138.24/418.35/172.02	353.48	172.02	-1.0348	10304	12008	1.6619	0.048267	0.95173	0.096535	0.35725	FALSE
CIAPIN1_5	CIAPIN1	276.32/177.64/268.43	69.619/171.42/112.14	268.43	112.14	-1.2518	4153.1	9101	1.6611	0.048348	0.95165	0.096697	0.35763	FALSE
RNPEP_12	RNPEP	342.46/549.06/437.58	226.76/487.88/235.16	437.58	235.16	-0.89305	10738	14887	1.6606	0.048402	0.9516	0.096803	0.35774	FALSE
TNFRSF8_5	TNFRSF8	494.66/491.64/320.65	266.54/276.9/560.69	491.64	276.9	-0.82595	14624	16740	1.6604	0.04842	0.95158	0.09684	0.35774	FALSE
PGAP3_13	PGAP3	645.05/505.1/457.44	287.43/216.97/583.56	505.1	287.43	-0.81121	10930	17202	1.6602	0.048439	0.95156	0.096877	0.35774	FALSE
DNAJC18_13	DNAJC18	301.69/46.652/248.58	82.548/327.25/99.074	248.58	99.074	-1.3184	21797	8423.2	1.6601	0.048446	0.95155	0.096891	0.35774	FALSE
ZNHIT1_10	ZNHIT1	1454.1/758.1/1481.2	1127.8/553.81/1083.3	1454.1	1083.3	-0.42437	242570	49894	1.6601	0.04845	0.95155	0.096901	0.35774	FALSE
IPO9_4	IPO9	327.06/185.71/303	337.16/125.87/136.09	303	136.09	-1.1489	7167.5	10282	1.6592	0.048542	0.95146	0.097085	0.35815	FALSE
SLC4A1AP_13	SLC4A1AP	414.94/487.16/451.55	237.7/291.29/246.05	451.55	246.05	-0.87328	1304.1	15366	1.6591	0.048549	0.95145	0.097099	0.35815	FALSE
GNB1L_4	GNB1L	1097.1/523.94/358.89	302.35/187/315.73	523.94	302.35	-0.79118	177900	17848	1.6591	0.04855	0.95145	0.0971	0.35815	FALSE
PAM16_7	PAM16	378.7/518.56/70.601	190.96/305.67/168.75	378.7	190.96	-0.98408	57242	12871	1.6588	0.048576	0.95142	0.097152	0.35818	FALSE
NonTargeting_Human_0682	NonTargeting_Human_0682	498.29/402.82/225.78	250.63/56.34/209.04	402.82	209.04	-0.94309	20229	13697	1.6586	0.048603	0.9514	0.097206	0.35821	FALSE
PFDN6_5	PFDN6	183.91/409.1/425.81	213.83/209.78/322.26	409.1	213.83	-0.93279	25495	13912	1.658	0.048655	0.95134	0.09731	0.35849	FALSE
STRAP_1	STRAP	132.27/390.26/274.32	100.45/215.77/116.49	274.32	116.49	-1.2285	16810	9301.9	1.657	0.048763	0.95124	0.097527	0.35896	FALSE
EWSR1_8	EWSR1	465.67/728.49/607.47	271.51/531.03/369.08	607.47	369.08	-0.71735	17376	20715	1.6564	0.048819	0.95118	0.097637	0.35916	FALSE
LSM2_10	LSM2	262.73/175.84/99.283	55.695/306.87/48.993	175.84	55.695	-1.6412	6705.6	5944	1.6562	0.048842	0.95116	0.097683	0.35916	FALSE
SYP_8	SYP	368.73/456.65/258.87	348.1/145.04/183.99	368.73	183.99	-0.999	9899.6	12530	1.655	0.048963	0.95104	0.097927	0.35947	FALSE
CACNA1A_3	CACNA1A	375.98/401.03/339.77	130.29/580.18/189.44	375.98	189.44	-0.98516	969.31	12778	1.6544	0.049028	0.95097	0.098056	0.35961	FALSE
ZNF213_11	ZNF213	985.7/1657/1157.6	552.98/828.31/1371.8	1157.6	828.31	-0.48236	139510	39655	1.6534	0.049122	0.95088	0.098244	0.36008	FALSE
RBM3_10	RBM3	674.95/671.97/336.09	518.17/421.95/363.63	671.97	421.95	-0.67006	56411	22931	1.6511	0.049359	0.95064	0.098718	0.36114	FALSE
NonTargeting_Human_0921	NonTargeting_Human_0921	122.31/315.8/31.624	17.902/146.24/30.484	122.31	30.484	-1.9695	22831	4123.7	1.6511	0.04936	0.95064	0.098721	0.36114	FALSE
DNASE2_1	DNASE2	453.89/476.39/468.47	222.78/260.12/409.36	468.47	260.12	-0.84631	137.59	15946	1.6509	0.04938	0.95062	0.09876	0.36114	FALSE
MBTPS2_1	MBTPS2	948.56/525.73/579.52	217.81/347.63/526.94	579.52	347.63	-0.73566	69540	19756	1.65	0.04947	0.95053	0.098941	0.36155	FALSE
SSH3_1	SSH3	393.19/35.886/367.72	183.99/255.33/103.43	367.72	183.99	-0.99503	55380	12495	1.6482	0.049654	0.95035	0.099307	0.36266	FALSE
DPAGT1_14	DPAGT1	340.65/340.92/230.93	303.34/164.22/152.42	340.65	164.22	-1.0481	6019.4	11569	1.6473	0.049746	0.95025	0.099491	0.36296	FALSE
INO80D_1	INO80D	318.9/69.978/241.96	87.521/95.897/112.14	241.96	95.897	-1.3262	17749	8197.3	1.6471	0.04977	0.95023	0.09954	0.36297	FALSE
GCFC2_15	GCFC2	63.418/134.57/202.98	66.636/0/35.928	134.57	35.928	-1.8763	4871.2	4540.3	1.6464	0.049839	0.95016	0.099678	0.36326	FALSE
TCERG1_6	TCERG1	221.96/304.14/283.88	167.09/0/124.11	283.88	124.11	-1.1871	2121.8	9628.4	1.6455	0.049934	0.95007	0.099868	0.36349	FALSE
TSPAN11_7	TSPAN11	568.05/768.86/805.3	502.25/451.92/776.26	768.86	502.25	-0.61332	20827	26263	1.6452	0.049969	0.95003	0.099938	0.36349	FALSE
ZNRF3_7	ZNRF3	388.66/604.68/450.08	246.65/547.81/237.34	450.08	246.65	-0.86509	13837	15316	1.6451	0.049976	0.95002	0.099953	0.36349	FALSE
GAGE12B_15	GAGE12B	551.74/421.66/431.7	129.29/232.55/310.29	431.7	232.55	-0.88963	7255.2	14686	1.645	0.049982	0.95002	0.099964	0.36349	FALSE
EXOC2_14	EXOC2	289.91/186.61/220.63	82.548/198.99/0	220.63	82.548	-1.4075	2978.8	7469.9	1.645	0.049986	0.95001	0.099971	0.36349	FALSE
UPP2_8	UPP2	255.48/347.2/323.59	152.17/201.38/107.78	323.59	152.17	-1.0835	2597.8	10986	1.6447	0.050011	0.94999	0.10002	0.36349	FALSE
MRPL42_6	MRPL42	175.76/155.21/29.417	149.18/0/45.726	155.21	45.726	-1.7412	8122.8	5241.8	1.6447	0.050021	0.94998	0.10004	0.36349	FALSE
ZNF143_2	ZNF143	172.14/454.86/652.33	227.75/535.83/250.41	454.86	250.41	-0.85856	59463	15479	1.6445	0.050041	0.94996	0.10008	0.36349	FALSE
MBTPS1_6	MBTPS1	570.76/625.32/612.61	374.95/519.04/270	612.61	374.95	-0.7068	956.39	20892	1.6444	0.050049	0.94995	0.1001	0.36349	FALSE
ELP5_11	ELP5	1087.2/538.29/986.95	653.43/791.15/684.81	986.95	684.81	-0.52663	105670	33772	1.6441	0.050077	0.94992	0.10015	0.36352	FALSE
VOPP1_4	VOPP1	501/514.97/297.85	286.43/215.77/295.04	501	286.43	-0.80447	20733	17061	1.6433	0.050161	0.94984	0.10032	0.36379	FALSE
NCBP2_11	NCBP2	146.77/139.06/94.135	256.6/33.564/38.105	139.06	38.105	-1.8406	1038.8	4692.8	1.6433	0.050164	0.94984	0.10033	0.36379	FALSE
ALDH3A2_6	ALDH3A2	69.76/418.07/272.11	89.51/116.28/229.72	272.11	116.28	-1.2196	31125	9226.6	1.6432	0.050174	0.94983	0.10035	0.36379	FALSE
ALG8_9	ALG8	305.31/82.538/319.18	281.46/47.949/139.36	305.31	139.36	-1.1259	24911	10361	1.6427	0.050223	0.94978	0.10045	0.36389	FALSE
ALDH3A2_8	ALDH3A2	1083.5/515.86/794.27	483.36/523.84/621.66	794.27	523.84	-0.59956	80595	27137	1.6416	0.050334	0.94967	0.10067	0.36445	FALSE
SULT1A2_4	SULT1A2	619.69/574.18/627.32	435.62/240.94/381.05	619.69	381.05	-0.70009	1064.6	21135	1.6415	0.050342	0.94966	0.10068	0.36445	FALSE
SEC61B_2	SEC61B	726.59/564.31/809.71	391.86/674.88/468.15	726.59	468.15	-0.63307	16622	24809	1.6408	0.050418	0.94958	0.10084	0.36476	FALSE
CCDC115_15	CCDC115	451.18/391.16/483.91	76.581/248.13/399.56	451.18	248.13	-0.85996	2336.9	15353	1.6399	0.050514	0.94949	0.10103	0.36513	FALSE
GAGE12B_10	GAGE12B	337.93/159.69/410.37	163.11/169.02/72.945	337.93	163.11	-1.0463	18508	11476	1.6392	0.050585	0.94942	0.10117	0.36554	FALSE
RBBP5_8	RBBP5	157.64/54.726/128.7	61.663/31.167/33.75	128.7	33.75	-1.9001	3154.8	4340.8	1.6384	0.050672	0.94933	0.10134	0.36595	FALSE
KBTBD12_2	KBTBD12	429.43/194.68/384.63	341.13/197.79/192.7	384.63	197.79	-0.95599	19044	13074	1.6376	0.050756	0.94924	0.10151	0.36623	FALSE
hsa-mir-6511a-4_15	hsa-mir-6511a-4	394.1/345.4/146.35	277.48/169.02/139.36	345.4	169.02	-1.0268	20997	11732	1.6349	0.051033	0.94897	0.10207	0.36758	FALSE
RABIF_4	RABIF	715.72/708.75/508.18	454.51/480.68/390.85	708.75	454.51	-0.63982	20138	24196	1.6345	0.051079	0.94892	0.10216	0.36766	FALSE
NDUFV1_6	NDUFV1	100.56/231.47/92.664	22.875/5.9936/161.13	100.56	22.875	-2.0888	8599	3385.9	1.6344	0.05109	0.94891	0.10218	0.36766	FALSE
EXT1_14	EXT1	427.62/514.07/189.74	230.74/793.55/181.82	427.62	230.74	-0.88721	32030	14546	1.6342	0.051109	0.94889	0.10222	0.36766	FALSE
GPR152_7	GPR152	231.02/174.95/230.93	33.815/89.904/249.32	230.93	89.904	-1.3513	1566.9	7821	1.6341	0.051119	0.94888	0.10224	0.36766	FALSE
C12orf43_14	C12orf43	984.79/536.5/617.03	352.07/379.99/397.38	617.03	379.99	-0.69791	70869	21044	1.6341	0.05112	0.94888	0.10224	0.36766	FALSE
SNX1_9	SNX1	298.07/297.86/115.46	216.81/109.08/135	297.86	135	-1.1358	16634	10106	1.6336	0.051174	0.94883	0.10235	0.36773	FALSE
TAF1_15	TAF1	189.35/148.93/495.68	22.875/64.731/215.57	189.35	64.731	-1.534	47737	6403.9	1.6335	0.051178	0.94882	0.10236	0.36773	FALSE
NCBP1_8	NCBP1	65.23/247.61/245.63	99.456/0/139.36	245.63	99.456	-1.2958	16275	8322.8	1.6335	0.051179	0.94882	0.10236	0.36773	FALSE
RUVBL1_14	RUVBL1	427.62/268.25/319.18	150.18/99.493/185.08	319.18	150.18	-1.0826	7176.8	10835	1.6333	0.051205	0.9488	0.10241	0.36773	FALSE
SEC13_15	SEC13	582.54/305.03/205.19	140.23/95.897/265.65	305.03	140.23	-1.1156	43490	10351	1.6319	0.05135	0.94865	0.1027	0.36852	FALSE
PHF3_15	PHF3	492.85/537.4/353.74	442.58/281.7/235.16	492.85	281.7	-0.80481	10668	16782	1.6306	0.051488	0.94851	0.10298	0.369	FALSE
NonTargeting_Human_0555	NonTargeting_Human_0555	635.09/601.09/610.41	649.45/375.2/342.95	610.41	375.2	-0.70064	347.94	20816	1.6304	0.051513	0.94849	0.10303	0.36907	FALSE
SRP14_10	SRP14	286.29/338.23/147.82	127.3/0/178.55	286.29	127.3	-1.1629	10935	9710.8	1.6296	0.051595	0.94841	0.10319	0.3695	FALSE
USP39_1	USP39	308.03/209.93/400.07	134.27/142.65/324.44	308.03	142.65	-1.1052	9047.5	10454	1.629	0.051652	0.94835	0.1033	0.36974	FALSE
PRR3_9	PRR3	469.3/204.55/705.28	255.6/263.72/390.85	469.3	263.72	-0.82911	62889	15974	1.6275	0.05182	0.94818	0.10364	0.37069	FALSE
UBE2Q1_14	UBE2Q1	344.27/383.09/444.2	149.18/197.79/216.66	383.09	197.79	-0.9502	2620.8	13021	1.6274	0.05183	0.94817	0.10366	0.37069	FALSE
SYP_6	SYP	681.29/1117.9/1162.7	431.64/799.54/905.82	1117.9	799.54	-0.48297	96299	38285	1.6268	0.051888	0.94811	0.10378	0.37097	FALSE
GREB1L_13	GREB1L	333.4/420.77/210.33	146.2/420.75/161.13	333.4	161.13	-1.0444	11389	11321	1.6267	0.051899	0.9481	0.1038	0.37097	FALSE
EXOC1_5	EXOC1	615.16/462.93/504.51	291.41/309.27/191.62	504.51	291.41	-0.78975	6986	17182	1.6263	0.051946	0.94805	0.10389	0.3712	FALSE
FAM126A_9	FAM126A	66.136/181.23/186.06	60.668/109.08/4.3549	181.23	60.668	-1.5631	6634.5	6127.2	1.6258	0.051997	0.948	0.10399	0.37145	FALSE
SSH3_2	SSH3	394.1/227.88/123.55	73.597/88.705/156.78	227.88	88.705	-1.3513	19257	7717.1	1.6251	0.052071	0.94793	0.10414	0.37187	FALSE
hsa-mir-3680-1_9	hsa-mir-3680-1	923.19/470.11/911.2	288.42/624.53/653.24	911.2	624.53	-0.54427	97352	31162	1.6239	0.052196	0.9478	0.10439	0.37254	FALSE
UXT_15	UXT	549.93/477.29/589.08	466.45/294.88/327.71	549.93	327.71	-0.74506	3404.8	18740	1.6236	0.052234	0.94777	0.10447	0.37271	FALSE
LIMS3_7	LIMS3	679.48/332.84/208.86	119.35/323.65/161.13	332.84	161.13	-1.042	67764	11302	1.6229	0.052309	0.94769	0.10462	0.37313	FALSE
MKL1_2	MKL1	672.23/260.17/749.4	345.11/426.74/741.42	672.23	426.74	-0.65436	87874	22940	1.6209	0.052524	0.94748	0.10505	0.37394	FALSE
EML4_7	EML4	265.45/284.4/92.664	169.08/113.88/89.275	265.45	113.88	-1.2138	15107	8999.2	1.62	0.052611	0.94739	0.10522	0.37414	FALSE
CAND1_11	CAND1	274.51/287.99/411.84	78.57/129.46/275.45	287.99	129.46	-1.1474	7760.8	9768.9	1.6194	0.052676	0.94732	0.10535	0.37444	FALSE
PLA2G10_2	PLA2G10	232.84/117.53/291.97	152.17/1.1987/92.542	232.84	92.542	-1.3218	8396.2	7886.2	1.617	0.052934	0.94707	0.10587	0.3757	FALSE
ACO2_9	ACO2	447.55/361.55/461.85	321.24/100.69/248.23	447.55	248.23	-0.8478	3800.1	15229	1.6164	0.053	0.947	0.106	0.3757	FALSE
ALG2_15	ALG2	166.7/232.36/150.76	0/183.4/53.348	166.7	53.348	-1.6256	2282.8	5632.8	1.6164	0.053008	0.94699	0.10602	0.3757	FALSE
EWSR1_4	EWSR1	336.12/477.29/299.32	380.92/164.22/156.78	336.12	164.22	-1.0288	10641	11414	1.6161	0.053031	0.94697	0.10606	0.3757	FALSE
STX4_10	STX4	518.22/471.01/383.16	266.54/328.45/149.16	471.01	266.54	-0.81904	4973	16033	1.6156	0.053086	0.94691	0.10617	0.3757	FALSE
RNMT_9	RNMT	222.87/167.77/346.39	157.14/86.307/50.081	222.87	86.307	-1.3585	9146.5	7546.3	1.6156	0.053093	0.94691	0.10619	0.3757	FALSE
BMI1_1	BMI1	295.35/245.82/333.89	162.11/133.06/135	295.35	135	-1.1237	1969.1	10020	1.6156	0.053094	0.94691	0.10619	0.3757	FALSE
TBX6_9	TBX6	272.7/446.78/416.25	233.72/201.38/224.28	416.25	224.28	-0.88922	10770	14157	1.6155	0.053097	0.9469	0.10619	0.3757	FALSE
ZNRF3_12	ZNRF3	1308.2/1396/1148	1318.8/966.16/795.86	1308.2	966.16	-0.43688	16685	44855	1.6151	0.053144	0.94686	0.10629	0.37571	FALSE
C10orf53_6	C10orf53	543.58/487.16/442.73	234.72/279.3/351.66	487.16	279.3	-0.80037	2579	16587	1.6146	0.053199	0.9468	0.1064	0.37595	FALSE
YPEL1_9	YPEL1	377.79/742.84/722.19	455.51/468.7/605.33	722.19	468.7	-0.62265	59520	24658	1.6144	0.053225	0.94677	0.10645	0.37595	FALSE
STT3A_11	STT3A	1098.9/864.86/688.36	787.69/587.37/559.6	864.86	587.37	-0.55741	42974	29567	1.6138	0.053288	0.94671	0.10658	0.37627	FALSE
ANKRD35_7	ANKRD35	260.92/127.4/193.42	182/0/68.59	193.42	68.59	-1.4822	4457.8	6542.5	1.6124	0.053435	0.94656	0.10687	0.37687	FALSE
CLEC12B_8	CLEC12B	142.24/228.77/289.76	294.39/26.372/90.364	228.77	90.364	-1.3305	5603.9	7747.7	1.6119	0.053497	0.9465	0.10699	0.3772	FALSE
TMEM199_8	TMEM199	519.12/1080.2/689.1	412.74/534.63/442.02	689.1	442.02	-0.63942	90916	23520	1.6111	0.05358	0.94642	0.10716	0.37748	FALSE
WDHD1_7	WDHD1	397.72/149.82/315.5	289.42/149.84/125.2	315.5	149.84	-1.0692	17104	10709	1.6107	0.05362	0.94638	0.10724	0.37748	FALSE
OLR1_6	OLR1	159.45/593.02/693.51	364.01/541.82/246.05	593.02	364.01	-0.70258	99040	20219	1.6107	0.053625	0.94638	0.10725	0.37748	FALSE
MESDC2_11	MESDC2	345.18/586.74/447.14	248.64/323.65/241.7	447.14	248.64	-0.84411	14942	15215	1.6105	0.053641	0.94636	0.10728	0.37748	FALSE
ZFR_2	ZFR	179.38/54.726/353.74	60.668/43.154/657.59	179.38	60.668	-1.5485	22970	6064.5	1.6105	0.053645	0.94636	0.10729	0.37748	FALSE
AXIN1_5	AXIN1	736.56/955.47/334.62	338.15/504.66/481.22	736.56	481.22	-0.61307	104740	25152	1.6101	0.053693	0.94631	0.10739	0.37771	FALSE
HNRNPA2B1_7	HNRNPA2B1	210.19/481.77/255.19	63.652/107.88/284.16	255.19	107.88	-1.2344	26682	8649.1	1.6097	0.053728	0.94627	0.10746	0.37785	FALSE
SHC1_11	SHC1	248.24/339.12/226.51	67.63/175.01/103.43	248.24	103.43	-1.255	4366.2	8411.6	1.6076	0.053965	0.94604	0.10793	0.37929	FALSE
PKD1_2	PKD1	793.63/343.61/833.24	529.11/647.31/388.67	793.63	529.11	-0.58401	102050	27115	1.6065	0.054087	0.94591	0.10817	0.37972	FALSE
POLR2C_14	POLR2C	658.64/576.87/401.55	510.21/135.45/351.66	576.87	351.66	-0.71248	18713	19665	1.6062	0.054117	0.94588	0.10823	0.37982	FALSE
PRMT1_7	PRMT1	234.65/207.24/353.01	235.71/56.34/94.719	234.65	94.719	-1.2998	7380	7948	1.605	0.054245	0.94575	0.10849	0.38028	FALSE
COPS6_3	COPS6	41.675/169.56/133.85	37.793/0/47.904	133.85	37.793	-1.7975	4885.7	4515.7	1.6026	0.054512	0.94549	0.10902	0.38186	FALSE
TAF8_13	TAF8	342.46/451.27/583.2	215.82/252.93/372.34	451.27	252.93	-0.83276	14622	15356	1.6017	0.054612	0.94539	0.10922	0.3823	FALSE
COMMD3_2	COMMD3	380.51/740.15/388.31	217.81/94.698/204.68	388.31	204.68	-0.92051	61928	13200	1.6014	0.054647	0.94535	0.10929	0.38244	FALSE
PKD1_15	PKD1	614.25/1267.7/1112	799.63/939.79/532.39	1112	799.63	-0.47522	135990	38082	1.6006	0.054736	0.94526	0.10947	0.38288	FALSE
RANBP1_5	RANBP1	532.71/339.12/320.65	168.08/238.54/116.49	339.12	168.08	-1.0084	18909	11517	1.6005	0.054742	0.94526	0.10948	0.38288	FALSE
EIF3C_4	EIF3C	419.47/259.28/97.812	180.02/111.48/105.61	259.28	111.48	-1.2104	25866	8788.5	1.6003	0.054764	0.94524	0.10953	0.38293	FALSE
ANKHD1-EIF4EBP3_1	ANKHD1-EIF4EBP3	921.38/887.29/671.45	637.51/486.68/608.6	887.29	608.6	-0.54317	23874	30339	1.6	0.054799	0.9452	0.1096	0.38306	FALSE
PFDN2_9	PFDN2	176.67/178.53/176.5	146.2/33.564/59.88	176.67	59.88	-1.5451	1.759	5972	1.5995	0.054851	0.94515	0.1097	0.38328	FALSE
MRPL42_3	MRPL42	555.36/418.07/505.98	996.55/296.08/264.56	505.98	296.08	-0.77106	5082.9	17232	1.5994	0.054862	0.94514	0.10972	0.38328	FALSE
SRGAP2_2	SRGAP2	469.3/653.13/461.12	351.08/267.31/232.99	469.3	267.31	-0.80965	16931	15974	1.599	0.054914	0.94509	0.10983	0.38343	FALSE
TBX1_15	TBX1	62.512/208.14/206.66	77.576/146.24/52.259	206.66	77.576	-1.402	10390	6993.6	1.5983	0.054989	0.94501	0.10998	0.38384	FALSE
SSX4_5	SSX4	651.4/973.41/742.79	488.33/637.72/467.06	742.79	488.33	-0.60408	30771	25366	1.5977	0.055056	0.94494	0.11011	0.38393	FALSE
KIAA1328_3	KIAA1328	403.16/450.37/583.2	192.94/252.93/425.69	450.37	252.93	-0.82989	9935.8	15326	1.5961	0.055238	0.94476	0.11048	0.38481	FALSE
INPP5J_12	INPP5J	454.8/585.84/666.3	375.94/339.24/360.37	585.84	360.37	-0.6995	11823	19973	1.5956	0.055292	0.94471	0.11058	0.38503	FALSE
GAPDH_7	GAPDH	173.95/172.25/33.83	249.63/0/57.702	172.25	57.702	-1.5614	9582	5821.8	1.5954	0.055314	0.94469	0.11063	0.38503	FALSE
VPS72_9	VPS72	686.73/469.21/393.46	227.75/608.95/267.83	469.21	267.83	-0.80664	26526	15971	1.5944	0.055425	0.94457	0.11085	0.38545	FALSE
RABIF_12	RABIF	1003.8/1044.3/1316.4	742.94/640.11/857.92	1044.3	742.94	-0.49065	37847	35748	1.5938	0.055486	0.94451	0.11097	0.38574	FALSE
DHRSX_12	DHRSX	680.39/404.62/956.8	437.61/388.38/577.02	680.39	437.61	-0.63555	76226	23221	1.5933	0.055551	0.94445	0.1111	0.38588	FALSE
KCTD5_5	KCTD5	350.61/304.14/392.72	133.27/177.41/230.81	350.61	177.41	-0.97879	1966.6	11910	1.5926	0.055625	0.94438	0.11125	0.38629	FALSE
ATP6V1B1_1	ATP6V1B1	286.29/428.84/430.96	236.71/5.9936/303.75	428.84	236.71	-0.85463	10163	14588	1.5924	0.055648	0.94435	0.1113	0.38634	FALSE
RABIF_14	RABIF	449.36/328.36/534.66	252.62/243.34/399.56	449.36	252.62	-0.82843	10959	15291	1.5922	0.055667	0.94433	0.11133	0.38636	FALSE
INTS12_13	INTS12	956.71/601.99/716.31	467.44/737.21/407.18	716.31	467.44	-0.61472	35430	24456	1.5914	0.055758	0.94424	0.11152	0.38688	FALSE
CDC23_10	CDC23	230.12/0/188.27	61.663/67.128/139.36	188.27	67.128	-1.4741	18598	6367.2	1.5907	0.055844	0.94416	0.11169	0.38726	FALSE
HAPLN1_9	HAPLN1	1020.1/581.36/689.1	966.71/342.83/445.29	689.1	445.29	-0.62883	60594	23520	1.5898	0.05594	0.94406	0.11188	0.38738	FALSE
USP39_6	USP39	278.13/273.63/113.26	122.33/145.04/52.259	273.63	122.33	-1.155	12870	9278.6	1.5893	0.055998	0.944	0.112	0.38766	FALSE
EXOC3_14	EXOC3	271.79/858.58/520.69	338.15/122.27/309.2	520.69	309.2	-0.74999	88059	17737	1.5884	0.0561	0.9439	0.1122	0.38826	FALSE
PIK3C3_14	PIK3C3	1207.7/1354.7/1041.4	1005.5/884.65/514.97	1207.7	884.65	-0.4486	24637	41384	1.5878	0.056162	0.94384	0.11232	0.38836	FALSE
GFER_6	GFER	847.99/846.02/946.5	577.84/768.38/325.53	847.99	577.84	-0.55259	4853.8	28986	1.5868	0.056281	0.94372	0.11256	0.38863	FALSE
DCAF4_11	DCAF4	680.39/804.75/525.1	438.6/511.85/293.96	680.39	438.6	-0.63228	19790	23221	1.5867	0.056287	0.94371	0.11257	0.38863	FALSE
NonTargeting_Human_0453	NonTargeting_Human_0453	445.74/184.81/585.4	250.63/335.64/228.63	445.74	250.63	-0.82814	43794	15167	1.5855	0.056425	0.94357	0.11285	0.38926	FALSE
NonTargeting_Human_0427	NonTargeting_Human_0427	447.55/165.97/424.34	576.84/134.26/234.08	424.34	234.08	-0.8555	33647	14434	1.5854	0.056436	0.94356	0.11287	0.38926	FALSE
MBTPS2_7	MBTPS2	579.82/947.4/667.77	428.66/782.76/362.55	667.77	428.66	-0.63833	42962	22787	1.5841	0.056588	0.94341	0.11318	0.39009	FALSE
USP9X_7	USP9X	197.5/258.38/183.12	79.565/73.122/5.4436	197.5	73.122	-1.4212	1956.5	6681.6	1.5835	0.056652	0.94335	0.1133	0.39031	FALSE
KCTD5_2	KCTD5	366.92/537.4/308.88	208.86/190.6/172.02	366.92	190.6	-0.94133	16215	12468	1.5833	0.056674	0.94333	0.11335	0.39035	FALSE
hsa-mir-6817_1	hsa-mir-6817	636.9/978.8/944.29	708.13/514.25/659.77	944.29	659.77	-0.51662	47841	32302	1.5831	0.0567	0.9433	0.1134	0.39038	FALSE
MSTO1_13	MSTO1	828.06/684.53/1125.2	752.88/385.99/561.78	828.06	561.78	-0.5589	54449	28300	1.5829	0.056725	0.94327	0.11345	0.39038	FALSE
SUMO2_11	SUMO2	112.34/268.25/96.342	189.96/0/29.396	112.34	29.396	-1.8987	12282	3785.4	1.5822	0.056802	0.9432	0.1136	0.39076	FALSE
RNF151_5	RNF151	1321.8/1220.1/1089.9	741.94/896.64/1176.9	1220.1	896.64	-0.44401	13649	41814	1.582	0.056826	0.94317	0.11365	0.39076	FALSE
CDIPT_3	CDIPT	228.31/435.12/74.279	154.16/1.1987/92.542	228.31	92.542	-1.2936	33248	7731.7	1.5818	0.056852	0.94315	0.1137	0.39081	FALSE
CLEC12B_5	CLEC12B	201.13/273.63/130.91	50.723/75.519/106.7	201.13	75.519	-1.4014	5093.9	6805.1	1.5808	0.056962	0.94304	0.11392	0.39135	FALSE
WDR37_6	WDR37	669.52/566.1/641.3	574.86/407.56/292.87	641.3	407.56	-0.65268	3225	21877	1.5803	0.057019	0.94298	0.11404	0.39136	FALSE
COMMD2_4	COMMD2	543.58/1130.4/793.53	609.67/531.03/533.48	793.53	533.48	-0.57198	87982	27112	1.5794	0.057123	0.94288	0.11425	0.39146	FALSE
NFRKB_10	NFRKB	741.99/584.94/426.55	362.02/489.08/180.73	584.94	362.02	-0.69072	24877	19942	1.5788	0.057196	0.9428	0.11439	0.39185	FALSE
SAFB_13	SAFB	405.88/230.57/339.77	142.22/368.01/170.93	339.77	170.93	-0.98698	8147.5	11539	1.5782	0.057265	0.94274	0.11453	0.3921	FALSE
PTAR1_6	PTAR1	752.87/493.44/675.13	435.62/630.52/388.67	675.13	435.62	-0.63092	19527	23040	1.5779	0.057289	0.94271	0.11458	0.39216	FALSE
RPL17_10	RPL17	202.94/343.61/347.86	145.21/173.81/265.65	343.61	173.81	-0.97915	9903.3	11670	1.5778	0.05731	0.94269	0.11462	0.39219	FALSE
ARFRP1_3	ARFRP1	215.62/78.95/111.79	205.87/0/29.396	111.79	29.396	-1.8916	5930.1	3766.6	1.5768	0.05742	0.94258	0.11484	0.39261	FALSE
GFER_3	GFER	378.7/552.65/367.72	131.28/219.36/200.33	378.7	200.33	-0.91532	15190	12871	1.5757	0.057548	0.94245	0.1151	0.39337	FALSE
KTI12_14	KTI12	464.77/227.88/275.79	125.31/112.68/192.7	275.79	125.31	-1.1318	19004	9352.1	1.5734	0.05781	0.94219	0.11562	0.39439	FALSE
UBA2_10	UBA2	207.47/427.94/466.26	234.72/317.66/238.43	427.94	238.43	-0.84118	25039	14557	1.5723	0.05794	0.94206	0.11588	0.39506	FALSE
LGR5_2	LGR5	219.25/236.85/139.73	40.777/87.506/307.02	219.25	87.506	-1.3153	3316.2	7422.7	1.572	0.05797	0.94203	0.11594	0.39515	FALSE
PFDN2_15	PFDN2	290.82/369.63/579.52	193.94/232.55/75.122	369.63	193.94	-0.92695	25133	12560	1.5716	0.058026	0.94197	0.11605	0.39517	FALSE
PAM16_12	PAM16	504.63/576.87/510.39	337.16/303.27/219.92	510.39	303.27	-0.74905	2226.5	17383	1.5713	0.058054	0.94195	0.11611	0.39517	FALSE
RPL23A_6	RPL23A	29.897/32.298/59.57	5.9674/0/114.32	32.298	5.9674	-2.2567	374.77	1078.7	1.5708	0.058112	0.94189	0.11622	0.39535	FALSE
SHC1_5	SHC1	250.96/96.893/233.87	123.33/97.096/32.662	233.87	97.096	-1.2596	9527	7921.4	1.5707	0.058132	0.94187	0.11626	0.39538	FALSE
CDIPT_15	CDIPT	294.44/394.75/383.9	423.68/204.98/44.638	383.9	204.98	-0.90196	4059.8	13049	1.5694	0.058278	0.94172	0.11656	0.39615	FALSE
NonTargeting_Human_0710	NonTargeting_Human_0710	75.196/304.14/348.59	214.82/62.333/145.89	304.14	145.89	-1.0547	27195	10321	1.5687	0.058356	0.94164	0.11671	0.39646	FALSE
SPATA25_7	SPATA25	373.26/600.2/350.8	185.98/391.98/197.06	373.26	197.06	-0.91812	26002	12685	1.5682	0.058419	0.94158	0.11684	0.39667	FALSE
IRS1_4	IRS1	352.42/547.26/564.81	172.06/333.24/597.71	547.26	333.24	-0.71398	19135	18649	1.5675	0.0585	0.9415	0.117	0.39705	FALSE
GTF2E1_4	GTF2E1	362.39/558.03/337.56	188.97/154.63/357.1	362.39	188.97	-0.93577	19446	12313	1.5673	0.058524	0.94148	0.11705	0.39705	FALSE
CENPA_10	CENPA	359.67/454.86/354.48	186.98/372.8/160.04	359.67	186.98	-0.94013	4543.6	12220	1.5668	0.058579	0.94142	0.11716	0.39725	FALSE
ZNHIT1_14	ZNHIT1	643.24/830.77/561.13	409.76/411.16/442.02	643.24	411.16	-0.6444	20953	21944	1.5668	0.058587	0.94141	0.11717	0.39725	FALSE
TREM1_2	TREM1	482.88/273.63/449.35	289.42/181.01/255.85	449.35	255.85	-0.81011	16000	15291	1.5659	0.058681	0.94132	0.11736	0.39766	FALSE
EXT1_9	EXT1	364.2/137.26/175.77	61.663/0/107.78	175.77	61.663	-1.4962	18495	5941.4	1.5653	0.058761	0.94124	0.11752	0.39799	FALSE
OSTC_13	OSTC	343.36/453.06/706.01	415.73/258.92/236.25	453.06	258.92	-0.80481	38009	15418	1.5646	0.058841	0.94116	0.11768	0.39831	FALSE
SNAPC2_5	SNAPC2	312.56/319.39/100.75	151.17/179.81/152.42	312.56	152.42	-1.0312	22454	10609	1.5644	0.058865	0.94113	0.11773	0.39832	FALSE
LGR5_13	LGR5	67.042/362.45/428.76	209.85/189.4/104.52	362.45	189.4	-0.93275	45831	12315	1.5638	0.058934	0.94107	0.11787	0.39832	FALSE
RALB_13	RALB	193.88/170.46/72.072	131.28/0/58.791	170.46	58.791	-1.5199	5114.2	5760.7	1.5634	0.058982	0.94102	0.11796	0.39849	FALSE
CEBPZ_4	CEBPZ	350.61/202.76/436.85	295.38/107.88/180.73	350.61	180.73	-0.9522	14649	11910	1.5619	0.059154	0.94085	0.11831	0.39919	FALSE
IRS4_15	IRS4	772.8/1034.4/356.68	844.38/519.04/400.65	772.8	519.04	-0.57332	120800	26398	1.5618	0.059167	0.94083	0.11833	0.39919	FALSE
NonTargeting_Human_0366	NonTargeting_Human_0366	758.3/600.2/758.23	507.23/831.91/474.68	758.23	507.23	-0.57907	12487	25897	1.5598	0.059408	0.94059	0.11882	0.40029	FALSE
DET1_11	DET1	164.89/155.21/56.628	50.723/112.68/34.839	155.21	50.723	-1.5946	4905.8	5241.8	1.5597	0.059413	0.94059	0.11883	0.40029	FALSE
[truncated: 10,609 more rows]

## Sheet: LDLRKO_LP-depl_gene
id	num	neg|score	neg|p-value	neg|fdr	neg|rank	neg|goodsgrna	neg|lfc	pos|score	pos|p-value	pos|fdr	pos|rank	pos|goodsgrna	pos|lfc
[truncated: 1,751 more rows]

## Sheet: LDLRKO_LP-depl_gRNA
sgrna	Gene	control_count	treatment_count	control_mean	treat_mean	LFC	control_var	adj_var	score	p.low	p.high	p.twosided	FDR	high_in_treatment
[truncated: 12,205 more rows]
