# Supplementary material for: Genome-scale CRISPR screening for modifiers of cellular LDL uptake
Source: bioRxiv preprint, doi:10.1101/2020.07.01.182246, version 1 (2020-07-01)
Supplement: Supplemental Table 7 [file 182246_file20.xlsx]

## Sheet: annotation
Orthogonal screen of surface or total LDLR staining in HuH7 cells cultured under lipoprotein-rich conditions
Output files from MAGeCK analysis
control = LDLRlow sorted cells
treatment = LDLRhigh sorted cells
Gene-level analysis
id	gene ID
num	number of individual gRNAs detected for a given gene
neg|score	MAGeCK significance score for depletion in LDLRhigh cells (low score indicates gene disruption reduces LDLR staining)
neg|p-value	p-value for depletion in LDLRhigh cells (gene disruption reduces LDLR staining)
neg|fdr	FDR for depletion in LDLRhigh cells (gene disruption reduces LDLR staining)
neg|rank	gene rank for depletion in LDLRhigh cells (gene disruption reduces LDLR staining)
neg|goodsgrna	number of gene-targeting gRNA with significant depletion in LDLRhigh cells (gene disruption reduces LDLR staining)
neg|lfc	composite log2 fold change of gene-targeting gRNA (negative value indicates gene disruption reduces LDLR staining)
pos|score	MAGeCK significance score for enrichment in LDLRhigh cells (low score indicates gene disruption increases LDLR staining)
pos|p-value	p-value for enrichment in LDLRhigh cells (gene disruption increases LDLR staining)
pos|fdr	FDR for enrichment in LDLRhigh cells (gene disruption increases LDLR staining)
pos|rank	gene rank for enrichment in LDLRhigh cells (gene disruption increases LDLR staining)
pos|goodsgrna	number of gene-targeting gRNA with significant enrichment in LDLRhigh cells (gene disruption increases LDLR staining)
pos|lfc	composite log2 fold change of gene-targeting gRNA (positive value indicates gene disruption increases LDLR staining)
gRNA-level analysis
sgrna	GeCKO library gRNA identifier
gene	targeted gene
control_count	individual replicate normalized read counts in LDLRlow cells
treatment_count	individual replicate normalized read counts in LDLRhigh cells
control_mean	mean normalized read counts in LDLRlow cells
treat_mean	mean normalized read counts in LDLRhigh cells
LFC	log2 fold change of normalized read counts in LDLRhigh relative to LDLRlow cells
control_var	raw variance in LDLRlow cells
adj_var	adjusted variance in LDLRlow cells
score	MAGeCK significance score for individual gRNA
p.low	p-value for depletion in LDLRhigh cells (gene disruption reduces LDLR staining)
p.high	p-value for enrichment in LDLRhigh cells (gene disruption increases LDLR staining)
p.twosided	minimum p-value for either enrichment or depletion
FDR	FDR for p.twosided
high_in_treatment	whether normalized read counts for gRNA are higher in LDLRhigh than LDLRlow cells (gene disruption increases LDLR staining)

## Sheet: sLDLR_gene
id	num	neg|score	neg|p-value	neg|fdr	neg|rank	neg|goodsgrna	neg|lfc	pos|score	pos|p-value	pos|fdr	pos|rank	pos|goodsgrna	pos|lfc
LDLR	15	1.0442e-29	2.8256e-06	0.00033	1	15	-3.2936	1	1	0.999997	1752	0	-3.2936
SCAP	15	1.1391e-16	2.8256e-06	0.00033	2	12	-1.7149	0.9997	0.99975	0.999997	1742	0	-1.7149
TAF2	15	6.3726e-16	2.8256e-06	0.00033	3	15	-1.966	1	1	0.999997	1750	0	-1.966
PROX1	15	7.715e-15	2.8256e-06	0.00033	4	15	-1.9337	1	1	0.999997	1751	0	-1.9337
HNF4A	15	3.2918e-14	2.8256e-06	0.00033	5	13	-1.4161	0.99875	0.99862	0.999997	1734	0	-1.4161
TAF8	15	4.1393e-14	2.8256e-06	0.00033	6	14	-1.4097	0.99849	0.99833	0.999997	1732	0	-1.4097
MBTPS1	15	6.3874e-10	2.8256e-06	0.00033	7	14	-1.3762	0.98654	0.98922	0.999997	1708	1	-1.3762
hsa-mir-6886	13	6.4777e-10	2.8256e-06	0.00033	8	10	-1.1949	1	1	0.999997	1749	0	-1.1949
DYRK1A	15	2.0376e-09	2.8256e-06	0.00033	9	13	-0.91636	0.99722	0.99712	0.999997	1725	0	-0.91636
CEBPA	15	3.2555e-09	2.8256e-06	0.00033	10	12	-1.5721	0.99997	0.99998	0.999997	1744	0	-1.5721
WRB	15	2.18e-08	2.8256e-06	0.00033	11	11	-1.3338	0.78544	0.91661	0.999997	1448	1	-1.3338
TMEM165	15	9.731e-08	2.8256e-06	0.00033	12	13	-0.81129	0.99999	0.99999	0.999997	1746	0	-0.81129
CABIN1	15	1.3173e-07	2.8256e-06	0.00033	13	14	-0.68789	0.99999	0.99999	0.999997	1747	0	-0.68789
MESDC2	15	1.5184e-07	2.8256e-06	0.00033	14	12	-1.0176	0.92521	0.96837	0.999997	1640	2	-1.0176
TAF7	15	3.164e-07	2.8256e-06	0.00033	15	11	-1.0746	0.89384	0.95913	0.999997	1599	1	-1.0746
CHD7	15	1.6654e-06	1.4128e-05	0.001456	16	12	-0.8961	0.69089	0.8804	0.999997	1344	1	-0.8961
TAF1	15	1.7137e-06	1.4128e-05	0.001456	17	11	-0.94012	0.47514	0.75126	0.999997	992	2	-0.94012
STAG2	15	2.0616e-06	1.9779e-05	0.001925	18	11	-0.93321	0.97708	0.98615	0.999997	1698	1	-0.93321
ATP13A1	15	3.9787e-06	3.1082e-05	0.002866	19	13	-0.52195	0.99998	0.99998	0.999997	1745	0	-0.52195
SUMO2	15	5.6983e-06	5.3687e-05	0.004703	20	11	-0.62035	0.92944	0.96992	0.999997	1645	2	-0.62035
ELOF1	15	7.6782e-06	6.4989e-05	0.005422	21	11	-0.84818	1	1	0.999997	1748	0	-0.84818
CDC73	15	1.2392e-05	0.0001102	0.008776	22	10	-1.0939	0.99217	0.99243	0.999997	1714	1	-1.0939
MBTPS2	15	2.026e-05	0.00017801	0.01356	23	8	-0.68055	0.026138	0.11243	0.911274	128	1	-0.68055
RABIF	15	3.4126e-05	0.00029104	0.021246	24	9	-0.69933	0.99353	0.99351	0.999997	1716	1	-0.69933
CHMP1A	15	5.3108e-05	0.00046623	0.032673	25	12	-0.5808	0.84043	0.94069	0.999997	1534	1	-0.5808
C21orf59	15	5.9697e-05	0.00050579	0.034082	26	8	-0.76488	0.99671	0.99657	0.999997	1721	0	-0.76488
PPIL2	15	0.00010222	0.00087877	0.057022	27	11	-0.6928	0.99368	0.99364	0.999997	1717	1	-0.6928
KMT2D	15	0.00012134	0.0010483	0.065594	28	9	-0.88681	0.99731	0.99719	0.999997	1726	0	-0.88681
TAF10	15	0.0003125	0.002399	0.14493	29	10	-0.50617	0.99846	0.99827	0.999997	1731	0	-0.50617
KIAA1432	15	0.00032879	0.0025176	0.14703	30	9	-0.90906	0.81887	0.93093	0.999997	1498	3	-0.90906
STT3A	15	0.0004248	0.0033597	0.189875	31	11	-0.60823	0.99961	0.99964	0.999997	1740	0	-0.60823
HYOU1	15	0.00057362	0.004456	0.243967	32	9	-1.1435	0.95349	0.97905	0.999997	1674	2	-1.1435
SAFB	15	0.00061537	0.0047329	0.251275	33	9	-0.57416	0.91666	0.96582	0.999997	1631	1	-0.57416
EXOC8	15	0.0008708	0.0062927	0.303318	34	9	-0.67153	0.26786	0.56099	0.999997	620	3	-0.67153
DHRSX	15	0.00088109	0.0063605	0.303318	35	7	-0.091693	0.054711	0.19715	0.999997	193	5	-0.091693
WDR18	15	0.00088717	0.0064057	0.303318	36	9	-0.49749	0.98332	0.98803	0.999997	1706	1	-0.49749
S100A14	15	0.00093051	0.00666	0.304691	37	10	-0.64668	0.97012	0.9844	0.999997	1691	1	-0.64668
PFDN2	14	0.00094158	0.0062022	0.303318	38	9	-0.78145	0.15477	0.39466	0.999997	389	1	-0.78145
DPAGT1	15	0.00099596	0.0071177	0.304691	39	9	-0.64307	0.98691	0.98939	0.999997	1709	1	-0.64307
INTS8	15	0.0010044	0.007146	0.304691	40	10	-0.65674	0.9852	0.98868	0.999997	1707	1	-0.65674
MTA2	15	0.0010154	0.0072025	0.304691	41	9	-0.60984	0.99915	0.99903	0.999997	1738	0	-0.60984
USP22	15	0.0010325	0.0073042	0.304691	42	9	-0.51958	0.99781	0.9976	0.999997	1729	0	-0.51958
GPN1	15	0.0011453	0.0078694	0.320631	43	8	-0.5945	0.11274	0.32954	0.999997	322	6	-0.5945
PTPMT1	15	0.0012809	0.0086775	0.345522	44	8	-0.66036	0.29658	0.58924	0.999997	672	2	-0.66036
MED8	15	0.0013631	0.0091522	0.356326	45	7	-0.58727	0.18271	0.44343	0.999997	446	5	-0.58727
GTF2A2	15	0.0014057	0.0093556	0.356328	46	9	-0.68627	0.8446	0.94263	0.999997	1541	1	-0.68627
OSTC	15	0.0016829	0.011153	0.415736	47	10	-0.67357	0.99903	0.99888	0.999997	1737	0	-0.67357
GTF3A	15	0.001738	0.011543	0.421308	48	9	-0.66008	0.23793	0.5226	0.999997	555	3	-0.66008
INTS12	15	0.0018617	0.012272	0.438776	49	10	-0.69673	0.92353	0.96771	0.999997	1636	1	-0.69673
KLHL20	15	0.0019195	0.012566	0.440206	50	9	-0.50591	0.819	0.93097	0.999997	1499	2	-0.50591
CERS2	15	0.0019755	0.012814	0.440206	51	7	-0.39	0.96093	0.98268	0.999997	1683	1	-0.39
RAB10	15	0.0020844	0.013419	0.452113	52	10	-0.41907	0.99513	0.99504	0.999997	1718	0	-0.41907
GPN2	15	0.0021632	0.013843	0.457594	53	8	-0.77733	0.80085	0.92312	0.999997	1470	3	-0.77733
PIAS1	15	0.0022314	0.014227	0.461588	54	8	-0.54025	0.99992	0.99994	0.999997	1743	0	-0.54025
IRS1	15	0.0024703	0.015719	0.50072	55	9	-0.47724	0.6671	0.86785	0.999997	1301	3	-0.47724
USO1	15	0.0025716	0.016312	0.510343	56	9	-0.64903	0.85467	0.94751	0.999997	1556	1	-0.64903
POLR3C	15	0.0027294	0.017177	0.526545	57	9	-1.0203	0.99829	0.99809	0.999997	1730	0	-1.0203
S100A10	15	0.0032226	0.019726	0.585753	58	8	-0.63732	0.87639	0.95478	0.999997	1580	2	-0.63732
DCPS	15	0.0039077	0.023133	0.633277	59	9	-0.4767	0.99895	0.99879	0.999997	1736	0	-0.4767
THOC6	15	0.0043381	0.025366	0.673342	60	9	-0.46442	0.99962	0.99964	0.999997	1741	0	-0.46442
TRAPPC1	15	0.0047007	0.027089	0.708364	61	8	-0.70327	0.62702	0.84379	0.999997	1227	4	-0.70327
STK11	15	0.0050707	0.028903	0.744685	62	9	-0.5255	0.33794	0.62946	0.999997	751	2	-0.5255
NCBP1	15	0.00552	0.031141	0.790716	63	7	-0.14672	0.43598	0.7206	0.999997	919	4	-0.14672
RTBDN	15	0.0061447	0.034199	0.843885	64	6	0.013129	0.20254	0.47211	0.999997	478	4	0.013129
RNMT	15	0.006274	0.034741	0.845366	65	7	-0.45945	0.51346	0.77487	0.999997	1052	4	-0.45945
PDRG1	15	0.0071731	0.039047	0.873962	66	6	-0.37687	0.90864	0.96321	0.999997	1621	2	-0.37687
DOCK5	15	0.0073753	0.040014	0.873962	67	8	-0.35268	0.15808	0.40559	0.999997	400	5	-0.35268
GPN3	15	0.007384	0.040059	0.873962	68	7	0.23245	0.25144	0.54139	0.999997	592	6	0.23245
EXOC4	15	0.0075771	0.04098	0.873962	69	9	-0.58682	0.84697	0.94381	0.999997	1546	2	-0.58682
INTS2	15	0.0076858	0.041483	0.873962	70	7	-0.41909	0.32612	0.61818	0.999997	732	4	-0.41909
NID1	15	0.0079138	0.042681	0.873962	71	7	-0.21618	0.54967	0.79637	0.999997	1115	2	-0.21618
SETD1A	15	0.0080389	0.043241	0.873962	72	9	-0.58112	0.97854	0.98647	0.999997	1702	1	-0.58112
CTDP1	15	0.0080683	0.043399	0.873962	73	8	-0.46993	0.61784	0.83827	0.999997	1211	2	-0.46993
C1GALT1	15	0.0092734	0.048892	0.922976	74	9	-0.50735	0.43553	0.72028	0.999997	918	3	-0.50735
C19orf52	15	0.0095739	0.050276	0.922976	75	6	-0.24006	0.96254	0.9829	0.999997	1687	1	-0.24006
TM9SF2	15	0.0097691	0.051231	0.922976	76	5	-0.1251	0.20202	0.47143	0.999997	476	4	-0.1251
CDC23	15	0.010012	0.052339	0.922976	77	7	-0.26615	0.43183	0.71676	0.999997	908	4	-0.26615
MARS2	15	0.010872	0.056301	0.932047	78	6	-0.28498	0.65188	0.85891	0.999997	1276	4	-0.28498
AMTN	15	0.010902	0.056391	0.932047	79	8	-0.41882	0.91557	0.96552	0.999997	1629	1	-0.41882
TMEM67	15	0.01233	0.061957	0.999997	80	6	-0.15627	0.61558	0.8369	0.999997	1206	1	-0.15627
NCBP2	15	0.012579	0.062963	0.999997	81	6	-0.13948	0.59135	0.82194	0.999997	1169	4	-0.13948
RANBP1	15	0.012599	0.063065	0.999997	82	6	-0.21689	0.94315	0.97484	0.999997	1655	1	-0.21689
RBBP5	15	0.013171	0.065111	0.999997	83	6	-0.42772	0.1659	0.4181	0.999997	414	5	-0.42772
MED12	15	0.013177	0.065122	0.999997	84	8	-0.37702	0.79934	0.92254	0.999997	1469	1	-0.37702
TOMM22	15	0.01339	0.066021	0.999997	85	6	-0.23729	0.89564	0.95948	0.999997	1603	2	-0.23729
SEZ6L2	15	0.013901	0.067987	0.999997	86	8	-0.33427	0.6975	0.88265	0.999997	1354	3	-0.33427
SRP9	15	0.014399	0.069841	0.999997	87	8	-0.45056	0.81572	0.92962	0.999997	1489	1	-0.45056
TRIAP1	15	0.015351	0.073559	0.999997	88	8	-0.48386	0.8949	0.95937	0.999997	1601	2	-0.48386
SETDB1	15	0.015693	0.074831	0.999997	89	7	-0.45994	0.97529	0.98572	0.999997	1696	1	-0.45994
GTF2H2	15	0.01681	0.078956	0.999997	90	6	-0.3225	0.38568	0.67438	0.999997	833	4	-0.3225
NonTargeting_Human_0177	1	0.017273	0.017431	0.526545	91	1	-1.5191	0.98273	0.98278	0.999997	1705	0	-1.5191
CTCF	15	0.017612	0.081867	0.999997	92	6	0.047335	0.3834	0.67247	0.999997	829	5	0.047335
CHAF1B	15	0.017654	0.082008	0.999997	93	7	-0.37918	0.57097	0.80902	0.999997	1144	2	-0.37918
ATP5I	15	0.01871	0.085857	0.999997	94	8	-0.61681	0.84696	0.94381	0.999997	1545	1	-0.61681
ALG2	15	0.018909	0.086614	0.999997	95	7	-0.29345	0.99701	0.99692	0.999997	1724	0	-0.29345
LAS1L	15	0.019565	0.088993	0.999997	96	8	-0.64887	0.65125	0.85849	0.999997	1275	1	-0.64887
EXOC1	15	0.020647	0.092938	0.999997	97	8	-0.50948	0.77519	0.91233	0.999997	1433	3	-0.50948
NonTargeting_Human_0704	1	0.021129	0.021308	0.622195	98	1	-0.97095	0.97887	0.9787	0.999997	1703	0	-0.97095
hsa-mir-6515	13	0.021945	0.093378	0.999997	99	6	-0.24186	0.66485	0.84809	0.999997	1297	3	-0.24186
PTAR1	15	0.022414	0.099137	0.999997	100	8	-0.44	0.86266	0.95114	0.999997	1566	2	-0.44
NonTargeting_Human_0792	1	0.022442	0.022698	0.633277	101	1	-1.1028	0.97756	0.97744	0.999997	1701	0	-1.1028
UBE2I	15	0.02248	0.099329	0.999997	102	7	-0.0033629	0.99111	0.99162	0.999997	1712	1	-0.0033629
NonTargeting_Human_0219	1	0.02277	0.02302	0.633277	103	1	-1.1643	0.97723	0.97713	0.999997	1700	0	-1.1643
NonTargeting_Human_0944	1	0.022852	0.023105	0.633277	104	1	-0.92078	0.97715	0.97707	0.999997	1699	0	-0.92078
TBX6	15	0.023812	0.10383	0.999997	105	8	-0.37424	0.47098	0.74859	0.999997	985	3	-0.37424
SPATA5	15	0.023972	0.10439	0.999997	106	6	-0.33764	0.34026	0.63175	0.999997	757	3	-0.33764
NonTargeting_Human_0603	1	0.024001	0.024201	0.652323	107	1	-1.03	0.976	0.97574	0.999997	1697	0	-1.03
GET4	15	0.025579	0.11007	0.999997	108	5	-0.27727	0.93774	0.97292	0.999997	1651	2	-0.27727
MED26	15	0.026005	0.11151	0.999997	109	8	-0.3555	0.40496	0.69218	0.999997	866	4	-0.3555
POLR2E	15	0.026417	0.11295	0.999997	110	8	-0.31612	0.67019	0.86963	0.999997	1305	4	-0.31612
WNT3A	15	0.026944	0.11471	0.999997	111	8	-0.34882	0.8111	0.92755	0.999997	1485	1	-0.34882
PFDN6	15	0.027283	0.11587	0.999997	112	8	-0.32835	0.029154	0.1226	0.930543	136	5	-0.32835
GTF3C4	15	0.027459	0.11646	0.999997	113	5	-0.30198	0.28365	0.57695	0.999997	645	4	-0.30198
HNRNPA2B1	15	0.027527	0.11671	0.999997	114	8	-0.55797	0.99886	0.99871	0.999997	1735	0	-0.55797
GMPPB	15	0.028726	0.1208	0.999997	115	6	-0.3183	0.63499	0.84877	0.999997	1245	4	-0.3183
hsa-mir-6859-1	14	0.028815	0.11905	0.999997	116	5	0.10569	0.029482	0.12269	0.930543	137	6	0.10569
DNASE2	15	0.029496	0.12335	0.999997	117	8	-0.40818	0.8226	0.93251	0.999997	1502	2	-0.40818
DROSHA	15	0.029878	0.12455	0.999997	118	8	-0.49457	0.71198	0.88798	0.999997	1370	3	-0.49457
TMEM30A	15	0.030303	0.12603	0.999997	119	7	-0.39956	0.99595	0.99583	0.999997	1719	0	-0.39956
MORC2	15	0.030792	0.12778	0.999997	120	7	-0.35841	0.77527	0.91239	0.999997	1434	2	-0.35841
BTF3	15	0.030907	0.12821	0.999997	121	8	-0.61259	0.67919	0.87487	0.999997	1322	3	-0.61259
PHKG2	15	0.031337	0.12958	0.999997	122	8	-0.3867	0.62611	0.84319	0.999997	1226	4	-0.3867
DAP3	15	0.031419	0.12989	0.999997	123	7	-0.41769	0.96356	0.98308	0.999997	1688	1	-0.41769
COPS8	15	0.031479	0.13006	0.999997	124	7	-0.26247	0.95596	0.98026	0.999997	1678	2	-0.26247
NonTargeting_Human_0028	1	0.03155	0.031672	0.792716	125	1	-0.90819	0.96845	0.96837	0.999997	1690	0	-0.90819
DNAJC13	15	0.032751	0.13437	0.999997	126	7	-0.14458	0.97021	0.98442	0.999997	1692	1	-0.14458
CTR9	15	0.033183	0.13577	0.999997	127	7	-0.45103	0.65651	0.86162	0.999997	1282	2	-0.45103
MRPS16	15	0.033246	0.13599	0.999997	128	7	-0.11671	0.57391	0.81091	0.999997	1147	4	-0.11671
SMNDC1	15	0.033991	0.13836	0.999997	129	4	-0.018704	0.21302	0.48766	0.999997	500	6	-0.018704
PITPNM2	15	0.034414	0.13967	0.999997	130	6	0.11128	0.076608	0.24974	0.999997	239	6	0.11128
RBM14	15	0.034646	0.14046	0.999997	131	8	-0.45055	0.018909	0.08732	0.901014	101	3	-0.45055
HSPE1	14	0.034938	0.13686	0.999997	132	4	-0.30473	0.17351	0.42579	0.999997	427	5	-0.30473
NonTargeting_Human_0823	1	0.035325	0.035476	0.851417	133	1	-1.1998	0.96468	0.9646	0.999997	1689	0	-1.1998
NSFL1C	15	0.036727	0.14736	0.999997	134	8	-0.44818	0.86085	0.95051	0.999997	1564	1	-0.44818
GZF1	15	0.036878	0.14781	0.999997	135	4	-0.25858	0.09801	0.2982	0.999997	290	4	-0.25858
TMEM134	15	0.037606	0.15015	0.999997	136	6	-0.11535	0.045229	0.17358	0.999997	178	6	-0.11535
NonTargeting_Human_0363	1	0.037622	0.037911	0.873962	137	1	-1.3011	0.96238	0.96236	0.999997	1686	0	-1.3011
NonTargeting_Human_0949	1	0.037704	0.038053	0.873962	138	1	-2.4228	0.9623	0.96226	0.999997	1685	0	-2.4228
NonTargeting_Human_0942	1	0.038361	0.038697	0.873962	139	1	-0.90919	0.96164	0.96163	0.999997	1684	0	-0.90919
POLR2L	15	0.038483	0.15296	0.999997	140	5	-0.041064	0.19521	0.46169	0.999997	462	3	-0.041064
NonTargeting_Human_0846	1	0.039838	0.040132	0.873962	141	1	-0.74852	0.96016	0.95991	0.999997	1682	0	-0.74852
NonTargeting_Human_0153	1	0.040658	0.040895	0.873962	142	1	-0.81238	0.95934	0.9591	0.999997	1681	0	-0.81238
UBE2G2	15	0.041099	0.16077	0.999997	143	7	-0.3004	0.073079	0.24143	0.999997	233	3	-0.3004
NonTargeting_Human_0556	1	0.041889	0.042263	0.873962	144	1	-1.3352	0.95811	0.95788	0.999997	1679	0	-1.3352
EIF2B4	15	0.044148	0.1687	0.999997	145	6	-0.099991	0.26083	0.55399	0.999997	604	3	-0.099991
SRP14	15	0.04432	0.16909	0.999997	146	6	-0.39031	0.085613	0.27038	0.999997	262	2	-0.39031
NELFB	15	0.044749	0.17017	0.999997	147	7	-0.33443	0.83249	0.93702	0.999997	1523	1	-0.33443
LIMS3	15	0.046191	0.17382	0.999997	148	4	-0.056862	0.53598	0.78827	0.999997	1090	4	-0.056862
ATP5O	15	0.046242	0.17393	0.999997	149	7	-0.47277	0.97344	0.98526	0.999997	1694	1	-0.47277
NonTargeting_Human_0079	1	0.046402	0.046886	0.922976	150	1	-0.89324	0.9536	0.95324	0.999997	1675	0	-0.89324
DHDDS	15	0.047253	0.17644	0.999997	151	6	-0.19224	0.26676	0.55988	0.999997	616	1	-0.19224
RUVBL1	15	0.047331	0.17662	0.999997	152	7	-0.51847	0.036303	0.14612	0.991804	151	5	-0.51847
NonTargeting_Human_0412	1	0.048699	0.049361	0.922976	153	1	-0.8038	0.9513	0.95099	0.999997	1672	0	-0.8038
PRMT1	15	0.049056	0.18083	0.999997	154	6	0.27087	0.20251	0.47206	0.999997	477	5	0.27087
NonTargeting_Human_0587	1	0.050751	0.051407	0.922976	155	1	-0.73593	0.94925	0.94892	0.999997	1668	0	-0.73593
MEF2B	15	0.051052	0.18601	0.999997	156	5	-0.28158	0.37296	0.66305	0.999997	800	3	-0.28158
NonTargeting_Human_0705	1	0.051161	0.051791	0.922976	157	1	-0.56205	0.94884	0.94851	0.999997	1667	0	-0.56205
GTPBP5	15	0.05121	0.18648	0.999997	158	4	-0.19427	0.51409	0.77515	0.999997	1053	3	-0.19427
NonTargeting_Human_0671	1	0.051243	0.051859	0.922976	159	1	-1.4676	0.94876	0.94844	0.999997	1666	0	-1.4676
NonTargeting_Human_0453	1	0.051325	0.051989	0.922976	160	1	-1.4843	0.94867	0.94835	0.999997	1665	0	-1.4843
NonTargeting_Human_0579	1	0.051653	0.052328	0.922976	161	1	-1.0721	0.94835	0.94806	0.999997	1664	0	-1.0721
VPS35	15	0.05192	0.18827	0.999997	162	6	0.04935	0.48968	0.76006	0.999997	1021	4	0.04935
NonTargeting_Human_0270	1	0.052146	0.052769	0.922976	163	1	-0.76659	0.94785	0.94751	0.999997	1663	0	-0.76659
CCT6A	15	0.05241	0.18959	0.999997	164	5	-0.43094	0.99742	0.99728	0.999997	1727	0	-0.43094
NonTargeting_Human_0100	1	0.052474	0.053029	0.922976	165	1	-1.3104	0.94753	0.94719	0.999997	1662	0	-1.3104
NonTargeting_Human_0315	1	0.053048	0.053492	0.922976	166	1	-0.83374	0.94695	0.94661	0.999997	1661	0	-0.83374
NonTargeting_Human_0012	1	0.053294	0.053735	0.922976	167	1	-1.3811	0.94671	0.94635	0.999997	1660	0	-1.3811
MSTO1	15	0.05336	0.19203	0.999997	168	7	-0.37466	0.47841	0.75322	0.999997	1001	2	-0.37466
HYPK	15	0.054085	0.19368	0.999997	169	5	0.53715	0.013001	0.065444	0.901014	88	9	0.53715
ATXN7L3	15	0.054711	0.19534	0.999997	170	5	-0.22309	0.98087	0.98721	0.999997	1704	1	-0.22309
NonTargeting_Human_0880	1	0.054936	0.055374	0.932047	171	1	-1.0288	0.94506	0.94471	0.999997	1658	0	-1.0288
GIGYF2	15	0.055472	0.19745	0.999997	172	6	0.086533	0.83171	0.93666	0.999997	1519	3	0.086533
DHX36	15	0.055521	0.19755	0.999997	173	7	-0.33945	0.081353	0.26049	0.999997	252	4	-0.33945
NonTargeting_Human_0847	1	0.055592	0.056091	0.932047	174	1	-0.8658	0.94441	0.94406	0.999997	1657	0	-0.8658
CPSF4	15	0.05652	0.20024	0.999997	175	7	-0.30314	0.9091	0.96339	0.999997	1622	1	-0.30314
NonTargeting_Human_0472	1	0.056659	0.057137	0.935551	176	1	-1.0783	0.94334	0.94294	0.999997	1656	0	-1.0783
PPIAL4A	15	0.056801	0.20089	0.999997	177	5	-0.16885	0.04019	0.15867	0.99379	163	6	-0.16885
PAM16	15	0.05767	0.20296	0.999997	178	7	-0.35778	0.99194	0.99224	0.999997	1713	1	-0.35778
LSM2	15	0.058687	0.2056	0.999997	179	5	-0.10869	0.45811	0.73981	0.999997	966	4	-0.10869
RCC1	15	0.059072	0.20666	0.999997	180	7	0.060705	0.7211	0.89135	0.999997	1379	2	0.060705
UBE2Q1	15	0.059694	0.20813	0.999997	181	7	-0.080046	0.87967	0.95552	0.999997	1584	1	-0.080046
GREB1L	15	0.060143	0.20938	0.999997	182	7	-0.28399	0.99689	0.99676	0.999997	1722	0	-0.28399
SEC13	15	0.060745	0.21094	0.999997	183	6	-0.34969	0.68001	0.87536	0.999997	1324	3	-0.34969
AQP10	15	0.06129	0.21217	0.999997	184	4	-0.41792	0.68379	0.87776	0.999997	1331	3	-0.41792
GTF2H3	15	0.061429	0.21255	0.999997	185	7	-0.36707	0.63244	0.84707	0.999997	1238	3	-0.36707
SMC1A	15	0.061524	0.21279	0.999997	186	7	-0.18348	0.9741	0.98539	0.999997	1695	1	-0.18348
NonTargeting_Human_0617	1	0.064454	0.065049	0.999997	187	1	-0.65117	0.93555	0.9353	0.999997	1650	0	-0.65117
OTC	14	0.06447	0.21877	0.999997	188	7	-0.23995	0.84653	0.93883	0.999997	1544	2	-0.23995
VPS72	15	0.065946	0.22323	0.999997	189	6	-0.23402	0.015037	0.073294	0.901014	92	5	-0.23402
NonTargeting_Human_0171	1	0.066423	0.067134	0.999997	190	1	-0.75746	0.93358	0.93345	0.999997	1648	0	-0.75746
ATP11A	15	0.067899	0.22805	0.999997	191	6	-0.19834	0.99955	0.99957	0.999997	1739	0	-0.19834
MDH1	15	0.068537	0.22945	0.999997	192	6	0.11105	0.36949	0.65983	0.999997	797	5	0.11105
NonTargeting_Human_0625	1	0.068639	0.069135	0.999997	193	1	-1.0653	0.93136	0.93132	0.999997	1647	0	-1.0653
FDX1L	15	0.069292	0.23119	0.999997	194	7	-0.0038211	0.43109	0.71613	0.999997	907	5	-0.0038211
EXOC3	15	0.069395	0.23148	0.999997	195	7	-0.41758	0.64009	0.85189	0.999997	1255	2	-0.41758
HSD17B10	15	0.069485	0.2317	0.999997	196	6	-0.18696	0.86632	0.95216	0.999997	1574	2	-0.18696
WARS	15	0.069668	0.23216	0.999997	197	5	-0.23103	0.54572	0.79424	0.999997	1111	3	-0.23103
SPRN	15	0.070542	0.23433	0.999997	198	7	-0.076765	0.07537	0.24676	0.999997	237	4	-0.076765
METTL14	15	0.070857	0.23502	0.999997	199	4	-0.07125	0.17323	0.42911	0.999997	425	3	-0.07125
TMEM30B	15	0.071408	0.23619	0.999997	200	4	0.16625	0.62384	0.84192	0.999997	1223	3	0.16625
NonTargeting_Human_0042	1	0.071839	0.072525	0.999997	201	1	-1.2647	0.92816	0.92823	0.999997	1644	0	-1.2647
NonTargeting_Human_0842	1	0.072003	0.07265	0.999997	202	1	-0.83094	0.928	0.92806	0.999997	1643	0	-0.83094
NonTargeting_Human_0142	1	0.073562	0.074272	0.999997	203	1	-0.73087	0.92644	0.92663	0.999997	1642	0	-0.73087
STARD4	15	0.073566	0.24137	0.999997	204	5	-0.095286	0.14381	0.38287	0.999997	371	3	-0.095286
USP39	15	0.073631	0.24155	0.999997	205	5	-0.32641	0.16303	0.41343	0.999997	410	4	-0.32641
NonTargeting_Human_0904	1	0.074383	0.075102	0.999997	206	1	-1.0126	0.92562	0.92585	0.999997	1641	0	-1.0126
TBC1D22A	15	0.074384	0.24324	0.999997	207	7	-0.15629	0.29991	0.5924	0.999997	679	3	-0.15629
ADAMTSL1	15	0.074663	0.24395	0.999997	208	5	-0.0078289	0.53816	0.7898	0.999997	1094	2	-0.0078289
NonTargeting_Human_0312	1	0.075285	0.075995	0.999997	209	1	-1.6635	0.92471	0.92504	0.999997	1639	0	-1.6635
NonTargeting_Human_0214	1	0.075613	0.076391	0.999997	210	1	-0.77172	0.92439	0.92467	0.999997	1638	0	-0.77172
NonTargeting_Human_0257	1	0.076024	0.076849	0.999997	211	1	-1.7675	0.92398	0.92433	0.999997	1637	0	-1.7675
ASH2L	15	0.07721	0.24999	0.999997	212	5	-0.13067	0.71053	0.88745	0.999997	1369	2	-0.13067
NonTargeting_Human_0395	1	0.077665	0.078589	0.999997	213	1	-0.68762	0.92234	0.92254	0.999997	1635	0	-0.68762
GPR52	15	0.078025	0.25183	0.999997	214	7	-0.14846	0.80663	0.92555	0.999997	1476	2	-0.14846
ZNF646	15	0.078812	0.25381	0.999997	215	7	-0.17372	0.4099	0.6968	0.999997	873	4	-0.17372
NonTargeting_Human_0957	1	0.079142	0.079985	0.999997	216	1	-1.287	0.92086	0.92113	0.999997	1634	0	-1.287
CSNK1A1	15	0.079315	0.25496	0.999997	217	6	-0.25249	0.30682	0.59927	0.999997	695	2	-0.25249
NonTargeting_Human_0232	1	0.080619	0.081533	0.999997	218	1	-0.79752	0.91938	0.91971	0.999997	1633	0	-0.79752
HNRNPU	15	0.081126	0.25901	0.999997	219	6	-0.18974	0.071932	0.23877	0.999997	231	2	-0.18974
NonTargeting_Human_0962	1	0.081932	0.082969	0.999997	220	1	-0.76736	0.91807	0.91831	0.999997	1632	0	-0.76736
RHOT2	15	0.082361	0.26188	0.999997	221	7	-0.19862	0.67171	0.87046	0.999997	1308	4	-0.19862
FAM21A	15	0.082943	0.26308	0.999997	222	7	-0.10724	0.16798	0.4214	0.999997	418	4	-0.10724
INTS1	15	0.083618	0.26474	0.999997	223	6	-0.29482	0.95069	0.97787	0.999997	1671	1	-0.29482
NXF5	15	0.084115	0.26594	0.999997	224	7	-0.35797	0.66375	0.86572	0.999997	1295	3	-0.35797
SIN3B	15	0.084399	0.26657	0.999997	225	6	-0.26031	0.99263	0.99274	0.999997	1715	1	-0.26031
NonTargeting_Human_0421	1	0.085214	0.086083	0.999997	226	1	-0.68933	0.91479	0.91512	0.999997	1627	0	-0.68933
ZBTB8OS	15	0.085535	0.26934	0.999997	227	7	-0.38314	0.64369	0.85409	0.999997	1262	3	-0.38314
NonTargeting_Human_0360	1	0.085788	0.086603	0.999997	228	1	-0.8437	0.91421	0.91448	0.999997	1626	0	-0.8437
ARL8A	15	0.086202	0.27086	0.999997	229	4	-0.16414	0.95032	0.97771	0.999997	1670	1	-0.16414
TSPAN11	15	0.086814	0.27223	0.999997	230	5	0.048244	0.45166	0.73411	0.999997	952	5	0.048244
NELFA	15	0.08943	0.27821	0.999997	231	7	-0.18549	0.3202	0.61239	0.999997	720	5	-0.18549
MCCC2	15	0.090131	0.27982	0.999997	232	4	0.11326	0.40775	0.69481	0.999997	872	3	0.11326
NonTargeting_Human_0158	1	0.090219	0.090892	0.999997	233	1	-0.74678	0.90978	0.91013	0.999997	1625	0	-0.74678
NonTargeting_Human_0183	1	0.090301	0.090982	0.999997	234	1	-0.65804	0.9097	0.91005	0.999997	1624	0	-0.65804
ANAPC16	15	0.091379	0.28279	0.999997	235	4	-0.11797	0.80916	0.92666	0.999997	1482	3	-0.11797
NonTargeting_Human_0836	1	0.091696	0.092446	0.999997	236	1	-1.5968	0.9083	0.90868	0.999997	1620	0	-1.5968
NonTargeting_Human_0870	1	0.091778	0.092508	0.999997	237	1	-0.88983	0.90822	0.90861	0.999997	1619	0	-0.88983
NonTargeting_Human_0128	1	0.092763	0.093458	0.999997	238	1	-0.80631	0.90724	0.90759	0.999997	1618	0	-0.80631
NonTargeting_Human_0126	1	0.092845	0.093531	0.999997	239	1	-1.0286	0.90716	0.90755	0.999997	1617	0	-1.0286
NonTargeting_Human_0733	1	0.09424	0.095091	0.999997	240	1	-0.91356	0.90576	0.9061	0.999997	1616	0	-0.91356
NonTargeting_Human_0818	1	0.09506	0.095978	0.999997	241	1	-0.92897	0.90494	0.90535	0.999997	1615	0	-0.92897
MED9	15	0.095545	0.29198	0.999997	242	6	-0.24725	0.6781	0.87425	0.999997	1319	3	-0.24725
hsa-mir-1908	15	0.096036	0.29307	0.999997	243	3	-0.15873	0.90276	0.96156	0.999997	1614	2	-0.15873
TBXAS1	15	0.097598	0.29682	0.999997	244	6	-0.089415	0.18921	0.45289	0.999997	455	6	-0.089415
NonTargeting_Human_0344	1	0.097932	0.098775	0.999997	245	1	-0.79287	0.90207	0.90255	0.999997	1613	0	-0.79287
NonTargeting_Human_0351	1	0.098589	0.099567	0.999997	246	1	-1.0495	0.90141	0.90191	0.999997	1612	0	-1.0495
NonTargeting_Human_0798	1	0.098999	0.099962	0.999997	247	1	-0.64839	0.901	0.90154	0.999997	1611	0	-0.64839
NOMO1	15	0.099019	0.29996	0.999997	248	7	-0.045684	0.31927	0.61163	0.999997	719	4	-0.045684
EWSR1	15	0.099227	0.30046	0.999997	249	6	-0.20512	0.83831	0.93976	0.999997	1529	2	-0.20512
GSK3B	15	0.099466	0.30101	0.999997	250	5	0.10045	0.51023	0.77281	0.999997	1050	4	0.10045
NonTargeting_Human_0031	1	0.099984	0.10105	0.999997	251	1	-1.0371	0.90002	0.90047	0.999997	1610	0	-1.0371
NonTargeting_Human_0541	1	0.10015	0.10122	0.999997	252	1	-0.70323	0.89985	0.90028	0.999997	1609	0	-0.70323
NonTargeting_Human_0119	1	0.10031	0.10142	0.999997	253	1	-0.50458	0.89969	0.90008	0.999997	1608	0	-0.50458
NonTargeting_Human_0111	1	0.10064	0.10186	0.999997	254	1	-0.60193	0.89936	0.89968	0.999997	1607	0	-0.60193
NonTargeting_Human_0764	1	0.10154	0.10273	0.999997	255	1	-0.44979	0.89846	0.89871	0.999997	1606	0	-0.44979
SLC7A6OS	15	0.10219	0.3067	0.999997	256	7	-0.21541	0.4752	0.75129	0.999997	993	4	-0.21541
PSMD5	15	0.10242	0.30722	0.999997	257	7	-0.17886	0.46611	0.74552	0.999997	974	4	-0.17886
NonTargeting_Human_0695	1	0.1031	0.10427	0.999997	258	1	-0.84981	0.8969	0.89718	0.999997	1605	0	-0.84981
IREB2	15	0.10323	0.30902	0.999997	259	5	-0.40373	0.38122	0.67057	0.999997	821	3	-0.40373
WDR33	15	0.10356	0.30978	0.999997	260	3	0.29448	0.12751	0.35685	0.999997	351	6	0.29448
NonTargeting_Human_0724	1	0.10491	0.10608	0.999997	261	1	-1.7157	0.89509	0.89538	0.999997	1602	0	-1.7157
NonTargeting_Human_0877	1	0.10614	0.10731	0.999997	262	1	-0.8063	0.89386	0.89415	0.999997	1600	0	-0.8063
POLR3H	15	0.10672	0.31653	0.999997	263	7	-0.45238	0.32271	0.61475	0.999997	725	3	-0.45238
CCT8	15	0.10689	0.31694	0.999997	264	6	-0.33233	0.2933	0.58595	0.999997	665	5	-0.33233
NonTargeting_Human_0561	1	0.10729	0.10851	0.999997	265	1	-0.78014	0.89271	0.89296	0.999997	1598	0	-0.78014
NonTargeting_Human_0956	1	0.10786	0.10911	0.999997	266	1	-0.98413	0.89214	0.89239	0.999997	1597	0	-0.98413
NonTargeting_Human_0866	1	0.10844	0.10971	0.999997	267	1	-1.5683	0.89156	0.89182	0.999997	1596	0	-1.5683
CACNA1A	15	0.10918	0.32166	0.999997	268	3	0.012988	0.82991	0.93583	0.999997	1515	2	0.012988
NonTargeting_Human_0599	1	0.10934	0.11078	0.999997	269	1	-0.63643	0.89066	0.8908	0.999997	1595	0	-0.63643
NonTargeting_Human_0197	1	0.10991	0.11133	0.999997	270	1	-0.91121	0.89009	0.89025	0.999997	1594	0	-0.91121
GFER	15	0.11106	0.32515	0.999997	271	5	-0.12325	0.81778	0.93058	0.999997	1492	3	-0.12325
HIST2H2BF	15	0.11131	0.32551	0.999997	272	6	-0.33462	0.50388	0.76876	0.999997	1042	2	-0.33462
EEFSEC	15	0.11148	0.32577	0.999997	273	4	-0.22765	0.82556	0.9338	0.999997	1505	3	-0.22765
NonTargeting_Human_0032	1	0.11344	0.11469	0.999997	274	1	-0.65381	0.88656	0.8868	0.999997	1593	0	-0.65381
PQBP1	15	0.11349	0.3291	0.999997	275	6	0.13021	0.10918	0.3218	0.999997	315	6	0.13021
NonTargeting_Human_0292	1	0.1141	0.11532	0.999997	276	1	-0.87796	0.8859	0.88607	0.999997	1592	0	-0.87796
EXOC2	15	0.11539	0.33226	0.999997	277	6	-0.30115	0.79106	0.91891	0.999997	1454	3	-0.30115
NonTargeting_Human_0706	1	0.11541	0.1166	0.999997	278	1	-0.76177	0.88459	0.88452	0.999997	1591	0	-0.76177
COPS6	14	0.11602	0.32507	0.999997	279	6	-0.23899	0.84007	0.93713	0.999997	1533	2	-0.23899
FBXL5	15	0.11649	0.33426	0.999997	280	5	0.19475	0.078058	0.25301	0.999997	245	6	0.19475
TMEM221	15	0.11665	0.33446	0.999997	281	4	-0.019151	0.22999	0.51159	0.999997	540	4	-0.019151
PGM1	15	0.11709	0.33524	0.999997	282	5	-0.10456	0.38034	0.66973	0.999997	818	3	-0.10456
NonTargeting_Human_0291	1	0.1173	0.1185	0.999997	283	1	-0.63393	0.8827	0.88266	0.999997	1590	0	-0.63393
NonTargeting_Human_0077	1	0.11754	0.11875	0.999997	284	1	-0.44415	0.88246	0.88242	0.999997	1589	0	-0.44415
NonTargeting_Human_0635	1	0.11779	0.11905	0.999997	285	1	-1.3009	0.88221	0.88221	0.999997	1588	0	-1.3009
NonTargeting_Human_0966	1	0.1182	0.11943	0.999997	286	1	-0.98285	0.8818	0.88175	0.999997	1586	0	-0.98285
MED27	15	0.11871	0.338	0.999997	287	6	-0.42911	0.34544	0.63657	0.999997	764	3	-0.42911
GNB2L1	15	0.11912	0.33867	0.999997	288	6	-0.28666	0.8327	0.93714	0.999997	1524	3	-0.28666
NonTargeting_Human_0860	1	0.11968	0.12093	0.999997	289	1	-0.89589	0.88032	0.88015	0.999997	1585	0	-0.89589
NOP16	15	0.12009	0.34034	0.999997	290	3	0.62319	0.0063247	0.035216	0.739922	64	8	0.62319
EXOC7	15	0.12079	0.34151	0.999997	291	6	-0.27135	0.15545	0.40142	0.999997	392	3	-0.27135
NonTargeting_Human_0887	1	0.12115	0.12232	0.999997	292	1	-0.64038	0.87885	0.87861	0.999997	1583	0	-0.64038
NonTargeting_Human_0115	1	0.12181	0.12295	0.999997	293	1	-0.71885	0.87819	0.8779	0.999997	1582	0	-0.71885
WDR61	15	0.12307	0.34557	0.999997	294	6	-0.29002	0.90966	0.96356	0.999997	1623	2	-0.29002
hsa-mir-6817	13	0.12309	0.33472	0.999997	295	5	0.018539	0.65759	0.84461	0.999997	1285	3	0.018539
URI1	15	0.1236	0.34648	0.999997	296	5	-0.062065	0.28766	0.58088	0.999997	653	5	-0.062065
NonTargeting_Human_0485	1	0.1237	0.12492	0.999997	297	1	-0.97468	0.8763	0.87604	0.999997	1579	0	-0.97468
IL17RA	15	0.12408	0.34727	0.999997	298	5	-0.13548	0.80668	0.92555	0.999997	1478	3	-0.13548
LONP1	15	0.12427	0.34758	0.999997	299	6	-0.27335	0.53301	0.78631	0.999997	1087	4	-0.27335
SAP130	15	0.12503	0.34879	0.999997	300	6	-0.040184	0.077655	0.25212	0.999997	244	3	-0.040184
NonTargeting_Human_0396	1	0.12509	0.12626	0.999997	301	1	-0.51777	0.87491	0.87474	0.999997	1578	0	-0.51777
SSR2	15	0.12743	0.35291	0.999997	302	6	-0.1786	0.71808	0.89027	0.999997	1376	3	-0.1786
STX4	15	0.12757	0.35316	0.999997	303	4	0.018739	0.67703	0.87362	0.999997	1316	3	0.018739
NonTargeting_Human_0620	1	0.12809	0.12904	0.999997	304	1	-1.2551	0.87191	0.87175	0.999997	1577	0	-1.2551
BRICD5	15	0.1291	0.35586	0.999997	305	5	0.015341	0.97302	0.98515	0.999997	1693	1	0.015341
ANO8	15	0.13052	0.35846	0.999997	306	6	-0.18223	0.39551	0.68362	0.999997	856	4	-0.18223
NonTargeting_Human_0417	1	0.13207	0.13316	0.999997	307	1	-0.75996	0.86793	0.8679	0.999997	1575	0	-0.75996
OR5AR1	15	0.13311	0.36286	0.999997	308	5	0.012274	0.70849	0.88664	0.999997	1367	3	0.012274
DENND4A	15	0.13325	0.36311	0.999997	309	5	0.00099585	0.5512	0.79743	0.999997	1117	3	0.00099585
NonTargeting_Human_0882	1	0.13428	0.13532	0.999997	310	1	-1.3926	0.86572	0.86574	0.999997	1573	0	-1.3926
NonTargeting_Human_0813	1	0.13494	0.1359	0.999997	311	1	-0.93144	0.86506	0.86506	0.999997	1572	0	-0.93144
UXT	15	0.13526	0.36618	0.999997	312	6	-0.31944	0.55153	0.79755	0.999997	1119	4	-0.31944
NonTargeting_Human_0088	1	0.13551	0.13659	0.999997	313	1	-0.58029	0.86449	0.8646	0.999997	1570	0	-0.58029
NonTargeting_Human_0652	1	0.13576	0.13685	0.999997	314	1	-0.69991	0.86424	0.86438	0.999997	1569	0	-0.69991
NonTargeting_Human_0771	1	0.13625	0.13729	0.999997	315	1	-1.454	0.86375	0.86385	0.999997	1568	0	-1.454
NonTargeting_Human_0546	1	0.13633	0.13734	0.999997	316	1	-0.55243	0.86367	0.86376	0.999997	1567	0	-0.55243
NR2C2AP	15	0.13728	0.36949	0.999997	317	5	-0.061948	0.42833	0.71357	0.999997	901	3	-0.061948
NonTargeting_Human_0361	1	0.13789	0.13892	0.999997	318	1	-0.53192	0.86211	0.86214	0.999997	1565	0	-0.53192
ARFRP1	15	0.13826	0.37094	0.999997	319	6	-0.29448	0.99669	0.99654	0.999997	1720	0	-0.29448
WDR55	15	0.13848	0.37131	0.999997	320	3	0.17046	0.45524	0.73717	0.999997	962	3	0.17046
GART	15	0.13928	0.37253	0.999997	321	4	-0.10426	0.83775	0.93952	0.999997	1527	3	-0.10426
NonTargeting_Human_0719	1	0.13978	0.14085	0.999997	322	1	-0.57653	0.86022	0.86029	0.999997	1562	0	-0.57653
ZNRF3	15	0.14067	0.37474	0.999997	323	6	-0.16608	0.22154	0.49969	0.999997	516	6	-0.16608
NonTargeting_Human_0708	1	0.14126	0.14244	0.999997	324	1	-0.7075	0.85874	0.85884	0.999997	1561	0	-0.7075
NonTargeting_Human_0920	1	0.14142	0.14254	0.999997	325	1	-0.7785	0.85858	0.85869	0.999997	1560	0	-0.7785
PPP1CB	15	0.14168	0.37643	0.999997	326	3	0.14085	0.62414	0.84209	0.999997	1224	4	0.14085
CEBPZ	15	0.14192	0.37678	0.999997	327	5	0.19341	0.61285	0.83531	0.999997	1200	4	0.19341
NonTargeting_Human_0627	1	0.14232	0.14353	0.999997	328	1	-0.71475	0.85768	0.85779	0.999997	1559	0	-0.71475
FNDC3B	15	0.14284	0.37804	0.999997	329	6	-0.10664	0.99781	0.9976	0.999997	1728	0	-0.10664
FAM126A	15	0.14331	0.37876	0.999997	330	6	-0.37554	0.25	0.5394	0.999997	586	3	-0.37554
ATP6V1B1	15	0.14367	0.37941	0.999997	331	6	-0.0012133	0.39458	0.68279	0.999997	853	4	-0.0012133
EIF2S2	15	0.14381	0.37962	0.999997	332	5	0.072876	0.67399	0.87188	0.999997	1311	4	0.072876
NonTargeting_Human_0107	1	0.14495	0.14599	0.999997	333	1	-0.42644	0.85505	0.85485	0.999997	1558	0	-0.42644
NonTargeting_Human_0147	1	0.14503	0.14604	0.999997	334	1	-0.85571	0.85497	0.85475	0.999997	1557	0	-0.85571
POLR2C	15	0.14535	0.38189	0.999997	335	4	0.10125	0.32614	0.6182	0.999997	733	4	0.10125
NonTargeting_Human_0584	1	0.14536	0.1463	0.999997	336	1	-1.3175	0.85464	0.85444	0.999997	1555	0	-1.3175
NonTargeting_Human_0741	1	0.14577	0.14668	0.999997	337	1	-0.51543	0.85423	0.85399	0.999997	1554	0	-0.51543
UVRAG	15	0.14679	0.38428	0.999997	338	6	-0.28452	0.10134	0.30522	0.999997	300	2	-0.28452
NonTargeting_Human_0484	1	0.14717	0.14804	0.999997	339	1	-0.58317	0.85283	0.85268	0.999997	1553	0	-0.58317
NonTargeting_Human_0570	1	0.14749	0.14839	0.999997	340	1	-0.81481	0.85251	0.85238	0.999997	1552	0	-0.81481
OR52B2	15	0.14795	0.38626	0.999997	341	5	0.2975	0.019755	0.090451	0.901014	106	8	0.2975
NonTargeting_Human_0252	1	0.14938	0.1502	0.999997	342	1	-0.44968	0.85062	0.85045	0.999997	1550	0	-0.44968
NonTargeting_Human_0857	1	0.14995	0.15078	0.999997	343	1	-0.83693	0.85005	0.85	0.999997	1549	0	-0.83693
NonTargeting_Human_0812	1	0.15217	0.15292	0.999997	344	1	-0.95442	0.84783	0.84788	0.999997	1547	0	-0.95442
NonTargeting_Human_0026	1	0.15365	0.15435	0.999997	345	1	-0.74727	0.84635	0.84639	0.999997	1543	0	-0.74727
NonTargeting_Human_0547	1	0.15381	0.15454	0.999997	346	1	-1.1851	0.84619	0.84623	0.999997	1542	0	-1.1851
BST2	15	0.15398	0.39599	0.999997	347	6	-0.13633	0.48837	0.75924	0.999997	1018	3	-0.13633
MORC3	15	0.15419	0.39632	0.999997	348	5	0.15856	0.55626	0.80028	0.999997	1123	4	0.15856
GDI2	15	0.1549	0.39748	0.999997	349	6	0.24757	0.055729	0.19979	0.999997	194	6	0.24757
NonTargeting_Human_0151	1	0.15693	0.15742	0.999997	350	1	-0.58852	0.84307	0.84316	0.999997	1540	0	-0.58852
NonTargeting_Human_0797	1	0.15718	0.15767	0.999997	351	1	-0.66138	0.84282	0.84292	0.999997	1539	0	-0.66138
NonTargeting_Human_0953	1	0.158	0.15859	0.999997	352	1	-0.91744	0.842	0.84208	0.999997	1538	0	-0.91744
NonTargeting_Human_0235	1	0.15824	0.15887	0.999997	353	1	-0.50018	0.84176	0.84177	0.999997	1537	0	-0.50018
EXT1	15	0.15829	0.40314	0.999997	354	6	-0.30306	0.93776	0.97293	0.999997	1652	1	-0.30306
NonTargeting_Human_0194	1	0.15865	0.15928	0.999997	355	1	-0.77796	0.84135	0.84141	0.999997	1536	0	-0.77796
RAB23	15	0.15965	0.40538	0.999997	356	3	0.095796	0.2615	0.55466	0.999997	607	5	0.095796
CHRNA3	15	0.15975	0.40557	0.999997	357	6	-0.11327	0.062104	0.21584	0.999997	205	4	-0.11327
GCFC2	15	0.16004	0.406	0.999997	358	4	-0.12395	0.7826	0.91546	0.999997	1442	3	-0.12395
NonTargeting_Human_1000	1	0.16021	0.16079	0.999997	359	1	-0.58891	0.83979	0.83975	0.999997	1532	0	-0.58891
NonTargeting_Human_0985	1	0.16029	0.16085	0.999997	360	1	-0.86262	0.83971	0.83967	0.999997	1531	0	-0.86262
NonTargeting_Human_0434	1	0.16161	0.16219	0.999997	361	1	-0.65836	0.83839	0.83829	0.999997	1530	0	-0.65836
SREBF1	15	0.16258	0.40999	0.999997	362	6	-0.25896	0.87144	0.95343	0.999997	1576	2	-0.25896
ASB16	15	0.16315	0.41096	0.999997	363	6	-0.13205	0.019641	0.090005	0.901014	103	3	-0.13205
NonTargeting_Human_0787	1	0.16333	0.16386	0.999997	364	1	-0.84234	0.83667	0.83647	0.999997	1526	0	-0.84234
RNF151	15	0.16548	0.4149	0.999997	365	4	0.0046429	0.14237	0.38076	0.999997	369	5	0.0046429
NonTargeting_Human_0465	1	0.16661	0.16709	0.999997	366	1	-0.57522	0.83339	0.83305	0.999997	1525	0	-0.57522
MLLT11	15	0.16705	0.41753	0.999997	367	4	0.04731	0.43506	0.71983	0.999997	914	5	0.04731
INSR	15	0.16755	0.41821	0.999997	368	6	-0.24551	0.93832	0.97313	0.999997	1653	2	-0.24551
NonTargeting_Human_0150	1	0.16768	0.1681	0.999997	369	1	-0.4486	0.83232	0.83209	0.999997	1522	0	-0.4486
CSNK2A2	15	0.1682	0.41926	0.999997	370	5	-0.2842	0.95448	0.97948	0.999997	1676	1	-0.2842
NonTargeting_Human_0563	1	0.16825	0.16877	0.999997	371	1	-0.59731	0.83175	0.8315	0.999997	1520	0	-0.59731
NonTargeting_Human_0424	1	0.16957	0.17002	0.999997	372	1	-0.75699	0.83043	0.83017	0.999997	1517	0	-0.75699
GATS	15	0.16987	0.42178	0.999997	373	6	-0.19972	0.80242	0.92377	0.999997	1472	3	-0.19972
LACRT	15	0.17005	0.42209	0.999997	374	2	0.30513	0.12463	0.35203	0.999997	348	6	0.30513
NonTargeting_Human_0383	1	0.17006	0.17044	0.999997	375	1	-0.57061	0.82994	0.82969	0.999997	1516	0	-0.57061
NonTargeting_Human_0729	1	0.17104	0.17138	0.999997	376	1	-0.53066	0.82896	0.82867	0.999997	1514	0	-0.53066
NonTargeting_Human_0631	1	0.17145	0.17182	0.999997	377	1	-0.52451	0.82855	0.82832	0.999997	1513	0	-0.52451
POLR1B	15	0.17168	0.42449	0.999997	378	3	0.16471	0.15598	0.40217	0.999997	395	4	0.16471
NonTargeting_Human_0675	1	0.17178	0.17219	0.999997	379	1	-0.5396	0.82822	0.82804	0.999997	1512	0	-0.5396
WWP1	15	0.1724	0.42558	0.999997	380	6	-0.29257	0.98966	0.99072	0.999997	1711	1	-0.29257
NonTargeting_Human_0935	1	0.17268	0.17311	0.999997	381	1	-0.7009	0.82732	0.82702	0.999997	1510	0	-0.7009
NonTargeting_Human_0278	1	0.17301	0.17346	0.999997	382	1	-0.52939	0.82699	0.82669	0.999997	1509	0	-0.52939
NonTargeting_Human_0826	1	0.17309	0.17354	0.999997	383	1	-0.56198	0.82691	0.8266	0.999997	1508	0	-0.56198
RPL17	14	0.17325	0.42472	0.999997	384	4	0.17064	0.018035	0.081793	0.901014	99	7	0.17064
NonTargeting_Human_0120	1	0.17359	0.17401	0.999997	385	1	-0.42937	0.82641	0.82624	0.999997	1507	0	-0.42937
SLC35A2	15	0.17368	0.42748	0.999997	386	3	-0.040049	0.36697	0.65738	0.999997	791	5	-0.040049
C2orf49	15	0.17418	0.42828	0.999997	387	5	-0.34239	0.22729	0.50798	0.999997	535	3	-0.34239
NonTargeting_Human_0511	1	0.17449	0.17499	0.999997	388	1	-0.66852	0.82551	0.82542	0.999997	1504	0	-0.66852
SNX1	15	0.17554	0.43037	0.999997	389	6	-0.026782	0.35915	0.65002	0.999997	777	5	-0.026782
NonTargeting_Human_0454	1	0.17703	0.17742	0.999997	390	1	-0.56969	0.82297	0.82273	0.999997	1503	0	-0.56969
ZNF263	15	0.17741	0.43331	0.999997	391	5	-0.096792	0.65672	0.86169	0.999997	1283	3	-0.096792
NonTargeting_Human_0851	1	0.17777	0.17813	0.999997	392	1	-0.73353	0.82223	0.82199	0.999997	1501	0	-0.73353
ERCC3	15	0.17847	0.43499	0.999997	393	6	-0.48491	0.93929	0.97343	0.999997	1654	2	-0.48491
MRPS31	15	0.17961	0.43661	0.999997	394	6	-0.13063	0.29176	0.58452	0.999997	660	4	-0.13063
NonTargeting_Human_0381	1	0.18138	0.18139	0.999997	395	1	-0.6498	0.81862	0.81844	0.999997	1497	0	-0.6498
NonTargeting_Human_0915	1	0.18163	0.1816	0.999997	396	1	-0.53073	0.81837	0.81824	0.999997	1496	0	-0.53073
NonTargeting_Human_0159	1	0.18179	0.1818	0.999997	397	1	-0.679	0.81821	0.81809	0.999997	1495	0	-0.679
NonTargeting_Human_0345	1	0.18196	0.18198	0.999997	398	1	-0.6469	0.81804	0.81794	0.999997	1494	0	-0.6469
NonTargeting_Human_0336	1	0.18212	0.18209	0.999997	399	1	-0.96933	0.81788	0.81777	0.999997	1493	0	-0.96933
MKL1	15	0.18249	0.44112	0.999997	400	6	-0.17258	0.19151	0.45617	0.999997	460	4	-0.17258
RPS8	15	0.18304	0.44194	0.999997	401	5	0.11786	0.040448	0.15945	0.99379	164	4	0.11786
NonTargeting_Human_0481	1	0.18319	0.18317	0.999997	402	1	-0.49184	0.81681	0.81669	0.999997	1491	0	-0.49184
NonTargeting_Human_0230	1	0.18352	0.18341	0.999997	403	1	-0.63305	0.81648	0.81638	0.999997	1490	0	-0.63305
RPP38	15	0.18543	0.44558	0.999997	404	3	-0.28319	0.52557	0.78192	0.999997	1071	4	-0.28319
BAGE2	15	0.18558	0.44581	0.999997	405	5	-0.1409	0.94523	0.97558	0.999997	1659	1	-0.1409
NonTargeting_Human_0113	1	0.18573	0.18549	0.999997	406	1	-0.488	0.81427	0.81422	0.999997	1488	0	-0.488
MOCS3	15	0.18822	0.44959	0.999997	407	6	-0.29613	0.4102	0.69702	0.999997	875	1	-0.29613
ITGA1	15	0.18844	0.44996	0.999997	408	4	0.26261	0.047892	0.18001	0.999997	182	7	0.26261
NonTargeting_Human_0875	1	0.18926	0.18916	0.999997	409	1	-0.50401	0.81074	0.81071	0.999997	1484	0	-0.50401
KIAA1033	15	0.18949	0.45151	0.999997	410	2	0.70235	0.0031947	0.019991	0.54326	54	8	0.70235
ALG14	15	0.19003	0.45229	0.999997	411	6	-0.049787	0.53214	0.78578	0.999997	1084	4	-0.049787
NonTargeting_Human_0220	1	0.19057	0.1904	0.999997	412	1	-0.48724	0.80943	0.80945	0.999997	1483	0	-0.48724
NonTargeting_Human_0208	1	0.19098	0.19078	0.999997	413	1	-0.68107	0.80902	0.80905	0.999997	1481	0	-0.68107
NonTargeting_Human_0277	1	0.19238	0.19226	0.999997	414	1	-0.43358	0.80762	0.80792	0.999997	1480	0	-0.43358
AGPAT1	15	0.19252	0.45604	0.999997	415	3	0.59391	0.00015446	0.0013083	0.095916	23	8	0.59391
NonTargeting_Human_0243	1	0.19271	0.1925	0.999997	416	1	-0.5739	0.80729	0.80757	0.999997	1479	0	-0.5739
SOCS1	15	0.19295	0.45673	0.999997	417	4	-0.0068562	0.28407	0.57733	0.999997	647	3	-0.0068562
NonTargeting_Human_0352	1	0.19336	0.19322	0.999997	418	1	-0.40425	0.80664	0.80697	0.999997	1477	0	-0.40425
NonTargeting_Human_0437	1	0.19385	0.19369	0.999997	419	1	-0.52371	0.80615	0.80651	0.999997	1475	0	-0.52371
CCL14	15	0.19457	0.45899	0.999997	420	6	0.0059776	0.29303	0.58572	0.999997	664	4	0.0059776
IRS4	15	0.19467	0.45917	0.999997	421	6	-0.18929	0.22779	0.50865	0.999997	536	3	-0.18929
WDR82	15	0.19478	0.45934	0.999997	422	6	-0.4236	0.097988	0.29815	0.999997	289	4	-0.4236
TNFAIP3	15	0.19684	0.46252	0.999997	423	4	0.25873	0.11262	0.32927	0.999997	321	6	0.25873
CMAS	15	0.19685	0.46253	0.999997	424	6	-0.25919	0.12954	0.36041	0.999997	354	4	-0.25919
NonTargeting_Human_0317	1	0.19697	0.19671	0.999997	425	1	-0.43578	0.80303	0.80345	0.999997	1474	0	-0.43578
EIF3C	13	0.19699	0.44582	0.999997	426	5	-0.31858	0.20145	0.45491	0.999997	475	4	-0.31858
NonTargeting_Human_0936	1	0.19755	0.19724	0.999997	427	1	-0.53445	0.80245	0.80303	0.999997	1473	0	-0.53445
NonTargeting_Human_0324	1	0.1982	0.19795	0.999997	428	1	-0.88791	0.8018	0.80235	0.999997	1471	0	-0.88791
ELP3	15	0.19996	0.46724	0.999997	429	5	-0.30045	0.083604	0.26561	0.999997	258	4	-0.30045
FRY	15	0.2002	0.46753	0.999997	430	4	-0.10816	0.27798	0.57114	0.999997	634	5	-0.10816
NonTargeting_Human_0758	1	0.20124	0.20107	0.999997	431	1	-0.52654	0.79876	0.79928	0.999997	1468	0	-0.52654
NonTargeting_Human_0493	1	0.2014	0.20121	0.999997	432	1	-0.75232	0.7986	0.79915	0.999997	1467	0	-0.75232
NonTargeting_Human_0058	1	0.20239	0.20215	0.999997	433	1	-0.45917	0.79761	0.79821	0.999997	1466	0	-0.45917
GAPDH	15	0.20254	0.47077	0.999997	434	5	0.033805	0.25515	0.54649	0.999997	596	4	0.033805
NonTargeting_Human_0394	1	0.20313	0.20299	0.999997	435	1	-0.49981	0.79687	0.79745	0.999997	1465	0	-0.49981
TMEM258	15	0.20402	0.4733	0.999997	436	6	-0.059615	0.057563	0.20442	0.999997	196	4	-0.059615
NonTargeting_Human_0372	1	0.20403	0.20386	0.999997	437	1	-0.40073	0.79597	0.79656	0.999997	1464	0	-0.40073
NonTargeting_Human_0795	1	0.20469	0.20462	0.999997	438	1	-0.64345	0.79531	0.79595	0.999997	1463	0	-0.64345
MPDU1	15	0.20476	0.47444	0.999997	439	3	0.13909	0.37727	0.66696	0.999997	810	4	0.13909
SP140	15	0.20508	0.47492	0.999997	440	5	0.12672	0.068222	0.23022	0.999997	217	5	0.12672
NonTargeting_Human_0038	1	0.2051	0.20502	0.999997	441	1	-0.52934	0.7949	0.79543	0.999997	1462	0	-0.52934
EPN1	15	0.20523	0.47514	0.999997	442	4	-0.11845	0.21736	0.49357	0.999997	506	2	-0.11845
NonTargeting_Human_0259	1	0.206	0.2058	0.999997	443	1	-0.62495	0.794	0.79443	0.999997	1461	0	-0.62495
NonTargeting_Human_0116	1	0.20641	0.20624	0.999997	444	1	-0.42964	0.79359	0.794	0.999997	1460	0	-0.42964
TNFRSF4	15	0.20652	0.47705	0.999997	445	3	0.29917	0.0075252	0.040895	0.772041	67	9	0.29917
NonTargeting_Human_0848	1	0.20764	0.20758	0.999997	446	1	-0.52563	0.79236	0.79279	0.999997	1458	0	-0.52563
MRPL9	15	0.20775	0.47889	0.999997	447	6	-0.16151	0.40643	0.69361	0.999997	869	2	-0.16151
NonTargeting_Human_0688	1	0.20805	0.2079	0.999997	448	1	-0.51523	0.79195	0.79244	0.999997	1457	0	-0.51523
NonTargeting_Human_0492	1	0.20821	0.20799	0.999997	449	1	-0.38431	0.79179	0.79227	0.999997	1455	0	-0.38431
UPP2	15	0.20949	0.48142	0.999997	450	4	0.11036	0.3796	0.66905	0.999997	815	5	0.11036
NonTargeting_Human_0595	1	0.21117	0.21086	0.999997	451	1	-0.41519	0.78883	0.78944	0.999997	1453	0	-0.41519
NonTargeting_Human_0288	1	0.21158	0.21124	0.999997	452	1	-0.34947	0.78842	0.78901	0.999997	1451	0	-0.34947
VPS51	15	0.21194	0.48501	0.999997	453	6	-0.34478	0.17812	0.4366	0.999997	433	4	-0.34478
NonTargeting_Human_0082	1	0.2124	0.21204	0.999997	454	1	-0.46722	0.7876	0.78828	0.999997	1450	0	-0.46722
NonTargeting_Human_0997	1	0.21277	0.21239	0.999997	455	1	-0.81165	0.78723	0.78788	0.999997	1449	0	-0.81165
CDC14A	15	0.21438	0.48846	0.999997	456	4	-0.1462	0.40451	0.69182	0.999997	865	4	-0.1462
ALG8	15	0.21454	0.48866	0.999997	457	6	-0.0045696	0.63405	0.84808	0.999997	1241	4	-0.0045696
NonTargeting_Human_0473	1	0.21535	0.21511	0.999997	458	1	-0.59469	0.78465	0.78532	0.999997	1447	0	-0.59469
NonTargeting_Human_0086	1	0.21601	0.21572	0.999997	459	1	-0.32163	0.78399	0.7847	0.999997	1446	0	-0.32163
NonTargeting_Human_0404	1	0.21609	0.21584	0.999997	460	1	-0.56146	0.78391	0.78463	0.999997	1444	0	-0.56146
DNAL4	15	0.2161	0.49084	0.999997	461	4	-0.20551	0.67831	0.87438	0.999997	1320	3	-0.20551
NonTargeting_Human_0072	1	0.21724	0.21708	0.999997	462	1	-0.52777	0.78276	0.7835	0.999997	1443	0	-0.52777
NonTargeting_Human_0393	1	0.2188	0.21862	0.999997	463	1	-0.45198	0.7812	0.78189	0.999997	1441	0	-0.45198
ICA1L	15	0.21889	0.49493	0.999997	464	5	0.073526	0.61361	0.83572	0.999997	1201	4	0.073526
NonTargeting_Human_0074	1	0.21946	0.21932	0.999997	465	1	-0.44046	0.78054	0.78117	0.999997	1440	0	-0.44046
NonTargeting_Human_0250	1	0.21962	0.21942	0.999997	466	1	-0.37969	0.78038	0.78102	0.999997	1439	0	-0.37969
NonTargeting_Human_0536	1	0.22011	0.21983	0.999997	467	1	-0.41817	0.77989	0.78046	0.999997	1438	0	-0.41817
ZW10	15	0.22036	0.497	0.999997	468	3	-0.17018	0.2484	0.53731	0.999997	580	5	-0.17018
NonTargeting_Human_0192	1	0.22192	0.22164	0.999997	469	1	-0.54968	0.77808	0.77876	0.999997	1437	0	-0.54968
POLRMT	15	0.2222	0.49988	0.999997	470	6	-0.13426	0.62115	0.84021	0.999997	1216	3	-0.13426
NonTargeting_Human_0576	1	0.22348	0.22309	0.999997	471	1	-0.87828	0.77652	0.77716	0.999997	1436	0	-0.87828
KLC2	15	0.2237	0.50221	0.999997	472	1	0.16125	0.053168	0.19346	0.999997	191	6	0.16125
BOLA2	15	0.22415	0.50298	0.999997	473	5	-0.067817	0.50841	0.77166	0.999997	1048	4	-0.067817
ACO2	15	0.22443	0.50334	0.999997	474	5	0.12671	0.32879	0.62084	0.999997	738	4	0.12671
NonTargeting_Human_0975	1	0.22503	0.22483	0.999997	475	1	-0.36828	0.77497	0.77544	0.999997	1432	0	-0.36828
NonTargeting_Human_0014	1	0.2252	0.22501	0.999997	476	1	-0.36695	0.7748	0.77526	0.999997	1431	0	-0.36695
NonTargeting_Human_0554	1	0.22586	0.22569	0.999997	477	1	-0.62321	0.77414	0.7746	0.999997	1430	0	-0.62321
EHD2	15	0.22663	0.50635	0.999997	478	6	-0.30412	0.26679	0.55991	0.999997	617	5	-0.30412
NonTargeting_Human_0207	1	0.22766	0.22763	0.999997	479	1	-0.48855	0.77234	0.77288	0.999997	1428	0	-0.48855
NonTargeting_Human_0007	1	0.22832	0.22839	0.999997	480	1	-0.42267	0.77168	0.77217	0.999997	1427	0	-0.42267
NonTargeting_Human_0187	1	0.2284	0.22846	0.999997	481	1	-0.54359	0.7716	0.77207	0.999997	1426	0	-0.54359
RPL28	15	0.23146	0.5131	0.999997	482	3	0.37165	0.018476	0.085749	0.901014	100	8	0.37165
NonTargeting_Human_0298	1	0.23168	0.23166	0.999997	483	1	-0.58713	0.76832	0.76888	0.999997	1425	0	-0.58713
hsa-mir-6831	12	0.23171	0.48992	0.999997	484	5	-0.26173	0.87754	0.93748	0.999997	1581	2	-0.26173
NonTargeting_Human_0405	1	0.23176	0.23174	0.999997	485	1	-0.35484	0.76824	0.76877	0.999997	1424	0	-0.35484
RUVBL2	15	0.23189	0.51375	0.999997	486	5	0.78709	0.0086362	0.046179	0.772041	72	8	0.78709
NonTargeting_Human_0713	1	0.23234	0.2323	0.999997	487	1	-0.42048	0.76766	0.76818	0.999997	1423	0	-0.42048
ZNF232	15	0.23288	0.51514	0.999997	488	5	-0.14816	0.10595	0.31499	0.999997	311	4	-0.14816
NonTargeting_Human_0334	1	0.23324	0.23322	0.999997	489	1	-0.41786	0.76676	0.76722	0.999997	1422	0	-0.41786
TMOD2	15	0.23606	0.51956	0.999997	490	6	-0.3836	0.89639	0.9597	0.999997	1604	1	-0.3836
EIF6	15	0.23624	0.51983	0.999997	491	4	0.15478	0.28119	0.57435	0.999997	637	5	0.15478
NonTargeting_Human_0085	1	0.23693	0.23691	0.999997	492	1	-0.45318	0.76307	0.76334	0.999997	1420	0	-0.45318
FZD6	15	0.23722	0.52138	0.999997	493	4	-0.11621	0.8491	0.94483	0.999997	1548	3	-0.11621
NonTargeting_Human_0200	1	0.23738	0.23726	0.999997	494	1	-0.41925	0.76262	0.76289	0.999997	1419	0	-0.41925
NonTargeting_Human_0010	1	0.23751	0.23739	0.999997	495	1	-0.42809	0.76249	0.76279	0.999997	1418	0	-0.42809
NonTargeting_Human_0456	1	0.238	0.23795	0.999997	496	1	-0.36902	0.762	0.76232	0.999997	1417	0	-0.36902
PHF3	15	0.23815	0.52255	0.999997	497	5	-0.25507	0.10025	0.30285	0.999997	297	4	-0.25507
C11orf57	15	0.23891	0.5237	0.999997	498	5	0.28542	0.12009	0.34438	0.999997	339	5	0.28542
NonTargeting_Human_0211	1	0.23907	0.23897	0.999997	499	1	-0.27289	0.76093	0.76131	0.999997	1416	0	-0.27289
NonTargeting_Human_0260	1	0.23923	0.23916	0.999997	500	1	-0.41648	0.76077	0.76114	0.999997	1415	0	-0.41648
ANKRD36	15	0.23929	0.52424	0.999997	501	5	-0.13601	0.51784	0.77739	0.999997	1060	2	-0.13601
SNRPD1	15	0.23947	0.52446	0.999997	502	5	0.62821	0.10214	0.30689	0.999997	302	6	0.62821
HAVCR1	15	0.23982	0.52492	0.999997	503	4	-0.17338	0.34295	0.63434	0.999997	760	4	-0.17338
RNPEP	15	0.23993	0.52508	0.999997	504	6	0.06081	0.55164	0.79763	0.999997	1120	2	0.06081
SLC4A1AP	15	0.24032	0.52552	0.999997	505	5	-0.16006	0.31761	0.61013	0.999997	713	4	-0.16006
TMEM253	15	0.24084	0.52642	0.999997	506	6	-0.10884	0.19541	0.4619	0.999997	463	6	-0.10884
SPATA25	15	0.24148	0.52729	0.999997	507	4	0.11315	0.59324	0.82312	0.999997	1174	4	0.11315
NonTargeting_Human_0253	1	0.24202	0.24198	0.999997	508	1	-0.729	0.75798	0.75841	0.999997	1412	0	-0.729
HSPA8	15	0.24243	0.52876	0.999997	509	5	-0.1365	0.23889	0.52397	0.999997	558	4	-0.1365
SNAPC3	15	0.24338	0.52997	0.999997	510	3	0.36352	0.03802	0.15154	0.991804	157	8	0.36352
NonTargeting_Human_0430	1	0.24358	0.2436	0.999997	511	1	-0.68072	0.75642	0.75687	0.999997	1411	0	-0.68072
NDUFV1	15	0.24433	0.53102	0.999997	512	3	0.44088	0.037597	0.15023	0.991804	155	7	0.44088
RPL13A	12	0.24472	0.5081	0.999997	513	4	0.34703	0.41297	0.67047	0.999997	881	4	0.34703
ARGLU1	15	0.24827	0.53534	0.999997	514	4	0.2852	0.040508	0.1597	0.99379	165	8	0.2852
NonTargeting_Human_0036	1	0.24875	0.24869	0.999997	515	1	-0.40773	0.75125	0.75148	0.999997	1409	0	-0.40773
NonTargeting_Human_0820	1	0.24891	0.24885	0.999997	516	1	-0.32257	0.75109	0.75133	0.999997	1408	0	-0.32257
FNTB	15	0.24941	0.53649	0.999997	517	5	-0.10109	0.69006	0.88012	0.999997	1341	3	-0.10109
NonTargeting_Human_0440	1	0.24957	0.24945	0.999997	518	1	-0.44422	0.75043	0.75066	0.999997	1407	0	-0.44422
NonTargeting_Human_0868	1	0.25146	0.25122	0.999997	519	1	-0.45832	0.74854	0.74886	0.999997	1405	0	-0.45832
NFRKB	15	0.25169	0.5388	0.999997	520	5	-0.18864	0.64035	0.85205	0.999997	1256	3	-0.18864
NonTargeting_Human_0843	1	0.25219	0.25209	0.999997	521	1	-0.33977	0.74781	0.74822	0.999997	1404	0	-0.33977
NonTargeting_Human_0245	1	0.25285	0.25272	0.999997	522	1	-0.38494	0.74715	0.74765	0.999997	1403	0	-0.38494
ANKRD35	15	0.25524	0.54265	0.999997	523	5	-0.21206	0.22149	0.49968	0.999997	515	5	-0.21206
NonTargeting_Human_0643	1	0.25527	0.25511	0.999997	524	1	-0.67382	0.74473	0.74517	0.999997	1402	0	-0.67382
NonTargeting_Human_0507	1	0.25556	0.2554	0.999997	525	1	-0.43701	0.74444	0.74484	0.999997	1401	0	-0.43701
DNLZ	15	0.25601	0.54353	0.999997	526	5	-0.05095	0.3884	0.67713	0.999997	839	4	-0.05095
NonTargeting_Human_0202	1	0.25613	0.25596	0.999997	527	1	-0.37664	0.74387	0.74424	0.999997	1400	0	-0.37664
NonTargeting_Human_0982	1	0.25622	0.256	0.999997	528	1	-0.72134	0.74378	0.74416	0.999997	1399	0	-0.72134
NonTargeting_Human_0168	1	0.25761	0.25755	0.999997	529	1	-0.6267	0.74239	0.7429	0.999997	1398	0	-0.6267
NonTargeting_Human_0308	1	0.2581	0.25813	0.999997	530	1	-0.46653	0.7419	0.74231	0.999997	1397	0	-0.46653
HMOX2	15	0.25935	0.54703	0.999997	531	4	0.21847	0.1149	0.33377	0.999997	328	5	0.21847
SREBF2	15	0.26036	0.54819	0.999997	532	4	-0.060397	0.067812	0.22926	0.999997	216	4	-0.060397
NonTargeting_Human_0991	1	0.26065	0.26047	0.999997	533	1	-0.26179	0.73935	0.73972	0.999997	1396	0	-0.26179
SRP19	15	0.26112	0.54901	0.999997	534	5	-0.098799	0.60459	0.83008	0.999997	1191	4	-0.098799
NonTargeting_Human_0520	1	0.26212	0.26194	0.999997	535	1	-0.43563	0.73788	0.73829	0.999997	1395	0	-0.43563
NonTargeting_Human_0365	1	0.2636	0.26355	0.999997	536	1	-0.30491	0.7364	0.73676	0.999997	1394	0	-0.30491
NonTargeting_Human_0673	1	0.26459	0.26461	0.999997	537	1	-0.38723	0.73541	0.73578	0.999997	1393	0	-0.38723
CAND1	15	0.26491	0.55286	0.999997	538	3	0.035822	0.65446	0.86029	0.999997	1280	2	0.035822
HTRA2	15	0.26505	0.55301	0.999997	539	4	-0.18139	0.70288	0.88459	0.999997	1362	3	-0.18139
NonTargeting_Human_0199	1	0.26635	0.26641	0.999997	540	1	-0.53797	0.73365	0.73389	0.999997	1392	0	-0.53797
NonTargeting_Human_0751	1	0.26664	0.26667	0.999997	541	1	-0.57311	0.73336	0.73365	0.999997	1391	0	-0.57311
NonTargeting_Human_0478	1	0.26729	0.26728	0.999997	542	1	-0.3531	0.73271	0.73299	0.999997	1390	0	-0.3531
NonTargeting_Human_0581	1	0.26803	0.26805	0.999997	543	1	-0.36566	0.73197	0.73234	0.999997	1389	0	-0.36566
NonTargeting_Human_0067	1	0.26861	0.26853	0.999997	544	1	-0.34239	0.73139	0.73174	0.999997	1388	0	-0.34239
NonTargeting_Human_0770	1	0.26869	0.26863	0.999997	545	1	-0.40713	0.73131	0.73164	0.999997	1387	0	-0.40713
EPHA2	15	0.26952	0.55766	0.999997	546	2	0.21187	0.28852	0.58152	0.999997	655	5	0.21187
UBA3	14	0.26966	0.54598	0.999997	547	4	0.27647	0.2255	0.49994	0.999997	526	5	0.27647
NonTargeting_Human_0976	1	0.27041	0.27028	0.999997	548	1	-0.30342	0.72959	0.72995	0.999997	1386	0	-0.30342
RPUSD4	15	0.27068	0.55885	0.999997	549	5	-0.017955	0.27432	0.56747	0.999997	630	5	-0.017955
NonTargeting_Human_0895	1	0.27123	0.27122	0.999997	550	1	-0.59035	0.72877	0.72915	0.999997	1385	0	-0.59035
SYS1	15	0.27208	0.56028	0.999997	551	4	-0.20306	0.69901	0.88323	0.999997	1355	1	-0.20306
PRPF38B	14	0.27228	0.54902	0.999997	552	5	0.52886	0.00026029	0.0018734	0.131287	25	7	0.52886
NonTargeting_Human_0320	1	0.27279	0.27268	0.999997	553	1	-0.49656	0.72721	0.72766	0.999997	1384	0	-0.49656
KBTBD12	15	0.27318	0.5614	0.999997	554	5	-0.23836	0.31841	0.61079	0.999997	716	2	-0.23836
NonTargeting_Human_0623	1	0.27328	0.27312	0.999997	555	1	-0.30581	0.72672	0.72713	0.999997	1383	0	-0.30581
NonTargeting_Human_0562	1	0.27361	0.27342	0.999997	556	1	-0.58128	0.72639	0.72685	0.999997	1382	0	-0.58128
TAF1B	15	0.27491	0.56327	0.999997	557	5	0.13909	0.83188	0.9367	0.999997	1521	3	0.13909
NonTargeting_Human_0304	1	0.2764	0.2763	0.999997	558	1	-0.37476	0.7236	0.72409	0.999997	1381	0	-0.37476
NonTargeting_Human_0900	1	0.27812	0.2779	0.999997	559	1	-0.32307	0.72188	0.72219	0.999997	1380	0	-0.32307
MRPS21	15	0.27824	0.56662	0.999997	560	5	0.093944	0.82733	0.93467	0.999997	1511	2	0.093944
CAPN15	15	0.27864	0.56705	0.999997	561	4	0.2056	0.13136	0.3637	0.999997	356	6	0.2056
NonTargeting_Human_0046	1	0.27894	0.27874	0.999997	562	1	-0.45993	0.72106	0.72128	0.999997	1378	0	-0.45993
ABHD14B	15	0.27955	0.56812	0.999997	563	5	-0.1836	0.69366	0.88129	0.999997	1349	3	-0.1836
FAM57B	15	0.28084	0.56935	0.999997	564	4	0.18127	0.15628	0.40268	0.999997	397	5	0.18127
NonTargeting_Human_0871	1	0.28091	0.28057	0.999997	565	1	-0.27468	0.71909	0.71933	0.999997	1377	0	-0.27468
NonTargeting_Human_0500	1	0.28214	0.28181	0.999997	566	1	-0.41007	0.71786	0.71819	0.999997	1375	0	-0.41007
NonTargeting_Human_0338	1	0.28247	0.2821	0.999997	567	1	-0.48009	0.71753	0.7179	0.999997	1374	0	-0.48009
NonTargeting_Human_0642	1	0.28436	0.28394	0.999997	568	1	-0.37567	0.71564	0.71593	0.999997	1373	0	-0.37567
NonTargeting_Human_0388	1	0.28493	0.28449	0.999997	569	1	-0.30088	0.71507	0.71532	0.999997	1372	0	-0.30088
COPS3	15	0.28497	0.57365	0.999997	570	3	-0.12229	0.94949	0.97733	0.999997	1669	1	-0.12229
EIF3F	15	0.28663	0.57535	0.999997	571	2	0.36226	0.0021734	0.013922	0.469059	46	7	0.36226
NonTargeting_Human_0996	1	0.28723	0.2868	0.999997	572	1	-0.2496	0.71277	0.71302	0.999997	1371	0	-0.2496
NonTargeting_Human_0995	1	0.29072	0.29035	0.999997	573	0	-0.47022	0.70928	0.70948	0.999997	1368	0	-0.47022
MRP63	15	0.29086	0.57944	0.999997	574	4	-0.1943	0.53015	0.78452	0.999997	1081	2	-0.1943
PRELP	15	0.29118	0.57973	0.999997	575	4	0.012636	0.81144	0.9277	0.999997	1486	3	0.012636
NonTargeting_Human_0006	1	0.29232	0.29199	0.999997	576	0	-0.34824	0.70768	0.70783	0.999997	1366	0	-0.34824
FZR1	15	0.29386	0.58225	0.999997	577	5	-0.22419	0.61876	0.83882	0.999997	1212	4	-0.22419
NonTargeting_Human_0971	1	0.29433	0.29413	0.999997	578	0	-0.36599	0.70567	0.706	0.999997	1365	0	-0.36599
ZFP3	15	0.29516	0.58358	0.999997	579	5	-0.16274	0.66045	0.86381	0.999997	1290	3	-0.16274
NonTargeting_Human_0832	1	0.29527	0.29519	0.999997	580	0	-0.28779	0.70473	0.70513	0.999997	1364	0	-0.28779
NonTargeting_Human_0104	1	0.29577	0.29576	0.999997	581	0	-0.24045	0.70423	0.70467	0.999997	1363	0	-0.24045
NonTargeting_Human_0659	1	0.29765	0.29765	0.999997	582	0	-0.34553	0.70235	0.70281	0.999997	1361	0	-0.34553
NonTargeting_Human_0690	1	0.29823	0.29822	0.999997	583	0	-0.52542	0.70177	0.70222	0.999997	1360	0	-0.52542
NonTargeting_Human_0205	1	0.29905	0.29898	0.999997	584	0	-0.31018	0.70095	0.70139	0.999997	1359	0	-0.31018
NonTargeting_Human_0990	1	0.29929	0.29917	0.999997	585	0	-0.37313	0.70071	0.70114	0.999997	1358	0	-0.37313
NOTCH2NL	15	0.30188	0.59026	0.999997	586	4	-0.006259	0.23629	0.52025	0.999997	553	6	-0.006259
NonTargeting_Human_0306	1	0.30397	0.30375	0.999997	587	0	-0.24607	0.69603	0.69642	0.999997	1352	0	-0.24607
NonTargeting_Human_0180	1	0.30471	0.30444	0.999997	588	0	-0.2414	0.69529	0.6957	0.999997	1351	0	-0.2414
NonTargeting_Human_0041	1	0.30537	0.30507	0.999997	589	0	-0.24182	0.69463	0.695	0.999997	1350	0	-0.24182
INTS6	14	0.3057	0.5866	0.999997	590	5	-0.1414	0.69907	0.87213	0.999997	1356	2	-0.1414
MRPL33	15	0.30696	0.59553	0.999997	591	5	-0.16306	0.91538	0.96548	0.999997	1628	1	-0.16306
NonTargeting_Human_0370	1	0.30717	0.30672	0.999997	592	0	-0.25545	0.69283	0.69342	0.999997	1348	0	-0.25545
NonTargeting_Human_0081	1	0.30734	0.30692	0.999997	593	0	-0.40718	0.69266	0.69332	0.999997	1347	0	-0.40718
NonTargeting_Human_0290	1	0.30783	0.30733	0.999997	594	0	-0.24951	0.69217	0.69288	0.999997	1346	0	-0.24951
CCDC101	15	0.30823	0.59688	0.999997	595	4	0.0032053	0.21048	0.48387	0.999997	492	5	0.0032053
NonTargeting_Human_0749	1	0.30881	0.3082	0.999997	596	0	-0.31194	0.69119	0.69182	0.999997	1345	0	-0.31194
FUNDC2	15	0.30885	0.59746	0.999997	597	5	0.15105	0.0085331	0.045665	0.772041	71	6	0.15105
NonTargeting_Human_0190	1	0.3098	0.30923	0.999997	598	0	-0.244	0.6902	0.69092	0.999997	1342	0	-0.244
NonTargeting_Human_0565	1	0.30996	0.30939	0.999997	599	0	-0.21455	0.69004	0.69074	0.999997	1340	0	-0.21455
CCDC169-SOHLH2	15	0.31063	0.5992	0.999997	600	3	-0.11914	0.3751	0.66489	0.999997	804	5	-0.11914
NonTargeting_Human_0912	1	0.31066	0.31014	0.999997	601	0	-0.41513	0.68934	0.68995	0.999997	1339	0	-0.41513
CARS	15	0.31074	0.59932	0.999997	602	5	-0.15548	0.40557	0.69281	0.999997	867	5	-0.15548
NonTargeting_Human_0855	1	0.31185	0.31135	0.999997	603	0	-0.2741	0.68815	0.68865	0.999997	1338	0	-0.2741
NonTargeting_Human_0687	1	0.31226	0.31181	0.999997	604	0	-0.21723	0.68774	0.68832	0.999997	1337	0	-0.21723
ABCG5	15	0.31237	0.60101	0.999997	605	2	-0.010746	0.21852	0.49526	0.999997	510	3	-0.010746
NonTargeting_Human_0737	1	0.31292	0.31245	0.999997	606	0	-0.36519	0.68708	0.68768	0.999997	1336	0	-0.36519
AKAP9	15	0.31342	0.60231	0.999997	607	5	-0.090891	0.27348	0.56656	0.999997	629	4	-0.090891
KAT8	14	0.31344	0.59508	0.999997	608	3	0.38391	0.035162	0.13911	0.98157	148	7	0.38391
NonTargeting_Human_0934	1	0.31345	0.31299	0.999997	609	0	-0.40064	0.68655	0.68723	0.999997	1335	0	-0.40064
TBX1	15	0.31372	0.60261	0.999997	610	5	-0.03501	0.23357	0.51651	0.999997	548	5	-0.03501
NonTargeting_Human_0885	1	0.31411	0.31359	0.999997	611	0	-0.49514	0.68589	0.68662	0.999997	1334	0	-0.49514
PKD1	15	0.31414	0.60297	0.999997	612	4	0.019166	0.63622	0.84948	0.999997	1246	2	0.019166
NonTargeting_Human_0400	1	0.31472	0.31413	0.999997	613	0	-0.30608	0.68528	0.68605	0.999997	1333	0	-0.30608
NonTargeting_Human_0321	1	0.3148	0.31422	0.999997	614	0	-0.22024	0.6852	0.68595	0.999997	1332	0	-0.22024
TPI1	15	0.31534	0.60422	0.999997	615	5	-0.028763	0.37566	0.66544	0.999997	806	5	-0.028763
ROR1	15	0.31592	0.60477	0.999997	616	3	0.32922	0.020964	0.094582	0.901014	111	8	0.32922
YPEL1	15	0.31616	0.60504	0.999997	617	5	-0.19305	0.76026	0.9065	0.999997	1414	3	-0.19305
NonTargeting_Human_0683	1	0.31644	0.31584	0.999997	618	0	-0.36888	0.68356	0.68422	0.999997	1330	0	-0.36888
NonTargeting_Human_0375	1	0.31653	0.3159	0.999997	619	0	-0.26614	0.68347	0.68411	0.999997	1329	0	-0.26614
NonTargeting_Human_0865	1	0.31792	0.31725	0.999997	620	0	-0.25779	0.68208	0.68275	0.999997	1327	0	-0.25779
NonTargeting_Human_0185	1	0.31841	0.3178	0.999997	621	0	-0.27019	0.68159	0.68221	0.999997	1326	0	-0.27019
STOML3	15	0.31949	0.60836	0.999997	622	3	0.11778	0.39267	0.68109	0.999997	848	2	0.11778
NonTargeting_Human_0369	1	0.32005	0.31961	0.999997	623	0	-0.33678	0.67995	0.68057	0.999997	1323	0	-0.33678
NIPSNAP1	15	0.32097	0.60974	0.999997	624	4	-0.0039575	0.5324	0.78594	0.999997	1085	3	-0.0039575
NonTargeting_Human_0596	1	0.32153	0.32112	0.999997	625	0	-0.28664	0.67847	0.67906	0.999997	1321	0	-0.28664
NonTargeting_Human_0213	1	0.32243	0.32202	0.999997	626	0	-0.20718	0.67757	0.67813	0.999997	1318	0	-0.20718
NonTargeting_Human_0480	1	0.32276	0.32232	0.999997	627	0	-0.1979	0.67724	0.67777	0.999997	1317	0	-0.1979
NonTargeting_Human_0303	1	0.32325	0.32286	0.999997	628	0	-0.20664	0.67675	0.6773	0.999997	1315	0	-0.20664
NonTargeting_Human_0429	1	0.32432	0.3239	0.999997	629	0	-0.26099	0.67568	0.67628	0.999997	1313	0	-0.26099
INO80D	15	0.32527	0.61407	0.999997	630	4	-0.057217	0.54513	0.79389	0.999997	1109	1	-0.057217
NonTargeting_Human_0181	1	0.32531	0.32487	0.999997	631	0	-0.24429	0.67469	0.67532	0.999997	1312	0	-0.24429
USP50	15	0.32612	0.61492	0.999997	632	3	-0.055862	0.58077	0.81498	0.999997	1154	4	-0.055862
hsa-mir-1302-6	7	0.32626	0.53205	0.999997	633	1	0.018056	0.2838	0.48254	0.999997	646	2	0.018056
CDK12	15	0.32697	0.61577	0.999997	634	5	0.11078	0.35368	0.64467	0.999997	773	5	0.11078
NonTargeting_Human_0613	1	0.32711	0.32662	0.999997	635	0	-0.44057	0.67289	0.67369	0.999997	1310	0	-0.44057
NonTargeting_Human_0878	1	0.32826	0.32785	0.999997	636	0	-0.37083	0.67174	0.67263	0.999997	1309	0	-0.37083
NonTargeting_Human_0853	1	0.32883	0.3284	0.999997	637	0	-0.26937	0.67117	0.6721	0.999997	1307	0	-0.26937
hsa-mir-3670-1	5	0.33043	0.4748	0.999997	638	1	0.016643	0.29973	0.44585	0.999997	678	2	0.016643
GTDC2	15	0.33212	0.62087	0.999997	639	4	-0.047371	0.19057	0.45477	0.999997	457	5	-0.047371
NonTargeting_Human_0130	1	0.3322	0.3317	0.999997	640	0	-0.28238	0.6678	0.66896	0.999997	1304	0	-0.28238
NonTargeting_Human_0738	1	0.33228	0.33181	0.999997	641	0	-0.40877	0.66772	0.66891	0.999997	1303	0	-0.40877
NonTargeting_Human_0231	1	0.33285	0.33239	0.999997	642	0	-0.18532	0.66715	0.66831	0.999997	1302	0	-0.18532
NonTargeting_Human_0428	1	0.33326	0.3328	0.999997	643	0	-0.32321	0.66674	0.66779	0.999997	1300	0	-0.32321
NonTargeting_Human_0578	1	0.33351	0.33307	0.999997	644	0	-0.35737	0.66649	0.66758	0.999997	1299	0	-0.35737
NonTargeting_Human_0145	1	0.33368	0.33327	0.999997	645	0	-0.35199	0.66632	0.66739	0.999997	1298	0	-0.35199
MEF2BNB	15	0.33438	0.62308	0.999997	646	4	-0.13366	0.77624	0.9128	0.999997	1435	3	-0.13366
KCNK4	15	0.3347	0.62338	0.999997	647	4	-0.23654	0.88219	0.95611	0.999997	1587	2	-0.23654
FURIN	15	0.33586	0.62458	0.999997	648	3	-0.034595	0.56333	0.80431	0.999997	1127	4	-0.034595
RALB	15	0.33591	0.62464	0.999997	649	5	-0.083197	0.54888	0.79592	0.999997	1113	3	-0.083197
NonTargeting_Human_0898	1	0.33622	0.33594	0.999997	650	0	-0.33195	0.66378	0.66484	0.999997	1296	0	-0.33195
WDR37	15	0.3371	0.62576	0.999997	651	2	-0.0055833	0.69681	0.88235	0.999997	1353	3	-0.0055833
NonTargeting_Human_0053	1	0.33737	0.33732	0.999997	652	0	-0.25557	0.66263	0.66375	0.999997	1294	0	-0.25557
SRGAP2	15	0.33751	0.62608	0.999997	653	5	-0.1261	0.91593	0.96562	0.999997	1630	2	-0.1261
NonTargeting_Human_0610	1	0.33868	0.33867	0.999997	654	0	-0.25971	0.66132	0.66225	0.999997	1293	0	-0.25971
MSI2	15	0.33878	0.62731	0.999997	655	4	-0.065848	0.48387	0.75656	0.999997	1010	4	-0.065848
NonTargeting_Human_0008	1	0.33909	0.33904	0.999997	656	0	-0.26003	0.66091	0.6619	0.999997	1291	0	-0.26003
NonTargeting_Human_0078	1	0.34008	0.33996	0.999997	657	0	-0.284	0.65992	0.66104	0.999997	1289	0	-0.284
NonTargeting_Human_0384	1	0.34024	0.34024	0.999997	658	0	-0.17671	0.65976	0.66087	0.999997	1288	0	-0.17671
NonTargeting_Human_0431	1	0.34049	0.34054	0.999997	659	0	-0.31281	0.65951	0.66065	0.999997	1287	0	-0.31281
NonTargeting_Human_0931	1	0.34106	0.34112	0.999997	660	0	-0.28247	0.65894	0.66014	0.999997	1286	0	-0.28247
NonTargeting_Human_0998	1	0.34303	0.34335	0.999997	661	0	-0.22112	0.65697	0.65844	0.999997	1284	0	-0.22112
NonTargeting_Human_0824	1	0.34352	0.3439	0.999997	662	0	-0.30465	0.65648	0.65798	0.999997	1281	0	-0.30465
KAT7	15	0.346	0.63456	0.999997	663	4	-0.25919	0.24308	0.52969	0.999997	564	4	-0.25919
NonTargeting_Human_0089	1	0.34689	0.347	0.999997	664	0	-0.16345	0.65311	0.65445	0.999997	1279	0	-0.16345
COPS2	14	0.34836	0.63359	0.999997	665	5	-0.32826	0.34553	0.63169	0.999997	765	2	-0.32826
DDX4	15	0.34844	0.63689	0.999997	666	3	0.14475	0.14153	0.37948	0.999997	368	4	0.14475
NonTargeting_Human_0624	1	0.34886	0.34889	0.999997	667	0	-0.35118	0.65114	0.65263	0.999997	1274	0	-0.35118
METAP1D	15	0.34957	0.63798	0.999997	668	3	0.052259	0.51809	0.77756	0.999997	1061	4	0.052259
NonTargeting_Human_0827	1	0.34976	0.34978	0.999997	669	0	-0.34634	0.65024	0.65168	0.999997	1272	0	-0.34634
DARS	15	0.34983	0.63824	0.999997	670	3	0.11198	0.042814	0.16679	0.999997	171	3	0.11198
FRG2C	15	0.35052	0.63902	0.999997	671	5	-0.28286	0.19453	0.46052	0.999997	461	4	-0.28286
NonTargeting_Human_0537	1	0.35058	0.35071	0.999997	672	0	-0.20034	0.64942	0.65099	0.999997	1271	0	-0.20034
NonTargeting_Human_0423	1	0.35115	0.3513	0.999997	673	0	-0.18881	0.64885	0.65038	0.999997	1270	0	-0.18881
RALGAPA1	15	0.35122	0.63965	0.999997	674	5	0.004656	0.476	0.75182	0.999997	995	3	0.004656
NonTargeting_Human_0901	1	0.3514	0.35154	0.999997	675	0	-0.3743	0.6486	0.65018	0.999997	1269	0	-0.3743
NonTargeting_Human_0891	1	0.35177	0.35191	0.999997	676	0	-0.20155	0.64823	0.64979	0.999997	1268	0	-0.20155
ORMDL3	15	0.35211	0.64052	0.999997	677	4	0.052345	0.20413	0.47472	0.999997	480	6	0.052345
NonTargeting_Human_0752	1	0.35292	0.35308	0.999997	678	0	-0.22338	0.64708	0.64854	0.999997	1267	0	-0.22338
PGA3	15	0.35309	0.64155	0.999997	679	3	0.15652	0.16352	0.41414	0.999997	412	5	0.15652
NonTargeting_Human_0716	1	0.35386	0.35399	0.999997	680	0	-0.24371	0.64614	0.6476	0.999997	1266	0	-0.24371
NonTargeting_Human_0059	1	0.35485	0.35496	0.999997	681	0	-0.25907	0.64515	0.64659	0.999997	1265	0	-0.25907
NonTargeting_Human_0203	1	0.35526	0.35535	0.999997	682	0	-0.1551	0.64474	0.64616	0.999997	1264	0	-0.1551
NonTargeting_Human_0105	1	0.35591	0.35604	0.999997	683	0	-0.24535	0.64409	0.6454	0.999997	1263	0	-0.24535
NonTargeting_Human_0285	1	0.35706	0.35709	0.999997	684	0	-0.33764	0.64294	0.64421	0.999997	1261	0	-0.33764
NAA38	15	0.35776	0.64611	0.999997	685	1	0.1087	0.023861	0.10452	0.901014	119	6	0.1087
NonTargeting_Human_0564	1	0.35796	0.35794	0.999997	686	0	-0.1924	0.64204	0.64332	0.999997	1260	0	-0.1924
NonTargeting_Human_0179	1	0.35846	0.35842	0.999997	687	0	-0.30774	0.64154	0.64286	0.999997	1259	0	-0.30774
NonTargeting_Human_0946	1	0.35854	0.35848	0.999997	688	0	-0.32398	0.64146	0.64278	0.999997	1258	0	-0.32398
NonTargeting_Human_0140	1	0.35887	0.35887	0.999997	689	0	-0.17425	0.64113	0.64246	0.999997	1257	0	-0.17425
SULT6B1	15	0.35887	0.6473	0.999997	690	5	-0.25834	0.18033	0.43986	0.999997	439	3	-0.25834
SNF8	15	0.35981	0.64829	0.999997	691	2	0.31502	0.18127	0.44135	0.999997	442	4	0.31502
NonTargeting_Human_0523	1	0.35993	0.35987	0.999997	692	0	-0.34235	0.64007	0.64141	0.999997	1254	0	-0.34235
NonTargeting_Human_0632	1	0.36026	0.3602	0.999997	693	0	-0.21465	0.63974	0.64109	0.999997	1253	0	-0.21465
CPSF3L	15	0.36038	0.6489	0.999997	694	3	0.02231	0.017699	0.082952	0.901014	98	6	0.02231
NonTargeting_Human_0286	1	0.36084	0.36073	0.999997	695	0	-0.23425	0.63916	0.64039	0.999997	1252	0	-0.23425
RPS14	14	0.36099	0.64707	0.999997	696	5	0.73295	0.00069345	0.0046934	0.249175	35	8	0.73295
TMEM87B	15	0.36138	0.6498	0.999997	697	5	0.053877	0.082976	0.26407	0.999997	256	6	0.053877
NonTargeting_Human_0095	1	0.36174	0.36153	0.999997	698	0	-0.19944	0.63826	0.63946	0.999997	1251	0	-0.19944
RALA	15	0.3619	0.6503	0.999997	699	4	0.25618	0.19728	0.46461	0.999997	465	6	0.25618
NonTargeting_Human_0011	1	0.36219	0.36202	0.999997	700	0	-0.25645	0.63781	0.63907	0.999997	1250	0	-0.25645
NonTargeting_Human_0630	1	0.36239	0.36223	0.999997	701	0	-0.21779	0.63761	0.63887	0.999997	1249	0	-0.21779
NonTargeting_Human_0841	1	0.36264	0.36247	0.999997	702	0	-0.26586	0.63736	0.63863	0.999997	1248	0	-0.26586
NonTargeting_Human_0858	1	0.36297	0.3628	0.999997	703	0	-0.24512	0.63703	0.63825	0.999997	1247	0	-0.24512
NonTargeting_Human_0720	1	0.3651	0.36497	0.999997	704	0	-0.22981	0.6349	0.63607	0.999997	1244	0	-0.22981
MTFP1	15	0.36513	0.65351	0.999997	705	4	-0.05804	0.36389	0.65445	0.999997	785	5	-0.05804
KIAA1328	15	0.3656	0.65393	0.999997	706	3	0.051283	0.30188	0.59428	0.999997	686	3	0.051283
NonTargeting_Human_0806	1	0.36584	0.36576	0.999997	707	0	-0.21652	0.63416	0.63536	0.999997	1243	0	-0.21652
NUDT21	15	0.36586	0.6542	0.999997	708	4	0.023357	0.21834	0.49493	0.999997	508	2	0.023357
NonTargeting_Human_0522	1	0.36592	0.36582	0.999997	709	0	-0.27959	0.63408	0.63527	0.999997	1242	0	-0.27959
NonTargeting_Human_0343	1	0.36617	0.36608	0.999997	710	0	-0.31993	0.63383	0.63507	0.999997	1240	0	-0.31993
NonTargeting_Human_0883	1	0.36633	0.36627	0.999997	711	0	-0.32329	0.63367	0.6349	0.999997	1239	0	-0.32329
SPI1	15	0.36652	0.65486	0.999997	712	4	0.12434	0.20552	0.47685	0.999997	483	5	0.12434
SEC61B	15	0.36666	0.65497	0.999997	713	4	-0.11926	0.95197	0.97834	0.999997	1673	2	-0.11926
MGAT1	15	0.36746	0.6558	0.999997	714	4	-0.16093	0.21208	0.48626	0.999997	497	3	-0.16093
NonTargeting_Human_0668	1	0.36847	0.36846	0.999997	715	0	-0.18428	0.63153	0.63275	0.999997	1237	0	-0.18428
NonTargeting_Human_0686	1	0.36945	0.3695	0.999997	716	0	-0.21603	0.63055	0.63181	0.999997	1235	0	-0.21603
NonTargeting_Human_0442	1	0.36962	0.36964	0.999997	717	0	-0.24945	0.63038	0.63163	0.999997	1234	0	-0.24945
NonTargeting_Human_0926	1	0.36978	0.36979	0.999997	718	0	-0.32364	0.63022	0.63143	0.999997	1233	0	-0.32364
NonTargeting_Human_0209	1	0.37044	0.37035	0.999997	719	0	-0.22762	0.62956	0.63068	0.999997	1232	0	-0.22762
NonTargeting_Human_0096	1	0.37076	0.37069	0.999997	720	0	-0.27794	0.62924	0.63036	0.999997	1231	0	-0.27794
PRPF6	15	0.37089	0.65922	0.999997	721	5	0.035269	0.13962	0.3764	0.999997	365	6	0.035269
NonTargeting_Human_0784	1	0.3713	0.37119	0.999997	722	0	-0.24484	0.6287	0.6297	0.999997	1230	0	-0.24484
GP1BB	15	0.37132	0.65962	0.999997	723	5	-0.15338	0.68298	0.87722	0.999997	1328	3	-0.15338
NonTargeting_Human_0575	1	0.37241	0.37235	0.999997	724	0	-0.18797	0.62759	0.62855	0.999997	1229	0	-0.18797
KDM8	15	0.3726	0.66087	0.999997	725	4	-0.006903	0.5742	0.81114	0.999997	1148	4	-0.006903
NonTargeting_Human_0280	1	0.37298	0.37301	0.999997	726	0	-0.20626	0.62702	0.62796	0.999997	1228	0	-0.20626
NonTargeting_Human_0149	1	0.37413	0.37418	0.999997	727	0	-0.17071	0.62587	0.62677	0.999997	1225	0	-0.17071
ACTR6	15	0.37465	0.66269	0.999997	728	3	0.28609	0.021325	0.095899	0.901014	112	7	0.28609
LAMTOR4	15	0.37473	0.66277	0.999997	729	4	-0.10764	0.75623	0.90491	0.999997	1410	3	-0.10764
CORO1A	15	0.37528	0.66328	0.999997	730	4	0.13341	0.22609	0.50621	0.999997	529	5	0.13341
hsa-mir-550a-1	9	0.37536	0.59584	0.999997	731	3	0.012529	0.075173	0.21335	0.999997	236	4	0.012529
SSH3	15	0.37566	0.66362	0.999997	732	5	-0.17398	0.431	0.71606	0.999997	906	3	-0.17398
NXF2	14	0.37586	0.66288	0.999997	733	3	-0.28746	0.58828	0.81383	0.999997	1164	2	-0.28746
NonTargeting_Human_0099	1	0.37626	0.37636	0.999997	734	0	-0.27389	0.62374	0.62454	0.999997	1222	0	-0.27389
NonTargeting_Human_0757	1	0.37667	0.37674	0.999997	735	0	-0.20191	0.62333	0.62409	0.999997	1221	0	-0.20191
hsa-mir-6508	8	0.37704	0.58709	0.999997	736	3	-0.19436	0.95562	0.95566	0.999997	1677	0	-0.19436
NonTargeting_Human_0718	1	0.3777	0.37774	0.999997	737	0	-0.20355	0.6223	0.62303	0.999997	1220	0	-0.20355
NonTargeting_Human_0876	1	0.3779	0.37794	0.999997	738	0	-0.29949	0.6221	0.62282	0.999997	1219	0	-0.29949
NonTargeting_Human_0459	1	0.37807	0.3781	0.999997	739	0	-0.19014	0.62193	0.62269	0.999997	1218	0	-0.19014
NonTargeting_Human_0487	1	0.37864	0.37873	0.999997	740	0	-0.19464	0.62136	0.62212	0.999997	1217	0	-0.19464
NonTargeting_Human_0656	1	0.37942	0.37954	0.999997	741	0	-0.22933	0.62058	0.62121	0.999997	1215	0	-0.22933
NonTargeting_Human_0305	1	0.37987	0.38004	0.999997	742	0	-0.28958	0.62013	0.62074	0.999997	1214	0	-0.28958
NonTargeting_Human_0004	1	0.38094	0.38116	0.999997	743	0	-0.17608	0.61906	0.6197	0.999997	1213	0	-0.17608
NonTargeting_Human_0829	1	0.38217	0.3825	0.999997	744	0	-0.24476	0.61783	0.6186	0.999997	1210	0	-0.24476
NonTargeting_Human_0416	1	0.38397	0.38432	0.999997	745	0	-0.17047	0.61603	0.61688	0.999997	1209	0	-0.17047
NonTargeting_Human_0475	1	0.38434	0.38462	0.999997	746	0	-0.2051	0.61566	0.61649	0.999997	1207	0	-0.2051
NonTargeting_Human_0542	1	0.38545	0.38575	0.999997	747	0	-0.27659	0.61455	0.61532	0.999997	1204	0	-0.27659
NonTargeting_Human_0692	1	0.38562	0.38588	0.999997	748	0	-0.2332	0.61438	0.61511	0.999997	1203	0	-0.2332
TCERG1	15	0.38584	0.673	0.999997	749	2	0.062741	0.47823	0.75316	0.999997	1000	4	0.062741
NonTargeting_Human_0974	1	0.38594	0.38623	0.999997	750	0	-0.27628	0.61406	0.61475	0.999997	1202	0	-0.27628
SCYL1	15	0.38607	0.67324	0.999997	751	5	-0.1595	0.99854	0.99838	0.999997	1733	0	-0.1595
UBA2	15	0.38801	0.6753	0.999997	752	4	-0.24681	0.67674	0.87345	0.999997	1314	3	-0.24681
MTHFD1	15	0.38804	0.67533	0.999997	753	3	0.42041	0.012555	0.063523	0.890653	87	9	0.42041
NonTargeting_Human_0804	1	0.38988	0.39017	0.999997	754	0	-0.24963	0.61012	0.61089	0.999997	1199	0	-0.24963
NonTargeting_Human_0328	1	0.39013	0.39044	0.999997	755	0	-0.19447	0.60987	0.61068	0.999997	1198	0	-0.19447
NonTargeting_Human_0950	1	0.39062	0.39093	0.999997	756	0	-0.23591	0.60938	0.61009	0.999997	1197	0	-0.23591
hsa-mir-638	15	0.39101	0.67806	0.999997	757	5	-0.090135	0.023299	0.10265	0.901014	117	5	-0.090135
RAB28	15	0.39112	0.67814	0.999997	758	3	0.086026	0.25822	0.55077	0.999997	599	6	0.086026
NonTargeting_Human_0884	1	0.39218	0.39261	0.999997	759	0	-0.20773	0.60782	0.60856	0.999997	1196	0	-0.20773
NonTargeting_Human_0366	1	0.39349	0.39382	0.999997	760	0	-0.16943	0.60651	0.60718	0.999997	1195	0	-0.16943
NonTargeting_Human_0269	1	0.39358	0.39389	0.999997	761	0	-0.11853	0.60642	0.60712	0.999997	1194	0	-0.11853
YME1L1	15	0.3936	0.68054	0.999997	762	2	0.15726	0.12879	0.35908	0.999997	353	5	0.15726
NonTargeting_Human_0133	1	0.39399	0.39433	0.999997	763	0	-0.20902	0.60601	0.60677	0.999997	1193	0	-0.20902
OR56A1	15	0.39421	0.68111	0.999997	764	4	0.034968	0.29035	0.58331	0.999997	656	5	0.034968
NonTargeting_Human_0678	1	0.39522	0.39552	0.999997	765	0	-0.23946	0.60478	0.6057	0.999997	1192	0	-0.23946
ZNHIT1	15	0.39522	0.68206	0.999997	766	3	0.17236	0.20593	0.47739	0.999997	485	6	0.17236
NonTargeting_Human_0025	1	0.39595	0.39615	0.999997	767	0	-0.22789	0.60405	0.60482	0.999997	1190	0	-0.22789
NonTargeting_Human_0419	1	0.39653	0.3967	0.999997	768	0	-0.21667	0.60347	0.60422	0.999997	1189	0	-0.21667
PGS1	15	0.39806	0.68481	0.999997	769	3	0.059513	0.59024	0.82122	0.999997	1167	2	0.059513
PIGQ	15	0.39844	0.68514	0.999997	770	3	0.17392	0.22633	0.50656	0.999997	531	4	0.17392
NonTargeting_Human_0488	1	0.39858	0.39886	0.999997	771	0	-0.12543	0.60142	0.60211	0.999997	1187	0	-0.12543
GYG2	15	0.39892	0.68551	0.999997	772	4	0.37257	0.062873	0.21765	0.999997	207	7	0.37257
NonTargeting_Human_0491	1	0.39948	0.39956	0.999997	773	0	-0.17679	0.60052	0.6011	0.999997	1186	0	-0.17679
WBSCR16	15	0.39963	0.68613	0.999997	774	5	-0.0079154	0.44074	0.72462	0.999997	932	5	-0.0079154
NonTargeting_Human_0955	1	0.39973	0.39982	0.999997	775	0	-0.2375	0.60027	0.60084	0.999997	1185	0	-0.2375
NonTargeting_Human_0519	1	0.40022	0.40032	0.999997	776	0	-0.12211	0.59978	0.60036	0.999997	1184	0	-0.12211
NonTargeting_Human_0368	1	0.40047	0.40052	0.999997	777	0	-0.20179	0.59953	0.60006	0.999997	1183	0	-0.20179
SULT1A2	15	0.40048	0.68691	0.999997	778	4	0.0021359	0.85098	0.94573	0.999997	1551	2	0.0021359
NonTargeting_Human_0817	1	0.40063	0.40067	0.999997	779	0	-0.18758	0.59937	0.59987	0.999997	1182	0	-0.18758
NonTargeting_Human_0357	1	0.40162	0.40169	0.999997	780	0	-0.12147	0.59838	0.59881	0.999997	1181	0	-0.12147
NonTargeting_Human_0401	1	0.4017	0.40178	0.999997	781	0	-0.16797	0.5983	0.59875	0.999997	1180	0	-0.16797
NLRP8	15	0.40175	0.68813	0.999997	782	5	0.24748	0.0093307	0.049253	0.790864	77	7	0.24748
TADA2A	15	0.40234	0.68868	0.999997	783	4	0.40094	0.039671	0.15696	0.99379	162	6	0.40094
NonTargeting_Human_0129	1	0.40252	0.40256	0.999997	784	0	-0.2294	0.59748	0.59792	0.999997	1179	0	-0.2294
LSM7	15	0.40358	0.68986	0.999997	785	4	0.030717	0.10578	0.31472	0.999997	310	4	0.030717
DCAKD	15	0.40417	0.69039	0.999997	786	3	0.10523	0.085178	0.26928	0.999997	261	7	0.10523
NonTargeting_Human_0420	1	0.40449	0.40434	0.999997	787	0	-0.20164	0.59551	0.59588	0.999997	1178	0	-0.20164
UBE2O	15	0.40492	0.69107	0.999997	788	3	-0.092674	0.3602	0.65103	0.999997	778	2	-0.092674
NonTargeting_Human_0224	1	0.40539	0.40535	0.999997	789	0	-0.18121	0.59461	0.59502	0.999997	1177	0	-0.18121
NonTargeting_Human_0094	1	0.40613	0.40615	0.999997	790	0	-0.12902	0.59387	0.59418	0.999997	1176	0	-0.12902
NonTargeting_Human_0495	1	0.40654	0.40655	0.999997	791	0	-0.15293	0.59346	0.59381	0.999997	1175	0	-0.15293
NonTargeting_Human_0529	1	0.40695	0.40699	0.999997	792	0	-0.13781	0.59305	0.59351	0.999997	1173	0	-0.13781
NonTargeting_Human_0788	1	0.4072	0.40728	0.999997	793	0	-0.16193	0.5928	0.59327	0.999997	1172	0	-0.16193
NonTargeting_Human_0186	1	0.40826	0.40837	0.999997	794	0	-0.18556	0.59174	0.59214	0.999997	1171	0	-0.18556
CPSF2	15	0.4084	0.6944	0.999997	795	5	-0.13699	0.79292	0.91977	0.999997	1459	3	-0.13699
NonTargeting_Human_0543	1	0.40843	0.40852	0.999997	796	0	-0.16989	0.59157	0.59197	0.999997	1170	0	-0.16989
COG2	15	0.4087	0.69472	0.999997	797	3	-0.22342	0.65309	0.85955	0.999997	1278	1	-0.22342
PRDM8	15	0.40917	0.69525	0.999997	798	5	-0.11666	0.63126	0.84638	0.999997	1236	3	-0.11666
LRRC8A	15	0.40945	0.69545	0.999997	799	3	0.039254	0.15601	0.40224	0.999997	396	6	0.039254
RAB13	15	0.40982	0.69575	0.999997	800	5	-0.094939	0.37534	0.66516	0.999997	805	4	-0.094939
NonTargeting_Human_0524	1	0.41105	0.41124	0.999997	801	0	-0.13458	0.58895	0.58941	0.999997	1166	0	-0.13458
NonTargeting_Human_0589	1	0.4113	0.41143	0.999997	802	0	-0.15017	0.5887	0.58913	0.999997	1165	0	-0.15017
SLC26A4	15	0.41204	0.6979	0.999997	803	4	0.025	0.77347	0.91165	0.999997	1429	3	0.025
NonTargeting_Human_0380	1	0.41442	0.41451	0.999997	804	0	-0.16746	0.58558	0.58604	0.999997	1162	0	-0.16746
NonTargeting_Human_0212	1	0.4145	0.41461	0.999997	805	0	-0.1997	0.5855	0.58596	0.999997	1161	0	-0.1997
NonTargeting_Human_0938	1	0.41466	0.41478	0.999997	806	0	-0.14667	0.58534	0.58578	0.999997	1160	0	-0.14667
NonTargeting_Human_0090	1	0.41647	0.41652	0.999997	807	0	-0.12417	0.58353	0.58404	0.999997	1159	0	-0.12417
NonTargeting_Human_0699	1	0.41762	0.41779	0.999997	808	0	-0.14064	0.58238	0.58288	0.999997	1156	0	-0.14064
NonTargeting_Human_0621	1	0.41877	0.41892	0.999997	809	0	-0.18294	0.58123	0.58173	0.999997	1155	0	-0.18294
C12orf43	15	0.41989	0.7054	0.999997	810	3	0.010486	0.0091554	0.048428	0.790864	76	5	0.010486
NonTargeting_Human_0650	1	0.42098	0.42116	0.999997	811	0	-0.087301	0.57902	0.57941	0.999997	1153	0	-0.087301
ALG13	15	0.42173	0.70706	0.999997	812	5	-0.030636	0.15508	0.40074	0.999997	390	3	-0.030636
NonTargeting_Human_0693	1	0.42229	0.42236	0.999997	813	0	-0.13147	0.57771	0.57798	0.999997	1152	0	-0.13147
NonTargeting_Human_0426	1	0.42254	0.42261	0.999997	814	0	-0.14422	0.57746	0.57774	0.999997	1151	0	-0.14422
AHSP	15	0.42286	0.70805	0.999997	815	4	-0.012332	0.32441	0.61648	0.999997	729	3	-0.012332
NonTargeting_Human_0964	1	0.42385	0.42387	0.999997	816	0	-0.17624	0.57615	0.57633	0.999997	1150	0	-0.17624
ZNF143	15	0.42541	0.71031	0.999997	817	4	-0.12492	0.12118	0.34619	0.999997	342	4	-0.12492
SERPINA1	15	0.42541	0.71031	0.999997	818	5	-0.11201	0.84087	0.94089	0.999997	1535	3	-0.11201
NonTargeting_Human_0249	1	0.4264	0.42628	0.999997	819	0	-0.10718	0.5736	0.5738	0.999997	1146	0	-0.10718
IPO9	15	0.42797	0.71262	0.999997	820	5	-0.32447	0.98715	0.98946	0.999997	1710	1	-0.32447
UBE2L3	15	0.42873	0.71341	0.999997	821	4	0.37446	0.098595	0.29953	0.999997	292	6	0.37446
NonTargeting_Human_0227	1	0.42902	0.42881	0.999997	822	0	-0.13587	0.57098	0.57116	0.999997	1145	0	-0.13587
PDE1A	15	0.4291	0.71373	0.999997	823	5	-0.36259	0.083255	0.26481	0.999997	257	3	-0.36259
NonTargeting_Human_0156	1	0.42952	0.42932	0.999997	824	0	-0.16152	0.57048	0.57065	0.999997	1143	0	-0.16152
NonTargeting_Human_0448	1	0.43001	0.4298	0.999997	825	0	-0.14732	0.56999	0.57019	0.999997	1142	0	-0.14732
NonTargeting_Human_0413	1	0.43009	0.42989	0.999997	826	0	-0.15993	0.56991	0.57012	0.999997	1141	0	-0.15993
NonTargeting_Human_0005	1	0.43017	0.42997	0.999997	827	0	-0.10263	0.56983	0.57007	0.999997	1140	0	-0.10263
RBM4B	15	0.4302	0.71481	0.999997	828	3	-0.041365	0.24741	0.53593	0.999997	575	5	-0.041365
NonTargeting_Human_0653	1	0.43025	0.43009	0.999997	829	0	-0.14919	0.56975	0.56998	0.999997	1139	0	-0.14919
PACRGL	15	0.43214	0.7166	0.999997	830	4	-0.15612	0.79179	0.91928	0.999997	1456	2	-0.15612
AXIN1	15	0.43279	0.71717	0.999997	831	5	-0.27321	0.49881	0.7657	0.999997	1033	4	-0.27321
NonTargeting_Human_0669	1	0.43296	0.43271	0.999997	832	0	-0.15084	0.56704	0.56716	0.999997	1138	0	-0.15084
NonTargeting_Human_0830	1	0.43378	0.43357	0.999997	833	0	-0.1372	0.56622	0.56642	0.999997	1137	0	-0.1372
NonTargeting_Human_0605	1	0.43436	0.43418	0.999997	834	0	-0.11348	0.56564	0.56578	0.999997	1135	0	-0.11348
NonTargeting_Human_0601	1	0.43444	0.43424	0.999997	835	0	-0.15102	0.56556	0.56569	0.999997	1134	0	-0.15102
SNX19	15	0.43453	0.71899	0.999997	836	2	-0.02642	0.50921	0.7721	0.999997	1049	4	-0.02642
MED1	15	0.43482	0.71923	0.999997	837	4	0.11607	0.021898	0.097866	0.901014	113	7	0.11607
NonTargeting_Human_0681	1	0.43485	0.43464	0.999997	838	0	-0.14784	0.56515	0.56529	0.999997	1133	0	-0.14784
NonTargeting_Human_0831	1	0.43518	0.43504	0.999997	839	0	-0.14227	0.56482	0.56498	0.999997	1132	0	-0.14227
CCDC43	15	0.43526	0.71962	0.999997	840	4	0.26223	0.11306	0.33016	0.999997	324	7	0.26223
NUDT17	15	0.43535	0.71972	0.999997	841	5	0.18473	0.58589	0.81831	0.999997	1163	4	0.18473
NonTargeting_Human_0084	1	0.43559	0.43546	0.999997	842	0	-0.12651	0.56441	0.56455	0.999997	1131	0	-0.12651
C2CD4A	15	0.43563	0.71996	0.999997	843	5	-0.11144	0.81389	0.92877	0.999997	1487	2	-0.11144
NonTargeting_Human_0016	1	0.43575	0.43562	0.999997	844	0	-0.11531	0.56425	0.56436	0.999997	1130	0	-0.11531
NonTargeting_Human_0677	1	0.43616	0.43601	0.999997	845	0	-0.14018	0.56384	0.56394	0.999997	1129	0	-0.14018
NonTargeting_Human_0837	1	0.43731	0.43713	0.999997	846	0	-0.10738	0.56269	0.56274	0.999997	1126	0	-0.10738
NonTargeting_Human_0191	1	0.43764	0.4375	0.999997	847	0	-0.12242	0.56236	0.56242	0.999997	1125	0	-0.12242
TMEM18	15	0.43871	0.72258	0.999997	848	4	-0.087708	0.52707	0.78286	0.999997	1074	4	-0.087708
NonTargeting_Human_0385	1	0.44035	0.44003	0.999997	849	0	-0.11512	0.55965	0.55952	0.999997	1124	0	-0.11512
ZNF548	15	0.44143	0.72502	0.999997	850	4	0.25301	0.1196	0.34364	0.999997	337	6	0.25301
G6PC	15	0.44452	0.7272	0.999997	851	4	-0.10511	0.66125	0.8643	0.999997	1292	4	-0.10511
C1orf198	15	0.44599	0.728	0.999997	852	2	0.20478	0.24016	0.52559	0.999997	560	6	0.20478
NonTargeting_Human_0567	1	0.44625	0.44612	0.999997	853	0	-0.081759	0.55375	0.55335	0.999997	1122	0	-0.081759
NonTargeting_Human_0932	1	0.44724	0.44711	0.999997	854	0	-0.11557	0.55276	0.55243	0.999997	1121	0	-0.11557
EFCAB5	15	0.44731	0.72877	0.999997	855	4	-0.03766	0.70062	0.88378	0.999997	1357	2	-0.03766
NonTargeting_Human_0698	1	0.44872	0.4486	0.999997	856	0	-0.092905	0.55128	0.55084	0.999997	1118	0	-0.092905
NonTargeting_Human_0499	1	0.44913	0.44894	0.999997	857	0	-0.094551	0.55087	0.55044	0.999997	1116	0	-0.094551
SLX4	15	0.45094	0.73096	0.999997	858	3	0.15108	0.15529	0.40112	0.999997	391	5	0.15108
NonTargeting_Human_0175	1	0.45237	0.45212	0.999997	859	0	-0.099464	0.54763	0.54719	0.999997	1112	0	-0.099464
NonTargeting_Human_0861	1	0.45471	0.45456	0.999997	860	0	-0.067177	0.54529	0.54485	0.999997	1110	0	-0.067177
hsa-mir-3680-1	10	0.4548	0.67486	0.999997	861	3	0.46587	0.0039246	0.019596	0.54326	58	5	0.46587
GNB1L	15	0.45503	0.73344	0.999997	862	4	-0.093788	0.78397	0.91602	0.999997	1445	3	-0.093788
NonTargeting_Human_0024	1	0.45569	0.45562	0.999997	863	0	-0.099991	0.54431	0.54369	0.999997	1107	0	-0.099991
NonTargeting_Human_0780	1	0.4561	0.45599	0.999997	864	0	-0.099099	0.5439	0.54325	0.999997	1105	0	-0.099099
NonTargeting_Human_0939	1	0.45643	0.45631	0.999997	865	0	-0.084883	0.54357	0.54293	0.999997	1104	0	-0.084883
NonTargeting_Human_0155	1	0.45782	0.45758	0.999997	866	0	-0.072698	0.54218	0.54153	0.999997	1103	0	-0.072698
NonTargeting_Human_0468	1	0.45791	0.45767	0.999997	867	0	-0.067955	0.54209	0.54144	0.999997	1102	0	-0.067955
CLEC12B	15	0.45862	0.73576	0.999997	868	3	0.081984	0.18746	0.45037	0.999997	452	3	0.081984
DNAJC17	15	0.45897	0.73602	0.999997	869	4	0.22766	0.036609	0.14709	0.991804	153	5	0.22766
NonTargeting_Human_0261	1	0.45996	0.45977	0.999997	870	0	-0.069754	0.54004	0.5394	0.999997	1101	0	-0.069754
NonTargeting_Human_0121	1	0.46012	0.45993	0.999997	871	0	-0.081578	0.53988	0.53917	0.999997	1100	0	-0.081578
NonTargeting_Human_0108	1	0.46061	0.46035	0.999997	872	0	-0.067718	0.53939	0.53861	0.999997	1099	0	-0.067718
NonTargeting_Human_0940	1	0.4607	0.46043	0.999997	873	0	-0.089426	0.5393	0.53855	0.999997	1098	0	-0.089426
NonTargeting_Human_0060	1	0.4616	0.46135	0.999997	874	0	-0.057222	0.5384	0.53762	0.999997	1096	0	-0.057222
NonTargeting_Human_0530	1	0.46168	0.46147	0.999997	875	0	-0.043121	0.53832	0.53756	0.999997	1095	0	-0.043121
PIGS	15	0.4623	0.73794	0.999997	876	4	-0.1401	0.76625	0.9088	0.999997	1421	2	-0.1401
NonTargeting_Human_0225	1	0.46275	0.46266	0.999997	877	0	-0.075752	0.53725	0.53654	0.999997	1093	0	-0.075752
NonTargeting_Human_0102	1	0.46291	0.46287	0.999997	878	0	-0.066714	0.53709	0.53641	0.999997	1092	0	-0.066714
NonTargeting_Human_0210	1	0.46365	0.4637	0.999997	879	0	-0.060753	0.53635	0.53568	0.999997	1091	0	-0.060753
PON1	15	0.46394	0.739	0.999997	880	4	-0.036284	0.49622	0.7642	0.999997	1028	3	-0.036284
NonTargeting_Human_0444	1	0.46529	0.4653	0.999997	881	0	-0.073703	0.53471	0.53399	0.999997	1089	0	-0.073703
NonTargeting_Human_0899	1	0.46554	0.46551	0.999997	882	0	-0.077483	0.53446	0.53372	0.999997	1088	0	-0.077483
NonTargeting_Human_0583	1	0.46734	0.46711	0.999997	883	0	-0.071356	0.53266	0.53207	0.999997	1086	0	-0.071356
NonTargeting_Human_0553	1	0.4689	0.46864	0.999997	884	0	-0.063708	0.5311	0.5306	0.999997	1083	0	-0.063708
NonTargeting_Human_0510	1	0.46915	0.46885	0.999997	885	0	-0.053423	0.53085	0.5304	0.999997	1082	0	-0.053423
ORMDL1	15	0.46964	0.74265	0.999997	886	3	0.14431	0.1342	0.36824	0.999997	358	6	0.14431
NonTargeting_Human_0296	1	0.47153	0.47138	0.999997	887	0	-0.047746	0.52847	0.52791	0.999997	1080	0	-0.047746
SYTL3	15	0.47166	0.74389	0.999997	888	2	0.11138	0.52465	0.78146	0.999997	1070	4	0.11138
NonTargeting_Human_0050	1	0.47202	0.47189	0.999997	889	0	-0.062078	0.52798	0.52746	0.999997	1079	0	-0.062078
GLOD5	15	0.47256	0.74446	0.999997	890	4	0.34028	0.058887	0.2079	0.999997	201	7	0.34028
NonTargeting_Human_0427	1	0.47263	0.47255	0.999997	891	0	-0.061438	0.52737	0.52696	0.999997	1078	0	-0.061438
NonTargeting_Human_0189	1	0.47276	0.47265	0.999997	892	0	-0.051122	0.52724	0.52686	0.999997	1077	0	-0.051122
NonTargeting_Human_0889	1	0.47284	0.47274	0.999997	893	0	-0.058098	0.52716	0.52681	0.999997	1076	0	-0.058098
NonTargeting_Human_0070	1	0.47292	0.47281	0.999997	894	0	-0.048398	0.52708	0.52674	0.999997	1075	0	-0.048398
TFAM	15	0.47302	0.74472	0.999997	895	3	-0.19763	0.83809	0.93966	0.999997	1528	2	-0.19763
NonTargeting_Human_0730	1	0.47391	0.47373	0.999997	896	0	-0.045465	0.52609	0.52587	0.999997	1073	0	-0.045465
NonTargeting_Human_0349	1	0.47407	0.47393	0.999997	897	0	-0.048947	0.52593	0.52565	0.999997	1072	0	-0.048947
KLHDC7B	15	0.47437	0.74563	0.999997	898	3	-0.067972	0.54425	0.79332	0.999997	1106	4	-0.067972
C19orf57	15	0.47504	0.74614	0.999997	899	4	-0.085569	0.17102	0.42572	0.999997	419	4	-0.085569
TPP2	15	0.47514	0.74623	0.999997	900	3	0.36103	0.023944	0.10484	0.901014	120	8	0.36103
NonTargeting_Human_0811	1	0.47698	0.47686	0.999997	901	0	-0.048321	0.52302	0.52275	0.999997	1069	0	-0.048321
NonTargeting_Human_0166	1	0.47743	0.47731	0.999997	902	0	-0.053038	0.52257	0.52232	0.999997	1068	0	-0.053038
NonTargeting_Human_0215	1	0.47834	0.4782	0.999997	903	0	-0.049762	0.52166	0.52136	0.999997	1067	0	-0.049762
NonTargeting_Human_0521	1	0.47883	0.47861	0.999997	904	0	-0.030856	0.52117	0.52081	0.999997	1066	0	-0.030856
NonTargeting_Human_0436	1	0.47965	0.47943	0.999997	905	0	-0.047793	0.52035	0.51991	0.999997	1065	0	-0.047793
NonTargeting_Human_0127	1	0.4799	0.47973	0.999997	906	0	-0.040749	0.5201	0.5197	0.999997	1064	0	-0.040749
DNAJC18	15	0.48052	0.74967	0.999997	907	4	-0.11901	0.30709	0.59953	0.999997	697	5	-0.11901
NonTargeting_Human_0019	1	0.48096	0.48062	0.999997	908	0	-0.035218	0.51904	0.51857	0.999997	1063	0	-0.035218
NonTargeting_Human_0049	1	0.48137	0.48104	0.999997	909	0	-0.036381	0.51863	0.51821	0.999997	1062	0	-0.036381
NonTargeting_Human_0862	1	0.48244	0.48218	0.999997	910	0	-0.042113	0.51756	0.51716	0.999997	1059	0	-0.042113
NonTargeting_Human_0734	1	0.48252	0.48226	0.999997	911	0	-0.042217	0.51748	0.51708	0.999997	1058	0	-0.042217
SMARCB1	15	0.48308	0.75136	0.999997	912	3	0.37518	0.0040574	0.024151	0.613216	59	7	0.37518
NonTargeting_Human_0483	1	0.48314	0.48279	0.999997	913	0	-0.029011	0.51686	0.51648	0.999997	1057	0	-0.029011
NonTargeting_Human_0097	1	0.48392	0.48361	0.999997	914	0	-0.034165	0.51608	0.51569	0.999997	1056	0	-0.034165
PLA2G10	15	0.4841	0.752	0.999997	915	2	0.035288	0.29697	0.58954	0.999997	674	3	0.035288
NonTargeting_Human_0309	1	0.48425	0.48398	0.999997	916	0	-0.033137	0.51575	0.51538	0.999997	1055	0	-0.033137
SPSB3	15	0.48507	0.75268	0.999997	917	3	-0.08717	0.59084	0.8216	0.999997	1168	3	-0.08717
NonTargeting_Human_0592	1	0.48523	0.48511	0.999997	918	0	-0.026332	0.51477	0.51436	0.999997	1054	0	-0.026332
MAOB	15	0.48785	0.75433	0.999997	919	4	-0.046054	0.019678	0.090152	0.901014	104	6	-0.046054
NonTargeting_Human_0573	1	0.48786	0.48777	0.999997	920	0	-0.031853	0.51214	0.51191	0.999997	1051	0	-0.031853
RAB5C	15	0.48903	0.75511	0.999997	921	1	1.0928	3.4603e-08	2.8256e-06	0.000413	8	11	1.0928
NonTargeting_Human_0628	1	0.49245	0.49222	0.999997	922	0	-0.016613	0.50755	0.50728	0.999997	1047	0	-0.016613
NonTargeting_Human_0458	1	0.49352	0.49326	0.999997	923	0	-0.018498	0.50648	0.50622	0.999997	1046	0	-0.018498
NonTargeting_Human_0399	1	0.4945	0.49428	0.999997	924	0	-0.016528	0.5055	0.50521	0.999997	1045	0	-0.016528
RPL23A	15	0.49459	0.75873	0.999997	925	2	-0.047149	0.61463	0.83629	0.999997	1205	3	-0.047149
NonTargeting_Human_0139	1	0.49508	0.49488	0.999997	926	0	-0.015507	0.50492	0.5046	0.999997	1044	0	-0.015507
IBA57	15	0.49545	0.75924	0.999997	927	4	0.00097838	0.82573	0.93391	0.999997	1506	3	0.00097838
NonTargeting_Human_0040	1	0.49557	0.49535	0.999997	928	0	-0.015875	0.50443	0.50413	0.999997	1043	0	-0.015875
NonTargeting_Human_0598	1	0.49631	0.49605	0.999997	929	0	-0.012167	0.50369	0.50348	0.999997	1041	0	-0.012167
NonTargeting_Human_0137	1	0.49688	0.4967	0.999997	930	0	-0.012502	0.50312	0.50291	0.999997	1040	0	-0.012502
NonTargeting_Human_0531	1	0.49762	0.49739	0.999997	931	0	-0.011551	0.50238	0.50227	0.999997	1039	0	-0.011551
NonTargeting_Human_0728	1	0.49828	0.49794	0.999997	932	0	-0.0092837	0.50172	0.50155	0.999997	1038	0	-0.0092837
NonTargeting_Human_0571	1	0.49926	0.49906	0.999997	933	0	-0.0060664	0.50074	0.50055	0.999997	1037	0	-0.0060664
NonTargeting_Human_0066	1	0.49967	0.49952	0.999997	934	0	-0.0050412	0.50033	0.5001	0.999997	1036	0	-0.0050412
NonTargeting_Human_0023	1	0.50053	0.5003	0.999997	935	0	-0.0031595	0.49947	0.49929	0.999997	1035	0	-0.0031595
NCAPG2	15	0.50074	0.76267	0.999997	936	3	0.27134	0.16429	0.41554	0.999997	413	6	0.27134
NMT1	15	0.50104	0.76285	0.999997	937	3	-0.038617	0.38664	0.67539	0.999997	837	5	-0.038617
NonTargeting_Human_0043	1	0.50115	0.50103	0.999997	938	0	-0.0013768	0.49885	0.49859	0.999997	1034	0	-0.0013768
NonTargeting_Human_0651	1	0.50139	0.50122	0.999997	939	0	-5.5191e-05	0.49861	0.49831	0.999997	1032	0	-5.5191e-05
NonTargeting_Human_0161	1	0.5023	0.50218	0.999997	940	0	0.00080655	0.4977	0.49745	0.999997	1031	0	0.00080655
NonTargeting_Human_0136	1	0.50312	0.50291	0.999997	941	0	0.0021336	0.49688	0.4967	0.999997	1030	0	0.0021336
NonTargeting_Human_0362	1	0.50328	0.50304	0.999997	942	0	0.0034176	0.49672	0.49653	0.999997	1029	0	0.0034176
NonTargeting_Human_0170	1	0.50476	0.50442	0.999997	943	0	0.0050968	0.49524	0.495	0.999997	1027	0	0.0050968
NonTargeting_Human_0927	1	0.50492	0.5046	0.999997	944	0	0.005874	0.49508	0.49488	0.999997	1026	0	0.005874
HIST1H2BB	15	0.50575	0.76581	0.999997	945	4	0.62223	0.00041774	0.0032862	0.191914	30	10	0.62223
SLC35F5	15	0.5065	0.76628	0.999997	946	3	-0.041504	0.74887	0.90193	0.999997	1406	1	-0.041504
NonTargeting_Human_0999	1	0.5089	0.50871	0.999997	947	0	0.010878	0.4911	0.49093	0.999997	1025	0	0.010878
NonTargeting_Human_0439	1	0.50903	0.50884	0.999997	948	0	0.0049759	0.49097	0.49081	0.999997	1024	0	0.0049759
NonTargeting_Human_0619	1	0.50911	0.50888	0.999997	949	0	0.012184	0.49089	0.49071	0.999997	1023	0	0.012184
NonTargeting_Human_0828	1	0.50919	0.50902	0.999997	950	0	0.031462	0.49081	0.4906	0.999997	1022	0	0.031462
INPP5J	15	0.50955	0.76828	0.999997	951	3	-0.15956	0.60226	0.82861	0.999997	1188	1	-0.15956
NonTargeting_Human_0449	1	0.51034	0.51012	0.999997	952	0	0.010733	0.48966	0.48941	0.999997	1020	0	0.010733
NonTargeting_Human_0188	1	0.51161	0.51142	0.999997	953	0	0.025349	0.48839	0.48824	0.999997	1019	0	0.025349
COA4	15	0.51175	0.76983	0.999997	954	4	0.15875	0.28561	0.57876	0.999997	650	5	0.15875
NonTargeting_Human_0056	1	0.51182	0.5116	0.999997	955	0	0.011152	0.48818	0.48805	0.999997	1017	0	0.011152
NonTargeting_Human_0464	1	0.51264	0.51232	0.999997	956	0	0.018774	0.48736	0.48723	0.999997	1016	0	0.018774
NonTargeting_Human_0455	1	0.51272	0.51242	0.999997	957	0	0.027706	0.48728	0.48713	0.999997	1015	0	0.027706
NonTargeting_Human_0977	1	0.51321	0.51289	0.999997	958	0	0.016248	0.48679	0.48659	0.999997	1014	0	0.016248
LGR5	15	0.5134	0.77086	0.999997	959	4	0.032663	0.19854	0.46657	0.999997	469	4	0.032663
NonTargeting_Human_0451	1	0.51444	0.51413	0.999997	960	0	0.016409	0.48556	0.48542	0.999997	1013	0	0.016409
SORT1	15	0.51463	0.77146	0.999997	961	2	0.038335	0.14474	0.38415	0.999997	373	6	0.038335
NonTargeting_Human_0799	1	0.51485	0.51442	0.999997	962	0	0.032039	0.48515	0.48504	0.999997	1012	0	0.032039
NonTargeting_Human_0917	1	0.51575	0.51538	0.999997	963	0	0.016185	0.48425	0.48398	0.999997	1011	0	0.016185
NonTargeting_Human_0435	1	0.51662	0.51625	0.999997	964	0	0.027371	0.48338	0.48308	0.999997	1009	0	0.027371
NonTargeting_Human_0825	1	0.51748	0.51708	0.999997	965	0	0.02995	0.48252	0.48226	0.999997	1008	0	0.02995
STXBP5L	15	0.51767	0.77337	0.999997	966	4	-0.1142	0.36505	0.65556	0.999997	786	5	-0.1142
NonTargeting_Human_0217	1	0.51781	0.51739	0.999997	967	0	0.023606	0.48219	0.48192	0.999997	1007	0	0.023606
CBWD1	15	0.518	0.77366	0.999997	968	4	0.23702	0.27226	0.56539	0.999997	626	4	0.23702
NonTargeting_Human_0776	1	0.51813	0.51774	0.999997	969	0	0.016596	0.48187	0.48153	0.999997	1006	0	0.016596
NonTargeting_Human_0425	1	0.51838	0.518	0.999997	970	0	0.017625	0.48162	0.48134	0.999997	1005	0	0.017625
RALGAPA2	15	0.51915	0.77431	0.999997	971	2	0.15088	0.24714	0.53558	0.999997	573	5	0.15088
NonTargeting_Human_0933	1	0.52019	0.51977	0.999997	972	0	0.019814	0.47981	0.47962	0.999997	1004	0	0.019814
NonTargeting_Human_0641	1	0.52043	0.52002	0.999997	973	0	0.03358	0.47957	0.47936	0.999997	1002	0	0.03358
ARPC5L	15	0.52078	0.77541	0.999997	974	4	-0.04134	0.20054	0.46938	0.999997	474	5	-0.04134
NonTargeting_Human_0505	1	0.52232	0.52207	0.999997	975	0	0.037897	0.47768	0.47754	0.999997	999	0	0.037897
NonTargeting_Human_0834	1	0.5224	0.52215	0.999997	976	0	0.029126	0.4776	0.47748	0.999997	998	0	0.029126
NonTargeting_Human_0988	1	0.52388	0.52373	0.999997	977	0	0.03797	0.47612	0.47596	0.999997	996	0	0.03797
HAPLN1	15	0.52486	0.77791	0.999997	978	4	0.19382	0.11549	0.33518	0.999997	331	7	0.19382
NonTargeting_Human_0353	1	0.52519	0.52504	0.999997	979	0	0.052123	0.47481	0.47471	0.999997	991	0	0.052123
ANXA13	15	0.52588	0.77851	0.999997	980	3	0.34564	0.048116	0.18057	0.999997	183	7	0.34564
SERPINB5	15	0.52649	0.77893	0.999997	981	3	-0.031999	0.56603	0.80597	0.999997	1136	4	-0.031999
NonTargeting_Human_0816	1	0.52691	0.5266	0.999997	982	0	0.024128	0.47309	0.47296	0.999997	988	0	0.024128
NonTargeting_Human_0744	1	0.52798	0.52746	0.999997	983	0	0.026875	0.47202	0.47189	0.999997	987	0	0.026875
NonTargeting_Human_0093	1	0.52839	0.52778	0.999997	984	0	0.038115	0.47161	0.47149	0.999997	986	0	0.038115
NonTargeting_Human_0103	1	0.52929	0.52885	0.999997	985	0	0.029196	0.47071	0.47049	0.999997	984	0	0.029196
NonTargeting_Human_0318	1	0.53044	0.53007	0.999997	986	0	0.037993	0.46956	0.46927	0.999997	983	0	0.037993
NonTargeting_Human_0146	1	0.53061	0.5302	0.999997	987	0	0.030782	0.46939	0.46912	0.999997	982	0	0.030782
METTL17	15	0.53076	0.78144	0.999997	988	1	0.034497	0.2311	0.51305	0.999997	542	5	0.034497
NonTargeting_Human_0789	1	0.53093	0.53045	0.999997	989	0	0.046355	0.46907	0.46878	0.999997	981	0	0.046355
NonTargeting_Human_0645	1	0.53102	0.53051	0.999997	990	0	0.027554	0.46898	0.46867	0.999997	980	0	0.027554
NonTargeting_Human_0289	1	0.53126	0.53075	0.999997	991	0	0.039108	0.46874	0.46847	0.999997	979	0	0.039108
KRTAP4-2	15	0.5324	0.7825	0.999997	992	3	0.25297	0.46026	0.74165	0.999997	969	4	0.25297
CTRL	15	0.53301	0.78288	0.999997	993	4	-0.027422	0.10575	0.31465	0.999997	309	6	-0.027422
NonTargeting_Human_0588	1	0.53307	0.53241	0.999997	994	0	0.045572	0.46693	0.46671	0.999997	978	0	0.045572
NonTargeting_Human_0182	1	0.53348	0.53286	0.999997	995	0	0.046195	0.46652	0.46634	0.999997	977	0	0.046195
NonTargeting_Human_0633	1	0.53364	0.53294	0.999997	996	0	0.045912	0.46636	0.4662	0.999997	976	0	0.045912
NonTargeting_Human_0872	1	0.53381	0.5331	0.999997	997	0	0.035831	0.46619	0.46602	0.999997	975	0	0.035831
NonTargeting_Human_0626	1	0.5366	0.53589	0.999997	998	0	0.045062	0.4634	0.46341	0.999997	973	0	0.045062
NonTargeting_Human_0443	1	0.53742	0.53666	0.999997	999	0	0.086742	0.46258	0.4625	0.999997	972	0	0.086742
DET1	15	0.5386	0.78678	0.999997	1000	4	-0.04389	0.074218	0.24415	0.999997	235	4	-0.04389
NonTargeting_Human_0124	1	0.53873	0.53796	0.999997	1001	0	0.04688	0.46127	0.46091	0.999997	971	0	0.04688
NonTargeting_Human_0256	1	0.53906	0.53828	0.999997	1002	0	0.04071	0.46094	0.46066	0.999997	970	0	0.04071
ZFAND1	15	0.54041	0.78794	0.999997	1003	4	-0.039137	0.82141	0.93195	0.999997	1500	2	-0.039137
NonTargeting_Human_0761	1	0.54086	0.54028	0.999997	1004	0	0.082525	0.45914	0.45888	0.999997	968	0	0.082525
NonTargeting_Human_0322	1	0.54144	0.5408	0.999997	1005	0	0.068971	0.45856	0.45831	0.999997	967	0	0.068971
SNAI1	15	0.54189	0.78874	0.999997	1006	4	0.024243	0.36217	0.65282	0.999997	781	3	0.024243
NonTargeting_Human_0335	1	0.54267	0.54198	0.999997	1007	0	0.056641	0.45733	0.45716	0.999997	964	0	0.056641
NonTargeting_Human_0402	1	0.54308	0.54247	0.999997	1008	0	0.063622	0.45692	0.45678	0.999997	963	0	0.063622
WDHD1	15	0.54334	0.78966	0.999997	1009	3	0.92829	0.00063898	0.0049364	0.251627	33	9	0.92829
NonTargeting_Human_0658	1	0.54587	0.54551	0.999997	1010	0	0.09054	0.45413	0.45391	0.999997	961	0	0.09054
NonTargeting_Human_0765	1	0.54611	0.5458	0.999997	1011	0	0.053912	0.45389	0.45359	0.999997	960	0	0.053912
NonTargeting_Human_0295	1	0.5462	0.54587	0.999997	1012	0	0.057083	0.4538	0.45349	0.999997	959	0	0.057083
NonTargeting_Human_0390	1	0.54681	0.54643	0.999997	1013	0	0.1352	0.45319	0.45294	0.999997	957	0	0.1352
CWC22	15	0.5469	0.79178	0.999997	1014	1	0.29723	0.027768	0.11793	0.921298	134	7	0.29723
NonTargeting_Human_0033	1	0.54718	0.5468	0.999997	1015	0	0.064195	0.45282	0.45259	0.999997	956	0	0.064195
NonTargeting_Human_0634	1	0.54743	0.54702	0.999997	1016	0	0.068869	0.45257	0.45235	0.999997	955	0	0.068869
CEP120	15	0.54748	0.79213	0.999997	1017	3	0.0054289	0.47971	0.75399	0.999997	1003	3	0.0054289
NonTargeting_Human_0928	1	0.54784	0.54735	0.999997	1018	0	0.13708	0.45216	0.45196	0.999997	954	0	0.13708
NonTargeting_Human_0819	1	0.54792	0.54746	0.999997	1019	0	0.047919	0.45208	0.45191	0.999997	953	0	0.047919
NonTargeting_Human_0943	1	0.54915	0.54869	0.999997	1020	0	0.099594	0.45085	0.45049	0.999997	951	0	0.099594
NonTargeting_Human_0284	1	0.54923	0.5488	0.999997	1021	0	0.047219	0.45077	0.45042	0.999997	950	0	0.047219
GALR1	15	0.54924	0.79312	0.999997	1022	2	0.29606	0.095849	0.29316	0.999997	283	7	0.29606
MGEA5	15	0.54928	0.79314	0.999997	1023	2	0.00063683	0.17318	0.42903	0.999997	424	4	0.00063683
NonTargeting_Human_0002	1	0.54948	0.54903	0.999997	1024	0	0.068168	0.45052	0.45022	0.999997	949	0	0.068168
NonTargeting_Human_0544	1	0.55096	0.5505	0.999997	1025	0	0.074362	0.44904	0.44888	0.999997	948	0	0.074362
NonTargeting_Human_0703	1	0.55112	0.55064	0.999997	1026	0	0.076614	0.44888	0.44872	0.999997	947	0	0.076614
NonTargeting_Human_0347	1	0.5512	0.55074	0.999997	1027	0	0.068073	0.4488	0.44864	0.999997	946	0	0.068073
NonTargeting_Human_0785	1	0.55145	0.55098	0.999997	1028	0	0.069633	0.44855	0.44838	0.999997	945	0	0.069633
NonTargeting_Human_0406	1	0.55358	0.55319	0.999997	1029	0	0.070453	0.44642	0.44623	0.999997	944	0	0.070453
NonTargeting_Human_0476	1	0.55383	0.55344	0.999997	1030	0	0.087297	0.44617	0.44606	0.999997	943	0	0.087297
NonTargeting_Human_0593	1	0.55424	0.5539	0.999997	1031	0	0.085714	0.44576	0.4456	0.999997	942	0	0.085714
NonTargeting_Human_0879	1	0.55432	0.55399	0.999997	1032	0	0.063414	0.44568	0.44553	0.999997	941	0	0.063414
NonTargeting_Human_0029	1	0.55457	0.55422	0.999997	1033	0	0.089782	0.44543	0.44529	0.999997	940	0	0.089782
NonTargeting_Human_0647	1	0.55473	0.55438	0.999997	1034	0	0.078415	0.44527	0.44515	0.999997	939	0	0.078415
NonTargeting_Human_0965	1	0.55481	0.55445	0.999997	1035	0	0.096989	0.44519	0.44505	0.999997	938	0	0.096989
EMC6	15	0.55564	0.7971	0.999997	1036	3	0.42859	0.0073103	0.039923	0.772041	66	8	0.42859
FAM219B	15	0.55597	0.79728	0.999997	1037	4	0.054741	0.38123	0.67059	0.999997	822	4	0.054741
NonTargeting_Human_0539	1	0.55641	0.55623	0.999997	1038	0	0.12227	0.44359	0.44347	0.999997	937	0	0.12227
XAGE1A	15	0.55679	0.79776	0.999997	1039	2	-0.085896	0.11414	0.33236	0.999997	326	6	-0.085896
NonTargeting_Human_0517	1	0.55695	0.55675	0.999997	1040	0	0.093951	0.44305	0.44293	0.999997	936	0	0.093951
NonTargeting_Human_0815	1	0.55867	0.55855	0.999997	1041	0	0.11544	0.44133	0.44105	0.999997	935	0	0.11544
CAPZB	15	0.55888	0.7991	0.999997	1042	4	0.25088	0.18977	0.45363	0.999997	456	5	0.25088
NonTargeting_Human_0216	1	0.55896	0.55884	0.999997	1043	0	0.16158	0.44104	0.44076	0.999997	934	0	0.16158
RPL41	7	0.55908	0.7008	0.999997	1044	2	0.2963	0.10967	0.26296	0.999997	317	3	0.2963
NonTargeting_Human_0821	1	0.55916	0.55903	0.999997	1045	0	0.081728	0.44084	0.44056	0.999997	933	0	0.081728
NonTargeting_Human_0062	1	0.55949	0.55937	0.999997	1046	0	0.067044	0.44051	0.44019	0.999997	931	0	0.067044
PDHX	15	0.55984	0.79961	0.999997	1047	4	-0.26333	0.43526	0.72002	0.999997	916	3	-0.26333
NonTargeting_Human_0577	1	0.55998	0.55981	0.999997	1048	0	0.12483	0.44002	0.43971	0.999997	930	0	0.12483
NonTargeting_Human_0221	1	0.56039	0.56024	0.999997	1049	0	0.15513	0.43961	0.43933	0.999997	929	0	0.15513
NonTargeting_Human_0471	1	0.56047	0.56029	0.999997	1050	0	0.059749	0.43953	0.43928	0.999997	928	0	0.059749
NonTargeting_Human_0358	1	0.56088	0.56074	0.999997	1051	0	0.065523	0.43912	0.43885	0.999997	927	0	0.065523
NonTargeting_Human_0590	1	0.56154	0.56148	0.999997	1052	0	0.11934	0.43846	0.43826	0.999997	926	0	0.11934
NonTargeting_Human_0978	1	0.56224	0.56228	0.999997	1053	0	0.19446	0.43776	0.43761	0.999997	925	0	0.19446
NSUN3	15	0.56257	0.80122	0.999997	1054	3	0.057186	0.032832	0.1349	0.963716	144	4	0.057186
NonTargeting_Human_0888	1	0.56277	0.5628	0.999997	1055	0	0.10584	0.43723	0.43703	0.999997	924	0	0.10584
NonTargeting_Human_0766	1	0.56294	0.56301	0.999997	1056	0	0.077965	0.43706	0.43687	0.999997	923	0	0.077965
NonTargeting_Human_0501	1	0.56318	0.56326	0.999997	1057	0	0.088316	0.43682	0.43658	0.999997	922	0	0.088316
NonTargeting_Human_0618	1	0.56376	0.56386	0.999997	1058	0	0.11318	0.43624	0.43607	0.999997	920	0	0.11318
TMEM199	15	0.56422	0.80222	0.999997	1059	2	0.30674	0.038145	0.15198	0.991804	160	7	0.30674
NonTargeting_Human_0379	1	0.56466	0.56479	0.999997	1060	0	0.078951	0.43534	0.43516	0.999997	917	0	0.078951
NonTargeting_Human_0378	1	0.56482	0.56498	0.999997	1061	0	0.098949	0.43518	0.43504	0.999997	915	0	0.098949
ATP5F1	15	0.56515	0.80284	0.999997	1062	3	0.24446	0.25869	0.55143	0.999997	600	6	0.24446
NonTargeting_Human_0407	1	0.56573	0.56586	0.999997	1063	0	0.085734	0.43427	0.43407	0.999997	913	0	0.085734
NonTargeting_Human_0701	1	0.56614	0.56632	0.999997	1064	0	0.066582	0.43386	0.43363	0.999997	912	0	0.066582
NonTargeting_Human_0992	1	0.56655	0.56666	0.999997	1065	0	0.17936	0.43345	0.43324	0.999997	911	0	0.17936
PGAP3	15	0.56708	0.80401	0.999997	1066	3	0.07496	0.26399	0.55709	0.999997	613	3	0.07496
DEXI	15	0.56729	0.80417	0.999997	1067	4	0.054954	0.19114	0.45556	0.999997	459	6	0.054954
NonTargeting_Human_0552	1	0.56737	0.5675	0.999997	1068	0	0.13299	0.43263	0.4324	0.999997	910	0	0.13299
ST6GAL1	15	0.56757	0.80435	0.999997	1069	3	0.083259	0.45804	0.73976	0.999997	965	5	0.083259
ERP44	15	0.56761	0.80436	0.999997	1070	1	0.24453	0.30213	0.59446	0.999997	687	5	0.24453
NonTargeting_Human_0410	1	0.56811	0.56826	0.999997	1071	0	0.16808	0.43189	0.43166	0.999997	909	0	0.16808
NonTargeting_Human_0263	1	0.56925	0.56941	0.999997	1072	0	0.090276	0.43075	0.4306	0.999997	905	0	0.090276
NonTargeting_Human_0967	1	0.57114	0.57133	0.999997	1073	0	0.12977	0.42886	0.42864	0.999997	903	0	0.12977
NonTargeting_Human_0275	1	0.57163	0.57176	0.999997	1074	0	0.13541	0.42837	0.42812	0.999997	902	0	0.13541
NonTargeting_Human_0612	1	0.57196	0.57215	0.999997	1075	0	0.16398	0.42804	0.42786	0.999997	900	0	0.16398
NonTargeting_Human_0452	1	0.57254	0.57274	0.999997	1076	0	0.12976	0.42746	0.42735	0.999997	899	0	0.12976
NonTargeting_Human_0174	1	0.57434	0.57453	0.999997	1077	0	0.085664	0.42566	0.42554	0.999997	898	0	0.085664
NonTargeting_Human_0747	1	0.575	0.57516	0.999997	1078	0	0.11359	0.425	0.42501	0.999997	897	0	0.11359
NonTargeting_Human_0196	1	0.57541	0.57561	0.999997	1079	0	0.10699	0.42459	0.42458	0.999997	896	0	0.10699
NonTargeting_Human_0697	1	0.5773	0.57758	0.999997	1080	0	0.10166	0.4227	0.42279	0.999997	893	0	0.10166
NonTargeting_Human_0218	1	0.57746	0.57774	0.999997	1081	0	0.08564	0.42254	0.42261	0.999997	892	0	0.08564
hsa-mir-6511a-4	15	0.57793	0.81105	0.999997	1082	3	-0.047741	0.4367	0.72129	0.999997	921	2	-0.047741
PTCHD4	15	0.57957	0.81205	0.999997	1083	2	0.11857	0.36753	0.65796	0.999997	794	5	0.11857
NonTargeting_Human_0508	1	0.57968	0.58018	0.999997	1084	0	0.14948	0.42032	0.42052	0.999997	891	0	0.14948
NonTargeting_Human_0157	1	0.58009	0.58064	0.999997	1085	0	0.12184	0.41991	0.4202	0.999997	890	0	0.12184
NonTargeting_Human_0892	1	0.5805	0.58101	0.999997	1086	0	0.18416	0.4195	0.41977	0.999997	889	0	0.18416
NonTargeting_Human_0913	1	0.58132	0.58179	0.999997	1087	0	0.12525	0.41868	0.41886	0.999997	888	0	0.12525
ELF4	15	0.58134	0.81313	0.999997	1088	4	0.16191	0.18645	0.44886	0.999997	450	5	0.16191
NonTargeting_Human_0742	1	0.5814	0.58187	0.999997	1089	0	0.092899	0.4186	0.4188	0.999997	887	0	0.092899
METAP1	15	0.58142	0.81317	0.999997	1090	3	0.09257	0.16321	0.41366	0.999997	411	3	0.09257
NonTargeting_Human_0398	1	0.58304	0.58351	0.999997	1091	0	0.11235	0.41696	0.41709	0.999997	886	0	0.11235
NonTargeting_Human_0907	1	0.58353	0.58404	0.999997	1092	0	0.16526	0.41647	0.41652	0.999997	885	0	0.16526
MLLT1	15	0.58364	0.81477	0.999997	1093	3	-0.099991	0.08903	0.27801	0.999997	272	6	-0.099991
DNAJC4	15	0.58419	0.81509	0.999997	1094	4	-0.14938	0.12215	0.34795	0.999997	345	4	-0.14938
MCM3	15	0.585	0.81569	0.999997	1095	1	0.59438	0.0060313	0.033854	0.732245	63	8	0.59438
RDH14	15	0.58502	0.8157	0.999997	1096	2	-0.0060776	0.39959	0.68735	0.999997	861	4	-0.0060776
NonTargeting_Human_0022	1	0.58558	0.58604	0.999997	1097	0	0.1242	0.41442	0.41451	0.999997	884	0	0.1242
FAM156A	15	0.58589	0.81623	0.999997	1098	4	0.056028	0.048297	0.18108	0.999997	184	6	0.056028
NonTargeting_Human_0696	1	0.5864	0.5869	0.999997	1099	0	0.12434	0.4136	0.41373	0.999997	883	0	0.12434
NonTargeting_Human_0951	1	0.58673	0.58723	0.999997	1100	0	0.19106	0.41327	0.4134	0.999997	882	0	0.19106
NonTargeting_Human_0759	1	0.58714	0.58761	0.999997	1101	0	0.10032	0.41286	0.41295	0.999997	880	0	0.10032
NonTargeting_Human_0945	1	0.58731	0.58777	0.999997	1102	0	0.14395	0.41269	0.41276	0.999997	879	0	0.14395
NonTargeting_Human_0796	1	0.58903	0.58948	0.999997	1103	0	0.26877	0.41097	0.41119	0.999997	877	0	0.26877
hsa-mir-1976	12	0.58905	0.79052	0.999997	1104	2	0.1409	0.65061	0.8303	0.999997	1273	1	0.1409
NonTargeting_Human_0045	1	0.58977	0.59027	0.999997	1105	0	0.11863	0.41023	0.41049	0.999997	876	0	0.11863
NonTargeting_Human_0265	1	0.58993	0.59047	0.999997	1106	0	0.099269	0.41007	0.41029	0.999997	874	0	0.099269
ARPC3	15	0.59012	0.81915	0.999997	1107	2	0.26614	0.10112	0.30477	0.999997	299	7	0.26614
CEP97	15	0.59116	0.81981	0.999997	1108	3	0.10526	0.41152	0.69846	0.999997	878	5	0.10526
NonTargeting_Human_0152	1	0.59272	0.59321	0.999997	1109	0	0.10706	0.40728	0.40737	0.999997	871	0	0.10706
ZNF213	15	0.5932	0.82116	0.999997	1110	4	0.18098	0.39344	0.68178	0.999997	850	4	0.18098
KIF3C	15	0.59324	0.82119	0.999997	1111	4	0.10526	0.21884	0.49572	0.999997	511	6	0.10526
NonTargeting_Human_0894	1	0.59379	0.59412	0.999997	1112	0	0.11865	0.40621	0.40624	0.999997	868	0	0.11865
NonTargeting_Human_0805	1	0.59625	0.59662	0.999997	1113	0	0.10707	0.40375	0.40365	0.999997	864	0	0.10707
PPAT	15	0.59661	0.82337	0.999997	1114	4	-0.036768	0.30495	0.59733	0.999997	692	4	-0.036768
NonTargeting_Human_0069	1	0.59748	0.59792	0.999997	1115	0	0.11063	0.40252	0.40256	0.999997	863	0	0.11063
MRPL42	15	0.59954	0.8252	0.999997	1116	3	0.063359	0.14435	0.38359	0.999997	372	6	0.063359
NonTargeting_Human_0774	1	0.60035	0.60096	0.999997	1117	0	0.14474	0.39965	0.39972	0.999997	862	0	0.14474
NonTargeting_Human_0071	1	0.60043	0.60105	0.999997	1118	0	0.1456	0.39957	0.39963	0.999997	860	0	0.1456
NonTargeting_Human_0597	1	0.60068	0.60134	0.999997	1119	0	0.11739	0.39932	0.39945	0.999997	859	0	0.11739
C10orf53	15	0.60122	0.82628	0.999997	1120	2	0.092452	0.47563	0.7516	0.999997	994	4	0.092452
NonTargeting_Human_0984	1	0.60199	0.60267	0.999997	1121	0	0.1484	0.39801	0.39825	0.999997	858	0	0.1484
WRNIP1	15	0.6033	0.82763	0.999997	1122	3	0.40113	0.023246	0.10245	0.901014	116	8	0.40113
HIST2H3A	15	0.60477	0.82854	0.999997	1123	3	-0.058671	0.95828	0.98139	0.999997	1680	2	-0.058671
NonTargeting_Human_0135	1	0.60519	0.606	0.999997	1124	0	0.13522	0.39481	0.39508	0.999997	854	0	0.13522
NonTargeting_Human_0840	1	0.60544	0.60624	0.999997	1125	0	0.11837	0.39456	0.39486	0.999997	852	0	0.11837
NonTargeting_Human_0479	1	0.60601	0.60677	0.999997	1126	0	0.21913	0.39399	0.39433	0.999997	851	0	0.21913
DYNLL1	15	0.60692	0.82998	0.999997	1127	1	0.44696	0.020844	0.094187	0.901014	110	8	0.44696
NonTargeting_Human_0709	1	0.60733	0.60798	0.999997	1128	0	0.20703	0.39267	0.39309	0.999997	849	0	0.20703
NonTargeting_Human_0371	1	0.60766	0.60838	0.999997	1129	0	0.16613	0.39234	0.39276	0.999997	847	0	0.16613
ARIH1	15	0.60831	0.83088	0.999997	1130	4	0.11161	0.17851	0.43718	0.999997	435	5	0.11161
NonTargeting_Human_0055	1	0.60897	0.60974	0.999997	1131	0	0.16442	0.39103	0.3914	0.999997	845	0	0.16442
NonTargeting_Human_0266	1	0.6093	0.61002	0.999997	1132	0	0.19435	0.3907	0.39104	0.999997	844	0	0.19435
NonTargeting_Human_0767	1	0.61069	0.61134	0.999997	1133	0	0.18838	0.38931	0.3897	0.999997	843	0	0.18838
NonTargeting_Human_0890	1	0.61086	0.61148	0.999997	1134	0	0.11079	0.38914	0.38956	0.999997	842	0	0.11079
NonTargeting_Human_0924	1	0.61151	0.61215	0.999997	1135	0	0.18369	0.38849	0.3889	0.999997	840	0	0.18369
NonTargeting_Human_0244	1	0.61184	0.61239	0.999997	1136	0	0.14151	0.38816	0.38858	0.999997	838	0	0.14151
NonTargeting_Human_0125	1	0.61365	0.61427	0.999997	1137	0	0.13275	0.38635	0.38665	0.999997	836	0	0.13275
NonTargeting_Human_0340	1	0.61389	0.61459	0.999997	1138	0	0.16644	0.38611	0.3864	0.999997	835	0	0.16644
NonTargeting_Human_0638	1	0.61397	0.61466	0.999997	1139	0	0.16834	0.38603	0.38631	0.999997	834	0	0.16834
hsa-mir-6770-1	10	0.61422	0.7904	0.999997	1140	2	0.2027	0.12002	0.30887	0.999997	338	4	0.2027
NonTargeting_Human_0684	1	0.61488	0.61562	0.999997	1141	0	0.13708	0.38512	0.38545	0.999997	832	0	0.13708
NonTargeting_Human_0941	1	0.61496	0.61568	0.999997	1142	0	0.2377	0.38504	0.38534	0.999997	831	0	0.2377
NonTargeting_Human_0313	1	0.61553	0.61633	0.999997	1143	0	0.12594	0.38447	0.38476	0.999997	830	0	0.12594
CTIF	15	0.6163	0.836	0.999997	1144	4	-0.32401	0.7582	0.90569	0.999997	1413	3	-0.32401
SMOC1	15	0.61659	0.83621	0.999997	1145	3	0.33063	0.087821	0.27528	0.999997	269	7	0.33063
NonTargeting_Human_0238	1	0.61693	0.61773	0.999997	1146	0	0.25069	0.38307	0.3834	0.999997	828	0	0.25069
NonTargeting_Human_0354	1	0.61701	0.61777	0.999997	1147	0	0.15419	0.38299	0.38329	0.999997	827	0	0.15419
NonTargeting_Human_0346	1	0.61742	0.61815	0.999997	1148	0	0.13076	0.38258	0.38298	0.999997	826	0	0.13076
NonTargeting_Human_0921	1	0.61791	0.61868	0.999997	1149	0	0.36375	0.38209	0.38243	0.999997	825	0	0.36375
NonTargeting_Human_0548	1	0.6184	0.61909	0.999997	1150	0	0.17642	0.3816	0.38197	0.999997	824	0	0.17642
UHRF2	15	0.6186	0.83746	0.999997	1151	3	-0.072192	0.45379	0.73594	0.999997	958	4	-0.072192
NonTargeting_Human_0281	1	0.61873	0.61939	0.999997	1152	0	0.125	0.38127	0.38152	0.999997	823	0	0.125
NonTargeting_Human_0919	1	0.61882	0.61948	0.999997	1153	0	0.20159	0.38118	0.38145	0.999997	820	0	0.20159
BID	15	0.61904	0.83772	0.999997	1154	4	-0.018843	0.36143	0.6521	0.999997	779	4	-0.018843
NonTargeting_Human_0778	1	0.61931	0.61992	0.999997	1155	0	0.14676	0.38069	0.38087	0.999997	819	0	0.14676
NARF	15	0.61996	0.83828	0.999997	1156	2	-0.0027376	0.24961	0.53888	0.999997	583	2	-0.0027376
NonTargeting_Human_0779	1	0.61996	0.62057	0.999997	1157	0	0.23282	0.38004	0.38022	0.999997	817	0	0.23282
NonTargeting_Human_0533	1	0.62029	0.62091	0.999997	1158	0	0.22069	0.37971	0.37986	0.999997	816	0	0.22069
NonTargeting_Human_0808	1	0.62119	0.62192	0.999997	1159	0	0.21461	0.37881	0.37892	0.999997	814	0	0.21461
NonTargeting_Human_0433	1	0.62144	0.62222	0.999997	1160	0	0.18299	0.37856	0.37862	0.999997	813	0	0.18299
C9orf41	15	0.62159	0.83929	0.999997	1161	1	0.24911	0.024886	0.10817	0.911153	123	7	0.24911
NonTargeting_Human_0027	1	0.6216	0.62241	0.999997	1162	0	0.18784	0.3784	0.37843	0.999997	812	0	0.18784
PIK3C3	15	0.62258	0.83995	0.999997	1163	2	0.84753	3.3162e-06	2.5431e-05	0.003182	14	12	0.84753
SSX4	15	0.62308	0.84027	0.999997	1164	2	0.27601	0.24982	0.5391	0.999997	584	6	0.27601
NonTargeting_Human_0736	1	0.62325	0.62397	0.999997	1165	0	0.1589	0.37675	0.37682	0.999997	809	0	0.1589
NonTargeting_Human_0700	1	0.62341	0.62419	0.999997	1166	0	0.18253	0.37659	0.37665	0.999997	808	0	0.18253
NonTargeting_Human_0432	1	0.62349	0.62428	0.999997	1167	0	0.13431	0.37651	0.37655	0.999997	807	0	0.13431
EIF5A	15	0.62448	0.84114	0.999997	1168	4	-0.033137	0.38879	0.6774	0.999997	841	2	-0.033137
NonTargeting_Human_0972	1	0.62513	0.62599	0.999997	1169	0	0.22916	0.37487	0.37494	0.999997	803	0	0.22916
NonTargeting_Human_0844	1	0.62546	0.62635	0.999997	1170	0	0.26575	0.37454	0.37467	0.999997	802	0	0.26575
NonTargeting_Human_0640	1	0.62571	0.62661	0.999997	1171	0	0.19194	0.37429	0.37442	0.999997	801	0	0.19194
TRIM4	15	0.62584	0.84197	0.999997	1172	4	-0.07134	0.69022	0.88016	0.999997	1343	2	-0.07134
PIP5K1A	15	0.62702	0.8427	0.999997	1173	2	0.35959	0.092838	0.28666	0.999997	278	6	0.35959
NonTargeting_Human_0732	1	0.62759	0.62855	0.999997	1174	0	0.28833	0.37241	0.37235	0.999997	799	0	0.28833
NonTargeting_Human_0106	1	0.62907	0.63019	0.999997	1175	0	0.15812	0.37093	0.37087	0.999997	798	0	0.15812
NonTargeting_Human_0195	1	0.63112	0.63237	0.999997	1176	0	0.18944	0.36888	0.36892	0.999997	796	0	0.18944
NonTargeting_Human_0233	1	0.63129	0.63254	0.999997	1177	0	0.17399	0.36871	0.36872	0.999997	795	0	0.17399
CPM	15	0.6315	0.84562	0.999997	1178	4	0.61864	0.0034949	0.021495	0.570582	56	8	0.61864
NonTargeting_Human_0364	1	0.63276	0.63407	0.999997	1179	0	0.26706	0.36724	0.36719	0.999997	793	0	0.26706
NonTargeting_Human_0122	1	0.63301	0.6343	0.999997	1180	0	0.10683	0.36699	0.3669	0.999997	792	0	0.10683
NonTargeting_Human_0557	1	0.63375	0.63497	0.999997	1181	0	0.15763	0.36625	0.36618	0.999997	790	0	0.15763
NonTargeting_Human_0989	1	0.63424	0.63545	0.999997	1182	0	0.35196	0.36576	0.36568	0.999997	789	0	0.35196
NonTargeting_Human_0494	1	0.63457	0.63575	0.999997	1183	0	0.2022	0.36543	0.3653	0.999997	788	0	0.2022
NonTargeting_Human_0460	1	0.6349	0.63607	0.999997	1184	0	0.29358	0.3651	0.36497	0.999997	787	0	0.29358
MAP1S	15	0.63579	0.84831	0.999997	1185	4	-0.10348	0.3329	0.62461	0.999997	743	2	-0.10348
NonTargeting_Human_0307	1	0.63621	0.63743	0.999997	1186	0	0.21236	0.36379	0.36367	0.999997	784	0	0.21236
NonTargeting_Human_0987	1	0.63637	0.63755	0.999997	1187	0	0.30198	0.36363	0.36352	0.999997	783	0	0.30198
ZG16B	15	0.6367	0.84892	0.999997	1188	2	0.10088	0.14651	0.38707	0.999997	377	6	0.10088
NonTargeting_Human_0969	1	0.63679	0.638	0.999997	1189	0	0.21179	0.36321	0.36309	0.999997	782	0	0.21179
NonTargeting_Human_0131	1	0.63785	0.63909	0.999997	1190	0	0.18618	0.36215	0.36195	0.999997	780	0	0.18618
RICTOR	15	0.6386	0.85009	0.999997	1191	3	0.54864	0.0081338	0.043811	0.772041	69	8	0.54864
NonTargeting_Human_0376	1	0.64335	0.64467	0.999997	1192	0	0.1717	0.35665	0.35666	0.999997	775	0	0.1717
NonTargeting_Human_0611	1	0.64458	0.64596	0.999997	1193	0	0.18403	0.35542	0.35553	0.999997	774	0	0.18403
ZBTB37	15	0.64528	0.85433	0.999997	1194	4	0.074457	0.68088	0.87586	0.999997	1325	4	0.074457
NonTargeting_Human_0773	1	0.6468	0.6483	0.999997	1195	0	0.31091	0.3532	0.35332	0.999997	772	0	0.31091
NonTargeting_Human_0101	1	0.64778	0.64933	0.999997	1196	0	0.17034	0.35222	0.35235	0.999997	771	0	0.17034
NonTargeting_Human_0387	1	0.64918	0.65075	0.999997	1197	0	0.23406	0.35082	0.35096	0.999997	770	0	0.23406
hsa-mir-7973-1	4	0.64989	0.65958	0.999997	1198	1	0.064318	0.78882	0.78903	0.999997	1452	0	0.064318
NonTargeting_Human_0123	1	0.65139	0.65287	0.999997	1199	0	0.15377	0.34861	0.34873	0.999997	769	0	0.15377
KCTD5	15	0.65188	0.85839	0.999997	1200	3	0.18008	0.33744	0.62893	0.999997	750	4	0.18008
NonTargeting_Human_0021	1	0.65238	0.65377	0.999997	1201	0	0.19566	0.34762	0.34771	0.999997	768	0	0.19566
MBOAT7	15	0.65355	0.85931	0.999997	1202	3	0.13741	0.011036	0.057013	0.861087	85	7	0.13741
NonTargeting_Human_0869	1	0.65418	0.65554	0.999997	1203	0	0.26079	0.34582	0.34601	0.999997	766	0	0.26079
FAM134C	15	0.65446	0.8598	0.999997	1204	2	0.097223	0.20613	0.47767	0.999997	486	5	0.097223
NonTargeting_Human_0469	1	0.65508	0.65653	0.999997	1205	0	0.18153	0.34492	0.34523	0.999997	763	0	0.18153
NonTargeting_Human_0490	1	0.65541	0.65685	0.999997	1206	0	0.21416	0.34459	0.34492	0.999997	762	0	0.21416
NonTargeting_Human_0814	1	0.65599	0.65742	0.999997	1207	0	0.23389	0.34401	0.34434	0.999997	761	0	0.23389
NonTargeting_Human_0299	1	0.65713	0.65855	0.999997	1208	0	0.56494	0.34287	0.34315	0.999997	759	0	0.56494
IRS2	15	0.65765	0.86179	0.999997	1209	2	0.02105	0.9354	0.97197	0.999997	1649	2	0.02105
NonTargeting_Human_0418	1	0.66058	0.66158	0.999997	1210	0	0.29195	0.33942	0.33935	0.999997	755	0	0.29195
BRD2	15	0.66073	0.8636	0.999997	1211	4	-0.046027	0.22961	0.5111	0.999997	539	3	-0.046027
NonTargeting_Human_0319	1	0.66099	0.66195	0.999997	1212	0	0.22429	0.33901	0.33896	0.999997	754	0	0.22429
NonTargeting_Human_0954	1	0.66124	0.66215	0.999997	1213	0	0.23817	0.33876	0.33876	0.999997	753	0	0.23817
MYOZ3	15	0.66291	0.86501	0.999997	1214	3	0.074656	0.18866	0.45205	0.999997	454	5	0.074656
HDAC6	15	0.66371	0.8654	0.999997	1215	3	0.51013	0.0093416	0.04931	0.790864	78	8	0.51013
CNTN6	15	0.66393	0.86554	0.999997	1216	1	0.3833	0.042366	0.1654	0.999997	169	8	0.3833
DGKK	15	0.66469	0.86612	0.999997	1217	3	0.19232	0.025091	0.10887	0.911274	125	6	0.19232
NonTargeting_Human_0725	1	0.66534	0.66634	0.999997	1218	0	0.31474	0.33466	0.33433	0.999997	749	0	0.31474
NonTargeting_Human_0679	1	0.66608	0.66709	0.999997	1219	0	0.24203	0.33392	0.33352	0.999997	748	0	0.24203
COX5B	15	0.66612	0.86701	0.999997	1220	4	-0.26431	0.32378	0.61584	0.999997	727	3	-0.26431
NonTargeting_Human_0247	1	0.66624	0.66728	0.999997	1221	0	0.24603	0.33376	0.33338	0.999997	747	0	0.24603
NonTargeting_Human_0833	1	0.66641	0.66747	0.999997	1222	0	0.26511	0.33359	0.33318	0.999997	746	0	0.26511
NonTargeting_Human_0035	1	0.66657	0.66766	0.999997	1223	0	0.24412	0.33343	0.33299	0.999997	745	0	0.24412
NonTargeting_Human_0178	1	0.66665	0.66772	0.999997	1224	0	0.22451	0.33335	0.33289	0.999997	744	0	0.22451
NonTargeting_Human_0602	1	0.66813	0.66927	0.999997	1225	0	0.21865	0.33187	0.3314	0.999997	742	0	0.21865
NonTargeting_Human_0746	1	0.66895	0.67009	0.999997	1226	0	0.33133	0.33105	0.33057	0.999997	741	0	0.33133
NonTargeting_Human_0854	1	0.66907	0.6702	0.999997	1227	0	0.39145	0.33093	0.33044	0.999997	740	0	0.39145
NonTargeting_Human_0287	1	0.67051	0.67152	0.999997	1228	0	0.2652	0.32949	0.32901	0.999997	739	0	0.2652
NonTargeting_Human_0981	1	0.67174	0.67263	0.999997	1229	0	0.49015	0.32826	0.32785	0.999997	737	0	0.49015
NonTargeting_Human_0003	1	0.67223	0.67312	0.999997	1230	0	0.35337	0.32777	0.32737	0.999997	736	0	0.35337
NonTargeting_Human_0051	1	0.67231	0.67319	0.999997	1231	0	0.23952	0.32769	0.32729	0.999997	735	0	0.23952
SLAMF6	15	0.67263	0.86954	0.999997	1232	3	0.038437	0.1759	0.43311	0.999997	429	4	0.038437
NonTargeting_Human_0254	1	0.67297	0.67377	0.999997	1233	0	0.30988	0.32703	0.32653	0.999997	734	0	0.30988
SIRT5	15	0.67431	0.87017	0.999997	1234	2	0.090342	0.56371	0.80458	0.999997	1128	3	0.090342
TSPYL4	15	0.67495	0.87039	0.999997	1235	2	0.20831	0.13805	0.37406	0.999997	362	6	0.20831
NonTargeting_Human_0739	1	0.67539	0.67609	0.999997	1236	0	0.41676	0.32461	0.32414	0.999997	731	0	0.41676
NonTargeting_Human_0386	1	0.67551	0.67615	0.999997	1237	0	0.38491	0.32449	0.32399	0.999997	730	0	0.38491
NonTargeting_Human_0839	1	0.67609	0.67664	0.999997	1238	0	0.30333	0.32391	0.32353	0.999997	728	0	0.30333
NonTargeting_Human_0241	1	0.67687	0.67745	0.999997	1239	0	0.27959	0.32313	0.32271	0.999997	726	0	0.27959
NonTargeting_Human_0973	1	0.6783	0.67889	0.999997	1240	0	0.47091	0.3217	0.32126	0.999997	724	0	0.47091
MRPL21	15	0.67831	0.8717	0.999997	1241	3	0.19478	0.15838	0.40603	0.999997	401	4	0.19478
NonTargeting_Human_0639	1	0.67888	0.67937	0.999997	1242	0	0.22559	0.32112	0.32072	0.999997	723	0	0.22559
NonTargeting_Human_0549	1	0.67945	0.67994	0.999997	1243	0	0.35566	0.32055	0.32017	0.999997	722	0	0.35566
NonTargeting_Human_0258	1	0.67978	0.68034	0.999997	1244	0	0.3013	0.32022	0.31977	0.999997	721	0	0.3013
SLC12A9	15	0.68001	0.8723	0.999997	1245	3	0.10865	0.11897	0.34242	0.999997	335	5	0.10865
NonTargeting_Human_0566	1	0.68109	0.68172	0.999997	1246	0	0.28144	0.31891	0.31842	0.999997	718	0	0.28144
NonTargeting_Human_0538	1	0.6815	0.68215	0.999997	1247	0	0.79426	0.3185	0.31791	0.999997	717	0	0.79426
NonTargeting_Human_0339	1	0.68175	0.68239	0.999997	1248	0	0.29809	0.31825	0.31763	0.999997	715	0	0.29809
STX10	15	0.68204	0.87305	0.999997	1249	3	0.15954	0.35773	0.64851	0.999997	776	3	0.15954
NonTargeting_Human_0206	1	0.68208	0.68275	0.999997	1250	0	0.44379	0.31792	0.31725	0.999997	714	0	0.44379
TAOK1	15	0.68256	0.87332	0.999997	1251	1	0.4856	0.001807	0.012006	0.438222	43	10	0.4856
NonTargeting_Human_0930	1	0.68306	0.68365	0.999997	1252	0	0.22011	0.31694	0.31632	0.999997	712	0	0.22011
NonTargeting_Human_0134	1	0.68331	0.68393	0.999997	1253	0	0.19669	0.31669	0.31611	0.999997	711	0	0.19669
DDX27	15	0.68382	0.87376	0.999997	1254	2	-0.10876	0.34212	0.63351	0.999997	758	4	-0.10876
NonTargeting_Human_0389	1	0.68487	0.68552	0.999997	1255	0	0.3713	0.31513	0.31451	0.999997	709	0	0.3713
NonTargeting_Human_0672	1	0.68503	0.68575	0.999997	1256	0	0.28574	0.31497	0.31434	0.999997	708	0	0.28574
NonTargeting_Human_0310	1	0.68577	0.68651	0.999997	1257	0	0.37996	0.31423	0.3137	0.999997	707	0	0.37996
NonTargeting_Human_0274	1	0.68651	0.68719	0.999997	1258	0	0.30419	0.31349	0.31301	0.999997	706	0	0.30419
NonTargeting_Human_0715	1	0.68684	0.68746	0.999997	1259	0	0.30802	0.31316	0.31268	0.999997	705	0	0.30802
NonTargeting_Human_0845	1	0.687	0.68762	0.999997	1260	0	0.3894	0.313	0.31251	0.999997	704	0	0.3894
NonTargeting_Human_0712	1	0.68823	0.68875	0.999997	1261	0	0.25315	0.31177	0.31126	0.999997	702	0	0.25315
NonTargeting_Human_0886	1	0.68996	0.69061	0.999997	1262	0	0.34814	0.31004	0.30953	0.999997	700	0	0.34814
NonTargeting_Human_0636	1	0.69119	0.69182	0.999997	1263	0	0.43026	0.30881	0.3082	0.999997	699	0	0.43026
NonTargeting_Human_0064	1	0.69266	0.69332	0.999997	1264	0	0.39788	0.30734	0.30692	0.999997	698	0	0.39788
PES1	15	0.69286	0.87711	0.999997	1265	3	-0.14331	0.038077	0.15174	0.991804	159	4	-0.14331
NonTargeting_Human_0223	1	0.69299	0.69356	0.999997	1266	0	0.27448	0.30701	0.30659	0.999997	696	0	0.27448
NonTargeting_Human_0897	1	0.69381	0.6943	0.999997	1267	0	0.31343	0.30619	0.30578	0.999997	694	0	0.31343
NHLRC2	15	0.69457	0.87782	0.999997	1268	2	0.075423	0.2226	0.50126	0.999997	517	5	0.075423
PRR20A	15	0.69471	0.87786	0.999997	1269	3	0.12844	0.53923	0.79046	0.999997	1097	4	0.12844
NonTargeting_Human_0905	1	0.69488	0.69524	0.999997	1270	0	0.3486	0.30512	0.30484	0.999997	693	0	0.3486
NonTargeting_Human_0201	1	0.6966	0.69703	0.999997	1271	0	0.23391	0.3034	0.30315	0.999997	689	0	0.23391
NonTargeting_Human_0586	1	0.69701	0.69741	0.999997	1272	0	0.25066	0.30299	0.30281	0.999997	688	0	0.25066
NonTargeting_Human_0148	1	0.69833	0.69876	0.999997	1273	0	0.2869	0.30167	0.30161	0.999997	685	0	0.2869
NonTargeting_Human_0937	1	0.69841	0.69883	0.999997	1274	0	0.23924	0.30159	0.30156	0.999997	684	0	0.23924
NonTargeting_Human_0083	1	0.69865	0.69911	0.999997	1275	0	0.24085	0.30135	0.30132	0.999997	683	0	0.24085
JAK1	15	0.6987	0.87938	0.999997	1276	2	0.4282	0.0024694	0.015742	0.491891	48	9	0.4282
NonTargeting_Human_0068	1	0.69906	0.69951	0.999997	1277	0	0.18476	0.30094	0.30085	0.999997	682	0	0.18476
NonTargeting_Human_0657	1	0.69931	0.69972	0.999997	1278	0	0.26838	0.30069	0.30065	0.999997	681	0	0.26838
NonTargeting_Human_0374	1	0.6998	0.7002	0.999997	1279	0	0.28691	0.3002	0.30006	0.999997	680	0	0.28691
NonTargeting_Human_0786	1	0.70054	0.701	0.999997	1280	0	0.41922	0.29946	0.29936	0.999997	677	0	0.41922
NonTargeting_Human_0164	1	0.70095	0.70139	0.999997	1281	0	0.51198	0.29905	0.29898	0.999997	676	0	0.51198
NonTargeting_Human_0838	1	0.70333	0.70372	0.999997	1282	0	0.44796	0.29667	0.29662	0.999997	673	0	0.44796
NonTargeting_Human_0446	1	0.7035	0.70389	0.999997	1283	0	0.23559	0.2965	0.29648	0.999997	671	0	0.23559
NonTargeting_Human_0849	1	0.70366	0.70401	0.999997	1284	0	0.26821	0.29634	0.29633	0.999997	670	0	0.26821
NonTargeting_Human_0970	1	0.70374	0.70409	0.999997	1285	0	0.98906	0.29626	0.29622	0.999997	669	0	0.98906
CNOT2	15	0.70379	0.8813	0.999997	1286	3	0.22375	0.31616	0.60862	0.999997	710	5	0.22375
NonTargeting_Human_0047	1	0.70391	0.70429	0.999997	1287	0	0.30375	0.29609	0.29608	0.999997	668	0	0.30375
NonTargeting_Human_0609	1	0.70546	0.70586	0.999997	1288	0	0.3217	0.29454	0.29435	0.999997	667	0	0.3217
CCDC53	15	0.70658	0.88225	0.999997	1289	2	0.23095	0.026746	0.11443	0.911274	131	6	0.23095
NonTargeting_Human_0283	1	0.70661	0.70682	0.999997	1290	0	0.21907	0.29339	0.29304	0.999997	666	1	0.21907
NonTargeting_Human_0198	1	0.70711	0.70725	0.999997	1291	0	0.23544	0.29289	0.29253	0.999997	663	1	0.23544
NonTargeting_Human_0332	1	0.70727	0.70745	0.999997	1292	0	0.33451	0.29273	0.29241	0.999997	662	1	0.33451
STRAP	15	0.70731	0.88255	0.999997	1293	2	0.51968	0.0038903	0.023382	0.611423	57	8	0.51968
GINS2	15	0.70733	0.88255	0.999997	1294	2	0.19848	0.19895	0.4671	0.999997	471	5	0.19848
NonTargeting_Human_0743	1	0.70784	0.70797	0.999997	1295	0	0.24482	0.29216	0.29182	0.999997	661	1	0.24482
ZNF22	15	0.70821	0.88296	0.999997	1296	3	-0.13552	0.58277	0.81632	0.999997	1157	4	-0.13552
PPP1R8	15	0.7085	0.88311	0.999997	1297	2	0.32871	0.052078	0.19057	0.999997	189	7	0.32871
NonTargeting_Human_0769	1	0.70866	0.70874	0.999997	1298	0	0.32209	0.29134	0.29095	0.999997	659	1	0.32209
NonTargeting_Human_0382	1	0.70891	0.709	0.999997	1299	0	0.31773	0.29109	0.29071	0.999997	658	1	0.31773
NonTargeting_Human_0525	1	0.70908	0.70921	0.999997	1300	0	0.29349	0.29092	0.29056	0.999997	657	1	0.29349
TBPL2	15	0.7116	0.88434	0.999997	1301	3	0.015402	0.022414	0.099713	0.901014	115	4	0.015402
NonTargeting_Human_0515	1	0.71162	0.71179	0.999997	1302	0	0.3345	0.28838	0.28811	0.999997	654	1	0.3345
NonTargeting_Human_0551	1	0.71252	0.71277	0.999997	1303	0	0.19985	0.28748	0.28713	0.999997	652	1	0.19985
NonTargeting_Human_0801	1	0.71375	0.71403	0.999997	1304	0	0.40721	0.28625	0.28587	0.999997	651	1	0.40721
PPM1A	15	0.71391	0.88522	0.999997	1305	1	0.23117	0.34635	0.63757	0.999997	767	5	0.23117
NonTargeting_Human_0450	1	0.71465	0.7149	0.999997	1306	0	0.24773	0.28535	0.28496	0.999997	649	1	0.24773
NonTargeting_Human_0535	1	0.7158	0.71611	0.999997	1307	0	0.38623	0.2842	0.28379	0.999997	648	1	0.38623
NonTargeting_Human_0694	1	0.71662	0.71696	0.999997	1308	0	0.49849	0.28338	0.28294	0.999997	644	1	0.49849
NonTargeting_Human_0044	1	0.71671	0.71704	0.999997	1309	0	0.2461	0.28329	0.28285	0.999997	643	1	0.2461
NonTargeting_Human_0330	1	0.71695	0.71729	0.999997	1310	0	0.32093	0.28305	0.28262	0.999997	642	1	0.32093
SPINT1	15	0.71717	0.88652	0.999997	1311	3	0.12432	0.05241	0.19148	0.999997	190	6	0.12432
NonTargeting_Human_0722	1	0.71753	0.7179	0.999997	1312	0	0.35325	0.28247	0.2821	0.999997	641	1	0.35325
NonTargeting_Human_0948	1	0.71859	0.71889	0.999997	1313	0	0.29678	0.28141	0.28106	0.999997	639	1	0.29678
NonTargeting_Human_0963	1	0.71876	0.71903	0.999997	1314	0	0.60508	0.28124	0.28093	0.999997	638	1	0.60508
NonTargeting_Human_0760	1	0.71896	0.71921	0.999997	1315	0	0.38499	0.28104	0.28068	0.999997	636	1	0.38499
NonTargeting_Human_0331	1	0.72138	0.72159	0.999997	1316	0	0.33268	0.27862	0.27843	0.999997	635	1	0.33268
NonTargeting_Human_0373	1	0.7222	0.72265	0.999997	1317	0	0.22512	0.2778	0.27756	0.999997	633	1	0.22512
NXPH2	15	0.7238	0.88913	0.999997	1318	3	0.10278	0.31209	0.60451	0.999997	703	5	0.10278
NonTargeting_Human_0063	1	0.72393	0.72436	0.999997	1319	0	0.41664	0.27607	0.27593	0.999997	632	1	0.41664
NonTargeting_Human_0600	1	0.72499	0.72553	0.999997	1320	0	0.3111	0.27501	0.27492	0.999997	631	1	0.3111
SSX2	15	0.7265	0.89027	0.999997	1321	3	-0.051984	0.071194	0.23708	0.999997	227	5	-0.051984
KTI12	15	0.72651	0.89027	0.999997	1322	2	0.50234	0.0013209	0.0089544	0.348625	41	10	0.50234
NonTargeting_Human_0411	1	0.72655	0.72701	0.999997	1323	0	0.35175	0.27345	0.27327	0.999997	628	1	0.35175
NonTargeting_Human_0438	1	0.72803	0.72843	0.999997	1324	0	0.39284	0.27197	0.27194	0.999997	625	1	0.39284
NonTargeting_Human_0467	1	0.72885	0.72922	0.999997	1325	0	0.52292	0.27115	0.27113	0.999997	623	1	0.52292
NonTargeting_Human_0629	1	0.73033	0.7306	0.999997	1326	0	0.35321	0.26967	0.26961	0.999997	622	1	0.35321
NonTargeting_Human_0952	1	0.73057	0.73088	0.999997	1327	0	0.18607	0.26943	0.26941	0.999997	621	1	0.18607
ZBTB17	15	0.73122	0.89204	0.999997	1328	2	0.43998	0.024518	0.10683	0.90856	121	7	0.43998
NonTargeting_Human_0162	1	0.73221	0.73254	0.999997	1329	0	0.3604	0.26779	0.26779	0.999997	619	1	0.3604
NonTargeting_Human_0513	1	0.73287	0.73311	0.999997	1330	0	0.40004	0.26713	0.26714	0.999997	618	1	0.40004
COG5	15	0.73427	0.89332	0.999997	1331	3	0.0068411	0.071202	0.2371	0.999997	228	4	0.0068411
NonTargeting_Human_0807	1	0.73468	0.73494	0.999997	1332	0	0.37849	0.26532	0.26543	0.999997	615	1	0.37849
SHC1	15	0.73479	0.89355	0.999997	1333	2	-0.09685	0.42286	0.70874	0.999997	894	5	-0.09685
NonTargeting_Human_0980	1	0.73541	0.73578	0.999997	1334	0	0.53361	0.26459	0.26461	0.999997	614	1	0.53361
UPF1	15	0.73547	0.89383	0.999997	1335	3	0.24065	0.33962	0.63102	0.999997	756	4	0.24065
NonTargeting_Human_0859	1	0.73624	0.73665	0.999997	1336	0	0.32613	0.26376	0.26373	0.999997	612	1	0.32613
NonTargeting_Human_0204	1	0.73648	0.73684	0.999997	1337	0	0.40835	0.26352	0.26347	0.999997	611	1	0.40835
NonTargeting_Human_0498	1	0.73714	0.73751	0.999997	1338	0	0.41239	0.26286	0.2628	0.999997	610	1	0.41239
NonTargeting_Human_0098	1	0.73779	0.73823	0.999997	1339	0	0.34499	0.26221	0.26204	0.999997	608	1	0.34499
NDUFA13	15	0.73886	0.89509	0.999997	1340	3	0.092409	0.86027	0.95023	0.999997	1563	1	0.092409
NonTargeting_Human_0903	1	0.73894	0.7394	0.999997	1341	0	0.43626	0.26106	0.2609	0.999997	606	1	0.43626
NonTargeting_Human_0092	1	0.73911	0.73956	0.999997	1342	0	0.4718	0.26089	0.26072	0.999997	605	1	0.4718
NonTargeting_Human_0616	1	0.73993	0.74032	0.999997	1343	0	0.55177	0.26007	0.25993	0.999997	603	1	0.55177
NonTargeting_Human_0236	1	0.74042	0.74076	0.999997	1344	0	0.50709	0.25958	0.2595	0.999997	602	1	0.50709
NonTargeting_Human_0075	1	0.74124	0.74167	0.999997	1345	0	0.38887	0.25876	0.25877	0.999997	601	1	0.38887
NonTargeting_Human_0516	1	0.74313	0.74357	0.999997	1346	0	0.43513	0.25687	0.25671	0.999997	598	1	0.43513
PAGE4	15	0.74374	0.89712	0.999997	1347	2	0.19885	0.11899	0.34245	0.999997	336	6	0.19885
NonTargeting_Human_0748	1	0.74477	0.74524	0.999997	1348	0	0.51818	0.25523	0.25509	0.999997	597	1	0.51818
NonTargeting_Human_0297	1	0.74616	0.74662	0.999997	1349	0	0.24655	0.25384	0.25367	0.999997	595	1	0.24655
NonTargeting_Human_0057	1	0.7469	0.74736	0.999997	1350	0	0.39803	0.2531	0.25295	0.999997	594	1	0.39803
NonTargeting_Human_0327	1	0.74781	0.74822	0.999997	1351	0	0.43337	0.25219	0.25209	0.999997	593	1	0.43337
NonTargeting_Human_0735	1	0.74871	0.74903	0.999997	1352	0	0.34172	0.25129	0.2511	0.999997	591	1	0.34172
NonTargeting_Human_0172	1	0.74928	0.74957	0.999997	1353	0	0.4159	0.25072	0.25057	0.999997	589	1	0.4159
NonTargeting_Human_0850	1	0.74969	0.74996	0.999997	1354	0	0.36514	0.25031	0.25016	0.999997	587	1	0.36514
NonTargeting_Human_0228	1	0.7501	0.75037	0.999997	1355	0	0.29881	0.2499	0.2498	0.999997	585	1	0.29881
MFAP1	14	0.75066	0.89448	0.999997	1356	3	0.3515	0.076764	0.25009	0.999997	241	6	0.3515
KRTAP13-2	15	0.7509	0.90011	0.999997	1357	2	0.3361	0.019892	0.091028	0.901014	107	8	0.3361
NonTargeting_Human_0497	1	0.75109	0.75133	0.999997	1358	0	0.3458	0.24891	0.24885	0.999997	582	1	0.3458
NonTargeting_Human_0138	1	0.75142	0.75167	0.999997	1359	0	0.33819	0.24858	0.24856	0.999997	581	1	0.33819
NonTargeting_Human_0301	1	0.75207	0.7524	0.999997	1360	0	0.60499	0.24793	0.2479	0.999997	579	1	0.60499
NonTargeting_Human_0755	1	0.75215	0.75251	0.999997	1361	0	0.47263	0.24785	0.24786	0.999997	578	1	0.47263
NonTargeting_Human_0772	1	0.75224	0.75259	0.999997	1362	0	0.54356	0.24776	0.24779	0.999997	577	1	0.54356
NonTargeting_Human_0403	1	0.75232	0.75269	0.999997	1363	0	0.47921	0.24768	0.24771	0.999997	576	1	0.47921
MRPL28	15	0.75259	0.90085	0.999997	1364	3	-0.33949	0.5831	0.81653	0.999997	1158	2	-0.33949
NonTargeting_Human_0670	1	0.75273	0.75308	0.999997	1365	0	0.3291	0.24727	0.24736	0.999997	574	1	0.3291
GPR152	15	0.75291	0.90095	0.999997	1366	2	0.19952	0.13555	0.37011	0.999997	360	5	0.19952
NonTargeting_Human_0018	1	0.75314	0.75346	0.999997	1367	0	0.36871	0.24686	0.24684	0.999997	572	1	0.36871
NonTargeting_Human_0622	1	0.75412	0.75448	0.999997	1368	0	0.49403	0.24588	0.24584	0.999997	571	1	0.49403
NDNL2	15	0.75457	0.90173	0.999997	1369	2	0.25834	0.058701	0.20734	0.999997	200	7	0.25834
NonTargeting_Human_0873	1	0.75486	0.75526	0.999997	1370	0	0.28646	0.24514	0.2452	0.999997	570	1	0.28646
NonTargeting_Human_0528	1	0.75494	0.75533	0.999997	1371	0	0.31033	0.24506	0.24514	0.999997	569	1	0.31033
NonTargeting_Human_0555	1	0.75544	0.7558	0.999997	1372	0	0.37071	0.24456	0.2447	0.999997	568	1	0.37071
NonTargeting_Human_0574	1	0.75593	0.7563	0.999997	1373	0	0.49614	0.24407	0.24409	0.999997	567	1	0.49614
NonTargeting_Human_0756	1	0.75658	0.75701	0.999997	1374	0	0.2933	0.24342	0.24338	0.999997	566	1	0.2933
NonTargeting_Human_0740	1	0.75667	0.75709	0.999997	1375	0	0.62488	0.24333	0.24329	0.999997	565	1	0.62488
NonTargeting_Human_0802	1	0.75724	0.75771	0.999997	1376	0	0.67245	0.24276	0.24264	0.999997	563	1	0.67245
NonTargeting_Human_0489	1	0.75745	0.75792	0.999997	1377	0	0.45618	0.24255	0.24245	0.999997	562	1	0.45618
NonTargeting_Human_0065	1	0.75864	0.75903	0.999997	1378	0	0.30331	0.24136	0.24133	0.999997	561	1	0.30331
NonTargeting_Human_0665	1	0.76069	0.76103	0.999997	1379	0	0.37271	0.23931	0.23923	0.999997	559	1	0.37271
NonTargeting_Human_0922	1	0.76167	0.76205	0.999997	1380	0	0.47809	0.23833	0.2382	0.999997	557	1	0.47809
NonTargeting_Human_0359	1	0.76175	0.7621	0.999997	1381	0	0.58313	0.23825	0.23815	0.999997	556	1	0.58313
NonTargeting_Human_0906	1	0.76307	0.76334	0.999997	1382	0	0.38393	0.23693	0.23691	0.999997	554	1	0.38393
NAA60	15	0.76319	0.90532	0.999997	1383	3	0.25183	0.026624	0.11403	0.911274	130	8	0.25183
TBC1D25	15	0.76434	0.9058	0.999997	1384	1	0.38162	0.010367	0.053938	0.836283	81	9	0.38162
NonTargeting_Human_0550	1	0.76479	0.76507	0.999997	1385	0	0.52601	0.23521	0.23516	0.999997	551	1	0.52601
NonTargeting_Human_0333	1	0.76487	0.76514	0.999997	1386	0	0.3168	0.23513	0.23507	0.999997	550	1	0.3168
NonTargeting_Human_0154	1	0.76619	0.76665	0.999997	1387	0	0.47508	0.23381	0.23385	0.999997	549	1	0.47508
GOLGA6A	15	0.76625	0.90654	0.999997	1388	2	0.15936	0.40722	0.69429	0.999997	870	2	0.15936
NonTargeting_Human_0558	1	0.76684	0.76734	0.999997	1389	0	0.41335	0.23316	0.23312	0.999997	546	1	0.41335
NonTargeting_Human_0117	1	0.76725	0.76775	0.999997	1390	0	0.41176	0.23275	0.23276	0.999997	545	1	0.41176
NonTargeting_Human_0163	1	0.7675	0.76804	0.999997	1391	0	0.44955	0.2325	0.23253	0.999997	544	1	0.44955
NonTargeting_Human_0607	1	0.76807	0.76864	0.999997	1392	0	0.73377	0.23193	0.23187	0.999997	543	1	0.73377
AGAP4	15	0.77127	0.90868	0.999997	1393	2	0.097518	0.33806	0.62954	0.999997	752	5	0.097518
NonTargeting_Human_0925	1	0.77168	0.77217	0.999997	1394	0	0.69309	0.22832	0.22839	0.999997	538	1	0.69309
hsa-mir-532	15	0.77214	0.909	0.999997	1395	2	0.38645	0.0028745	0.018098	0.528465	52	7	0.38645
NonTargeting_Human_0350	1	0.77291	0.7734	0.999997	1396	0	0.56013	0.22709	0.22702	0.999997	534	1	0.56013
NonTargeting_Human_0169	1	0.7732	0.77371	0.999997	1397	0	0.63517	0.2268	0.22673	0.999997	533	1	0.63517
NonTargeting_Human_0110	1	0.77341	0.77389	0.999997	1398	0	0.44059	0.22659	0.22646	0.999997	532	1	0.44059
NonTargeting_Human_0087	1	0.7739	0.77436	0.999997	1399	0	0.54654	0.2261	0.22596	0.999997	530	1	0.54654
NonTargeting_Human_0054	1	0.77414	0.7746	0.999997	1400	0	0.41727	0.22586	0.22569	0.999997	528	1	0.41727
NonTargeting_Human_0793	1	0.77427	0.77469	0.999997	1401	0	0.45014	0.22573	0.22558	0.999997	527	1	0.45014
NonTargeting_Human_0986	1	0.77464	0.77514	0.999997	1402	0	0.40263	0.22536	0.2252	0.999997	525	1	0.40263
NonTargeting_Human_0582	1	0.77472	0.77521	0.999997	1403	0	0.62397	0.22528	0.2251	0.999997	524	1	0.62397
NonTargeting_Human_0226	1	0.77488	0.77534	0.999997	1404	0	0.37978	0.22512	0.22492	0.999997	522	1	0.37978
AIM1	15	0.77497	0.91017	0.999997	1405	2	0.17111	0.038074	0.15172	0.991804	158	7	0.17111
TCP10	15	0.77498	0.91018	0.999997	1406	3	0.31576	0.034938	0.14167	0.984405	146	8	0.31576
NonTargeting_Human_0714	1	0.77562	0.77609	0.999997	1407	0	0.88891	0.22438	0.22406	0.999997	521	1	0.88891
SUSD5	15	0.77588	0.91059	0.999997	1408	2	0.22194	0.096324	0.29425	0.999997	284	6	0.22194
NonTargeting_Human_0560	1	0.77685	0.77754	0.999997	1409	0	0.74194	0.22315	0.22279	0.999997	520	1	0.74194
NonTargeting_Human_0030	1	0.77702	0.77767	0.999997	1410	0	0.41541	0.22298	0.22263	0.999997	519	1	0.41541
NonTargeting_Human_0534	1	0.77734	0.77804	0.999997	1411	0	0.35285	0.22266	0.22236	0.999997	518	1	0.35285
DDX52	15	0.77839	0.91167	0.999997	1412	3	0.025593	0.11681	0.33792	0.999997	333	5	0.025593
NonTargeting_Human_0356	1	0.77874	0.77939	0.999997	1413	0	0.52524	0.22126	0.22096	0.999997	514	1	0.52524
NonTargeting_Human_0835	1	0.77915	0.77975	0.999997	1414	0	0.60127	0.22085	0.22054	0.999997	513	1	0.60127
ZFR	15	0.78004	0.91241	0.999997	1415	2	0.078628	0.28218	0.57533	0.999997	640	5	0.078628
NonTargeting_Human_0039	1	0.78079	0.78151	0.999997	1416	0	0.44149	0.21921	0.21906	0.999997	512	1	0.44149
NonTargeting_Human_0337	1	0.78153	0.78223	0.999997	1417	0	0.3001	0.21847	0.21832	0.999997	509	1	0.3001
NonTargeting_Human_0329	1	0.78227	0.78292	0.999997	1418	0	0.43873	0.21773	0.21756	0.999997	507	1	0.43873
CCZ1	15	0.78309	0.91375	0.999997	1419	3	0.4596	0.0011796	0.0081915	0.348625	40	7	0.4596
NonTargeting_Human_0923	1	0.78416	0.78482	0.999997	1420	0	0.47718	0.21584	0.21559	0.999997	505	1	0.47718
NonTargeting_Human_0794	1	0.78448	0.78515	0.999997	1421	0	0.88749	0.21552	0.21532	0.999997	504	1	0.88749
NonTargeting_Human_0193	1	0.78457	0.78524	0.999997	1422	0	0.43457	0.21543	0.21518	0.999997	503	1	0.43457
DPY30	15	0.78531	0.91471	0.999997	1423	3	0.22084	0.064177	0.22057	0.999997	209	7	0.22084
CTNNBIP1	15	0.78552	0.91482	0.999997	1424	3	-0.023465	0.65287	0.85945	0.999997	1277	3	-0.023465
NonTargeting_Human_0377	1	0.78563	0.78637	0.999997	1425	0	0.52917	0.21437	0.21412	0.999997	501	1	0.52917
ISG15	15	0.78661	0.91535	0.999997	1426	3	0.17852	0.39498	0.68317	0.999997	855	5	0.17852
TP53TG3	15	0.78696	0.91551	0.999997	1427	3	0.17389	0.022079	0.098527	0.901014	114	6	0.17389
NonTargeting_Human_0143	1	0.78744	0.78813	0.999997	1428	0	0.95261	0.21256	0.21224	0.999997	499	1	0.95261
NonTargeting_Human_0648	1	0.78781	0.78851	0.999997	1429	0	0.53756	0.21219	0.21186	0.999997	498	1	0.53756
NonTargeting_Human_0685	1	0.78809	0.78873	0.999997	1430	0	0.93079	0.21191	0.21151	0.999997	496	1	0.93079
NonTargeting_Human_0255	1	0.78818	0.7888	0.999997	1431	0	0.4639	0.21182	0.21144	0.999997	495	1	0.4639
GTF2E1	15	0.78841	0.91607	0.999997	1432	3	0.2098	0.47381	0.75028	0.999997	990	4	0.2098
NonTargeting_Human_0615	1	0.78875	0.78935	0.999997	1433	0	0.44037	0.21125	0.21092	0.999997	493	1	0.44037
NonTargeting_Human_0637	1	0.79056	0.79106	0.999997	1434	0	0.39326	0.20944	0.20917	0.999997	491	1	0.39326
ZDHHC5	15	0.79092	0.91718	0.999997	1435	2	0.29385	0.31022	0.60264	0.999997	701	5	0.29385
NonTargeting_Human_0222	1	0.79117	0.79167	0.999997	1436	0	1.0328	0.20883	0.2085	0.999997	490	1	1.0328
NonTargeting_Human_0961	1	0.79134	0.79186	0.999997	1437	0	0.54393	0.20866	0.20834	0.999997	489	1	0.54393
ZNF764	15	0.79179	0.9176	0.999997	1438	2	0.051139	0.86471	0.95168	0.999997	1571	2	0.051139
NonTargeting_Human_0745	1	0.79195	0.79244	0.999997	1439	0	0.44685	0.20805	0.2079	0.999997	488	1	0.44685
FBXL8	15	0.79308	0.91821	0.999997	1440	3	0.13635	0.069827	0.23395	0.999997	222	6	0.13635
NonTargeting_Human_0968	1	0.7931	0.7935	0.999997	1441	0	0.42776	0.2069	0.20678	0.999997	487	1	0.42776
VHL	15	0.79407	0.91859	0.999997	1442	2	0.22757	0.37735	0.66705	0.999997	811	5	0.22757
NonTargeting_Human_0316	1	0.79417	0.79465	0.999997	1443	0	0.51125	0.20583	0.20569	0.999997	484	1	0.51125
NonTargeting_Human_0983	1	0.79572	0.79637	0.999997	1444	0	0.51516	0.20428	0.20421	0.999997	482	1	0.51516
NonTargeting_Human_0782	1	0.79581	0.79645	0.999997	1445	0	0.77211	0.20419	0.20409	0.999997	481	1	0.77211
NonTargeting_Human_0262	1	0.79622	0.7968	0.999997	1446	0	0.37844	0.20378	0.20362	0.999997	479	1	0.37844
ZNF124	15	0.79808	0.92055	0.999997	1447	3	0.39212	0.099281	0.30097	0.999997	294	7	0.39212
TNFRSF8	15	0.79824	0.92061	0.999997	1448	3	0.27664	0.069932	0.23418	0.999997	223	7	0.27664
NonTargeting_Human_0691	1	0.79958	0.80012	0.999997	1449	0	0.43356	0.20042	0.2001	0.999997	473	1	0.43356
HNRNPM	15	0.79984	0.92124	0.999997	1450	2	0.44734	0.069395	0.23287	0.999997	221	7	0.44734
NonTargeting_Human_0958	1	0.80024	0.8008	0.999997	1451	0	0.31467	0.19976	0.19947	0.999997	472	1	0.31467
NonTargeting_Human_0666	1	0.80114	0.80171	0.999997	1452	0	0.52963	0.19886	0.19853	0.999997	470	1	0.52963
NonTargeting_Human_0649	1	0.80196	0.80249	0.999997	1453	0	0.49644	0.19804	0.19776	0.999997	467	1	0.49644
SYP	15	0.80245	0.92238	0.999997	1454	3	0.28442	0.22522	0.50502	0.999997	523	6	0.28442
PRR3	15	0.80396	0.92298	0.999997	1455	2	0.29487	0.066392	0.22579	0.999997	213	6	0.29487
NonTargeting_Human_0271	1	0.80459	0.80508	0.999997	1456	0	0.58518	0.19541	0.19509	0.999997	464	1	0.58518
ZBTB10	15	0.80483	0.92334	0.999997	1457	2	0.29095	0.11634	0.33704	0.999997	332	6	0.29095
CLDND2	15	0.80523	0.92358	0.999997	1458	3	0.2707	0.062689	0.2172	0.999997	206	7	0.2707
PIK3R4	15	0.8061	0.92398	0.999997	1459	2	0.71205	0.0011156	0.0078298	0.348625	38	10	0.71205
SLC35B2	15	0.80821	0.925	0.999997	1460	3	-0.061586	0.67057	0.86981	0.999997	1306	4	-0.061586
SNAPC2	15	0.80955	0.92564	0.999997	1461	3	-0.16851	0.17235	0.42778	0.999997	423	3	-0.16851
NonTargeting_Human_0445	1	0.8114	0.81138	0.999997	1462	0	0.75984	0.1886	0.18855	0.999997	453	1	0.75984
NonTargeting_Human_0768	1	0.81271	0.8127	0.999997	1463	0	0.64106	0.18729	0.18718	0.999997	451	1	0.64106
NonTargeting_Human_0457	1	0.81509	0.81494	0.999997	1464	0	0.69678	0.18491	0.18465	0.999997	449	1	0.69678
EGLN2	15	0.81553	0.92849	0.999997	1465	2	0.29819	0.053758	0.19481	0.999997	192	7	0.29819
ALDH3A2	15	0.81615	0.92882	0.999997	1466	2	0.41146	0.020245	0.092333	0.901014	109	8	0.41146
NonTargeting_Human_0711	1	0.81632	0.81616	0.999997	1467	0	0.49859	0.18368	0.18358	0.999997	448	1	0.49859
NonTargeting_Human_0902	1	0.81673	0.81662	0.999997	1468	0	0.51731	0.18327	0.18321	0.999997	447	1	0.51731
DAZ1	15	0.81674	0.9291	0.999997	1469	1	0.061581	0.29894	0.59153	0.999997	675	5	0.061581
NonTargeting_Human_0409	1	0.81788	0.81777	0.999997	1470	0	0.46947	0.18212	0.18209	0.999997	445	1	0.46947
NonTargeting_Human_0486	1	0.81854	0.81837	0.999997	1471	0	0.60813	0.18146	0.18144	0.999997	444	1	0.60813
NonTargeting_Human_0034	1	0.8187	0.81852	0.999997	1472	0	0.64114	0.1813	0.18131	0.999997	443	1	0.64114
STAM2	15	0.8192	0.93015	0.999997	1473	2	0.41926	0.065929	0.2247	0.999997	212	7	0.41926
NonTargeting_Human_0080	1	0.81936	0.81903	0.999997	1474	0	0.56579	0.18064	0.1806	0.999997	441	1	0.56579
NonTargeting_Human_0015	1	0.81944	0.81911	0.999997	1475	0	0.47246	0.18056	0.18052	0.999997	440	1	0.47246
NonTargeting_Human_0753	1	0.8201	0.81981	0.999997	1476	0	0.56127	0.1799	0.17993	0.999997	438	1	0.56127
NonTargeting_Human_0461	1	0.82116	0.82095	0.999997	1477	0	0.42379	0.17884	0.17898	0.999997	437	1	0.42379
NonTargeting_Human_0001	1	0.82149	0.82128	0.999997	1478	0	0.57073	0.17851	0.17872	0.999997	436	1	0.57073
NonTargeting_Human_0674	1	0.82165	0.82138	0.999997	1479	0	0.47014	0.17835	0.17859	0.999997	434	1	0.47014
NonTargeting_Human_0504	1	0.82247	0.82223	0.999997	1480	0	0.52981	0.17753	0.17789	0.999997	432	1	0.52981
ELP5	15	0.82271	0.93174	0.999997	1481	1	0.24986	0.30346	0.59577	0.999997	690	5	0.24986
NonTargeting_Human_0279	1	0.82289	0.82264	0.999997	1482	0	0.54577	0.17711	0.17748	0.999997	431	1	0.54577
VPS29	15	0.8234	0.93203	0.999997	1483	2	0.38673	0.027875	0.11832	0.921298	135	7	0.38673
NonTargeting_Human_0606	1	0.82362	0.82341	0.999997	1484	0	0.6915	0.17638	0.17669	0.999997	430	1	0.6915
DCAF4	15	0.82399	0.93236	0.999997	1485	2	0.019565	0.57483	0.81149	0.999997	1149	3	0.019565
NonTargeting_Human_0314	1	0.82518	0.82506	0.999997	1486	0	0.64092	0.17482	0.17532	0.999997	428	1	0.64092
NonTargeting_Human_0810	1	0.82666	0.82645	0.999997	1487	0	0.92686	0.17334	0.17377	0.999997	426	1	0.92686
NonTargeting_Human_0646	1	0.82789	0.82769	0.999997	1488	0	0.57832	0.17211	0.1725	0.999997	422	1	0.57832
SRCAP	15	0.82839	0.9345	0.999997	1489	3	0.20842	0.23066	0.51244	0.999997	541	6	0.20842
NonTargeting_Human_0037	1	0.82846	0.82825	0.999997	1490	0	0.53844	0.17154	0.17191	0.999997	421	1	0.53844
SVOP	15	0.82892	0.93476	0.999997	1491	3	0.46049	0.0023582	0.01508	0.489274	47	9	0.46049
NonTargeting_Human_0415	1	0.82896	0.82867	0.999997	1492	0	0.60159	0.17104	0.17138	0.999997	420	1	0.60159
CIAO1	15	0.82927	0.93495	0.999997	1493	3	0.24618	0.019436	0.089213	0.901014	102	7	0.24618
BMI1	15	0.8324	0.93641	0.999997	1494	3	0.37084	0.026545	0.11381	0.911274	129	7	0.37084
NonTargeting_Human_0707	1	0.8324	0.83214	0.999997	1495	0	0.5442	0.1676	0.16801	0.999997	417	1	0.5442
WDR7	15	0.83261	0.93656	0.999997	1496	3	0.90086	0.00065356	0.0050268	0.251627	34	9	0.90086
NUDT5	15	0.83274	0.93665	0.999997	1497	3	0.33588	0.011677	0.059827	0.870755	86	7	0.33588
NonTargeting_Human_0594	1	0.83339	0.83305	0.999997	1498	0	0.71109	0.16661	0.16709	0.999997	416	1	0.71109
MED20	15	0.83361	0.93703	0.999997	1499	3	-0.067398	0.83101	0.93636	0.999997	1518	3	-0.067398
NonTargeting_Human_0462	1	0.83396	0.83362	0.999997	1500	0	0.6145	0.16604	0.16657	0.999997	415	1	0.6145
ABCB4	15	0.83515	0.93783	0.999997	1501	3	0.30111	0.038349	0.15267	0.991804	161	8	0.30111
NonTargeting_Human_0248	1	0.837	0.83682	0.999997	1502	0	0.54711	0.163	0.16354	0.998327	409	1	0.54711
NonTargeting_Human_0874	1	0.83724	0.83711	0.999997	1503	0	0.67668	0.16276	0.16337	0.998327	408	1	0.67668
NonTargeting_Human_0239	1	0.83749	0.83737	0.999997	1504	0	0.60175	0.16251	0.16311	0.998327	407	1	0.60175
NonTargeting_Human_0568	1	0.83934	0.83923	0.999997	1505	0	0.61627	0.16066	0.16125	0.994753	406	1	0.61627
SQLE	15	0.83954	0.93988	0.999997	1506	3	0.2692	0.0077125	0.041856	0.772041	68	7	0.2692
NonTargeting_Human_0276	1	0.84003	0.83999	0.999997	1507	0	0.60428	0.15997	0.16053	0.99379	405	1	0.60428
NonTargeting_Human_0682	1	0.84044	0.84041	0.999997	1508	0	0.79133	0.15956	0.16016	0.99379	404	1	0.79133
NonTargeting_Human_0916	1	0.84094	0.84099	0.999997	1509	0	0.52928	0.15906	0.15965	0.99379	403	1	0.52928
NonTargeting_Human_0856	1	0.84143	0.84146	0.999997	1510	0	0.68272	0.15857	0.1592	0.99379	402	1	0.68272
SBK1	15	0.84154	0.94085	0.999997	1511	3	-0.12809	0.54513	0.79389	0.999997	1108	4	-0.12809
NonTargeting_Human_0176	1	0.84282	0.84292	0.999997	1512	0	0.52386	0.15718	0.15767	0.99379	399	1	0.52386
FER	15	0.84319	0.9416	0.999997	1513	3	0.027542	0.61575	0.83702	0.999997	1208	4	0.027542
NonTargeting_Human_0234	1	0.84323	0.84338	0.999997	1514	0	0.4676	0.15677	0.1573	0.99379	398	1	0.4676
NonTargeting_Human_0091	1	0.84406	0.84413	0.999997	1515	0	0.543	0.15594	0.15642	0.99379	394	1	0.543
NonTargeting_Human_0397	1	0.84438	0.84438	0.999997	1516	0	0.55892	0.15562	0.15616	0.99379	393	1	0.55892
KCNU1	15	0.84525	0.94262	0.999997	1517	2	-0.067348	0.096561	0.29478	0.999997	286	6	-0.067348
NonTargeting_Human_0660	1	0.84611	0.84615	0.999997	1518	0	0.64854	0.15389	0.15461	0.99379	387	1	0.64854
LYZ	15	0.8476	0.94391	0.999997	1519	2	0.21339	0.25113	0.541	0.999997	590	5	0.21339
NonTargeting_Human_0791	1	0.84791	0.84796	0.999997	1520	0	0.76788	0.15209	0.15285	0.991804	386	1	0.76788
NonTargeting_Human_0348	1	0.84832	0.84833	0.999997	1521	0	0.55829	0.15168	0.15242	0.991804	385	1	0.55829
NonTargeting_Human_0342	1	0.8489	0.84888	0.999997	1522	0	0.52767	0.1511	0.15198	0.991804	384	1	0.52767
PGM3	15	0.84908	0.94463	0.999997	1523	1	0.48421	0.0057643	0.032537	0.712562	62	8	0.48421
TRA2B	15	0.84925	0.94474	0.999997	1524	2	0.12058	0.23352	0.51648	0.999997	547	4	0.12058
TMEM183A	15	0.8496	0.94489	0.999997	1525	2	0.059006	0.21476	0.48985	0.999997	502	6	0.059006
NonTargeting_Human_0777	1	0.85062	0.85045	0.999997	1526	0	0.84642	0.14938	0.1502	0.991804	383	1	0.84642
NDUFB10	15	0.85108	0.94565	0.999997	1527	3	0.15979	0.47639	0.75207	0.999997	997	4	0.15979
NonTargeting_Human_0569	1	0.85119	0.85103	0.999997	1528	0	0.84337	0.14881	0.14967	0.991804	381	1	0.84337
NonTargeting_Human_0881	1	0.85144	0.85126	0.999997	1529	0	0.78264	0.14856	0.14939	0.991804	380	1	0.78264
NonTargeting_Human_0959	1	0.85251	0.85238	0.999997	1530	0	0.642	0.14749	0.14839	0.991804	379	1	0.642
NonTargeting_Human_0323	1	0.85292	0.85278	0.999997	1531	0	0.63842	0.14708	0.14798	0.991804	378	1	0.63842
CARM1	15	0.85304	0.94619	0.999997	1532	2	0.092256	0.23584	0.51957	0.999997	552	6	0.092256
FRYL	15	0.85427	0.94647	0.999997	1533	2	0.60293	0.0032317	0.020155	0.54326	55	9	0.60293
NonTargeting_Human_0910	1	0.85759	0.85769	0.999997	1534	0	0.5252	0.14241	0.14358	0.990391	370	1	0.5252
NonTargeting_Human_0896	1	0.85899	0.85909	0.999997	1535	0	0.53916	0.14101	0.14215	0.984405	367	1	0.53916
NonTargeting_Human_0527	1	0.85907	0.85912	0.999997	1536	0	0.45655	0.14093	0.14206	0.984405	366	1	0.45655
NonTargeting_Human_0526	1	0.86063	0.8607	0.999997	1537	0	0.64048	0.13937	0.14052	0.984405	364	1	0.64048
VOPP1	15	0.86105	0.94814	0.999997	1538	1	-0.093231	0.2725	0.56565	0.999997	627	5	-0.093231
NonTargeting_Human_0325	1	0.86161	0.86167	0.999997	1539	0	0.73311	0.13839	0.1395	0.98157	363	1	0.73311
CLEC3B	15	0.86279	0.94862	0.999997	1540	1	0.29931	0.032924	0.13522	0.963716	145	6	0.29931
NonTargeting_Human_0503	1	0.86432	0.86444	0.999997	1541	0	0.70851	0.13568	0.13676	0.970036	361	1	0.70851
NonTargeting_Human_0242	1	0.86572	0.86574	0.999997	1542	0	0.54136	0.13428	0.13532	0.963716	359	1	0.54136
NonTargeting_Human_0864	1	0.8658	0.86581	0.999997	1543	0	0.5776	0.1342	0.13523	0.963716	357	1	0.5776
PDGFA	15	0.86828	0.95024	0.999997	1544	1	0.11508	0.068423	0.23068	0.999997	218	6	0.11508
NonTargeting_Human_0540	1	0.86884	0.86874	0.999997	1545	0	0.48883	0.13116	0.13216	0.960786	355	1	0.48883
NonTargeting_Human_0282	1	0.8713	0.87112	0.999997	1546	0	0.53632	0.1287	0.1298	0.947504	352	1	0.53632
NonTargeting_Human_0391	1	0.87327	0.87312	0.999997	1547	0	0.6264	0.12673	0.12787	0.937383	350	1	0.6264
NonTargeting_Human_0721	1	0.87429	0.87405	0.999997	1548	0	0.92052	0.12571	0.12686	0.937383	349	1	0.92052
NonTargeting_Human_0496	1	0.87589	0.87564	0.999997	1549	0	0.93497	0.12411	0.12539	0.937383	347	1	0.93497
NonTargeting_Human_0112	1	0.87737	0.87718	0.999997	1550	0	0.81366	0.12263	0.12387	0.931394	346	1	0.81366
NonTargeting_Human_0482	1	0.87794	0.87771	0.999997	1551	0	0.79426	0.12206	0.12325	0.930714	344	1	0.79426
NonTargeting_Human_0463	1	0.87868	0.87844	0.999997	1552	0	0.72088	0.12132	0.1225	0.930543	343	1	0.72088
NonTargeting_Human_0173	1	0.87893	0.87868	0.999997	1553	0	0.8222	0.12107	0.12227	0.930543	341	1	0.8222
NonTargeting_Human_0048	1	0.87901	0.8788	0.999997	1554	0	0.79665	0.12099	0.12217	0.930543	340	1	0.79665
NonTargeting_Human_0272	1	0.88114	0.88106	0.999997	1555	0	0.77838	0.11886	0.1201	0.930543	334	1	0.77838
PSMD9	15	0.88452	0.95459	0.999997	1556	1	0.35453	0.01586	0.076187	0.901014	93	8	0.35453
NonTargeting_Human_0392	1	0.88475	0.88472	0.999997	1557	0	0.59791	0.11525	0.11648	0.915087	330	1	0.59791
RALGAPB	15	0.885	0.95473	0.999997	1558	2	0.57025	0.0097999	0.051486	0.805384	80	9	0.57025
NonTargeting_Human_0477	1	0.88516	0.8852	0.999997	1559	0	0.76566	0.11484	0.11609	0.915087	327	1	0.76566
NonTargeting_Human_0293	1	0.88623	0.88647	0.999997	1560	0	0.92813	0.11377	0.11499	0.911586	325	1	0.92813
NonTargeting_Human_0311	1	0.88713	0.88735	0.999997	1561	0	0.73721	0.11287	0.11407	0.911274	323	1	0.73721
NonTargeting_Human_0993	1	0.88787	0.8881	0.999997	1562	0	0.67443	0.11213	0.11341	0.911274	320	1	0.67443
NonTargeting_Human_0302	1	0.88845	0.88864	0.999997	1563	0	0.61771	0.11155	0.11287	0.911274	319	1	0.61771
NonTargeting_Human_0470	1	0.88968	0.88987	0.999997	1564	0	0.60195	0.11032	0.11165	0.911274	318	1	0.60195
NonTargeting_Human_0727	1	0.89066	0.8908	0.999997	1565	0	0.78797	0.10934	0.11078	0.911274	316	1	0.78797
NonTargeting_Human_0775	1	0.89099	0.89118	0.999997	1566	0	0.72514	0.10901	0.11039	0.911274	314	1	0.72514
NonTargeting_Human_0229	1	0.89156	0.89182	0.999997	1567	0	0.52343	0.10844	0.10971	0.911274	313	1	0.52343
NonTargeting_Human_0132	1	0.89378	0.89409	0.999997	1568	0	0.82706	0.10622	0.10737	0.908763	312	1	0.82706
C7orf26	15	0.89384	0.95722	0.999997	1569	1	0.70767	0.0025592	0.016284	0.491891	50	8	0.70767
NonTargeting_Human_0294	1	0.89575	0.89604	0.999997	1570	0	0.92397	0.10425	0.10543	0.901014	308	1	0.92397
NonTargeting_Human_0585	1	0.89616	0.89643	0.999997	1571	0	0.78388	0.10384	0.105	0.901014	307	1	0.78388
NonTargeting_Human_0109	1	0.89641	0.89668	0.999997	1572	0	0.60095	0.10359	0.10475	0.901014	306	1	0.60095
NonTargeting_Human_0013	1	0.89649	0.89675	0.999997	1573	0	0.6171	0.10351	0.10466	0.901014	305	1	0.6171
NonTargeting_Human_0237	1	0.89657	0.89684	0.999997	1574	0	1.4219	0.10343	0.10456	0.901014	304	1	1.4219
CAPZA1	15	0.89757	0.95814	0.999997	1575	2	-0.0086446	0.39189	0.68031	0.999997	846	1	-0.0086446
NonTargeting_Human_0822	1	0.8978	0.89809	0.999997	1576	0	0.97938	0.1022	0.10334	0.901014	303	1	0.97938
NonTargeting_Human_0264	1	0.89813	0.89844	0.999997	1577	0	0.93319	0.10187	0.10304	0.901014	301	1	0.93319
BMP15	15	0.89958	0.95871	0.999997	1578	2	0.0493	0.0982	0.29859	0.999997	291	4	0.0493
NonTargeting_Human_0020	1	0.89961	0.89994	0.999997	1579	0	0.56895	0.10039	0.10153	0.901014	298	1	0.56895
NonTargeting_Human_0076	1	0.90018	0.90066	0.999997	1580	0	0.81431	0.099819	0.10081	0.901014	296	1	0.81431
NonTargeting_Human_0867	1	0.90051	0.90104	0.999997	1581	0	0.79187	0.099491	0.10041	0.901014	295	1	0.79187
TRIM8	15	0.90118	0.95935	0.999997	1582	2	0.2573	0.54924	0.79612	0.999997	1114	4	0.2573
PEX6	15	0.9016	0.95946	0.999997	1583	1	0.32236	0.030595	0.12738	0.937383	140	8	0.32236
NonTargeting_Human_0267	1	0.90264	0.90309	0.999997	1584	0	0.61909	0.097358	0.09821	0.901014	288	1	0.61909
NonTargeting_Human_0167	1	0.90272	0.90317	0.999997	1585	0	0.80606	0.097276	0.098103	0.901014	287	1	0.80606
NonTargeting_Human_0863	1	0.90363	0.90401	0.999997	1586	0	0.7272	0.096373	0.097142	0.901014	285	1	0.7272
hsa-mir-1229	15	0.90372	0.96014	0.999997	1587	2	0.4844	0.0020094	0.013035	0.466054	44	10	0.4844
ATP6V0D1	15	0.90439	0.96039	0.999997	1588	1	0.67555	0.0020721	0.013391	0.469059	45	7	0.67555
NonTargeting_Human_0750	1	0.90486	0.90525	0.999997	1589	0	1.5662	0.095142	0.096085	0.901014	282	1	1.5662
NonTargeting_Human_0118	1	0.90543	0.90576	0.999997	1590	0	0.82098	0.094568	0.095481	0.901014	281	1	0.82098
NonTargeting_Human_0676	1	0.9056	0.90597	0.999997	1591	0	1.1923	0.094404	0.095243	0.901014	280	1	1.1923
NonTargeting_Human_0763	1	0.90666	0.90696	0.999997	1592	0	1.1657	0.093337	0.094153	0.901014	279	1	1.1657
NonTargeting_Human_0144	1	0.90732	0.90766	0.999997	1593	0	1.0069	0.092681	0.093395	0.901014	277	1	1.0069
CCT6B	15	0.90864	0.9616	0.999997	1594	2	0.03562	0.08068	0.25904	0.999997	251	7	0.03562
FAM104A	15	0.90883	0.96167	0.999997	1595	1	0.34831	0.032765	0.13463	0.963716	143	8	0.34831
SPAG7	15	0.90887	0.96169	0.999997	1596	2	0.14084	0.30401	0.59637	0.999997	691	4	0.14084
NonTargeting_Human_0246	1	0.90904	0.90941	0.999997	1597	0	1.1621	0.090958	0.091655	0.901014	275	1	1.1621
NonTargeting_Human_0781	1	0.91027	0.91053	0.999997	1598	0	0.80188	0.089727	0.090372	0.901014	274	1	0.80188
NonTargeting_Human_0717	1	0.91085	0.91107	0.999997	1599	0	0.75262	0.089152	0.08979	0.901014	273	1	0.75262
CUL7	15	0.91181	0.96281	0.999997	1600	1	0.65324	0.00029952	0.0023198	0.150106	26	10	0.65324
NonTargeting_Human_0614	1	0.91183	0.91204	0.999997	1601	0	0.84288	0.088168	0.088846	0.901014	270	1	0.84288
NonTargeting_Human_0680	1	0.91257	0.91289	0.999997	1602	0	1.0788	0.087429	0.088162	0.901014	268	1	1.0788
NonTargeting_Human_0667	1	0.91306	0.91339	0.999997	1603	0	1.0597	0.086937	0.087597	0.901014	267	1	1.0597
NonTargeting_Human_0726	1	0.91397	0.9142	0.999997	1604	0	0.80627	0.086034	0.086834	0.901014	265	1	0.80627
NonTargeting_Human_0141	1	0.91413	0.91441	0.999997	1605	0	0.51916	0.08587	0.08667	0.901014	264	1	0.51916
NonTargeting_Human_0911	1	0.91421	0.91448	0.999997	1606	0	1.2578	0.085788	0.086603	0.901014	263	1	1.2578
NonTargeting_Human_0654	1	0.91528	0.91553	0.999997	1607	0	0.77759	0.084721	0.085664	0.901014	259	1	0.77759
FAM110D	15	0.91654	0.96438	0.999997	1608	2	0.28592	0.0043669	0.025829	0.616832	60	7	0.28592
NonTargeting_Human_0061	1	0.91741	0.91777	0.999997	1609	0	0.82862	0.082588	0.083528	0.901014	255	1	0.82862
CLK2	15	0.91762	0.96467	0.999997	1610	1	0.044041	0.42359	0.70942	0.999997	895	1	0.044041
NonTargeting_Human_0783	1	0.91766	0.91801	0.999997	1611	0	1.7664	0.082342	0.083325	0.901014	254	1	1.7664
NonTargeting_Human_0441	1	0.91807	0.91831	0.999997	1612	0	1.2952	0.081932	0.082969	0.901014	253	1	1.2952
NonTargeting_Human_0644	1	0.92028	0.92055	0.999997	1613	0	0.73639	0.079716	0.080612	0.901014	250	1	0.73639
NonTargeting_Human_0580	1	0.92094	0.92122	0.999997	1614	0	0.87099	0.07906	0.079923	0.901014	249	1	0.87099
NonTargeting_Human_0367	1	0.92127	0.9215	0.999997	1615	0	0.81316	0.078731	0.079589	0.901014	248	1	0.81316
NonTargeting_Human_0509	1	0.92135	0.92159	0.999997	1616	0	0.92282	0.078649	0.079527	0.901014	247	1	0.92282
GPBP1L1	15	0.92137	0.96582	0.999997	1617	1	0.37354	0.19069	0.45493	0.999997	458	5	0.37354
NonTargeting_Human_0447	1	0.92193	0.92215	0.999997	1618	0	0.83617	0.078075	0.078979	0.901014	246	1	0.83617
CCDC178	15	0.92195	0.96593	0.999997	1619	2	-0.15858	0.9969	0.99677	0.999997	1723	0	-0.15858
NonTargeting_Human_0591	1	0.92266	0.92285	0.999997	1620	0	0.92813	0.077337	0.07825	0.901014	243	1	0.92813
RAP1GAP	15	0.92311	0.96634	0.999997	1621	2	0.17827	0.14535	0.3851	0.999997	374	4	0.17827
NonTargeting_Human_0664	1	0.92316	0.92341	0.999997	1622	0	0.73621	0.076844	0.077668	0.901014	242	1	0.73621
NonTargeting_Human_0165	1	0.92324	0.92351	0.999997	1623	0	0.70462	0.076762	0.077617	0.901014	240	1	0.70462
NonTargeting_Human_0947	1	0.92447	0.92476	0.999997	1624	0	1.2095	0.075531	0.076272	0.901014	238	1	1.2095
KCNK12	15	0.92448	0.96682	0.999997	1625	2	0.0046624	0.39575	0.68384	0.999997	857	4	0.0046624
SDHAF1	15	0.92734	0.96808	0.999997	1626	1	0.48182	0.002742	0.017403	0.516781	51	10	0.48182
NonTargeting_Human_0240	1	0.92791	0.92799	0.999997	1627	0	0.61071	0.072085	0.072723	0.901014	232	1	0.61071
NonTargeting_Human_0572	1	0.92841	0.92845	0.999997	1628	0	0.86784	0.071593	0.072254	0.901014	230	1	0.86784
NonTargeting_Human_0909	1	0.92857	0.92857	0.999997	1629	0	0.98205	0.071429	0.072096	0.901014	229	1	0.98205
NonTargeting_Human_0960	1	0.92882	0.92878	0.999997	1630	0	1.0054	0.071182	0.071825	0.901014	226	1	1.0054
NonTargeting_Human_0251	1	0.92931	0.92939	0.999997	1631	0	0.73362	0.07069	0.071395	0.901014	225	1	0.73362
COMMD10	15	0.92976	0.96901	0.999997	1632	1	0.32936	0.017223	0.081228	0.901014	96	7	0.32936
NonTargeting_Human_0914	1	0.9298	0.9298	0.999997	1633	0	0.90682	0.070198	0.070785	0.901014	224	1	0.90682
C16orf62	15	0.93017	0.96914	0.999997	1634	2	0.73888	2.7329e-05	0.00021757	0.021177	17	12	0.73888
NonTargeting_Human_0160	1	0.93062	0.93058	0.999997	1635	0	0.96336	0.069377	0.069914	0.901014	220	1	0.96336
NonTargeting_Human_0326	1	0.9307	0.93063	0.999997	1636	0	0.74491	0.069295	0.069835	0.901014	219	1	0.74491
NonTargeting_Human_0809	1	0.93251	0.93243	0.999997	1637	0	1.8689	0.06749	0.068016	0.901014	215	1	1.8689
NonTargeting_Human_0514	1	0.93358	0.93345	0.999997	1638	0	0.94424	0.066423	0.067134	0.901014	214	1	0.94424
NonTargeting_Human_0073	1	0.93423	0.93406	0.999997	1639	0	0.91152	0.065767	0.066354	0.901014	211	1	0.91152
NonTargeting_Human_0710	1	0.9346	0.93437	0.999997	1640	0	1.0494	0.065398	0.065964	0.901014	210	1	1.0494
BATF	15	0.93655	0.97162	0.999997	1641	1	0.1364	0.2118	0.48582	0.999997	494	3	0.1364
NonTargeting_Human_0655	1	0.93694	0.93666	0.999997	1642	0	0.8988	0.063059	0.063545	0.890653	208	1	0.8988
CHRND	15	0.93921	0.97272	0.999997	1643	2	0.24436	0.073538	0.24258	0.999997	234	6	0.24436
NonTargeting_Human_0052	1	0.93948	0.93918	0.999997	1644	0	0.86216	0.060515	0.061155	0.871086	204	1	0.86216
NonTargeting_Human_0689	1	0.93961	0.93931	0.999997	1645	0	1.1879	0.060392	0.06107	0.871086	203	1	1.1879
TGIF1	15	0.93961	0.97287	0.999997	1646	2	0.52596	0.00015704	0.0013139	0.095916	24	11	0.52596
NonTargeting_Human_0608	1	0.94047	0.94017	0.999997	1647	0	0.88797	0.059531	0.060138	0.870755	202	1	0.88797
USP9X	15	0.94057	0.97323	0.999997	1648	2	0.25207	0.14554	0.38542	0.999997	375	6	0.25207
EGFR	15	0.94112	0.97346	0.999997	1649	2	0.2689	0.1984	0.46637	0.999997	468	5	0.2689
NonTargeting_Human_0268	1	0.94162	0.94138	0.999997	1650	0	1.5032	0.058382	0.058934	0.867668	199	1	1.5032
EPB41	15	0.94182	0.97375	0.999997	1651	2	0.36067	0.010804	0.056024	0.860995	83	8	0.36067
NonTargeting_Human_0414	1	0.94195	0.94178	0.999997	1652	0	0.85131	0.058054	0.058601	0.867668	198	1	0.85131
NonTargeting_Human_0466	1	0.94203	0.94188	0.999997	1653	0	1.4464	0.057972	0.058527	0.867668	197	1	1.4464
MID1	15	0.9461	0.97542	0.999997	1654	2	0.21019	0.19759	0.4651	0.999997	466	6	0.21019
CENPA	15	0.94646	0.97552	0.999997	1655	2	0.091874	0.93112	0.97048	0.999997	1646	2	0.091874
CMTR1	15	0.94859	0.97658	0.999997	1656	2	-0.048568	0.048878	0.18248	0.999997	186	6	-0.048568
NonTargeting_Human_0661	1	0.9495	0.94919	0.999997	1657	0	0.97312	0.050505	0.051147	0.805384	187	1	0.97312
RNF112	15	0.95091	0.97767	0.999997	1658	2	0.40558	0.0044899	0.026405	0.616832	61	9	0.40558
NonTargeting_Human_0017	1	0.95114	0.95086	0.999997	1659	0	0.84363	0.048864	0.04953	0.790864	185	1	0.84363
PDCD10	15	0.95172	0.97799	0.999997	1660	1	1.4553	6.5724e-11	2.8256e-06	0.000413	4	13	1.4553
NonTargeting_Human_0502	1	0.95417	0.95383	0.999997	1661	0	0.77464	0.045828	0.04627	0.772041	181	1	0.77464
NonTargeting_Human_0273	1	0.95425	0.95389	0.999997	1662	0	1.1145	0.045745	0.046207	0.772041	180	1	1.1145
NonTargeting_Human_0341	1	0.95466	0.95431	0.999997	1663	0	0.71254	0.045335	0.045846	0.772041	179	1	0.71254
CDH1	15	0.95468	0.97942	0.999997	1664	1	0.5201	0.088544	0.27687	0.999997	271	7	0.5201
ANKHD1-EIF4EBP3	15	0.95482	0.97947	0.999997	1665	1	0.38713	0.043318	0.16825	0.999997	173	8	0.38713
NonTargeting_Human_0559	1	0.95516	0.95476	0.999997	1666	0	1.2855	0.044843	0.045377	0.772041	176	1	1.2855
NonTargeting_Human_0009	1	0.95565	0.95524	0.999997	1667	0	0.99121	0.044351	0.044851	0.772041	175	1	0.99121
PFN1	15	0.95577	0.98007	0.999997	1668	2	-0.030045	0.27169	0.56476	0.999997	624	4	-0.030045
GAGE12B	15	0.95603	0.98022	0.999997	1669	1	0.81346	3.6095e-05	0.0003193	0.029442	18	10	0.81346
IGF1R	15	0.9562	0.98028	0.999997	1670	2	0.13798	0.43024	0.71534	0.999997	904	5	0.13798
NonTargeting_Human_0604	1	0.95639	0.95616	0.999997	1671	0	1.0819	0.043612	0.04406	0.772041	174	1	1.0819
NonTargeting_Human_0994	1	0.95729	0.95709	0.999997	1672	0	1.1849	0.042709	0.043116	0.772041	170	1	1.1849
NonTargeting_Human_0803	1	0.95819	0.95794	0.999997	1673	0	1.2193	0.041807	0.042184	0.772041	168	1	1.2193
SLC38A5	15	0.95888	0.98086	0.999997	1674	1	0.41904	0.0069158	0.038002	0.750751	65	9	0.41904
NonTargeting_Human_0663	1	0.95914	0.95887	0.999997	1675	0	1.3656	0.040863	0.041116	0.772041	167	1	1.3656
NonTargeting_Human_0790	1	0.95926	0.95901	0.999997	1676	0	2.0004	0.04074	0.040946	0.772041	166	1	2.0004
NonTargeting_Human_0408	1	0.96221	0.96219	0.999997	1677	0	1.2863	0.037786	0.038137	0.750751	156	1	1.2863
NonTargeting_Human_0929	1	0.96328	0.9632	0.999997	1678	0	1.0013	0.036719	0.036934	0.743769	154	1	1.0013
NonTargeting_Human_0518	1	0.96353	0.96345	0.999997	1679	0	1.0901	0.036473	0.036696	0.743769	152	1	1.0901
NonTargeting_Human_0355	1	0.96385	0.96382	0.999997	1680	0	0.97637	0.036145	0.036256	0.743769	150	1	0.97637
NonTargeting_Human_0422	1	0.96468	0.9646	0.999997	1681	0	1.0719	0.035325	0.035476	0.739922	149	1	1.0719
NonTargeting_Human_0893	1	0.96492	0.96481	0.999997	1682	0	1.3549	0.035078	0.035199	0.739922	147	1	1.3549
SPDYE2	15	0.96713	0.98251	0.999997	1683	1	0.11837	0.14634	0.38674	0.999997	376	5	0.11837
NonTargeting_Human_0731	1	0.9687	0.96862	0.999997	1684	0	1.3495	0.031304	0.031446	0.697393	142	1	1.3495
PIM2	15	0.96929	0.98302	0.999997	1685	1	0.22867	0.084823	0.26849	0.999997	260	7	0.22867
NonTargeting_Human_0754	1	0.9696	0.96948	0.999997	1686	0	1.0895	0.030401	0.030627	0.687928	139	1	1.0895
ARHGEF35	15	0.97225	0.98376	0.999997	1687	1	0.46583	0.017499	0.082183	0.901014	97	8	0.46583
NonTargeting_Human_0474	1	0.97231	0.97216	0.999997	1688	0	1.5645	0.027693	0.027909	0.635014	133	1	1.5645
SPDYE1	15	0.97302	0.98399	0.999997	1689	1	0.493	0.043307	0.16823	0.999997	172	7	0.493
NonTargeting_Human_0532	1	0.97305	0.97281	0.999997	1690	0	1.259	0.026955	0.027106	0.62487	132	1	1.259
NonTargeting_Human_0918	1	0.97387	0.97365	0.999997	1691	0	1.5065	0.026134	0.026383	0.616832	127	1	1.5065
NonTargeting_Human_0908	1	0.97411	0.97391	0.999997	1692	0	1.6107	0.025888	0.026162	0.616832	126	1	1.6107
EML4	15	0.9747	0.98449	0.999997	1693	1	0.26334	0.11518	0.33445	0.999997	329	4	0.26334
NonTargeting_Human_0723	1	0.97493	0.97461	0.999997	1694	0	1.5224	0.025068	0.025241	0.616832	124	1	1.5224
NonTargeting_Human_0702	1	0.97526	0.97497	0.999997	1695	0	1.1746	0.024739	0.024863	0.616832	122	1	1.1746
HIST2H2AA3	15	0.97621	0.98486	0.999997	1696	1	0.31241	0.0861	0.27142	0.999997	266	6	0.31241
NonTargeting_Human_0545	1	0.97641	0.97617	0.999997	1697	0	1.4616	0.023591	0.023834	0.613216	118	1	1.4616
COMMD2	15	0.97807	0.98534	0.999997	1698	1	0.53066	0.00036836	0.0028511	0.172243	29	10	0.53066
NonTargeting_Human_0662	1	0.98027	0.98	0.999997	1699	0	1.2555	0.019734	0.020065	0.54326	105	1	1.2555
WDR13	15	0.98194	0.98673	0.999997	1700	1	0.26575	0.099105	0.30054	0.999997	293	7	0.26575
C6orf62	15	0.98237	0.98689	0.999997	1701	1	0.44662	0.056598	0.20218	0.999997	195	7	0.44662
NonTargeting_Human_0184	1	0.98412	0.98429	0.999997	1702	0	2.0371	0.015878	0.015922	0.491891	94	1	2.0371
EPAS1	15	0.98496	0.98791	0.999997	1703	1	0.056577	0.47369	0.75021	0.999997	989	4	0.056577
EBP	15	0.98503	0.98793	0.999997	1704	1	0.52294	0.0011336	0.0078863	0.348625	39	10	0.52294
NonTargeting_Human_0800	1	0.98511	0.9853	0.999997	1705	0	1.8612	0.014893	0.014826	0.489274	91	1	1.8612
HDAC3	15	0.98546	0.98808	0.999997	1706	1	0.93292	8.2977e-07	8.4769e-06	0.001142	13	11	0.93292
RBM3	15	0.98576	0.98821	0.999997	1707	1	0.61709	0.00014108	0.0012009	0.095635	22	10	0.61709
CCDC115	15	0.98616	0.98843	0.999997	1708	1	0.50603	0.010978	0.056809	0.861087	84	9	0.50603
NonTargeting_Human_0512	1	0.98617	0.98633	0.999997	1709	0	1.5691	0.013826	0.013735	0.469059	89	1	1.5691
CIAPIN1	15	0.98667	0.98865	0.999997	1710	1	0.2441	0.091329	0.28332	0.999997	276	6	0.2441
TREM1	15	0.98859	0.98964	0.999997	1711	1	0.16216	0.030143	0.12579	0.937383	138	6	0.16216
NonTargeting_Human_0979	1	0.98958	0.9898	0.999997	1712	0	3.2503	0.010421	0.010373	0.395071	82	1	3.2503
ZBTB44	15	0.99091	0.99112	0.999997	1713	1	0.21492	0.030694	0.12769	0.937383	141	6	0.21492
NonTargeting_Human_0300	1	0.99093	0.9911	0.999997	1714	0	1.9776	0.009067	0.0088188	0.348625	75	1	1.9776
NonTargeting_Human_0762	1	0.99102	0.99118	0.999997	1715	0	1.7254	0.008985	0.0087623	0.348625	74	1	1.7254
NonTargeting_Human_0852	1	0.99118	0.99136	0.999997	1716	0	3.3199	0.0088209	0.0085871	0.348625	73	1	3.3199
ACTR3	15	0.99152	0.99161	0.999997	1717	1	0.71432	1.9284e-07	2.8256e-06	0.000413	12	10	0.71432
NonTargeting_Human_0114	1	0.99184	0.99198	0.999997	1718	0	2.0857	0.0081644	0.0080333	0.348625	70	1	2.0857
LSS	15	0.99188	0.9919	0.999997	1719	1	0.10689	0.25051	0.54005	0.999997	588	6	0.10689
NCOR1	15	0.99235	0.99233	0.999997	1720	1	0.49653	0.00054221	0.0042723	0.233911	32	11	0.49653
B4GALT2	15	0.99336	0.99331	0.999997	1721	1	0.50755	0.00082844	0.0061514	0.291276	37	10	0.50755
GAGE1	14	0.9941	0.99389	0.999997	1722	0	0.87556	6.1574e-05	0.00044362	0.038861	19	8	0.87556
TFRC	15	0.9942	0.99404	0.999997	1723	0	0.50056	0.0016574	0.011	0.410048	42	10	0.50056
COMMD3	15	0.99467	0.99459	0.999997	1724	0	1.0032	2.3846e-05	0.00020627	0.021177	16	9	1.0032
HIST1H2BF	15	0.99477	0.99468	0.999997	1725	0	0.21428	0.051949	0.19027	0.999997	188	7	0.21428
NRBP1	15	0.99567	0.99557	0.999997	1726	0	0.31777	0.14912	0.39115	0.999997	382	6	0.31777
VPS13C	15	0.99573	0.99561	0.999997	1727	0	0.14802	0.22797	0.5089	0.999997	537	6	0.14802
NAA10	15	0.99677	0.99663	0.999997	1728	0	0.3297	0.020117	0.091853	0.901014	108	7	0.3297
CREB5	15	0.99686	0.99673	0.999997	1729	0	0.15019	0.15395	0.3989	0.999997	388	4	0.15019
CDT1	15	0.99717	0.99706	0.999997	1730	0	0.15037	0.045175	0.17343	0.999997	177	6	0.15037
ARPC4	15	0.99779	0.99758	0.999997	1731	0	1.1437	6.3505e-08	2.8256e-06	0.000413	10	12	1.1437
OLR1	15	0.99783	0.99762	0.999997	1732	0	0.24928	0.26241	0.55557	0.999997	609	5	0.24928
KDM3B	15	0.99797	0.99772	0.999997	1733	0	0.43727	0.014886	0.072672	0.901014	90	8	0.43727
ISG20	15	0.99854	0.99838	0.999997	1734	0	0.33471	0.0025226	0.016092	0.491891	49	10	0.33471
AGPAT6	15	0.99866	0.99849	0.999997	1735	0	0.62378	0.00082613	0.0061288	0.291276	36	10	0.62378
RAB7A	15	0.99878	0.99865	0.999997	1736	0	0.76795	0.00030842	0.0023764	0.150106	27	11	0.76795
CERS6	15	0.99882	0.99867	0.999997	1737	0	0.17865	0.0030083	0.018946	0.54326	53	7	0.17865
SPNS1	15	0.99915	0.99903	0.999997	1738	0	0.43491	0.00045123	0.0035405	0.200096	31	11	0.43491
ATP6AP2	14	0.99932	0.99929	0.999997	1739	0	0.73675	0.00033965	0.002399	0.150106	28	10	0.73675
KDM6A	15	0.99954	0.99955	0.999997	1740	0	0.20356	0.01595	0.07643	0.901014	95	7	0.20356
VPS33A	15	0.9996	0.99964	0.999997	1741	0	0.79205	2.1737e-05	0.00020062	0.021177	15	12	0.79205
ATP6V1H	15	0.99969	0.99974	0.999997	1742	0	0.40765	0.0094236	0.049655	0.790864	79	8	0.40765
NonTargeting_Human_0506	1	0.99988	0.99986	0.999997	1743	0	5.8327	0.00012308	0.00010455	0.012211	21	1	5.8327
CCDC22	15	0.99993	0.99994	0.999997	1744	0	0.86187	1.478e-07	2.8256e-06	0.000413	11	14	0.86187
IRF2BP2	15	0.99994	0.99995	0.999997	1745	0	1.0764	5.0904e-08	2.8256e-06	0.000413	9	12	1.0764
SCARB1	15	0.99995	0.99997	0.999997	1746	0	0.54434	6.3903e-05	0.00055665	0.04644	20	10	0.54434
CDIPT	15	1	1	0.999997	1747	0	1.3448	9.5246e-14	2.8256e-06	0.000413	3	14	1.3448
CHP1	15	1	1	0.999997	1748	0	1.1105	3.8061e-09	2.8256e-06	0.000413	7	12	1.1105
AP2M1	15	1	1	0.999997	1749	0	2.0708	1.268e-16	2.8256e-06	0.000413	2	15	2.0708
CAB39	15	1	1	0.999997	1750	0	1.075	4.3167e-10	2.8256e-06	0.000413	6	15	1.075
STK40	15	1	1	0.999997	1751	0	0.81188	3.5035e-10	2.8256e-06	0.000413	5	15	0.81188
MYLIP	15	1	1	0.999997	1752	0	3.218	2.7904e-33	2.8256e-06	0.000413	1	15	3.218

## Sheet: sLDLR_gRNA
sgrna	Gene	control_count	treatment_count	control_mean	treat_mean	LFC	control_var	adj_var	score	p.low	p.high	p.twosided	FDR	high_in_treatment
LDLR_14	LDLR	267.43/1542.4/1369.5	184.41/85.532/90.393	1369.5	90.393	-3.9065	622000	23650	8.3177	4.46e-17	1	8.91e-17	2.53e-14	FALSE
hsa-mir-6886_6	hsa-mir-6886	262.01/904.44/1043.3	285.52/37.634/14.927	904.44	37.634	-4.5507	216000	15343	6.9978	1.16e-12	1	2.32e-12	5.33e-10	FALSE
LDLR_12	LDLR	87.638/711.23/718.61	80.075/15.966/2.4879	711.23	15.966	-5.3916	194000	11942	6.4357	6.14e-11	1	1.23e-10	2.38e-08	FALSE
LDLR_3	LDLR	111.13/674.58/751.73	88.972/18.247/37.318	674.58	37.318	-4.14	162000	11301	6.0132	9.09e-10	1	1.82e-09	2.88e-07	FALSE
LDLR_9	LDLR	287.31/604.62/547.96	19.412/25.089/38.147	547.96	25.089	-4.3952	35574	9098.6	5.525	1.65e-08	1	3.29e-08	4.23e-06	FALSE
MBTPS1_14	MBTPS1	550.22/786.18/724.37	249.93/86.672/138.49	724.37	138.49	-2.3785	17074	12172	5.3104	5.47e-08	1	1.09e-07	1.26e-05	FALSE
LDLR_1	LDLR	423.73/581.31/403.23	29.927/1.1404/4.9757	423.73	4.9757	-6.1513	12625	6959.1	5.267	6.94e-08	1	1.39e-07	1.55e-05	FALSE
LDLR_4	LDLR	439.09/596.3/574.6	236.99/22.808/64.685	574.6	64.685	-3.1314	9416.1	9560.4	5.2193	8.98e-08	1	1.8e-07	1.94e-05	FALSE
LDLR_11	LDLR	359.59/514.68/562.36	36.398/36.493/26.537	514.68	36.398	-3.7855	13164	8523.2	5.2027	9.82e-08	1	1.96e-07	2.1e-05	FALSE
LDLR_13	LDLR	176.18/441.39/471.63	15.368/10.264/2.4879	441.39	10.264	-5.2956	35626	7261.8	5.2006	9.93e-08	1	1.99e-07	2.11e-05	FALSE
SCAP_1	SCAP	255.69/881.12/513.39	408.46/75.268/67.173	513.39	75.268	-2.7537	101000	8501	4.7545	9.95e-07	1	1.99e-06	0.00017102	FALSE
HNF4A_4	HNF4A	384.88/884.45/807.89	253.97/318.18/213.13	807.89	253.97	-1.6656	92399	13639	4.743	1.05e-06	1	2.11e-06	0.00017976	FALSE
LDLR_5	LDLR	321.64/749.53/465.87	111.62/25.089/54.733	465.87	54.733	-3.0664	50634	7682.2	4.6989	1.31e-06	1	2.62e-06	0.00021278	FALSE
PROX1_10	PROX1	664.97/566.32/792.77	364.78/128.87/173.32	664.97	173.32	-1.9337	13033	11133	4.6595	1.58e-06	1	3.17e-06	0.0002545	FALSE
HNF4A_13	HNF4A	196.06/469.71/680.45	57.427/67.285/89.563	469.71	67.285	-2.7852	59648	7748.2	4.5759	2.37e-06	1	4.74e-06	0.00035721	FALSE
MBTPS1_3	MBTPS1	262.01/684.58/586.84	167.43/140.27/126.05	586.84	140.27	-2.0569	57533	9772.8	4.5174	3.13e-06	1	6.26e-06	0.00045759	FALSE
LDLR_2	LDLR	224.06/539.67/465.15	338.9/74.127/74.636	465.15	74.636	-2.6236	31838	7669.8	4.4619	4.06e-06	1	8.12e-06	0.00057774	FALSE
TAF8_8	TAF8	82.217/431.4/478.11	56.618/58.161/63.855	431.4	58.161	-2.8696	62055	7090.4	4.4396	4.51e-06	1	9.01e-06	0.00063226	FALSE
LDLR_6	LDLR	122.87/471.37/390.99	98.678/25.089/38.977	390.99	38.977	-3.2936	39173	6399.2	4.4219	4.89e-06	1	9.79e-06	0.0006786	FALSE
hsa-mir-6886_9	hsa-mir-6886	280.98/557.99/511.95	147.21/104.92/105.32	511.95	105.32	-2.2704	27733	8476.2	4.4173	5e-06	1	9.99e-06	0.000689	FALSE
SCAP_9	SCAP	136.43/634.61/434.91	80.884/28.511/81.271	434.91	80.884	-2.4124	64485	7150.6	4.1888	1.4e-05	0.99999	2.8e-05	0.0016778	FALSE
SCAP_5	SCAP	60.534/348.12/347.06	96.251/45.617/44.782	347.06	45.617	-2.9004	41050	5651.5	4.0255	2.84e-05	0.99997	5.69e-05	0.003112	FALSE
HNF4A_9	HNF4A	293.63/656.26/626.44	242.65/228.08/99.515	626.44	228.08	-1.4536	55825	10462	3.8947	4.92e-05	0.99995	9.83e-05	0.0050844	FALSE
hsa-mir-6886_2	hsa-mir-6886	284.6/428.07/372.98	276.62/75.268/75.465	372.98	75.465	-2.2901	5423.2	6092.3	3.8149	6.81e-05	0.99993	0.00013623	0.0068705	FALSE
TAF8_1	TAF8	43.367/316.47/262.1	11.324/23.949/21.562	262.1	21.562	-3.5437	25400	4217.1	3.7784	7.89e-05	0.99992	0.00015787	0.0078643	FALSE
SCAP_11	SCAP	182.5/288.15/421.95	89.781/21.668/33.172	288.15	33.172	-3.081	14531	4655.2	3.7719	8.1e-05	0.99992	0.00016203	0.0079625	FALSE
HNF4A_15	HNF4A	148.17/359.78/473.07	74.413/75.268/10.781	359.78	74.413	-2.2582	28806	5867.6	3.7288	9.62e-05	0.9999	0.00019238	0.008894	FALSE
PROX1_12	PROX1	100.29/289.82/301.7	44.486/79.829/21.562	289.82	44.486	-2.6766	18032	4683.2	3.6032	0.00015714	0.99984	0.00031427	0.013272	FALSE
TAF8_7	TAF8	146.36/917.76/507.63	290.37/190.45/127.71	507.63	190.45	-1.4097	149000	8401.6	3.4604	0.00026964	0.99973	0.00053929	0.021029	FALSE
MESDC2_2	MESDC2	210.51/288.15/156.25	31.545/18.247/18.244	210.51	18.247	-3.4581	4486.3	3355.6	3.4208	0.00031215	0.99969	0.0006243	0.023734	FALSE
INTS12_2	INTS12	28.008/329.8/290.18	45.295/101.5/58.88	290.18	58.88	-2.2818	35152	4689.3	3.3863	0.00035417	0.99965	0.00070834	0.026358	FALSE
CEBPA_4	CEBPA	125.58/134.92/148.33	1.6177/46.757/3.3172	134.92	3.3172	-4.9765	133.5	2110.2	3.3326	0.00043016	0.99957	0.00086033	0.030524	FALSE
SCAP_3	SCAP	252.07/403.08/364.34	173.9/99.217/110.3	364.34	110.3	-1.7149	7052.8	5945.3	3.2955	0.00049128	0.99951	0.00098256	0.034069	FALSE
TAF7_3	TAF7	79.507/249.84/302.42	9.706/108.34/43.123	249.84	43.123	-2.5072	15890	4011.8	3.2851	0.00050979	0.99949	0.0010196	0.035062	FALSE
hsa-mir-6886_7	hsa-mir-6886	57.823/273.16/320.42	105.96/55.881/55.563	273.16	55.881	-2.269	24302	4402.9	3.285	0.00050991	0.99949	0.0010198	0.035062	FALSE
SCAP_2	SCAP	148.17/223.19/216.01	93.016/12.545/27.367	216.01	27.367	-2.9355	2327.1	3447.1	3.269	0.00053965	0.99946	0.0010793	0.036591	FALSE
RABIF_12	RABIF	124.68/294.82/345.62	322.73/60.442/69.66	294.82	69.66	-2.0657	15764	4767.5	3.266	0.00054546	0.99945	0.0010909	0.036883	FALSE
MTA2_12	MTA2	298.15/173.23/215.29	55.81/27.37/19.903	215.29	27.37	-2.9306	4317.4	3435.1	3.2623	0.00055252	0.99945	0.001105	0.037154	FALSE
PROX1_1	PROX1	52.402/298.15/240.5	93.825/31.932/40.635	240.5	40.635	-2.5361	19352	3855.4	3.2437	0.00058999	0.99941	0.00118	0.039149	FALSE
SCAP_8	SCAP	259.3/243.18/252.02	43.677/46.757/56.392	252.02	46.757	-2.4054	65.548	4048.2	3.2436	0.0005902	0.99941	0.0011804	0.039149	FALSE
HNF4A_1	HNF4A	66.858/313.14/366.5	207.06/70.706/86.246	313.14	86.246	-1.8482	31751	5076.8	3.1866	0.00071976	0.99928	0.0014395	0.045399	FALSE
SCAP_7	SCAP	60.534/298.15/477.39	182.8/77.549/31.513	298.15	77.549	-1.9292	44294	4823.6	3.1797	0.00073709	0.99926	0.0014742	0.045899	FALSE
MEF2B_2	MEF2B	223.16/176.56/261.38	99.487/22.808/36.489	223.16	36.489	-2.58	1816.2	3566.1	3.1584	0.00079311	0.99921	0.0015862	0.048279	FALSE
PROX1_8	PROX1	179.79/288.15/268.58	97.06/25.089/62.197	268.58	62.197	-2.0928	4132.9	4325.9	3.1456	0.00082882	0.99917	0.0016576	0.050202	FALSE
PROX1_2	PROX1	86.735/214.87/276.5	24.265/34.213/88.734	214.87	34.213	-2.616	10108	3428	3.1231	0.0008948	0.99911	0.0017896	0.053144	FALSE
MBTPS1_9	MBTPS1	15.359/109.93/73.445	0/0/33.172	73.445	0	-6.2181	2352.6	1119.4	3.1205	0.00090281	0.9991	0.0018056	0.053394	FALSE
HNF4A_5	HNF4A	65.954/449.72/357.14	203.02/122.03/72.978	357.14	122.03	-1.5416	46681	5822.8	3.0816	0.0010294	0.99897	0.0020587	0.059402	FALSE
TAF2_7	TAF2	154.5/159.9/195.85	6.4707/13.685/50.587	159.9	13.685	-3.4538	660.89	2519.2	3.0706	0.001068	0.99893	0.002136	0.061003	FALSE
TAF10_2	TAF10	31.622/133.25/133.21	7.2795/5.7021/18.244	133.21	7.2795	-4.0188	5159.9	2082.4	3.051	0.0011405	0.99886	0.0022811	0.063708	FALSE
TAF2_13	TAF2	118.36/201.54/253.46	56.618/26.23/32.342	201.54	32.342	-2.6028	4807.5	3206.7	3.0311	0.0012185	0.99878	0.002437	0.06699	FALSE
GIGYF2_15	GIGYF2	174.37/188.22/96.486	22.647/112.9/21.562	174.37	22.647	-2.8907	3129	2757.3	2.9716	0.0014814	0.99852	0.0029628	0.077103	FALSE
WRB_13	WRB	18.973/176.56/100.81	12.941/3.4213/2.4879	100.81	3.4213	-4.5252	6217.4	1557.3	2.9702	0.0014882	0.99851	0.0029763	0.077217	FALSE
TMEM165_6	TMEM165	27.105/274.83/316.82	117.28/77.549/20.732	274.83	77.549	-1.8121	31565	4430.9	2.9674	0.0015015	0.9985	0.0030031	0.077653	FALSE
PROX1_7	PROX1	123.78/261.5/198.73	59.045/29.651/34.83	198.73	34.83	-2.4788	4779.3	3160.1	2.9534	0.0015713	0.99843	0.0031426	0.079979	FALSE
TAF2_11	TAF2	192.44/329.8/249.14	109.19/60.442/63.026	249.14	63.026	-1.966	4860	3999.9	2.9505	0.0015861	0.99841	0.0031721	0.080412	FALSE
DHRSX_3	DHRSX	57.823/24.984/62.644	0/31.932/0.82929	57.823	0.82929	-5.007	550.81	872.41	2.9222	0.0017379	0.99826	0.0034758	0.085876	FALSE
CEBPA_2	CEBPA	219.55/208.2/306.74	39.633/47.898/160.05	219.55	47.898	-2.1732	3865.7	3505.9	2.9169	0.0017677	0.99823	0.0035355	0.086822	FALSE
TAF8_4	TAF8	83.121/229.86/212.41	74.413/45.617/38.977	212.41	45.617	-2.1947	8510.5	3387.2	2.8865	0.0019479	0.99805	0.0038958	0.093599	FALSE
SUMO2_6	SUMO2	131.01/574.64/461.55	187.65/210.98/231.37	461.55	210.98	-1.1257	61025	7607.9	2.8728	0.0020344	0.99797	0.0040687	0.096612	FALSE
TAF8_3	TAF8	116.55/273.16/326.9	173.9/83.251/32.342	273.16	83.251	-1.7023	13708	4402.9	2.865	0.0020851	0.99791	0.0041702	0.098449	FALSE
TAF7_8	TAF7	43.367/139.91/138.97	33.971/13.685/0	138.97	13.685	-3.2527	4570.3	2176.4	2.8513	0.0021773	0.99782	0.0043547	0.10145	FALSE
hsa-mir-6886_5	hsa-mir-6886	230.39/416.41/426.99	166.62/181.33/184.93	416.41	181.33	-1.1949	17358	6833.7	2.8438	0.0022291	0.99777	0.0044582	0.10325	FALSE
TAF1_12	TAF1	121.07/311.47/226.82	56.618/60.442/7.4636	226.82	56.618	-1.9833	9174.8	3627	2.8375	0.0022738	0.99773	0.0045475	0.10492	FALSE
TAF1_5	TAF1	124.68/264.84/340.58	80.075/87.812/56.392	264.84	80.075	-1.7132	12690	4263.1	2.8332	0.0023043	0.9977	0.0046086	0.10593	FALSE
TMEM134_4	TMEM134	323.45/349.78/185.05	119.71/166.5/99.515	323.45	119.71	-1.4265	9923.4	5251.2	2.8121	0.002461	0.99754	0.004922	0.11043	FALSE
IRS1_10	IRS1	19.877/58.297/48.243	0/0/6.6343	48.243	0	-5.6219	452.87	722.3	2.7999	0.0025556	0.99744	0.0051113	0.11384	FALSE
SUMO2_9	SUMO2	70.472/169.89/187.93	36.398/15.966/29.025	169.89	29.025	-2.5089	5105.1	2683.5	2.7759	0.0027524	0.99725	0.0055048	0.11912	FALSE
CTCF_7	CTCF	0.90349/83.282/45.363	33.162/0/0	45.363	0	-5.5349	1707.2	677.4	2.7581	0.0029072	0.99709	0.0058145	0.12407	FALSE
CEBPA_12	CEBPA	250.27/183.22/264.98	76.031/78.689/19.903	250.27	76.031	-1.7057	2355.8	4018.8	2.7528	0.0029547	0.99705	0.0059094	0.12565	FALSE
MESDC2_3	MESDC2	374.04/423.07/444.99	246.69/193.87/189.08	423.07	193.87	-1.1218	1442.1	6947.7	2.7498	0.0029819	0.99702	0.0059639	0.12637	FALSE
USO1_15	USO1	27.105/88.279/44.643	0/31.932/0	44.643	0	-5.5123	1105.8	666.2	2.7474	0.0030038	0.997	0.0060076	0.12686	FALSE
SPATA5_12	SPATA5	43.367/59.963/23.762	0/3.4213/0	43.367	0	-5.4714	329.9	646.37	2.7282	0.0031843	0.99682	0.0063687	0.13174	FALSE
DYRK1A_13	DYRK1A	79.507/248.18/367.22	26.692/76.408/117.76	248.18	76.408	-1.6866	21311	3983.9	2.7257	0.0032081	0.99679	0.0064163	0.13206	FALSE
LDLR_10	LDLR	240.33/254.84/240.5	116.47/71.847/65.514	240.5	71.847	-1.7291	102.92	3855.4	2.7215	0.003249	0.99675	0.006498	0.13263	FALSE
HNF4A_2	HNF4A	113.84/344.79/315.38	125.37/46.757/121.08	315.38	121.08	-1.3739	20742	5114.7	2.7174	0.0032897	0.99671	0.0065794	0.13406	FALSE
IRS1_6	IRS1	302.67/261.5/121.69	71.986/85.532/154.25	261.5	85.532	-1.601	10622	4207.2	2.7158	0.0033063	0.99669	0.0066125	0.13414	FALSE
MCCC2_14	MCCC2	42.464/54.966/4.3203	0/0/0	42.464	0	-5.4417	805.62	632.34	2.7144	0.00332	0.99668	0.00664	0.13414	FALSE
CEBPA_8	CEBPA	266.53/359.78/146.17	88.972/140.27/44.782	266.53	88.972	-1.5721	11591	4291.5	2.7127	0.0033366	0.99666	0.0066732	0.13414	FALSE
METTL14_14	METTL14	90.349/344.79/318.26	123.75/120.88/153.42	318.26	123.75	-1.3557	26324	5163.4	2.7074	0.003391	0.99661	0.006782	0.13503	FALSE
MBTPS2_9	MBTPS2	65.051/276.5/246.26	42.059/77.549/102	246.26	77.549	-1.6543	16875	3951.7	2.6879	0.0035955	0.9964	0.007191	0.14202	FALSE
TAF2_2	TAF2	45.174/108.27/127.45	8.8972/9.1234/34.83	108.27	9.1234	-3.4321	2174.3	1677.6	2.6821	0.0036583	0.99634	0.0073166	0.14426	FALSE
TAF2_8	TAF2	251.17/276.5/231.86	28.309/143.69/81.271	251.17	81.271	-1.6159	507.21	4034	2.6784	0.0036983	0.9963	0.0073966	0.14514	FALSE
TAF2_15	TAF2	59.63/186.55/162.01	93.016/23.949/29.854	162.01	29.854	-2.4014	5542	2553.8	2.6703	0.0037891	0.99621	0.0075783	0.14746	FALSE
LDLR_7	LDLR	134.62/238.19/155.53	55.001/20.528/27.367	155.53	27.367	-2.4642	3634.6	2447.4	2.6555	0.0039592	0.99604	0.0079184	0.15124	FALSE
HNF4A_10	HNF4A	99.383/188.22/189.37	44.486/50.179/18.244	188.22	44.486	-2.0565	3946.3	2985.9	2.6537	0.0039802	0.99602	0.0079605	0.15134	FALSE
NOMO1_14	NOMO1	255.69/259.84/100.81	241.84/85.532/86.246	255.69	86.246	-1.5568	12002	4109.6	2.6458	0.0040744	0.99593	0.0081487	0.15401	FALSE
WDR18_14	WDR18	302.67/293.15/244.82	124.56/65.004/111.13	293.15	111.13	-1.3915	1213.4	4739.4	2.6449	0.0040855	0.99591	0.0081709	0.15414	FALSE
ATP11A_1	ATP11A	446.32/244.85/300.26	90.59/116.32/145.13	300.26	116.32	-1.3605	12202	4859.3	2.6393	0.0041535	0.99585	0.0083069	0.1555	FALSE
WDR33_1	WDR33	53.306/63.294/26.642	1.6177/0/70.49	53.306	1.6177	-4.3747	405.37	801.48	2.6346	0.0042121	0.99579	0.0084241	0.15673	FALSE
S100A10_14	S100A10	328.87/33.313/203.77	59.045/54.74/29.025	203.77	54.74	-1.8772	22353	3243.7	2.6303	0.0042661	0.99573	0.0085322	0.1585	FALSE
LDLR_15	LDLR	159.01/233.19/221.77	66.325/72.987/9.1222	221.77	66.325	-1.7264	2034.6	3543	2.619	0.0044092	0.99559	0.0088184	0.16016	FALSE
CCT8_14	CCT8	36.139/26.65/51.843	4.0442/0/0	36.139	0	-5.2149	168.33	534.49	2.6127	0.004492	0.99551	0.008984	0.16244	FALSE
INTS12_9	INTS12	50.595/273.16/268.58	112.43/96.936/59.709	268.58	96.936	-1.4608	23769	4325.9	2.6113	0.0045094	0.99549	0.0090189	0.16283	FALSE
CHD7_12	CHD7	175.28/278.16/213.13	85.737/61.583/61.368	213.13	61.583	-1.7747	2830.8	3399.2	2.6089	0.0045418	0.99546	0.0090837	0.16293	FALSE
MBTPS1_1	MBTPS1	13.552/159.9/212.41	31.545/22.808/102	159.9	31.545	-2.3057	12088	2519.2	2.6079	0.0045554	0.99544	0.0091109	0.16293	FALSE
HIST2H2BF_11	HIST2H2BF	196.96/204.87/141.85	52.574/59.302/24.049	196.96	52.574	-1.8856	1549.9	3130.7	2.5958	0.0047183	0.99528	0.0094366	0.16647	FALSE
PAM16_14	PAM16	0/34.978/38.163	0/15.966/0	34.978	0	-5.1691	616.81	516.6	2.5929	0.0047591	0.99524	0.0095182	0.16703	FALSE
MESDC2_13	MESDC2	271.05/336.46/338.42	144.78/52.459/155.91	336.46	144.78	-1.2109	2141.3	5471.6	2.5915	0.0047785	0.99522	0.009557	0.16711	FALSE
TRIAP1_7	TRIAP1	27.105/104.93/108.01	7.2795/10.264/60.538	104.93	10.264	-3.2334	3033.5	1623.8	2.5886	0.0048189	0.99518	0.0096379	0.16756	FALSE
GREB1L_8	GREB1L	378.56/298.15/109.45	399.56/71.847/118.59	298.15	118.59	-1.3228	21037	4823.6	2.586	0.004855	0.99514	0.0097101	0.16834	FALSE
MBTPS2_1	MBTPS2	263.82/241.52/182.89	77.648/80.97/131.86	241.52	80.97	-1.5649	1967.1	3872.5	2.5836	0.0048892	0.99511	0.0097785	0.16865	FALSE
TMEM165_13	TMEM165	118.36/151.57/180.73	48.53/28.511/19.074	151.57	28.511	-2.3702	976.79	2382.5	2.5827	0.0049022	0.9951	0.0098044	0.16865	FALSE
KIAA1432_8	KIAA1432	124.68/309.81/213.13	63.089/33.072/93.71	213.13	63.089	-1.7404	8584.9	3399.2	2.5824	0.0049054	0.99509	0.0098109	0.16865	FALSE
NOP16_10	NOP16	34.332/39.975/0	0.80884/0/19.074	34.332	0.80884	-4.2879	605.28	506.66	2.5817	0.0049162	0.99508	0.0098324	0.16878	FALSE
hsa-mir-6886_12	hsa-mir-6886	38.85/128.25/102.25	9.706/11.404/0	102.25	9.706	-3.2696	2347.8	1580.5	2.5807	0.0049303	0.99507	0.0098607	0.16903	FALSE
KMT2D_2	KMT2D	150.88/54.966/185.05	29.118/27.37/45.611	150.88	29.118	-2.3342	5183.8	2371.2	2.5601	0.0052328	0.99477	0.010466	0.17498	FALSE
STK11_6	STK11	160.82/289.82/288.74	101.91/155.1/114.44	288.74	114.44	-1.3276	8182.2	4665	2.5527	0.0053452	0.99465	0.01069	0.17776	FALSE
PIAS1_4	PIAS1	7.2279/56.632/32.402	0/0/65.514	32.402	0	-5.0619	610.4	477	2.5474	0.005426	0.99457	0.010852	0.17971	FALSE
CEBPA_6	CEBPA	212.32/449.72/241.22	146.4/83.251/55.563	241.22	83.251	-1.5235	22155	3867.4	2.5434	0.0054889	0.99451	0.010978	0.181	FALSE
CTR9_1	CTR9	53.306/98.272/65.524	41.251/2.2808/3.3172	65.524	3.3172	-3.9457	610.86	993.87	2.5424	0.0055045	0.9945	0.011009	0.18109	FALSE
C19orf52_12	C19orf52	8.1314/118.26/149.77	12.133/15.966/87.905	118.26	15.966	-2.8134	6560.6	1839.4	2.5339	0.0056395	0.99436	0.011279	0.18367	FALSE
GPN2_14	GPN2	39.753/31.647/18.001	0.80884/27.37/0	31.647	0.80884	-4.1738	125.96	465.42	2.5337	0.0056434	0.99436	0.011287	0.18367	FALSE
PROX1_14	PROX1	112.94/231.52/305.3	77.648/52.459/81.271	231.52	77.648	-1.5639	9753	3705.5	2.5322	0.0056681	0.99433	0.011336	0.18392	FALSE
TAF8_9	TAF8	9.9383/104.93/126.01	46.912/7.9829/11.61	104.93	11.61	-3.0705	4734.2	1623.8	2.5302	0.0057007	0.9943	0.011401	0.18419	FALSE
PTAR1_1	PTAR1	201.48/241.52/161.29	38.015/99.217/58.88	201.48	58.88	-1.7576	1609.1	3205.6	2.5298	0.0057059	0.99429	0.011412	0.18419	FALSE
CEBPA_14	CEBPA	188.83/203.21/100.09	47.721/51.319/78.783	188.83	51.319	-1.8593	4040.9	2996.1	2.529	0.0057199	0.99428	0.01144	0.18419	FALSE
ELOF1_4	ELOF1	344.23/326.46/343.46	154.49/147.11/271.18	343.46	154.49	-1.1475	144.77	5590.4	2.5276	0.0057425	0.99426	0.011485	0.18419	FALSE
UXT_12	UXT	290.02/143.24/228.26	76.031/66.144/145.13	228.26	76.031	-1.5735	5520.8	3651	2.524	0.0058009	0.9942	0.011602	0.18534	FALSE
TAF8_2	TAF8	200.57/351.45/195.85	67.942/14.825/58.88	200.57	58.88	-1.7512	11393	3190.6	2.5198	0.0058714	0.99413	0.011743	0.1871	FALSE
hsa-mir-6515_13	hsa-mir-6515	178.89/113.26/194.41	46.104/159.66/29.025	178.89	46.104	-1.9332	2273.9	2831.8	2.5176	0.0059078	0.99409	0.011816	0.18777	FALSE
WDR55_3	WDR55	46.078/36.644/66.244	0/17.106/1.6586	46.078	1.6586	-4.1463	247.85	688.53	2.5158	0.005938	0.99406	0.011876	0.18849	FALSE
C19orf52_2	C19orf52	328.87/318.14/204.49	124.56/137.99/243.81	318.14	137.99	-1.1992	6514.9	5161.3	2.5078	0.0060745	0.99393	0.012149	0.19194	FALSE
PFDN6_3	PFDN6	0.90349/34.978/30.242	0/1.1404/0	30.242	0	-4.9654	441.59	443.9	2.5076	0.0060783	0.99392	0.012157	0.19194	FALSE
PPP1CB_4	PPP1CB	37.946/4.9969/30.242	0/2.2808/0.82929	30.242	0.82929	-4.0941	348.34	443.9	2.4985	0.0062363	0.99376	0.012473	0.19615	FALSE
PDRG1_15	PDRG1	401.15/328.13/128.17	156.91/145.97/133.52	328.13	145.97	-1.1631	22658	5330.4	2.4951	0.0062953	0.9937	0.012591	0.19651	FALSE
EIF2S2_8	EIF2S2	48.788/3.3313/29.522	0/4.5617/0	29.522	0	-4.9318	528.57	432.89	2.4939	0.0063179	0.99368	0.012636	0.1969	FALSE
TAF8_6	TAF8	77.7/126.59/164.89	0.80884/109.48/20.732	126.59	20.732	-2.5536	1928.6	1974.6	2.4879	0.0064247	0.99358	0.012849	0.19902	FALSE
TMEM67_12	TMEM67	49.692/61.628/67.684	84.928/2.2808/3.3172	61.628	3.3172	-3.8587	89.581	932.35	2.4866	0.0064483	0.99355	0.012897	0.1995	FALSE
SCAP_15	SCAP	243.04/391.42/421.95	193.31/150.54/255.42	391.42	193.31	-1.014	11475	6406.7	2.4751	0.0066594	0.99334	0.013319	0.20269	FALSE
TMEM30A_7	TMEM30A	0/28.316/50.403	0.80884/15.966/0	28.316	0.80884	-4.0185	644.82	414.47	2.4705	0.0067471	0.99325	0.013494	0.2051	FALSE
RNMT_9	RNMT	1.807/121.59/113.77	0/29.651/16.586	113.77	16.586	-2.7062	6298.2	1766.6	2.4567	0.0070112	0.99299	0.014022	0.21051	FALSE
TAF1_11	TAF1	53.306/89.944/172.09	2.4265/53.6/9.1222	89.944	9.1222	-3.1675	4045.3	1382.8	2.4501	0.0071417	0.99286	0.014283	0.21364	FALSE
MESDC2_1	MESDC2	114.74/336.46/200.89	63.089/67.285/48.099	200.89	63.089	-1.6554	12900	3195.9	2.4469	0.0072037	0.9928	0.014407	0.21435	FALSE
STAG2_11	STAG2	38.85/69.957/67.684	28.309/4.5617/1.6586	67.684	4.5617	-3.6264	418.3	1028	2.4455	0.0072322	0.99277	0.014464	0.2145	FALSE
AQP10_10	AQP10	145.46/111.6/156.25	153.68/23.949/31.513	145.46	31.513	-2.1714	631.58	2282.5	2.4381	0.0073815	0.99262	0.014763	0.21787	FALSE
NCBP1_10	NCBP1	62.34/26.65/12.241	0/18.247/0	26.65	0	-4.7892	740.71	389.09	2.437	0.0074046	0.9926	0.014809	0.21813	FALSE
COPS6_7	COPS6	61.437/24.984/26.642	0/0/0	26.642	0	-4.7888	606.73	388.96	2.4368	0.0074081	0.99259	0.014816	0.21813	FALSE
MED8_2	MED8	251.17/206.54/42.483	167.43/67.285/38.977	206.54	67.285	-1.6037	14453	3289.6	2.4355	0.0074355	0.99256	0.014871	0.21846	FALSE
TAF2_1	TAF2	67.761/73.288/83.526	0/5.7021/6.6343	73.288	5.7021	-3.4704	67.676	1116.9	2.4313	0.0075227	0.99248	0.015045	0.2203	FALSE
C1GALT1_3	C1GALT1	152.69/136.58/108.01	232.14/27.37/19.903	136.58	27.37	-2.2778	537.98	2137.4	2.4311	0.0075268	0.99247	0.015054	0.2203	FALSE
RAB23_1	RAB23	124.68/99.938/112.33	16.986/66.144/14.927	112.33	16.986	-2.6556	153.05	1743.3	2.4248	0.0076585	0.99234	0.015317	0.22282	FALSE
GZF1_1	GZF1	72.279/229.86/160.57	40.442/149.4/31.513	160.57	40.442	-1.963	6298	2530.2	2.4198	0.0077649	0.99224	0.01553	0.22376	FALSE
LDLR_8	LDLR	293.63/288.15/554.44	126.99/51.319/174.98	293.63	126.99	-1.2029	34024	4747.5	2.4191	0.0077804	0.99222	0.015561	0.22376	FALSE
C1GALT1_4	C1GALT1	151.79/176.56/123.85	68.751/19.387/35.66	151.79	35.66	-2.0592	697.06	2386	2.419	0.0077824	0.99222	0.015565	0.22376	FALSE
HYOU1_7	HYOU1	199.67/189.88/228.98	63.898/133.43/52.245	199.67	63.898	-1.6286	477.29	3175.6	2.4184	0.0077949	0.99221	0.01559	0.22385	FALSE
TAF10_6	TAF10	192.44/241.52/277.94	151.25/91.234/60.538	241.52	91.234	-1.3947	1867.4	3872.5	2.4174	0.0078161	0.99218	0.015632	0.22393	FALSE
TAF7_14	TAF7	97.576/114.93/123.85	32.353/18.247/15.757	114.93	18.247	-2.5906	190.33	1785.4	2.4169	0.0078261	0.99217	0.015652	0.22396	FALSE
PROX1_15	PROX1	70.472/39.975/15.121	33.162/0/1.6586	39.975	1.6586	-3.946	773.89	593.75	2.4148	0.007871	0.99213	0.015742	0.2241	FALSE
GTF2H2_1	GTF2H2	125.58/104.93/11.521	14.559/35.353/5.805	104.93	14.559	-2.7674	4576.3	1623.8	2.4141	0.0078862	0.99211	0.015772	0.2241	FALSE
URI1_4	URI1	119.26/43.306/105.85	30.736/9.1234/14.927	105.85	14.927	-2.746	2045.6	1638.5	2.4125	0.007921	0.99208	0.015842	0.22457	FALSE
LACRT_5	LACRT	248.46/133.25/228.98	78.457/83.251/129.37	228.98	83.251	-1.4487	4771.4	3663	2.4113	0.0079487	0.99205	0.015897	0.22483	FALSE
INTS1_5	INTS1	101.19/58.297/94.326	11.324/42.196/5.805	94.326	11.324	-2.9514	672.61	1453.1	2.4041	0.0081066	0.99189	0.016213	0.22782	FALSE
CDC73_8	CDC73	92.155/24.984/19.441	21.03/0/0	24.984	0	-4.6996	2271.3	363.78	2.4022	0.0081494	0.99185	0.016299	0.22782	FALSE
EXOC3_11	EXOC3	16.263/24.984/25.202	0/0/0	24.984	0	-4.6996	38.058	363.78	2.4022	0.0081494	0.99185	0.016299	0.22782	FALSE
C2orf49_15	C2orf49	344.23/281.49/169.21	119.71/127.73/100.34	281.49	119.71	-1.2267	8271.4	4543	2.401	0.0081762	0.99182	0.016352	0.22782	FALSE
POLR3H_2	POLR3H	6.3244/38.31/66.964	1.6177/13.685/0	38.31	1.6177	-3.9085	922.08	567.99	2.3953	0.0083025	0.9917	0.016605	0.22952	FALSE
OTC_15	OTC	180.7/138.25/100.81	25.074/29.651/117.76	138.25	29.651	-2.1836	1601.9	2164.6	2.3944	0.0083243	0.99168	0.016649	0.2296	FALSE
DAP3_7	DAP3	24.394/28.316/13.681	0/1.1404/0	24.394	0	-4.6664	65.076	354.82	2.3894	0.0084374	0.99156	0.016875	0.23115	FALSE
MESDC2_6	MESDC2	109.32/231.52/222.49	84.119/42.196/80.441	222.49	80.441	-1.4564	6444.8	3555	2.3866	0.0085036	0.9915	0.017007	0.23218	FALSE
FNDC3B_3	FNDC3B	125.58/66.625/135.37	92.207/15.966/24.049	125.58	24.049	-2.3372	1786	1958.3	2.3811	0.0086315	0.99137	0.017263	0.23406	FALSE
SETDB1_12	SETDB1	127.39/249.84/193.69	160.96/51.319/62.197	193.69	62.197	-1.6233	3774.5	3076.6	2.3807	0.0086394	0.99136	0.017279	0.23406	FALSE
MBTPS1_6	MBTPS1	105.71/328.13/280.1	179.56/60.442/120.25	280.1	120.25	-1.2131	16360	4519.6	2.3784	0.0086937	0.99131	0.017387	0.23499	FALSE
ELOF1_15	ELOF1	220.45/194.88/119.53	63.089/49.038/121.08	194.88	63.089	-1.6118	3165.8	3096.2	2.378	0.0087025	0.9913	0.017405	0.23499	FALSE
EXOC8_1	EXOC8	283.69/344.79/227.54	122.94/128.87/108.64	283.69	122.94	-1.1997	3443	4580.1	2.3759	0.0087536	0.99125	0.017507	0.23562	FALSE
RPL17_2	RPL17	23.491/4.9969/25.922	0/0/28.196	23.491	0	-4.6142	173.96	341.13	2.3695	0.0089054	0.99109	0.017811	0.23836	FALSE
RPP38_7	RPP38	34.332/23.319/10.801	0/0/39.806	23.319	0	-4.604	139	338.53	2.3657	0.0089983	0.991	0.017997	0.23979	FALSE
ELOF1_1	ELOF1	179.79/186.55/168.49	52.574/54.74/102	179.79	54.74	-1.6976	86.703	2846.8	2.3586	0.0091716	0.99083	0.018343	0.24229	FALSE
CTCF_5	CTCF	55.113/159.9/179.29	17.794/43.336/113.61	159.9	43.336	-1.8596	5678.3	2519.2	2.3498	0.0093906	0.99061	0.018781	0.2449	FALSE
GTF2H3_3	GTF2H3	22.587/34.978/8.6406	31.545/0/0	22.587	0	-4.5599	174.02	327.47	2.3491	0.0094094	0.99059	0.018819	0.24506	FALSE
KIAA1033_2	KIAA1033	83.121/58.297/33.122	0/52.459/4.1465	58.297	4.1465	-3.5263	624.99	879.87	2.3453	0.009506	0.99049	0.019012	0.24685	FALSE
RABIF_13	RABIF	239.42/254.84/307.46	148.83/104.92/50.587	254.84	104.92	-1.2723	1503.2	4095.5	2.344	0.0095387	0.99046	0.019077	0.24739	FALSE
SUMO2_4	SUMO2	73.182/241.52/253.46	132.65/95.795/34.001	241.52	95.795	-1.3251	14240	3872.5	2.3437	0.0095468	0.99045	0.019094	0.24739	FALSE
AGPAT1_1	AGPAT1	146.36/31.647/126.01	24.265/147.11/25.708	126.01	25.708	-2.2496	4659.2	1965.2	2.3411	0.0096146	0.99039	0.019229	0.24861	FALSE
MBTPS2_11	MBTPS2	254.78/266.5/331.22	113.24/133.43/78.783	266.5	113.24	-1.2275	2163	4291	2.3406	0.0096262	0.99037	0.019252	0.24865	FALSE
GET4_14	GET4	162.63/281.49/192.25	25.883/63.864/83.758	192.25	63.864	-1.575	4420.7	3052.7	2.3331	0.0098216	0.99018	0.019643	0.25104	FALSE
CABIN1_1	CABIN1	150.88/71.622/147.61	37.206/6.8425/103.66	147.61	37.206	-1.9596	2892.4	2317.6	2.3323	0.0098419	0.99016	0.019684	0.25104	FALSE
GTF3C4_8	GTF3C4	102.09/69.957/51.843	6.4707/28.511/4.9757	69.957	6.4707	-3.2476	680.44	1064.1	2.3271	0.0099805	0.99002	0.019961	0.25246	FALSE
TAF7_4	TAF7	89.445/33.313/154.81	38.824/0/11.61	89.445	11.61	-2.8425	3711.7	1374.8	2.3244	0.010053	0.98995	0.020106	0.25337	FALSE
USP22_14	USP22	101.19/318.14/308.18	143.97/148.25/72.148	308.18	143.97	-1.0927	21472	4993	2.3241	0.01006	0.98994	0.020119	0.25337	FALSE
GNB2L1_5	GNB2L1	52.402/49.969/46.803	3.2353/20.528/0	49.969	3.2353	-3.5891	7.9715	749.25	2.3164	0.010268	0.98973	0.020537	0.2578	FALSE
GPN3_14	GPN3	217.74/63.294/147.61	38.015/29.651/130.2	147.61	38.015	-1.9294	6013.7	2317.6	2.314	0.010335	0.98966	0.02067	0.25848	FALSE
OSTC_10	OSTC	144.56/199.88/157.69	40.442/101.5/43.952	157.69	43.952	-1.8197	976.04	2482.9	2.3095	0.010459	0.98954	0.020918	0.26087	FALSE
GAPDH_12	GAPDH	156.3/41.641/154.81	7.2795/68.425/42.294	154.81	42.294	-1.8476	6404.8	2435.6	2.3093	0.010463	0.98954	0.020925	0.26087	FALSE
GART_6	GART	217.74/54.966/106.57	1.6177/68.425/18.244	106.57	18.244	-2.4827	7511	1650.2	2.3067	0.010536	0.98946	0.021072	0.26217	FALSE
DYRK1A_3	DYRK1A	188.83/224.86/283.7	70.369/102.64/87.076	224.86	87.076	-1.3586	2380.1	3594.4	2.3013	0.010688	0.98931	0.021376	0.26487	FALSE
PROX1_4	PROX1	32.525/309.81/218.89	173.09/83.251/49.757	218.89	83.251	-1.3841	21499	3495.1	2.2981	0.010778	0.98922	0.021555	0.26601	FALSE
TNFRSF4_10	TNFRSF4	261.11/236.52/139.69	145.59/82.11/95.368	236.52	95.368	-1.3014	4990.4	3789	2.2952	0.010861	0.98914	0.021721	0.26751	FALSE
MORC3_15	MORC3	184.31/164.9/64.804	104.34/49.038/26.537	164.9	49.038	-1.7292	5197.8	2601.3	2.2921	0.010949	0.98905	0.021898	0.26882	FALSE
EIF2B4_5	EIF2B4	34.332/13.325/20.161	0/19.387/0	20.161	0	-4.4034	123.78	290.9	2.2913	0.010974	0.98903	0.021948	0.26895	FALSE
UPP2_10	UPP2	287.31/248.18/115.93	89.781/103.78/192.4	248.18	103.78	-1.2498	9510.8	3983.9	2.2892	0.011033	0.98897	0.022067	0.26986	FALSE
PTAR1_5	PTAR1	152.69/81.616/118.09	23.456/23.949/100.34	118.09	23.949	-2.255	1263.7	1836.6	2.2861	0.011124	0.98888	0.022249	0.27155	FALSE
PTPMT1_14	PTPMT1	135.52/291.49/212.41	80.075/66.144/272.84	212.41	80.075	-1.3963	6082.3	3387.2	2.2782	0.011357	0.98864	0.022714	0.27446	FALSE
HYPK_6	HYPK	122.87/56.632/25.922	42.059/4.5617/0	56.632	4.5617	-3.3733	2665.6	853.68	2.2779	0.011367	0.98863	0.022734	0.27446	FALSE
KLHL20_2	KLHL20	380.37/271.5/126.01	84.119/120.88/155.08	271.5	120.88	-1.1607	16510	4375	2.2777	0.011371	0.98863	0.022742	0.27446	FALSE
USP22_6	USP22	408.38/369.77/393.87	227.28/210.98/104.49	393.87	210.98	-0.89745	395.56	6448.4	2.2775	0.011378	0.98862	0.022755	0.27446	FALSE
TAF10_14	TAF10	269.24/238.19/252.02	111.62/107.2/63.026	252.02	107.2	-1.2255	243.95	4048.2	2.2773	0.011383	0.98862	0.022766	0.27446	FALSE
HYOU1_13	HYOU1	0/19.988/24.482	0/15.966/0.82929	19.988	0.82929	-3.5202	209.85	288.29	2.2772	0.011388	0.98861	0.022776	0.27446	FALSE
SPATA5_14	SPATA5	87.638/26.65/48.243	3.2353/30.791/3.3172	48.243	3.3172	-3.5118	1009.1	722.3	2.2771	0.01139	0.98861	0.02278	0.27446	FALSE
SCAP_12	SCAP	88.542/363.11/197.29	50.148/84.391/70.49	197.29	70.49	-1.4718	19661	3136.2	2.2712	0.011568	0.98843	0.023136	0.27777	FALSE
POLR2C_2	POLR2C	51.499/109.93/66.964	0/54.74/6.6343	66.964	6.6343	-3.1542	1042.7	1016.7	2.2705	0.011588	0.98841	0.023177	0.27777	FALSE
TAF8_12	TAF8	45.174/239.85/300.26	134.27/99.217/58.05	239.85	99.217	-1.265	20774	3844.6	2.2699	0.011607	0.98839	0.023214	0.27777	FALSE
RTBDN_4	RTBDN	70.472/73.288/46.803	0/26.23/7.4636	70.472	7.4636	-3.078	284.07	1072.2	2.2684	0.011654	0.98835	0.023307	0.27792	FALSE
UVRAG_10	UVRAG	192.44/168.23/53.284	52.574/46.757/59.709	168.23	52.574	-1.6594	6899.4	2656.1	2.2613	0.011871	0.98813	0.023742	0.28009	FALSE
DPAGT1_6	DPAGT1	18.973/6.6625/19.441	35.589/0/0	18.973	0	-4.32	75.886	273.05	2.2611	0.011876	0.98812	0.023752	0.28009	FALSE
KLC2_5	KLC2	18.973/23.319/9.3606	0/0/6.6343	18.973	0	-4.32	55.643	273.05	2.2611	0.011876	0.98812	0.023752	0.28009	FALSE
CTDP1_2	CTDP1	166.24/83.282/141.85	33.162/85.532/37.318	141.85	37.318	-1.8984	2012.6	2223.4	2.2565	0.012019	0.98798	0.024037	0.28232	FALSE
EXOC8_7	EXOC8	336.1/224.86/146.89	89.781/107.2/77.124	224.86	89.781	-1.315	9226.4	3594.4	2.2558	0.01204	0.98796	0.02408	0.28232	FALSE
HSD17B10_3	HSD17B10	160.82/53.3/98.647	97.869/11.404/16.586	98.647	16.586	-2.5024	2960.9	1522.5	2.255	0.012065	0.98793	0.024131	0.28264	FALSE
PPIL2_10	PPIL2	37.043/148.24/154.09	41.251/22.808/137.66	148.24	41.251	-1.8206	6199.7	2328	2.2493	0.012247	0.98775	0.024494	0.28498	FALSE
NCBP1_8	NCBP1	61.437/74.953/14.401	1.6177/14.825/5.805	61.437	5.805	-3.1977	1197.5	929.33	2.2463	0.012343	0.98766	0.024687	0.28618	FALSE
NonTargeting_Human_0177	NonTargeting_Human_0177	193.35/184.89/61.204	87.354/62.723/63.855	184.89	63.855	-1.5191	7684.3	2930.9	2.2453	0.012374	0.98763	0.024748	0.2863	FALSE
GPN2_5	GPN2	0.90349/18.322/23.042	0/27.37/0	18.322	0	-4.2722	162.84	263.29	2.244	0.012416	0.98758	0.024832	0.28677	FALSE
GTF3C4_7	GTF3C4	68.665/86.613/152.65	49.339/12.545/0.82929	86.613	12.545	-2.6934	2341.5	1329.4	2.2429	0.012452	0.98755	0.024904	0.28708	FALSE
ZNF232_7	ZNF232	159.01/159.9/89.286	33.162/47.898/163.37	159.01	47.898	-1.7104	2431.4	2504.6	2.2424	0.012466	0.98753	0.024932	0.28708	FALSE
POLR2L_6	POLR2L	72.279/16.656/71.285	8.0884/6.8425/29.025	71.285	8.0884	-2.9916	1492.6	1085.1	2.2419	0.012484	0.98752	0.024969	0.28722	FALSE
SPRN_2	SPRN	462.58/476.37/231.86	330/266.86/229.71	462.58	266.86	-0.79136	26713	7625.7	2.2414	0.012502	0.9875	0.025003	0.28735	FALSE
CABIN1_9	CABIN1	193.35/334.79/210.25	136.69/80.97/65.514	210.25	80.97	-1.3658	7897.8	3351.3	2.2375	0.012628	0.98737	0.025255	0.2885	FALSE
EIF6_10	EIF6	18.07/13.325/32.402	0/0/19.903	18.07	0	-4.2532	113.97	259.51	2.2373	0.012635	0.98737	0.025269	0.2885	FALSE
SETDB1_14	SETDB1	17.166/66.625/18.001	12.941/0/0	18.001	0	-4.248	1182.5	258.49	2.2354	0.012695	0.98731	0.02539	0.2885	FALSE
PHF3_8	PHF3	21.684/0/18.001	0/0/0	18.001	0	-4.248	168.8	258.49	2.2354	0.012695	0.98731	0.02539	0.2885	FALSE
WRB_5	WRB	182.5/174.89/98.647	38.015/90.093/58.05	174.89	58.05	-1.5747	2935.6	2765.9	2.2347	0.012717	0.98728	0.025434	0.2885	FALSE
hsa-mir-6859-1_9	hsa-mir-6859-1	18.07/18.322/20.881	0/23.949/0.82929	18.322	0.82929	-3.4009	3.3071	263.29	2.2341	0.012739	0.98726	0.025477	0.28872	FALSE
SPATA25_10	SPATA25	430.06/298.15/208.09	143.16/288.53/131.03	298.15	143.16	-1.0532	12755	4823.6	2.2318	0.012815	0.98719	0.025629	0.28937	FALSE
HSPA8_5	HSPA8	7.2279/44.972/79.205	3.2353/18.247/0	44.972	3.2353	-3.4402	1298.3	671.32	2.2313	0.01283	0.98717	0.025659	0.28943	FALSE
SNAPC3_15	SNAPC3	244.84/166.56/229.7	82.501/94.655/219.76	229.7	94.655	-1.2701	2107.6	3675	2.2298	0.01288	0.98712	0.02576	0.2903	FALSE
NDUFV1_4	NDUFV1	248.46/111.6/315.38	149.63/75.268/107.81	248.46	107.81	-1.197	11605	3988.6	2.2283	0.01293	0.98707	0.025861	0.29117	FALSE
IRS1_13	IRS1	85.831/143.24/130.33	32.353/20.528/40.635	130.33	32.353	-1.9773	1073.4	2035.5	2.2252	0.013033	0.98697	0.026067	0.29231	FALSE
ATXN7L3_5	ATXN7L3	264.72/286.49/180.01	148.02/119.74/54.733	264.72	119.74	-1.138	3824.7	4261.2	2.2217	0.013153	0.98685	0.026306	0.29379	FALSE
MTA2_13	MTA2	207.8/108.27/182.89	60.663/63.864/155.91	182.89	63.864	-1.5034	3094.8	2897.9	2.2209	0.013179	0.98682	0.026358	0.29379	FALSE
TMEM30A_10	TMEM30A	177.08/93.275/172.09	140.74/57.021/32.342	172.09	57.021	-1.5769	3118.4	2719.7	2.2203	0.013198	0.9868	0.026396	0.29394	FALSE
NSFL1C_15	NSFL1C	186.12/129.92/34.562	32.353/44.476/9.1222	129.92	32.353	-1.9728	6125.6	2028.8	2.2198	0.013217	0.98678	0.026434	0.294	FALSE
DOCK5_10	DOCK5	216.84/228.19/128.89	82.501/86.672/185.76	216.84	86.672	-1.3131	3931.9	3460.8	2.2159	0.01335	0.98665	0.0267	0.29486	FALSE
PPIL2_6	PPIL2	0/49.969/17.281	7.2795/0/0	17.281	0	-4.1923	683.57	247.72	2.2157	0.013356	0.98664	0.026711	0.29486	FALSE
CCT6A_3	CCT6A	6.3244/19.988/17.281	0/36.493/0	17.281	0	-4.1923	63.688	247.72	2.2157	0.013356	0.98664	0.026711	0.29486	FALSE
TAF2_4	TAF2	127.39/144.91/146.89	11.324/41.055/56.392	144.91	41.055	-1.7947	155.41	2273.4	2.2107	0.013528	0.98647	0.027056	0.29661	FALSE
CHD7_15	CHD7	100.29/334.79/241.22	104.34/198.43/97.027	241.22	104.34	-1.2012	14309	3867.4	2.2024	0.013817	0.98618	0.027634	0.30098	FALSE
SRP9_11	SRP9	98.48/316.47/174.25	84.928/59.302/56.392	174.25	59.302	-1.5392	12984	2755.3	2.2023	0.013822	0.98618	0.027644	0.30098	FALSE
SUMO2_10	SUMO2	50.595/149.91/194.41	44.486/54.74/34.001	149.91	44.486	-1.7302	5921.8	2355.2	2.1993	0.013928	0.98607	0.027856	0.30274	FALSE
LIMS3_1	LIMS3	304.47/239.85/126.01	98.678/202.99/103.66	239.85	103.66	-1.2024	8568.2	3844.6	2.1979	0.013976	0.98602	0.027953	0.30326	FALSE
ATP13A1_6	ATP13A1	260.2/318.14/146.89	118.09/115.18/176.64	260.2	118.09	-1.1331	8098.1	4185.4	2.1975	0.013993	0.98601	0.027986	0.30326	FALSE
TAF2_14	TAF2	55.113/93.275/80.645	7.2795/23.949/11.61	80.645	11.61	-2.6948	405.72	1234.1	2.1972	0.014001	0.986	0.028003	0.30326	FALSE
HMOX2_10	HMOX2	149.08/173.23/159.13	50.148/106.06/32.342	159.13	50.148	-1.6465	149.89	2506.5	2.1968	0.014017	0.98598	0.028034	0.30333	FALSE
GTF2A2_10	GTF2A2	0/68.291/68.405	8.0884/34.213/3.3172	68.291	8.0884	-2.9306	2331.8	1037.7	2.1958	0.014054	0.98595	0.028107	0.3038	FALSE
ALG2_15	ALG2	67.761/171.56/56.884	2.4265/7.9829/22.391	67.761	7.9829	-2.9363	5446.3	1029.3	2.194	0.014117	0.98588	0.028235	0.3038	FALSE
FDX1L_11	FDX1L	201.48/133.25/263.54	42.059/77.549/189.91	201.48	77.549	-1.3661	4253.2	3205.6	2.1939	0.01412	0.98588	0.02824	0.3038	FALSE
CTDP1_3	CTDP1	167.14/138.25/92.886	21.839/107.2/38.147	138.25	38.147	-1.8307	1446.4	2164.6	2.1902	0.014256	0.98574	0.028513	0.30473	FALSE
POLR3C_13	POLR3C	0/61.628/105.13	29.118/3.4213/6.6343	61.628	6.6343	-3.0362	2845.1	932.35	2.1867	0.014382	0.98562	0.028764	0.30639	FALSE
CAND1_8	CAND1	201.48/203.21/167.05	248.31/77.549/77.953	201.48	77.953	-1.3587	594.08	3205.6	2.1867	0.014382	0.98562	0.028764	0.30639	FALSE
RCC1_6	RCC1	66.858/59.963/108.73	4.853/7.9829/29.854	66.858	7.9829	-2.9173	900.29	1015	2.1798	0.014636	0.98536	0.029272	0.30905	FALSE
GZF1_4	GZF1	242.13/163.23/210.25	184.41/70.706/84.588	210.25	84.588	-1.3035	1613.7	3351.3	2.1744	0.014836	0.98516	0.029673	0.3122	FALSE
PDRG1_8	PDRG1	46.981/108.27/146.89	48.53/22.808/23.22	108.27	23.22	-2.1736	2623.8	1677.6	2.1731	0.014885	0.98511	0.02977	0.31296	FALSE
CERS2_2	CERS2	32.525/104.93/111.61	21.839/31.932/13.269	104.93	21.839	-2.2136	2643.8	1623.8	2.1685	0.015062	0.98494	0.030123	0.31531	FALSE
EPHA2_2	EPHA2	269.24/304.81/128.17	97.869/126.59/164.2	269.24	126.59	-1.0828	10583	4337	2.1667	0.01513	0.98487	0.030259	0.31619	FALSE
TAF8_13	TAF8	85.831/239.85/246.26	119.71/106.06/61.368	239.85	106.06	-1.1697	11882	3844.6	2.1592	0.015419	0.98458	0.030838	0.3206	FALSE
NCBP2_9	NCBP2	37.946/34.978/25.922	2.4265/19.387/2.4879	34.978	2.4879	-3.3667	45.416	516.6	2.1575	0.015482	0.98452	0.030964	0.32109	FALSE
LSM2_2	LSM2	37.946/26.65/12.241	12.133/0/1.6586	26.65	1.6586	-3.3786	167.62	389.09	2.1539	0.015624	0.98438	0.031248	0.32321	FALSE
KBTBD12_12	KBTBD12	227.68/228.19/75.605	198.16/98.076/65.514	227.68	98.076	-1.2067	11563	3641.4	2.1497	0.015789	0.98421	0.031577	0.32395	FALSE
NonTargeting_Human_0704	NonTargeting_Human_0704	376.75/309.81/182.89	87.354/166.5/157.57	309.81	157.57	-0.97095	10295	5020.5	2.1488	0.015826	0.98417	0.031651	0.32395	FALSE
USP39_13	USP39	16.263/14.991/1.4401	0/0/4.1465	14.991	0	-3.9992	92.618	213.6	2.1486	0.015832	0.98417	0.031665	0.32395	FALSE
HSPE1_6	HSPE1	0/14.991/21.601	0/0/0	14.991	0	-3.9992	134.21	213.6	2.1486	0.015832	0.98417	0.031665	0.32395	FALSE
HSPE1_13	HSPE1	15.359/14.991/5.0403	0/6.8425/0	14.991	0	-3.9992	49.573	213.6	2.1486	0.015832	0.98417	0.031665	0.32395	FALSE
NCBP2_10	NCBP2	44.271/14.991/10.081	0/3.4213/0	14.991	0	-3.9992	440.72	213.6	2.1486	0.015832	0.98417	0.031665	0.32395	FALSE
CAPN15_10	CAPN15	262.01/114.93/89.286	25.074/27.37/54.733	114.93	27.37	-2.0308	11145	1785.4	2.1467	0.01591	0.98409	0.031821	0.32527	FALSE
CERS2_3	CERS2	130.1/133.25/188.65	37.206/112.9/14.927	133.25	37.206	-1.813	1539.6	2083.1	2.1457	0.015949	0.98405	0.031898	0.32552	FALSE
TM9SF2_10	TM9SF2	1.807/108.27/108.01	38.015/14.825/24.049	108.01	24.049	-2.1216	5639.3	1673.4	2.1446	0.015991	0.98401	0.031981	0.32609	FALSE
DCPS_12	DCPS	189.73/218.2/232.58	139.12/86.672/92.051	218.2	92.051	-1.2361	508.51	3483.5	2.14	0.016178	0.98382	0.032357	0.32882	FALSE
LAS1L_9	LAS1L	134.62/36.644/71.285	0.80884/58.161/9.9515	71.285	9.9515	-2.7226	2605.6	1085.1	2.1364	0.016325	0.98368	0.03265	0.32967	FALSE
SRP14_4	SRP14	54.209/13.325/78.485	0/5.7021/55.563	54.209	5.7021	-3.0422	1130.4	815.65	2.136	0.016342	0.98366	0.032683	0.32967	FALSE
ANAPC16_13	ANAPC16	368.62/434.73/215.29	203.02/269.14/185.76	368.62	203.02	-0.85736	13940	6018.1	2.1348	0.01639	0.98361	0.032781	0.33011	FALSE
COPS3_8	COPS3	179.79/221.53/218.17	79.266/92.374/192.4	218.17	92.374	-1.231	742.17	3483.1	2.1342	0.016413	0.98359	0.032827	0.3303	FALSE
UBA3_10	UBA3	14.456/18.322/2.8802	0.80884/80.97/0	14.456	0.80884	-3.095	74.471	205.66	2.1318	0.01651	0.98349	0.033021	0.3309	FALSE
TOMM22_5	TOMM22	24.394/126.59/64.084	8.0884/18.247/5.805	64.084	8.0884	-2.8402	2741	971.11	2.1288	0.016637	0.98336	0.033274	0.33233	FALSE
EEFSEC_11	EEFSEC	425.54/259.84/342.02	189.27/183.61/181.61	342.02	183.61	-0.89384	6864.8	5566	2.1234	0.016859	0.98314	0.033719	0.33402	FALSE
NonTargeting_Human_0792	NonTargeting_Human_0792	442.71/109.93/251.3	116.47/165.36/94.539	251.3	116.47	-1.1028	28311	4036.1	2.1231	0.016873	0.98313	0.033745	0.33402	FALSE
WRB_15	WRB	0.90349/89.944/87.846	21.839/15.966/12.439	87.846	15.966	-2.3887	3781.7	1349.1	2.1217	0.016932	0.98307	0.033864	0.33412	FALSE
EIF2B4_3	EIF2B4	142.75/168.23/136.81	0/156.24/43.952	142.75	43.952	-1.6771	342.22	2238.1	2.117	0.01713	0.98287	0.034259	0.33721	FALSE
C21orf59_9	C21orf59	70.472/136.58/84.246	21.03/14.825/2.4879	84.246	14.825	-2.4294	1464.4	1291.6	2.1123	0.017332	0.98267	0.034664	0.33982	FALSE
NonTargeting_Human_0219	NonTargeting_Human_0219	247.55/229.86/123.13	112.43/65.004/102	229.86	102	-1.1643	5852.2	3677.7	2.11	0.01743	0.98257	0.03486	0.34116	FALSE
NonTargeting_Human_0944	NonTargeting_Human_0944	334.29/198.21/322.58	165.81/169.92/265.37	322.58	169.92	-0.92078	7802.6	5236.5	2.1097	0.017442	0.98256	0.034884	0.34116	FALSE
TMOD2_9	TMOD2	18.973/0/13.681	0/0/19.903	13.681	0	-3.8759	107.59	194.18	2.1066	0.017574	0.98243	0.035149	0.34264	FALSE
TAF10_1	TAF10	107.51/116.59/141.85	29.927/23.949/54.733	116.59	29.927	-1.9269	360.13	1812.4	2.1002	0.017857	0.98214	0.035714	0.34675	FALSE
ATP13A1_5	ATP13A1	321.64/144.91/208.81	189.27/71.847/87.905	208.81	87.905	-1.2388	8406.8	3327.4	2.0993	0.017893	0.98211	0.035787	0.34692	FALSE
LIMS3_6	LIMS3	228.58/138.25/48.243	38.015/42.196/45.611	138.25	42.196	-1.6887	8130.5	2164.6	2.0963	0.018029	0.98197	0.036058	0.34872	FALSE
GTPBP5_1	GTPBP5	119.26/169.89/81.365	90.59/27.37/31.513	119.26	31.513	-1.8871	1999.9	1855.6	2.0956	0.01806	0.98194	0.036121	0.34905	FALSE
GCFC2_8	GCFC2	256.59/263.17/150.49	122.13/156.24/111.13	256.59	122.13	-1.0648	5650.2	4124.8	2.0942	0.018119	0.98188	0.036239	0.34964	FALSE
RNMT_10	RNMT	150.88/8.3282/106.57	16.177/25.089/55.563	106.57	25.089	-2.0437	5807.3	1650.2	2.0932	0.018168	0.98183	0.036335	0.35002	FALSE
GTF2A2_13	GTF2A2	6.3244/29.981/49.683	37.206/2.2808/0.82929	29.981	2.2808	-3.2393	473.91	439.92	2.0911	0.018258	0.98174	0.036517	0.35149	FALSE
GMPPB_15	GMPPB	197.86/103.27/231.14	80.884/215.54/68.831	197.86	80.884	-1.2801	5027.5	3145.7	2.0903	0.018297	0.9817	0.036594	0.35167	FALSE
NOTCH2NL_9	NOTCH2NL	249.36/293.15/236.9	117.28/119.74/106.98	249.36	117.28	-1.0818	1036.5	4003.7	2.0883	0.018386	0.98161	0.036771	0.35255	FALSE
HNF4A_11	HNF4A	139.14/234.85/172.09	44.486/63.864/69.66	172.09	63.864	-1.4161	2512.6	2719.7	2.0856	0.018506	0.98149	0.037011	0.35335	FALSE
TMEM258_15	TMEM258	718.27/538/455.79	334.86/340.99/409.67	538	340.99	-0.65635	19628	8926.3	2.0853	0.018523	0.98148	0.037045	0.35335	FALSE
MLLT11_7	MLLT11	167.14/268.17/204.49	85.737/198.43/82.1	204.49	85.737	-1.2444	2724.6	3255.7	2.085	0.018536	0.98146	0.037072	0.35335	FALSE
NonTargeting_Human_0603	NonTargeting_Human_0603	266.53/344.79/211.69	125.37/130.01/312.64	266.53	130.01	-1.03	4565.5	4291.5	2.0845	0.018558	0.98144	0.037116	0.35335	FALSE
DYRK1A_10	DYRK1A	142.75/329.8/316.82	167.43/112.9/192.4	316.82	167.43	-0.91607	15234	5139	2.0841	0.018578	0.98142	0.037155	0.35344	FALSE
POLR1B_10	POLR1B	149.08/78.285/100.81	22.647/135.71/1.6586	100.81	22.647	-2.1061	1418.5	1557.3	2.0836	0.0186	0.9814	0.0372	0.35344	FALSE
GPN3_5	GPN3	205.09/133.25/107.29	143.97/39.915/38.147	133.25	39.915	-1.7142	2917.6	2083.1	2.0812	0.018707	0.98129	0.037414	0.35488	FALSE
SAFB_3	SAFB	187.92/194.88/77.045	85.737/72.987/74.636	187.92	74.636	-1.3207	6171.3	2981.1	2.0811	0.018714	0.98129	0.037429	0.35488	FALSE
MESDC2_8	MESDC2	269.24/274.83/264.26	99.487/132.29/140.15	269.24	132.29	-1.0197	28.034	4337	2.08	0.018763	0.98124	0.037526	0.35504	FALSE
CCDC169-SOHLH2_15	CCDC169-SOHLH2	300.86/224.86/169.21	75.222/100.36/194.05	224.86	100.36	-1.156	4436.4	3594.4	2.0785	0.01883	0.98117	0.037659	0.35575	FALSE
MBTPS2_13	MBTPS2	312.61/223.19/214.57	359.12/99.217/56.392	223.19	99.217	-1.1616	4034.3	3566.7	2.0779	0.018859	0.98114	0.037717	0.35575	FALSE
ABCG5_13	ABCG5	375.85/376.43/201.61	351.03/208.7/213.13	375.85	213.13	-0.81552	15179	6141.1	2.0765	0.018925	0.98107	0.037851	0.35618	FALSE
PPIL2_9	PPIL2	155.4/213.2/222.49	158.53/92.374/40.635	213.2	92.374	-1.1979	1713.7	3400.3	2.0748	0.019004	0.981	0.038008	0.35711	FALSE
OR5AR1_10	OR5AR1	83.121/6.6625/50.403	5.6618/26.23/3.3172	50.403	5.6618	-2.9479	1491.8	756.04	2.0729	0.019093	0.98091	0.038185	0.35807	FALSE
SOCS1_2	SOCS1	244.84/191.55/94.326	77.648/69.566/144.3	191.55	77.648	-1.2917	6146.3	3041.1	2.0708	0.019189	0.98081	0.038379	0.3589	FALSE
TAF7_2	TAF7	45.174/109.93/69.845	0/23.949/10.781	69.845	10.781	-2.5882	1107.8	1062.3	2.0699	0.019229	0.98077	0.038459	0.3589	FALSE
SRP9_1	SRP9	121.07/188.22/199.45	22.647/119.74/75.465	188.22	75.465	-1.3072	2317.7	2985.9	2.0693	0.019258	0.98074	0.038515	0.35901	FALSE
DYRK1A_14	DYRK1A	159.92/283.16/250.58	139.12/96.936/119.42	250.58	119.42	-1.0629	4640.4	4024	2.0684	0.019301	0.9807	0.038601	0.35913	FALSE
EXT1_15	EXT1	244.84/251.51/227.54	214.34/85.532/115.27	244.84	115.27	-1.0802	172.03	3928.1	2.0684	0.019303	0.9807	0.038605	0.35913	FALSE
HYPK_15	HYPK	85.831/11.659/28.802	16.986/2.2808/1.6586	28.802	2.2808	-3.1833	1773.1	421.89	2.065	0.019461	0.98054	0.038923	0.36121	FALSE
MBTPS1_4	MBTPS1	204.19/233.19/252.74	49.339/107.2/194.05	233.19	107.2	-1.114	611.59	3733.3	2.0634	0.019539	0.98046	0.039077	0.36159	FALSE
ATXN7L3_3	ATXN7L3	137.33/228.19/239.06	20.221/103.78/203.18	228.19	103.78	-1.1292	4187	3650	2.0609	0.019654	0.98035	0.039309	0.36281	FALSE
PSMD5_10	PSMD5	185.21/68.291/150.49	42.868/102.64/51.416	150.49	51.416	-1.5311	3981.2	2364.8	2.057	0.019842	0.98016	0.039685	0.3642	FALSE
TM9SF2_14	TM9SF2	105.71/244.85/204.49	87.354/74.127/197.37	204.49	87.354	-1.2177	5693.6	3255.7	2.0564	0.019872	0.98013	0.039743	0.3642	FALSE
INTS6_15	INTS6	0/28.316/53.284	0/2.2808/10.781	28.316	2.2808	-3.1595	712.59	414.47	2.054	0.019987	0.98001	0.039974	0.36573	FALSE
DROSHA_11	DROSHA	94.866/63.294/21.601	61.472/9.1234/4.1465	63.294	9.1234	-2.667	1367.5	958.63	2.0529	0.02004	0.97996	0.04008	0.36643	FALSE
INO80D_15	INO80D	482.46/224.86/167.77	101.91/319.32/64.685	224.86	101.91	-1.134	34809	3594.4	2.0525	0.020061	0.97994	0.040123	0.36654	FALSE
USP50_4	USP50	318.03/81.616/162.01	59.045/50.179/233.03	162.01	59.045	-1.4409	15402	2553.8	2.0509	0.020141	0.97986	0.040281	0.36771	FALSE
CDK12_2	CDK12	172.57/56.632/118.81	25.883/33.072/70.49	118.81	33.072	-1.8141	3377.9	1848.2	2.0484	0.020261	0.97974	0.040522	0.36936	FALSE
C21orf59_5	C21orf59	118.36/169.89/98.647	0/33.072/72.148	118.36	33.072	-1.8086	1522.3	1840.9	2.0419	0.020579	0.97942	0.041158	0.37293	FALSE
RABIF_3	RABIF	212.32/133.25/163.45	50.957/60.442/145.13	163.45	60.442	-1.4204	1650.1	2577.5	2.0415	0.020602	0.9794	0.041205	0.37308	FALSE
TAF2_10	TAF2	81.314/169.89/234.74	64.707/58.161/102	169.89	64.707	-1.379	6025.5	2683.5	2.0407	0.020642	0.97936	0.041284	0.37351	FALSE
WDR82_11	WDR82	11.745/56.632/0	0/0/0	11.745	0	-3.6719	1076.4	165.64	2.0384	0.020755	0.97924	0.041511	0.37473	FALSE
KAT8_1	KAT8	37.043/11.659/7.2005	0/0/4.1465	11.659	0	-3.6621	332.1	164.38	2.0352	0.020917	0.97908	0.041835	0.37654	FALSE
LSM2_4	LSM2	0/11.659/21.601	0/9.1234/0	11.659	0	-3.6621	117.39	164.38	2.0352	0.020917	0.97908	0.041835	0.37654	FALSE
CABIN1_8	CABIN1	169.86/171.56/122.41	38.015/65.004/96.198	169.86	65.004	-1.3721	1127.1	2682.9	2.0343	0.020961	0.97904	0.041922	0.37705	FALSE
FUNDC2_13	FUNDC2	95.769/74.953/51.843	2.4265/36.493/13.269	74.953	13.269	-2.4123	483.69	1143.4	2.0332	0.021015	0.97899	0.042029	0.37754	FALSE
AMTN_1	AMTN	213.22/204.87/118.81	234.56/88.953/58.88	204.87	88.953	-1.1945	3738.4	3262	2.0329	0.021033	0.97897	0.042066	0.37754	FALSE
GREB1L_6	GREB1L	9.0349/44.972/44.643	3.2353/38.774/4.9757	44.643	4.9757	-2.9332	634.02	666.2	2.0295	0.021204	0.9788	0.042408	0.37975	FALSE
ZBTB8OS_10	ZBTB8OS	55.113/181.55/138.97	29.118/94.655/45.611	138.97	45.611	-1.5864	4422.7	2176.4	2.0282	0.021271	0.97873	0.042541	0.38066	FALSE
WDR37_5	WDR37	240.33/148.24/81.365	116.47/35.353/51.416	148.24	51.416	-1.5096	6476.1	2328	2.0267	0.021347	0.97865	0.042695	0.38147	FALSE
TMEM165_5	TMEM165	164.43/151.57/147.61	115.66/53.6/38.977	151.57	53.6	-1.4825	90.564	2382.5	2.025	0.021435	0.97856	0.04287	0.38276	FALSE
MSI2_12	MSI2	434.58/423.07/270.74	194.12/254.31/491.77	423.07	254.31	-0.73203	11669	6947.7	2.0246	0.021454	0.97855	0.042908	0.38281	FALSE
EWSR1_11	EWSR1	382.17/229.86/105.85	163.38/107.2/84.588	229.86	107.2	-1.0933	19290	3677.7	2.024	0.021485	0.97852	0.04297	0.38309	FALSE
MRP63_14	MRP63	87.638/171.56/100.09	24.265/148.25/24.049	100.09	24.265	-2.0004	2631.7	1545.7	2.0226	0.021559	0.97844	0.043117	0.38356	FALSE
S100A14_11	S100A14	163.53/194.88/109.45	61.472/61.583/39.806	163.53	61.472	-1.3971	1953.9	2578.8	2.0217	0.021602	0.9784	0.043205	0.38364	FALSE
HAVCR1_12	HAVCR1	234/121.59/179.29	71.986/220.1/58.05	179.29	71.986	-1.3046	3161.3	2838.5	2.0213	0.021626	0.97837	0.043252	0.38364	FALSE
WDR18_8	WDR18	290.92/296.48/338.42	90.59/247.47/156.74	296.48	156.74	-0.91529	894.93	4795.5	2.0182	0.021786	0.97821	0.043572	0.38508	FALSE
TRIAP1_2	TRIAP1	137.33/71.622/69.125	23.456/4.5617/12.439	71.622	12.439	-2.4339	2161.9	1090.5	2.0173	0.021833	0.97817	0.043667	0.38551	FALSE
ALG8_3	ALG8	207.8/221.53/115.21	126.99/53.6/92.051	207.8	92.051	-1.166	4381	3310.6	2.0146	0.021975	0.97802	0.043951	0.38551	FALSE
USP22_2	USP22	491.5/393.09/437.79	283.9/266.86/253.76	437.79	266.86	-0.71206	2441.2	7199.9	2.0144	0.021981	0.97802	0.043963	0.38551	FALSE
TMEM165_12	TMEM165	290.92/296.48/288.02	241.84/152.82/128.54	290.92	152.82	-0.92437	19.673	4701.8	2.0143	0.021989	0.97801	0.043978	0.38551	FALSE
DNAJC13_2	DNAJC13	187.92/166.56/144.01	115.66/63.864/54.733	166.56	63.864	-1.3692	482.5	2628.7	2.0138	0.022017	0.97798	0.044035	0.38551	FALSE
WRB_14	WRB	142.75/81.616/140.41	189.27/19.387/47.27	140.41	47.27	-1.5507	1731.1	2199.9	2.0107	0.02218	0.97782	0.04436	0.38728	FALSE
TSPAN11_2	TSPAN11	258.4/448.06/392.43	192.5/379.76/231.37	392.43	231.37	-0.75966	10529	6423.8	2.0094	0.022245	0.97776	0.04449	0.38786	FALSE
METAP1D_14	METAP1D	76.796/204.87/145.45	17.794/52.459/50.587	145.45	50.587	-1.5053	4122.2	2282.3	2.0066	0.022395	0.97761	0.044789	0.38836	FALSE
DPAGT1_5	DPAGT1	0/51.635/34.562	0/3.4213/5.805	34.562	3.4213	-3.0078	743.01	510.2	2.0062	0.022419	0.97758	0.044837	0.38836	FALSE
RALGAPA1_6	RALGAPA1	151.79/83.282/88.566	19.412/82.11/9.9515	88.566	19.412	-2.1335	2012.3	1360.7	2.0061	0.022423	0.97758	0.044845	0.38836	FALSE
HNF4A_14	HNF4A	206.9/329.8/180.01	47.721/101.5/92.051	206.9	92.051	-1.1598	7913.3	3295.6	2.0034	0.022566	0.97743	0.045133	0.39012	FALSE
RANBP1_9	RANBP1	196.06/119.93/138.97	4.0442/46.757/104.49	138.97	46.757	-1.5513	1810.8	2176.4	2.0023	0.022629	0.97737	0.045258	0.39054	FALSE
GTF3A_14	GTF3A	220.45/218.2/152.65	100.3/90.093/190.74	218.2	100.3	-1.1137	2150.8	3483.5	1.9996	0.022771	0.97723	0.045543	0.39227	FALSE
SUMO2_15	SUMO2	213.22/48.303/128.17	40.442/35.353/102	128.17	40.442	-1.6401	6806.3	2000.3	1.9976	0.022879	0.97712	0.045758	0.39351	FALSE
ELOF1_3	ELOF1	21.684/98.272/167.05	24.265/12.545/126.88	98.272	24.265	-1.9742	5298.2	1516.5	1.9952	0.023012	0.97699	0.046025	0.394	FALSE
INSR_8	INSR	281.89/133.25/189.37	33.971/107.2/80.441	189.37	80.441	-1.225	5854.3	3005.1	1.992	0.023185	0.97682	0.04637	0.39587	FALSE
MBTPS1_11	MBTPS1	64.147/124.92/213.85	147.21/38.774/29.025	124.92	38.774	-1.6626	5801.2	1947.5	1.9918	0.023194	0.97681	0.046389	0.39587	FALSE
NAA38_3	NAA38	107.51/113.26/48.963	29.118/126.59/29.025	107.51	29.118	-1.8492	1730.7	1665.5	1.9908	0.02325	0.97675	0.046501	0.39587	FALSE
TMEM67_14	TMEM67	17.166/69.957/102.25	4.0442/26.23/12.439	69.957	12.439	-2.4005	1914.7	1064.1	1.9898	0.023309	0.97669	0.046618	0.39649	FALSE
EXOC3_12	EXOC3	20.78/191.55/202.33	73.604/124.31/82.1	191.55	82.1	-1.2123	14639	3041.1	1.9892	0.023338	0.97666	0.046676	0.39671	FALSE
EXOC2_9	EXOC2	90.349/91.61/32.402	19.412/77.549/20.732	90.349	20.732	-2.0715	1679.7	1389.2	1.9881	0.023402	0.9766	0.046804	0.39692	FALSE
GTF2A2_8	GTF2A2	0/43.306/42.483	4.853/47.898/4.9757	42.483	4.9757	-2.8633	902.73	632.63	1.9878	0.023415	0.97659	0.04683	0.39692	FALSE
METTL14_11	METTL14	33.429/108.27/148.33	13.75/29.651/105.32	108.27	29.651	-1.8338	3602.9	1677.6	1.987	0.023459	0.97654	0.046919	0.39739	FALSE
KIAA1432_5	KIAA1432	82.217/329.8/289.46	153.68/61.583/211.47	289.46	153.68	-0.90906	22288	4677.2	1.9856	0.023539	0.97646	0.047078	0.39764	FALSE
KIAA1432_4	KIAA1432	461.68/266.5/205.93	139.93/58.161/136.83	266.5	136.83	-0.95662	20882	4291	1.9799	0.023858	0.97614	0.047715	0.40108	FALSE
SEZ6L2_15	SEZ6L2	96.673/91.61/51.843	7.2795/21.668/41.465	91.61	21.668	-2.0305	803.5	1409.5	1.9762	0.024068	0.97593	0.048136	0.4031	FALSE
CHD7_4	CHD7	99.383/38.31/98.647	19.412/25.089/51.416	98.647	25.089	-1.9334	1820.5	1522.5	1.9754	0.02411	0.97589	0.04822	0.4031	FALSE
NUDT21_7	NUDT21	0/23.319/10.081	0/0/50.587	10.081	0	-3.47	138.43	141.25	1.972	0.024307	0.97569	0.048613	0.40417	FALSE
SEC61B_13	SEC61B	109.32/94.941/193.69	25.074/30.791/64.685	109.32	30.791	-1.795	3662.6	1694.7	1.9711	0.024357	0.97564	0.048715	0.40474	FALSE
MGAT1_14	MGAT1	214.13/206.54/165.61	93.825/206.42/80.441	206.54	93.825	-1.13	866.32	3289.6	1.9679	0.024542	0.97546	0.049083	0.40618	FALSE
USP39_11	USP39	194.25/123.26/76.325	25.883/38.774/48.099	123.26	38.774	-1.6434	3621.3	1920.5	1.9679	0.024543	0.97546	0.049085	0.40618	FALSE
RABIF_4	RABIF	66.858/171.56/269.3	69.56/122.03/63.026	171.56	69.56	-1.2902	10258	2711	1.9673	0.024575	0.97542	0.04915	0.40642	FALSE
MRPS21_15	MRPS21	147.27/19.988/183.61	49.339/53.6/82.1	147.27	53.6	-1.4412	8760.6	2312	1.9662	0.024636	0.97536	0.049272	0.40653	FALSE
ZW10_9	ZW10	144.56/31.647/54.004	7.2795/7.9829/39.806	54.004	7.9829	-2.6143	4349.9	812.42	1.9625	0.024854	0.97515	0.049708	0.40815	FALSE
RABIF_1	RABIF	56.016/226.53/113.05	33.162/45.617/20.732	113.05	33.162	-1.7392	8065	1754.9	1.9622	0.024869	0.97513	0.049737	0.40815	FALSE
CHD7_11	CHD7	209.61/81.616/84.966	42.059/17.106/19.074	84.966	19.074	-2.0985	7773.5	1303.1	1.9615	0.024912	0.97509	0.049824	0.40815	FALSE
DNAL4_10	DNAL4	127.39/353.11/259.22	198.16/128.87/132.69	259.22	132.69	-0.96086	13097	4168.8	1.9602	0.024987	0.97501	0.049973	0.40815	FALSE
CPSF4_4	CPSF4	0/49.969/13.681	0/1.1404/61.368	13.681	1.1404	-2.778	752	194.18	1.959	0.025059	0.97494	0.050118	0.40815	FALSE
ACTR6_3	ACTR6	18.973/54.966/8.6406	0.80884/3.4213/1.6586	18.973	1.6586	-2.9093	701.12	273.05	1.9589	0.02506	0.97494	0.050119	0.40815	FALSE
HYOU1_11	HYOU1	0/71.622/51.843	50.148/5.7021/7.4636	51.843	7.4636	-2.6424	1539.5	778.58	1.9588	0.025067	0.97493	0.050134	0.40815	FALSE
TM9SF2_2	TM9SF2	124.68/46.638/79.925	16.986/10.264/24.879	79.925	16.986	-2.1698	1555.6	1222.6	1.9587	0.025073	0.97493	0.050146	0.40815	FALSE
TAF7_10	TAF7	146.36/103.27/154.81	53.383/50.179/60.538	146.36	53.383	-1.4382	964.27	2297.2	1.9584	0.025091	0.97491	0.050181	0.40815	FALSE
STAG2_15	STAG2	64.147/116.59/208.81	16.986/35.353/77.124	116.59	35.353	-1.6937	5627.6	1812.4	1.9571	0.025168	0.97483	0.050336	0.40827	FALSE
ALG2_4	ALG2	71.375/81.616/23.042	7.2795/13.685/30.684	71.375	13.685	-2.3011	1220.5	1086.6	1.9557	0.025248	0.97475	0.050495	0.40922	FALSE
MESDC2_11	MESDC2	93.059/236.52/256.34	154.49/116.32/26.537	236.52	116.32	-1.0176	10487	3789	1.9537	0.025369	0.97463	0.050738	0.41045	FALSE
GFER_4	GFER	173.47/71.622/126.01	13.75/41.055/47.27	126.01	41.055	-1.5946	2605.2	1965.2	1.9518	0.025478	0.97452	0.050956	0.41159	FALSE
CHAF1B_1	CHAF1B	47.885/84.947/108.73	19.412/29.651/4.9757	84.947	19.412	-2.074	969.56	1302.8	1.949	0.025649	0.97435	0.051298	0.41347	FALSE
NonTargeting_Human_0028	NonTargeting_Human_0028	310.8/188.22/278.66	148.02/261.16/106.15	278.66	148.02	-0.90819	4606.4	4495.3	1.9488	0.025662	0.97434	0.051324	0.41347	FALSE
USP22_8	USP22	89.445/224.86/191.53	144.78/84.391/41.465	191.53	84.391	-1.1729	5766.3	3040.8	1.9471	0.02576	0.97424	0.051521	0.41451	FALSE
INTS8_3	INTS8	103/104.93/29.522	28.309/20.528/41.465	103	28.309	-1.8271	2701.2	1592.6	1.9459	0.025835	0.97416	0.051671	0.41513	FALSE
CDC73_5	CDC73	87.638/88.279/59.044	8.8972/25.089/20.732	87.638	20.732	-2.0281	409.02	1345.8	1.9454	0.025863	0.97414	0.051725	0.41513	FALSE
OSTC_12	OSTC	206.9/168.23/138.25	168.24/68.425/64.685	168.23	68.425	-1.2854	1197	2656.1	1.9453	0.025867	0.97413	0.051734	0.41513	FALSE
PHKG2_5	PHKG2	113.84/174.89/231.86	242.65/29.651/72.978	174.89	72.978	-1.2495	3486.1	2765.9	1.9449	0.025892	0.97411	0.051784	0.41526	FALSE
SPI1_15	SPI1	375.85/76.619/200.89	63.898/143.69/91.222	200.89	91.222	-1.1304	23027	3195.9	1.943	0.026007	0.97399	0.052013	0.41651	FALSE
KLHL20_4	KLHL20	139.14/79.95/52.563	48.53/0/17.415	79.95	17.415	-2.1361	2126.5	1223	1.9425	0.02604	0.97396	0.05208	0.41651	FALSE
UBA2_2	UBA2	101.19/29.981/56.884	8.0884/70.706/9.1222	56.884	9.1222	-2.5156	1343.4	857.64	1.9416	0.026091	0.97391	0.052181	0.41653	FALSE
CPSF3L_10	CPSF3L	0/9.9938/9.3606	0/5.7021/0	9.3606	0	-3.373	44.011	130.75	1.9404	0.026167	0.97383	0.052334	0.41695	FALSE
MBTPS1_7	MBTPS1	1.807/126.59/105.13	69.56/29.651/4.9757	105.13	29.651	-1.7918	5567.8	1626.9	1.9398	0.026201	0.9738	0.052403	0.41695	FALSE
INTS1_14	INTS1	121.97/129.92/151.21	7.2795/61.583/43.952	129.92	43.952	-1.5422	258.24	2028.8	1.939	0.026249	0.97375	0.052497	0.41704	FALSE
RAB28_12	RAB28	123.78/121.59/24.482	107.58/29.651/38.977	121.59	38.977	-1.6166	4717.5	1893.4	1.9386	0.026276	0.97372	0.052553	0.41704	FALSE
DPAGT1_12	DPAGT1	6.3244/56.632/72.005	118.9/9.1234/0.82929	56.632	9.1234	-2.5092	1383.6	853.68	1.937	0.026372	0.97363	0.052744	0.41829	FALSE
CEBPA_7	CEBPA	37.043/71.622/71.285	52.574/10.264/14.098	71.285	14.098	-2.2593	586.31	1085.1	1.9357	0.02645	0.97355	0.0529	0.41898	FALSE
ZNF646_1	ZNF646	230.39/78.285/153.37	59.045/83.251/53.904	153.37	59.045	-1.3623	5784.8	2412	1.9346	0.026519	0.97348	0.053037	0.41936	FALSE
OR56A1_12	OR56A1	394.82/303.15/149.77	227.28/167.64/121.08	303.15	167.64	-0.8508	15964	4908	1.9343	0.026537	0.97346	0.053075	0.41936	FALSE
TPI1_9	TPI1	261.11/226.53/90.726	198.97/68.425/110.3	226.53	110.3	-1.0316	9818.8	3622.2	1.9325	0.026646	0.97335	0.053292	0.42017	FALSE
CHD7_9	CHD7	115.65/226.53/300.26	160.96/65.004/110.3	226.53	110.3	-1.0316	8865.5	3622.2	1.9325	0.026646	0.97335	0.053292	0.42017	FALSE
NXF2_2	NXF2	164.43/124.92/59.764	41.251/80.97/27.367	124.92	41.251	-1.5755	2903.4	1947.5	1.9313	0.02672	0.97328	0.05344	0.42022	FALSE
TMEM67_13	TMEM67	261.11/231.52/73.445	92.207/114.04/165.86	231.52	114.04	-1.0152	12932	3705.5	1.9311	0.026738	0.97326	0.053477	0.42022	FALSE
PGS1_12	PGS1	46.078/188.22/146.89	55.001/55.881/38.147	146.89	55.001	-1.401	5935.5	2305.8	1.9308	0.026756	0.97324	0.053511	0.42022	FALSE
TMEM165_10	TMEM165	20.78/114.93/78.485	99.487/17.106/14.098	78.485	17.106	-2.1342	2329	1199.6	1.9305	0.026775	0.97322	0.053551	0.42022	FALSE
NCBP2_4	NCBP2	189.73/103.27/48.243	5.6618/103.78/29.025	103.27	29.025	-1.7961	5251.8	1597	1.9293	0.026845	0.97316	0.053689	0.42022	FALSE
DHRSX_7	DHRSX	257.49/179.89/263.54	79.266/133.43/301.86	257.49	133.43	-0.94328	3029.5	4139.9	1.9287	0.026885	0.97311	0.05377	0.42022	FALSE
GIGYF2_5	GIGYF2	299.96/294.82/244.1	194.12/85.532/161.71	294.82	161.71	-0.86239	1299.5	4767.5	1.9279	0.026933	0.97307	0.053866	0.42022	FALSE
KAT7_14	KAT7	116.55/129.92/90.006	84.119/36.493/11.61	116.55	36.493	-1.6486	441.66	1811.6	1.927	0.02699	0.97301	0.05398	0.42022	FALSE
SUMO2_13	SUMO2	38.85/44.972/28.082	4.853/2.2808/41.465	38.85	4.853	-2.7673	76.716	576.34	1.9269	0.026993	0.97301	0.053987	0.42022	FALSE
TMEM165_4	TMEM165	287.31/431.4/354.98	208.68/83.251/227.23	354.98	208.68	-0.76362	5209.6	5786.1	1.9234	0.027215	0.97279	0.05443	0.42249	FALSE
MSTO1_2	MSTO1	131.01/166.56/115.21	45.295/66.144/29.854	131.01	45.295	-1.5117	756.97	2046.5	1.9232	0.02723	0.97277	0.054461	0.42249	FALSE
UBE2O_15	UBE2O	241.23/176.56/86.406	67.942/75.268/86.246	176.56	75.268	-1.2191	6155	2793.4	1.9229	0.027246	0.97275	0.054493	0.42249	FALSE
ELOF1_14	ELOF1	112.03/131.59/74.885	81.692/34.213/29.025	112.03	34.213	-1.6826	881.11	1738.5	1.9191	0.027487	0.97251	0.054974	0.42492	FALSE
RTBDN_3	RTBDN	297.25/319.8/256.34	222.43/164.22/68.002	297.25	164.22	-0.85211	1091.2	4808.4	1.9185	0.027522	0.97248	0.055045	0.4252	FALSE
MBTPS2_10	MBTPS2	196.06/74.953/48.963	15.368/15.966/52.245	74.953	15.966	-2.1625	7670.7	1143.4	1.9176	0.027583	0.97242	0.055165	0.42543	FALSE
C21orf59_6	C21orf59	205.99/351.45/379.47	268.53/206.42/158.39	351.45	206.42	-0.76488	10971	5726	1.9167	0.027641	0.97236	0.055281	0.42543	FALSE
COG2_7	COG2	94.866/173.23/145.45	78.457/54.74/41.465	145.45	54.74	-1.3936	1665.1	2282.3	1.9163	0.027666	0.97233	0.055331	0.42543	FALSE
LRRC8A_8	LRRC8A	228.58/111.6/231.86	313.02/66.144/112.78	228.58	112.78	-1.0127	6848	3656.5	1.9162	0.02767	0.97233	0.055339	0.42543	FALSE
TAF2_6	TAF2	92.155/246.51/274.34	126.18/104.92/154.25	246.51	126.18	-0.96066	12300	3956	1.9139	0.027817	0.97218	0.055635	0.42681	FALSE
STAG2_6	STAG2	70.472/33.313/36.722	0/4.5617/10.781	36.722	4.5617	-2.7618	575.32	543.48	1.9131	0.027866	0.97213	0.055732	0.42681	FALSE
MARS2_7	MARS2	184.31/181.55/156.25	79.266/50.179/162.54	181.55	79.266	-1.1855	323.94	2875.8	1.9128	0.027888	0.97211	0.055777	0.42681	FALSE
CTDP1_14	CTDP1	28.008/36.644/39.603	0/4.5617/43.123	36.644	4.5617	-2.7588	41.666	542.27	1.9114	0.027973	0.97203	0.055947	0.42757	FALSE
PGA3_9	PGA3	119.26/151.57/151.21	77.648/28.511/58.88	151.21	58.88	-1.3459	510.47	2376.6	1.9082	0.028181	0.97182	0.056363	0.42994	FALSE
SMNDC1_13	SMNDC1	82.217/111.6/42.483	15.368/19.387/54.733	82.217	19.387	-2.0292	1221	1259.1	1.9056	0.028349	0.97165	0.056699	0.43224	FALSE
NCBP1_15	NCBP1	30.718/29.981/25.922	0/3.4213/59.709	29.981	3.4213	-2.8089	8.5121	439.92	1.9043	0.028433	0.97157	0.056867	0.4329	FALSE
SRP9_2	SRP9	85.831/176.56/158.41	129.41/63.864/32.342	158.41	63.864	-1.2973	2798.5	2494.7	1.9041	0.028446	0.97155	0.056892	0.4329	FALSE
AQP10_6	AQP10	157.21/221.53/239.78	108.38/94.655/195.71	221.53	108.38	-1.0246	2235.2	3538.9	1.9034	0.028493	0.97151	0.056986	0.43323	FALSE
NonTargeting_Human_0823	NonTargeting_Human_0823	59.63/176.56/213.13	61.472/156.24/76.295	176.56	76.295	-1.1998	7504.9	2793.4	1.9032	0.028506	0.97149	0.057011	0.43323	FALSE
CABIN1_11	CABIN1	189.73/293.15/123.85	169.86/85.532/50.587	189.73	85.532	-1.1402	7518.1	3011	1.903	0.028521	0.97148	0.057042	0.43323	FALSE
DENND4A_5	DENND4A	103/48.303/51.843	119.71/1.1404/8.2929	51.843	8.2929	-2.5075	1314.6	778.58	1.9017	0.028606	0.97139	0.057211	0.43369	FALSE
ELOF1_2	ELOF1	292.73/44.972/192.97	79.266/115.18/87.905	192.97	87.905	-1.1255	15928	3064.7	1.9016	0.028615	0.97139	0.057229	0.43369	FALSE
CTR9_7	CTR9	33.429/41.641/7.9205	4.0442/37.634/1.6586	33.429	4.0442	-2.7709	359.06	492.77	1.9011	0.028643	0.97136	0.057287	0.43369	FALSE
MED8_10	MED8	29.815/19.988/85.686	0/3.4213/27.367	29.815	3.4213	-2.8011	1609.1	437.37	1.9004	0.028688	0.97131	0.057376	0.43369	FALSE
DYRK1A_5	DYRK1A	499.63/314.8/307.46	136.69/179.05/180.79	314.8	179.05	-0.81067	17107	5104.9	1.9002	0.028706	0.97129	0.057412	0.43369	FALSE
UBE2I_6	UBE2I	29.815/16.656/16.561	1.6177/119.74/0.82929	16.656	1.6177	-2.7538	86.58	238.39	1.9001	0.028713	0.97129	0.057426	0.43369	FALSE
AHSP_14	AHSP	140.94/121.59/138.97	121.33/51.319/33.172	138.97	51.319	-1.4197	152.95	2176.4	1.8998	0.028729	0.97127	0.057458	0.43369	FALSE
MED8_9	MED8	1.807/76.619/59.044	10.515/20.528/7.4636	59.044	10.515	-2.3825	1792.5	891.62	1.8995	0.028747	0.97125	0.057495	0.4337	FALSE
COPS8_2	COPS8	93.962/88.279/51.123	26.692/19.387/22.391	88.279	22.391	-1.9324	706.41	1356.1	1.8992	0.028768	0.97123	0.057537	0.4337	FALSE
USO1_10	USO1	98.48/94.941/88.566	12.941/66.144/25.708	94.941	25.708	-1.8449	26.583	1462.9	1.8987	0.028801	0.9712	0.057601	0.4337	FALSE
SETDB1_15	SETDB1	290.02/194.88/117.37	242.65/80.97/89.563	194.88	89.563	-1.113	7529.8	3096.2	1.8961	0.028976	0.97102	0.057953	0.43581	FALSE
PFDN6_10	PFDN6	36.139/118.26/130.33	35.589/38.774/41.465	118.26	38.774	-1.5842	3444.7	1839.4	1.8944	0.029089	0.97091	0.058177	0.43647	FALSE
GET4_6	GET4	203.28/229.86/180.73	164.19/95.795/85.417	203.28	95.795	-1.0776	607.37	3235.6	1.8922	0.02923	0.97077	0.05846	0.4372	FALSE
CHAF1B_9	CHAF1B	42.464/8.3282/7.9205	0/12.545/0	8.3282	0	-3.2216	582.7	115.76	1.8913	0.029293	0.97071	0.058587	0.43734	FALSE
CDC23_8	CDC23	400.24/263.17/186.49	102.72/176.77/140.15	263.17	140.15	-0.90424	12334	4235.1	1.8907	0.02933	0.97067	0.05866	0.43735	FALSE
CEBPA_3	CEBPA	37.043/16.656/96.486	4.853/1.1404/54.733	37.043	4.853	-2.7004	1974.6	548.43	1.8888	0.02946	0.97054	0.058921	0.43837	FALSE
PRMT1_10	PRMT1	147.27/149.91/134.65	33.162/145.97/57.221	147.27	57.221	-1.3486	83.103	2312	1.8884	0.029489	0.97051	0.058979	0.43839	FALSE
KMT2D_11	KMT2D	36.139/246.51/137.53	50.957/111.76/23.22	137.53	50.957	-1.4148	11079	2152.9	1.8873	0.029559	0.97044	0.059119	0.43893	FALSE
RUVBL2_8	RUVBL2	236.71/209.87/149.05	136.69/69.566/101.17	209.87	101.17	-1.0453	2209.8	3344.9	1.8814	0.029957	0.97004	0.059913	0.44143	FALSE
EIF3C_11	EIF3C	8.1314/3.3313/16.561	0/6.8425/0	8.1314	0	-3.1908	47.051	112.91	1.8813	0.029963	0.97004	0.059926	0.44143	FALSE
NXF5_10	NXF5	151.79/149.91/117.37	32.353/59.302/208.98	149.91	59.302	-1.3234	531.16	2355.2	1.8811	0.029979	0.97002	0.059959	0.44143	FALSE
NLRP8_13	NLRP8	208.71/124.92/47.523	46.912/43.336/25.708	124.92	43.336	-1.506	6505.1	1947.5	1.8809	0.029995	0.97	0.05999	0.44143	FALSE
SNX19_12	SNX19	293.63/68.291/195.13	90.59/141.41/41.465	195.13	90.59	-1.0986	12896	3100.4	1.8808	0.030001	0.97	0.060003	0.44143	FALSE
CCDC43_10	CCDC43	133.72/66.625/123.13	32.353/130.01/42.294	123.13	42.294	-1.5196	1652.3	1918.4	1.8796	0.030084	0.96992	0.060168	0.44238	FALSE
TAF1B_13	TAF1B	66.858/6.6625/62.644	12.133/18.247/0	62.644	12.133	-2.2769	1575.8	948.37	1.8787	0.030145	0.96985	0.060291	0.44255	FALSE
DPAGT1_15	DPAGT1	50.595/14.991/47.523	0.80884/10.264/7.4636	47.523	7.4636	-2.5193	533.9	711.06	1.8766	0.030283	0.96972	0.060567	0.44352	FALSE
NonTargeting_Human_0363	NonTargeting_Human_0363	152.69/158.24/98.647	143.97/44.476/61.368	152.69	61.368	-1.3011	1475.7	2400.8	1.8766	0.030289	0.96971	0.060578	0.44352	FALSE
NonTargeting_Human_0949	NonTargeting_Human_0949	0/79.95/53.284	88.972/9.1234/3.3172	53.284	9.1234	-2.4228	1775.1	801.14	1.8752	0.030383	0.96962	0.060765	0.44423	FALSE
MBTPS1_15	MBTPS1	117.45/183.22/131.77	73.604/47.898/45.611	131.77	47.898	-1.4411	1426.1	2058.9	1.8737	0.030487	0.96951	0.060975	0.44441	FALSE
GTPBP5_9	GTPBP5	28.008/26.65/28.082	0.80884/4.5617/3.3172	28.008	3.3172	-2.7483	0.92469	409.78	1.8722	0.030589	0.96941	0.061178	0.44498	FALSE
CHAF1B_11	CHAF1B	0/26.65/7.9205	0/5.7021/0	7.9205	0	-3.1571	206.77	109.86	1.8704	0.030711	0.96929	0.061422	0.44622	FALSE
SRP19_6	SRP19	82.217/39.975/1.4401	12.133/5.7021/2.4879	39.975	5.7021	-2.6121	1634.7	593.75	1.8678	0.030895	0.9691	0.06179	0.44747	FALSE
RAB13_4	RAB13	234/256.51/190.09	95.443/119.74/155.08	234	119.74	-0.96072	1217.3	3746.9	1.8675	0.030915	0.96909	0.06183	0.44747	FALSE
WARS_8	WARS	162.63/1.6656/114.49	76.031/37.634/2.4879	114.49	37.634	-1.5798	7523.1	1778.2	1.8666	0.030977	0.96902	0.061954	0.44747	FALSE
HTRA2_5	HTRA2	10.842/91.61/110.17	11.324/25.089/62.197	91.61	25.089	-1.8277	3433.9	1409.5	1.8649	0.031097	0.9689	0.062193	0.44836	FALSE
NonTargeting_Human_0942	NonTargeting_Human_0942	318.03/253.18/234.02	118.9/290.81/134.35	253.18	134.35	-0.90919	2286.4	4067.6	1.8637	0.031181	0.96882	0.062363	0.44878	FALSE
EEFSEC_2	EEFSEC	52.402/173.23/131.05	84.928/47.898/43.952	131.05	47.898	-1.4332	3982.1	2047.2	1.8631	0.031221	0.96878	0.062441	0.44908	FALSE
TBC1D22A_1	TBC1D22A	218.64/218.2/121.69	151.25/108.34/58.05	218.2	108.34	-1.0034	4657.2	3483.5	1.8628	0.031242	0.96876	0.062485	0.44913	FALSE
C1orf198_12	C1orf198	423.73/63.294/138.25	52.574/110.62/50.587	138.25	52.574	-1.3781	43560	2164.6	1.8614	0.031341	0.96866	0.062682	0.45029	FALSE
PGM1_10	PGM1	238.52/116.59/262.1	139.12/107.2/123.56	238.52	123.56	-0.94326	7710.9	3822.4	1.8601	0.031433	0.96857	0.062865	0.45107	FALSE
KIAA1328_13	KIAA1328	155.4/144.91/119.53	50.957/57.021/115.27	144.91	57.021	-1.3304	377.14	2273.4	1.8593	0.031495	0.9685	0.06299	0.45151	FALSE
FURIN_7	FURIN	347.84/264.84/128.17	97.06/339.85/143.47	264.84	143.47	-0.87979	12784	4263.1	1.8592	0.0315	0.9685	0.063001	0.45151	FALSE
RNMT_1	RNMT	113.84/88.279/133.21	21.03/37.634/54.733	113.84	37.634	-1.5717	514.26	1767.7	1.8567	0.031674	0.96833	0.063347	0.45304	FALSE
MDH1_7	MDH1	92.155/11.659/21.601	2.4265/28.511/0	21.601	2.4265	-2.7216	2538.4	312.59	1.8566	0.031681	0.96832	0.063363	0.45304	FALSE
ADAMTSL1_6	ADAMTSL1	160.82/136.58/161.29	67.942/52.459/103.66	160.82	67.942	-1.2309	293.86	2534.3	1.8544	0.031844	0.96816	0.063688	0.45467	FALSE
SLX4_15	SLX4	153.59/84.947/172.81	63.089/46.757/167.52	153.59	63.089	-1.2703	2540.8	2415.6	1.8533	0.031921	0.96808	0.063842	0.45487	FALSE
ALG2_1	ALG2	101.19/68.291/63.364	11.324/14.825/48.099	68.291	14.825	-2.1304	553.32	1037.7	1.8519	0.032022	0.96798	0.064045	0.45525	FALSE
TRIAP1_3	TRIAP1	140.94/224.86/280.1	114.05/61.583/155.91	224.86	114.05	-0.97322	5046.6	3594.4	1.8495	0.032191	0.96781	0.064382	0.45685	FALSE
SYS1_11	SYS1	131.01/73.288/122.41	83.31/42.196/43.123	122.41	43.123	-1.4838	1243.4	1906.7	1.8486	0.032258	0.96774	0.064516	0.45727	FALSE
DHDDS_8	DHDDS	174.37/123.26/84.966	43.677/117.46/42.294	123.26	43.677	-1.4757	2039.5	1920.5	1.8478	0.032313	0.96769	0.064625	0.45765	FALSE
BTF3_15	BTF3	205.99/218.2/86.406	100.3/36.493/189.91	205.99	100.3	-1.031	7225.2	3280.6	1.8476	0.032332	0.96767	0.064664	0.45765	FALSE
SAFB_2	SAFB	71.375/263.17/128.17	92.207/46.757/30.684	128.17	46.757	-1.4355	10725	2000.3	1.8474	0.032346	0.96765	0.064692	0.45765	FALSE
HYOU1_6	HYOU1	177.08/171.56/295.22	75.222/163.08/79.612	177.08	79.612	-1.1435	6993.4	2802	1.8468	0.032386	0.96761	0.064773	0.45765	FALSE
NonTargeting_Human_0846	NonTargeting_Human_0846	539.38/336.46/228.98	204.64/183.61/199.86	336.46	199.86	-0.74852	26365	5471.6	1.8467	0.032395	0.96761	0.064789	0.45765	FALSE
NID1_4	NID1	150.88/174.89/80.645	183.61/61.583/51.416	150.88	61.583	-1.2791	2754.8	2371.2	1.8467	0.032398	0.9676	0.064795	0.45765	FALSE
GNB2L1_14	GNB2L1	73.182/74.953/18.721	16.986/12.545/29.025	73.182	16.986	-2.0442	1484.6	1115.3	1.8458	0.032459	0.96754	0.064918	0.45799	FALSE
CLEC12B_11	CLEC12B	215.03/74.953/183.61	23.456/84.391/156.74	183.61	84.391	-1.1123	6396.9	2909.8	1.8438	0.032609	0.96739	0.065217	0.45957	FALSE
ARL8A_4	ARL8A	164.43/138.25/132.49	53.383/26.23/67.173	138.25	53.383	-1.3564	359.46	2164.6	1.8434	0.032638	0.96736	0.065276	0.45962	FALSE
TAF1_9	TAF1	385.79/373.1/241.22	368.02/229.22/208.98	373.1	229.22	-0.70039	8777.4	6094.3	1.843	0.032663	0.96734	0.065325	0.45962	FALSE
GPN3_13	GPN3	151.79/196.54/227.54	75.222/225.8/93.71	196.54	93.71	-1.0606	1481.9	3123.8	1.8428	0.032679	0.96732	0.065358	0.45962	FALSE
PITPNM2_2	PITPNM2	204.19/176.56/198.73	253.97/82.11/95.368	198.73	95.368	-1.0514	260.77	3160.1	1.8414	0.032779	0.96722	0.065558	0.45976	FALSE
ATP5O_9	ATP5O	11.745/104.93/135.37	25.883/33.072/68.002	104.93	33.072	-1.6365	4805.3	1623.8	1.841	0.032811	0.96719	0.065621	0.45976	FALSE
PIAS1_6	PIAS1	152.69/158.24/98.647	63.089/38.774/124.39	152.69	63.089	-1.2619	1475.7	2400.8	1.8406	0.032841	0.96716	0.065683	0.45984	FALSE
NonTargeting_Human_0153	NonTargeting_Human_0153	322.54/293.15/226.82	125.37/166.5/262.06	293.15	166.5	-0.81238	2632.2	4739.4	1.8398	0.032897	0.9671	0.065794	0.46017	FALSE
SMNDC1_14	SMNDC1	47.885/54.966/20.161	8.0884/84.391/6.6343	47.885	8.0884	-2.4273	409.36	716.7	1.8391	0.032948	0.96705	0.065896	0.46017	FALSE
PPIL2_5	PPIL2	255.69/249.84/196.57	174.71/133.43/121.91	249.84	133.43	-0.89995	1436	4011.8	1.8385	0.032994	0.96701	0.065987	0.46048	FALSE
URI1_5	URI1	84.928/121.59/134.65	143.97/15.966/43.123	121.59	43.123	-1.4742	757.36	1893.4	1.8363	0.033156	0.96684	0.066311	0.46195	FALSE
VPS72_13	VPS72	258.4/176.56/118.81	59.854/79.829/165.86	176.56	79.829	-1.1353	5016.4	2793.4	1.8356	0.033209	0.96679	0.066419	0.46243	FALSE
WBSCR16_5	WBSCR16	105.71/44.972/97.206	102.72/25.089/29.025	97.206	29.025	-1.7096	1400.4	1499.3	1.8343	0.033306	0.96669	0.066612	0.46325	FALSE
GSK3B_5	GSK3B	143.65/146.58/89.286	57.427/53.6/145.96	143.65	57.427	-1.3079	1482.2	2252.9	1.8325	0.03344	0.96656	0.06688	0.46439	FALSE
DHX36_11	DHX36	52.402/38.31/10.801	25.074/5.7021/0	38.31	5.7021	-2.5522	477.67	567.99	1.8323	0.033454	0.96655	0.066908	0.46439	FALSE
CDC73_12	CDC73	0/43.306/7.2005	0.80884/0/39.806	7.2005	0.80884	-2.1806	677.74	99.469	1.8312	0.033532	0.96647	0.067065	0.46454	FALSE
CSNK1A1_4	CSNK1A1	29.815/168.23/105.85	33.971/93.515/20.732	105.85	33.971	-1.6113	4836.2	1638.5	1.8306	0.033583	0.96642	0.067166	0.4648	FALSE
TOMM22_13	TOMM22	0.90349/83.282/69.845	32.353/15.966/0	69.845	15.966	-2.062	2466.7	1062.3	1.8298	0.033638	0.96636	0.067275	0.46521	FALSE
STK11_14	STK11	318.03/314.8/187.21	264.49/180.19/184.1	314.8	184.1	-0.77071	8145.1	5104.9	1.8294	0.033672	0.96633	0.067343	0.46542	FALSE
SYTL3_10	SYTL3	249.36/219.86/95.766	111.62/152.82/73.807	219.86	111.62	-0.9717	8135.1	3511.2	1.8281	0.033769	0.96623	0.067538	0.4659	FALSE
PRMT1_11	PRMT1	76.796/98.272/48.963	8.8972/88.953/19.074	76.796	19.074	-1.9544	617.95	1172.7	1.8264	0.033899	0.9661	0.067797	0.46591	FALSE
TFAM_14	TFAM	45.174/111.6/111.61	36.398/37.634/92.881	111.6	37.634	-1.5432	2206	1731.5	1.8223	0.034208	0.96579	0.068415	0.46884	FALSE
NonTargeting_Human_0556	NonTargeting_Human_0556	171.66/136.58/137.53	46.104/208.7/53.904	137.53	53.904	-1.3352	582.98	2152.9	1.8213	0.034282	0.96572	0.068564	0.4696	FALSE
KLHDC7B_10	KLHDC7B	142.75/126.59/72.725	46.912/96.936/36.489	126.59	46.912	-1.413	1581.2	1974.6	1.8202	0.034366	0.96563	0.068731	0.4697	FALSE
C19orf57_5	C19orf57	196.96/188.22/92.886	199.78/88.953/63.855	188.22	88.953	-1.0728	4582.2	2985.9	1.8202	0.034366	0.96563	0.068732	0.4697	FALSE
KCNK4_7	KCNK4	219.55/144.91/60.484	39.633/99.217/58.88	144.91	58.88	-1.2849	6349.2	2273.4	1.8191	0.034447	0.96555	0.068893	0.4697	FALSE
DNASE2_3	DNASE2	649.61/561.32/368.66	383.39/473.27/385.62	561.32	385.62	-0.54047	22455	9330.1	1.819	0.034459	0.96554	0.068917	0.4697	FALSE
ZNRF3_11	ZNRF3	182.5/151.57/200.89	84.928/214.4/30.684	182.5	84.928	-1.0946	647.46	2891.5	1.8189	0.03446	0.96554	0.06892	0.4697	FALSE
GTF2A2_11	GTF2A2	0/56.632/44.643	2.4265/13.685/7.4636	44.643	7.4636	-2.431	1068.4	666.2	1.8189	0.034463	0.96554	0.068925	0.4697	FALSE
IREB2_2	IREB2	84.024/24.984/76.325	17.794/66.144/19.074	76.325	19.074	-1.9456	1347.6	1165.2	1.8182	0.034513	0.96549	0.069026	0.47013	FALSE
SLC7A6OS_10	SLC7A6OS	200.57/228.19/103.69	99.487/98.076/68.002	200.57	98.076	-1.0247	5074.9	3190.6	1.817	0.034609	0.96539	0.069218	0.47117	FALSE
RPS14_5	RPS14	21.684/8.3282/20.161	2.4265/12.545/0.82929	20.161	2.4265	-2.6266	71.171	290.9	1.8152	0.034747	0.96525	0.069495	0.47252	FALSE
EXOC7_14	EXOC7	61.437/133.25/92.886	14.559/55.881/27.367	92.886	27.367	-1.7267	1309.2	1429.9	1.8144	0.034805	0.96519	0.069611	0.47293	FALSE
OR5AR1_6	OR5AR1	262.91/133.25/220.33	139.12/103.78/112.78	220.33	112.78	-0.95994	4698.3	3519	1.8143	0.034816	0.96518	0.069632	0.47293	FALSE
MED26_13	MED26	74.989/83.282/61.204	18.603/14.825/20.732	74.989	18.603	-1.9547	129.4	1144	1.8132	0.034904	0.9651	0.069808	0.47307	FALSE
INTS12_14	INTS12	229.49/251.51/228.26	119.71/160.8/66.343	229.49	119.71	-0.93316	243.31	3671.5	1.8127	0.034942	0.96506	0.069883	0.47332	FALSE
SMARCB1_7	SMARCB1	288.21/173.23/79.925	139.93/78.689/72.978	173.23	78.689	-1.1285	10963	2738.4	1.8123	0.034966	0.96503	0.069933	0.47339	FALSE
CHD7_14	CHD7	112.94/384.76/309.62	76.031/181.33/181.61	309.62	181.33	-0.76863	22166	5017.3	1.8113	0.035048	0.96495	0.070096	0.47424	FALSE
TAF2_3	TAF2	30.718/166.56/66.244	0.80884/33.072/14.927	66.244	14.927	-2.0779	5663	1005.3	1.8109	0.035078	0.96492	0.070156	0.47428	FALSE
SPSB3_15	SPSB3	291.83/303.15/270.02	237.8/143.69/167.52	291.83	167.52	-0.79715	301.86	4717	1.8101	0.035141	0.96486	0.070282	0.4747	FALSE
IRS1_7	IRS1	125.58/246.51/213.13	207.06/103.78/107.81	213.13	107.81	-0.97673	4389.6	3399.2	1.8081	0.035293	0.96471	0.070586	0.47559	FALSE
RPL28_1	RPL28	254.78/183.22/282.98	139.12/79.829/160.88	254.78	139.12	-0.86826	2958.2	4094.5	1.808	0.035304	0.9647	0.070608	0.47559	FALSE
IREB2_10	IREB2	43.367/33.313/1.4401	4.853/62.723/0	33.313	4.853	-2.5515	558.48	490.99	1.8056	0.035491	0.96451	0.070983	0.47697	FALSE
MARS2_5	MARS2	83.121/98.272/30.962	22.647/35.353/7.4636	83.121	22.647	-1.8308	1475	1273.6	1.8054	0.035509	0.96449	0.071017	0.47697	FALSE
GET4_10	GET4	225.87/249.84/167.77	140.74/117.46/98.686	225.87	117.46	-0.93743	1975.2	3611.3	1.805	0.035535	0.96446	0.07107	0.47697	FALSE
RAB5C_9	RAB5C	278.27/123.26/248.42	178.75/134.57/116.1	248.42	134.57	-0.87952	8278.2	3987.9	1.8033	0.035669	0.96433	0.071337	0.47807	FALSE
SETD1A_5	SETD1A	174.37/141.58/131.77	57.427/69.566/53.904	141.58	57.427	-1.287	585.84	2219	1.8025	0.035737	0.96426	0.071474	0.47836	FALSE
RBM4B_3	RBM4B	196.06/116.59/108.73	29.118/127.73/41.465	116.59	41.465	-1.4695	3188	1812.4	1.8013	0.035828	0.96417	0.071655	0.47888	FALSE
CDC14A_11	CDC14A	126.49/71.622/53.284	50.148/7.9829/17.415	71.622	17.415	-1.9795	1673.3	1090.5	1.8012	0.035838	0.96416	0.071676	0.47888	FALSE
SSR2_1	SSR2	107.51/123.26/138.97	71.986/27.37/45.611	123.26	45.611	-1.4146	247.35	1920.5	1.8011	0.035845	0.96416	0.071689	0.47888	FALSE
PTPMT1_11	PTPMT1	149.98/86.613/136.09	57.427/15.966/53.904	136.09	53.904	-1.3201	1320.4	2129.4	1.8001	0.035919	0.96408	0.071837	0.47888	FALSE
PLA2G10_2	PLA2G10	0/39.975/61.924	6.4707/4.5617/32.342	39.975	6.4707	-2.4554	1039.9	593.75	1.8	0.035934	0.96407	0.071867	0.47888	FALSE
hsa-mir-6859-1_2	hsa-mir-6859-1	0/6.6625/26.642	5.6618/0/0	6.6625	0	-2.9378	221.78	91.736	1.7996	0.03596	0.96404	0.07192	0.47888	FALSE
DARS_1	DARS	47.885/6.6625/6.4804	0/0/26.537	6.6625	0	-2.9378	849.65	91.736	1.7996	0.03596	0.96404	0.07192	0.47888	FALSE
RPL23A_14	RPL23A	1.807/6.6625/12.961	0/0/0.82929	6.6625	0	-2.9378	31.623	91.736	1.7996	0.03596	0.96404	0.07192	0.47888	FALSE
RPL13A_1	RPL13A	25.298/6.6625/5.0403	0/9.1234/0	6.6625	0	-2.9378	174.95	91.736	1.7996	0.03596	0.96404	0.07192	0.47888	FALSE
WRB_7	WRB	135.52/173.23/89.286	97.869/53.6/50.587	135.52	53.6	-1.3222	1779.7	2120.1	1.7986	0.036038	0.96396	0.072076	0.47966	FALSE
RHOT2_14	RHOT2	88.542/164.9/169.21	73.604/87.812/72.148	164.9	73.604	-1.153	2924.4	2601.3	1.7974	0.036139	0.96386	0.072279	0.47996	FALSE
FBXL5_11	FBXL5	112.03/93.275/28.802	116.47/4.5617/28.196	93.275	28.196	-1.6911	2254.3	1436.2	1.7954	0.036294	0.96371	0.072588	0.48133	FALSE
CABIN1_10	CABIN1	37.946/94.941/100.81	29.118/106.06/22.391	94.941	29.118	-1.6715	1641.4	1462.9	1.7948	0.03634	0.96366	0.07268	0.48142	FALSE
GTF3A_3	GTF3A	44.271/114.93/85.686	24.265/46.757/17.415	85.686	24.265	-1.7786	1285.2	1314.6	1.7941	0.036402	0.9636	0.072805	0.48162	FALSE
TRAPPC1_2	TRAPPC1	191.54/111.6/70.565	53.383/38.774/19.903	111.6	38.774	-1.5013	4037.2	1731.5	1.7925	0.036524	0.96348	0.073048	0.48243	FALSE
SNRPD1_14	SNRPD1	15.359/49.969/43.203	33.162/0/7.4636	43.203	7.4636	-2.3848	410.52	643.81	1.789	0.036804	0.9632	0.073608	0.48301	FALSE
NCAPG2_2	NCAPG2	268.34/166.56/136.09	75.222/137.99/62.197	166.56	75.222	-1.1364	5643.1	2628.7	1.7884	0.036853	0.96315	0.073706	0.48301	FALSE
SLC35A2_5	SLC35A2	151.79/116.59/122.41	32.353/45.617/129.37	122.41	45.617	-1.4045	448.42	1906.7	1.788	0.036885	0.96312	0.07377	0.48301	FALSE
FRY_11	FRY	84.928/171.56/267.86	74.413/163.08/78.783	171.56	78.783	-1.113	8389.2	2711	1.7877	0.03691	0.96309	0.07382	0.48301	FALSE
CEBPA_11	CEBPA	42.464/64.96/91.446	0/22.808/14.927	64.96	14.927	-2.0501	603.8	984.94	1.7876	0.036921	0.96308	0.073842	0.48301	FALSE
FNDC3B_6	FNDC3B	86.735/316.47/198.01	97.869/61.583/257.91	198.01	97.869	-1.0093	13208	3148.2	1.7873	0.036944	0.96306	0.073887	0.48301	FALSE
CABIN1_12	CABIN1	95.769/279.83/265.7	148.83/161.94/100.34	265.7	148.83	-0.83192	14538	4277.5	1.7872	0.036949	0.96305	0.073899	0.48301	FALSE
TOMM22_7	TOMM22	0/98.272/91.446	27.5/43.336/2.4879	91.446	27.5	-1.6976	4204.5	1406.8	1.7866	0.037	0.963	0.074	0.48301	FALSE
SAFB_13	SAFB	130.1/124.92/61.924	62.28/30.791/47.27	124.92	47.27	-1.3833	1997.8	1947.5	1.7866	0.037001	0.963	0.074002	0.48301	FALSE
NOMO1_7	NOMO1	114.74/236.52/230.42	122.13/172.2/97.856	230.42	122.13	-0.91025	6708.7	3687.1	1.7841	0.037201	0.9628	0.074403	0.4848	FALSE
SLC35F5_5	SLC35F5	158.11/216.53/68.405	54.192/69.566/170.83	158.11	69.566	-1.173	5730.1	2489.8	1.7835	0.037251	0.96275	0.074503	0.4848	FALSE
THOC6_14	THOC6	258.4/276.5/149.77	120.52/166.5/143.47	258.4	143.47	-0.84442	6063.7	4155.1	1.7833	0.037267	0.96273	0.074534	0.4848	FALSE
ACO2_9	ACO2	133.72/103.27/100.81	32.353/34.213/189.08	103.27	34.213	-1.5661	466.53	1597	1.783	0.037291	0.96271	0.074582	0.4848	FALSE
MPDU1_13	MPDU1	114.74/24.984/141.85	32.353/41.055/80.441	114.74	41.055	-1.4606	4395.7	1782.4	1.783	0.037295	0.96271	0.074589	0.4848	FALSE
hsa-mir-6886_1	hsa-mir-6886	48.788/209.87/161.29	9.706/71.847/155.91	161.29	71.847	-1.1556	7508.4	2542	1.7821	0.037365	0.96264	0.074729	0.4848	FALSE
NonTargeting_Human_0079	NonTargeting_Human_0079	250.27/236.52/203.77	116.47/245.19/126.88	236.52	126.88	-0.89324	630.63	3789	1.7819	0.037385	0.96262	0.074769	0.4848	FALSE
WDR61_7	WDR61	159.01/38.31/77.765	113.24/19.387/20.732	77.765	20.732	-1.8577	4079	1188.2	1.7814	0.037421	0.96258	0.074842	0.4848	FALSE
PIAS1_14	PIAS1	150.88/204.87/81.365	64.707/94.655/55.563	150.88	64.707	-1.2088	3873.8	2371.2	1.781	0.037453	0.96255	0.074907	0.4848	FALSE
TMEM30A_1	TMEM30A	6.3244/61.628/73.445	13.75/92.374/0	61.628	13.75	-2.0861	1599.1	932.35	1.7807	0.037477	0.96252	0.074954	0.4848	FALSE
INTS2_5	INTS2	30.718/76.619/108.73	20.221/15.966/47.27	76.619	20.221	-1.8709	1568.9	1169.9	1.7803	0.037513	0.96249	0.075026	0.4848	FALSE
CEBPZ_5	CEBPZ	130.1/76.619/53.284	20.221/11.404/54.733	76.619	20.221	-1.8709	1702.5	1169.9	1.7803	0.037513	0.96249	0.075026	0.4848	FALSE
PFDN2_11	PFDN2	18.973/86.613/84.246	16.177/23.949/104.49	84.246	23.949	-1.7727	2133	1291.6	1.7803	0.037517	0.96248	0.075034	0.4848	FALSE
PPIL2_3	PPIL2	166.24/114.93/162.73	111.62/54.74/72.978	162.73	72.978	-1.1462	1148.7	2565.7	1.7796	0.037569	0.96243	0.075139	0.48499	FALSE
CCDC101_9	CCDC101	96.673/31.647/92.166	5.6618/82.11/28.196	92.166	28.196	-1.674	1841.4	1418.4	1.7771	0.037775	0.96222	0.07555	0.48574	FALSE
EXOC2_1	EXOC2	195.15/186.55/183.61	73.604/90.093/111.13	186.55	90.093	-1.0419	41.315	2958.4	1.7769	0.03779	0.96221	0.07558	0.48574	FALSE
TAF7_1	TAF7	9.0349/156.57/162.01	120.52/49.038/68.831	156.57	68.831	-1.174	10898	2464.5	1.7767	0.037808	0.96219	0.075616	0.48574	FALSE
PROX1_6	PROX1	336.1/194.88/157.69	188.46/36.493/96.198	194.88	96.198	-1.011	10663	3096.2	1.7761	0.037855	0.96214	0.075711	0.48609	FALSE
LAMTOR4_1	LAMTOR4	89.445/201.54/165.61	32.353/75.268/134.35	165.61	75.268	-1.1273	3546.1	2613	1.7743	0.038009	0.96199	0.076019	0.48755	FALSE
SAFB_8	SAFB	115.65/136.58/225.37	35.589/95.795/55.563	136.58	55.563	-1.2824	4161.3	2137.4	1.7703	0.038341	0.96166	0.076682	0.49026	FALSE
CORO1A_7	CORO1A	102.09/153.24/54.724	132.65/31.932/34.001	102.09	34.001	-1.5585	2429.8	1578	1.77	0.038363	0.96164	0.076726	0.49028	FALSE
EXT1_13	EXT1	381.27/278.16/244.82	227.28/159.66/78.783	278.16	159.66	-0.79709	5871.8	4487	1.7693	0.038424	0.96158	0.076848	0.49035	FALSE
TAF2_5	TAF2	56.016/93.275/83.526	28.309/23.949/19.903	83.526	23.949	-1.7604	425.92	1280	1.768	0.038531	0.96147	0.077063	0.4913	FALSE
PDRG1_11	PDRG1	6.3244/56.632/66.964	12.133/27.37/0	56.632	12.133	-2.1337	1318.8	853.68	1.7672	0.038597	0.9614	0.077194	0.49157	FALSE
PTPMT1_4	PTPMT1	84.024/126.59/85.686	81.692/25.089/24.879	85.686	25.089	-1.7323	837.88	1314.6	1.7669	0.038624	0.96138	0.077248	0.49157	FALSE
GCFC2_4	GCFC2	236.71/138.25/210.97	355.08/98.076/108.64	210.97	108.64	-0.95115	2975.8	3363.3	1.7662	0.038682	0.96132	0.077365	0.4918	FALSE
PFDN2_2	PFDN2	18.07/44.972/43.923	0/7.9829/14.098	43.923	7.9829	-2.3222	334.74	655	1.7657	0.038722	0.96128	0.077444	0.4918	FALSE
ADAMTSL1_12	ADAMTSL1	154.5/158.24/51.843	67.942/72.987/48.099	154.5	67.942	-1.1734	5275.8	2430.5	1.7655	0.038743	0.96126	0.077487	0.4918	FALSE
INTS8_13	INTS8	10.842/53.3/35.282	0/5.7021/56.392	35.282	5.7021	-2.4366	460.99	521.28	1.7648	0.038798	0.9612	0.077596	0.49224	FALSE
PPP1CB_9	PPP1CB	97.576/91.61/46.803	28.309/27.37/54.733	91.61	28.309	-1.6598	1021.6	1409.5	1.7644	0.038834	0.96117	0.077667	0.49243	FALSE
TBX6_7	TBX6	149.08/44.972/92.886	21.03/45.617/29.025	92.886	29.025	-1.6447	2726.5	1429.9	1.7638	0.038885	0.96112	0.07777	0.49282	FALSE
WRB_2	WRB	87.638/121.59/46.803	48.53/26.23/16.586	87.638	26.23	-1.7027	1410.2	1345.8	1.763	0.038953	0.96105	0.077906	0.49332	FALSE
ANXA13_3	ANXA13	8.1314/76.619/86.406	10.515/43.336/20.732	76.619	20.732	-1.8366	2393.2	1169.9	1.7614	0.039084	0.96092	0.078167	0.49432	FALSE
SERPINB5_8	SERPINB5	181.6/151.57/69.845	76.031/66.144/39.806	151.57	66.144	-1.1842	3790.6	2382.5	1.7609	0.039131	0.96087	0.078261	0.49466	FALSE
NonTargeting_Human_0412	NonTargeting_Human_0412	262.01/271.5/324.74	139.12/155.1/210.64	271.5	155.1	-0.8038	1462.4	4375	1.7601	0.039199	0.9608	0.078399	0.49482	FALSE
SMNDC1_7	SMNDC1	29.815/119.93/79.925	4.853/67.285/22.391	79.925	22.391	-1.7906	2055.5	1222.6	1.7596	0.039242	0.96076	0.078483	0.49503	FALSE
DYRK1A_4	DYRK1A	91.252/144.91/81.365	28.309/14.825/45.611	91.252	28.309	-1.6542	1488.5	1403.7	1.7584	0.039339	0.96066	0.078678	0.49563	FALSE
LONP1_1	LONP1	4.5174/91.61/98.647	14.559/28.511/114.44	91.61	28.511	-1.6499	3817.3	1409.5	1.7582	0.039356	0.96064	0.078712	0.49563	FALSE
DHRSX_11	DHRSX	0/34.978/79.205	0/5.7021/24.879	34.978	5.7021	-2.4244	1589.8	516.6	1.7578	0.039391	0.96061	0.078782	0.49563	FALSE
PIGQ_5	PIGQ	333.39/381.43/195.85	253.97/198.43/204.01	333.39	204.01	-0.70585	10612	5419.5	1.7575	0.039416	0.96058	0.078831	0.49563	FALSE
METTL17_1	METTL17	143.65/114.93/72.005	0/42.196/112.78	114.93	42.196	-1.4243	1333.8	1785.4	1.757	0.039459	0.96054	0.078918	0.49563	FALSE
MLLT11_1	MLLT11	224.97/283.16/124.57	112.43/119.74/231.37	224.97	119.74	-0.90416	6733.1	3596.2	1.7556	0.039575	0.96042	0.07915	0.49642	FALSE
STX4_14	STX4	127.39/134.92/99.367	92.207/50.179/34.001	127.39	50.179	-1.3269	421.01	1987.7	1.7554	0.039596	0.9604	0.079193	0.49643	FALSE
NID1_7	NID1	237.62/126.59/147.61	50.957/63.864/177.47	147.61	63.864	-1.196	4271.6	2317.6	1.7515	0.039926	0.96007	0.079852	0.49851	FALSE
RBBP5_3	RBBP5	56.92/59.963/18.001	18.603/12.545/4.9757	56.92	12.545	-2.0963	761.95	858.21	1.7513	0.039946	0.96005	0.079893	0.49851	FALSE
DYRK1A_7	DYRK1A	266.53/94.941/149.77	94.634/39.915/65.514	149.77	65.514	-1.1806	8319.3	2353	1.748	0.040229	0.95977	0.080457	0.50075	FALSE
DHRSX_4	DHRSX	0/44.972/29.522	16.177/4.5617/2.4879	29.522	4.5617	-2.4563	555.13	432.89	1.747	0.040316	0.95968	0.080631	0.50116	FALSE
RPS8_9	RPS8	10.842/6.6625/8.6406	0/1.1404/21.562	8.6406	1.1404	-2.1712	4.3791	120.28	1.747	0.040323	0.95968	0.080646	0.50116	FALSE
DNAJC13_6	DNAJC13	47.885/66.625/141.13	101.91/3.4213/16.586	66.625	16.586	-1.9432	2951	1011.3	1.7455	0.040447	0.95955	0.080895	0.50194	FALSE
AKAP9_4	AKAP9	447.23/466.38/373.7	297.65/436.78/235.52	447.23	297.65	-0.58576	2886	7361.8	1.7433	0.040644	0.95936	0.081288	0.5031	FALSE
SAFB_9	SAFB	28.912/193.21/154.09	65.516/84.391/68.831	154.09	68.831	-1.1512	8600.2	2423.8	1.7413	0.040818	0.95918	0.081636	0.50395	FALSE
NCBP1_14	NCBP1	0/23.319/5.7604	0/9.1234/0	5.7604	0	-2.7571	170.74	78.83	1.7411	0.040836	0.95916	0.081672	0.50395	FALSE
POLR1B_4	POLR1B	0/36.644/5.7604	0/34.213/0	5.7604	0	-2.7571	493.49	78.83	1.7411	0.040836	0.95916	0.081672	0.50395	FALSE
DET1_13	DET1	23.491/0/41.043	3.2353/3.4213/4.9757	23.491	3.4213	-2.4697	429.94	341.13	1.7384	0.041068	0.95893	0.082136	0.50579	FALSE
MESDC2_12	MESDC2	161.72/386.43/275.06	159.34/169.92/117.76	275.06	159.34	-0.78383	12624	4434.8	1.7378	0.041119	0.95888	0.082237	0.50616	FALSE
NXF5_5	NXF5	127.39/63.294/24.482	15.368/47.898/6.6343	63.294	15.368	-1.9738	2807.4	958.63	1.7369	0.041201	0.9588	0.082401	0.50641	FALSE
SLC35A2_10	SLC35A2	58.727/164.9/91.446	29.118/21.668/110.3	91.446	29.118	-1.618	3232.9	1406.8	1.7369	0.041204	0.9588	0.082408	0.50641	FALSE
FZD6_13	FZD6	308.99/211.54/220.33	97.869/117.46/254.59	220.33	117.46	-0.90179	3968.8	3519	1.7352	0.041349	0.95865	0.082699	0.50746	FALSE
S100A10_15	S100A10	49.692/16.656/70.565	0/10.264/58.88	49.692	10.264	-2.1701	763.51	744.92	1.7349	0.041376	0.95862	0.082751	0.50746	FALSE
NonTargeting_Human_0587	NonTargeting_Human_0587	444.51/206.54/303.14	240.22/93.515/181.61	303.14	181.61	-0.73593	14659	4907.9	1.7348	0.041391	0.95861	0.082782	0.50746	FALSE
ZNHIT1_1	ZNHIT1	183.41/186.55/72.725	48.53/90.093/111.13	183.41	90.093	-1.0175	6130.3	2906.4	1.7345	0.041416	0.95858	0.082832	0.50751	FALSE
POLR2L_1	POLR2L	0/23.319/49.683	0/3.4213/24.049	23.319	3.4213	-2.4595	619.43	338.53	1.7336	0.041496	0.9585	0.082992	0.50798	FALSE
DENND4A_11	DENND4A	34.332/14.991/36.722	0.80884/93.515/5.805	34.332	5.805	-2.3763	189.91	506.66	1.7329	0.041558	0.95844	0.083117	0.50818	FALSE
hsa-mir-1908_5	hsa-mir-1908	130.1/171.56/144.01	62.28/79.829/53.904	144.01	62.28	-1.1963	476.23	2258.7	1.7327	0.041574	0.95843	0.083149	0.50818	FALSE
NonTargeting_Human_0705	NonTargeting_Human_0705	305.38/544.66/473.07	313.83/456.17/320.11	473.07	320.11	-0.56205	16623	7806	1.7313	0.041697	0.9583	0.083394	0.50878	FALSE
NonTargeting_Human_0671	NonTargeting_Human_0671	57.823/119.93/105.85	98.678/37.634/9.9515	105.85	37.634	-1.4676	1252.3	1638.5	1.7313	0.041703	0.9583	0.083406	0.50878	FALSE
NonTargeting_Human_0453	NonTargeting_Human_0453	103.9/114.93/54.004	33.971/36.493/116.93	103.9	36.493	-1.4843	1305.7	1607.2	1.7306	0.041764	0.95824	0.083529	0.50907	FALSE
CWC22_2	CWC22	74.086/61.628/24.482	0/14.825/56.392	61.628	14.825	-1.9846	767.54	932.35	1.7302	0.041795	0.95821	0.08359	0.50907	FALSE
CEP120_12	CEP120	23.491/76.619/66.964	87.354/17.106/10.781	66.964	17.106	-1.9083	991.59	1016.7	1.7298	0.041836	0.95816	0.083673	0.50907	FALSE
ATP5I_6	ATP5I	109.32/69.957/124.57	0/91.234/39.806	109.32	39.806	-1.4349	891.04	1694.7	1.7296	0.04185	0.95815	0.0837	0.50907	FALSE
NonTargeting_Human_0579	NonTargeting_Human_0579	207.8/136.58/168.49	76.031/239.49/79.612	168.49	79.612	-1.0721	1281.8	2660.4	1.729	0.041909	0.95809	0.083818	0.50946	FALSE
GALR1_1	GALR1	162.63/59.963/105.13	17.794/169.92/37.318	105.13	37.318	-1.4697	2673	1626.9	1.7281	0.041985	0.95802	0.083969	0.50962	FALSE
ATP5O_5	ATP5O	73.182/58.297/68.405	17.794/57.021/14.927	68.405	17.794	-1.8847	62.493	1039.5	1.7278	0.042014	0.95799	0.084029	0.50973	FALSE
GPN2_13	GPN2	64.147/59.963/68.405	55.81/15.966/3.3172	64.147	15.966	-1.9411	17.817	972.11	1.7263	0.042145	0.95786	0.084289	0.51054	FALSE
RNMT_12	RNMT	160.82/198.21/177.85	86.545/83.251/97.027	177.85	86.545	-1.0307	352.27	2814.7	1.7253	0.04224	0.95776	0.084481	0.51069	FALSE
VPS35_9	VPS35	130.1/101.6/58.324	33.971/35.353/46.44	101.6	35.353	-1.4969	1342.6	1570.1	1.7244	0.042315	0.95769	0.084629	0.51108	FALSE
NonTargeting_Human_0270	NonTargeting_Human_0270	280.08/253.18/280.82	170.66/164.22/160.05	280.08	164.22	-0.76659	362.19	4519.3	1.7236	0.042389	0.95761	0.084777	0.51125	FALSE
RPS8_12	RPS8	0.90349/41.641/26.642	1.6177/11.404/4.1465	26.642	4.1465	-2.4252	443.72	388.96	1.7236	0.042391	0.95761	0.084782	0.51125	FALSE
MTA2_4	MTA2	51.499/79.95/92.166	23.456/23.949/20.732	79.95	23.456	-1.7268	479.36	1223	1.7229	0.042457	0.95754	0.084914	0.51154	FALSE
INTS2_1	INTS2	60.534/123.26/110.89	97.869/41.055/26.537	110.89	41.055	-1.4117	1344.3	1720	1.7222	0.042518	0.95748	0.085035	0.51202	FALSE
NonTargeting_Human_0100	NonTargeting_Human_0100	58.727/126.59/123.85	49.339/156.24/34.001	123.85	49.339	-1.3104	2124.2	1930.1	1.7209	0.042638	0.95736	0.085276	0.51278	FALSE
PTPMT1_10	PTPMT1	220.45/178.22/136.09	109.19/70.706/87.076	178.22	87.076	-1.0249	1779.2	2820.8	1.7203	0.042689	0.95731	0.085377	0.51278	FALSE
EMC6_11	EMC6	321.64/158.24/88.566	72.795/66.144/109.47	158.24	72.795	-1.1096	15778	2491.8	1.7196	0.042755	0.95724	0.08551	0.51278	FALSE
CERS2_4	CERS2	54.209/163.23/116.65	36.398/155.1/44.782	116.65	44.782	-1.3616	3034.3	1813.2	1.7192	0.042787	0.95721	0.085575	0.51278	FALSE
XAGE1A_14	XAGE1A	168.95/171.56/158.41	16.177/160.8/80.441	168.95	80.441	-1.0613	58.961	2668	1.7192	0.042791	0.95721	0.085582	0.51278	FALSE
C21orf59_4	C21orf59	0/108.27/87.126	4.853/27.37/46.44	87.126	27.37	-1.6352	4018.9	1337.6	1.7179	0.04291	0.95709	0.085819	0.51294	FALSE
CBWD1_7	CBWD1	44.271/71.622/51.843	11.324/76.408/3.3172	51.843	11.324	-2.1003	224.27	778.58	1.7169	0.043001	0.957	0.086001	0.51349	FALSE
NonTargeting_Human_0315	NonTargeting_Human_0315	321.64/243.18/156.97	210.3/126.59/136	243.18	136	-0.83374	6794.1	3900.3	1.7167	0.043019	0.95698	0.086038	0.51349	FALSE
TAF1_8	TAF1	20.78/101.6/192.25	132.65/28.511/35.66	101.6	35.66	-1.4848	7374.8	1570.1	1.7159	0.043086	0.95691	0.086172	0.51404	FALSE
RTBDN_12	RTBDN	193.35/184.89/85.686	92.207/42.196/104.49	184.89	92.207	-0.9959	4956.1	2930.9	1.7152	0.043152	0.95685	0.086305	0.5142	FALSE
NonTargeting_Human_0012	NonTargeting_Human_0012	184.31/113.26/65.524	42.868/99.217/34.001	113.26	42.868	-1.3811	3663.4	1758.4	1.7137	0.043296	0.9567	0.086592	0.51483	FALSE
RANBP1_3	RANBP1	249.36/206.54/308.18	80.884/181.33/140.98	249.36	140.98	-0.81833	2646.7	4003.7	1.7133	0.043328	0.95667	0.086656	0.51483	FALSE
MTFP1_11	MTFP1	201.48/174.89/197.29	91.398/101.5/155.91	197.29	101.5	-0.95205	259.67	3136.2	1.7128	0.043376	0.95662	0.086751	0.51483	FALSE
COPS8_3	COPS8	130.1/308.14/169.21	53.383/80.97/150.93	169.21	80.97	-1.0542	10416	2672.3	1.7125	0.043404	0.9566	0.086808	0.51483	FALSE
CERS2_6	CERS2	120.16/236.52/252.02	107.58/131.15/178.3	236.52	131.15	-0.84589	6889.5	3789	1.7125	0.043405	0.9566	0.08681	0.51483	FALSE
TAF7_13	TAF7	164.43/69.957/179.29	177.13/77.549/37.318	164.43	77.549	-1.0746	4573.4	2593.7	1.7125	0.043405	0.95659	0.086811	0.51483	FALSE
ANKRD36_4	ANKRD36	54.209/36.644/32.402	4.853/49.038/6.6343	36.644	6.6343	-2.3018	163.26	542.27	1.7117	0.043473	0.95653	0.086946	0.51508	FALSE
TMEM199_13	TMEM199	133.72/94.941/54.724	100.3/31.932/16.586	94.941	31.932	-1.5427	1560.5	1462.9	1.7115	0.043497	0.9565	0.086993	0.51508	FALSE
SLC4A1AP_1	SLC4A1AP	215.03/183.22/131.77	248.31/54.74/91.222	183.22	91.222	-0.99824	1829.5	2903.3	1.7108	0.043555	0.95645	0.08711	0.51508	FALSE
SOCS1_4	SOCS1	93.059/271.5/227.54	110/135.71/124.39	227.54	124.39	-0.86595	10008	3639	1.7106	0.043575	0.95642	0.087151	0.51508	FALSE
DHRSX_2	DHRSX	29.815/44.972/47.523	76.031/9.1234/9.1222	44.972	9.1234	-2.1831	118.12	671.32	1.7088	0.043741	0.95626	0.087482	0.51586	FALSE
RAB10_10	RAB10	215.03/196.54/122.41	60.663/114.04/101.17	196.54	101.17	-0.95116	2919	3123.8	1.7086	0.04376	0.95624	0.087521	0.51586	FALSE
ANAPC16_5	ANAPC16	135.52/201.54/210.25	189.27/104.92/79.612	201.54	104.92	-0.93526	2217.2	3206.7	1.7082	0.043799	0.9562	0.087598	0.51586	FALSE
ERP44_13	ERP44	55.113/213.2/203.05	95.443/106.06/166.69	203.05	106.06	-0.93054	10995	3231.8	1.708	0.043817	0.95618	0.087634	0.51586	FALSE
GPN3_8	GPN3	30.718/91.61/84.966	5.6618/69.566/26.537	84.966	26.537	-1.6424	1493.4	1303.1	1.7073	0.043881	0.95612	0.087763	0.51586	FALSE
hsa-mir-6886_13	hsa-mir-6886	49.692/109.93/87.846	12.941/37.634/28.196	87.846	28.196	-1.6055	971.76	1349.1	1.7042	0.044173	0.95583	0.088347	0.51754	FALSE
EIF3F_13	EIF3F	30.718/78.285/49.683	4.0442/25.089/10.781	49.683	10.781	-2.1051	588.85	744.79	1.704	0.044186	0.95581	0.088372	0.51754	FALSE
DCPS_10	DCPS	106.61/163.23/241.22	42.868/294.23/77.124	163.23	77.124	-1.0719	4643.7	2573.9	1.7038	0.044206	0.95579	0.088413	0.51754	FALSE
S100A14_13	S100A14	196.06/218.2/241.94	46.912/148.25/117.76	218.2	117.76	-0.88419	526.88	3483.5	1.7029	0.044297	0.9557	0.088594	0.51786	FALSE
hsa-mir-1302-6_7	hsa-mir-1302-6	38.85/79.95/108.01	25.883/21.668/24.049	79.95	24.049	-1.6923	1238.2	1223	1.7024	0.044338	0.95566	0.088677	0.51792	FALSE
NonTargeting_Human_0880	NonTargeting_Human_0880	179.79/173.23/88.566	99.487/84.391/26.537	173.23	84.391	-1.0288	3605.2	2738.4	1.7023	0.044347	0.95565	0.088695	0.51792	FALSE
STK11_4	STK11	11.745/74.953/88.566	46.104/14.825/21.562	74.953	21.562	-1.7512	2090.3	1143.4	1.7014	0.044438	0.95556	0.088877	0.51792	FALSE
DNLZ_6	DNLZ	177.99/193.21/103.69	34.78/90.093/87.905	177.99	87.905	-1.0095	2876.2	2816.9	1.7013	0.044443	0.95556	0.088885	0.51792	FALSE
MED26_4	MED26	287.31/226.53/300.98	171.47/184.75/108.64	287.31	171.47	-0.74124	1940.7	4640.9	1.7005	0.044521	0.95548	0.089041	0.51842	FALSE
ITGA1_12	ITGA1	35.236/14.991/21.601	47.721/0/3.3172	21.601	3.3172	-2.3883	114.8	312.59	1.6999	0.044578	0.95542	0.089157	0.51842	FALSE
FRY_13	FRY	131.01/76.619/121.69	138.31/38.774/48.928	121.69	48.928	-1.2971	1059	1895	1.6971	0.044842	0.95516	0.089685	0.5205	FALSE
RANBP1_1	RANBP1	228.58/168.23/213.85	114.85/128.87/87.905	213.85	114.85	-0.89104	1149.3	3411.2	1.6963	0.044914	0.95509	0.089828	0.52082	FALSE
AMTN_7	AMTN	0/33.313/28.802	4.853/41.055/2.4879	28.802	4.853	-2.3482	424.95	421.89	1.6953	0.045012	0.95499	0.090024	0.52147	FALSE
NonTargeting_Human_0847	NonTargeting_Human_0847	318.03/223.19/207.37	167.43/122.03/110.3	223.19	122.03	-0.8658	4621.7	3566.7	1.695	0.045042	0.95496	0.090083	0.52157	FALSE
SREBF2_8	SREBF2	133.72/139.91/122.41	100.3/57.021/48.099	133.72	57.021	-1.2153	83.136	2090.7	1.6945	0.045089	0.95491	0.090178	0.52168	FALSE
ANKRD35_2	ANKRD35	85.831/193.21/210.25	99.487/61.583/157.57	193.21	99.487	-0.95064	5910.7	3068.6	1.6944	0.045094	0.95491	0.090189	0.52168	FALSE
CTDP1_1	CTDP1	65.051/39.975/92.886	71.986/17.106/6.6343	65.051	17.106	-1.8671	701.8	986.38	1.694	0.045131	0.95487	0.090262	0.52186	FALSE
THOC6_7	THOC6	291.83/298.15/136.09	175.52/126.59/257.08	291.83	175.52	-0.73023	12147	4717	1.6936	0.045173	0.95483	0.090346	0.52198	FALSE
CHD7_5	CHD7	152.69/226.53/210.97	296.84/112.9/89.563	210.97	112.9	-0.8961	1819.5	3363.3	1.6925	0.04528	0.95472	0.090559	0.52237	FALSE
WRB_11	WRB	92.155/91.61/62.644	11.324/45.617/30.684	91.61	30.684	-1.5474	419.65	1409.5	1.6922	0.045304	0.9547	0.090607	0.52237	FALSE
MPDU1_10	MPDU1	210.51/153.24/82.085	160.15/70.706/64.685	153.24	70.706	-1.105	4171.5	2409.8	1.6901	0.0455	0.9545	0.091	0.52439	FALSE
PPIL2_2	PPIL2	30.718/61.628/48.963	71.178/2.2808/10.781	48.963	10.781	-2.0844	246.64	733.54	1.6891	0.045596	0.9544	0.091192	0.5245	FALSE
ASH2L_6	ASH2L	91.252/18.322/48.963	1.6177/91.234/10.781	48.963	10.781	-2.0844	1363.6	733.54	1.6891	0.045596	0.9544	0.091192	0.5245	FALSE
PRMT1_5	PRMT1	33.429/56.632/76.325	4.853/13.685/42.294	56.632	13.685	-1.9725	463.1	853.68	1.688	0.045704	0.9543	0.091407	0.52525	FALSE
KLHL20_14	KLHL20	259.3/133.25/129.61	19.412/57.021/57.221	133.25	57.021	-1.2103	7950.9	2083.1	1.6874	0.045766	0.95423	0.091533	0.52572	FALSE
SCAP_14	SCAP	57.823/253.18/204.49	110.81/108.34/69.66	204.49	108.34	-0.91027	11941	3255.7	1.6869	0.045816	0.95418	0.091631	0.52595	FALSE
NonTargeting_Human_0472	NonTargeting_Human_0472	180.7/158.24/95.766	74.413/107.2/37.318	158.24	74.413	-1.0783	2203.4	2491.8	1.6867	0.045829	0.95417	0.091659	0.52595	FALSE
MLLT1_4	MLLT1	265.62/199.88/122.41	74.413/104.92/229.71	199.88	104.92	-0.92335	5162.1	3179	1.6861	0.045889	0.95411	0.091779	0.52614	FALSE
DNAJC4_12	DNAJC4	196.96/184.89/83.526	93.825/163.08/14.098	184.89	93.825	-0.97107	5209.8	2930.9	1.6852	0.045978	0.95402	0.091956	0.52691	FALSE
POLR3C_7	POLR3C	0/4.9969/15.841	0/0/0	4.9969	0	-2.5842	71.282	67.973	1.6846	0.046037	0.95396	0.092075	0.52708	FALSE
MCM3_2	MCM3	0/4.9969/22.321	0/14.825/0	4.9969	0	-2.5842	162.56	67.973	1.6846	0.046037	0.95396	0.092075	0.52708	FALSE
GPN1_4	GPN1	202.38/169.89/198.01	105.96/103.78/78.783	198.01	103.78	-0.92552	404.87	3148.2	1.6816	0.046327	0.95367	0.092655	0.52872	FALSE
CDC23_1	CDC23	22.587/56.632/28.802	0/19.387/4.9757	28.802	4.9757	-2.3182	406.56	421.89	1.6815	0.04633	0.95367	0.092661	0.52872	FALSE
GTF2H2_14	GTF2H2	20.78/148.24/76.325	3.2353/22.808/58.88	76.325	22.808	-1.6995	4128.6	1165.2	1.681	0.046377	0.95362	0.092754	0.52882	FALSE
PROX1_3	PROX1	131.01/156.57/89.286	55.81/65.004/53.904	131.01	55.81	-1.2164	1197	2046.5	1.6805	0.046432	0.95357	0.092864	0.52882	FALSE
GTPBP5_4	GTPBP5	262.91/84.947/141.13	101.1/62.723/25.708	141.13	62.723	-1.1573	8994	2211.6	1.6803	0.046452	0.95355	0.092904	0.52882	FALSE
PPIAL4A_8	PPIAL4A	53.306/19.988/73.445	16.986/12.545/4.9757	53.306	12.545	-2.0034	757.84	801.48	1.6798	0.046495	0.95351	0.09299	0.52882	FALSE
BTF3_12	BTF3	248.46/243.18/210.97	138.31/125.45/167.52	243.18	138.31	-0.80965	532.61	3900.3	1.6797	0.046507	0.95349	0.093015	0.52882	FALSE
CDC73_13	CDC73	198.77/66.625/153.37	86.545/37.634/71.319	153.37	71.319	-1.0939	4792.8	2412	1.6794	0.046537	0.95346	0.093075	0.52882	FALSE
ARPC3_7	ARPC3	17.166/0/10.801	1.6177/45.617/0	10.801	1.6177	-2.1725	78.588	151.78	1.6792	0.046552	0.95345	0.093105	0.52882	FALSE
PPIAL4A_4	PPIAL4A	0.90349/64.96/80.645	77.648/17.106/17.415	64.96	17.415	-1.8407	2174.6	984.94	1.6792	0.046556	0.95344	0.093112	0.52882	FALSE
CDC14A_3	CDC14A	51.499/24.984/15.841	0/33.072/4.1465	24.984	4.1465	-2.336	393.3	363.78	1.6785	0.046624	0.95338	0.093248	0.52884	FALSE
PQBP1_8	PQBP1	118.36/219.86/169.93	80.884/83.251/173.32	169.93	83.251	-1.0207	2576.6	2684.1	1.6781	0.04666	0.95334	0.09332	0.52884	FALSE
MGEA5_9	MGEA5	187.92/116.59/51.123	33.971/52.459/46.44	116.59	46.44	-1.3096	4687.2	1812.4	1.6772	0.046748	0.95325	0.093495	0.52884	FALSE
STOML3_6	STOML3	206.9/94.941/142.57	45.295/63.864/152.59	142.57	63.864	-1.1463	3203.3	2235.2	1.6771	0.046758	0.95324	0.093516	0.52884	FALSE
MED8_5	MED8	64.147/64.96/48.963	14.559/17.106/38.147	64.147	17.106	-1.8472	115.61	972.11	1.6769	0.046784	0.95322	0.093568	0.52884	FALSE
TAF10_12	TAF10	17.166/138.25/68.405	45.295/0/19.074	68.405	19.074	-1.7897	3751.7	1039.5	1.6761	0.046859	0.95314	0.093719	0.52884	FALSE
RPUSD4_11	RPUSD4	112.94/71.622/110.89	42.868/36.493/52.245	110.89	42.868	-1.3508	772.97	1720	1.6755	0.046918	0.95308	0.093836	0.52884	FALSE
TAF1_3	TAF1	0/113.26/87.846	29.118/50.179/0	87.846	29.118	-1.5607	4181.5	1349.1	1.6754	0.046931	0.95307	0.093862	0.52884	FALSE
PFDN2_5	PFDN2	460.78/293.15/184.33	156.11/177.91/233.03	293.15	177.91	-0.71736	19970	4739.4	1.6741	0.047052	0.95295	0.094104	0.52884	FALSE
DOCK5_4	DOCK5	182.5/214.87/290.9	147.21/76.408/116.93	214.87	116.93	-0.87221	3414.2	3428	1.6739	0.047076	0.95292	0.094151	0.52884	FALSE
EIF2B4_2	EIF2B4	0/4.9969/12.961	0/9.1234/0.82929	4.9969	0.82929	-1.7129	44.197	67.973	1.6723	0.047234	0.95277	0.094467	0.52884	FALSE
PTPMT1_1	PTPMT1	154.5/204.87/224.65	65.516/109.48/157.57	204.87	109.48	-0.89796	1464.6	3262	1.6718	0.047278	0.95272	0.094556	0.52884	FALSE
TBX6_3	TBX6	85.831/198.21/247.7	62.28/241.77/104.49	198.21	104.49	-0.91718	7539	3151.4	1.6715	0.047315	0.95268	0.094631	0.52884	FALSE
ZW10_13	ZW10	15.359/46.638/72.005	5.6618/10.264/196.54	46.638	10.264	-2.0804	810.92	697.26	1.6713	0.047328	0.95267	0.094656	0.52884	FALSE
CACNA1A_4	CACNA1A	126.49/86.613/123.13	50.957/23.949/97.856	123.13	50.957	-1.2565	672.33	1918.4	1.6711	0.047348	0.95265	0.094695	0.52884	FALSE
SETD1A_13	SETD1A	216.84/223.19/181.45	300.08/118.6/73.807	216.84	118.6	-0.86498	646.24	3460.8	1.6709	0.04737	0.95263	0.094739	0.52884	FALSE
C21orf59_13	C21orf59	135.52/86.613/139.69	39.633/59.302/89.563	135.52	59.302	-1.1789	1204.8	2120.1	1.6708	0.047378	0.95262	0.094757	0.52884	FALSE
GIGYF2_10	GIGYF2	123.78/168.23/89.286	87.354/39.915/51.416	123.78	51.416	-1.2513	1582.8	1928.9	1.6704	0.047418	0.95258	0.094837	0.52884	FALSE
CDC23_13	CDC23	174.37/43.306/105.85	42.059/39.915/16.586	105.85	39.915	-1.3849	4303.5	1638.5	1.6703	0.047426	0.95257	0.094852	0.52884	FALSE
C10orf53_9	C10orf53	362.3/126.59/293.78	178.75/281.68/127.71	293.78	178.75	-0.71362	16324	4750	1.6691	0.04755	0.95245	0.0951	0.52884	FALSE
hsa-mir-1908_14	hsa-mir-1908	187.92/143.24/90.006	64.707/57.021/136	143.24	64.707	-1.1344	2415.3	2246.2	1.669	0.047554	0.95245	0.095108	0.52884	FALSE
MED8_6	MED8	31.622/69.957/66.244	13.75/18.247/104.49	66.244	18.247	-1.8048	606.25	1005.3	1.6689	0.047567	0.95243	0.095133	0.52884	FALSE
TMEM134_13	TMEM134	151.79/98.272/122.41	46.104/66.144/50.587	122.41	50.587	-1.2584	722.78	1906.7	1.6686	0.047596	0.9524	0.095192	0.52884	FALSE
WRNIP1_1	WRNIP1	7.2279/6.6625/17.281	0.80884/1.1404/43.123	7.2279	1.1404	-1.9426	50.694	99.863	1.6682	0.047639	0.95236	0.095277	0.52905	FALSE
EXOC1_8	EXOC1	60.534/103.27/72.005	21.03/11.404/21.562	72.005	21.03	-1.7285	554.53	1096.5	1.6673	0.047729	0.95227	0.095457	0.52958	FALSE
CSNK1A1_9	CSNK1A1	159.01/301.48/277.22	165.81/80.97/247.13	277.22	165.81	-0.738	7280.5	4471.1	1.6663	0.047829	0.95217	0.095658	0.52958	FALSE
GTF2A2_9	GTF2A2	149.98/151.57/136.81	69.56/58.161/103.66	149.98	69.56	-1.0974	87.988	2356.4	1.6662	0.047841	0.95216	0.095682	0.52958	FALSE
RABIF_2	RABIF	56.92/171.56/170.65	198.16/84.391/42.294	170.65	84.391	-1.0073	6467.9	2696	1.6661	0.047843	0.95216	0.095686	0.52958	FALSE
EHD2_9	EHD2	301.76/223.19/149.77	123.75/132.29/83.758	223.19	123.75	-0.84569	5782.2	3566.7	1.666	0.047857	0.95214	0.095714	0.52958	FALSE
EXOC4_6	EXOC4	84.024/28.316/60.484	12.133/42.196/15.757	60.484	15.757	-1.8755	794.47	914.3	1.6656	0.047897	0.9521	0.095795	0.52958	FALSE
DYNLL1_5	DYNLL1	272.85/116.59/59.764	46.912/75.268/45.611	116.59	46.912	-1.2953	13823	1812.4	1.6656	0.0479	0.9521	0.095799	0.52958	FALSE
ROR1_15	ROR1	73.182/99.938/22.321	19.412/21.668/68.002	73.182	21.668	-1.7104	1651.3	1115.3	1.6652	0.047938	0.95206	0.095877	0.52958	FALSE
DAP3_10	DAP3	50.595/99.938/102.97	87.354/36.493/34.83	99.938	36.493	-1.4288	1221.9	1543.3	1.6652	0.047939	0.95206	0.095878	0.52958	FALSE
RUVBL1_8	RUVBL1	51.499/54.966/27.362	12.133/28.511/3.3172	51.499	12.133	-1.9991	297.3	773.18	1.665	0.047953	0.95205	0.095906	0.52958	FALSE
MARS2_8	MARS2	131.01/94.941/120.25	49.339/54.74/31.513	120.25	49.339	-1.2682	378.08	1871.6	1.6645	0.04801	0.95199	0.096019	0.52958	FALSE
FAM21A_11	FAM21A	285.5/268.17/299.54	296.03/144.83/172.49	285.5	172.49	-0.72367	248.78	4610.5	1.6645	0.048011	0.95199	0.096022	0.52958	FALSE
MARS2_14	MARS2	96.673/54.966/73.445	21.839/10.264/29.025	73.445	21.839	-1.7047	440.51	1119.4	1.6637	0.048085	0.95192	0.09617	0.53015	FALSE
RPL28_14	RPL28	178.89/103.27/131.05	56.618/134.57/49.757	131.05	56.618	-1.1965	1530.2	2047.2	1.6627	0.048187	0.95181	0.096374	0.53056	FALSE
STK11_5	STK11	549.32/456.38/487.47	438.39/288.53/338.35	487.47	338.35	-0.5255	2395.8	8053.9	1.6616	0.048293	0.95171	0.096585	0.53146	FALSE
NSFL1C_6	NSFL1C	71.375/24.984/55.444	13.75/65.004/9.1222	55.444	13.75	-1.9361	590.79	835.02	1.6611	0.04835	0.95165	0.0967	0.53146	FALSE
PROX1_13	PROX1	76.796/134.92/123.13	62.28/43.336/51.416	123.13	51.416	-1.2438	1142.8	1918.4	1.6602	0.048436	0.95156	0.096873	0.53172	FALSE
MRPL9_4	MRPL9	19.877/88.279/89.286	29.927/22.808/31.513	88.279	29.927	-1.5295	2339.9	1356.1	1.6578	0.048675	0.95133	0.09735	0.53352	FALSE
ATP5F1_9	ATP5F1	98.48/131.59/146.89	36.398/88.953/57.221	131.59	57.221	-1.1873	665.09	2055.9	1.6573	0.048734	0.95127	0.097468	0.53358	FALSE
PROX1_9	PROX1	0/83.282/49.683	18.603/3.4213/11.61	49.683	11.61	-2.0069	1798.6	744.79	1.6563	0.04883	0.95117	0.097661	0.53405	FALSE
ATP11A_2	ATP11A	56.016/36.644/54.004	2.4265/27.37/13.269	54.004	13.269	-1.9467	152.7	812.42	1.6563	0.048832	0.95117	0.097665	0.53405	FALSE
DPAGT1_10	DPAGT1	85.831/126.59/131.77	28.309/70.706/53.904	126.59	53.904	-1.2165	843.99	1974.6	1.656	0.048865	0.95113	0.097731	0.53417	FALSE
TMEM30B_13	TMEM30B	142.75/131.59/187.93	92.207/65.004/43.123	142.75	65.004	-1.1229	1083	2238.1	1.6552	0.04894	0.95106	0.09788	0.5343	FALSE
AQP10_4	AQP10	84.928/163.23/150.49	45.295/90.093/70.49	150.49	70.49	-1.0834	2230.4	2364.8	1.6543	0.049037	0.95096	0.098073	0.53485	FALSE
FZR1_4	FZR1	103.9/109.93/120.25	34.78/117.46/43.123	109.93	43.123	-1.3301	71.398	1704.5	1.6534	0.049125	0.95088	0.09825	0.53534	FALSE
SMOC1_14	SMOC1	162.63/91.61/208.09	79.266/75.268/104.49	162.63	79.266	-1.0276	3555.3	2564	1.6524	0.049224	0.95078	0.098448	0.5355	FALSE
OR52B2_1	OR52B2	360.49/163.23/292.34	178.75/179.05/106.15	292.34	178.75	-0.70656	10657	4725.7	1.6524	0.049224	0.95078	0.098448	0.5355	FALSE
ANO8_5	ANO8	315.32/204.87/181.45	335.67/110.62/107.81	204.87	110.62	-0.88315	6373.2	3262	1.6518	0.049286	0.95071	0.098572	0.5355	FALSE
YPEL1_1	YPEL1	117.45/169.89/174.97	248.31/62.723/84.588	169.89	84.588	-0.99763	1387.9	2683.5	1.6516	0.04931	0.95069	0.09862	0.5355	FALSE
UHRF2_12	UHRF2	24.394/54.966/105.85	13.75/86.672/1.6586	54.966	13.75	-1.9238	1761.8	827.52	1.6514	0.049327	0.95067	0.098654	0.5355	FALSE
CSNK2A2_15	CSNK2A2	132.81/248.18/258.5	143.97/80.97/191.57	248.18	143.97	-0.7814	6708	3983.9	1.6514	0.049332	0.95067	0.098664	0.5355	FALSE
HAVCR1_11	HAVCR1	249.36/186.55/110.17	88.972/96.936/121.08	186.55	96.936	-0.93737	4889.8	2958.4	1.6504	0.04943	0.95057	0.09886	0.53602	FALSE
INTS12_10	INTS12	75.893/96.607/60.484	23.456/10.264/41.465	75.893	23.456	-1.6526	333.25	1158.3	1.6502	0.049455	0.95054	0.098911	0.53606	FALSE
GYG2_2	GYG2	115.65/109.93/105.85	43.677/43.336/43.123	109.93	43.336	-1.3231	24.669	1704.5	1.6479	0.049685	0.95032	0.099369	0.53726	FALSE
LSM7_11	LSM7	64.147/88.279/39.603	17.794/7.9829/96.198	64.147	17.794	-1.7934	592.38	972.11	1.6477	0.04971	0.95029	0.099421	0.53726	FALSE
C9orf41_7	C9orf41	252.07/216.53/174.25	257.21/119.74/44.782	216.53	119.74	-0.84928	1525.4	3455.7	1.6475	0.049725	0.95027	0.09945	0.53726	FALSE
CDC73_7	CDC73	3.6139/104.93/72.005	8.0884/114.04/21.562	72.005	21.562	-1.6941	2880.8	1096.5	1.6474	0.049742	0.95026	0.099485	0.53726	FALSE
PIK3C3_14	PIK3C3	327.97/276.5/172.81	166.62/444.76/111.13	276.5	166.62	-0.72727	6699.7	4458.9	1.6456	0.049923	0.95008	0.099846	0.5385	FALSE
SSX4_1	SSX4	52.402/51.635/35.282	55.81/12.545/4.9757	51.635	12.545	-1.9583	133.99	775.31	1.6456	0.049927	0.95007	0.099854	0.5385	FALSE
RNF151_10	RNF151	246.65/274.83/143.29	143.16/246.33/139.32	246.65	143.16	-0.7806	5738.8	3958.3	1.6453	0.049956	0.95004	0.099913	0.5385	FALSE
NFRKB_5	NFRKB	175.28/151.57/201.61	142.36/88.953/54.733	175.28	88.953	-0.9706	627.75	2772.2	1.6435	0.05014	0.94986	0.10028	0.54012	FALSE
GTF2H2_7	GTF2H2	236.71/153.24/118.81	55.81/72.987/111.13	153.24	72.987	-1.0598	4076.8	2409.8	1.643	0.050194	0.94981	0.10039	0.54022	FALSE
EXOC8_4	EXOC8	129.2/273.16/187.21	79.266/168.78/97.856	187.21	97.856	-0.92896	5376.6	2969.3	1.6425	0.050241	0.94976	0.10048	0.5405	FALSE
MBTPS1_12	MBTPS1	1.807/266.5/102.25	65.516/38.774/20.732	102.25	38.774	-1.3762	18534	1580.5	1.6412	0.050378	0.94962	0.10076	0.54098	FALSE
ARL8A_11	ARL8A	121.07/181.55/163.45	85.737/57.021/80.441	163.45	80.441	-1.0138	1062.1	2577.5	1.6409	0.050411	0.94959	0.10082	0.54098	FALSE
CHMP1A_13	CHMP1A	91.252/9.9938/90.006	82.501/30.791/31.513	90.006	31.513	-1.4849	3201.8	1383.7	1.6396	0.050548	0.94945	0.1011	0.54161	FALSE
PIP5K1A_15	PIP5K1A	177.99/136.58/70.565	61.472/50.179/140.15	136.58	61.472	-1.139	3036.3	2137.4	1.6388	0.050632	0.94937	0.10126	0.54183	FALSE
CDC73_1	CDC73	56.92/91.61/23.762	0/14.825/33.172	56.92	14.825	-1.8718	1151.4	858.21	1.6383	0.050682	0.94932	0.10136	0.54211	FALSE
COPS2_7	COPS2	240.33/174.89/108.73	88.972/112.9/54.733	174.89	88.972	-0.96714	4329.8	2765.9	1.6377	0.050741	0.94926	0.10148	0.54211	FALSE
MED9_9	MED9	462.58/321.47/319.7	164.19/222.38/203.18	321.47	203.18	-0.65934	9958.6	5217.6	1.6377	0.050746	0.94925	0.10149	0.54211	FALSE
RBM14_11	RBM14	164.43/124.92/37.442	43.677/53.6/92.051	124.92	53.6	-1.2056	4607	1947.5	1.6369	0.050825	0.94917	0.10165	0.54271	FALSE
DAP3_2	DAP3	89.445/76.619/69.125	24.265/23.949/82.929	76.619	24.265	-1.6193	110.34	1169.9	1.635	0.051025	0.94897	0.10205	0.5439	FALSE
PIAS1_7	PIAS1	41.56/189.88/205.21	100.3/204.14/69.66	189.88	100.3	-0.91411	11117	3013.5	1.6344	0.051088	0.94891	0.10218	0.54419	FALSE
EXOC7_1	EXOC7	56.016/113.26/110.89	44.486/28.511/46.44	110.89	44.486	-1.2986	1508.3	1720	1.6341	0.05112	0.94888	0.10224	0.54419	FALSE
GREB1L_3	GREB1L	79.507/134.92/166.33	123.75/34.213/60.538	134.92	60.538	-1.1432	2028.6	2110.2	1.6339	0.051138	0.94886	0.10228	0.54419	FALSE
SEC13_13	SEC13	121.97/143.24/69.125	51.765/36.493/58.88	121.97	51.765	-1.2206	1622.6	1899.6	1.6336	0.051177	0.94882	0.10235	0.54419	FALSE
NonTargeting_Human_0617	NonTargeting_Human_0617	326.16/353.11/197.29	312.21/171.06/207.32	326.16	207.32	-0.65117	8666.4	5297.1	1.6328	0.051254	0.94875	0.10251	0.54419	FALSE
VPS35_6	VPS35	59.63/0/19.441	0/3.4213/3.3172	19.441	3.3172	-2.2433	996.55	280.08	1.6327	0.051262	0.94874	0.10252	0.54419	FALSE
CPSF4_12	CPSF4	18.973/0/10.081	0/5.7021/1.6586	10.081	1.6586	-2.0593	90.348	141.25	1.6327	0.051269	0.94873	0.10254	0.54419	FALSE
HNRNPU_3	HNRNPU	11.745/189.88/126.73	55.001/104.92/38.977	126.73	55.001	-1.1896	8604.8	1976.9	1.6326	0.051275	0.94872	0.10255	0.54419	FALSE
CERS2_7	CERS2	257.49/114.93/163.45	56.618/80.97/101.17	163.45	80.97	-1.0045	5599.2	2577.5	1.6304	0.051512	0.94849	0.10302	0.54487	FALSE
TMEM30B_12	TMEM30B	205.99/119.93/63.364	88.972/49.038/50.587	119.93	50.587	-1.229	5303.5	1866.4	1.6292	0.051636	0.94836	0.10327	0.54556	FALSE
MORC2_4	MORC2	328.87/164.9/143.29	110/53.6/82.1	164.9	82.1	-0.99738	13677	2601.3	1.6289	0.051672	0.94833	0.10334	0.54556	FALSE
PPIAL4A_1	PPIAL4A	126.49/56.632/64.084	13.75/18.247/85.417	64.084	18.247	-1.7577	1974.9	971.11	1.6275	0.051817	0.94818	0.10363	0.54617	FALSE
MED27_5	MED27	0/13.325/4.3203	0/7.9829/0	4.3203	0	-2.4115	49.875	58.41	1.6273	0.051837	0.94816	0.10367	0.54617	FALSE
ITGA1_8	ITGA1	77.7/39.975/99.367	19.412/25.089/52.245	77.7	25.089	-1.5929	946.3	1187.1	1.6262	0.05195	0.94805	0.1039	0.54617	FALSE
ZG16B_12	ZG16B	156.3/199.88/195.85	101.1/117.46/105.32	195.85	105.32	-0.88871	790.2	3112.4	1.6248	0.052105	0.94789	0.10421	0.54752	FALSE
MED12_10	MED12	83.121/144.91/119.53	168.24/21.668/50.587	119.53	50.587	-1.2243	984.87	1859.9	1.6228	0.052315	0.94769	0.10463	0.54837	FALSE
YME1L1_7	YME1L1	106.61/113.26/71.285	35.589/42.196/61.368	106.61	42.196	-1.3169	646.1	1650.9	1.6228	0.052321	0.94768	0.10464	0.54837	FALSE
POLR2C_15	POLR2C	137.33/94.941/100.09	29.118/125.45/38.147	100.09	38.147	-1.3686	706.76	1545.7	1.6219	0.05241	0.94759	0.10482	0.54889	FALSE
PKD1_13	PKD1	64.147/136.58/118.81	50.148/102.64/36.489	118.81	50.148	-1.228	1651.8	1848.2	1.6219	0.052416	0.94758	0.10483	0.54889	FALSE
TMEM165_2	TMEM165	312.61/234.85/265.7	232.14/159.66/108.64	265.7	159.66	-0.7312	1575.8	4277.5	1.6215	0.052452	0.94755	0.1049	0.54904	FALSE
TMEM30B_14	TMEM30B	269.24/193.21/285.14	258.83/141.41/162.54	269.24	162.54	-0.72458	3016.3	4337	1.6204	0.052578	0.94742	0.10516	0.54967	FALSE
ZBTB8OS_3	ZBTB8OS	16.263/44.972/114.49	10.515/3.4213/53.075	44.972	10.515	-1.9973	2828.3	671.32	1.6197	0.052645	0.94736	0.10529	0.54987	FALSE
EXOC8_8	EXOC8	226.77/161.57/299.54	129.41/185.89/53.904	226.77	129.41	-0.80451	4773.4	3626.3	1.6175	0.052884	0.94712	0.10577	0.55143	FALSE
SREBF2_4	SREBF2	202.38/344.79/300.98	192.5/188.17/126.88	300.98	188.17	-0.67477	5820.4	4871.4	1.6164	0.053007	0.94699	0.10601	0.55248	FALSE
ASB16_12	ASB16	161.72/111.6/157.69	101.1/77.549/67.173	157.69	77.549	-1.0146	1070.4	2482.9	1.6151	0.053144	0.94686	0.10629	0.55364	FALSE
NSUN3_1	NSUN3	137.33/181.55/50.403	63.089/141.41/48.928	137.33	63.089	-1.11	4756	2149.6	1.6145	0.053213	0.94679	0.10643	0.55364	FALSE
EIF6_1	EIF6	40.657/41.641/22.321	14.559/9.1234/4.1465	40.657	9.1234	-2.0409	168.58	604.31	1.6134	0.053331	0.94667	0.10666	0.55396	FALSE
ZNF646_3	ZNF646	191.54/98.272/131.77	66.325/59.302/29.854	131.77	59.302	-1.1386	2347.2	2058.9	1.6129	0.053383	0.94662	0.10677	0.55398	FALSE
NonTargeting_Human_0171	NonTargeting_Human_0171	269.24/248.18/168.49	146.4/210.98/91.222	248.18	146.4	-0.75746	3396.8	3983.9	1.6129	0.053383	0.94662	0.10677	0.55398	FALSE
MED9_5	MED9	198.77/168.23/96.486	50.148/131.15/85.417	168.23	85.417	-0.96959	3039.8	2656.1	1.6116	0.053527	0.94647	0.10705	0.55429	FALSE
PIAS1_1	PIAS1	81.314/138.25/161.29	47.721/63.864/136	138.25	63.864	-1.1022	1886.2	2164.6	1.6115	0.053531	0.94647	0.10706	0.55429	FALSE
GTF3C4_3	GTF3C4	60.534/64.96/101.53	0/45.617/19.074	64.96	19.074	-1.7163	678.37	984.94	1.6104	0.053657	0.94634	0.10731	0.55429	FALSE
RALGAPA2_11	RALGAPA2	256.59/133.25/50.403	77.648/60.442/59.709	133.25	60.442	-1.1276	11038	2083.1	1.6103	0.05367	0.94633	0.10734	0.55429	FALSE
HTRA2_12	HTRA2	138.23/131.59/118.81	67.942/59.302/54.733	131.59	59.302	-1.1366	103.73	2055.9	1.61	0.053696	0.9463	0.10739	0.55429	FALSE
DDX4_15	DDX4	99.383/74.953/106.57	169.05/37.634/38.147	99.383	38.147	-1.3585	324.21	1534.4	1.61	0.053704	0.9463	0.10741	0.55429	FALSE
hsa-mir-6508_8	hsa-mir-6508	201.48/103.27/71.285	25.883/136.85/40.635	103.27	40.635	-1.3244	5333.9	1597	1.6082	0.053901	0.9461	0.1078	0.55562	FALSE
ATP6V1B1_14	ATP6V1B1	331.58/228.19/145.45	69.56/131.15/164.2	228.19	131.15	-0.7944	8767.6	3650	1.607	0.054031	0.94597	0.10806	0.5565	FALSE
EHD2_6	EHD2	205.99/253.18/170.65	114.05/100.36/182.44	205.99	114.05	-0.84738	1737.6	3280.6	1.6067	0.054055	0.94594	0.10811	0.5565	FALSE
EFCAB5_8	EFCAB5	209.61/193.21/96.486	104.34/57.021/244.64	193.21	104.34	-0.88259	4812.5	3068.6	1.6064	0.054088	0.94591	0.10818	0.5565	FALSE
NELFB_12	NELFB	126.49/63.294/82.805	15.368/28.511/42.294	82.805	28.511	-1.5058	1144.4	1268.5	1.6054	0.054207	0.94579	0.10841	0.55737	FALSE
HSD17B10_5	HSD17B10	172.57/144.91/185.05	35.589/88.953/98.686	172.57	88.953	-0.94824	460.37	2727.5	1.6051	0.05424	0.94576	0.10848	0.55747	FALSE
NFRKB_11	NFRKB	159.92/69.957/111.61	46.104/149.4/10.781	111.61	46.104	-1.2574	2034.3	1731.6	1.6048	0.054269	0.94573	0.10854	0.55753	FALSE
WWP1_1	WWP1	84.024/74.953/55.444	24.265/30.791/24.049	74.953	24.265	-1.588	231.45	1143.4	1.6042	0.054333	0.94567	0.10867	0.55796	FALSE
ATP13A1_3	ATP13A1	169.86/213.2/192.25	97.06/103.78/107.81	192.25	103.78	-0.88315	470.24	3052.7	1.6035	0.054418	0.94558	0.10884	0.55832	FALSE
ATP5I_2	ATP5I	15.359/98.272/92.166	19.412/41.055/34.001	92.166	34.001	-1.4124	2968.3	1418.4	1.6033	0.054437	0.94556	0.10887	0.55832	FALSE
PRPF6_12	PRPF6	0/46.638/122.41	2.4265/11.404/38.147	46.638	11.404	-1.9413	3958.1	697.26	1.6029	0.054476	0.94552	0.10895	0.55845	FALSE
KMT2D_6	KMT2D	190.64/251.51/123.85	84.928/102.64/109.47	190.64	102.64	-0.88681	4083.2	3026	1.602	0.054582	0.94542	0.10916	0.55865	FALSE
HNRNPU_5	HNRNPU	34.332/29.981/38.163	7.2795/5.7021/73.807	34.332	7.2795	-2.0934	16.801	506.66	1.602	0.054583	0.94542	0.10917	0.55865	FALSE
SYS1_10	SYS1	316.22/99.938/225.37	129.41/160.8/116.1	225.37	129.41	-0.79562	11994	3603	1.5994	0.054863	0.94514	0.10973	0.56057	FALSE
SETD1A_14	SETD1A	79.507/84.947/98.647	29.927/21.668/107.81	84.947	29.927	-1.4746	108.63	1302.8	1.5989	0.054921	0.94508	0.10984	0.56092	FALSE
MBOAT7_7	MBOAT7	0/54.966/61.924	4.0442/14.825/30.684	54.966	14.825	-1.8223	1534.8	827.52	1.5984	0.054973	0.94503	0.10995	0.56122	FALSE
TRAPPC1_14	TRAPPC1	209.61/121.59/182.89	89.781/172.2/97.027	182.89	97.027	-0.90761	2235.8	2897.9	1.5979	0.05503	0.94497	0.11006	0.56157	FALSE
FAM134C_8	FAM134C	73.182/68.291/9.3606	21.03/3.4213/45.611	68.291	21.03	-1.6532	1748.4	1037.7	1.5973	0.0551	0.9449	0.1102	0.56182	FALSE
GDI2_12	GDI2	20.78/71.622/69.845	21.839/86.672/19.074	69.845	21.839	-1.6332	1205.2	1062.3	1.5963	0.055216	0.94478	0.11043	0.56276	FALSE
VPS35_12	VPS35	228.58/158.24/214.57	121.33/115.18/148.44	214.57	121.33	-0.81746	1685.2	3423.2	1.5948	0.055376	0.94462	0.11075	0.56416	FALSE
NonTargeting_Human_0625	NonTargeting_Human_0625	146.36/141.58/73.445	67.133/145.97/24.879	141.58	67.133	-1.0653	2332.6	2219	1.5914	0.055759	0.94424	0.11152	0.56653	FALSE
CSNK1A1_8	CSNK1A1	0/113.26/114.49	47.721/133.43/34.001	113.26	47.721	-1.2297	6415	1758.4	1.5914	0.055763	0.94424	0.11153	0.56653	FALSE
WRB_12	WRB	99.383/73.288/144.01	38.824/55.881/25.708	99.383	38.824	-1.3338	1336.2	1534.4	1.5913	0.055774	0.94423	0.11155	0.56653	FALSE
hsa-mir-6511a-4_7	hsa-mir-6511a-4	134.62/98.272/79.925	34.78/62.723/38.147	98.272	38.147	-1.3425	828.86	1516.5	1.5909	0.055815	0.94419	0.11163	0.56653	FALSE
IRS2_9	IRS2	202.38/143.24/101.53	45.295/68.425/84.588	143.24	68.425	-1.055	2618.7	2246.2	1.5891	0.056024	0.94398	0.11205	0.56744	FALSE
DNASE2_1	DNASE2	224.06/169.89/154.09	22.647/87.812/170.83	169.89	87.812	-0.94427	1592.1	2683.5	1.5888	0.056048	0.94395	0.1121	0.56746	FALSE
GTF2H2_4	GTF2H2	77.7/1.6656/54.724	14.559/66.144/14.927	54.724	14.927	-1.8068	1671.5	823.72	1.5885	0.056088	0.94391	0.11218	0.56762	FALSE
WNT3A_7	WNT3A	213.22/91.61/108.01	44.486/38.774/77.124	108.01	44.486	-1.2609	5669.6	1673.4	1.5864	0.056327	0.94367	0.11265	0.56875	FALSE
MRPS16_1	MRPS16	17.166/136.58/138.25	46.912/91.234/63.855	136.58	63.855	-1.085	7131.4	2137.4	1.586	0.056372	0.94363	0.11274	0.56875	FALSE
HNRNPU_13	HNRNPU	83.121/46.638/79.925	27.5/37.634/11.61	79.925	27.5	-1.5056	559.14	1222.6	1.5858	0.056389	0.94361	0.11278	0.56875	FALSE
SLC26A4_14	SLC26A4	309.9/206.54/141.85	115.66/135.71/111.95	206.54	115.66	-0.83103	7433.7	3289.6	1.5857	0.056399	0.9436	0.1128	0.56875	FALSE
hsa-mir-6859-1_4	hsa-mir-6859-1	72.279/51.635/22.321	47.721/13.685/3.3172	51.635	13.685	-1.8417	642.72	775.31	1.5856	0.056409	0.94359	0.11282	0.56875	FALSE
hsa-mir-6817_6	hsa-mir-6817	116.55/73.288/131.77	135.08/50.179/42.294	116.55	50.179	-1.1997	1051.6	1811.6	1.5845	0.056543	0.94346	0.11309	0.56963	FALSE
RALA_14	RALA	262.01/126.59/59.044	67.133/57.021/47.27	126.59	57.021	-1.1368	11451	1974.6	1.5835	0.056658	0.94334	0.11332	0.57026	FALSE
KIAA1432_3	KIAA1432	136.43/118.26/136.81	63.898/37.634/194.88	136.43	63.898	-1.0824	165.08	2134.9	1.5826	0.056754	0.94325	0.11351	0.57058	FALSE
RTBDN_1	RTBDN	296.34/239.85/241.94	245.08/84.391/143.47	241.94	143.47	-0.74983	1482.2	3879.5	1.5814	0.056899	0.9431	0.1138	0.57136	FALSE
FNTB_2	FNTB	52.402/73.288/26.642	24.265/11.404/14.098	52.402	14.098	-1.8225	549.9	787.33	1.5808	0.056957	0.94304	0.11391	0.57158	FALSE
C12orf43_2	C12orf43	235.81/84.947/226.1	47.721/131.15/149.27	226.1	131.15	-0.78114	10009	3615	1.5799	0.05707	0.94293	0.11414	0.57211	FALSE
CNTN6_12	CNTN6	117.45/114.93/97.927	49.339/33.072/65.514	114.93	49.339	-1.2035	147.72	1785.4	1.5785	0.05722	0.94278	0.11444	0.57337	FALSE
CHRNA3_12	CHRNA3	191.54/146.58/82.805	66.325/152.82/71.319	146.58	71.319	-1.029	3044.2	2300.7	1.5781	0.057269	0.94273	0.11454	0.57348	FALSE
CPM_2	CPM	27.105/69.957/80.645	7.2795/25.089/22.391	69.957	22.391	-1.601	975.27	1064.1	1.5777	0.057319	0.94268	0.11464	0.57348	FALSE
TAF10_11	TAF10	18.973/123.26/202.33	55.001/27.37/60.538	123.26	55.001	-1.1498	8564.1	1920.5	1.5774	0.057355	0.94264	0.11471	0.57348	FALSE
TMEM253_11	TMEM253	266.53/104.93/170.65	88.972/84.391/130.2	170.65	88.972	-0.93193	6755.5	2696	1.5772	0.057372	0.94263	0.11474	0.57348	FALSE
GLOD5_7	GLOD5	0/26.65/24.482	4.853/68.425/1.6586	24.482	4.853	-2.1222	302.03	356.15	1.5764	0.057465	0.94254	0.11493	0.57394	FALSE
EIF3F_7	EIF3F	123.78/3.3313/97.206	38.015/50.179/18.244	97.206	38.015	-1.3318	4759.3	1499.3	1.5762	0.057494	0.94251	0.11499	0.574	FALSE
RABIF_8	RABIF	331.58/193.21/185.05	190.89/106.06/69.66	193.21	106.06	-0.85923	9605.8	3068.6	1.5753	0.057594	0.94241	0.11519	0.57452	FALSE
KLHL20_12	KLHL20	50.595/244.85/209.53	84.928/118.6/139.32	209.53	118.6	-0.81579	13254	3339.4	1.5747	0.057662	0.94234	0.11532	0.57474	FALSE
ARPC5L_15	ARPC5L	253.88/248.18/110.17	148.83/145.97/149.27	248.18	148.83	-0.7339	9539.9	3983.9	1.5744	0.057694	0.94231	0.11539	0.57482	FALSE
UBE2I_1	UBE2I	13.552/0/16.561	4.853/0/2.4879	13.552	2.4879	-2.0608	96.359	192.28	1.5741	0.057737	0.94226	0.11547	0.57502	FALSE
NARF_3	NARF	231.29/118.26/159.85	79.266/180.19/81.271	159.85	81.271	-0.96727	3416.8	2518.3	1.5717	0.058009	0.94199	0.11602	0.57549	FALSE
NMT1_3	NMT1	8.1314/36.644/8.6406	1.6177/0/5.805	8.6406	1.6177	-1.8808	392.22	120.28	1.571	0.058093	0.94191	0.11619	0.57549	FALSE
ARL8A_12	ARL8A	280.08/358.11/272.9	114.85/174.48/220.59	280.08	174.48	-0.67964	3070.2	4519.3	1.5709	0.058103	0.9419	0.11621	0.57549	FALSE
ICA1L_7	ICA1L	73.182/8.3282/38.163	8.8972/29.651/0	38.163	8.8972	-1.9844	1058.2	565.72	1.5707	0.058123	0.94188	0.11625	0.57549	FALSE
MRP63_6	MRP63	95.769/74.953/95.766	40.442/22.808/37.318	95.766	37.318	-1.3365	216.59	1476.2	1.5707	0.058126	0.94187	0.11625	0.57549	FALSE
hsa-mir-1976_6	hsa-mir-1976	169.86/94.941/133.21	71.986/42.196/62.197	133.21	62.197	-1.0866	1403.7	2082.4	1.5702	0.058184	0.94182	0.11637	0.57549	FALSE
hsa-mir-6831_7	hsa-mir-6831	131.01/64.96/156.97	60.663/142.55/51.416	131.01	60.663	-1.0981	2518.1	2046.5	1.5701	0.0582	0.9418	0.1164	0.57549	FALSE
ALG2_13	ALG2	80.41/34.978/61.924	18.603/10.264/24.879	61.924	18.603	-1.6825	533.91	937.01	1.5699	0.058217	0.94178	0.11643	0.57549	FALSE
KMT2D_3	KMT2D	60.534/121.59/72.725	52.574/13.685/24.049	72.725	24.049	-1.5574	1268.3	1108	1.5699	0.058217	0.94178	0.11643	0.57549	FALSE
DOCK5_9	DOCK5	3.6139/119.93/94.326	119.71/18.247/36.489	94.326	36.489	-1.3464	4442	1453.1	1.5691	0.058316	0.94168	0.11663	0.57608	FALSE
NonTargeting_Human_0042	NonTargeting_Human_0042	334.29/83.282/104.41	42.868/125.45/38.147	104.41	42.868	-1.2647	26646	1615.3	1.5679	0.058448	0.94155	0.1169	0.57638	FALSE
TMEM221_2	TMEM221	230.39/98.272/87.846	19.412/61.583/38.977	98.272	38.977	-1.3122	8781.7	1516.5	1.5679	0.058453	0.94155	0.11691	0.57638	FALSE
NonTargeting_Human_0842	NonTargeting_Human_0842	257.49/189.88/201.61	68.751/112.9/126.05	201.61	112.9	-0.83094	1630.1	3207.9	1.5678	0.058465	0.94153	0.11693	0.57638	FALSE
hsa-mir-6515_2	hsa-mir-6515	35.236/19.988/59.044	4.0442/7.9829/18.244	35.236	7.9829	-2.0122	399.67	520.57	1.5677	0.058478	0.94152	0.11696	0.57638	FALSE
ALG8_10	ALG8	124.68/101.6/126.01	84.119/33.072/56.392	124.68	56.392	-1.1308	267.16	1943.6	1.5676	0.058488	0.94151	0.11698	0.57638	FALSE
POLR3C_9	POLR3C	20.78/41.641/16.561	4.0442/22.808/0	20.78	4.0442	-2.1103	226.48	300.21	1.5667	0.058592	0.94141	0.11718	0.57675	FALSE
INPP5J_10	INPP5J	201.48/169.89/163.45	202.21/88.953/50.587	169.89	88.953	-0.92587	519.49	2683.5	1.5667	0.058597	0.9414	0.11719	0.57675	FALSE
NID1_5	NID1	38.85/116.59/154.09	50.957/110.62/36.489	116.59	50.957	-1.1784	3725.1	1812.4	1.5661	0.058657	0.94134	0.11731	0.57688	FALSE
MED26_11	MED26	75.893/34.978/77.765	25.883/103.78/1.6586	75.893	25.883	-1.5162	838.75	1158.3	1.5654	0.058742	0.94126	0.11748	0.57748	FALSE
EWSR1_8	EWSR1	123.78/116.59/188.65	28.309/55.881/96.198	123.78	55.881	-1.1333	2130.2	1928.9	1.565	0.058787	0.94121	0.11757	0.5776	FALSE
RDH14_11	RDH14	176.18/139.91/33.842	45.295/70.706/67.173	139.91	67.173	-1.0475	6283.1	2191.8	1.5649	0.058804	0.9412	0.11761	0.5776	FALSE
GATS_12	GATS	84.928/109.93/88.566	129.41/30.791/33.172	88.566	33.172	-1.3901	234.87	1360.7	1.5641	0.058891	0.94111	0.11778	0.57802	FALSE
MRPL21_8	MRPL21	94.866/53.3/92.166	21.839/35.353/79.612	92.166	35.353	-1.3577	758.92	1418.4	1.5638	0.058937	0.94106	0.11787	0.57805	FALSE
hsa-mir-638_5	hsa-mir-638	159.92/73.288/152.65	60.663/76.408/177.47	152.65	76.408	-0.98909	3175.6	2400.2	1.5635	0.058965	0.94104	0.11793	0.57805	FALSE
C19orf52_3	C19orf52	272.85/84.947/144.73	84.928/70.706/68.002	144.73	70.706	-1.0231	9994.7	2270.5	1.563	0.05903	0.94097	0.11806	0.57805	FALSE
BOLA2_10	BOLA2	153.59/166.56/36.002	69.56/95.795/77.124	153.59	77.124	-0.98463	6997.8	2415.6	1.5629	0.059036	0.94096	0.11807	0.57805	FALSE
SLC12A9_10	SLC12A9	147.27/21.653/106.57	166.62/44.476/28.196	106.57	44.476	-1.242	4433.5	1650.2	1.5624	0.0591	0.9409	0.1182	0.57823	FALSE
DYRK1A_8	DYRK1A	170.76/266.5/426.99	143.97/164.22/233.03	266.5	164.22	-0.69515	17461	4291	1.5616	0.059193	0.94081	0.11839	0.57889	FALSE
HNF4A_6	HNF4A	67.761/131.59/218.17	61.472/78.689/34.83	131.59	61.472	-1.0856	5785.6	2055.9	1.5609	0.059271	0.94073	0.11854	0.57895	FALSE
NR2C2AP_12	NR2C2AP	308.09/301.48/230.42	192.5/217.82/141.81	301.48	192.5	-0.64448	2546.9	4879.8	1.5601	0.05937	0.94063	0.11874	0.57954	FALSE
GZF1_15	GZF1	49.692/134.92/137.53	94.634/28.511/63.855	134.92	63.855	-1.0674	3635	2110.2	1.56	0.059383	0.94062	0.11877	0.57954	FALSE
NonTargeting_Human_0142	NonTargeting_Human_0142	193.35/258.17/244.82	272.58/147.11/102	244.82	147.11	-0.73087	1413.8	3927.6	1.5593	0.059458	0.94054	0.11892	0.57962	FALSE
TAOK1_12	TAOK1	84.024/96.607/77.045	121.33/26.23/30.684	84.024	30.684	-1.4241	103.51	1288	1.5584	0.059567	0.94043	0.11913	0.58022	FALSE
HIST1H2BB_14	HIST1H2BB	3.6139/0/12.961	0/15.966/0	3.6139	0	-2.206	50.213	48.494	1.5576	0.05966	0.94034	0.11932	0.5809	FALSE
NR2C2AP_10	NR2C2AP	193.35/116.59/132.49	62.28/63.864/33.172	132.49	62.28	-1.0769	1978.1	2070.7	1.557	0.059738	0.94026	0.11948	0.58117	FALSE
DDX27_7	DDX27	56.016/123.26/135.37	63.898/55.881/21.562	123.26	55.881	-1.1273	2334	1920.5	1.5566	0.05978	0.94022	0.11956	0.58117	FALSE
WRB_6	WRB	87.638/156.57/148.33	73.604/66.144/120.25	148.33	73.604	-1.0012	1875.7	2329.4	1.5566	0.059783	0.94022	0.11957	0.58117	FALSE
BAGE2_2	BAGE2	172.57/121.59/87.846	38.015/54.74/90.393	121.59	54.74	-1.1371	1868.6	1893.4	1.5566	0.059784	0.94022	0.11957	0.58117	FALSE
ELF4_5	ELF4	97.576/121.59/48.243	100.3/22.808/38.977	97.576	38.977	-1.3021	1505.2	1505.3	1.5558	0.059878	0.94012	0.11976	0.58157	FALSE
ATP5O_8	ATP5O	112.94/94.941/114.49	71.986/38.774/48.928	112.94	48.928	-1.1903	163.11	1753.1	1.5558	0.059882	0.94012	0.11976	0.58157	FALSE
NonTargeting_Human_0904	NonTargeting_Human_0904	223.16/144.91/96.486	178.75/69.566/71.319	144.91	71.319	-1.0126	4234	2273.4	1.5527	0.060251	0.93975	0.1205	0.58248	FALSE
MED9_6	MED9	14.456/144.91/153.37	135.08/53.6/71.319	144.91	71.319	-1.0126	8544.9	2273.4	1.5527	0.060251	0.93975	0.1205	0.58248	FALSE
CCDC101_8	CCDC101	168.95/144.91/82.085	192.5/45.617/71.319	144.91	71.319	-1.0126	2262.5	2273.4	1.5527	0.060251	0.93975	0.1205	0.58248	FALSE
hsa-mir-1908_12	hsa-mir-1908	180.7/189.88/134.65	97.869/63.864/166.69	180.7	97.869	-0.87794	1102.4	2861.7	1.5512	0.060427	0.93957	0.12085	0.58301	FALSE
TRAPPC1_11	TRAPPC1	9.0349/73.288/64.804	13.75/20.528/39.806	64.804	20.528	-1.612	1591.1	982.49	1.5488	0.06072	0.93928	0.12144	0.5846	FALSE
CABIN1_13	CABIN1	171.66/318.14/266.42	165/220.1/53.075	266.42	165	-0.68789	5826.7	4289.6	1.5486	0.060736	0.93926	0.12147	0.5846	FALSE
ASH2L_8	ASH2L	67.761/183.22/143.29	70.369/47.898/74.636	143.29	70.369	-1.0156	3649.5	2246.9	1.548	0.060806	0.93919	0.12161	0.5846	FALSE
RBBP5_6	RBBP5	77.7/9.9938/46.803	0/19.387/12.439	46.803	12.439	-1.8306	1154.8	699.84	1.5474	0.060885	0.93912	0.12177	0.5846	FALSE
GTDC2_8	GTDC2	312.61/151.57/77.045	131.03/76.408/61.368	151.57	76.408	-0.97894	15743	2382.5	1.5473	0.0609	0.9391	0.1218	0.5846	FALSE
TMEM67_11	TMEM67	291.83/286.49/286.58	138.31/181.33/211.47	286.58	181.33	-0.65743	13.768	4628.6	1.5471	0.060914	0.93909	0.12183	0.5846	FALSE
UBE2Q1_6	UBE2Q1	99.383/183.22/38.883	40.442/55.881/32.342	99.383	40.442	-1.2764	5344.4	1534.4	1.5468	0.06095	0.93905	0.1219	0.5846	FALSE
HYOU1_2	HYOU1	93.059/84.947/119.53	12.941/36.493/73.807	93.059	36.493	-1.3269	383.2	1432.7	1.5466	0.060984	0.93902	0.12197	0.58469	FALSE
NonTargeting_Human_0312	NonTargeting_Human_0312	74.086/59.963/48.963	55.001/13.685/18.244	59.963	18.244	-1.6635	160.22	906.09	1.5455	0.061117	0.93888	0.12223	0.58516	FALSE
SULT6B1_4	SULT6B1	212.32/63.294/169.93	150.44/90.093/77.953	169.93	90.093	-0.908	6584.1	2684.1	1.545	0.061169	0.93883	0.12234	0.58516	FALSE
CCL14_7	CCL14	103.9/98.272/55.444	29.118/102.64/39.806	98.272	39.806	-1.2826	932.99	1516.5	1.545	0.061177	0.93882	0.12235	0.58516	FALSE
ORMDL1_5	ORMDL1	132.81/139.91/40.323	63.089/35.353/82.1	132.81	63.089	-1.0621	4302.4	2075.9	1.5439	0.061304	0.9387	0.12261	0.58592	FALSE
NonTargeting_Human_0214	NonTargeting_Human_0214	251.17/79.95/218.89	127.8/144.83/118.59	218.89	127.8	-0.77172	10174	3495.1	1.5418	0.061566	0.93843	0.12313	0.58796	FALSE
WDR55_8	WDR55	67.761/86.613/72.725	180.37/5.7021/24.879	72.725	24.879	-1.5104	108.76	1108	1.5403	0.061742	0.93826	0.12348	0.58895	FALSE
MESDC2_5	MESDC2	75.893/18.322/54.724	40.442/15.966/14.098	54.724	15.966	-1.7157	886.61	823.72	1.5389	0.061913	0.93809	0.12383	0.59012	FALSE
RHOT2_2	RHOT2	201.48/169.89/134.65	122.13/67.285/90.393	169.89	90.393	-0.90296	1119.9	2683.5	1.5387	0.061941	0.93806	0.12388	0.59016	FALSE
WDHD1_2	WDHD1	71.375/21.653/50.403	5.6618/43.336/14.098	50.403	14.098	-1.7675	633.2	756.04	1.5379	0.062032	0.93797	0.12406	0.59034	FALSE
NHLRC2_2	NHLRC2	96.673/33.313/50.403	3.2353/39.915/14.098	50.403	14.098	-1.7675	1216.5	756.04	1.5379	0.062032	0.93797	0.12406	0.59034	FALSE
NonTargeting_Human_0257	NonTargeting_Human_0257	44.271/51.635/50.403	29.118/12.545/14.098	50.403	14.098	-1.7675	19.562	756.04	1.5379	0.062032	0.93797	0.12406	0.59034	FALSE
DNAJC17_8	DNAJC17	56.016/9.9938/75.605	12.133/28.511/16.586	56.016	16.586	-1.697	1250.9	844.01	1.5373	0.062106	0.93789	0.12421	0.5908	FALSE
STAG2_12	STAG2	103/83.282/129.61	76.839/27.37/43.123	103	43.123	-1.2369	548.43	1592.6	1.537	0.062143	0.93786	0.12429	0.59084	FALSE
STOML3_5	STOML3	170.76/64.96/146.17	175.52/72.987/68.002	146.17	72.987	-0.99214	3599.8	2294.1	1.5366	0.062197	0.9378	0.12439	0.59084	FALSE
STARD4_9	STARD4	74.989/51.635/78.485	0.80884/26.23/93.71	74.989	26.23	-1.4806	278.83	1144	1.5364	0.062225	0.93777	0.12445	0.59084	FALSE
NUDT17_3	NUDT17	143.65/151.57/46.083	71.178/110.62/39.806	143.65	71.178	-1.003	4791.4	2252.9	1.5363	0.062226	0.93777	0.12445	0.59084	FALSE
DNAJC13_1	DNAJC13	86.735/88.279/72.005	44.486/33.072/1.6586	86.735	33.072	-1.3645	109.68	1331.4	1.5341	0.062507	0.93749	0.12501	0.59211	FALSE
GPN1_2	GPN1	192.44/166.56/66.244	88.163/112.9/73.807	166.56	88.163	-0.91019	5366.8	2628.7	1.5335	0.062572	0.93743	0.12514	0.59211	FALSE
CHMP1A_2	CHMP1A	106.61/31.647/140.41	56.618/45.617/36.489	106.61	45.617	-1.2069	3381	1650.9	1.5335	0.06258	0.93742	0.12516	0.59211	FALSE
SRP14_6	SRP14	200.57/136.58/246.98	129.41/114.04/61.368	200.57	114.04	-0.80915	3124.1	3190.6	1.5334	0.062591	0.93741	0.12518	0.59211	FALSE
DHDDS_1	DHDDS	79.507/133.25/198.73	63.898/61.583/64.685	133.25	63.898	-1.0487	3588.2	2083.1	1.5327	0.062671	0.93733	0.12534	0.59212	FALSE
RNPEP_2	RNPEP	154.5/56.632/70.565	44.486/23.949/9.1222	70.565	23.949	-1.5203	3619.3	1073.7	1.532	0.062764	0.93724	0.12553	0.59212	FALSE
hsa-mir-3670-1_1	hsa-mir-3670-1	76.796/19.988/135.37	23.456/27.37/34.001	76.796	27.37	-1.4553	3329	1172.7	1.5318	0.062787	0.93721	0.12557	0.59212	FALSE
PGM1_14	PGM1	159.92/171.56/117.37	83.31/66.144/181.61	159.92	83.31	-0.93254	973	2519.4	1.5317	0.062802	0.9372	0.1256	0.59212	FALSE
TM9SF2_12	TM9SF2	377.66/309.81/198.73	201.4/123.17/205.66	309.81	201.4	-0.61881	8470.5	5020.5	1.53	0.063004	0.937	0.12601	0.59334	FALSE
DYRK1A_1	DYRK1A	58.727/98.272/95.766	31.545/38.774/108.64	95.766	38.774	-1.2827	689.11	1476.2	1.5297	0.06305	0.93695	0.1261	0.59354	FALSE
S100A10_8	S100A10	31.622/43.306/45.363	3.2353/11.404/37.318	43.306	11.404	-1.8367	70.378	645.42	1.5279	0.063266	0.93673	0.12653	0.59488	FALSE
PHF3_6	PHF3	0/3.3313/7.9205	0/26.23/0	3.3313	0	-2.1148	16.079	44.548	1.526	0.063506	0.93649	0.12701	0.59566	FALSE
SNRPD1_9	SNRPD1	0/3.3313/33.842	0/94.655/0	3.3313	0	-2.1148	471.01	44.548	1.526	0.063506	0.93649	0.12701	0.59566	FALSE
NonTargeting_Human_0395	NonTargeting_Human_0395	258.4/289.82/112.33	118.09/210.98/160.05	258.4	160.05	-0.68762	11162	4155.1	1.5259	0.063519	0.93648	0.12704	0.59566	FALSE
FAM57B_10	FAM57B	349.65/134.92/192.97	125.37/83.251/108.64	192.97	108.64	-0.82312	13959	3064.7	1.5253	0.063597	0.9364	0.12719	0.59593	FALSE
USO1_1	USO1	115.65/34.978/54.004	31.545/15.966/3.3172	54.004	15.966	-1.6969	2080.9	812.42	1.5236	0.063804	0.9362	0.12761	0.59612	FALSE
CNOT2_10	CNOT2	88.542/84.947/26.642	32.353/72.987/25.708	84.947	32.353	-1.3656	1706.2	1302.8	1.5234	0.063834	0.93617	0.12767	0.59612	FALSE
NID1_12	NID1	253.88/176.56/230.42	195.74/137.99/110.3	230.42	137.99	-0.73549	1725.6	3687.1	1.5227	0.063921	0.93608	0.12784	0.59612	FALSE
CACNA1A_13	CACNA1A	133.72/69.957/136.81	50.148/136.85/64.685	133.72	64.685	-1.0363	2037.4	2090.7	1.5225	0.063939	0.93606	0.12788	0.59612	FALSE
MBTPS2_5	MBTPS2	68.665/73.288/166.33	15.368/104.92/25.708	73.288	25.708	-1.4759	4339.2	1116.9	1.5219	0.06402	0.93598	0.12804	0.59612	FALSE
PRELP_12	PRELP	269.24/359.78/203.05	169.05/156.24/236.35	269.24	169.05	-0.6683	6288.8	4337	1.5215	0.064062	0.93594	0.12812	0.59612	FALSE
MRPS16_3	MRPS16	116.55/83.282/110.89	80.075/39.915/48.928	110.89	48.928	-1.1641	397.07	1720	1.5214	0.06408	0.93592	0.12816	0.59612	FALSE
TCERG1_4	TCERG1	57.823/99.938/38.883	17.794/17.106/69.66	57.823	17.794	-1.6461	1066.2	872.41	1.5208	0.064152	0.93585	0.1283	0.59612	FALSE
KDM8_2	KDM8	182.5/138.25/101.53	63.089/94.655/68.002	138.25	68.002	-1.0129	1653.5	2164.6	1.5208	0.064154	0.93585	0.12831	0.59612	FALSE
GTDC2_13	GTDC2	246.65/244.85/154.09	149.63/116.32/187.42	244.85	149.63	-0.70671	4120.1	3928.2	1.5195	0.064317	0.93568	0.12863	0.59644	FALSE
GINS2_8	GINS2	63.244/3.3313/36.722	23.456/9.1234/1.6586	36.722	9.1234	-1.8977	909.18	543.48	1.5194	0.064336	0.93566	0.12867	0.59644	FALSE
PAM16_5	PAM16	22.587/93.275/79.205	29.118/23.949/30.684	79.205	29.118	-1.4131	1701.8	1211.1	1.5192	0.064351	0.93565	0.1287	0.59644	FALSE
CACNA1A_3	CACNA1A	140.94/108.27/54.724	44.486/83.251/47.27	108.27	47.27	-1.1787	1967.3	1677.6	1.5191	0.064373	0.93563	0.12875	0.59644	FALSE
PPP1R8_11	PPP1R8	66.858/101.6/96.486	39.633/61.583/18.244	96.486	39.633	-1.2626	452.02	1487.8	1.5184	0.06446	0.93554	0.12892	0.59673	FALSE
COA4_11	COA4	176.18/73.288/127.45	114.05/60.442/44.782	127.45	60.442	-1.0639	2654	1988.6	1.5182	0.064478	0.93552	0.12896	0.59673	FALSE
IL17RA_1	IL17RA	395.73/218.2/270.02	220/169.92/82.929	270.02	169.92	-0.66504	9244	4350.1	1.5178	0.064535	0.93547	0.12907	0.59673	FALSE
NonTargeting_Human_0957	NonTargeting_Human_0957	224.06/93.275/30.242	0/37.634/48.099	93.275	37.634	-1.287	10539	1436.2	1.5177	0.064546	0.93545	0.12909	0.59673	FALSE
FURIN_6	FURIN	177.08/194.88/56.164	94.634/96.936/121.91	177.08	96.936	-0.86264	7469.1	2802	1.5171	0.064617	0.93538	0.12923	0.59673	FALSE
MORC2_7	MORC2	186.12/89.944/177.13	106.77/76.408/97.027	177.13	97.027	-0.86169	3841.2	2802.8	1.5161	0.064747	0.93525	0.12949	0.59673	FALSE
GFER_11	GFER	308.09/241.52/165.61	147.21/179.05/131.86	241.52	147.21	-0.71046	5096.7	3872.5	1.5159	0.064773	0.93523	0.12955	0.59673	FALSE
LONP1_13	LONP1	28.912/46.638/52.563	12.941/23.949/6.6343	46.638	12.941	-1.7727	174.67	697.26	1.5158	0.064784	0.93522	0.12957	0.59673	FALSE
TBPL2_1	TBPL2	334.29/183.22/294.5	150.44/318.18/189.91	294.5	189.91	-0.63028	6983.2	4762.1	1.5157	0.064795	0.93521	0.12959	0.59673	FALSE
SSH3_4	SSH3	80.41/59.963/87.126	29.927/53.6/25.708	80.41	29.927	-1.3963	231.6	1230.3	1.5156	0.064808	0.93519	0.12962	0.59673	FALSE
ATP5I_3	ATP5I	15.359/53.3/50.403	14.559/14.825/0.82929	50.403	14.559	-1.7241	618.24	756.04	1.5144	0.064959	0.93504	0.12992	0.59722	FALSE
BAGE2_11	BAGE2	123.78/141.58/142.57	94.634/70.706/64.685	141.58	70.706	-0.99159	158.93	2219	1.5142	0.064983	0.93502	0.12997	0.59722	FALSE
WRB_4	WRB	64.147/19.988/33.122	0.80884/7.9829/9.9515	33.122	7.9829	-1.9254	567.54	488.06	1.5139	0.065024	0.93498	0.13005	0.59738	FALSE
CEBPA_10	CEBPA	179.79/149.91/90.726	76.839/57.021/112.78	149.91	76.839	-0.95509	2197.8	2355.2	1.5129	0.065147	0.93485	0.13029	0.59806	FALSE
PPM1A_7	PPM1A	196.06/189.88/100.09	84.119/120.88/106.98	189.88	106.98	-0.82194	4050.7	3013.5	1.5122	0.065241	0.93476	0.13048	0.59825	FALSE
CCL14_5	CCL14	105.71/88.279/79.925	34.78/28.511/78.783	88.279	34.78	-1.3192	186.78	1356.1	1.5108	0.065423	0.93458	0.13085	0.59969	FALSE
WNT3A_6	WNT3A	159.92/101.6/202.33	38.824/84.391/164.2	159.92	84.391	-0.91416	2599.8	2519.4	1.5099	0.06553	0.93447	0.13106	0.59982	FALSE
THOC6_3	THOC6	108.42/119.93/140.41	17.794/59.302/55.563	119.93	55.563	-1.0962	276	1866.4	1.5097	0.065563	0.93444	0.13113	0.59985	FALSE
C11orf57_10	C11orf57	133.72/94.941/42.483	134.27/38.774/38.977	94.941	38.977	-1.263	2127.7	1462.9	1.5093	0.065609	0.93439	0.13122	0.60004	FALSE
GART_3	GART	117.45/169.89/54.004	95.443/41.055/53.904	117.45	53.904	-1.1093	3388	1826.3	1.5086	0.065703	0.9343	0.13141	0.60035	FALSE
FBXL5_12	FBXL5	59.63/69.957/81.365	24.265/17.106/96.198	69.957	24.265	-1.4898	118.4	1064.1	1.5086	0.065706	0.93429	0.13141	0.60035	FALSE
NonTargeting_Human_0232	NonTargeting_Human_0232	125.58/198.21/200.89	207.87/82.11/113.61	198.21	113.61	-0.79752	2640.9	3151.4	1.5085	0.065716	0.93428	0.13143	0.60035	FALSE
PON1_11	PON1	135.52/98.272/133.21	153.68/65.004/49.757	133.21	65.004	-1.0239	612.96	2082.4	1.5073	0.065866	0.93413	0.13173	0.60149	FALSE
THOC6_15	THOC6	195.15/119.93/147.61	16.177/161.94/75.465	147.61	75.465	-0.95865	1513.4	2317.6	1.5064	0.065978	0.93402	0.13196	0.60184	FALSE
DYRK1A_6	DYRK1A	132.81/163.23/148.33	76.031/82.11/65.514	148.33	76.031	-0.955	231.43	2329.4	1.5057	0.066078	0.93392	0.13216	0.60209	FALSE
MOCS3_14	MOCS3	199.67/108.27/150.49	77.648/142.55/58.88	150.49	77.648	-0.94574	2100.8	2364.8	1.505	0.066159	0.93384	0.13232	0.60214	FALSE
UBE2I_11	UBE2I	16.263/59.963/15.121	0/3.4213/7.4636	16.263	3.4213	-1.9651	955.5	232.52	1.5044	0.066235	0.93376	0.13247	0.60254	FALSE
SAP130_13	SAP130	97.576/73.288/51.123	21.839/26.23/33.172	73.288	26.23	-1.4479	540.6	1116.9	1.5036	0.066338	0.93366	0.13268	0.60254	FALSE
PDRG1_4	PDRG1	118.36/139.91/113.77	41.251/92.374/54.733	118.36	54.733	-1.0987	242.87	1840.9	1.5036	0.066346	0.93365	0.13269	0.60254	FALSE
PGM1_11	PGM1	440/279.83/354.98	151.25/240.63/345.81	354.98	240.63	-0.55902	6438	5786.1	1.5034	0.066372	0.93363	0.13274	0.60254	FALSE
PROX1_5	PROX1	42.464/66.625/110.89	22.647/51.319/10.781	66.625	22.647	-1.5159	1271.5	1011.3	1.5027	0.066464	0.93354	0.13293	0.60254	FALSE
DDX4_6	DDX4	229.49/231.52/182.89	127.8/287.39/138.49	229.49	138.49	-0.7245	1087.5	3671.5	1.5023	0.066515	0.93349	0.13303	0.60254	FALSE
TSPAN11_9	TSPAN11	141.85/229.86/186.49	82.501/104.92/122.74	186.49	104.92	-0.82387	1936.9	2957.4	1.5022	0.066524	0.93348	0.13305	0.60254	FALSE
HSD17B10_14	HSD17B10	106.61/118.26/138.97	26.692/54.74/103.66	118.26	54.74	-1.0973	282.28	1839.4	1.5018	0.066575	0.93342	0.13315	0.60261	FALSE
DARS_15	DARS	50.595/28.316/0.72005	8.0884/0/6.6343	28.316	6.6343	-1.9411	628.95	414.47	1.5001	0.066794	0.93321	0.13359	0.60283	FALSE
TBXAS1_1	TBXAS1	38.85/169.89/69.125	17.794/49.038/24.049	69.125	24.049	-1.4851	5535.6	1050.9	1.5	0.066805	0.9332	0.13361	0.60283	FALSE
ARGLU1_1	ARGLU1	56.016/19.988/65.524	8.0884/35.353/17.415	56.016	17.415	-1.6305	694.23	844.01	1.4996	0.066856	0.93314	0.13371	0.60283	FALSE
NonTargeting_Human_0962	NonTargeting_Human_0962	309.9/208.2/195.85	262.06/120.88/121.91	208.2	121.91	-0.76736	5246.8	3317.3	1.4994	0.066882	0.93312	0.13376	0.60283	FALSE
SRP14_12	SRP14	100.29/113.26/321.14	107.58/33.072/51.416	113.26	51.416	-1.1243	21691	1758.4	1.4993	0.066896	0.9331	0.13379	0.60283	FALSE
STAG2_7	STAG2	27.105/53.3/82.805	16.177/18.247/10.781	53.3	16.177	-1.6605	778.39	801.4	1.4985	0.067004	0.933	0.13401	0.60296	FALSE
CCT6A_8	CCT6A	173.47/124.92/131.05	5.6618/63.864/113.61	131.05	63.864	-1.0256	918.51	2047.2	1.4983	0.067026	0.93297	0.13405	0.60296	FALSE
PGA3_5	PGA3	0/18.322/10.801	89.781/2.2808/0	10.801	2.2808	-1.8467	86.612	151.78	1.4982	0.067041	0.93296	0.13408	0.60296	FALSE
WDR61_5	WDR61	89.445/84.947/48.963	95.443/23.949/33.172	84.947	33.172	-1.3307	657.54	1302.8	1.4982	0.067044	0.93296	0.13409	0.60296	FALSE
RBBP5_12	RBBP5	8.1314/46.638/88.566	7.2795/18.247/13.269	46.638	13.269	-1.7393	1620.4	697.26	1.4979	0.067081	0.93292	0.13416	0.60296	FALSE
LAS1L_15	LAS1L	22.587/46.638/83.526	117.28/12.545/13.269	46.638	13.269	-1.7393	969.57	697.26	1.4979	0.067081	0.93292	0.13416	0.60296	FALSE
SNF8_8	SNF8	116.55/129.92/144.73	63.089/149.4/53.904	129.92	63.089	-1.0305	199.05	2028.8	1.4976	0.067112	0.93289	0.13422	0.60296	FALSE
RBM14_13	RBM14	177.08/219.86/109.45	75.222/98.076/246.3	177.08	98.076	-0.84594	3202.4	2802	1.4955	0.067394	0.93261	0.13479	0.60363	FALSE
MORC2_12	MORC2	297.25/141.58/195.13	295.22/100.36/111.95	195.13	111.95	-0.79609	6647.6	3100.4	1.4955	0.067397	0.9326	0.13479	0.60363	FALSE
GPN1_3	GPN1	52.402/153.24/105.13	46.104/58.161/8.2929	105.13	46.104	-1.1719	2547.3	1626.9	1.4953	0.067422	0.93258	0.13484	0.60363	FALSE
SAP130_1	SAP130	156.3/188.22/177.85	118.9/93.515/98.686	177.85	98.686	-0.84331	285.89	2814.7	1.495	0.067452	0.93255	0.1349	0.60363	FALSE
MORC2_14	MORC2	48.788/28.316/32.402	74.413/7.9829/4.9757	32.402	7.9829	-1.8947	142.6	477	1.495	0.06746	0.93254	0.13492	0.60363	FALSE
SORT1_4	SORT1	52.402/8.3282/38.883	44.486/10.264/9.9515	38.883	10.264	-1.8241	558.18	576.85	1.4943	0.067543	0.93246	0.13509	0.60393	FALSE
ZNF263_2	ZNF263	348.75/164.9/198.73	114.85/106.06/341.67	198.73	114.85	-0.78576	11824	3160.1	1.4936	0.067645	0.93235	0.13529	0.60443	FALSE
STAG2_5	STAG2	38.85/56.632/22.321	42.059/10.264/0	38.85	10.264	-1.8229	294.69	576.34	1.4935	0.067648	0.93235	0.1353	0.60443	FALSE
KMT2D_15	KMT2D	179.79/194.88/167.05	145.59/93.515/100.34	179.79	100.34	-0.83508	194.97	2846.8	1.4917	0.067884	0.93212	0.13577	0.60574	FALSE
LONP1_6	LONP1	0.90349/54.966/100.81	20.221/17.106/13.269	54.966	17.106	-1.6281	2512.1	827.52	1.4912	0.067957	0.93204	0.13591	0.60578	FALSE
SNF8_3	SNF8	19.877/54.966/69.125	60.663/17.106/0	54.966	17.106	-1.6281	715.86	827.52	1.4912	0.067957	0.93204	0.13591	0.60578	FALSE
EPN1_15	EPN1	125.58/66.625/107.29	47.721/53.6/36.489	107.29	47.721	-1.1522	994.09	1661.8	1.4907	0.068024	0.93198	0.13605	0.60578	FALSE
STK11_8	STK11	209.61/178.22/153.37	100.3/99.217/82.929	178.22	99.217	-0.83863	801.36	2820.8	1.4904	0.068066	0.93193	0.13613	0.60578	FALSE
ZFP3_11	ZFP3	60.534/111.6/110.89	203.02/50.179/39.806	110.89	50.179	-1.1284	1268	1720	1.4899	0.068125	0.93187	0.13625	0.60587	FALSE
RALA_1	RALA	98.48/41.641/4.3203	49.339/11.404/6.6343	41.641	11.404	-1.7814	2311.8	619.57	1.4887	0.068279	0.93172	0.13656	0.60629	FALSE
ZBTB17_12	ZBTB17	152.69/79.95/216.73	80.075/161.94/68.831	152.69	80.075	-0.92269	4696.4	2400.8	1.4884	0.06832	0.93168	0.13664	0.60638	FALSE
RBBP5_1	RBBP5	7.2279/34.978/15.841	15.368/3.4213/0	15.841	3.4213	-1.9295	220.21	226.24	1.4883	0.068339	0.93166	0.13668	0.60638	FALSE
RTBDN_8	RTBDN	352.36/254.84/339.86	340.52/229.22/210.64	339.86	229.22	-0.56615	3692.3	5529.3	1.4879	0.068389	0.93161	0.13678	0.60643	FALSE
USO1_4	USO1	159.01/176.56/182.89	99.487/98.076/81.271	176.56	98.076	-0.84167	173.96	2793.4	1.4879	0.068394	0.93161	0.13679	0.60643	FALSE
TAF1_15	TAF1	56.92/39.975/34.562	21.839/0/10.781	39.975	10.781	-1.7983	158.21	593.75	1.4875	0.068444	0.93156	0.13689	0.60665	FALSE
TAF2_9	TAF2	41.56/29.981/56.884	31.545/11.404/9.1222	41.56	11.404	-1.7787	184.44	618.32	1.4868	0.068533	0.93147	0.13707	0.60719	FALSE
LIMS3_2	LIMS3	144.56/134.92/101.53	12.133/78.689/67.173	134.92	67.173	-0.99545	603.91	2110.2	1.4863	0.068603	0.9314	0.13721	0.60719	FALSE
KIAA1328_6	KIAA1328	119.26/24.984/60.484	11.324/60.442/19.903	60.484	19.903	-1.5565	2357.4	914.3	1.4862	0.068611	0.93139	0.13722	0.60719	FALSE
hsa-mir-550a-1_5	hsa-mir-550a-1	73.182/84.947/29.522	26.692/44.476/7.4636	73.182	26.692	-1.4216	1022.3	1115.3	1.4855	0.068706	0.93129	0.13741	0.60719	FALSE
SPI1_4	SPI1	217.74/141.58/128.17	62.28/213.26/72.148	141.58	72.148	-0.96286	2990.2	2219	1.4831	0.069018	0.93098	0.13804	0.60874	FALSE
ATP13A1_4	ATP13A1	116.55/174.89/229.7	97.06/185.89/95.368	174.89	97.06	-0.84294	3203.6	2765.9	1.483	0.069037	0.93096	0.13807	0.60874	FALSE
ATP6V1B1_8	ATP6V1B1	209.61/204.87/126.73	50.957/223.52/120.25	204.87	120.25	-0.7638	3064.5	3262	1.4829	0.069053	0.93095	0.13811	0.60874	FALSE
MORC3_13	MORC3	75.893/49.969/83.526	28.309/92.374/13.269	75.893	28.309	-1.3915	365.15	1158.3	1.4829	0.069053	0.93095	0.13811	0.60874	FALSE
INTS6_7	INTS6	24.394/38.31/5.7604	5.6618/22.808/0	24.394	5.6618	-1.9305	270.43	354.82	1.4826	0.069093	0.93091	0.13819	0.60876	FALSE
STARD4_2	STARD4	168.95/111.6/93.606	50.957/27.37/92.051	111.6	50.957	-1.1158	1806.6	1731.5	1.4825	0.069105	0.93089	0.13821	0.60876	FALSE
WNT3A_8	WNT3A	187.92/319.8/323.3	145.59/236.07/213.13	319.8	213.13	-0.58321	8701.8	5189.5	1.4808	0.069326	0.93067	0.13865	0.60946	FALSE
NonTargeting_Human_0421	NonTargeting_Human_0421	308.99/241.52/117.37	184.41/149.4/94.539	241.52	149.4	-0.68933	9982.9	3872.5	1.4807	0.06934	0.93066	0.13868	0.60946	FALSE
ANAPC16_3	ANAPC16	110.23/126.59/133.93	61.472/95.795/51.416	126.59	61.472	-1.0302	160.82	1974.6	1.4805	0.069366	0.93063	0.13873	0.60946	FALSE
EXOC2_14	EXOC2	46.981/74.953/17.281	13.75/9.1234/50.587	46.981	13.75	-1.7017	832.27	702.61	1.4798	0.069468	0.93053	0.13894	0.60946	FALSE
EPN1_7	EPN1	151.79/193.21/62.644	75.222/79.829/97.027	151.79	79.829	-0.91855	4831.2	2386	1.4796	0.069485	0.93052	0.13897	0.60946	FALSE
hsa-mir-6515_9	hsa-mir-6515	77.7/93.275/121.69	162.58/28.511/38.977	93.275	38.977	-1.2377	524.94	1436.2	1.4794	0.069517	0.93048	0.13903	0.60946	FALSE
NDUFA13_12	NDUFA13	38.85/53.3/144.01	47.721/10.264/16.586	53.3	16.586	-1.6265	4218.5	801.4	1.4792	0.069543	0.93046	0.13909	0.60946	FALSE
KMT2D_10	KMT2D	120.16/68.291/122.41	56.618/57.021/68.831	120.16	57.021	-1.0623	1347.9	1870.2	1.4788	0.069596	0.9304	0.13919	0.60954	FALSE
NonTargeting_Human_0360	NonTargeting_Human_0360	177.08/153.24/173.53	96.251/166.5/61.368	173.53	96.251	-0.8437	212.22	2743.5	1.4786	0.069619	0.93038	0.13924	0.60954	FALSE
FZD6_8	FZD6	449.03/536.33/353.54	321.92/358.09/314.3	449.03	321.92	-0.47887	8369.8	7392.9	1.4784	0.06965	0.93035	0.1393	0.60959	FALSE
RCC1_7	RCC1	2.7105/63.294/77.045	8.0884/36.493/21.562	63.294	21.562	-1.5108	1929.7	958.63	1.4772	0.069815	0.93019	0.13963	0.61059	FALSE
MED12_13	MED12	58.727/124.92/130.33	73.604/60.442/47.27	124.92	60.442	-1.0352	2205.6	1947.5	1.477	0.069832	0.93017	0.13966	0.61059	FALSE
TRAPPC1_12	TRAPPC1	37.946/108.27/121.69	37.206/115.18/48.928	108.27	48.928	-1.1299	2562.5	1677.6	1.4766	0.069888	0.93011	0.13978	0.61059	FALSE
CORO1A_3	CORO1A	427.35/379.76/229.7	308.98/263.44/248.79	379.76	263.44	-0.52597	12392	6207.9	1.4764	0.069915	0.93009	0.13983	0.6106	FALSE
USP39_2	USP39	154.5/61.628/59.764	5.6618/51.319/20.732	61.628	20.732	-1.527	4313.9	932.35	1.476	0.069974	0.93003	0.13995	0.6109	FALSE
MTHFD1_14	MTHFD1	160.82/149.91/96.486	115.66/78.689/72.148	149.91	78.689	-0.92121	1486.4	2355.2	1.4744	0.070189	0.92981	0.14038	0.61255	FALSE
PRR20A_3	PRR20A	103.9/58.297/84.966	21.03/156.24/34.001	84.966	34.001	-1.2964	534.87	1303.1	1.4731	0.070359	0.92964	0.14072	0.61316	FALSE
S100A14_4	S100A14	51.499/243.18/313.94	151.25/95.795/153.42	243.18	151.25	-0.6815	20875	3900.3	1.4723	0.070464	0.92954	0.14093	0.61386	FALSE
HMOX2_11	HMOX2	288.21/158.24/209.53	124.56/112.9/222.25	209.53	124.56	-0.74567	4410.9	3339.4	1.4714	0.070586	0.92941	0.14117	0.61402	FALSE
DYRK1A_15	DYRK1A	49.692/183.22/150.49	79.266/85.532/65.514	150.49	79.266	-0.91636	5615.8	2364.8	1.4714	0.070594	0.92941	0.14119	0.61402	FALSE
PAGE4_15	PAGE4	317.12/264.84/180.73	174.71/168.78/165.86	264.84	168.78	-0.64685	4903.7	4263.1	1.4713	0.070605	0.9294	0.14121	0.61402	FALSE
DNAJC13_12	DNAJC13	96.673/59.963/138.97	40.442/75.268/41.465	96.673	41.465	-1.2017	1568.3	1490.8	1.4708	0.070666	0.92933	0.14133	0.61431	FALSE
NOTCH2NL_14	NOTCH2NL	17.166/88.279/82.085	4.853/200.71/32.342	82.085	32.342	-1.3172	2126.4	1257	1.4703	0.070737	0.92926	0.14147	0.61431	FALSE
DOCK5_3	DOCK5	303.57/178.22/119.53	217.58/57.021/100.34	178.22	100.34	-0.82249	9578.6	2820.8	1.469	0.070913	0.92909	0.14183	0.6154	FALSE
DHX36_6	DHX36	236.71/93.275/138.25	97.869/33.072/70.49	138.25	70.49	-0.96186	5858.9	2164.6	1.4664	0.071265	0.92874	0.14253	0.61753	FALSE
PDRG1_13	PDRG1	108.42/46.638/74.885	28.309/22.808/34.83	74.885	28.309	-1.3725	961.19	1142.3	1.4633	0.071693	0.92831	0.14339	0.61891	FALSE
NR2C2AP_2	NR2C2AP	111.13/146.58/63.364	85.737/30.791/51.416	111.13	51.416	-1.0971	1769	1723.9	1.463	0.071739	0.92826	0.14348	0.61891	FALSE
ASH2L_5	ASH2L	11.745/64.96/86.406	7.2795/22.808/97.027	64.96	22.808	-1.4701	1645.9	984.94	1.4627	0.071768	0.92823	0.14354	0.61891	FALSE
hsa-mir-6515_4	hsa-mir-6515	117.45/123.26/36.722	55.81/78.689/33.172	117.45	55.81	-1.0601	3275.6	1826.3	1.4625	0.071807	0.92819	0.14361	0.61891	FALSE
CSNK2A2_6	CSNK2A2	16.263/51.635/76.325	16.177/10.264/38.977	51.635	16.177	-1.6156	930.39	775.31	1.4619	0.07188	0.92812	0.14376	0.61891	FALSE
hsa-mir-6859-1_5	hsa-mir-6859-1	84.928/28.316/40.323	11.324/18.247/6.6343	40.323	11.324	-1.7455	1066.9	599.14	1.4618	0.071895	0.9281	0.14379	0.61891	FALSE
OR52B2_15	OR52B2	310.8/121.59/136.81	59.854/136.85/69.66	136.81	69.66	-0.9637	15252	2141.1	1.4616	0.071923	0.92808	0.14385	0.61891	FALSE
DOCK5_6	DOCK5	155.4/129.92/87.126	64.707/90.093/38.147	129.92	64.707	-0.99456	1240.3	2028.8	1.4609	0.072016	0.92798	0.14403	0.61891	FALSE
GART_10	GART	113.84/201.54/97.927	53.383/132.29/37.318	113.84	53.383	-1.0784	3972.5	1767.7	1.4604	0.072086	0.92791	0.14417	0.61891	FALSE
STX4_12	STX4	319.83/243.18/318.98	207.06/233.79/213.96	318.98	213.96	-0.57394	2873.1	5175.6	1.4599	0.072161	0.92784	0.14432	0.61891	FALSE
COPS6_8	COPS6	11.745/108.27/107.29	38.824/137.99/48.928	107.29	48.928	-1.1169	4564.6	1661.8	1.4597	0.072191	0.92781	0.14438	0.61891	FALSE
TCERG1_13	TCERG1	135.52/131.59/148.33	35.589/125.45/68.831	135.52	68.831	-0.9672	89.763	2120.1	1.4593	0.072245	0.92776	0.14449	0.61891	FALSE
CARS_11	CARS	104.8/113.26/56.164	23.456/52.459/47.27	104.8	47.27	-1.1322	1218.7	1621.7	1.4592	0.072252	0.92775	0.1445	0.61891	FALSE
TMEM165_1	TMEM165	94.866/281.49/149.05	63.898/86.672/78.783	149.05	78.783	-0.9113	10238	2341.2	1.4592	0.072261	0.92774	0.14452	0.61891	FALSE
DPAGT1_9	DPAGT1	160.82/24.984/90.006	34.78/37.634/59.709	90.006	37.634	-1.2361	4621.2	1383.7	1.4583	0.072374	0.92763	0.14475	0.61911	FALSE
ANKRD36_14	ANKRD36	34.332/16.656/36.722	0/9.1234/46.44	34.332	9.1234	-1.8033	159.08	506.66	1.4583	0.072374	0.92763	0.14475	0.61911	FALSE
KRTAP13-2_7	KRTAP13-2	140.04/64.96/127.45	63.089/49.038/104.49	127.45	63.089	-1.003	2031.7	1988.6	1.4574	0.0725	0.9275	0.145	0.61911	FALSE
MBTPS2_7	MBTPS2	238.52/321.47/203.05	171.47/116.32/148.44	238.52	148.44	-0.68055	4069	3822.4	1.4573	0.072511	0.92749	0.14502	0.61911	FALSE
EPHA2_8	EPHA2	33.429/14.991/18.001	19.412/3.4213/4.1465	18.001	4.1465	-1.8844	123.54	258.49	1.4573	0.072513	0.92749	0.14503	0.61911	FALSE
OTC_9	OTC	124.68/63.294/107.29	29.118/49.038/78.783	107.29	49.038	-1.1138	1119	1661.8	1.4568	0.072579	0.92742	0.14516	0.61946	FALSE
MEF2B_13	MEF2B	77.7/91.61/148.33	97.869/38.774/32.342	91.61	38.774	-1.2193	1705.3	1409.5	1.4548	0.072858	0.92714	0.14572	0.62118	FALSE
GMPPB_12	GMPPB	86.735/33.313/53.284	0/17.106/18.244	53.284	17.106	-1.584	758.9	801.14	1.4546	0.072894	0.92711	0.14579	0.62128	FALSE
GPR152_6	GPR152	124.68/59.963/108.73	50.148/70.706/46.44	108.73	50.148	-1.1012	1316.2	1685.1	1.4535	0.073038	0.92696	0.14608	0.62196	FALSE
MCCC2_15	MCCC2	143.65/168.23/216.73	66.325/93.515/121.08	168.23	93.515	-0.84037	1478.3	2656.1	1.4534	0.073061	0.92694	0.14612	0.62196	FALSE
OSTC_4	OSTC	27.105/114.93/72.725	7.2795/33.072/27.367	72.725	27.367	-1.378	1931.2	1108	1.4531	0.073099	0.9269	0.1462	0.62196	FALSE
NID1_2	NID1	145.46/79.95/103.69	55.81/46.757/45.611	103.69	46.757	-1.1323	1154.3	1603.7	1.453	0.073113	0.92689	0.14623	0.62196	FALSE
ACO2_8	ACO2	78.603/113.26/95.046	17.794/41.055/85.417	95.046	41.055	-1.1914	301.11	1464.6	1.4529	0.073126	0.92687	0.14625	0.62196	FALSE
NDNL2_11	NDNL2	93.059/111.6/39.603	67.942/36.493/39.806	93.059	39.806	-1.2048	1600.6	1432.7	1.4519	0.073264	0.92674	0.14653	0.62223	FALSE
YME1L1_8	YME1L1	0/48.303/26.642	18.603/3.4213/6.6343	26.642	6.6343	-1.8563	589.5	388.96	1.4517	0.073286	0.92671	0.14657	0.62223	FALSE
POLR2C_6	POLR2C	57.823/58.297/20.881	13.75/19.387/27.367	57.823	19.387	-1.5287	682.46	872.41	1.4517	0.073286	0.92671	0.14657	0.62223	FALSE
COG5_3	COG5	91.252/36.644/75.605	29.118/11.404/69.66	75.605	29.118	-1.3468	881.4	1153.8	1.4502	0.073508	0.92649	0.14702	0.62339	FALSE
GPN3_10	GPN3	0/31.647/66.964	24.265/0/8.2929	31.647	8.2929	-1.8127	1124.4	465.42	1.4499	0.073547	0.92645	0.14709	0.62339	FALSE
MEF2BNB_8	MEF2BNB	251.17/191.55/132.49	135.88/111.76/91.222	191.55	111.76	-0.77194	3521.3	3041.1	1.4485	0.073735	0.92627	0.14747	0.6237	FALSE
C2CD4A_3	C2CD4A	490.59/204.87/337.7	118.09/230.37/272.84	337.7	230.37	-0.54985	20510	5492.7	1.4483	0.073764	0.92624	0.14753	0.6237	FALSE
HYPK_11	HYPK	80.41/0/23.762	0/15.966/5.805	23.762	5.805	-1.8634	1886.8	345.24	1.4476	0.073863	0.92614	0.14773	0.6237	FALSE
GTF3A_15	GTF3A	119.26/153.24/170.65	82.501/74.127/170.83	153.24	82.501	-0.88529	728.87	2409.8	1.4469	0.073965	0.92604	0.14793	0.6237	FALSE
TNFAIP3_2	TNFAIP3	131.91/96.607/83.526	32.353/84.391/42.294	96.607	42.294	-1.1728	708.68	1489.7	1.4467	0.073984	0.92602	0.14797	0.6237	FALSE
NonTargeting_Human_0158	NonTargeting_Human_0158	237.62/118.26/201.61	151.25/119.74/99.515	201.61	119.74	-0.74678	4122	3207.9	1.4467	0.073989	0.92601	0.14798	0.6237	FALSE
NonTargeting_Human_0183	NonTargeting_Human_0183	330.68/248.18/208.09	156.91/133.43/195.71	248.18	156.91	-0.65804	4206.2	3983.9	1.4462	0.074058	0.92594	0.14812	0.6237	FALSE
POLR2L_11	POLR2L	4.5174/68.291/66.244	21.839/23.949/40.635	66.244	23.949	-1.4304	1907.2	1005.3	1.4458	0.074123	0.92588	0.14825	0.6237	FALSE
RNMT_2	RNMT	130.1/63.294/132.49	54.192/95.795/65.514	130.1	65.514	-0.97896	2234.5	2031.8	1.4456	0.07414	0.92586	0.14828	0.6237	FALSE
TPP2_8	TPP2	104.8/68.291/39.603	2.4265/25.089/44.782	68.291	25.089	-1.4092	1078.1	1037.7	1.4452	0.074196	0.9258	0.14839	0.6237	FALSE
DROSHA_2	DROSHA	100.29/41.641/173.53	81.692/35.353/44.782	100.29	44.782	-1.1456	4402.1	1548.9	1.4451	0.074209	0.92579	0.14842	0.6237	FALSE
RPL17_10	RPL17	34.332/109.93/89.286	75.222/37.634/4.9757	89.286	37.634	-1.2246	1723.1	1372.2	1.445	0.074225	0.92577	0.14845	0.6237	FALSE
ERCC3_11	ERCC3	3.6139/63.294/80.645	21.839/41.055/22.391	63.294	22.391	-1.4587	1931.4	958.63	1.4445	0.074293	0.92571	0.14859	0.6237	FALSE
STAG2_13	STAG2	144.56/139.91/69.845	72.795/103.78/57.221	139.91	72.795	-0.93321	2465.6	2191.8	1.4428	0.07454	0.92546	0.14908	0.6237	FALSE
CPSF4_11	CPSF4	409.28/266.5/327.62	247.5/222.38/215.62	327.62	222.38	-0.55691	5201.8	5321.8	1.4426	0.074562	0.92544	0.14912	0.6237	FALSE
EXOC1_14	EXOC1	86.735/64.96/80.645	32.353/26.23/68.002	80.645	32.353	-1.2915	141.56	1234.1	1.4425	0.074575	0.92542	0.14915	0.6237	FALSE
C11orf57_6	C11orf57	28.912/46.638/27.362	0.80884/82.11/7.4636	28.912	7.4636	-1.8214	158.31	423.57	1.4423	0.074603	0.9254	0.14921	0.6237	FALSE
TMEM165_3	TMEM165	164.43/269.83/123.85	67.942/91.234/102.83	164.43	91.234	-0.84289	6378	2593.7	1.4414	0.074737	0.92526	0.14947	0.6237	FALSE
UBE2L3_11	UBE2L3	106.61/51.635/69.125	3.2353/28.511/25.708	69.125	25.708	-1.3926	855.57	1050.9	1.4397	0.074982	0.92502	0.14996	0.62439	FALSE
CHAF1B_5	CHAF1B	41.56/56.632/69.845	16.177/43.336/19.074	56.632	19.074	-1.5216	200.86	853.68	1.4396	0.074995	0.92501	0.14999	0.62439	FALSE
EIF5A_12	EIF5A	269.24/154.9/115.21	84.119/101.5/63.026	154.9	84.119	-0.87311	7324.1	2437.1	1.4394	0.075022	0.92498	0.15004	0.62439	FALSE
SLC7A6OS_15	SLC7A6OS	7.2279/33.313/20.161	4.853/26.23/0	20.161	4.853	-1.8542	170.12	290.9	1.4394	0.075024	0.92498	0.15005	0.62439	FALSE
MGAT1_3	MGAT1	262.01/139.91/95.046	145.59/54.74/72.978	139.91	72.978	-0.92965	8460.4	2191.8	1.4388	0.075099	0.9249	0.1502	0.6248	FALSE
NonTargeting_Human_0836	NonTargeting_Human_0836	63.244/0/49.683	0.80884/33.072/15.757	49.683	15.757	-1.5968	1326.2	744.79	1.4385	0.075145	0.92485	0.15029	0.62497	FALSE
NonTargeting_Human_0870	NonTargeting_Human_0870	171.66/149.91/94.326	89.781/71.847/80.441	149.91	80.441	-0.88983	1781.3	2355.2	1.4379	0.075233	0.92477	0.15047	0.62549	FALSE
TBC1D25_7	TBC1D25	56.016/44.972/25.922	8.0884/13.685/23.22	44.972	13.685	-1.6464	242.44	671.32	1.4366	0.075421	0.92458	0.15084	0.6262	FALSE
ATP5I_7	ATP5I	338.81/196.54/220.33	88.972/221.24/135.17	220.33	135.17	-0.70077	7300.8	3519	1.4362	0.075468	0.92453	0.15094	0.62636	FALSE
MORC3_14	MORC3	3.6139/26.65/23.042	17.794/5.7021/0.82929	23.042	5.7021	-1.8428	195.23	334.34	1.4359	0.075521	0.92448	0.15104	0.62636	FALSE
CPSF2_5	CPSF2	95.769/81.616/27.362	30.736/61.583/33.172	81.616	33.172	-1.2736	1571.9	1249.6	1.4354	0.075588	0.92441	0.15118	0.62637	FALSE
CHMP1A_7	CHMP1A	92.155/38.31/148.33	33.971/42.196/39.806	92.155	39.806	-1.1909	3027.5	1418.2	1.4353	0.075595	0.9244	0.15119	0.62637	FALSE
TAF1_13	TAF1	92.155/136.58/162.01	16.986/70.706/79.612	136.58	70.706	-0.94012	1310.2	2137.4	1.435	0.075645	0.92435	0.15129	0.62657	FALSE
GOLGA6A_4	GOLGA6A	18.973/156.57/113.05	98.678/46.757/53.904	113.05	53.904	-1.0547	5372.1	1754.9	1.434	0.075784	0.92422	0.15157	0.62708	FALSE
GMPPB_13	GMPPB	56.92/154.9/180.01	78.457/84.391/100.34	154.9	84.391	-0.8685	5115.7	2437.1	1.4338	0.075813	0.92419	0.15163	0.62711	FALSE
ELP3_1	ELP3	0.90349/23.319/25.922	4.853/28.511/5.805	23.319	5.805	-1.8374	254.61	338.53	1.4336	0.075845	0.92415	0.15169	0.62716	FALSE
POLR3C_5	POLR3C	2.7105/1.6656/36.002	0/29.651/0.82929	2.7105	0.82929	-1.0203	554.72	35.933	1.4325	0.075996	0.924	0.15199	0.62774	FALSE
PIGS_13	PIGS	230.39/131.59/79.925	93.825/34.213/67.173	131.59	67.173	-0.95965	6215.5	2055.9	1.4325	0.076007	0.92399	0.15201	0.62774	FALSE
NonTargeting_Human_0128	NonTargeting_Human_0128	168.05/203.21/174.25	73.604/99.217/222.25	174.25	99.217	-0.80631	438.46	2755.3	1.4324	0.076017	0.92398	0.15203	0.62774	FALSE
NonTargeting_Human_0126	NonTargeting_Human_0126	108.42/119.93/117.37	126.99/57.021/35.66	117.37	57.021	-1.0286	43.318	1824.9	1.4318	0.076105	0.9239	0.15221	0.62783	FALSE
PQBP1_15	PQBP1	285.5/193.21/154.81	114.05/184.75/109.47	193.21	114.05	-0.75543	4995.9	3068.6	1.4307	0.076257	0.92374	0.15251	0.62844	FALSE
SRP14_11	SRP14	349.65/128.25/207.37	245.89/107.2/125.22	207.37	125.22	-0.7232	13251	3303.5	1.4303	0.076315	0.92368	0.15263	0.62871	FALSE
SSR2_9	SSR2	75.893/211.54/213.85	220.81/84.391/128.54	211.54	128.54	-0.7143	9202.1	3372.6	1.43	0.07636	0.92364	0.15272	0.62886	FALSE
SERPINA1_14	SERPINA1	198.77/33.313/124.57	62.28/90.093/44.782	124.57	62.28	-0.98864	6916.5	1941.8	1.4285	0.07658	0.92342	0.15316	0.63025	FALSE
FUNDC2_10	FUNDC2	168.95/239.85/198.73	116.47/157.38/118.59	198.73	118.59	-0.73999	1288.8	3160.1	1.427	0.076791	0.92321	0.15358	0.63135	FALSE
MBTPS2_3	MBTPS2	9.9383/39.975/18.721	15.368/4.5617/2.4879	18.721	4.5617	-1.8262	264.43	269.27	1.4262	0.076903	0.9231	0.15381	0.63142	FALSE
PHKG2_8	PHKG2	590.88/428.07/419.07	509.57/269.14/308.5	428.07	308.5	-0.47128	13294	7033.3	1.4258	0.076968	0.92303	0.15394	0.63147	FALSE
KRTAP4-2_11	KRTAP4-2	65.051/123.26/110.17	49.339/153.96/52.245	110.17	52.245	-1.062	1103.4	1708.3	1.4255	0.077001	0.923	0.154	0.63147	FALSE
MCCC2_5	MCCC2	75.893/208.2/167.77	212.72/94.655/68.831	167.77	94.655	-0.81916	5038.2	2648.6	1.4243	0.077186	0.92281	0.15437	0.63189	FALSE
AGAP4_7	AGAP4	256.59/186.55/131.05	109.19/111.76/106.98	186.55	109.19	-0.76725	3993	2958.4	1.4242	0.077197	0.9228	0.15439	0.63189	FALSE
GPN1_8	GPN1	68.665/53.3/82.805	25.883/12.545/32.342	68.665	25.883	-1.3738	218.01	1043.6	1.424	0.07722	0.92278	0.15444	0.63189	FALSE
TM9SF2_8	TM9SF2	278.27/398.09/347.78	253.97/240.63/174.15	347.78	240.63	-0.52954	3681	5663.8	1.4238	0.077247	0.92275	0.15449	0.6319	FALSE
GPN2_2	GPN2	58.727/81.616/19.441	0/20.528/54.733	58.727	20.528	-1.4722	1033.6	886.63	1.4231	0.077359	0.92264	0.15472	0.63239	FALSE
C19orf52_11	C19orf52	1.807/16.656/36.722	4.0442/18.247/0	16.656	4.0442	-1.8075	311.58	238.39	1.4218	0.077547	0.92245	0.15509	0.63267	FALSE
NIPSNAP1_6	NIPSNAP1	252.07/101.6/112.33	76.839/41.055/53.904	112.33	53.904	-1.0455	9821.8	1743.3	1.4216	0.077572	0.92243	0.15514	0.63267	FALSE
TAF1_7	TAF1	70.472/3.3313/36.002	2.4265/10.264/12.439	36.002	10.264	-1.7159	1127.8	532.38	1.4215	0.07758	0.92242	0.15516	0.63267	FALSE
NonTargeting_Human_0733	NonTargeting_Human_0733	174.37/139.91/35.282	66.325/204.14/73.807	139.91	73.807	-0.91356	6067.5	2191.8	1.4209	0.077678	0.92232	0.15536	0.63267	FALSE
ATP13A1_7	ATP13A1	312.61/114.93/314.66	359.93/198.43/211.47	312.61	211.47	-0.5617	19540	5067.8	1.4207	0.077698	0.9223	0.1554	0.63267	FALSE
YPEL1_10	YPEL1	215.03/149.91/61.924	74.413/84.391/81.271	149.91	81.271	-0.87521	5991	2355.2	1.4206	0.077713	0.92229	0.15543	0.63267	FALSE
PFDN2_14	PFDN2	131.91/119.93/50.403	29.118/59.302/74.636	119.93	59.302	-1.0038	2488.5	1866.4	1.4205	0.07773	0.92227	0.15546	0.63267	FALSE
CDC73_15	CDC73	74.989/56.632/76.325	17.794/29.651/31.513	74.989	29.651	-1.3099	169.4	1144	1.4202	0.077774	0.92223	0.15555	0.63267	FALSE
AIM1_1	AIM1	199.67/163.23/137.53	91.398/184.75/80.441	163.23	91.398	-0.8298	994.19	2573.9	1.42	0.077807	0.92219	0.15561	0.63267	FALSE
WDR18_6	WDR18	45.174/183.22/118.09	61.472/37.634/58.05	118.09	58.05	-1.012	4779.3	1836.6	1.4192	0.077915	0.92209	0.15583	0.63316	FALSE
ZNHIT1_5	ZNHIT1	215.93/188.22/246.26	97.06/167.64/132.69	215.93	132.69	-0.69839	843.85	3445.8	1.4189	0.077965	0.92203	0.15593	0.63316	FALSE
SUSD5_9	SUSD5	315.32/133.25/188.65	160.96/101.5/111.13	188.65	111.13	-0.75825	9556.5	2993.2	1.4189	0.077971	0.92203	0.15594	0.63316	FALSE
STRAP_6	STRAP	112.94/228.19/247.7	322.73/142.55/121.08	228.19	142.55	-0.67497	6832.2	3650	1.418	0.078093	0.92191	0.15619	0.63369	FALSE
NonTargeting_Human_0818	NonTargeting_Human_0818	135.52/123.26/212.41	370.45/70.706/54.733	135.52	70.706	-0.92897	3031.4	2120.1	1.4179	0.078115	0.92189	0.15623	0.63369	FALSE
DNASE2_4	DNASE2	115.65/139.91/91.446	75.222/46.757/56.392	115.65	56.392	-1.0232	587.27	1797	1.4176	0.07815	0.92185	0.1563	0.63377	FALSE
C1GALT1_14	C1GALT1	168.05/224.86/198.01	336.48/106.06/118.59	198.01	118.59	-0.73478	809.34	3148.2	1.4169	0.078261	0.92174	0.15652	0.63397	FALSE
WARS_10	WARS	84.928/71.622/80.645	0/74.127/33.172	80.645	33.172	-1.2566	49.877	1234.1	1.4167	0.078285	0.92171	0.15657	0.63397	FALSE
CPSF3L_13	CPSF3L	0/13.325/42.483	3.2353/5.7021/0	13.325	3.2353	-1.758	513.87	188.92	1.4166	0.078305	0.9217	0.15661	0.63397	FALSE
RBM14_10	RBM14	46.078/34.978/51.123	14.559/21.668/4.9757	46.078	14.559	-1.5973	74.328	688.53	1.4159	0.078399	0.9216	0.1568	0.63425	FALSE
ASB16_11	ASB16	51.499/86.613/56.164	65.516/19.387/19.074	56.164	19.387	-1.4874	474.46	846.33	1.4158	0.078418	0.92158	0.15684	0.63425	FALSE
HNRNPA2B1_6	HNRNPA2B1	80.41/104.93/113.77	60.663/49.038/32.342	104.93	49.038	-1.0821	339.74	1623.8	1.4155	0.078456	0.92154	0.15691	0.63432	FALSE
WDR82_13	WDR82	203.28/61.628/101.53	66.325/46.757/38.977	101.53	46.757	-1.1022	5973.2	1568.9	1.4146	0.078593	0.92141	0.15719	0.63483	FALSE
POLR2E_10	POLR2E	10.842/59.963/46.803	4.853/28.511/14.927	46.803	14.927	-1.5856	733.2	699.84	1.4138	0.078709	0.92129	0.15742	0.63528	FALSE
STARD4_11	STARD4	133.72/141.58/120.97	80.884/69.566/38.977	133.72	69.566	-0.93288	112.17	2090.7	1.4137	0.07872	0.92128	0.15744	0.63528	FALSE
CHD7_7	CHD7	22.587/83.282/72.725	40.442/28.511/24.049	72.725	28.511	-1.3209	1312.6	1108	1.4137	0.078726	0.92127	0.15745	0.63528	FALSE
C21orf59_14	C21orf59	68.665/63.294/102.97	47.721/26.23/9.1222	68.665	26.23	-1.3553	602.74	1043.6	1.4115	0.079046	0.92095	0.15809	0.6368	FALSE
FAM57B_15	FAM57B	155.4/146.58/141.85	79.266/35.353/142.64	146.58	79.266	-0.8786	50.098	2300.7	1.4103	0.079231	0.92077	0.15846	0.63746	FALSE
STAG2_14	STAG2	65.954/86.613/70.565	17.794/27.37/63.026	70.565	27.37	-1.3349	139.4	1073.7	1.4097	0.079316	0.92068	0.15863	0.63792	FALSE
DHRSX_6	DHRSX	199.67/153.24/91.446	6.4707/84.391/97.027	153.24	84.391	-0.853	2987.1	2409.8	1.408	0.07956	0.92044	0.15912	0.63837	FALSE
MSTO1_1	MSTO1	125.58/138.25/68.405	63.898/51.319/93.71	125.58	63.898	-0.96385	1714.9	1958.3	1.4079	0.079574	0.92043	0.15915	0.63837	FALSE
S100A14_15	S100A14	70.472/59.963/71.285	11.324/82.11/27.367	70.472	27.367	-1.3332	55.551	1072.2	1.4079	0.079576	0.92042	0.15915	0.63837	FALSE
PITPNM2_5	PITPNM2	145.46/58.297/107.29	50.957/174.48/19.074	107.29	50.957	-1.0595	1928.6	1661.8	1.4077	0.079604	0.9204	0.15921	0.63837	FALSE
DCAKD_4	DCAKD	266.53/191.55/135.37	114.05/104.92/175.81	191.55	114.05	-0.74301	4389.1	3041.1	1.407	0.079715	0.92029	0.15943	0.63858	FALSE
VPS72_2	VPS72	171.66/198.21/174.97	101.1/100.36/211.47	174.97	101.1	-0.7853	275.49	2767.2	1.4069	0.079724	0.92028	0.15945	0.63858	FALSE
CCT8_11	CCT8	60.534/48.303/46.083	3.2353/74.127/15.757	48.303	15.757	-1.557	77.253	723.24	1.4068	0.079748	0.92025	0.1595	0.63858	FALSE
CAPZB_2	CAPZB	25.298/16.656/3.6002	34.78/0/4.1465	16.656	4.1465	-1.7785	122.57	238.39	1.4067	0.079755	0.92024	0.15951	0.63858	FALSE
KCTD5_2	KCTD5	309.9/68.291/123.85	67.942/62.723/48.928	123.85	62.723	-0.97029	18850	1930.1	1.4061	0.079845	0.92015	0.15969	0.63858	FALSE
UVRAG_3	UVRAG	220.45/151.57/177.13	135.88/76.408/102.83	177.13	102.83	-0.77869	1264.9	2802.8	1.406	0.079868	0.92013	0.15974	0.63858	FALSE
GPN2_11	GPN2	0/36.644/36.002	10.515/28.511/6.6343	36.002	10.515	-1.6841	648.29	532.38	1.4046	0.080072	0.91993	0.16014	0.63879	FALSE
MAOB_6	MAOB	0/153.24/106.57	0.80884/131.15/50.587	106.57	50.587	-1.0602	6767.4	1650.2	1.4045	0.080086	0.91991	0.16017	0.63879	FALSE
GP1BB_10	GP1BB	78.603/151.57/209.53	83.31/82.11/102	151.57	83.31	-0.85572	4342	2382.5	1.4044	0.080107	0.91989	0.16021	0.63879	FALSE
TNFAIP3_8	TNFAIP3	40.657/73.288/140.41	29.118/14.825/79.612	73.288	29.118	-1.3025	2785	1116.9	1.4043	0.080121	0.91988	0.16024	0.63879	FALSE
NELFA_4	NELFA	103/86.613/66.244	46.104/34.213/37.318	86.613	37.318	-1.1931	341.66	1329.4	1.4042	0.080129	0.91987	0.16026	0.63879	FALSE
KMT2D_7	KMT2D	29.815/51.635/56.884	16.177/44.476/17.415	51.635	17.415	-1.5151	251.82	775.31	1.4033	0.080259	0.91974	0.16052	0.63956	FALSE
ALG13_3	ALG13	162.63/78.285/105.85	50.148/87.812/46.44	105.85	50.148	-1.0628	1991.8	1638.5	1.403	0.080306	0.91969	0.16061	0.63956	FALSE
MTFP1_13	MTFP1	350.55/113.26/235.46	456.18/149.4/82.929	235.46	149.4	-0.65281	14089	3771.2	1.4018	0.080488	0.91951	0.16098	0.64059	FALSE
PFDN2_8	PFDN2	119.26/86.613/100.81	27.5/46.757/56.392	100.81	46.757	-1.092	270.99	1557.3	1.4016	0.08051	0.91949	0.16102	0.64059	FALSE
ISG15_12	ISG15	211.42/183.22/109.45	89.781/136.85/107.81	183.22	107.81	-0.75964	3118.7	2903.3	1.4016	0.080514	0.91949	0.16103	0.64059	FALSE
NonTargeting_Human_0344	NonTargeting_Human_0344	199.67/94.941/170.65	66.325/98.076/122.74	170.65	98.076	-0.79287	3287.1	2696	1.4009	0.080629	0.91937	0.16126	0.64091	FALSE
KLHL20_9	KLHL20	262.91/238.19/136.81	371.26/151.68/68.831	238.19	151.68	-0.64766	5444.3	3816.8	1.4006	0.080662	0.91934	0.16132	0.64091	FALSE
METAP1_2	METAP1	177.99/143.24/184.33	61.472/103.78/158.39	177.99	103.78	-0.77251	623.64	2816.9	1.4006	0.080662	0.91934	0.16132	0.64091	FALSE
TBX6_6	TBX6	174.37/163.23/133.21	44.486/92.374/179.13	163.23	92.374	-0.81464	512.75	2573.9	1.4006	0.080663	0.91934	0.16133	0.64091	FALSE
ST6GAL1_10	ST6GAL1	51.499/39.975/51.843	0/54.74/17.415	51.499	17.415	-1.5114	66.455	773.18	1.4002	0.08072	0.91928	0.16144	0.64098	FALSE
OSTC_1	OSTC	116.55/176.56/246.26	102.72/133.43/93.71	176.56	102.72	-0.77556	4229.4	2793.4	1.3996	0.080821	0.91918	0.16164	0.64138	FALSE
UBA2_10	UBA2	7.2279/164.9/193.69	46.912/110.62/93.71	164.9	93.71	-0.80871	12844	2601.3	1.3995	0.080831	0.91917	0.16166	0.64138	FALSE
BTF3_7	BTF3	28.008/61.628/64.804	22.647/12.545/65.514	61.628	22.647	-1.4051	570.21	932.35	1.3994	0.080849	0.91915	0.1617	0.64138	FALSE
NonTargeting_Human_0351	NonTargeting_Human_0351	78.603/108.27/107.29	6.4707/51.319/160.88	107.29	51.319	-1.0495	411.86	1661.8	1.3985	0.080983	0.91902	0.16197	0.6414	FALSE
CMAS_1	CMAS	239.42/173.23/226.82	123.75/272.56/142.64	226.82	142.64	-0.66543	1515.4	3627	1.3982	0.081023	0.91898	0.16205	0.64151	FALSE
UBE2Q1_2	UBE2Q1	285.5/194.88/278.66	200.59/179.05/184.93	278.66	184.93	-0.58889	3532.9	4495.3	1.398	0.081054	0.91895	0.16211	0.64154	FALSE
STXBP5L_5	STXBP5L	65.954/88.279/57.604	25.074/128.87/23.22	65.954	25.074	-1.3606	284.05	1000.7	1.3978	0.08109	0.91891	0.16218	0.64162	FALSE
POLRMT_9	POLRMT	42.464/251.51/230.42	145.59/130.01/203.18	230.42	145.59	-0.65869	17885	3687.1	1.3974	0.081145	0.91885	0.16229	0.64168	FALSE
NonTargeting_Human_0798	NonTargeting_Human_0798	276.47/236.52/77.765	116.47/150.54/151.76	236.52	150.54	-0.64839	13399	3789	1.3973	0.081169	0.91883	0.16234	0.64168	FALSE
MED27_8	MED27	224.06/131.59/125.29	68.751/68.425/90.393	131.59	68.751	-0.92663	4296	2055.9	1.397	0.081206	0.91879	0.16241	0.64168	FALSE
GPN1_13	GPN1	82.217/51.635/111.61	34.78/21.668/43.952	82.217	34.78	-1.2177	899.54	1259.1	1.3969	0.081217	0.91878	0.16243	0.64168	FALSE
GPN2_4	GPN2	0/124.92/138.97	63.898/65.004/29.025	124.92	63.898	-0.95629	7901.5	1947.5	1.3969	0.081228	0.91877	0.16246	0.64168	FALSE
ZNF764_13	ZNF764	83.121/168.23/121.69	37.206/61.583/126.05	121.69	61.583	-0.97116	1826.7	1895	1.3964	0.081299	0.9187	0.1626	0.64174	FALSE
MEF2B_5	MEF2B	40.657/94.941/30.242	1.6177/12.545/38.977	40.657	12.545	-1.6208	1527.6	604.31	1.3963	0.081314	0.91869	0.16263	0.64174	FALSE
CTCF_1	CTCF	159.01/144.91/60.484	72.795/78.689/106.98	144.91	78.689	-0.87263	3663.3	2273.4	1.396	0.081351	0.91865	0.1627	0.64175	FALSE
SAP130_6	SAP130	95.769/126.59/118.09	59.045/107.2/40.635	118.09	59.045	-0.98791	285.18	1836.6	1.3954	0.081452	0.91855	0.1629	0.64175	FALSE
TRIAP1_8	TRIAP1	23.491/78.285/68.405	38.824/1.1404/26.537	68.405	26.537	-1.3336	1057.4	1039.5	1.3951	0.081491	0.91851	0.16298	0.64175	FALSE
OR56A1_9	OR56A1	234/148.24/89.286	248.31/23.949/81.271	148.24	81.271	-0.8592	5415.4	2328	1.3945	0.08159	0.91841	0.16318	0.64225	FALSE
PAM16_11	PAM16	171.66/164.9/175.69	114.05/99.217/47.27	171.66	99.217	-0.78483	30.998	2712.7	1.3939	0.081669	0.91833	0.16334	0.64266	FALSE
UBE2Q1_14	UBE2Q1	262.01/98.272/140.41	156.91/58.161/75.465	140.41	75.465	-0.887	8281.2	2199.9	1.393	0.081815	0.91819	0.16363	0.6434	FALSE
NonTargeting_Human_0031	NonTargeting_Human_0031	139.14/108.27/87.126	48.53/54.74/52.245	108.27	52.245	-1.0371	699.95	1677.6	1.3922	0.081928	0.91807	0.16386	0.64366	FALSE
SULT1A2_8	SULT1A2	6.3244/118.26/93.606	37.206/58.161/42.294	93.606	42.294	-1.1278	4113	1441.5	1.3918	0.081987	0.91801	0.16397	0.64371	FALSE
NonTargeting_Human_0541	NonTargeting_Human_0541	332.48/204.87/195.85	207.06/125.45/118.59	204.87	125.45	-0.70323	8182.8	3262	1.3917	0.082008	0.91799	0.16402	0.64371	FALSE
RANBP1_12	RANBP1	93.059/214.87/250.58	72.795/133.43/191.57	214.87	133.43	-0.68329	8056.2	3428	1.3917	0.082014	0.91799	0.16403	0.64371	FALSE
NonTargeting_Human_0119	NonTargeting_Human_0119	359.59/406.41/290.9	253.17/282.82/191.57	359.59	253.17	-0.50458	3455.4	5864.3	1.3897	0.082309	0.91769	0.16462	0.64491	FALSE
BAGE2_10	BAGE2	83.121/113.26/46.803	35.589/91.234/26.537	83.121	35.589	-1.2011	1113.8	1273.6	1.3895	0.082338	0.91766	0.16468	0.64491	FALSE
GNB1L_13	GNB1L	45.174/141.58/97.206	44.486/103.78/44.782	97.206	44.782	-1.101	2338.1	1499.3	1.3894	0.082352	0.91765	0.1647	0.64491	FALSE
CTIF_14	CTIF	236.71/151.57/170.65	119.71/77.549/98.686	170.65	98.686	-0.78402	2364.1	2696	1.3891	0.082407	0.91759	0.16481	0.64491	FALSE
NonTargeting_Human_0111	NonTargeting_Human_0111	261.11/264.84/309.62	180.37/161.94/174.15	264.84	174.15	-0.60193	1009.8	4263.1	1.3891	0.082408	0.91759	0.16482	0.64491	FALSE
PPIAL4A_3	PPIAL4A	74.989/36.644/64.084	24.265/7.9829/69.66	64.084	24.265	-1.3652	435.95	971.11	1.3889	0.08243	0.91757	0.16486	0.64491	FALSE
SULT1A2_3	SULT1A2	29.815/93.275/135.37	8.8972/42.196/44.782	93.275	42.196	-1.126	2899.5	1436.2	1.3884	0.082501	0.9175	0.165	0.64503	FALSE
PRMT1_1	PRMT1	88.542/93.275/126.73	14.559/42.196/66.343	93.275	42.196	-1.126	570.76	1436.2	1.3884	0.082501	0.9175	0.165	0.64503	FALSE
S100A10_4	S100A10	93.059/79.95/117.37	42.059/34.213/96.198	93.059	42.059	-1.1272	381.38	1432.7	1.3882	0.082532	0.91747	0.16506	0.64503	FALSE
RALB_13	RALB	13.552/91.61/40.323	46.912/12.545/0	40.323	12.545	-1.6092	1673.5	599.14	1.3879	0.082584	0.91742	0.16517	0.64503	FALSE
ITGA1_14	ITGA1	97.576/94.941/22.321	15.368/43.336/55.563	94.941	43.336	-1.1137	2640.3	1462.9	1.3875	0.082646	0.91735	0.16529	0.64503	FALSE
TNFRSF8_4	TNFRSF8	127.39/173.23/57.604	40.442/66.144/73.807	127.39	66.144	-0.93521	3485.6	1987.7	1.3865	0.082798	0.9172	0.1656	0.64503	FALSE
C2orf49_9	C2orf49	292.73/191.55/159.13	156.11/115.18/82.1	191.55	115.18	-0.72882	5644.3	3041.1	1.3863	0.082823	0.91718	0.16565	0.64503	FALSE
C21orf59_10	C21orf59	0/31.647/61.924	45.295/6.8425/9.1222	31.647	9.1222	-1.6894	959.12	465.42	1.3856	0.082929	0.91707	0.16586	0.64503	FALSE
SLC4A1AP_12	SLC4A1AP	79.507/179.89/267.14	200.59/106.06/99.515	179.89	106.06	-0.75669	8844.5	2848.3	1.3856	0.082934	0.91707	0.16587	0.64503	FALSE
NonTargeting_Human_0764	NonTargeting_Human_0764	449.94/438.06/272.18	591.26/320.46/273.67	438.06	320.46	-0.44979	13829	7204.6	1.3855	0.082946	0.91705	0.16589	0.64503	FALSE
SNX1_5	SNX1	224.06/201.54/164.17	71.986/123.17/179.96	201.54	123.17	-0.70595	951.92	3206.7	1.3852	0.082999	0.917	0.166	0.64503	FALSE
TBX1_11	TBX1	217.74/56.632/90.726	149.63/27.37/40.635	90.726	40.635	-1.1395	8647.5	1395.3	1.3851	0.083017	0.91698	0.16603	0.64503	FALSE
MARS2_4	MARS2	158.11/69.957/157.69	80.075/88.953/244.64	157.69	88.953	-0.81897	3848.7	2482.9	1.3841	0.083161	0.91684	0.16632	0.64546	FALSE
RAB13_13	RAB13	354.17/184.89/289.46	194.93/150.54/232.2	289.46	194.93	-0.568	7561.4	4677.2	1.3823	0.083441	0.91656	0.16688	0.64618	FALSE
BRICD5_2	BRICD5	365.01/348.12/274.34	321.92/244.05/225.57	348.12	244.05	-0.51063	2864.3	5669.4	1.3821	0.083467	0.91653	0.16693	0.64618	FALSE
TMEM18_9	TMEM18	139.14/76.619/121.69	82.501/60.442/62.197	121.69	62.197	-0.95707	1167.8	1895	1.3819	0.083496	0.9165	0.16699	0.6462	FALSE
EXOC8_11	EXOC8	160.82/196.54/218.17	73.604/201.85/119.42	196.54	119.42	-0.71413	872.04	3123.8	1.3812	0.083601	0.9164	0.1672	0.64644	FALSE
KIAA1432_10	KIAA1432	122.87/43.306/147.61	63.089/27.37/87.076	122.87	63.089	-0.95072	3471.4	1914.2	1.3811	0.083618	0.91638	0.16724	0.64644	FALSE
KAT7_8	KAT7	157.21/163.23/94.326	181.18/50.179/88.734	157.21	88.734	-0.81808	1995.1	2474.9	1.3811	0.083632	0.91637	0.16726	0.64644	FALSE
PRELP_10	PRELP	76.796/68.291/95.766	1.6177/31.932/43.952	76.796	31.932	-1.2402	216.1	1172.7	1.3809	0.083661	0.91634	0.16732	0.64646	FALSE
PON1_13	PON1	111.13/186.55/77.045	180.37/49.038/54.733	111.13	54.733	-1.0085	3425.1	1723.9	1.3801	0.083779	0.91622	0.16756	0.64683	FALSE
DCPS_13	DCPS	149.98/114.93/83.526	57.427/79.829/34.001	114.93	57.427	-0.98852	1107.3	1785.4	1.38	0.083788	0.91621	0.16758	0.64683	FALSE
TMEM221_13	TMEM221	244.84/184.89/161.29	153.68/108.34/110.3	184.89	110.3	-0.74001	2075.9	2930.9	1.3797	0.083843	0.91616	0.16769	0.64705	FALSE
MKL1_10	MKL1	183.41/73.288/134.65	197.36/71.847/50.587	134.65	71.847	-0.89695	3071.3	2105.9	1.3784	0.084038	0.91596	0.16808	0.64835	FALSE
USO1_6	USO1	99.383/44.972/47.523	59.854/15.966/0	47.523	15.966	-1.516	1348	711.06	1.378	0.0841	0.9159	0.1682	0.64841	FALSE
HIST2H3A_6	HIST2H3A	30.718/76.619/110.17	1.6177/31.932/93.71	76.619	31.932	-1.2369	1616.2	1169.9	1.3773	0.084204	0.9158	0.16841	0.64893	FALSE
PRR3_11	PRR3	280.98/316.47/218.17	173.9/295.37/188.25	280.98	188.25	-0.57533	2602.2	4534.5	1.3772	0.08422	0.91578	0.16844	0.64893	FALSE
CABIN1_7	CABIN1	109.32/99.938/111.61	107.58/53.6/33.172	109.32	53.6	-1.0147	46.639	1694.7	1.3766	0.084311	0.91569	0.16862	0.64929	FALSE
NonTargeting_Human_0695	NonTargeting_Human_0695	217.74/146.58/110.89	80.884/65.004/155.08	146.58	80.884	-0.84981	3169	2300.7	1.3762	0.084384	0.91562	0.16877	0.64929	FALSE
GTF3A_5	GTF3A	193.35/36.644/84.966	37.206/29.651/43.123	84.966	37.206	-1.1699	7040.6	1303.1	1.3761	0.084402	0.9156	0.1688	0.64929	FALSE
RBBP5_15	RBBP5	21.684/73.288/38.883	12.133/31.932/0	38.883	12.133	-1.6026	739.76	576.85	1.376	0.084408	0.91559	0.16882	0.64929	FALSE
BST2_15	BST2	186.12/224.86/204.49	96.251/166.5/126.05	204.49	126.05	-0.69367	376.24	3255.7	1.3758	0.084449	0.91555	0.1689	0.64929	FALSE
MAP1S_2	MAP1S	74.989/26.65/20.161	7.2795/39.915/7.4636	26.65	7.4636	-1.7079	1189.4	389.09	1.3756	0.08448	0.91552	0.16896	0.64929	FALSE
GMPPB_8	GMPPB	196.96/58.297/137.53	45.295/74.127/87.905	137.53	74.127	-0.88278	4904.9	2152.9	1.3754	0.084509	0.91549	0.16902	0.64929	FALSE
PIK3R4_10	PIK3R4	108.42/83.282/120.97	31.545/62.723/53.075	108.42	53.075	-1.0168	394.67	1680.1	1.3739	0.084735	0.91526	0.16947	0.65064	FALSE
DHDDS_11	DHDDS	131.01/78.285/22.321	4.0442/33.072/51.416	78.285	33.072	-1.2184	2955.7	1196.4	1.3736	0.084777	0.91522	0.16955	0.65072	FALSE
ATP11A_7	ATP11A	183.41/174.89/223.21	97.06/145.97/109.47	183.41	109.47	-0.73929	828.57	2906.4	1.3735	0.084799	0.9152	0.1696	0.65072	FALSE
hsa-mir-6886_10	hsa-mir-6886	207.8/336.46/413.31	229.71/234.93/240.49	336.46	234.93	-0.51637	11229	5471.6	1.3726	0.084937	0.91506	0.16987	0.65134	FALSE
RANBP1_2	RANBP1	185.21/159.9/77.765	96.251/82.11/91.222	159.9	91.222	-0.80299	3693.5	2519.2	1.3726	0.084943	0.91506	0.16989	0.65134	FALSE
ERCC3_15	ERCC3	120.16/4.9969/17.281	0/4.5617/68.831	17.281	4.5617	-1.7168	5367.8	247.72	1.3725	0.08496	0.91504	0.16992	0.65134	FALSE
HNF4A_3	HNF4A	299.05/156.57/154.81	107.58/29.651/88.734	156.57	88.734	-0.81226	10152	2464.5	1.3712	0.085162	0.91484	0.17032	0.65187	FALSE
RCC1_1	RCC1	166.24/79.95/174.97	39.633/115.18/96.198	166.24	96.198	-0.78294	3761.2	2623.4	1.371	0.085194	0.91481	0.17039	0.65191	FALSE
METTL14_2	METTL14	17.166/56.632/36.722	11.324/88.953/4.1465	36.722	11.324	-1.614	389.41	543.48	1.3704	0.08528	0.91472	0.17056	0.65211	FALSE
DNAJC17_2	DNAJC17	153.59/79.95/30.242	41.251/34.213/28.196	79.95	34.213	-1.2009	3947	1223	1.3704	0.085285	0.91471	0.17057	0.65211	FALSE
MRPL33_1	MRPL33	11.745/151.57/131.05	69.56/43.336/184.93	131.05	69.56	-0.90415	7327.3	2047.2	1.37	0.085348	0.91465	0.1707	0.65211	FALSE
CHD7_10	CHD7	112.03/189.88/133.21	71.178/10.264/83.758	133.21	71.178	-0.89486	1830.2	2082.4	1.3696	0.085414	0.91459	0.17083	0.65211	FALSE
TPP2_3	TPP2	134.62/43.306/74.165	41.251/11.404/30.684	74.165	30.684	-1.2463	2303.5	1130.9	1.3692	0.085467	0.91453	0.17093	0.65211	FALSE
EXOC4_5	EXOC4	68.665/36.644/3.6002	11.324/37.634/10.781	36.644	11.324	-1.611	1058.6	542.27	1.3683	0.085603	0.9144	0.17121	0.65211	FALSE
MED27_12	MED27	211.42/293.15/264.98	173.09/175.62/184.93	264.98	175.62	-0.59062	1831.3	4265.5	1.3683	0.085614	0.91439	0.17123	0.65211	FALSE
SUMO2_2	SUMO2	272.85/319.8/596.92	341.33/221.24/206.49	319.8	221.24	-0.52955	39499	5189.5	1.3682	0.085626	0.91437	0.17125	0.65211	FALSE
NonTargeting_Human_0724	NonTargeting_Human_0724	36.139/8.3282/20.881	5.6618/15.966/2.4879	20.881	5.6618	-1.7157	195.2	301.73	1.3682	0.085627	0.91437	0.17125	0.65211	FALSE
NCBP1_11	NCBP1	17.166/23.319/10.081	12.941/4.5617/0	17.166	4.5617	-1.7077	44.03	246	1.368	0.085655	0.91435	0.17131	0.65211	FALSE
OR5AR1_2	OR5AR1	240.33/223.19/169.93	141.55/233.79/102.83	223.19	141.55	-0.65332	1565.3	3566.7	1.3677	0.085704	0.9143	0.17141	0.65211	FALSE
USP50_10	USP50	224.06/168.23/213.13	133.46/123.17/174.98	213.13	133.46	-0.67136	1068	3399.2	1.3673	0.085759	0.91424	0.17152	0.65211	FALSE
LSM2_8	LSM2	214.13/216.53/88.566	134.27/71.847/180.79	214.13	134.27	-0.66938	7885.6	3415.7	1.3671	0.085789	0.91421	0.17158	0.65211	FALSE
RAB23_10	RAB23	0/16.656/12.961	26.692/3.4213/0	12.961	3.4213	-1.6589	90.82	183.54	1.3668	0.085846	0.91415	0.17169	0.65211	FALSE
EPN1_13	EPN1	234.91/173.23/139.69	101.91/84.391/209.81	173.23	101.91	-0.75953	2464.6	2738.4	1.3655	0.086055	0.91395	0.17211	0.65234	FALSE
CSNK2A2_4	CSNK2A2	154.5/23.319/24.482	3.2353/6.8425/51.416	24.482	6.8425	-1.7001	8452.5	356.15	1.3653	0.086079	0.91392	0.17216	0.65234	FALSE
EIF2S2_9	EIF2S2	0/83.282/24.482	0/6.8425/58.88	24.482	6.8425	-1.7001	2028.4	356.15	1.3653	0.086079	0.91392	0.17216	0.65234	FALSE
TSPAN11_14	TSPAN11	317.12/229.86/167.05	101.1/147.11/188.25	229.86	147.11	-0.64029	5780	3677.7	1.3648	0.086153	0.91385	0.17231	0.65269	FALSE
LGR5_14	LGR5	74.086/103.27/41.763	29.927/30.791/73.807	74.086	30.791	-1.2399	948.23	1129.6	1.364	0.086281	0.91372	0.17256	0.65304	FALSE
SMC1A_14	SMC1A	22.587/98.272/107.29	85.737/25.089/46.44	98.272	46.44	-1.0653	2904.8	1516.5	1.364	0.086287	0.91371	0.17257	0.65304	FALSE
INTS8_2	INTS8	9.9383/41.641/20.881	6.4707/5.7021/1.6586	20.881	5.7021	-1.707	275.35	301.73	1.3636	0.08634	0.91366	0.17268	0.65304	FALSE
INTS8_5	INTS8	124.68/68.291/40.323	42.059/27.37/25.708	68.291	27.37	-1.2883	1981	1037.7	1.3629	0.08645	0.91355	0.1729	0.65315	FALSE
SRP9_5	SRP9	141.85/143.24/70.565	42.059/100.36/77.953	141.85	77.953	-0.8554	2541.6	2223.4	1.3626	0.086502	0.9135	0.173	0.65316	FALSE
NonTargeting_Human_0877	NonTargeting_Human_0877	156.3/104.93/186.49	200.59/88.953/63.026	156.3	88.953	-0.8063	1775	2460.1	1.3626	0.086508	0.91349	0.17302	0.65316	FALSE
DNAL4_7	DNAL4	20.78/136.58/118.09	79.266/60.442/43.952	118.09	60.442	-0.95472	4905.4	1836.6	1.3619	0.086617	0.91338	0.17323	0.65331	FALSE
PLA2G10_10	PLA2G10	83.121/96.607/62.644	31.545/36.493/60.538	83.121	36.493	-1.1658	300.58	1273.6	1.3619	0.086617	0.91338	0.17323	0.65331	FALSE
MRPL33_11	MRPL33	81.314/96.607/77.765	12.133/35.353/60.538	81.314	35.353	-1.1791	123.23	1244.7	1.3616	0.086664	0.91334	0.17333	0.65331	FALSE
MOCS3_12	MOCS3	165.34/166.56/198.73	201.4/96.936/72.148	166.56	96.936	-0.7748	518.2	2628.7	1.3614	0.086697	0.9133	0.17339	0.65331	FALSE
CDC23_9	CDC23	10.842/26.65/18.001	4.853/4.5617/5.805	18.001	4.853	-1.6988	63.03	258.49	1.3614	0.0867	0.9133	0.1734	0.65331	FALSE
HAPLN1_7	HAPLN1	11.745/29.981/18.001	4.853/4.5617/47.27	18.001	4.853	-1.6988	91.331	258.49	1.3614	0.0867	0.9133	0.1734	0.65331	FALSE
ZNF232_12	ZNF232	163.53/83.282/167.05	94.634/106.06/77.124	163.53	94.634	-0.78277	3226.2	2578.8	1.3604	0.086851	0.91315	0.1737	0.65352	FALSE
ATP11A_11	ATP11A	388.5/261.5/217.45	188.46/173.34/154.25	261.5	173.34	-0.5904	9034	4207.2	1.3593	0.087019	0.91298	0.17404	0.65354	FALSE
POLR2L_3	POLR2L	113.84/201.54/162.01	100.3/93.515/29.025	162.01	93.515	-0.78636	1941.6	2553.8	1.3593	0.087029	0.91297	0.17406	0.65354	FALSE
DAZ1_13	DAZ1	77.7/121.59/72.725	33.162/84.391/32.342	77.7	33.162	-1.204	975.61	1187.1	1.3591	0.087054	0.91295	0.17411	0.65354	FALSE
TMEM221_10	TMEM221	37.043/74.953/75.605	47.721/14.825/31.513	74.953	31.513	-1.2241	718.82	1143.4	1.3576	0.087291	0.91271	0.17458	0.65435	FALSE
C1GALT1_8	C1GALT1	109.32/59.963/53.284	10.515/22.808/23.22	59.963	22.808	-1.3565	1240.5	906.09	1.357	0.087386	0.91261	0.17477	0.65435	FALSE
EWSR1_1	EWSR1	0.90349/154.9/74.885	34.78/26.23/31.513	74.885	31.513	-1.2228	5938.1	1142.3	1.3562	0.087511	0.91249	0.17502	0.65435	FALSE
NonTargeting_Human_0561	NonTargeting_Human_0561	235.81/163.23/126.01	94.634/145.97/81.271	163.23	94.634	-0.78014	3326.6	2573.9	1.3558	0.087578	0.91242	0.17516	0.65435	FALSE
UVRAG_1	UVRAG	253.88/186.55/131.05	92.207/112.9/141.81	186.55	112.9	-0.71949	3806.8	2958.4	1.3558	0.087582	0.91242	0.17516	0.65435	FALSE
TMEM30A_9	TMEM30A	27.105/96.607/119.53	26.692/87.812/45.611	96.607	45.611	-1.0663	2678	1489.7	1.3557	0.087592	0.91241	0.17518	0.65435	FALSE
LAS1L_5	LAS1L	44.271/98.272/119.53	42.868/46.757/73.807	98.272	46.757	-1.0557	1684	1516.5	1.3554	0.087641	0.91236	0.17528	0.65435	FALSE
HSD17B10_13	HSD17B10	65.954/133.25/156.25	67.133/71.847/97.856	133.25	71.847	-0.882	2528.9	2083.1	1.3554	0.087652	0.91235	0.1753	0.65435	FALSE
IREB2_15	IREB2	149.08/78.285/149.05	38.824/110.62/83.758	149.05	83.758	-0.82401	2503.9	2341.2	1.3553	0.087663	0.91234	0.17533	0.65435	FALSE
KTI12_3	KTI12	104.8/68.291/74.885	31.545/70.706/18.244	74.885	31.545	-1.2214	469.32	1142.3	1.3552	0.087677	0.91232	0.17535	0.65435	FALSE
NonTargeting_Human_0956	NonTargeting_Human_0956	113.84/108.27/110.89	4.853/59.302/55.563	110.89	55.563	-0.98413	7.7919	1720	1.3552	0.087679	0.91232	0.17536	0.65435	FALSE
COX5B_9	COX5B	109.32/184.89/301.7	111.62/156.24/88.734	184.89	111.62	-0.72296	9677.8	2930.9	1.3552	0.087684	0.91232	0.17537	0.65435	FALSE
TOMM22_1	TOMM22	104.8/86.613/151.93	167.43/51.319/37.318	104.8	51.319	-1.016	1275.9	1621.7	1.3542	0.087844	0.91216	0.17569	0.65454	FALSE
DNAL4_15	DNAL4	199.67/328.13/307.46	211.91/333/176.64	307.46	211.91	-0.53481	6023	4980.8	1.3539	0.087892	0.91211	0.17578	0.65469	FALSE
C21orf59_1	C21orf59	0/96.607/81.365	72.795/5.7021/35.66	81.365	35.66	-1.1679	3426.3	1245.6	1.3531	0.088009	0.91199	0.17602	0.65537	FALSE
PIGQ_7	PIGQ	206.9/168.23/125.29	98.678/93.515/99.515	168.23	98.678	-0.76363	1669.6	2656.1	1.3526	0.088084	0.91192	0.17617	0.65557	FALSE
EEFSEC_3	EEFSEC	252.07/266.5/272.9	201.4/177.91/161.71	266.5	177.91	-0.58035	124.56	4291	1.3526	0.088089	0.91191	0.17618	0.65557	FALSE
NonTargeting_Human_0866	NonTargeting_Human_0866	37.946/48.303/36.722	12.133/84.391/6.6343	37.946	12.133	-1.5683	54.382	562.38	1.3517	0.088231	0.91177	0.17646	0.65611	FALSE
hsa-mir-6817_4	hsa-mir-6817	390.31/173.23/50.403	97.06/102.64/170	173.23	102.64	-0.74941	31105	2738.4	1.3516	0.088259	0.91174	0.17652	0.65611	FALSE
THOC6_6	THOC6	61.437/79.95/85.686	20.221/88.953/34.83	79.95	34.83	-1.1759	187.82	1223	1.351	0.088349	0.91165	0.1767	0.65611	FALSE
SREBF1_11	SREBF1	77.7/289.82/319.7	133.46/215.54/197.37	289.82	197.37	-0.55192	22944	4683.2	1.351	0.088351	0.91165	0.1767	0.65611	FALSE
MDH1_3	MDH1	367.72/224.86/185.77	143.97/174.48/117.76	224.86	143.97	-0.63965	10968	3594.4	1.3497	0.08856	0.91144	0.17712	0.65708	FALSE
CDC73_14	CDC73	36.139/43.306/44.643	14.559/4.5617/39.806	43.306	14.559	-1.5098	26.576	645.42	1.3488	0.088693	0.91131	0.17739	0.65783	FALSE
ELP5_5	ELP5	87.638/81.616/136.09	17.794/39.915/154.25	87.638	39.915	-1.1153	1191.9	1345.8	1.3472	0.088952	0.91105	0.1779	0.65863	FALSE
CCT8_2	CCT8	0.90349/143.24/129.61	27.5/69.566/122.74	129.61	69.566	-0.88821	8375.5	2023.8	1.3458	0.089183	0.91082	0.17837	0.65931	FALSE
BRD2_10	BRD2	110.23/154.9/139.69	43.677/109.48/77.124	139.69	77.124	-0.84867	549.81	2188.1	1.3454	0.089242	0.91076	0.17848	0.65931	FALSE
INSR_15	INSR	127.39/93.275/209.53	67.942/161.94/47.27	127.39	67.942	-0.89709	3955.6	1987.7	1.3454	0.089248	0.91075	0.1785	0.65931	FALSE
RBM4B_13	RBM4B	421.02/116.59/172.81	32.353/102.64/150.1	172.81	102.64	-0.74597	32385	2731.6	1.3453	0.089261	0.91074	0.17852	0.65931	FALSE
NonTargeting_Human_0599	NonTargeting_Human_0599	280.98/224.86/180.73	143.97/222.38/144.3	224.86	144.3	-0.63643	2548.6	3594.4	1.3443	0.089431	0.91057	0.17886	0.66022	FALSE
IL17RA_10	IL17RA	121.07/78.285/46.803	23.456/101.5/34.001	78.285	34.001	-1.1797	1410.7	1196.4	1.344	0.089472	0.91053	0.17894	0.66022	FALSE
TAF10_4	TAF10	5.4209/74.953/59.044	22.647/0/39.806	59.044	22.647	-1.3443	1564.3	891.62	1.3433	0.08959	0.91041	0.17918	0.6607	FALSE
MRPL42_13	MRPL42	54.209/38.31/30.242	59.854/10.264/12.439	38.31	12.439	-1.5484	158.94	567.99	1.3425	0.089715	0.91029	0.17943	0.66141	FALSE
INTS2_4	INTS2	31.622/11.659/78.485	9.706/0/53.904	31.622	9.706	-1.6074	1297.3	465.04	1.3415	0.089879	0.91012	0.17976	0.66158	FALSE
FAM21A_9	FAM21A	51.499/163.23/164.89	110.81/50.179/95.368	163.23	95.368	-0.7691	6243.5	2573.9	1.3413	0.089918	0.91008	0.17984	0.66158	FALSE
UBE2G2_12	UBE2G2	185.21/163.23/84.966	147.21/60.442/95.368	163.23	95.368	-0.7691	3304.4	2573.9	1.3413	0.089918	0.91008	0.17984	0.66158	FALSE
NonTargeting_Human_0197	NonTargeting_Human_0197	126.49/83.282/123.13	203.02/65.004/16.586	123.13	65.004	-0.91121	799.52	1918.4	1.3408	0.089999	0.91	0.18	0.66158	FALSE
TMEM258_13	TMEM258	223.16/221.53/206.65	218.39/112.9/141.81	221.53	141.81	-0.63991	111.97	3538.9	1.3406	0.090019	0.90998	0.18004	0.66158	FALSE
FDX1L_5	FDX1L	184.31/161.57/202.33	105.15/200.71/111.95	184.31	111.95	-0.71421	421.06	2921.4	1.3405	0.090038	0.90996	0.18008	0.66158	FALSE
ACO2_11	ACO2	206.9/221.53/141.13	97.06/130.01/196.54	206.9	130.01	-0.66622	2269.8	3295.6	1.3403	0.090081	0.90992	0.18016	0.66158	FALSE
NLRP8_15	NLRP8	193.35/118.26/105.13	61.472/28.511/83.758	118.26	61.472	-0.93284	2905.2	1839.4	1.3403	0.090082	0.90992	0.18016	0.66158	FALSE
ICA1L_1	ICA1L	95.769/96.607/91.446	8.8972/78.689/45.611	95.769	45.611	-1.0539	9.6963	1476.2	1.3402	0.090098	0.9099	0.1802	0.66158	FALSE
ARGLU1_8	ARGLU1	2.7105/118.26/69.125	17.794/28.511/52.245	69.125	28.511	-1.2487	3412.6	1050.9	1.34	0.090125	0.90987	0.18025	0.66158	FALSE
METAP1D_13	METAP1D	143.65/14.991/72.725	14.559/63.864/30.684	72.725	30.684	-1.2184	4182.1	1108	1.3399	0.090144	0.90986	0.18029	0.66158	FALSE
STX4_6	STX4	111.13/84.947/153.37	84.119/53.6/56.392	111.13	56.392	-0.96624	1234.9	1723.9	1.3388	0.090312	0.90969	0.18062	0.66238	FALSE
OSTC_5	OSTC	0/3.3313/12.241	10.515/1.1404/0	3.3313	1.1404	-1.0169	45.239	44.548	1.338	0.090446	0.90955	0.18089	0.66242	FALSE
GSK3B_8	GSK3B	98.48/164.9/149.05	89.781/75.268/84.588	149.05	84.588	-0.80997	1404.2	2341.2	1.338	0.090449	0.90955	0.1809	0.66242	FALSE
NXPH2_9	NXPH2	133.72/124.92/167.05	57.427/72.987/84.588	133.72	72.987	-0.86458	594.28	2090.7	1.3377	0.090492	0.90951	0.18098	0.66242	FALSE
ZW10_15	ZW10	168.05/156.57/84.246	171.47/83.251/90.393	156.57	90.393	-0.78584	2681.3	2464.5	1.3375	0.090527	0.90947	0.18105	0.66242	FALSE
GFER_14	GFER	113.84/151.57/250.58	86.545/46.757/133.52	151.57	86.545	-0.80139	5612.8	2382.5	1.3375	0.09053	0.90947	0.18106	0.66242	FALSE
HNRNPA2B1_3	HNRNPA2B1	138.23/78.285/77.045	43.677/34.213/32.342	78.285	34.213	-1.171	1797.7	1196.4	1.3373	0.090565	0.90944	0.18113	0.66247	FALSE
ZDHHC5_9	ZDHHC5	74.086/76.619/113.77	28.309/101.5/33.172	76.619	33.172	-1.1836	693.21	1169.9	1.3371	0.090591	0.90941	0.18118	0.66247	FALSE
RPUSD4_1	RPUSD4	174.37/168.23/96.486	99.487/99.217/153.42	168.23	99.487	-0.75197	2592.4	2656.1	1.3369	0.090631	0.90937	0.18126	0.66257	FALSE
ZFR_2	ZFR	98.48/61.628/25.922	24.265/59.302/19.903	61.628	24.265	-1.3097	1316.5	932.35	1.3362	0.09074	0.90926	0.18148	0.66276	FALSE
KLHL20_5	KLHL20	198.77/158.24/280.1	123.75/118.6/145.96	198.77	123.75	-0.67926	4128.8	3160.7	1.3354	0.090865	0.90914	0.18173	0.66333	FALSE
ASH2L_13	ASH2L	30.718/111.6/61.204	53.383/4.5617/24.049	61.204	24.049	-1.3122	1734.4	925.65	1.3353	0.090888	0.90911	0.18178	0.66333	FALSE
RNF151_6	RNF151	429.16/136.58/67.684	73.604/75.268/192.4	136.58	75.268	-0.85114	45173	2137.4	1.3349	0.090958	0.90904	0.18192	0.66333	FALSE
DGKK_8	DGKK	256.59/186.55/123.13	110/114.04/131.03	186.55	114.04	-0.70512	4463.9	2958.4	1.3348	0.090975	0.90902	0.18195	0.66333	FALSE
COA4_10	COA4	184.31/228.19/305.3	157.72/115.18/147.61	228.19	147.61	-0.62499	3935.6	3650	1.3342	0.091072	0.90893	0.18214	0.6638	FALSE
GPN1_10	GPN1	13.552/46.638/36.002	9.706/22.808/11.61	36.002	11.61	-1.553	308.56	532.38	1.3328	0.091297	0.9087	0.18259	0.66475	FALSE
BST2_4	BST2	226.77/164.9/218.89	101.1/168.78/140.15	218.89	140.15	-0.63958	1488.9	3495.1	1.3326	0.091339	0.90866	0.18268	0.66475	FALSE
GPR52_9	GPR52	166.24/143.24/96.486	96.251/42.196/80.441	143.24	80.441	-0.82468	1357.6	2246.2	1.332	0.091426	0.90857	0.18285	0.66475	FALSE
LGR5_1	LGR5	197.86/173.23/133.93	35.589/220.1/103.66	173.23	103.66	-0.73523	1075.6	2738.4	1.3319	0.091444	0.90856	0.18289	0.66475	FALSE
PKD1_11	PKD1	302.67/228.19/244.1	151.25/160.8/314.3	244.1	160.8	-0.59914	1841.8	3915.6	1.3314	0.091525	0.90848	0.18305	0.66475	FALSE
CERS2_10	CERS2	214.13/89.944/146.89	142.36/83.251/20.732	146.89	83.251	-0.81176	3881.8	2305.8	1.3314	0.09153	0.90847	0.18306	0.66475	FALSE
SORT1_14	SORT1	23.491/118.26/108.73	55.001/41.055/94.539	108.73	55.001	-0.9704	3678.1	1685.1	1.3308	0.091627	0.90837	0.18325	0.66496	FALSE
TRAPPC1_5	TRAPPC1	54.209/26.65/5.7604	2.4265/7.9829/19.074	26.65	7.9829	-1.622	597.94	389.09	1.33	0.091751	0.90825	0.1835	0.6651	FALSE
MED26_3	MED26	270.14/133.25/149.77	84.119/85.532/133.52	149.77	85.532	-0.80105	7381.2	2353	1.3298	0.091787	0.90821	0.18357	0.6651	FALSE
CDC23_10	CDC23	0/56.632/60.484	12.133/21.668/35.66	56.632	21.668	-1.3462	1611	853.68	1.3295	0.09184	0.90816	0.18368	0.6651	FALSE
MRPS31_10	MRPS31	107.51/53.3/165.61	54.192/114.04/49.757	107.51	54.192	-0.97536	3157.2	1665.5	1.3295	0.091848	0.90815	0.1837	0.6651	FALSE
ZBTB8OS_11	ZBTB8OS	205.09/89.944/69.845	42.059/115.18/18.244	89.944	42.059	-1.0787	6831.4	1382.8	1.3295	0.09185	0.90815	0.1837	0.6651	FALSE
CCDC43_9	CCDC43	291.83/148.24/131.77	275.81/84.391/43.952	148.24	84.391	-0.80549	10444	2328	1.3292	0.091896	0.9081	0.18379	0.66524	FALSE
MRPL9_3	MRPL9	98.48/79.95/120.97	294.42/47.898/42.294	98.48	47.898	-1.0246	424.53	1519.8	1.3286	0.091997	0.908	0.18399	0.66538	FALSE
ZNF548_4	ZNF548	158.11/144.91/188.65	84.119/98.076/92.051	158.11	92.051	-0.77393	553.54	2489.8	1.3281	0.092075	0.90792	0.18415	0.66539	FALSE
EIF6_14	EIF6	0/69.957/38.883	12.941/6.8425/13.269	38.883	12.941	-1.5164	1238.7	576.85	1.3275	0.092179	0.90782	0.18436	0.66539	FALSE
SEC13_15	SEC13	32.525/18.322/48.963	4.853/10.264/58.05	32.525	10.264	-1.5736	235.97	478.9	1.3271	0.092238	0.90776	0.18448	0.66539	FALSE
RALGAPA2_8	RALGAPA2	74.989/44.972/59.764	23.456/0/34.83	59.764	23.456	-1.313	225.3	902.96	1.3269	0.092268	0.90773	0.18454	0.66539	FALSE
FNDC3B_7	FNDC3B	272.85/104.93/195.13	121.33/86.672/160.05	195.13	121.33	-0.68111	7088	3100.4	1.3268	0.09229	0.90771	0.18458	0.66539	FALSE
TP53TG3_9	TP53TG3	173.47/151.57/99.367	149.63/86.672/87.076	151.57	87.076	-0.79268	1602.5	2382.5	1.3266	0.092328	0.90767	0.18466	0.66539	FALSE
NonTargeting_Human_0032	NonTargeting_Human_0032	208.71/91.61/216.01	94.634/132.29/177.47	208.71	132.29	-0.65381	6882.4	3325.6	1.3259	0.092434	0.90757	0.18487	0.66539	FALSE
ARPC5L_10	ARPC5L	236.71/129.92/124.57	55.81/70.706/119.42	129.92	70.706	-0.86851	5716.8	2028.8	1.3253	0.09254	0.90746	0.18508	0.66589	FALSE
ANO8_9	ANO8	273.76/246.51/277.94	416.55/131.15/185.76	273.76	185.76	-0.55696	379.82	4412.9	1.3247	0.09263	0.90737	0.18526	0.66589	FALSE
PIGS_5	PIGS	179.79/94.941/40.323	157.72/43.336/45.611	94.941	45.611	-1.0415	5091.6	1462.9	1.3246	0.092649	0.90735	0.1853	0.66589	FALSE
ANKRD36_2	ANKRD36	187.02/114.93/102.97	31.545/76.408/59.709	114.93	59.709	-0.93326	2670.2	1785.4	1.3245	0.092668	0.90733	0.18534	0.66589	FALSE
POLR3C_1	POLR3C	0/34.978/43.203	11.324/14.825/9.1222	34.978	11.324	-1.5457	645.56	516.6	1.3235	0.092838	0.90716	0.18568	0.66626	FALSE
SNRPD1_4	SNRPD1	8.1314/74.953/60.484	42.868/23.949/14.098	60.484	23.949	-1.3012	1475.1	914.3	1.3234	0.092848	0.90715	0.1857	0.66626	FALSE
INTS12_11	INTS12	177.08/111.6/102.97	57.427/109.48/53.904	111.6	57.427	-0.94646	2181.4	1731.5	1.3215	0.093169	0.90683	0.18634	0.66805	FALSE
NonTargeting_Human_0292	NonTargeting_Human_0292	129.2/126.59/122.41	65.516/68.425/95.368	126.59	68.425	-0.87796	12.143	1974.6	1.3207	0.093295	0.90671	0.18659	0.66805	FALSE
PITPNM2_12	PITPNM2	198.77/38.31/146.89	95.443/77.549/83.758	146.89	83.758	-0.80309	7240.4	2305.8	1.3207	0.093297	0.9067	0.18659	0.66805	FALSE
GTF2H3_5	GTF2H3	50.595/96.607/115.21	46.912/25.089/77.124	96.607	46.912	-1.0266	1231.5	1489.7	1.3203	0.093373	0.90663	0.18675	0.6682	FALSE
HAPLN1_15	HAPLN1	591.78/419.74/493.23	355.89/374.06/471.04	493.23	374.06	-0.39808	7556.7	8153.2	1.3198	0.093445	0.90655	0.18689	0.66852	FALSE
MED12_12	MED12	127.39/198.21/174.25	105.15/52.459/111.13	174.25	105.15	-0.72334	1384.9	2755.3	1.3189	0.0936	0.9064	0.1872	0.66944	FALSE
INTS2_11	INTS2	105.71/39.975/51.843	15.368/19.387/53.904	51.843	19.387	-1.3741	1521.1	778.58	1.318	0.093754	0.90625	0.18751	0.67014	FALSE
KDM8_8	KDM8	93.059/138.25/104.41	152.06/52.459/9.1222	104.41	52.459	-0.97945	636.98	1615.3	1.3175	0.093838	0.90616	0.18768	0.67054	FALSE
WDR18_9	WDR18	274.66/201.54/206.65	199.78/131.15/131.03	206.65	131.15	-0.65202	2325.5	3291.5	1.3169	0.093932	0.90607	0.18786	0.67102	FALSE
ALG14_9	ALG14	89.445/128.25/114.49	47.721/60.442/59.709	114.49	59.709	-0.92776	408.32	1778.2	1.3167	0.093965	0.90603	0.18793	0.67104	FALSE
DNLZ_3	DNLZ	231.29/549.66/355.7	251.55/255.45/379.82	355.7	255.45	-0.47602	26548	5798.3	1.3165	0.093997	0.906	0.18799	0.67104	FALSE
BID_13	BID	89.445/18.322/92.886	39.633/42.196/82.1	89.445	42.196	-1.0662	2535.2	1374.8	1.316	0.094093	0.90591	0.18819	0.67104	FALSE
KIAA1432_15	KIAA1432	83.121/94.941/2.8802	38.015/13.685/52.245	83.121	38.015	-1.1084	3289.1	1273.6	1.3157	0.09414	0.90586	0.18828	0.67104	FALSE
SSX2_14	SSX2	86.735/148.24/138.97	157.72/69.566/77.953	138.97	77.953	-0.82604	1407.2	2176.4	1.3157	0.094142	0.90586	0.18828	0.67104	FALSE
TSPYL4_12	TSPYL4	106.61/101.6/48.243	46.104/93.515/50.587	101.6	50.587	-0.99201	1436.2	1570.1	1.3149	0.094276	0.90572	0.18855	0.67104	FALSE
USO1_8	USO1	46.981/49.969/34.562	16.986/22.808/0	46.981	16.986	-1.4156	81.578	702.61	1.3145	0.094335	0.90567	0.18867	0.67104	FALSE
PFDN2_15	PFDN2	131.91/116.59/74.885	0/67.285/61.368	116.59	61.368	-0.91495	987.1	1812.4	1.3137	0.094479	0.90552	0.18896	0.67104	FALSE
NonTargeting_Human_0706	NonTargeting_Human_0706	174.37/61.628/158.41	93.016/74.127/290.25	158.41	93.016	-0.76177	4810.8	2494.7	1.3133	0.094534	0.90547	0.18907	0.67104	FALSE
TRAPPC1_9	TRAPPC1	0.90349/51.635/58.324	34.78/19.387/17.415	51.635	19.387	-1.3684	1309.2	775.31	1.3131	0.094575	0.90542	0.18915	0.67104	FALSE
LAMTOR4_9	LAMTOR4	56.016/51.635/34.562	16.986/19.387/32.342	51.635	19.387	-1.3684	155.33	775.31	1.3131	0.094575	0.90542	0.18915	0.67104	FALSE
PTAR1_9	PTAR1	45.174/129.92/89.286	73.604/42.196/26.537	89.286	42.196	-1.0636	1798.5	1372.2	1.3129	0.094609	0.90539	0.18922	0.67104	FALSE
MSTO1_8	MSTO1	38.85/61.628/66.244	27.5/18.247/24.879	61.628	24.879	-1.2751	270.08	932.35	1.3126	0.094664	0.90534	0.18933	0.67104	FALSE
GTF3A_8	GTF3A	98.48/161.57/124.57	70.369/67.285/23.22	124.57	67.285	-0.87883	1024.7	1941.8	1.3125	0.09468	0.90532	0.18936	0.67104	FALSE
ZFAND1_15	ZFAND1	147.27/43.306/79.205	28.309/86.672/35.66	79.205	35.66	-1.1295	2960.6	1211.1	1.3101	0.095077	0.90492	0.19015	0.67136	FALSE
TSPAN11_4	TSPAN11	122.87/143.24/59.764	51.765/66.144/126.88	122.87	66.144	-0.88353	2198.9	1914.2	1.3098	0.095129	0.90487	0.19026	0.67136	FALSE
MTA2_11	MTA2	38.85/198.21/151.93	88.163/110.62/40.635	151.93	88.163	-0.77835	7464.5	2388.4	1.3098	0.095131	0.90487	0.19026	0.67136	FALSE
TNFRSF4_5	TNFRSF4	10.842/64.96/54.004	29.927/20.528/20.732	54.004	20.732	-1.3397	991.49	812.42	1.3091	0.095247	0.90475	0.19049	0.67136	FALSE
COPS6_11	COPS6	0.90349/39.975/64.804	13.75/28.511/9.1222	39.975	13.75	-1.474	1071.5	593.75	1.309	0.095268	0.90473	0.19054	0.67136	FALSE
AXIN1_7	AXIN1	421.93/318.14/321.86	227.28/254.31/79.612	321.86	227.28	-0.50009	5013.6	5224.3	1.3085	0.095346	0.90465	0.19069	0.67141	FALSE
ACTR6_10	ACTR6	252.98/176.56/100.81	107.58/159.66/89.563	176.56	107.58	-0.70959	5789	2793.4	1.3074	0.095536	0.90446	0.19107	0.67245	FALSE
ZNF124_11	ZNF124	84.024/19.988/25.922	4.0442/7.9829/13.269	25.922	7.9829	-1.5835	1705.6	378.01	1.3071	0.095588	0.90441	0.19118	0.67262	FALSE
URI1_3	URI1	111.13/268.17/201.61	143.16/127.73/102.83	201.61	127.73	-0.65441	6308.4	3207.9	1.3055	0.095858	0.90414	0.19172	0.67354	FALSE
CHMP1A_12	CHMP1A	357.78/263.17/200.17	143.97/250.89/178.3	263.17	178.3	-0.55911	6459.8	4235.1	1.3043	0.096064	0.90394	0.19213	0.67461	FALSE
INTS2_7	INTS2	137.33/69.957/98.647	90.59/47.898/48.928	98.647	48.928	-0.99697	1159.8	1522.5	1.304	0.096115	0.90389	0.19223	0.67476	FALSE
GATS_4	GATS	58.727/31.647/76.325	23.456/22.808/44.782	58.727	23.456	-1.2882	521.5	886.63	1.3038	0.096151	0.90385	0.1923	0.67483	FALSE
AMTN_9	AMTN	177.99/124.92/146.89	113.24/68.425/84.588	146.89	84.588	-0.78905	724.79	2305.8	1.3033	0.096236	0.90376	0.19247	0.67487	FALSE
KCNU1_8	KCNU1	279.18/169.89/187.21	88.972/116.32/157.57	187.21	116.32	-0.68188	4378.7	2969.3	1.3025	0.096375	0.90362	0.19275	0.67487	FALSE
BTF3_9	BTF3	238.52/121.59/38.163	65.516/71.847/64.685	121.59	65.516	-0.88209	10316	1893.4	1.3023	0.096402	0.9036	0.1928	0.67487	FALSE
WARS_5	WARS	263.82/169.89/209.53	190.08/118.6/134.35	209.53	134.35	-0.63741	2259	3339.4	1.3019	0.096477	0.90352	0.19295	0.67487	FALSE
PTCHD4_14	PTCHD4	129.2/93.275/59.764	45.295/86.672/31.513	93.275	45.295	-1.026	1206.7	1436.2	1.3018	0.096489	0.90351	0.19298	0.67487	FALSE
NonTargeting_Human_0291	NonTargeting_Human_0291	211.42/228.19/72.005	135.88/99.217/168.35	211.42	135.88	-0.63393	9858.4	3370.6	1.3017	0.09651	0.90349	0.19302	0.67487	FALSE
UPF1_4	UPF1	52.402/53.3/103.69	5.6618/20.528/37.318	53.3	20.528	-1.3348	1269.8	801.4	1.3017	0.096517	0.90348	0.19303	0.67487	FALSE
BRICD5_12	BRICD5	135.52/158.24/81.365	76.031/86.672/50.587	135.52	76.031	-0.82564	1724.4	2120.1	1.3006	0.096703	0.9033	0.19341	0.67522	FALSE
NonTargeting_Human_0077	NonTargeting_Human_0077	392.11/394.76/294.5	287.95/351.25/192.4	392.11	287.95	-0.44415	4767.6	6418.5	1.3002	0.096763	0.90324	0.19353	0.67522	FALSE
RAB10_4	RAB10	5.4209/24.984/19.441	14.559/2.2808/5.805	19.441	5.805	-1.5868	113.65	280.08	1.3001	0.096781	0.90322	0.19356	0.67522	FALSE
PACRGL_2	PACRGL	175.28/86.613/162.73	97.06/133.43/31.513	162.73	97.06	-0.73959	2975.7	2565.7	1.2999	0.096809	0.90319	0.19362	0.67522	FALSE
NonTargeting_Human_0635	NonTargeting_Human_0635	0.90349/56.632/61.924	61.472/13.685/22.391	56.632	22.391	-1.3009	1566.8	853.68	1.2996	0.096867	0.90313	0.19373	0.67522	FALSE
LYZ_1	LYZ	56.016/106.6/93.606	100.3/44.476/45.611	93.606	45.611	-1.0213	790.93	1441.5	1.2993	0.096914	0.90309	0.19383	0.67522	FALSE
PFDN6_11	PFDN6	18.07/106.6/120.25	59.045/54.74/18.244	106.6	54.74	-0.94889	4012	1650.7	1.299	0.096974	0.90303	0.19395	0.67522	FALSE
ANAPC16_7	ANAPC16	168.95/99.938/177.13	169.05/93.515/102	168.95	102	-0.72244	2414.9	2668	1.2989	0.096981	0.90302	0.19396	0.67522	FALSE
WDHD1_11	WDHD1	44.271/46.638/6.4804	19.412/15.966/9.1222	44.271	15.966	-1.4159	716.86	660.41	1.2988	0.097005	0.903	0.19401	0.67522	FALSE
NonTargeting_Human_0966	NonTargeting_Human_0966	146.36/94.941/100.09	50.148/42.196/64.685	100.09	50.148	-0.98285	1084.1	1545.7	1.2984	0.097081	0.90292	0.19416	0.67522	FALSE
CAPN15_11	CAPN15	204.19/179.89/287.3	130.22/197.29/112.78	204.19	130.22	-0.64493	3749	3250.6	1.2982	0.097106	0.90289	0.19421	0.67522	FALSE
ANXA13_8	ANXA13	110.23/54.966/72.725	15.368/31.932/49.757	72.725	31.932	-1.1627	860.83	1108	1.298	0.097143	0.90286	0.19429	0.67522	FALSE
PGM3_11	PGM3	0/31.647/25.922	8.0884/6.8425/34.83	25.922	8.0884	-1.5667	352.36	378.01	1.298	0.097147	0.90285	0.19429	0.67522	FALSE
PDHX_6	PDHX	84.928/61.628/84.966	125.37/18.247/39.806	84.928	39.806	-1.0743	271.43	1302.5	1.2977	0.0972	0.9028	0.1944	0.67539	FALSE
KAT8_3	KAT8	30.718/33.313/7.2005	15.368/0/9.9515	30.718	9.9515	-1.5342	279.91	451.2	1.2973	0.097257	0.90274	0.19451	0.67559	FALSE
FRG2C_13	FRG2C	177.08/158.24/133.21	150.44/46.757/93.71	158.24	93.71	-0.74957	490.78	2491.8	1.2966	0.097383	0.90262	0.19477	0.67608	FALSE
OSTC_11	OSTC	51.499/73.288/86.406	37.206/14.825/32.342	73.288	32.342	-1.1558	323.42	1116.9	1.296	0.09748	0.90252	0.19496	0.67644	FALSE
INTS8_11	INTS8	48.788/54.966/65.524	0.80884/43.336/21.562	54.966	21.562	-1.3107	74.822	827.52	1.296	0.09749	0.90251	0.19498	0.67644	FALSE
TMEM253_5	TMEM253	55.113/101.6/104.41	50.148/51.319/59.709	101.6	51.319	-0.97168	1084.6	1570.1	1.2956	0.09755	0.90245	0.1951	0.67654	FALSE
MSI2_2	MSI2	22.587/71.622/59.764	24.265/43.336/5.805	59.764	24.265	-1.2661	761.37	902.96	1.295	0.097654	0.90235	0.19531	0.67654	FALSE
SETD1A_15	SETD1A	225.87/113.26/100.81	97.869/46.757/59.709	113.26	59.709	-0.91238	6417.9	1758.4	1.295	0.097661	0.90234	0.19532	0.67654	FALSE
C12orf43_11	C12orf43	124.68/28.316/70.565	38.824/12.545/30.684	70.565	30.684	-1.1755	2356.8	1073.7	1.2949	0.097672	0.90233	0.19534	0.67654	FALSE
CDC73_9	CDC73	123.78/99.938/88.566	122.13/50.179/34.001	99.938	50.179	-0.97986	348.82	1543.3	1.2948	0.097698	0.9023	0.1954	0.67654	FALSE
MGEA5_15	MGEA5	146.36/94.941/95.766	69.56/44.476/47.27	95.766	47.27	-1.0034	1280.4	1476.2	1.2947	0.09771	0.90229	0.19542	0.67654	FALSE
MED26_7	MED26	126.49/126.59/217.45	183.61/69.566/49.757	126.59	69.566	-0.85445	4128.4	1974.6	1.2946	0.097725	0.90227	0.19545	0.67654	FALSE
COPS8_15	COPS8	112.94/86.613/101.53	33.162/51.319/112.78	101.53	51.319	-0.97059	176.29	1568.9	1.2942	0.097796	0.9022	0.19559	0.67683	FALSE
MED1_3	MED1	73.182/89.944/36.722	27.5/58.161/32.342	73.182	32.342	-1.1537	805.14	1115.3	1.2939	0.097858	0.90214	0.19572	0.67689	FALSE
NonTargeting_Human_0860	NonTargeting_Human_0860	208.71/116.59/104.41	57.427/124.31/62.197	116.59	62.197	-0.89589	4316.5	1812.4	1.2937	0.097882	0.90212	0.19576	0.67689	FALSE
EFCAB5_2	EFCAB5	30.718/123.26/140.41	67.133/101.5/62.197	123.26	67.133	-0.86689	4428.8	1920.5	1.2934	0.097936	0.90206	0.19587	0.67689	FALSE
PITPNM2_10	PITPNM2	214.13/94.941/81.365	30.736/46.757/124.39	94.941	46.757	-1.0064	7194.7	1462.9	1.2931	0.097989	0.90201	0.19598	0.67689	FALSE
PRPF38B_14	PRPF38B	126.49/51.635/69.125	26.692/131.15/29.854	69.125	29.854	-1.1844	1798.2	1050.9	1.293	0.097997	0.902	0.19599	0.67689	FALSE
UPP2_13	UPP2	148.17/199.88/189.37	100.3/118.6/182.44	189.37	118.6	-0.67056	903.92	3005.1	1.2924	0.098109	0.90189	0.19622	0.67712	FALSE
VPS51_8	VPS51	82.217/119.93/135.37	64.707/109.48/49.757	119.93	64.707	-0.88	830.21	1866.4	1.2924	0.098114	0.90189	0.19623	0.67712	FALSE
EIF3C_7	EIF3C	118.36/21.653/10.081	43.677/0/6.6343	21.653	6.6343	-1.5691	4742.7	313.37	1.291	0.098355	0.90165	0.19671	0.67778	FALSE
TMEM134_10	TMEM134	157.21/139.91/87.126	153.68/79.829/19.903	139.91	79.829	-0.80185	1542.8	2191.8	1.2906	0.098414	0.90159	0.19683	0.67778	FALSE
POLR3C_10	POLR3C	41.56/31.647/61.924	78.457/14.825/12.439	41.56	14.825	-1.4273	256.48	618.32	1.2902	0.098489	0.90151	0.19698	0.67778	FALSE
NOMO1_2	NOMO1	172.57/91.61/185.77	171.47/92.374/105.32	172.57	105.32	-0.70707	3364.1	2727.5	1.2901	0.098514	0.90149	0.19703	0.67778	FALSE
FRYL_10	FRYL	139.14/221.53/78.485	79.266/85.532/75.465	139.14	79.266	-0.80398	5233.6	2179.1	1.29	0.098527	0.90147	0.19705	0.67778	FALSE
SNAI1_3	SNAI1	170.76/123.26/105.13	36.398/67.285/259.57	123.26	67.285	-0.86369	1292.6	1920.5	1.2899	0.098546	0.90145	0.19709	0.67778	FALSE
ATP13A1_2	ATP13A1	45.174/46.638/35.282	123.75/7.9829/16.586	45.174	16.586	-1.3927	49.996	674.47	1.2899	0.098551	0.90145	0.1971	0.67778	FALSE
KIAA1432_13	KIAA1432	215.93/271.5/212.41	157.72/140.27/68.831	215.93	140.27	-0.61878	1549.9	3445.8	1.2895	0.098605	0.9014	0.19721	0.67778	FALSE
DPAGT1_2	DPAGT1	277.37/174.89/96.486	77.648/107.2/124.39	174.89	107.2	-0.70099	8324.6	2765.9	1.2894	0.098628	0.90137	0.19726	0.67778	FALSE
GNB2L1_9	GNB2L1	74.086/41.641/46.803	15.368/35.353/17.415	46.803	17.415	-1.3762	385.5	699.84	1.2892	0.098669	0.90133	0.19734	0.67778	FALSE
PFDN6_6	PFDN6	92.155/71.622/33.122	18.603/31.932/31.513	71.622	31.513	-1.1594	951.93	1090.5	1.289	0.098698	0.9013	0.1974	0.67778	FALSE
PES1_4	PES1	142.75/154.9/114.49	157.72/82.11/38.147	142.75	82.11	-0.79047	473.25	2238.1	1.2884	0.098809	0.90119	0.19762	0.67778	FALSE
NonTargeting_Human_0887	NonTargeting_Human_0887	223.16/203.21/198.01	97.06/130.01/200.69	203.21	130.01	-0.64038	212.56	3234.3	1.288	0.098869	0.90113	0.19774	0.67778	FALSE
ZBTB37_9	ZBTB37	9.9383/71.622/110.89	31.545/27.37/33.172	71.622	31.545	-1.158	2673.3	1090.5	1.2879	0.098883	0.90112	0.19777	0.67778	FALSE
SPRN_4	SPRN	317.12/173.23/142.57	105.96/140.27/85.417	173.23	105.96	-0.70392	10823	2738.4	1.2879	0.098895	0.90111	0.19779	0.67778	FALSE
CBWD1_4	CBWD1	146.36/121.59/49.683	37.206/66.144/92.881	121.59	66.144	-0.86852	2892.2	1893.4	1.2876	0.098945	0.90106	0.19789	0.67778	FALSE
EWSR1_15	EWSR1	168.05/121.59/101.53	85.737/66.144/46.44	121.59	66.144	-0.86852	1280.4	1893.4	1.2876	0.098945	0.90106	0.19789	0.67778	FALSE
PDHX_12	PDHX	133.72/44.972/80.645	140.74/29.651/37.318	80.645	37.318	-1.0913	2044.5	1234.1	1.2876	0.098946	0.90105	0.19789	0.67778	FALSE
INTS12_4	INTS12	94.866/66.625/100.81	46.912/60.442/14.927	94.866	46.912	-1.0006	416.41	1461.7	1.2874	0.098977	0.90102	0.19795	0.67778	FALSE
RAB10_7	RAB10	196.96/314.8/241.94	161.77/92.374/173.32	241.94	161.77	-0.57777	3666.3	3879.5	1.2874	0.09898	0.90102	0.19796	0.67778	FALSE
NonTargeting_Human_0115	NonTargeting_Human_0115	105.71/226.53/167.05	101.1/160.8/97.856	167.05	101.1	-0.71885	3650.1	2636.7	1.2872	0.099008	0.90099	0.19802	0.67778	FALSE
CEBPZ_3	CEBPZ	44.271/8.3282/33.842	1.6177/11.404/16.586	33.842	11.404	-1.49	379.86	499.12	1.2865	0.099131	0.90087	0.19826	0.67794	FALSE
SCYL1_8	SCYL1	109.32/33.313/33.842	8.8972/11.404/14.927	33.842	11.404	-1.49	2848.7	499.12	1.2865	0.099131	0.90087	0.19826	0.67794	FALSE
STXBP5L_3	STXBP5L	109.32/81.616/60.484	38.015/47.898/0	81.616	38.015	-1.0824	607.08	1249.6	1.2857	0.099271	0.90073	0.19854	0.67794	FALSE
STT3A_14	STT3A	99.383/99.938/79.925	50.148/15.966/73.807	99.383	50.148	-0.97278	189.46	1534.4	1.2852	0.099355	0.90064	0.19871	0.67794	FALSE
BRICD5_4	BRICD5	38.85/153.24/178.57	144.78/41.055/90.393	153.24	90.393	-0.75501	6863.2	2409.8	1.2848	0.099426	0.90057	0.19885	0.67794	FALSE
SPINT1_13	SPINT1	81.314/141.58/126.01	69.56/68.425/199.86	126.01	69.56	-0.848	1120	1965.2	1.2848	0.099429	0.90057	0.19886	0.67794	FALSE
ELP3_8	ELP3	149.98/83.282/144.01	120.52/83.251/63.026	144.01	83.251	-0.78339	1861.8	2258.7	1.2847	0.099448	0.90055	0.1989	0.67794	FALSE
PAM16_2	PAM16	215.93/161.57/146.17	109.19/96.936/34.001	161.57	96.936	-0.73112	1596.4	2546.5	1.2843	0.099526	0.90047	0.19905	0.67794	FALSE
FZD6_6	FZD6	167.14/198.21/241.94	126.18/123.17/210.64	198.21	126.18	-0.64744	1438.5	3151.4	1.2842	0.099536	0.90046	0.19907	0.67794	FALSE
PHKG2_10	PHKG2	58.727/29.981/98.647	36.398/23.949/22.391	58.727	23.949	-1.2594	1209.9	886.63	1.2842	0.099538	0.90046	0.19908	0.67794	FALSE
NELFA_6	NELFA	146.36/131.59/58.324	55.001/123.17/73.807	131.59	73.807	-0.82567	2792.8	2055.9	1.2837	0.099616	0.90038	0.19923	0.67828	FALSE
SYS1_13	SYS1	201.48/206.54/161.29	242.65/128.87/89.563	201.48	128.87	-0.64072	820.29	3205.6	1.2834	0.099675	0.90032	0.19935	0.67849	FALSE
SPSB3_7	SPSB3	379.46/326.46/295.94	149.63/303.35/233.03	326.46	233.03	-0.48464	1870.4	5302.2	1.2832	0.099719	0.90028	0.19944	0.67857	FALSE
VPS51_4	VPS51	243.94/124.92/148.33	194.12/86.672/54.733	148.33	86.672	-0.76831	4844.7	2329.4	1.2829	0.099758	0.90024	0.19952	0.67857	FALSE
PTAR1_10	PTAR1	115.65/124.92/204.49	137.5/35.353/68.831	124.92	68.831	-0.85059	3208.8	1947.5	1.2829	0.09977	0.90023	0.19954	0.67857	FALSE
IREB2_11	IREB2	116.55/114.93/34.562	61.472/101.5/47.27	114.93	61.472	-0.89197	3230.7	1785.4	1.2817	0.099971	0.90003	0.19994	0.67937	FALSE
ST6GAL1_15	ST6GAL1	375.85/218.2/121.69	220/115.18/142.64	218.2	142.64	-0.6098	17084	3483.5	1.2808	0.10013	0.89987	0.20027	0.67943	FALSE
VOPP1_5	VOPP1	52.402/48.303/55.444	6.4707/20.528/25.708	52.402	20.528	-1.3107	13.026	787.33	1.2806	0.10017	0.89983	0.20034	0.67943	FALSE
ANO8_2	ANO8	104.8/119.93/85.686	54.192/69.566/46.44	104.8	54.192	-0.93887	297.09	1621.7	1.2801	0.10025	0.89975	0.2005	0.67943	FALSE
ROR1_5	ROR1	140.94/53.3/35.282	21.03/23.949/8.2929	53.3	21.03	-1.3015	4003	801.4	1.2799	0.10029	0.89971	0.20057	0.67943	FALSE
TAF8_10	TAF8	74.989/244.85/175.69	122.94/108.34/1.6586	175.69	108.34	-0.69241	7461.8	2779.1	1.2798	0.10031	0.89969	0.20061	0.67943	FALSE
FAM57B_14	FAM57B	150.88/84.947/131.77	83.31/74.127/51.416	131.77	74.127	-0.8215	1278.8	2058.9	1.2797	0.10033	0.89967	0.20066	0.67943	FALSE
NonTargeting_Human_0485	NonTargeting_Human_0485	148.17/71.622/97.927	49.339/37.634/75.465	97.927	49.339	-0.97468	1608.2	1510.9	1.2795	0.10036	0.89964	0.20073	0.67943	FALSE
G6PC_8	G6PC	136.43/133.25/102.25	75.222/75.268/142.64	133.25	75.268	-0.81578	485.66	2083.1	1.2793	0.10039	0.89961	0.20078	0.67943	FALSE
ASB16_14	ASB16	251.17/143.24/92.166	143.97/75.268/82.929	143.24	82.929	-0.78127	7128.3	2246.2	1.279	0.10045	0.89955	0.20089	0.67943	FALSE
KIF3C_7	KIF3C	206.9/169.89/118.09	135.88/103.78/63.026	169.89	103.78	-0.70577	2026.6	2683.5	1.279	0.10046	0.89954	0.20091	0.67943	FALSE
CLEC3B_7	CLEC3B	174.37/103.27/126.73	70.369/143.69/54.733	126.73	70.369	-0.83972	1410.2	1976.9	1.2787	0.10051	0.89949	0.20102	0.67943	FALSE
FER_9	FER	174.37/46.638/133.21	63.089/75.268/103.66	133.21	75.268	-0.81533	4594.5	2082.4	1.2786	0.10052	0.89948	0.20103	0.67943	FALSE
ZBTB10_9	ZBTB10	225.87/183.22/118.09	189.27/85.532/114.44	183.22	114.44	-0.67426	3030.7	2903.3	1.2781	0.1006	0.8994	0.2012	0.67943	FALSE
ATXN7L3_13	ATXN7L3	87.638/99.938/57.604	25.883/85.532/42.294	87.638	42.294	-1.0338	526.67	1345.8	1.278	0.10062	0.89938	0.20125	0.67943	FALSE
PPIL2_4	PPIL2	107.51/113.26/142.57	0.80884/60.442/62.197	113.26	60.442	-0.89505	445.95	1758.4	1.277	0.10079	0.89921	0.20159	0.67943	FALSE
CCT6A_10	CCT6A	0/33.313/50.403	11.324/57.021/6.6343	33.313	11.324	-1.4773	700.91	490.99	1.2768	0.10083	0.89917	0.20167	0.67943	FALSE
MRPS16_11	MRPS16	110.23/118.26/102.97	58.236/47.898/83.758	110.23	58.236	-0.90893	58.62	1709.3	1.2768	0.10084	0.89916	0.20167	0.67943	FALSE
CCT6A_2	CCT6A	3.6139/24.984/41.763	155.3/7.9829/4.9757	24.984	7.9829	-1.5324	369.11	363.78	1.2768	0.10084	0.89916	0.20168	0.67943	FALSE
BOLA2_15	BOLA2	117.45/109.93/63.364	33.162/71.847/58.05	109.93	58.05	-0.90965	1112.6	1704.5	1.2761	0.10096	0.89904	0.20192	0.67943	FALSE
TBX6_1	TBX6	96.673/204.87/152.65	58.236/131.15/90.393	152.65	90.393	-0.7495	2930.3	2400.2	1.2754	0.10108	0.89892	0.20216	0.67943	FALSE
ORMDL1_6	ORMDL1	159.92/68.291/61.924	16.986/34.213/29.854	68.291	29.854	-1.1672	4217.9	1037.7	1.2753	0.10111	0.89889	0.20222	0.67943	FALSE
AKAP9_14	AKAP9	146.36/146.58/85.686	45.295/85.532/113.61	146.36	85.532	-0.76809	1841	2297.2	1.2749	0.10117	0.89883	0.20233	0.67943	FALSE
RAB10_1	RAB10	19.877/71.622/113.77	70.369/31.932/29.854	71.622	31.932	-1.1409	2226.9	1090.5	1.2749	0.10117	0.89883	0.20235	0.67943	FALSE
NonTargeting_Human_0396	NonTargeting_Human_0396	429.16/228.19/286.58	196.55/234.93/199.86	286.58	199.86	-0.51777	11869	4628.6	1.2747	0.1012	0.8988	0.20241	0.67943	FALSE
AHSP_15	AHSP	82.217/58.297/94.326	39.633/38.774/29.025	82.217	38.774	-1.065	359.4	1259.1	1.2747	0.10121	0.89879	0.20242	0.67943	FALSE
STAG2_4	STAG2	60.534/189.88/131.05	67.133/147.11/73.807	131.05	73.807	-0.81983	4216.9	2047.2	1.2746	0.10122	0.89878	0.20243	0.67943	FALSE
FAM156A_12	FAM156A	407.47/291.49/208.09	149.63/258.88/204.01	291.49	204.01	-0.5127	10203	4711.3	1.2746	0.10123	0.89877	0.20247	0.67943	FALSE
WDR61_2	WDR61	42.464/43.306/54.724	70.369/15.966/15.757	43.306	15.966	-1.3849	65.531	645.42	1.2744	0.10126	0.89874	0.20252	0.67943	FALSE
CDC14A_10	CDC14A	121.07/121.59/110.17	121.33/58.161/66.343	121.07	66.343	-0.85807	59.539	1884.9	1.2738	0.10137	0.89863	0.20274	0.6798	FALSE
ZNF213_5	ZNF213	66.858/231.52/173.53	198.16/61.583/106.98	173.53	106.98	-0.69274	7371.1	2743.5	1.273	0.10152	0.89848	0.20303	0.68056	FALSE
CHRNA3_13	CHRNA3	391.21/223.19/182.17	147.21/139.13/246.3	223.19	147.21	-0.59713	14956	3566.7	1.2728	0.10154	0.89846	0.20308	0.68056	FALSE
PTCHD4_10	PTCHD4	137.33/158.24/46.083	61.472/78.689/117.76	137.33	78.689	-0.79566	4381.5	2149.6	1.2725	0.1016	0.8984	0.2032	0.68056	FALSE
DEXI_15	DEXI	137.33/161.57/120.25	56.618/78.689/112.78	137.33	78.689	-0.79566	439.6	2149.6	1.2725	0.1016	0.8984	0.2032	0.68056	FALSE
SREBF1_8	SREBF1	247.55/151.57/224.65	203.02/144.83/148.44	224.65	148.44	-0.59452	2932.7	3591	1.2722	0.10164	0.89836	0.20329	0.68056	FALSE
PROX1_11	PROX1	74.086/71.622/73.445	49.339/19.387/33.172	73.445	33.172	-1.1234	1.8664	1119.4	1.2719	0.10171	0.89829	0.20341	0.68056	FALSE
HDAC6_11	HDAC6	32.525/73.288/98.647	3.2353/33.072/145.96	73.288	33.072	-1.1245	1152.3	1116.9	1.2719	0.10171	0.89829	0.20342	0.68056	FALSE
CHD7_1	CHD7	52.402/73.288/102.97	15.368/33.072/74.636	73.288	33.072	-1.1245	658.53	1116.9	1.2719	0.10171	0.89829	0.20342	0.68056	FALSE
AMTN_11	AMTN	160.82/111.6/193.69	36.398/169.92/97.027	160.82	97.027	-0.72314	1751.8	2534.3	1.2707	0.10191	0.89809	0.20382	0.68138	FALSE
GFER_1	GFER	25.298/94.941/78.485	17.794/36.493/99.515	78.485	36.493	-1.084	1549.9	1199.6	1.2694	0.10216	0.89784	0.20431	0.68264	FALSE
PDGFA_7	PDGFA	109.32/73.288/66.964	26.692/41.055/33.172	73.288	33.172	-1.1203	669.21	1116.9	1.2686	0.10229	0.89771	0.20459	0.68264	FALSE
EXOC8_5	EXOC8	202.38/126.59/45.363	41.251/70.706/129.37	126.59	70.706	-0.83133	6171	1974.6	1.2685	0.1023	0.8977	0.20461	0.68264	FALSE
WNT3A_2	WNT3A	155.4/159.9/99.367	87.354/147.11/92.881	155.4	92.881	-0.73634	1580	2445.3	1.2685	0.10231	0.89769	0.20462	0.68264	FALSE
DCAF4_2	DCAF4	155.4/183.22/92.886	165/53.6/92.881	155.4	92.881	-0.73634	2340.9	2445.3	1.2685	0.10231	0.89769	0.20462	0.68264	FALSE
WDR7_1	WDR7	143.65/96.607/164.17	107.58/34.213/83.758	143.65	83.758	-0.77118	1317.2	2252.9	1.2681	0.10238	0.89762	0.20477	0.68264	FALSE
MED12_6	MED12	2.7105/138.25/174.97	131.03/20.528/79.612	138.25	79.612	-0.78859	9859.5	2164.6	1.2677	0.10245	0.89755	0.2049	0.68277	FALSE
SAFB_7	SAFB	441.8/121.59/243.38	127.8/209.84/164.2	243.38	164.2	-0.56489	27103	3903.6	1.2675	0.10249	0.89751	0.20497	0.68277	FALSE
RDH14_9	RDH14	281.89/388.09/337.7	360.74/233.79/243.81	337.7	243.81	-0.46835	2827.2	5492.7	1.2669	0.1026	0.8974	0.2052	0.68277	FALSE
PQBP1_7	PQBP1	243.04/286.49/255.62	382.58/174.48/146.78	255.62	174.48	-0.54827	555.66	4108.5	1.2659	0.10277	0.89723	0.20554	0.68319	FALSE
MTA2_8	MTA2	41.56/83.282/82.085	6.4707/41.055/38.977	82.085	38.977	-1.0554	821.86	1257	1.2659	0.10277	0.89723	0.20555	0.68319	FALSE
MOCS3_2	MOCS3	84.024/131.59/135.37	71.986/94.655/74.636	131.59	74.636	-0.80977	1138.2	2055.9	1.2652	0.1029	0.8971	0.2058	0.68329	FALSE
CAPN15_7	CAPN15	236.71/136.58/66.244	78.457/179.05/27.367	136.58	78.457	-0.79204	7486.8	2137.4	1.265	0.10293	0.89707	0.20585	0.68329	FALSE
SHC1_5	SHC1	29.815/51.635/38.163	17.794/13.685/4.9757	38.163	13.685	-1.4151	125.59	565.72	1.2646	0.103	0.897	0.206	0.6836	FALSE
KMT2D_1	KMT2D	67.761/98.272/127.45	29.118/50.179/92.051	98.272	50.179	-0.95585	891.08	1516.5	1.2635	0.1032	0.8968	0.20641	0.68407	FALSE
ARL8A_5	ARL8A	218.64/59.963/138.25	118.9/79.829/78.783	138.25	79.829	-0.78472	6296	2164.6	1.263	0.10329	0.89671	0.20658	0.68407	FALSE
ORMDL3_4	ORMDL3	106.61/101.6/48.963	52.574/90.093/34.83	101.6	52.574	-0.93747	1398	1570.1	1.2627	0.10334	0.89666	0.20669	0.68407	FALSE
MRPS16_7	MRPS16	81.314/96.607/119.53	126.18/49.038/33.172	96.607	49.038	-0.96395	379.63	1489.7	1.2626	0.10337	0.89663	0.20674	0.68407	FALSE
EEFSEC_10	EEFSEC	76.796/181.55/141.13	30.736/137.99/82.1	141.13	82.1	-0.77429	2886.5	2211.6	1.2619	0.1035	0.8965	0.20699	0.68407	FALSE
HYOU1_10	HYOU1	65.954/46.638/54.004	21.839/9.1234/29.854	54.004	21.839	-1.2681	98.539	812.42	1.2619	0.1035	0.8965	0.207	0.68407	FALSE
ABCB4_12	ABCB4	196.96/313.14/327.62	223.24/213.26/296.89	313.14	223.24	-0.48637	6853.7	5076.8	1.2618	0.10352	0.89648	0.20704	0.68407	FALSE
NonTargeting_Human_0620	NonTargeting_Human_0620	23.491/59.963/55.444	22.647/70.706/14.098	55.444	22.647	-1.2551	520.71	835.02	1.2617	0.10353	0.89647	0.20707	0.68407	FALSE
UBE2Q1_3	UBE2Q1	22.587/84.947/55.444	22.647/46.757/0	55.444	22.647	-1.2551	975.01	835.02	1.2617	0.10353	0.89647	0.20707	0.68407	FALSE
TAF2_12	TAF2	65.954/71.622/106.57	32.353/22.808/53.904	71.622	32.353	-1.1226	626.63	1090.5	1.2607	0.1037	0.8963	0.20741	0.68417	FALSE
ELOF1_11	ELOF1	52.402/163.23/74.165	29.927/92.374/34.001	74.165	34.001	-1.1027	4203.3	1130.9	1.2597	0.10388	0.89612	0.20777	0.68441	FALSE
DNLZ_11	DNLZ	69.568/231.52/146.89	95.443/86.672/65.514	146.89	86.672	-0.75433	6570.7	2305.8	1.2595	0.10392	0.89608	0.20784	0.68441	FALSE
RPL41_6	RPL41	297.25/276.5/247.7	232.94/167.64/192.4	276.5	192.4	-0.52091	629.99	4458.9	1.2595	0.10392	0.89608	0.20784	0.68441	FALSE
TMEM221_8	TMEM221	104.8/208.2/261.38	150.44/135.71/129.37	208.2	135.71	-0.61379	6759.5	3317.3	1.2594	0.10394	0.89606	0.20788	0.68441	FALSE
SMC1A_12	SMC1A	18.07/11.659/23.042	0/5.7021/29.025	18.07	5.7021	-1.5086	32.905	259.51	1.2594	0.10394	0.89606	0.20789	0.68441	FALSE
SUMO2_11	SUMO2	51.499/59.963/42.483	29.927/20.528/16.586	51.499	20.528	-1.2861	76.463	773.18	1.2591	0.104	0.896	0.208	0.68441	FALSE
ZNF213_11	ZNF213	428.25/231.52/326.18	234.56/436.78/156.74	326.18	234.56	-0.47398	9689.3	5297.5	1.2588	0.10405	0.89595	0.2081	0.68441	FALSE
DHDDS_4	DHDDS	0/44.972/15.841	0/18.247/4.9757	15.841	4.9757	-1.4948	549.78	226.24	1.2584	0.10412	0.89588	0.20824	0.68452	FALSE
GNB1L_11	GNB1L	387.6/398.09/298.82	198.16/287.39/307.67	387.6	287.39	-0.43027	3995.6	6341.4	1.2584	0.10413	0.89587	0.20825	0.68452	FALSE
STAG2_1	STAG2	45.174/199.88/113.77	38.015/61.583/90.393	113.77	61.583	-0.87488	6059.8	1766.6	1.2582	0.10415	0.89585	0.2083	0.68452	FALSE
GATS_3	GATS	39.753/56.632/34.562	14.559/27.37/9.9515	39.753	14.559	-1.3892	155.91	590.32	1.2575	0.10429	0.89571	0.20857	0.68515	FALSE
WBSCR16_13	WBSCR16	296.34/161.57/167.05	95.443/102.64/111.95	167.05	102.64	-0.69735	8373.3	2636.7	1.2572	0.10433	0.89567	0.20867	0.68515	FALSE
LAS1L_11	LAS1L	0/1.6656/33.842	242.65/0/0	1.6656	0	-1.4145	519.05	21.635	1.257	0.10438	0.89562	0.20877	0.68515	FALSE
CEBPZ_2	CEBPZ	0/1.6656/4.3203	0/0/38.147	1.6656	0	-1.4145	4.9108	21.635	1.257	0.10438	0.89562	0.20877	0.68515	FALSE
MSTO1_3	MSTO1	46.981/211.54/131.05	28.309/92.374/74.636	131.05	74.636	-0.80392	6772.7	2047.2	1.2561	0.10455	0.89545	0.20909	0.68576	FALSE
GSK3B_3	GSK3B	77.7/243.18/192.25	122.94/260.02/80.441	192.25	122.94	-0.64081	7858.1	3052.7	1.2557	0.10462	0.89538	0.20923	0.68576	FALSE
TMEM18_8	TMEM18	36.139/108.27/94.326	47.721/116.32/44.782	94.326	47.721	-0.96832	1790	1453.1	1.2549	0.10477	0.89523	0.20953	0.68576	FALSE
BMI1_1	BMI1	74.086/46.638/59.044	97.06/1.1404/24.879	59.044	24.879	-1.2143	190.09	891.62	1.2547	0.10479	0.89521	0.20958	0.68576	FALSE
[truncated: 10,624 more rows]

## Sheet: tLDLR_gene
id	num	neg|score	neg|p-value	neg|fdr	neg|rank	neg|goodsgrna	neg|lfc	pos|score	pos|p-value	pos|fdr	pos|rank	pos|goodsgrna	pos|lfc
[truncated: 1,751 more rows]

[truncated: 1 more sheets: tLDLR_gRNA]
