# Supplementary material for: Genome-scale CRISPR screening for modifiers of cellular LDL uptake
Source: bioRxiv preprint, doi:10.1101/2020.07.01.182246, version 1 (2020-07-01)
Supplement: Supplemental Table 9 [file 182246_file22.xlsx]

## Sheet: annotation
Orthogonal screen of LDL uptake in HepG2 cells cultured under lipoprotein-rich or lipoprotein-depleted conditions
Output files from MAGeCK analysis
control = LDLlow sorted cells
treatment = LDLhigh sorted cells
Gene-level analysis
id	gene ID
num	number of individual gRNAs detected for a given gene
neg|score	MAGeCK significance score for depletion in LDLhigh cells (low score indicates gene disruption reduces LDL uptake)
neg|p-value	p-value for depletion in LDLhigh cells (gene disruption reduces LDL uptake)
neg|fdr	FDR for depletion in LDLhigh cells (gene disruption reduces LDL uptake)
neg|rank	gene rank for depletion in LDLhigh cells (gene disruption reduces LDL uptake)
neg|goodsgrna	number of gene-targeting gRNA with significant depletion in LDLhigh cells (gene disruption reduces LDL uptake)
neg|lfc	composite log2 fold change of gene-targeting gRNA (negative value indicates gene disruption reduces LDL uptake)
pos|score	MAGeCK significance score for enrichment in LDLhigh cells (low score indicates gene disruption increases LDL uptake)
pos|p-value	p-value for enrichment in LDLhigh cells (gene disruption increases LDL uptake)
pos|fdr	FDR for enrichment in LDLhigh cells (gene disruption increases LDL uptake)
pos|rank	gene rank for enrichment in LDLhigh cells (gene disruption increases LDL uptake)
pos|goodsgrna	number of gene-targeting gRNA with significant enrichment in LDLhigh cells (gene disruption increases LDL uptake)
pos|lfc	composite log2 fold change of gene-targeting gRNA (positive value indicates gene disruption increases LDL uptake)
gRNA-level analysis
sgrna	GeCKO library gRNA identifier
gene	targeted gene
control_count	individual replicate normalized read counts in LDLlow cells
treatment_count	individual replicate normalized read counts in LDLhigh cells
control_mean	mean normalized read counts in LDLlow cells
treat_mean	mean normalized read counts in LDLhigh cells
LFC	log2 fold change of normalized read counts in LDLhigh relative to LDLlow cells
control_var	raw variance in LDLlow cells
adj_var	adjusted variance in LDLlow cells
score	MAGeCK significance score for individual gRNA
p.low	p-value for depletion in LDLhigh cells (gene disruption reduces LDL uptake)
p.high	p-value for enrichment in LDLhigh cells (gene disruption increases LDL uptake)
p.twosided	minimum p-value for either enrichment or depletion
FDR	FDR for p.twosided
high_in_treatment	whether normalized read counts for gRNA are higher in LDLhigh than LDLlow cells (gene disruption increases LDL uptake)

## Sheet: HepG2_LP-rich_gene
id	num	neg|score	neg|p-value	neg|fdr	neg|rank	neg|goodsgrna	neg|lfc	pos|score	pos|p-value	pos|fdr	pos|rank	pos|goodsgrna	pos|lfc
SCAP	15	3.0517e-21	2.8321e-06	0.000825	1	14	-2.4256	0.99865	0.9986	0.999997	1736	0	-2.4256
LDLR	15	6.7247e-14	2.8321e-06	0.000825	2	15	-2.213	1	1	0.999997	1748	0	-2.213
MBTPS2	15	2.287e-12	2.8321e-06	0.000825	3	14	-2.1322	1	1	0.999997	1746	0	-2.1322
MBTPS1	15	4.4802e-12	2.8321e-06	0.000825	4	15	-1.845	1	1	0.999997	1747	0	-1.845
DYRK1A	15	8.0687e-08	2.8321e-06	0.000825	5	14	-1.3394	1	1	0.999997	1744	0	-1.3394
ATXN7L3	15	2.6732e-07	2.8321e-06	0.000825	6	13	-1.3681	1	1	0.999997	1745	0	-1.3681
DPAGT1	15	3.4893e-06	4.8146e-05	0.012023	7	9	-1.4631	0.32194	0.56528	0.965334	721	1	-1.4631
SLC35B2	15	8.3688e-06	0.00012744	0.025248	8	12	-1.0907	0.67727	0.81817	0.989644	1308	1	-1.0907
DHDDS	15	9.3244e-06	0.00013311	0.025248	9	6	-0.3859	0.9781	0.97822	0.999997	1705	0	-0.3859
hsa-mir-6886	13	1.4905e-05	0.00014444	0.025248	10	10	-0.98927	0.94954	0.94924	0.999997	1654	0	-0.98927
CTNNBIP1	15	4.0013e-05	0.00034268	0.054043	11	10	-0.98679	0.99983	0.9998	0.999997	1743	0	-0.98679
ELP3	15	4.5465e-05	0.000371	0.054043	12	9	-1.3044	0.8836	0.91983	0.999997	1573	1	-1.3044
CHD7	15	8.5484e-05	0.00072218	0.095827	13	9	-1.0551	0.4012	0.63305	0.965334	867	2	-1.0551
CCT8	15	9.3697e-05	0.0007675	0.095827	14	6	0.11316	0.10519	0.27654	0.965334	293	2	0.11316
MSTO1	15	0.00011665	0.00089777	0.10462	15	11	-0.87523	0.38333	0.61961	0.965334	834	2	-0.87523
ALG2	15	0.00020342	0.0014868	0.152883	16	9	-1.005	0.0070286	0.034175	0.902682	52	3	-1.005
ARPC3	15	0.00022364	0.0016426	0.159516	17	9	-1.2056	0.64952	0.80541	0.989313	1270	1	-1.2056
HYPK	15	0.00031442	0.0024101	0.22173	18	5	0.028891	0.032289	0.11615	0.948682	138	4	0.028891
UBE2Q1	14	0.00036492	0.0026707	0.233416	19	8	-0.59823	0.97657	0.97658	0.999997	1704	0	-0.59823
YME1L1	15	0.0004177	0.0031634	0.263319	20	8	-0.90247	0.42228	0.64876	0.965932	900	2	-0.90247
OTC	15	0.00071664	0.0050043	0.397615	21	10	-0.73315	0.77862	0.87218	0.999997	1441	1	-0.73315
HYOU1	14	0.00079518	0.0054291	0.404554	22	8	-0.94272	0.063334	0.18882	0.963532	212	2	-0.94272
TMEM199	15	0.00082804	0.0057123	0.404554	23	10	-0.73641	0.99882	0.99876	0.999997	1739	0	-0.73641
ATP6AP2	14	0.00086182	0.005786	0.404554	24	9	-0.80301	0.99696	0.99685	0.999997	1733	0	-0.80301
WDR7	15	0.00094335	0.0064827	0.420969	25	10	-0.83372	0.99641	0.9963	0.999997	1732	0	-0.83372
MORC2	15	0.00097285	0.0067092	0.420969	26	9	-0.73981	0.047771	0.15854	0.963532	171	3	-0.73981
WWP1	15	0.0010468	0.0072926	0.436469	27	6	-0.29315	0.32923	0.57326	0.965334	740	1	-0.29315
MOCS3	15	0.001073	0.0074909	0.436469	28	8	-0.60826	0.15567	0.36583	0.965334	406	2	-0.60826
POLR3H	15	0.0011502	0.0079837	0.450176	29	10	-0.68127	0.98819	0.98811	0.999997	1719	0	-0.68127
NonTargeting_Human_0836	1	0.001196	0.001232	0.134592	30	1	-7.3566	0.9988	0.99882	0.999997	1738	0	-7.3566
ACO2	15	0.0013359	0.0091505	0.4967	31	8	-0.88265	0.98098	0.98113	0.999997	1707	0	-0.88265
SRP19	15	0.0013703	0.0093771	0.4967	32	9	-0.6238	0.82193	0.89953	0.999997	1499	1	-0.6238
MESDC2	15	0.0015215	0.010068	0.514993	33	7	-0.55417	0.16842	0.38321	0.965334	433	2	-0.55417
ZBTB8OS	14	0.0016465	0.010312	0.514993	34	8	-0.61061	0.29255	0.53076	0.965334	663	2	-0.61061
VHL	15	0.0019542	0.012651	0.553127	35	7	-0.40123	0.98211	0.98216	0.999997	1708	0	-0.40123
SETD1A	15	0.0020028	0.012934	0.553127	36	6	-0.15584	0.24306	0.47345	0.965334	573	2	-0.15584
HNRNPU	14	0.0020658	0.012662	0.553127	37	8	-0.67201	0.8164	0.88801	0.999997	1492	1	-0.67201
UVRAG	14	0.0023037	0.013874	0.57744	38	5	-0.066117	0.1187	0.29976	0.965334	330	3	-0.066117
MRPL28	15	0.0025447	0.015868	0.645061	39	6	-0.16433	0.063021	0.19556	0.963532	211	3	-0.16433
LSM2	15	0.0034064	0.020569	0.780219	40	6	0.090088	0.020021	0.081261	0.948682	91	5	0.090088
SREBF2	15	0.0034126	0.020603	0.780219	41	8	-0.59069	0.056011	0.18018	0.963532	198	2	-0.59069
EXOC3	15	0.0035603	0.021408	0.780219	42	4	-0.26862	0.93623	0.94246	0.999997	1628	1	-0.26862
CSNK1A1	15	0.0035652	0.021425	0.780219	43	4	-0.20203	0.79013	0.87881	0.999997	1458	2	-0.20203
B4GALT2	15	0.004675	0.026964	0.867961	44	8	-0.67845	0.034686	0.12241	0.948682	147	2	-0.67845
MKL1	15	0.0049944	0.028681	0.867961	45	6	-0.34657	0.90551	0.9277	0.999997	1594	1	-0.34657
ANO8	15	0.0051495	0.02944	0.867961	46	8	-0.74786	0.62702	0.79586	0.988967	1235	2	-0.74786
C19orf57	15	0.0054286	0.030844	0.867961	47	6	-0.29753	0.75545	0.85887	0.996322	1413	1	-0.29753
hsa-mir-7973-1	4	0.0054631	0.018258	0.72536	48	2	-1.4044	0.69896	0.69842	0.979035	1335	0	-1.4044
ITGA1	15	0.005553	0.031501	0.867961	49	5	-0.36561	0.15003	0.35639	0.965334	393	2	-0.36561
AP2M1	15	0.0056061	0.031779	0.867961	50	8	-0.62213	0.1024	0.27128	0.965334	290	1	-0.62213
PIAS1	15	0.0058373	0.0329	0.871362	51	8	-0.69815	0.97116	0.97104	0.999997	1695	0	-0.69815
PPP1CB	15	0.0059994	0.033756	0.873544	52	8	-0.62576	0.68075	0.81966	0.989644	1313	2	-0.62576
KTI12	15	0.0067421	0.037256	0.915498	53	8	-0.79171	0.84662	0.90827	0.999997	1523	1	-0.79171
NonTargeting_Human_0714	1	0.0068872	0.0067432	0.420969	54	1	-4.9137	0.99311	0.9933	0.999997	1726	0	-4.9137
CEBPZ	14	0.0084294	0.041884	0.94943	55	5	0.13085	0.11669	0.29579	0.965334	323	5	0.13085
EMC6	15	0.0089541	0.046177	0.975713	56	5	-0.32925	0.35763	0.60061	0.965334	792	2	-0.32925
GNB2L1	15	0.0091585	0.046999	0.975713	57	8	-0.74403	0.41393	0.64261	0.965932	888	2	-0.74403
OR5AR1	15	0.0092732	0.047446	0.975713	58	8	-0.74422	0.15473	0.36436	0.965334	403	5	-0.74422
ATP6V0D1	15	0.010465	0.052204	0.988905	59	7	-0.32834	0.99543	0.99525	0.999997	1728	0	-0.32834
CENPA	15	0.011689	0.057018	0.988905	60	4	0.098551	0.53823	0.73704	0.982717	1090	3	0.098551
STAG2	15	0.011846	0.057636	0.988905	61	8	-0.6804	0.93233	0.94043	0.999997	1624	1	-0.6804
NonTargeting_Human_0355	1	0.012331	0.012266	0.553127	62	1	-2.6092	0.98767	0.98782	0.999997	1717	0	-2.6092
TAF2	14	0.012699	0.060304	0.988905	63	5	-0.26767	0.56747	0.75212	0.986849	1129	1	-0.26767
NonTargeting_Human_0481	1	0.012826	0.012764	0.553127	64	1	-2.0381	0.98717	0.98733	0.999997	1716	0	-2.0381
EXOC4	15	0.013025	0.062337	0.988905	65	6	-0.12975	0.43554	0.65849	0.966998	920	3	-0.12975
NonTargeting_Human_0613	1	0.013073	0.012974	0.553127	66	1	-3.8083	0.98693	0.98708	0.999997	1715	0	-3.8083
PACRGL	15	0.013278	0.063419	0.988905	67	8	-0.63329	0.86939	0.91494	0.999997	1550	1	-0.63329
NDUFV1	15	0.014448	0.068273	0.988905	68	8	-0.60092	0.55264	0.74851	0.985242	1111	2	-0.60092
HSPE1	15	0.015358	0.071796	0.988905	69	5	0.038855	0.083635	0.23577	0.965334	251	5	0.038855
RAB5C	15	0.015436	0.07208	0.988905	70	6	-0.31436	0.99766	0.99756	0.999997	1734	0	-0.31436
CARS	15	0.01604	0.074419	0.988905	71	8	-0.51379	0.59064	0.77863	0.988967	1176	2	-0.51379
GTF2E1	15	0.016318	0.075591	0.988905	72	7	-0.22874	0.60837	0.78764	0.988967	1205	1	-0.22874
IL17RA	15	0.016364	0.075767	0.988905	73	6	-0.37754	0.9434	0.94697	0.999997	1642	1	-0.37754
TCP10	15	0.016573	0.076475	0.988905	74	3	0.59128	0.011642	0.05179	0.934298	74	7	0.59128
DDX4	15	0.018344	0.083283	0.988905	75	8	-0.61292	0.82426	0.90116	0.999997	1500	2	-0.61292
SYS1	15	0.01838	0.083374	0.988905	76	8	-0.62355	0.97575	0.97578	0.999997	1703	0	-0.62355
TBC1D25	15	0.019006	0.085787	0.988905	77	7	-0.4752	0.1525	0.36036	0.965334	397	3	-0.4752
PRMT1	15	0.019315	0.087005	0.988905	78	7	-0.26626	0.31806	0.5608	0.965334	710	2	-0.26626
CCDC115	15	0.019667	0.088307	0.988905	79	6	-0.49703	0.98946	0.98933	0.999997	1721	0	-0.49703
PIK3R4	14	0.019749	0.084994	0.988905	80	6	-0.20386	0.094198	0.25149	0.965334	275	2	-0.20386
CDK12	14	0.019974	0.085719	0.988905	81	5	-0.0080068	0.28062	0.51612	0.965334	643	2	-0.0080068
PAM16	15	0.020221	0.090284	0.988905	82	3	-0.2015	0.72177	0.84026	0.995862	1360	2	-0.2015
TRAPPC1	15	0.020223	0.090301	0.988905	83	8	-0.51986	0.85087	0.90943	0.999997	1529	1	-0.51986
hsa-mir-550a-1	9	0.02023	0.0743	0.988905	84	4	-0.31571	0.23002	0.4078	0.965334	555	2	-0.31571
CTR9	15	0.020463	0.091258	0.988905	85	3	0.50103	0.021695	0.086285	0.948682	101	6	0.50103
WRB	15	0.020854	0.092765	0.988905	86	8	-0.59765	0.63963	0.80102	0.988967	1257	2	-0.59765
TMEM258	15	0.021021	0.093366	0.988905	87	7	-0.51711	0.97321	0.97328	0.999997	1700	0	-0.51711
DNASE2	15	0.021247	0.094181	0.988905	88	5	0.0014032	0.13088	0.3225	0.965334	352	4	0.0014032
PIGS	15	0.021434	0.094855	0.988905	89	3	0.21213	0.24678	0.47782	0.965334	579	4	0.21213
hsa-mir-3670-1	5	0.022185	0.065634	0.988905	90	3	-0.99997	0.8028	0.80266	0.988967	1474	0	-0.99997
ATP6V1H	15	0.022646	0.09954	0.988905	91	3	0.46708	0.02025	0.081924	0.948682	93	5	0.46708
CSNK2A2	14	0.023096	0.09579	0.988905	92	7	-0.57826	0.99817	0.99803	0.999997	1735	0	-0.57826
hsa-mir-6831	12	0.023111	0.091921	0.988905	93	3	-0.069549	0.51705	0.68886	0.976056	1059	1	-0.069549
HNF4A	15	0.023327	0.10204	0.988905	94	7	-0.31955	0.31979	0.56277	0.965334	713	1	-0.31955
SMNDC1	15	0.023356	0.10217	0.988905	95	8	-0.62933	0.22959	0.45733	0.965334	553	2	-0.62933
NR2C2AP	15	0.024284	0.10551	0.988905	96	8	-0.58746	0.96655	0.96642	0.999997	1682	0	-0.58746
NonTargeting_Human_0932	1	0.024538	0.024619	0.867961	97	1	-2.2451	0.97546	0.97523	0.999997	1702	0	-2.2451
FER	15	0.025108	0.10812	0.988905	98	7	-0.4608	0.77797	0.87175	0.999997	1440	2	-0.4608
NonTargeting_Human_0438	1	0.025198	0.025361	0.867961	99	1	-1.8551	0.9748	0.97453	0.999997	1701	0	-1.8551
CWC22	15	0.025517	0.10924	0.988905	100	6	-0.35825	0.62751	0.79609	0.988967	1236	1	-0.35825
AMTN	14	0.02567	0.10413	0.988905	101	2	-0.10862	0.43357	0.64826	0.965932	919	3	-0.10862
ARFRP1	14	0.025796	0.10455	0.988905	102	7	-0.47136	0.75821	0.85632	0.996179	1418	2	-0.47136
INTS8	14	0.025938	0.10502	0.988905	103	5	0.021195	0.0089292	0.040405	0.902682	62	4	0.021195
ARL8A	15	0.026951	0.11333	0.988905	104	6	-0.34767	0.53246	0.7323	0.982717	1083	2	-0.34767
CPSF4	15	0.026954	0.11334	0.988905	105	7	-0.44434	0.10217	0.27081	0.965334	289	3	-0.44434
EXT1	15	0.027076	0.11374	0.988905	106	6	-0.50723	0.73971	0.85002	0.996179	1389	1	-0.50723
SRP14	15	0.028147	0.11699	0.988905	107	6	-0.30955	0.26384	0.49745	0.965334	604	4	-0.30955
NonTargeting_Human_0719	1	0.02825	0.028465	0.867961	108	1	-1.3629	0.97175	0.97161	0.999997	1697	0	-1.3629
NonTargeting_Human_0655	1	0.02858	0.028754	0.867961	109	1	-1.8281	0.97142	0.97133	0.999997	1696	0	-1.8281
VPS29	15	0.028683	0.11857	0.988905	110	3	0.27096	0.093507	0.2546	0.965334	270	5	0.27096
EIF3C	15	0.028747	0.11885	0.988905	111	6	0.31447	0.037011	0.12882	0.948682	153	3	0.31447
ELF4	15	0.028765	0.11891	0.988905	112	6	0.0791	0.20797	0.43145	0.965334	511	1	0.0791
NonTargeting_Human_0538	1	0.02891	0.029026	0.867961	113	1	-2.346	0.97109	0.97097	0.999997	1694	0	-2.346
NonTargeting_Human_0315	1	0.029322	0.029479	0.867961	114	1	-1.9237	0.97068	0.97063	0.999997	1693	0	-1.9237
PIK3C3	15	0.029347	0.12049	0.988905	115	6	-0.31919	0.36361	0.60522	0.965334	799	3	-0.31919
NonTargeting_Human_0722	1	0.029404	0.029564	0.867961	116	1	-2.406	0.9706	0.97049	0.999997	1692	0	-2.406
STARD4	15	0.029735	0.12175	0.988905	117	4	-0.002717	0.15319	0.36152	0.965334	401	5	-0.002717
NonTargeting_Human_0386	1	0.030312	0.03055	0.867961	118	1	-2.4429	0.96969	0.96958	0.999997	1691	0	-2.4429
NonTargeting_Human_0783	1	0.030394	0.030623	0.867961	119	1	-2.2231	0.96961	0.96948	0.999997	1690	0	-2.2231
NonTargeting_Human_0892	1	0.030889	0.031105	0.867961	120	1	-2.5691	0.96911	0.96898	0.999997	1689	0	-2.5691
NonTargeting_Human_0864	1	0.032374	0.032561	0.871362	121	1	-1.3896	0.96763	0.96762	0.999997	1685	0	-1.3896
ARPC4	15	0.032944	0.13092	0.988905	122	7	-0.44801	0.68107	0.8198	0.989644	1315	2	-0.44801
PPP1R8	15	0.033416	0.13238	0.988905	123	4	-0.31376	0.034619	0.12221	0.948682	146	5	-0.31376
ARGLU1	15	0.033443	0.13245	0.988905	124	7	-0.57714	0.30496	0.54597	0.965334	687	2	-0.57714
NonTargeting_Human_0254	1	0.033941	0.033982	0.873544	125	1	-2.3789	0.96606	0.96597	0.999997	1680	0	-2.3789
CCT6A	15	0.034686	0.13574	0.988905	126	5	-0.11275	0.03192	0.11516	0.948682	136	4	-0.11275
METAP1	15	0.035078	0.13686	0.988905	127	3	0.025701	0.11366	0.29227	0.965334	317	3	0.025701
NHLRC2	15	0.035878	0.13921	0.988905	128	2	-0.060124	0.8387	0.90638	0.999997	1518	1	-0.060124
NonTargeting_Human_0635	1	0.036663	0.036899	0.915498	129	1	-2.2551	0.96334	0.96327	0.999997	1677	0	-2.2551
USP22	15	0.037021	0.14246	0.988905	130	7	-0.075108	0.58351	0.77303	0.988967	1161	2	-0.075108
RPS8	15	0.037078	0.14261	0.988905	131	2	1.1256	0.039055	0.13465	0.948682	158	5	1.1256
AGPAT1	15	0.037244	0.14305	0.988905	132	5	-0.17768	0.90874	0.92897	0.999997	1597	1	-0.17768
NonTargeting_Human_0520	1	0.037323	0.037607	0.915498	133	1	-1.9799	0.96268	0.96266	0.999997	1676	0	-1.9799
NonTargeting_Human_0024	1	0.037405	0.037709	0.915498	134	1	-1.8725	0.96259	0.96262	0.999997	1675	0	-1.8725
FAM126A	15	0.038271	0.14618	0.988905	135	2	0.25175	0.30187	0.54256	0.965334	678	4	0.25175
ERP44	14	0.03911	0.14646	0.988905	136	1	0.96366	0.0018823	0.010618	0.691192	24	8	0.96366
NonTargeting_Human_0301	1	0.039385	0.039703	0.94943	137	1	-2.0364	0.96062	0.96047	0.999997	1672	0	-2.0364
PDE1A	15	0.039464	0.14963	0.988905	138	4	-0.26767	0.023856	0.092861	0.948682	107	3	-0.26767
RBM3	15	0.039837	0.15079	0.988905	139	4	0.16724	0.050431	0.16539	0.963532	177	5	0.16724
NonTargeting_Human_0074	1	0.039962	0.040224	0.94943	140	1	-1.4678	0.96004	0.9598	0.999997	1671	0	-1.4678
DDX52	15	0.039988	0.15129	0.988905	141	3	-0.20617	0.2821	0.51907	0.965334	649	4	-0.20617
KIAA1432	14	0.040222	0.14987	0.988905	142	6	-0.4251	0.13758	0.32909	0.965334	371	2	-0.4251
VPS72	15	0.040468	0.15265	0.988905	143	7	-0.47195	0.57056	0.76285	0.986849	1136	2	-0.47195
MGEA5	15	0.040655	0.1532	0.988905	144	1	0.41104	0.088508	0.24513	0.965334	263	5	0.41104
NonTargeting_Human_0213	1	0.040952	0.041232	0.94943	145	1	-1.047	0.95905	0.95877	0.999997	1670	0	-1.047
SPDYE1	15	0.041009	0.15423	0.988905	146	7	-0.2038	0.96133	0.9612	0.999997	1674	1	-0.2038
RICTOR	15	0.041693	0.15631	0.988905	147	7	-0.54896	0.63772	0.80025	0.988967	1255	1	-0.54896
NonTargeting_Human_0435	1	0.041942	0.042314	0.94943	148	1	-1.6746	0.95806	0.95785	0.999997	1668	0	-1.6746
GFER	15	0.041988	0.15718	0.988905	149	6	0.10842	0.61502	0.79054	0.988967	1213	2	0.10842
NonTargeting_Human_0998	1	0.042189	0.042541	0.94943	150	1	-1.4276	0.95781	0.9576	0.999997	1667	0	-1.4276
NonTargeting_Human_0132	1	0.042519	0.042909	0.94943	151	1	-1.6561	0.95748	0.95727	0.999997	1666	0	-1.6561
PAGE4	15	0.042582	0.1588	0.988905	152	5	-0.31096	0.75743	0.85995	0.996322	1416	2	-0.31096
CAND1	15	0.043197	0.16037	0.988905	153	7	-0.21867	0.24449	0.47517	0.965334	574	2	-0.21867
SREBF1	15	0.043468	0.1612	0.988905	154	7	-0.25031	0.13861	0.3358	0.965334	372	3	-0.25031
CMTR1	15	0.043536	0.16143	0.988905	155	7	-0.47022	0.0082397	0.038899	0.902682	59	4	-0.47022
CNTN6	15	0.043603	0.16159	0.988905	156	7	-0.50675	0.58972	0.77785	0.988967	1172	3	-0.50675
NonTargeting_Human_0031	1	0.044004	0.044433	0.970854	157	1	-2.0104	0.956	0.95569	0.999997	1665	0	-2.0104
TMEM134	15	0.044136	0.16303	0.988905	158	7	-0.44232	0.34278	0.58893	0.965334	772	4	-0.44232
SEC61B	15	0.044563	0.16412	0.988905	159	6	-0.16667	0.89666	0.92418	0.999997	1584	1	-0.16667
SNRPD1	14	0.045212	0.16459	0.988905	160	4	0.39268	0.0053563	0.025531	0.902682	41	4	0.39268
NonTargeting_Human_0369	1	0.045323	0.045854	0.975713	161	1	-1.75	0.95468	0.95433	0.999997	1664	0	-1.75
EXOC8	15	0.04576	0.16745	0.988905	162	7	-0.5227	0.1667	0.38118	0.965334	429	1	-0.5227
hsa-mir-1976	12	0.046259	0.15715	0.988905	163	5	-0.25118	0.11813	0.27849	0.965334	328	2	-0.25118
CTDP1	15	0.046437	0.16942	0.988905	164	7	-0.26725	0.73829	0.84919	0.996179	1388	1	-0.26725
TAF1	13	0.046455	0.16079	0.988905	165	4	-0.17832	0.98884	0.98862	0.999997	1720	0	-0.17832
INSR	14	0.046484	0.16831	0.988905	166	6	-0.36325	0.66951	0.80337	0.988967	1297	2	-0.36325
RBBP5	15	0.046504	0.1696	0.988905	167	7	-0.55232	0.0087365	0.040796	0.902682	61	3	-0.55232
NonTargeting_Human_0229	1	0.046561	0.047004	0.975713	168	1	-0.89233	0.95344	0.95306	0.999997	1660	0	-0.89233
NAA10	14	0.047455	0.17106	0.988905	169	7	-0.39701	0.13276	0.32257	0.965334	358	3	-0.39701
NonTargeting_Human_0570	1	0.047715	0.048301	0.981752	170	1	-1.4754	0.95228	0.95203	0.999997	1656	0	-1.4754
SSX2	15	0.047818	0.17325	0.988905	171	4	0.34656	0.96847	0.96835	0.999997	1686	0	0.34656
TRIAP1	15	0.04791	0.17354	0.988905	172	7	-0.31894	0.80463	0.88795	0.999997	1479	1	-0.31894
TMOD2	15	0.048362	0.17462	0.988905	173	4	-0.033284	0.78401	0.87519	0.999997	1449	2	-0.033284
RUVBL1	15	0.04861	0.17528	0.988905	174	6	0.34915	0.0059054	0.029785	0.902682	44	5	0.34915
FBXL5	15	0.049207	0.17673	0.988905	175	6	-0.23288	0.41982	0.64702	0.965932	895	3	-0.23288
RABIF	15	0.049796	0.17817	0.988905	176	7	-0.55238	0.99972	0.99968	0.999997	1741	0	-0.55238
GIGYF2	15	0.049935	0.17861	0.988905	177	3	-0.12677	0.75017	0.85573	0.996179	1407	2	-0.12677
NonTargeting_Human_0389	1	0.050767	0.051434	0.988905	178	1	-1.9075	0.94923	0.94892	0.999997	1652	0	-1.9075
NonTargeting_Human_0909	1	0.051344	0.052017	0.988905	179	1	-1.5743	0.94866	0.94833	0.999997	1651	0	-1.5743
NonTargeting_Human_0170	1	0.051757	0.052431	0.988905	180	1	-1.8833	0.94824	0.94793	0.999997	1649	0	-1.8833
NonTargeting_Human_0738	1	0.052252	0.052855	0.988905	181	1	-1.9827	0.94775	0.94742	0.999997	1648	0	-1.9827
SPDYE2	15	0.052764	0.18629	0.988905	182	7	-0.52079	0.38921	0.62417	0.965334	844	1	-0.52079
RNMT	15	0.053019	0.18688	0.988905	183	4	-0.077021	0.93892	0.94414	0.999997	1633	1	-0.077021
NonTargeting_Human_0496	1	0.053077	0.053518	0.988905	184	1	-1.7269	0.94692	0.94658	0.999997	1647	0	-1.7269
NonTargeting_Human_0716	1	0.053736	0.054243	0.988905	185	1	-1.7864	0.94626	0.9459	0.999997	1645	0	-1.7864
DET1	15	0.053958	0.18957	0.988905	186	4	-0.2355	0.31139	0.5532	0.965334	699	2	-0.2355
EXOC1	15	0.054163	0.19013	0.988905	187	6	0.0056617	0.99268	0.99251	0.999997	1723	0	0.0056617
SRCAP	15	0.054332	0.19063	0.988905	188	6	-0.21131	0.037078	0.12897	0.948682	154	3	-0.21131
FAM134C	15	0.054903	0.19209	0.988905	189	4	0.10703	0.34248	0.58857	0.965334	770	4	0.10703
NonTargeting_Human_0694	1	0.054974	0.055433	0.988905	190	1	-1.6835	0.94503	0.94468	0.999997	1644	0	-1.6835
C9orf41	15	0.055006	0.19242	0.988905	191	4	0.26096	0.0021514	0.012419	0.692296	26	5	0.26096
MFAP1	14	0.055667	0.19248	0.988905	192	3	0.79043	0.08129	0.22565	0.965334	248	5	0.79043
NonTargeting_Human_0443	1	0.055881	0.056373	0.988905	193	1	-1.9528	0.94412	0.94373	0.999997	1643	0	-1.9528
YPEL1	15	0.056422	0.19609	0.988905	194	5	-0.0057496	0.081776	0.23247	0.965334	249	5	-0.0057496
NonTargeting_Human_0049	1	0.057036	0.057596	0.988905	195	1	-1.8588	0.94296	0.94267	0.999997	1640	0	-1.8588
NonTargeting_Human_0471	1	0.057201	0.05776	0.988905	196	1	-1.049	0.9428	0.94254	0.999997	1639	0	-1.049
MED12	15	0.057451	0.1987	0.988905	197	5	0.29973	0.23792	0.46765	0.965334	565	3	0.29973
NonTargeting_Human_0812	1	0.057695	0.058214	0.988905	198	1	-1.8872	0.9423	0.94213	0.999997	1637	0	-1.8872
TNFAIP3	15	0.058353	0.20109	0.988905	199	5	-0.36486	0.45759	0.6747	0.971649	955	1	-0.36486
CAB39	15	0.058875	0.20249	0.988905	200	7	0.29786	0.042394	0.14418	0.963532	163	6	0.29786
NonTargeting_Human_0033	1	0.059015	0.059556	0.988905	201	1	-1.5398	0.94098	0.94066	0.999997	1636	0	-1.5398
DENND4A	15	0.060096	0.20551	0.988905	202	7	-0.53579	0.050132	0.16463	0.963532	175	1	-0.53579
NonTargeting_Human_0708	1	0.060417	0.06108	0.988905	203	1	-1.818	0.93958	0.93931	0.999997	1634	0	-1.818
GZF1	15	0.060595	0.20674	0.988905	204	7	-0.45751	0.25958	0.49228	0.965334	596	2	-0.45751
RANBP1	15	0.061526	0.20914	0.988905	205	7	-0.46261	0.99883	0.99876	0.999997	1740	0	-0.46261
USP50	15	0.06281	0.21246	0.988905	206	6	-0.48883	0.35784	0.60081	0.965334	793	3	-0.48883
NonTargeting_Human_0861	1	0.062892	0.063374	0.988905	207	1	-1.42	0.93711	0.93682	0.999997	1631	0	-1.42
NonTargeting_Human_0792	1	0.063222	0.063697	0.988905	208	1	-1.2321	0.93678	0.93648	0.999997	1630	0	-1.2321
WRNIP1	14	0.063418	0.20916	0.988905	209	6	-0.28642	0.17508	0.37976	0.965334	441	3	-0.28642
NonTargeting_Human_0228	1	0.063552	0.064082	0.988905	210	1	-1.0065	0.93645	0.93621	0.999997	1629	0	-1.0065
ZNF646	15	0.063862	0.21504	0.988905	211	7	-0.51599	0.59097	0.77895	0.988967	1178	3	-0.51599
HNRNPM	15	0.065347	0.21888	0.988905	212	4	0.0052632	0.11739	0.29893	0.965334	326	4	0.0052632
NonTargeting_Human_0737	1	0.066274	0.06697	0.988905	213	1	-1.5821	0.93373	0.93356	0.999997	1627	0	-1.5821
MED27	15	0.066508	0.22193	0.988905	214	4	0.15172	0.04722	0.15703	0.963532	169	4	0.15172
NCBP2	14	0.066513	0.21575	0.988905	215	6	0.13253	0.17933	0.38541	0.965334	448	4	0.13253
NonTargeting_Human_0199	1	0.066521	0.06722	0.988905	216	1	-1.7592	0.93348	0.93338	0.999997	1626	0	-1.7592
NonTargeting_Human_0509	1	0.066686	0.067378	0.988905	217	1	-1.5529	0.93331	0.93322	0.999997	1625	0	-1.5529
C12orf43	15	0.067531	0.22432	0.988905	218	5	-0.069507	0.67282	0.81602	0.989313	1302	2	-0.069507
NRBP1	15	0.068196	0.22607	0.988905	219	7	-0.46657	0.80759	0.88976	0.999997	1483	2	-0.46657
DHX36	14	0.068989	0.22109	0.988905	220	6	-0.42109	0.095908	0.25502	0.965334	278	1	-0.42109
FAM57B	15	0.070254	0.23116	0.988905	221	5	0.08371	0.17589	0.39213	0.965334	442	3	0.08371
CPSF3L	15	0.070366	0.2314	0.988905	222	4	-0.41953	0.43625	0.65901	0.966998	923	3	-0.41953
hsa-mir-6817	13	0.070795	0.21931	0.988905	223	6	-0.2487	0.64546	0.77862	0.988967	1263	1	-0.2487
NonTargeting_Human_0847	1	0.07081	0.071468	0.988905	224	1	-1.119	0.92919	0.92923	0.999997	1623	0	-1.119
NonTargeting_Human_0303	1	0.071057	0.071683	0.988905	225	1	-1.0156	0.92894	0.92894	0.999997	1621	0	-1.0156
NonTargeting_Human_0705	1	0.0718	0.072436	0.988905	226	1	-0.76835	0.9282	0.92827	0.999997	1620	0	-0.76835
NonTargeting_Human_0307	1	0.073202	0.073898	0.988905	227	1	-1.5293	0.9268	0.92696	0.999997	1619	0	-1.5293
NonTargeting_Human_0280	1	0.073944	0.074583	0.988905	228	1	-1.1915	0.92606	0.92628	0.999997	1617	0	-1.1915
NonTargeting_Human_0750	1	0.074027	0.074696	0.988905	229	1	-1.7036	0.92597	0.92619	0.999997	1616	0	-1.7036
INTS6	15	0.074597	0.24182	0.988905	230	5	0.81146	0.014876	0.06432	0.948682	81	6	0.81146
ASB16	15	0.074853	0.24251	0.988905	231	4	-0.098126	0.82505	0.90168	0.999997	1502	2	-0.098126
NonTargeting_Human_0969	1	0.074934	0.075631	0.988905	232	1	-1.6755	0.92507	0.92541	0.999997	1614	0	-1.6755
KDM6A	15	0.075003	0.2429	0.988905	233	6	-0.53838	0.87765	0.91793	0.999997	1560	1	-0.53838
SMC1A	15	0.075747	0.24447	0.988905	234	5	-0.18164	0.17862	0.39567	0.965334	445	2	-0.18164
NonTargeting_Human_0607	1	0.075841	0.076628	0.988905	235	1	-1.6534	0.92416	0.92449	0.999997	1613	0	-1.6534
CCDC169-SOHLH2	15	0.075998	0.24505	0.988905	236	6	0.45336	0.34007	0.58582	0.965334	763	3	0.45336
NDUFB10	14	0.077331	0.23931	0.988905	237	5	0.33573	0.15255	0.34945	0.965334	398	2	0.33573
SLC12A9	15	0.077813	0.24875	0.988905	238	3	0.15353	0.11075	0.28669	0.965334	309	1	0.15353
WDR82	14	0.078402	0.24145	0.988905	239	2	0.92733	0.00035546	0.0024271	0.413779	9	7	0.92733
NonTargeting_Human_0487	1	0.079141	0.079947	0.988905	240	1	-1.3445	0.92086	0.92115	0.999997	1609	0	-1.3445
NonTargeting_Human_0379	1	0.079306	0.080134	0.988905	241	1	-1.4873	0.92069	0.92097	0.999997	1608	0	-1.4873
NonTargeting_Human_0753	1	0.080048	0.080944	0.988905	242	1	-1.3243	0.91995	0.92022	0.999997	1607	0	-1.3243
SULT1A2	15	0.080232	0.25365	0.988905	243	6	-0.077112	0.5564	0.75146	0.986849	1114	1	-0.077112
COG5	14	0.080746	0.24637	0.988905	244	5	-0.22887	0.21608	0.43357	0.965334	528	1	-0.22887
FURIN	15	0.082053	0.2573	0.988905	245	4	-0.35734	0.7615	0.86235	0.997605	1424	2	-0.35734
NonTargeting_Human_0452	1	0.08244	0.083391	0.988905	246	1	-1.2581	0.91756	0.91791	0.999997	1605	0	-1.2581
NonTargeting_Human_0473	1	0.0831	0.084093	0.988905	247	1	-1.5212	0.9169	0.91723	0.999997	1604	0	-1.5212
CERS2	15	0.083642	0.26023	0.988905	248	6	-0.33978	0.92295	0.93559	0.999997	1611	1	-0.33978
NonTargeting_Human_0887	1	0.085822	0.086591	0.988905	249	1	-1.0552	0.91418	0.91447	0.999997	1603	0	-1.0552
NonTargeting_Human_0582	1	0.087389	0.08807	0.988905	250	1	-1.5243	0.91261	0.91294	0.999997	1602	0	-1.5243
DEXI	15	0.087789	0.26839	0.988905	251	6	-0.25969	0.031312	0.11351	0.948682	133	5	-0.25969
NonTargeting_Human_0400	1	0.087966	0.088619	0.988905	252	1	-1.5514	0.91203	0.91227	0.999997	1601	0	-1.5514
hsa-mir-6859-1	13	0.087966	0.25843	0.988905	253	4	-0.27177	0.0047085	0.022903	0.902682	37	4	-0.27177
CCDC53	15	0.088684	0.27018	0.988905	254	3	0.14025	0.23966	0.4695	0.965334	568	4	0.14025
NonTargeting_Human_0273	1	0.088708	0.089299	0.988905	255	1	-1.4843	0.91129	0.9116	0.999997	1600	0	-1.4843
WARS	15	0.08927	0.2714	0.988905	256	6	-0.11731	0.90966	0.92932	0.999997	1598	1	-0.11731
NonTargeting_Human_0844	1	0.089533	0.090148	0.988905	257	1	-1.4988	0.91047	0.9107	0.999997	1599	0	-1.4988
TADA2A	15	0.090683	0.27421	0.988905	258	5	0.083995	0.3274	0.57127	0.965334	732	3	0.083995
VPS33A	15	0.091322	0.27533	0.988905	259	5	-0.083901	0.69119	0.82473	0.994227	1326	1	-0.083901
LACRT	15	0.091588	0.2758	0.988905	260	6	-0.26832	0.6777	0.81835	0.989644	1309	1	-0.26832
VPS35	15	0.09171	0.27603	0.988905	261	4	0.013988	0.32409	0.56766	0.965334	724	2	0.013988
RBM4B	15	0.091813	0.27626	0.988905	262	4	0.83385	0.0052795	0.027236	0.902682	40	7	0.83385
NonTargeting_Human_0778	1	0.091925	0.092641	0.988905	263	1	-1.2246	0.90807	0.90846	0.999997	1595	0	-1.2246
PFN1	15	0.092415	0.27751	0.988905	264	6	-0.3545	0.9896	0.98948	0.999997	1722	0	-0.3545
TFAM	15	0.09397	0.28043	0.988905	265	4	0.085401	0.083977	0.23653	0.965334	252	3	0.085401
GSK3B	15	0.095097	0.28266	0.988905	266	2	0.74503	0.027367	0.10265	0.948682	114	6	0.74503
NonTargeting_Human_0295	1	0.095307	0.096203	0.988905	267	1	-1.3914	0.90469	0.905	0.999997	1593	0	-1.3914
NonTargeting_Human_0102	1	0.095472	0.096322	0.988905	268	1	-1.3439	0.90453	0.90484	0.999997	1592	0	-1.3439
NonTargeting_Human_0479	1	0.095637	0.096441	0.988905	269	1	-1.4373	0.90436	0.90472	0.999997	1591	0	-1.4373
NonTargeting_Human_0279	1	0.095802	0.096583	0.988905	270	1	-1.3357	0.9042	0.90457	0.999997	1590	0	-1.3357
AGAP4	15	0.097349	0.28701	0.988905	271	3	-0.018548	0.052922	0.17205	0.963532	189	5	-0.018548
NonTargeting_Human_0419	1	0.097451	0.098254	0.988905	272	1	-1.2667	0.90255	0.90301	0.999997	1589	0	-1.2667
RALGAPB	15	0.097516	0.28728	0.988905	273	4	-0.18138	0.0075732	0.036299	0.902682	54	6	-0.18138
NonTargeting_Human_0330	1	0.097534	0.098339	0.988905	274	1	-1.1291	0.90247	0.90294	0.999997	1588	0	-1.1291
FUNDC2	15	0.099051	0.29026	0.988905	275	6	-0.51962	0.50618	0.71193	0.982677	1035	3	-0.51962
WDHD1	15	0.099062	0.29027	0.988905	276	5	0.2313	0.025065	0.096181	0.948682	110	3	0.2313
NonTargeting_Human_0218	1	0.099348	0.10026	0.988905	277	1	-0.83042	0.90065	0.90121	0.999997	1587	0	-0.83042
TFRC	14	0.099581	0.28539	0.988905	278	3	-0.047039	0.50378	0.70649	0.981106	1025	3	-0.047039
NID1	15	0.099595	0.29128	0.988905	279	1	0.18429	0.035378	0.12442	0.948682	148	4	0.18429
PDCD10	15	0.099696	0.29146	0.988905	280	5	-0.16816	0.078044	0.22491	0.965334	235	3	-0.16816
LIMS3	15	0.10072	0.29341	0.988905	281	1	0.3991	0.24994	0.48142	0.965334	582	4	0.3991
GPN3	15	0.101	0.29395	0.988905	282	3	-0.017441	0.020569	0.082898	0.948682	94	4	-0.017441
NonTargeting_Human_0232	1	0.10149	0.10264	0.988905	283	1	-1.2183	0.89851	0.8988	0.999997	1586	0	-1.2183
GTF3C4	15	0.10278	0.29742	0.988905	284	4	-0.11125	0.0048315	0.025333	0.902682	39	4	-0.11125
TAF7	15	0.10349	0.29869	0.988905	285	6	-0.5673	0.88344	0.9198	0.999997	1572	1	-0.5673
NonTargeting_Human_0136	1	0.10355	0.10469	0.988905	286	1	-1.2417	0.89645	0.89674	0.999997	1583	0	-1.2417
KRTAP13-2	15	0.10397	0.29963	0.988905	287	5	-0.14172	0.43268	0.65641	0.966998	917	3	-0.14172
SUMO2	14	0.10406	0.29457	0.988905	288	6	-0.26383	0.018885	0.073513	0.948682	88	1	-0.26383
GAPDH	15	0.10407	0.29983	0.988905	289	2	0.24537	0.2721	0.50728	0.965334	627	1	0.24537
STAM2	15	0.10437	0.30043	0.988905	290	5	-0.041391	0.14145	0.34078	0.965334	375	4	-0.041391
PPIAL4A	15	0.10458	0.30082	0.988905	291	6	-0.36808	0.74939	0.85531	0.996179	1406	2	-0.36808
PIP5K1A	15	0.10475	0.30113	0.988905	292	5	0.25164	0.33201	0.57641	0.965334	745	4	0.25164
PFDN2	14	0.10481	0.29611	0.988905	293	3	0.19037	0.17601	0.38092	0.965334	443	3	0.19037
NonTargeting_Human_0809	1	0.1052	0.10631	0.988905	294	1	-1.3611	0.8948	0.89511	0.999997	1582	0	-1.3611
C10orf53	15	0.10626	0.30398	0.988905	295	6	-0.22514	0.7521	0.85694	0.996179	1409	2	-0.22514
BTF3	15	0.10657	0.30447	0.988905	296	6	0.16787	0.030295	0.1108	0.948682	130	4	0.16787
NonTargeting_Human_0908	1	0.10727	0.10844	0.988905	297	1	-1.3919	0.89273	0.89301	0.999997	1581	0	-1.3919
NonTargeting_Human_0542	1	0.10735	0.10855	0.988905	298	1	-1.3275	0.89265	0.89293	0.999997	1580	0	-1.3275
ANKRD36	15	0.1078	0.30676	0.988905	299	6	-0.30505	0.97187	0.97191	0.999997	1698	0	-0.30505
TMEM67	15	0.10886	0.30878	0.988905	300	4	0.078933	0.13267	0.32569	0.965334	357	3	0.078933
NonTargeting_Human_0895	1	0.11073	0.112	0.988905	301	1	-1.3106	0.88927	0.88954	0.999997	1579	0	-1.3106
NonTargeting_Human_0873	1	0.11081	0.11211	0.988905	302	1	-0.85333	0.88919	0.88938	0.999997	1578	0	-0.85333
CEP120	15	0.11085	0.31238	0.988905	303	5	0.32259	0.24544	0.47622	0.965334	576	3	0.32259
NonTargeting_Human_0740	1	0.11147	0.11274	0.988905	304	1	-1.3539	0.88853	0.88872	0.999997	1577	0	-1.3539
NonTargeting_Human_0994	1	0.1123	0.11351	0.988905	305	1	-1.2084	0.8877	0.88795	0.999997	1576	0	-1.2084
MTFP1	15	0.11366	0.31775	0.988905	306	3	-0.11447	0.94306	0.94674	0.999997	1641	1	-0.11447
INTS12	15	0.11406	0.31858	0.988905	307	4	0.26909	0.03272	0.11721	0.948682	140	4	0.26909
GTF2H2	15	0.11407	0.31858	0.988905	308	5	-0.011752	0.027776	0.10377	0.948682	118	5	-0.011752
NonTargeting_Human_0890	1	0.11419	0.11537	0.988905	309	1	-0.76931	0.88581	0.88598	0.999997	1575	0	-0.76931
CDC14A	15	0.11487	0.32015	0.988905	310	5	0.0032813	0.61765	0.79173	0.988967	1218	2	0.0032813
GAGE12B	15	0.11498	0.32038	0.988905	311	4	0.10661	0.073445	0.21571	0.965271	227	3	0.10661
FAM219B	15	0.11504	0.32048	0.988905	312	6	-0.33269	0.65369	0.80726	0.989313	1276	2	-0.33269
CIAO1	15	0.11578	0.3219	0.988905	313	4	-0.47521	0.97283	0.9729	0.999997	1699	0	-0.47521
CCZ1	15	0.11628	0.32273	0.988905	314	4	-0.2411	0.53386	0.73348	0.982717	1084	2	-0.2411
NonTargeting_Human_0541	1	0.11634	0.11747	0.988905	315	1	-1.0147	0.88366	0.88355	0.999997	1574	0	-1.0147
DAZ1	15	0.11637	0.32292	0.988905	316	5	-0.35063	0.95284	0.954	0.999997	1658	1	-0.35063
NonTargeting_Human_0678	1	0.11758	0.11876	0.988905	317	1	-1.2161	0.88242	0.88239	0.999997	1570	0	-1.2161
NonTargeting_Human_0133	1	0.11824	0.11945	0.988905	318	1	-1.2311	0.88176	0.88172	0.999997	1569	0	-1.2311
THOC6	15	0.11837	0.32659	0.988905	319	6	-0.48379	0.92507	0.93653	0.999997	1615	1	-0.48379
KAT8	15	0.11848	0.32682	0.988905	320	3	0.038568	0.07939	0.22745	0.965334	240	4	0.038568
NonTargeting_Human_0034	1	0.11848	0.11969	0.988905	321	1	-1.2763	0.88152	0.88146	0.999997	1567	0	-1.2763
SORT1	15	0.11853	0.32693	0.988905	322	6	-0.34133	0.21422	0.43895	0.965334	522	2	-0.34133
NUDT17	15	0.1187	0.32731	0.988905	323	6	-0.25922	0.22394	0.45067	0.965334	540	3	-0.25922
C2CD4A	15	0.11906	0.32805	0.988905	324	5	0.013909	0.3321	0.57653	0.965334	746	3	0.013909
NonTargeting_Human_0088	1	0.11939	0.12056	0.988905	325	1	-1.15	0.88061	0.88045	0.999997	1566	0	-1.15
NonTargeting_Human_0020	1	0.11947	0.12066	0.988905	326	1	-0.71148	0.88053	0.88038	0.999997	1565	0	-0.71148
NonTargeting_Human_0418	1	0.11956	0.12076	0.988905	327	1	-1.2245	0.88044	0.88028	0.999997	1564	0	-1.2245
NonTargeting_Human_0410	1	0.12005	0.12132	0.988905	328	1	-1.2854	0.87995	0.8798	0.999997	1563	0	-1.2854
FZR1	15	0.12055	0.33069	0.988905	329	5	-0.14043	0.99545	0.99526	0.999997	1729	0	-0.14043
NonTargeting_Human_0547	1	0.12129	0.1224	0.988905	330	1	-1.2371	0.87871	0.87847	0.999997	1562	0	-1.2371
NonTargeting_Human_0897	1	0.12195	0.1231	0.988905	331	1	-1.0438	0.87805	0.87779	0.999997	1561	0	-1.0438
MAP1S	15	0.12197	0.33325	0.988905	332	5	-0.32471	0.98223	0.98227	0.999997	1709	0	-0.32471
NonTargeting_Human_0428	1	0.12277	0.124	0.988905	333	1	-1.2346	0.87723	0.877	0.999997	1559	0	-1.2346
NonTargeting_Human_0267	1	0.12385	0.12506	0.988905	334	1	-0.79873	0.87615	0.87589	0.999997	1558	0	-0.79873
NonTargeting_Human_0788	1	0.12409	0.12535	0.988905	335	1	-0.99258	0.87591	0.87567	0.999997	1557	0	-0.99258
NonTargeting_Human_0493	1	0.12426	0.12546	0.988905	336	1	-1.1617	0.87574	0.87556	0.999997	1556	0	-1.1617
MEF2BNB	15	0.12471	0.33808	0.988905	337	6	-0.49037	0.074597	0.21804	0.965334	230	2	-0.49037
SCYL1	15	0.12503	0.33865	0.988905	338	6	-0.20458	0.32752	0.57134	0.965334	734	3	-0.20458
SQLE	15	0.12508	0.33875	0.988905	339	3	0.5754	0.022591	0.089095	0.948682	103	6	0.5754
MRPS21	15	0.1259	0.34018	0.988905	340	5	0.10833	0.39967	0.63206	0.965334	863	3	0.10833
PRR3	15	0.12633	0.34094	0.988905	341	5	-0.3599	0.42341	0.64956	0.965932	904	3	-0.3599
COMMD3	15	0.1264	0.34109	0.988905	342	5	0.18049	0.059015	0.18763	0.963532	202	5	0.18049
NonTargeting_Human_0291	1	0.1269	0.12796	0.988905	343	1	-0.9832	0.8731	0.87292	0.999997	1554	0	-0.9832
METTL17	15	0.12697	0.34209	0.988905	344	5	0.19285	0.23457	0.46364	0.965334	561	3	0.19285
RCC1	15	0.12699	0.34211	0.988905	345	5	-0.32379	0.38921	0.62417	0.965334	845	2	-0.32379
ARIH1	15	0.12724	0.34254	0.988905	346	4	0.13153	0.061353	0.1921	0.963532	208	2	0.13153
NonTargeting_Human_0958	1	0.12912	0.13017	0.988905	347	1	-0.81516	0.87088	0.87066	0.999997	1552	0	-0.81516
NonTargeting_Human_0437	1	0.13036	0.13131	0.988905	348	1	-1.092	0.86964	0.86939	0.999997	1551	0	-1.092
NonTargeting_Human_0423	1	0.13069	0.13168	0.988905	349	1	-0.89562	0.86931	0.8691	0.999997	1549	0	-0.89562
GDI2	15	0.13149	0.34996	0.988905	350	6	0.0059549	0.12724	0.31614	0.965334	344	3	0.0059549
NonTargeting_Human_0817	1	0.13152	0.13257	0.988905	351	1	-1.0679	0.86848	0.86837	0.999997	1547	0	-1.0679
DAP3	14	0.13354	0.35269	0.988905	352	5	-0.068208	0.067733	0.1978	0.963532	219	2	-0.068208
CDC73	15	0.13375	0.35429	0.988905	353	2	0.54784	0.046401	0.15492	0.963532	168	5	0.54784
MID1	15	0.13383	0.35445	0.988905	354	4	-0.19334	0.86865	0.91471	0.999997	1548	1	-0.19334
USP9X	15	0.13483	0.35603	0.988905	355	3	0.69352	0.0091059	0.042201	0.922092	63	7	0.69352
NonTargeting_Human_0272	1	0.13581	0.13685	0.988905	356	1	-0.95809	0.86419	0.8643	0.999204	1546	0	-0.95809
PTCHD4	15	0.13684	0.3593	0.988905	357	3	-0.073908	0.54948	0.74605	0.98348	1107	3	-0.073908
SVOP	15	0.13699	0.35955	0.988905	358	3	0.2912	0.026057	0.098865	0.948682	111	5	0.2912
NXPH2	15	0.13707	0.3597	0.988905	359	5	-0.18812	0.7219	0.84033	0.995862	1361	1	-0.18812
TBX6	15	0.1376	0.36067	0.988905	360	6	-0.25253	0.35566	0.59909	0.965334	784	3	-0.25253
NOP16	14	0.13858	0.36237	0.988905	361	4	0.25372	0.00040215	0.002682	0.413779	10	6	0.25372
NonTargeting_Human_0059	1	0.1391	0.14021	0.988905	362	1	-1.1084	0.8609	0.86101	0.996718	1544	0	-1.1084
VPS51	15	0.1397	0.36446	0.988905	363	6	-0.13654	0.05713	0.18287	0.963532	200	2	-0.13654
NonTargeting_Human_0462	1	0.14001	0.14102	0.988905	364	1	-1.0911	0.85999	0.8601	0.996322	1543	0	-1.0911
ATP11A	15	0.14047	0.36577	0.988905	365	5	0.090687	0.16709	0.38164	0.965334	431	3	0.090687
NonTargeting_Human_0075	1	0.14075	0.14182	0.988905	366	1	-1.1017	0.85925	0.85929	0.996322	1542	0	-1.1017
NonTargeting_Human_0928	1	0.14191	0.14303	0.988905	367	1	-0.96484	0.85809	0.85817	0.996322	1541	0	-0.96484
NonTargeting_Human_0262	1	0.1429	0.144	0.988905	368	1	-0.81949	0.8571	0.85712	0.996179	1540	0	-0.81949
NonTargeting_Human_0880	1	0.14315	0.14429	0.988905	369	1	-1.0957	0.85685	0.85685	0.996179	1538	0	-1.0957
FAM110D	15	0.14315	0.37077	0.988905	370	4	-0.32433	0.42912	0.65366	0.965932	912	3	-0.32433
NonTargeting_Human_0808	1	0.14339	0.14453	0.988905	371	1	-1.0135	0.85661	0.8566	0.996179	1537	0	-1.0135
CDIPT	15	0.1436	0.37155	0.988905	372	6	-0.33112	0.099647	0.26609	0.965334	282	2	-0.33112
CBWD1	15	0.1437	0.37171	0.988905	373	5	0.0036318	0.050958	0.16686	0.963532	181	5	0.0036318
NonTargeting_Human_0354	1	0.14372	0.14481	0.988905	374	1	-0.91957	0.85628	0.85631	0.996179	1536	0	-0.91957
NDUFA13	14	0.14424	0.37096	0.988905	375	4	0.14972	0.85566	0.9001	0.999997	1535	1	0.14972
NonTargeting_Human_0117	1	0.14537	0.14626	0.988905	376	1	-1.0772	0.85463	0.85443	0.996179	1534	0	-1.0772
NonTargeting_Human_0988	1	0.1457	0.14655	0.988905	377	1	-1.0825	0.8543	0.85405	0.996179	1533	0	-1.0825
ABCB4	15	0.14572	0.37527	0.988905	378	6	-0.30798	0.96109	0.96099	0.999997	1673	1	-0.30798
NonTargeting_Human_0656	1	0.1462	0.14706	0.988905	379	1	-1.1147	0.8538	0.85356	0.996179	1532	0	-1.1147
NonTargeting_Human_0522	1	0.14636	0.1472	0.988905	380	1	-0.88355	0.85364	0.8534	0.996179	1531	0	-0.88355
SLC26A4	15	0.14744	0.37854	0.988905	381	4	-0.12302	0.80044	0.88516	0.999997	1469	2	-0.12302
CNOT2	14	0.14751	0.37574	0.988905	382	4	0.055052	0.0013397	0.0077458	0.615437	21	5	0.055052
NonTargeting_Human_0314	1	0.14785	0.14867	0.988905	383	1	-1.0346	0.85215	0.85196	0.996179	1530	0	-1.0346
FDX1L	15	0.1481	0.37964	0.988905	384	6	-0.3667	0.23937	0.46923	0.965334	567	4	-0.3667
CDT1	15	0.14984	0.38279	0.988905	385	5	-0.32972	0.0036388	0.02002	0.897309	32	6	-0.32972
UXT	15	0.15046	0.38389	0.988905	386	5	-0.24227	0.34231	0.58844	0.965334	769	2	-0.24227
NonTargeting_Human_0552	1	0.15123	0.15206	0.988905	387	1	-1.0829	0.84877	0.84876	0.996179	1528	0	-1.0829
BAGE2	15	0.15133	0.38539	0.988905	388	3	0.40267	0.3712	0.61043	0.965334	811	3	0.40267
NonTargeting_Human_0698	1	0.15164	0.15236	0.988905	389	1	-0.90443	0.84836	0.84836	0.996179	1527	0	-0.90443
NonTargeting_Human_0566	1	0.15263	0.15334	0.988905	390	1	-0.86442	0.84737	0.84746	0.996179	1526	0	-0.86442
NonTargeting_Human_0597	1	0.15304	0.15371	0.988905	391	1	-0.96394	0.84696	0.84707	0.996179	1524	0	-0.96394
NonTargeting_Human_0461	1	0.1542	0.15489	0.988905	392	1	-0.86117	0.8458	0.8458	0.996179	1522	0	-0.86117
EPN1	15	0.15505	0.39174	0.988905	393	5	-0.27138	0.99302	0.99291	0.999997	1725	0	-0.27138
COMMD10	15	0.15515	0.39195	0.988905	394	5	0.15044	0.17934	0.39658	0.965334	449	3	0.15044
INTS2	15	0.15562	0.39277	0.988905	395	3	0.070101	0.32864	0.57254	0.965334	738	4	0.070101
NonTargeting_Human_0045	1	0.15643	0.15692	0.988905	396	1	-0.83175	0.84357	0.84361	0.996179	1520	0	-0.83175
ZNF143	15	0.1566	0.3943	0.988905	397	5	-0.0077385	0.38056	0.61742	0.965334	828	3	-0.0077385
NonTargeting_Human_0733	1	0.15783	0.15841	0.988905	398	1	-1.0221	0.84217	0.8423	0.996179	1519	0	-1.0221
CHRNA3	15	0.15831	0.39726	0.988905	399	6	-0.013544	0.19727	0.41878	0.965334	488	4	-0.013544
KCNK4	15	0.15936	0.39924	0.988905	400	5	0.31083	0.14878	0.35416	0.965334	389	3	0.31083
RPL17	13	0.15998	0.38194	0.988905	401	3	0.00099042	0.39329	0.60515	0.965334	849	3	0.00099042
NonTargeting_Human_0849	1	0.16162	0.16219	0.988905	402	1	-0.73617	0.83838	0.83828	0.995862	1516	0	-0.73617
NonTargeting_Human_0113	1	0.16261	0.16319	0.988905	403	1	-0.86932	0.83739	0.83727	0.995612	1515	0	-0.86932
CCDC101	15	0.16268	0.40492	0.988905	404	5	0.0063446	0.31611	0.55845	0.965334	706	4	0.0063446
TMEM183A	15	0.16312	0.40566	0.988905	405	4	-0.1451	0.4033	0.63483	0.965334	872	3	-0.1451
NonTargeting_Human_0073	1	0.16319	0.16367	0.988905	406	1	-0.81499	0.83681	0.83665	0.995555	1514	0	-0.81499
HAPLN1	15	0.16356	0.40635	0.988905	407	4	0.14045	0.21191	0.43609	0.965334	518	4	0.14045
NonTargeting_Human_0360	1	0.1636	0.16407	0.988905	408	1	-0.93105	0.8364	0.83617	0.995555	1513	0	-0.93105
WNT3A	15	0.16473	0.4082	0.988905	409	4	-0.37662	0.71949	0.83914	0.995862	1356	2	-0.37662
NonTargeting_Human_0122	1	0.16484	0.16536	0.988905	410	1	-0.4895	0.83516	0.83484	0.994766	1511	0	-0.4895
NonTargeting_Human_0076	1	0.16533	0.1658	0.988905	411	1	-0.795	0.83467	0.83448	0.994766	1510	0	-0.795
PRPF6	15	0.16567	0.4099	0.988905	412	6	-0.076443	0.32752	0.57134	0.965334	733	2	-0.076443
NonTargeting_Human_0205	1	0.16583	0.16634	0.988905	413	1	-0.76292	0.83417	0.83386	0.994766	1509	0	-0.76292
EPAS1	15	0.16754	0.41309	0.988905	414	3	0.20777	0.08797	0.24411	0.965334	261	3	0.20777
NonTargeting_Human_0854	1	0.16756	0.16797	0.988905	415	1	-0.97026	0.83244	0.83218	0.994766	1508	0	-0.97026
SCARB1	15	0.1678	0.41354	0.988905	416	5	-0.32398	0.66993	0.81467	0.989313	1298	2	-0.32398
NonTargeting_Human_0492	1	0.1688	0.16926	0.988905	417	1	-0.75563	0.8312	0.83087	0.994766	1507	0	-0.75563
LSS	15	0.16887	0.4152	0.988905	418	2	0.19257	0.059315	0.18813	0.963532	203	4	0.19257
NonTargeting_Human_0962	1	0.16904	0.16949	0.988905	419	1	-0.90189	0.83096	0.83068	0.994766	1506	0	-0.90189
NonTargeting_Human_0227	1	0.17053	0.17086	0.988905	420	1	-0.81706	0.82947	0.82927	0.994766	1505	0	-0.81706
KDM3B	15	0.17064	0.41804	0.988905	421	5	0.2006	0.58989	0.77797	0.988967	1173	2	0.2006
NonTargeting_Human_0270	1	0.17094	0.17129	0.988905	422	1	-0.7763	0.82906	0.82879	0.994766	1504	0	-0.7763
PTAR1	15	0.17121	0.41891	0.988905	423	5	-0.12948	0.015354	0.066059	0.948682	82	4	-0.12948
POLR2C	15	0.17235	0.42094	0.988905	424	5	0.14779	0.1709	0.38614	0.965334	436	4	0.14779
ZFP3	15	0.17276	0.42164	0.988905	425	3	0.0075575	0.26677	0.50083	0.965334	612	4	0.0075575
SSR2	15	0.17307	0.42202	0.988905	426	4	-0.21296	0.29555	0.53501	0.965334	666	4	-0.21296
NonTargeting_Human_0411	1	0.1735	0.17388	0.988905	427	1	-0.79952	0.8265	0.82633	0.994766	1503	0	-0.79952
TP53TG3	15	0.17352	0.4227	0.988905	428	5	0.34498	0.92671	0.93733	0.999997	1618	1	0.34498
ATP6V1B1	15	0.17445	0.42429	0.988905	429	6	-0.44999	0.087176	0.24268	0.965334	258	2	-0.44999
UBE2I	15	0.17673	0.42839	0.988905	430	5	-0.2117	0.16243	0.37592	0.965334	421	3	-0.2117
ACTR3	14	0.17693	0.41702	0.988905	431	5	-0.31693	0.71696	0.83076	0.994766	1354	2	-0.31693
CABIN1	15	0.17717	0.4291	0.988905	432	5	-0.1297	0.98817	0.98809	0.999997	1718	0	-0.1297
IRS1	15	0.1784	0.43137	0.988905	433	4	0.44527	0.073418	0.21565	0.965271	226	5	0.44527
DNAL4	15	0.17863	0.4317	0.988905	434	6	-0.35105	0.31173	0.55359	0.965334	700	3	-0.35105
MARS2	15	0.17903	0.43237	0.988905	435	6	-0.27682	0.3569	0.60004	0.965334	788	3	-0.27682
KIF3C	15	0.18002	0.43411	0.988905	436	3	0.2441	0.019006	0.078254	0.948682	89	4	0.2441
KMT2D	15	0.18013	0.43425	0.988905	437	4	-0.096809	0.22422	0.45096	0.965334	542	4	-0.096809
NonTargeting_Human_0957	1	0.18043	0.18035	0.988905	438	1	-0.85942	0.81957	0.81928	0.989644	1495	0	-0.85942
NonTargeting_Human_0324	1	0.18059	0.1805	0.988905	439	1	-0.81276	0.81941	0.81909	0.989644	1493	0	-0.81276
SNX1	15	0.18272	0.43842	0.988905	440	5	-0.33904	0.38059	0.61744	0.965334	829	3	-0.33904
CCDC22	15	0.18339	0.43953	0.988905	441	5	-0.3737	0.56387	0.75744	0.986849	1121	2	-0.3737
NonTargeting_Human_0380	1	0.18373	0.18358	0.988905	442	1	-0.88052	0.81627	0.81613	0.989313	1491	0	-0.88052
NonTargeting_Human_0361	1	0.18406	0.18386	0.988905	443	1	-0.82348	0.81594	0.81582	0.989313	1490	0	-0.82348
CPM	15	0.18543	0.44242	0.988905	444	3	0.38989	0.050887	0.16668	0.963532	180	6	0.38989
NonTargeting_Human_0026	1	0.18554	0.18522	0.988905	445	1	-0.83127	0.81446	0.81439	0.989313	1489	0	-0.83127
RPL41	6	0.18564	0.3485	0.988905	446	2	-0.058811	0.082827	0.17948	0.963532	250	2	-0.058811
WDR55	15	0.18631	0.44346	0.988905	447	5	0.056799	0.18696	0.4061	0.965334	463	3	0.056799
TBXAS1	15	0.18633	0.44349	0.988905	448	4	0.021118	0.024433	0.094453	0.948682	109	5	0.021118
RAB10	15	0.18678	0.44393	0.988905	449	5	-0.33692	0.080335	0.22956	0.965334	243	2	-0.33692
NonTargeting_Human_0734	1	0.18694	0.18677	0.988905	450	1	-0.88686	0.81306	0.81305	0.989313	1488	0	-0.88686
NonTargeting_Human_0016	1	0.18934	0.18921	0.988905	451	1	-0.80072	0.81066	0.8107	0.989313	1487	0	-0.80072
UHRF2	15	0.18936	0.44701	0.988905	452	3	0.42437	0.096703	0.26057	0.965334	280	3	0.42437
NonTargeting_Human_0290	1	0.18983	0.18962	0.988905	453	1	-0.84116	0.81017	0.81021	0.989313	1486	0	-0.84116
RALB	15	0.19038	0.44822	0.988905	454	5	0.065668	0.073947	0.21674	0.965271	228	4	0.065668
NonTargeting_Human_0815	1	0.19131	0.19106	0.988905	455	1	-0.78692	0.80869	0.80887	0.989313	1485	0	-0.78692
NonTargeting_Human_0521	1	0.19164	0.19144	0.988905	456	1	-0.87636	0.80836	0.80854	0.989313	1484	0	-0.87636
BRD2	15	0.19258	0.45102	0.988905	457	4	0.17156	0.15795	0.36959	0.965334	413	4	0.17156
NonTargeting_Human_0746	1	0.19371	0.19352	0.988905	458	1	-0.83648	0.80629	0.80669	0.989313	1482	0	-0.83648
NonTargeting_Human_0786	1	0.19387	0.19366	0.988905	459	1	-0.88072	0.80613	0.80654	0.989313	1481	0	-0.88072
ELOF1	15	0.19405	0.45291	0.988905	460	5	0.076803	0.022646	0.089282	0.948682	104	3	0.076803
DARS	14	0.19415	0.44077	0.988905	461	2	0.5379	0.21947	0.43801	0.965334	534	4	0.5379
POLRMT	15	0.19436	0.45324	0.988905	462	4	0.096494	0.40582	0.63666	0.965334	876	3	0.096494
NonTargeting_Human_0195	1	0.19511	0.19479	0.988905	463	1	-0.87696	0.80489	0.80543	0.989313	1480	0	-0.87696
hsa-mir-6515	13	0.19628	0.43742	0.988905	464	5	-0.40701	0.82027	0.87332	0.999997	1496	1	-0.40701
NonTargeting_Human_0987	1	0.19651	0.19621	0.988905	465	1	-0.65219	0.80349	0.80396	0.988967	1476	0	-0.65219
NonTargeting_Human_0515	1	0.19676	0.19648	0.988905	466	1	-0.76211	0.80324	0.80372	0.988967	1475	0	-0.76211
NonTargeting_Human_0676	1	0.19742	0.19708	0.988905	467	1	-0.87174	0.80258	0.80318	0.988967	1473	0	-0.87174
NonTargeting_Human_0448	1	0.19758	0.19722	0.988905	468	1	-0.75741	0.80242	0.80301	0.988967	1472	0	-0.75741
NonTargeting_Human_0349	1	0.19816	0.19786	0.988905	469	1	-0.5796	0.80184	0.8024	0.988967	1471	0	-0.5796
NonTargeting_Human_0362	1	0.19866	0.19833	0.988905	470	1	-0.86757	0.80134	0.80194	0.988967	1470	0	-0.86757
GTDC2	15	0.20248	0.46317	0.988905	471	4	-0.095223	0.46065	0.67697	0.971649	963	3	-0.095223
SULT6B1	14	0.20261	0.45206	0.988905	472	5	-0.17505	0.22227	0.44159	0.965334	537	3	-0.17505
ZNF124	15	0.20347	0.4644	0.988905	473	5	0.15543	0.59898	0.78376	0.988967	1194	1	0.15543
NonTargeting_Human_0579	1	0.20352	0.20332	0.988905	474	1	-0.7297	0.79648	0.79709	0.988967	1468	0	-0.7297
NonTargeting_Human_0588	1	0.20426	0.20416	0.988905	475	1	-0.7985	0.79574	0.79639	0.988967	1467	0	-0.7985
SNX19	15	0.20448	0.46563	0.988905	476	3	-0.098327	0.42071	0.64759	0.965932	896	3	-0.098327
NonTargeting_Human_0506	1	0.20517	0.20503	0.988905	477	1	-0.83977	0.79483	0.79537	0.988967	1466	0	-0.83977
ERCC3	15	0.20535	0.46666	0.988905	478	5	0.19539	0.10698	0.2798	0.965334	301	5	0.19539
RUVBL2	15	0.20544	0.46676	0.988905	479	5	0.10953	0.37858	0.61609	0.965334	823	3	0.10953
hsa-mir-638	15	0.20548	0.46682	0.988905	480	2	0.32997	0.27724	0.5131	0.965334	636	3	0.32997
FAM156A	15	0.20639	0.46793	0.988905	481	5	-0.3065	0.32881	0.57274	0.965334	739	3	-0.3065
HSD17B10	15	0.20733	0.46907	0.988905	482	5	-0.071801	0.58802	0.77645	0.988967	1169	2	-0.071801
TM9SF2	14	0.20742	0.45859	0.988905	483	5	-0.18284	0.22545	0.44559	0.965334	545	4	-0.18284
NonTargeting_Human_0325	1	0.20748	0.20736	0.988905	484	1	-0.77311	0.79252	0.79295	0.988967	1464	0	-0.77311
COX5B	15	0.20804	0.46994	0.988905	485	5	0.52658	0.023712	0.092527	0.948682	106	5	0.52658
NonTargeting_Human_0681	1	0.20847	0.20814	0.988905	486	1	-0.76073	0.79153	0.792	0.988967	1463	0	-0.76073
NonTargeting_Human_0561	1	0.20897	0.2086	0.988905	487	1	-0.7759	0.79103	0.79158	0.988967	1462	0	-0.7759
NonTargeting_Human_0514	1	0.20905	0.2087	0.988905	488	1	-0.78349	0.79095	0.79149	0.988967	1461	0	-0.78349
NonTargeting_Human_0675	1	0.20921	0.20887	0.988905	489	1	-0.72778	0.79079	0.79129	0.988967	1460	0	-0.72778
NonTargeting_Human_0337	1	0.20987	0.20963	0.988905	490	1	-0.51963	0.79013	0.79062	0.988967	1457	0	-0.51963
NonTargeting_Human_0882	1	0.20996	0.2097	0.988905	491	1	-0.81945	0.79004	0.79055	0.988967	1456	0	-0.81945
STK11	15	0.21006	0.47217	0.988905	492	3	0.0040013	0.70455	0.83176	0.994766	1340	2	0.0040013
NonTargeting_Human_0628	1	0.21037	0.21	0.988905	493	1	-0.61308	0.78963	0.79013	0.988967	1455	0	-0.61308
NonTargeting_Human_0350	1	0.21268	0.21229	0.988905	494	1	-0.76252	0.78732	0.78803	0.988967	1454	0	-0.76252
UBA3	15	0.21343	0.47639	0.988905	495	3	0.94532	0.0022131	0.012674	0.692296	27	8	0.94532
NonTargeting_Human_0668	1	0.21383	0.21353	0.988905	496	1	-0.70339	0.78617	0.7869	0.988967	1453	0	-0.70339
NonTargeting_Human_0721	1	0.21573	0.21549	0.988905	497	1	-0.76815	0.78427	0.78501	0.988967	1450	0	-0.76815
NonTargeting_Human_0139	1	0.21614	0.21585	0.988905	498	1	-0.75529	0.78386	0.78458	0.988967	1448	0	-0.75529
NonTargeting_Human_0446	1	0.21631	0.21603	0.988905	499	1	-0.59761	0.78369	0.78442	0.988967	1447	0	-0.59761
NonTargeting_Human_0768	1	0.21639	0.21613	0.988905	500	1	-0.7936	0.78361	0.78432	0.988967	1446	0	-0.7936
CEP97	15	0.21639	0.47997	0.988905	501	2	-0.13751	0.50719	0.71273	0.982677	1039	2	-0.13751
NonTargeting_Human_0405	1	0.21655	0.21629	0.988905	502	1	-0.66755	0.78345	0.78416	0.988967	1445	0	-0.66755
DCAKD	15	0.21771	0.48161	0.988905	503	4	-0.080892	0.14671	0.35056	0.965334	383	3	-0.080892
TAOK1	15	0.21804	0.48202	0.988905	504	5	0.22488	0.024362	0.0943	0.948682	108	6	0.22488
NOMO1	15	0.21841	0.48242	0.988905	505	4	0.089897	0.059522	0.18852	0.963532	204	3	0.089897
PON1	15	0.21896	0.483	0.988905	506	4	-0.32218	0.49966	0.70671	0.981106	1018	2	-0.32218
NonTargeting_Human_0926	1	0.21952	0.21933	0.988905	507	1	-0.37196	0.78048	0.78112	0.988967	1444	0	-0.37196
USO1	14	0.21972	0.47489	0.988905	508	4	-0.27447	0.55129	0.74428	0.982877	1109	1	-0.27447
EIF2S2	14	0.22047	0.47594	0.988905	509	5	0.19087	0.23053	0.45193	0.965334	556	3	0.19087
NonTargeting_Human_0431	1	0.22051	0.22016	0.988905	510	1	-0.76425	0.77949	0.78015	0.988967	1442	0	-0.76425
LRRC8A	15	0.22116	0.48581	0.988905	511	4	-0.086165	0.44615	0.66609	0.966998	938	3	-0.086165
SRGAP2	15	0.22172	0.48649	0.988905	512	3	0.50411	0.0048019	0.025208	0.902682	38	5	0.50411
NonTargeting_Human_0938	1	0.22299	0.22259	0.988905	513	1	-0.68972	0.77701	0.7777	0.988967	1439	0	-0.68972
GTF2H3	15	0.22341	0.48852	0.988905	514	5	-0.16035	0.21738	0.4427	0.965334	533	2	-0.16035
NonTargeting_Human_0940	1	0.22455	0.2242	0.988905	515	1	-0.53945	0.77545	0.77591	0.988967	1438	0	-0.53945
NonTargeting_Human_0638	1	0.22472	0.22441	0.988905	516	1	-0.70245	0.77528	0.77575	0.988967	1437	0	-0.70245
NonTargeting_Human_0292	1	0.22488	0.22457	0.988905	517	1	-0.76026	0.77512	0.7756	0.988967	1436	0	-0.76026
FNDC3B	15	0.22536	0.49087	0.988905	518	5	-0.41569	0.94018	0.94492	0.999997	1635	1	-0.41569
NonTargeting_Human_0992	1	0.22587	0.22565	0.988905	519	1	-0.75591	0.77413	0.77462	0.988967	1434	0	-0.75591
KBTBD12	15	0.22783	0.49382	0.988905	520	4	-0.074038	0.37895	0.61628	0.965334	824	3	-0.074038
CCT6B	15	0.22805	0.49402	0.988905	521	5	0.27777	0.18477	0.4035	0.965334	460	4	0.27777
INPP5J	15	0.22911	0.4953	0.988905	522	3	-0.1993	0.72092	0.83983	0.995862	1357	2	-0.1993
UBE2L3	15	0.23008	0.49633	0.988905	523	3	-0.13861	0.28713	0.5249	0.965334	656	1	-0.13861
NonTargeting_Human_0785	1	0.23058	0.23054	0.988905	524	1	-0.65606	0.76942	0.76996	0.988967	1433	0	-0.65606
ATP5I	14	0.23095	0.48958	0.988905	525	4	0.17659	0.038553	0.13241	0.948682	156	4	0.17659
NonTargeting_Human_0997	1	0.23181	0.23172	0.988905	526	1	-0.55066	0.76819	0.76881	0.988967	1432	0	-0.55066
NonTargeting_Human_0396	1	0.23264	0.23264	0.988905	527	1	-0.65145	0.76736	0.76792	0.988967	1431	0	-0.65145
CERS6	15	0.234	0.50105	0.988905	528	4	0.26658	0.56676	0.7598	0.986849	1128	3	0.26658
RHOT2	15	0.23423	0.50135	0.988905	529	4	-0.067439	0.010762	0.048347	0.934298	69	4	-0.067439
LONP1	15	0.23497	0.50231	0.988905	530	5	0.0018466	0.035883	0.12573	0.948682	150	5	0.0018466
NonTargeting_Human_0822	1	0.23585	0.23567	0.988905	531	1	-0.72255	0.76415	0.76441	0.986849	1430	0	-0.72255
NELFB	15	0.23587	0.50333	0.988905	532	2	0.07816	0.06691	0.20322	0.963532	218	4	0.07816
NonTargeting_Human_0751	1	0.23602	0.23584	0.988905	533	1	-0.66342	0.76398	0.76429	0.986849	1429	0	-0.66342
NonTargeting_Human_0064	1	0.2361	0.23596	0.988905	534	1	-0.72161	0.7639	0.7642	0.986849	1428	0	-0.72161
PTPMT1	15	0.23652	0.50415	0.988905	535	2	0.020416	0.86256	0.91267	0.999997	1545	1	0.020416
NonTargeting_Human_0925	1	0.2366	0.23651	0.988905	536	1	-0.71891	0.7634	0.76372	0.986849	1427	0	-0.71891
NFRKB	15	0.23683	0.50455	0.988905	537	2	0.28743	0.42429	0.65035	0.965932	906	3	0.28743
NonTargeting_Human_0304	1	0.23759	0.23742	0.988905	538	1	-0.66044	0.76241	0.76274	0.986849	1426	0	-0.66044
NonTargeting_Human_0011	1	0.23792	0.23781	0.988905	539	1	-0.69942	0.76208	0.76244	0.986849	1425	0	-0.69942
NonTargeting_Human_0947	1	0.23915	0.23898	0.988905	540	1	-0.68895	0.76085	0.76126	0.986849	1423	0	-0.68895
NonTargeting_Human_0970	1	0.23948	0.2393	0.988905	541	1	-0.4131	0.76052	0.76091	0.986849	1422	0	-0.4131
EPB41	15	0.24067	0.50897	0.988905	542	4	0.029612	0.094915	0.25728	0.965334	277	5	0.029612
NonTargeting_Human_0068	1	0.24113	0.24104	0.988905	543	1	-0.45037	0.75887	0.75936	0.986849	1421	0	-0.45037
NonTargeting_Human_0888	1	0.24155	0.24145	0.988905	544	1	-0.70046	0.75845	0.75884	0.986849	1420	0	-0.70046
NonTargeting_Human_0652	1	0.24171	0.24159	0.988905	545	1	-0.68017	0.75829	0.75868	0.986849	1419	0	-0.68017
NonTargeting_Human_0611	1	0.24237	0.2422	0.988905	546	1	-0.65061	0.75763	0.75805	0.986849	1417	0	-0.65061
NonTargeting_Human_0729	1	0.24361	0.24357	0.988905	547	1	-0.58228	0.75639	0.75687	0.986849	1415	0	-0.58228
NonTargeting_Human_0116	1	0.24427	0.24429	0.988905	548	1	-0.53982	0.75573	0.75615	0.986849	1414	0	-0.53982
NonTargeting_Human_0119	1	0.24468	0.24471	0.988905	549	1	-0.51994	0.75532	0.7557	0.986849	1412	0	-0.51994
CTCF	15	0.24541	0.5144	0.988905	550	4	-0.10902	0.30006	0.54028	0.965334	676	2	-0.10902
SLC7A6OS	15	0.24549	0.51449	0.988905	551	5	-0.33368	0.43985	0.66156	0.966998	925	2	-0.33368
NonTargeting_Human_0241	1	0.24616	0.246	0.988905	552	1	-0.6846	0.75384	0.75422	0.986849	1411	0	-0.6846
GMPPB	15	0.24639	0.51568	0.988905	553	5	-0.24774	0.66456	0.81239	0.989313	1288	2	-0.24774
NonTargeting_Human_0902	1	0.24715	0.24715	0.988905	554	1	-0.65379	0.75285	0.75323	0.986849	1410	0	-0.65379
UBA2	15	0.24734	0.51677	0.988905	555	2	0.31292	0.020796	0.083561	0.948682	96	4	0.31292
LAMTOR4	15	0.24735	0.51678	0.988905	556	4	-0.20902	0.089879	0.24788	0.965334	265	4	-0.20902
WDR37	15	0.24764	0.51701	0.988905	557	5	-0.17552	0.10606	0.27819	0.965334	297	3	-0.17552
RALGAPA1	15	0.24916	0.51867	0.988905	558	4	0.15064	0.39466	0.62855	0.965334	851	3	0.15064
NUDT5	15	0.24954	0.51907	0.988905	559	5	-0.18919	0.2261	0.45322	0.965334	547	3	-0.18919
NonTargeting_Human_0944	1	0.24971	0.2495	0.988905	560	1	-0.578	0.75029	0.75056	0.986448	1408	0	-0.578
INTS1	15	0.25113	0.52083	0.988905	561	4	-0.10657	0.9532	0.9543	0.999997	1659	1	-0.10657
OSTC	15	0.25182	0.52169	0.988905	562	5	-0.30943	0.63241	0.79794	0.988967	1246	1	-0.30943
NonTargeting_Human_0935	1	0.25285	0.25264	0.988905	563	1	-0.63305	0.74715	0.74767	0.98488	1405	0	-0.63305
UPP2	15	0.25386	0.52401	0.988905	564	3	0.54002	0.10576	0.27763	0.965334	295	5	0.54002
TSPYL4	15	0.25455	0.52496	0.988905	565	4	-0.014512	0.94836	0.95033	0.999997	1650	1	-0.014512
IGF1R	15	0.25463	0.52503	0.988905	566	5	-0.37522	0.3706	0.61006	0.965334	810	2	-0.37522
NonTargeting_Human_0939	1	0.2554	0.25521	0.988905	567	1	-0.58106	0.7446	0.74503	0.982877	1403	0	-0.58106
MRPS31	15	0.25589	0.52658	0.988905	568	4	-0.12235	0.40006	0.63234	0.965334	864	3	-0.12235
NonTargeting_Human_0862	1	0.2559	0.25566	0.988905	569	1	-0.64738	0.7441	0.7445	0.982877	1402	0	-0.64738
NonTargeting_Human_0725	1	0.25598	0.25578	0.988905	570	1	-0.64378	0.74402	0.74442	0.982877	1401	0	-0.64378
STK40	15	0.25617	0.52691	0.988905	571	5	-0.26281	0.98263	0.9827	0.999997	1710	0	-0.26281
NonTargeting_Human_0789	1	0.25821	0.25818	0.988905	572	1	-0.61846	0.74179	0.74224	0.982877	1397	0	-0.61846
NonTargeting_Human_0702	1	0.25837	0.25837	0.988905	573	1	-0.63328	0.74163	0.74208	0.982877	1396	0	-0.63328
NonTargeting_Human_0948	1	0.25911	0.25906	0.988905	574	1	-0.52995	0.74089	0.74134	0.982877	1395	0	-0.52995
NonTargeting_Human_0833	1	0.25944	0.25933	0.988905	575	1	-0.50482	0.74056	0.74095	0.982877	1393	0	-0.50482
MRPL42	15	0.25958	0.53065	0.988905	576	4	-0.014299	0.15068	0.35759	0.965334	396	4	-0.014299
NonTargeting_Human_0770	1	0.26002	0.25982	0.988905	577	1	-0.63659	0.73998	0.7404	0.982877	1392	0	-0.63659
NonTargeting_Human_0442	1	0.2601	0.25988	0.988905	578	1	-0.60031	0.7399	0.74031	0.982877	1391	0	-0.60031
NonTargeting_Human_0881	1	0.26019	0.25998	0.988905	579	1	-0.61422	0.73981	0.74022	0.982877	1390	0	-0.61422
JAK1	15	0.26044	0.53174	0.988905	580	3	0.094789	0.98268	0.98278	0.999997	1711	0	0.094789
NXF5	15	0.26122	0.53268	0.988905	581	4	0.059116	0.5113	0.71608	0.982717	1049	3	0.059116
NonTargeting_Human_0993	1	0.262	0.26175	0.988905	582	1	-0.63167	0.738	0.73844	0.982877	1387	0	-0.63167
TAF8	15	0.26312	0.53508	0.988905	583	5	0.051426	0.51232	0.71687	0.982717	1051	3	0.051426
PROX1	15	0.26338	0.53543	0.988905	584	5	-0.36589	0.01749	0.073813	0.948682	84	3	-0.36589
NonTargeting_Human_0759	1	0.2634	0.26331	0.988905	585	1	-0.50962	0.7366	0.73693	0.982717	1386	0	-0.50962
NonTargeting_Human_0475	1	0.26423	0.26418	0.988905	586	1	-0.5924	0.73577	0.73616	0.982717	1385	0	-0.5924
NonTargeting_Human_0550	1	0.26481	0.26478	0.988905	587	1	-0.62323	0.73519	0.7355	0.982717	1384	0	-0.62323
NonTargeting_Human_0533	1	0.26505	0.26504	0.988905	588	1	-0.60752	0.73495	0.7353	0.982717	1383	0	-0.60752
NonTargeting_Human_0619	1	0.2653	0.26532	0.988905	589	0	-0.618	0.7347	0.73496	0.982717	1382	0	-0.618
NonTargeting_Human_0818	1	0.26538	0.2654	0.988905	590	0	-0.49224	0.73462	0.73489	0.982717	1381	0	-0.49224
NonTargeting_Human_0207	1	0.26604	0.26605	0.988905	591	0	-0.61008	0.73396	0.73419	0.982717	1380	0	-0.61008
NonTargeting_Human_0395	1	0.26613	0.26612	0.988905	592	0	-0.57972	0.73387	0.73413	0.982717	1379	0	-0.57972
GPN2	15	0.26649	0.53902	0.988905	593	5	0.43962	0.20797	0.43145	0.965334	512	4	0.43962
NonTargeting_Human_0688	1	0.26753	0.26749	0.988905	594	0	-0.6154	0.73247	0.73277	0.982717	1377	0	-0.6154
NonTargeting_Human_0436	1	0.26786	0.26779	0.988905	595	0	-0.61224	0.73214	0.73248	0.982717	1376	0	-0.61224
MED1	15	0.26797	0.54088	0.988905	596	5	-0.00014712	0.79043	0.87898	0.999997	1459	1	-0.00014712
NonTargeting_Human_0444	1	0.26835	0.26824	0.988905	597	0	-0.50554	0.73165	0.732	0.982717	1375	0	-0.50554
NonTargeting_Human_0736	1	0.26843	0.26831	0.988905	598	0	-0.48879	0.73157	0.73191	0.982717	1374	0	-0.48879
NonTargeting_Human_0845	1	0.26852	0.26838	0.988905	599	0	-0.61008	0.73148	0.73186	0.982717	1373	0	-0.61008
NonTargeting_Human_0713	1	0.26901	0.26896	0.988905	600	0	-0.5749	0.73099	0.73137	0.982717	1372	0	-0.5749
SYTL3	15	0.26939	0.54253	0.988905	601	4	-0.08784	0.78575	0.87616	0.999997	1452	2	-0.08784
NonTargeting_Human_0313	1	0.26951	0.26941	0.988905	602	0	-0.48192	0.73049	0.73077	0.982717	1371	0	-0.48192
NonTargeting_Human_0692	1	0.26967	0.26954	0.988905	603	0	-0.57334	0.73033	0.73061	0.982717	1370	0	-0.57334
ASH2L	15	0.27056	0.54387	0.988905	604	4	0.41185	0.20347	0.42607	0.965334	498	3	0.41185
DNAJC17	14	0.27091	0.54131	0.988905	605	4	0.53392	0.12236	0.307	0.965334	333	2	0.53392
PPIL2	14	0.27119	0.54161	0.988905	606	4	0.29354	0.093904	0.25102	0.965334	271	4	0.29354
NonTargeting_Human_0865	1	0.27173	0.27162	0.988905	607	0	-0.51314	0.72827	0.72863	0.982717	1369	0	-0.51314
GATS	15	0.27231	0.546	0.988905	608	4	-0.18981	0.96347	0.96328	0.999997	1678	1	-0.18981
NonTargeting_Human_0507	1	0.27421	0.27399	0.988905	609	0	-0.59117	0.72579	0.72625	0.982717	1367	0	-0.59117
ORMDL3	15	0.27441	0.54836	0.988905	610	5	0.011674	0.89829	0.92473	0.999997	1585	1	0.011674
ZNHIT1	15	0.27442	0.54838	0.988905	611	3	-0.19057	0.2721	0.50728	0.965334	626	2	-0.19057
MYOZ3	15	0.27457	0.54856	0.988905	612	2	0.11745	0.11206	0.28923	0.965334	314	4	0.11745
NonTargeting_Human_0048	1	0.27503	0.27486	0.988905	613	0	-0.5907	0.72497	0.7255	0.982717	1366	0	-0.5907
NonTargeting_Human_0829	1	0.27545	0.27528	0.988905	614	0	-0.58334	0.72455	0.72497	0.982717	1365	0	-0.58334
NonTargeting_Human_0222	1	0.27619	0.27598	0.988905	615	0	-0.56789	0.72381	0.72425	0.982717	1364	0	-0.56789
URI1	15	0.27642	0.55055	0.988905	616	5	0.038597	0.35891	0.60161	0.965334	796	3	0.038597
NonTargeting_Human_0662	1	0.27644	0.27626	0.988905	617	0	-0.54969	0.72356	0.72407	0.982717	1363	0	-0.54969
ZNF548	15	0.27677	0.55101	0.988905	618	4	-0.15963	0.69438	0.82632	0.994766	1329	2	-0.15963
ALDH3A2	15	0.27706	0.55139	0.988905	619	4	0.58354	0.079026	0.22677	0.965334	237	5	0.58354
PKD1	15	0.27747	0.55186	0.988905	620	5	-0.13317	0.42386	0.64995	0.965932	905	2	-0.13317
NonTargeting_Human_0526	1	0.27751	0.27726	0.988905	621	0	-0.5733	0.72249	0.72291	0.982717	1362	0	-0.5733
hsa-mir-532	15	0.27806	0.55261	0.988905	622	3	0.28467	0.77983	0.87292	0.999997	1443	1	0.28467
NonTargeting_Human_0469	1	0.27825	0.278	0.988905	623	0	-0.39255	0.72175	0.72206	0.982717	1359	0	-0.39255
NCBP1	15	0.27835	0.55291	0.988905	624	5	0.67408	0.34194	0.58805	0.965334	767	3	0.67408
NonTargeting_Human_0797	1	0.2785	0.27828	0.988905	625	0	-0.57415	0.7215	0.72177	0.982717	1358	0	-0.57415
NonTargeting_Human_0964	1	0.28262	0.28217	0.988905	626	0	-0.2916	0.71738	0.71773	0.982717	1355	0	-0.2916
NonTargeting_Human_0283	1	0.2832	0.28267	0.988905	627	0	-0.40597	0.7168	0.71713	0.982717	1353	0	-0.40597
KCNU1	15	0.28351	0.559	0.988905	628	2	0.12262	0.23491	0.46407	0.965334	562	3	0.12262
NARF	15	0.28442	0.56006	0.988905	629	5	-0.25159	0.97855	0.97869	0.999997	1706	0	-0.25159
NonTargeting_Human_0032	1	0.28468	0.28418	0.988905	630	0	-0.55516	0.71532	0.71562	0.982717	1352	0	-0.55516
NonTargeting_Human_0185	1	0.28592	0.28546	0.988905	631	0	-0.52813	0.71408	0.71434	0.982717	1351	0	-0.52813
NonTargeting_Human_0157	1	0.286	0.28556	0.988905	632	0	-0.5518	0.714	0.71424	0.982717	1350	0	-0.5518
AHSP	15	0.28637	0.56217	0.988905	633	3	-0.033251	0.34555	0.59172	0.965334	778	3	-0.033251
ATP5O	15	0.28713	0.56301	0.988905	634	3	0.022585	0.92408	0.93604	0.999997	1612	1	0.022585
SNAPC2	15	0.28732	0.56323	0.988905	635	2	0.37988	0.17397	0.38977	0.965334	440	4	0.37988
NonTargeting_Human_0749	1	0.28741	0.28699	0.988905	636	0	-0.54619	0.71259	0.71283	0.982677	1349	0	-0.54619
NonTargeting_Human_0757	1	0.2879	0.28753	0.988905	637	0	-0.54027	0.7121	0.71226	0.982677	1348	0	-0.54027
NonTargeting_Human_0092	1	0.28881	0.28848	0.988905	638	0	-0.54493	0.71119	0.71133	0.982677	1347	0	-0.54493
STT3A	15	0.28983	0.5664	0.988905	639	4	-0.22699	0.82044	0.89854	0.999997	1497	1	-0.22699
S100A10	15	0.29179	0.56869	0.988905	640	5	-0.31231	0.9941	0.99392	0.999997	1727	0	-0.31231
NonTargeting_Human_0086	1	0.29293	0.2925	0.988905	641	0	-0.48067	0.70707	0.7072	0.981106	1344	0	-0.48067
NonTargeting_Human_0037	1	0.2931	0.29268	0.988905	642	0	-0.44672	0.7069	0.70706	0.981106	1343	0	-0.44672
PFDN6	15	0.29342	0.57067	0.988905	643	4	0.11297	0.66016	0.81021	0.989313	1282	2	0.11297
NonTargeting_Human_0144	1	0.29392	0.29361	0.988905	644	0	-0.52244	0.70608	0.70634	0.981106	1342	0	-0.52244
CIAPIN1	15	0.29393	0.57123	0.988905	645	3	0.027963	0.55408	0.74952	0.985819	1112	3	0.027963
NonTargeting_Human_0832	1	0.29425	0.29399	0.988905	646	0	-0.50054	0.70575	0.70607	0.981106	1341	0	-0.50054
TAF1B	15	0.29527	0.57286	0.988905	647	5	0.10119	0.52955	0.73017	0.982717	1079	3	0.10119
GCFC2	15	0.29922	0.57739	0.988905	648	4	0.52286	0.0040591	0.02202	0.902682	33	5	0.52286
NonTargeting_Human_0697	1	0.29953	0.29935	0.988905	649	0	-0.47956	0.70047	0.70095	0.980733	1337	0	-0.47956
NonTargeting_Human_0175	1	0.29969	0.29955	0.988905	650	0	-0.4801	0.70031	0.70075	0.980733	1336	0	-0.4801
ZG16B	15	0.301	0.57941	0.988905	651	5	-0.35051	0.98296	0.98304	0.999997	1712	0	-0.35051
CUL7	15	0.30187	0.58041	0.988905	652	5	-0.31615	0.95094	0.95241	0.999997	1655	1	-0.31615
NonTargeting_Human_0919	1	0.302	0.30187	0.988905	653	0	-0.51619	0.698	0.69843	0.979035	1333	0	-0.51619
NonTargeting_Human_0288	1	0.30209	0.30196	0.988905	654	0	-0.45238	0.69791	0.69836	0.979035	1332	0	-0.45238
NonTargeting_Human_0667	1	0.30291	0.30268	0.988905	655	0	-0.45285	0.69709	0.69748	0.979035	1331	0	-0.45285
NonTargeting_Human_0274	1	0.30365	0.30331	0.988905	656	0	-0.51063	0.69635	0.69677	0.979035	1330	0	-0.51063
NAA60	15	0.30386	0.5826	0.988905	657	4	-0.137	0.96629	0.96614	0.999997	1681	0	-0.137
GTF2A2	15	0.30421	0.58311	0.988905	658	3	0.10463	0.063485	0.19648	0.963532	214	3	0.10463
NonTargeting_Human_0494	1	0.30563	0.3052	0.988905	659	0	-0.49055	0.69437	0.69474	0.978416	1328	0	-0.49055
PRR20A	15	0.30564	0.58459	0.988905	660	4	0.033186	0.68451	0.82141	0.990909	1317	2	0.033186
ANKHD1-EIF4EBP3	15	0.30672	0.58575	0.988905	661	2	0.40422	0.46631	0.68149	0.971876	975	3	0.40422
EIF2B4	15	0.30714	0.58619	0.988905	662	4	-0.14093	0.31854	0.56139	0.965334	712	3	-0.14093
NonTargeting_Human_0424	1	0.30728	0.30679	0.988905	663	0	-0.49941	0.69272	0.69335	0.978188	1327	0	-0.49941
NonTargeting_Human_0971	1	0.30918	0.30852	0.988905	664	0	-0.48796	0.69082	0.69148	0.976339	1325	0	-0.48796
NonTargeting_Human_0879	1	0.31025	0.30971	0.988905	665	0	-0.45866	0.68975	0.69039	0.976056	1324	0	-0.45866
NonTargeting_Human_0248	1	0.31033	0.30978	0.988905	666	0	-0.46627	0.68967	0.69031	0.976056	1323	0	-0.46627
NonTargeting_Human_0773	1	0.31116	0.31059	0.988905	667	0	-0.46071	0.68884	0.68941	0.976056	1322	0	-0.46071
COPS6	13	0.31177	0.57239	0.988905	668	3	1.2839	0.00032464	0.00194	0.413779	7	8	1.2839
HAVCR1	15	0.31198	0.59154	0.988905	669	4	-0.13785	0.95894	0.95879	0.999997	1669	1	-0.13785
SDHAF1	15	0.31233	0.59186	0.988905	670	3	-0.25809	0.27935	0.51563	0.965334	641	3	-0.25809
NonTargeting_Human_0672	1	0.3124	0.3119	0.988905	671	0	-0.4593	0.6876	0.68812	0.976056	1321	0	-0.4593
ALG13	15	0.3128	0.59237	0.988905	672	4	0.36178	0.38725	0.62268	0.965334	841	3	0.36178
NonTargeting_Human_0403	1	0.31289	0.31238	0.988905	673	0	-0.4761	0.68711	0.68769	0.976056	1320	0	-0.4761
NonTargeting_Human_0025	1	0.31405	0.31346	0.988905	674	0	-0.48354	0.68595	0.68667	0.975855	1319	0	-0.48354
NonTargeting_Human_0624	1	0.31504	0.31436	0.988905	675	0	-0.40409	0.68496	0.68564	0.975183	1318	0	-0.40409
PGS1	15	0.31581	0.59566	0.988905	676	4	-0.092646	0.3564	0.59977	0.965334	786	3	-0.092646
C11orf57	15	0.31774	0.59782	0.988905	677	5	-0.20458	0.4015	0.63329	0.965334	869	3	-0.20458
NonTargeting_Human_0961	1	0.31784	0.31712	0.988905	678	0	-0.33167	0.68216	0.6828	0.972341	1316	0	-0.33167
NonTargeting_Human_0974	1	0.319	0.31844	0.988905	679	0	-0.28246	0.681	0.68165	0.971876	1314	0	-0.28246
COA4	15	0.31916	0.59941	0.988905	680	5	0.093447	0.83847	0.90635	0.999997	1517	1	0.093447
NonTargeting_Human_0430	1	0.31957	0.31909	0.988905	681	0	-0.089949	0.68043	0.68111	0.971876	1312	0	-0.089949
IRS4	15	0.31987	0.60024	0.988905	682	3	0.30834	0.21639	0.44153	0.965334	529	2	0.30834
PGM1	15	0.31993	0.60031	0.988905	683	5	-0.33944	0.96872	0.96863	0.999997	1688	0	-0.33944
NonTargeting_Human_0937	1	0.32007	0.31955	0.988905	684	0	-0.36867	0.67993	0.68052	0.971876	1311	0	-0.36867
NonTargeting_Human_0453	1	0.3218	0.32128	0.988905	685	0	-0.45771	0.6782	0.67879	0.971876	1310	0	-0.45771
CLK2	15	0.32237	0.60297	0.988905	686	3	0.25087	0.14557	0.34838	0.965334	382	4	0.25087
NonTargeting_Human_0867	1	0.32295	0.32245	0.988905	687	0	-0.44717	0.67705	0.6776	0.971649	1307	0	-0.44717
NonTargeting_Human_0101	1	0.32345	0.32301	0.988905	688	0	-0.45691	0.67655	0.67711	0.971649	1306	0	-0.45691
NonTargeting_Human_0214	1	0.3237	0.32326	0.988905	689	0	-0.44449	0.6763	0.67685	0.971649	1305	0	-0.44449
KLC2	15	0.32387	0.60461	0.988905	690	4	-0.18702	0.19746	0.41901	0.965334	489	4	-0.18702
NonTargeting_Human_0525	1	0.32518	0.32467	0.988905	691	0	-0.38664	0.67482	0.67543	0.971649	1304	0	-0.38664
CLDND2	15	0.32537	0.60621	0.988905	692	4	0.3001	0.22374	0.45036	0.965334	539	3	0.3001
NonTargeting_Human_0217	1	0.32568	0.32517	0.988905	693	0	-0.45371	0.67432	0.67493	0.971649	1303	0	-0.45371
ADAMTSL1	15	0.32652	0.60754	0.988905	694	5	-0.20281	0.39574	0.62938	0.965334	855	3	-0.20281
NonTargeting_Human_0622	1	0.32766	0.32719	0.988905	695	0	-0.44633	0.67234	0.67319	0.970897	1301	0	-0.44633
NonTargeting_Human_0194	1	0.32889	0.32837	0.988905	696	0	-0.44312	0.67111	0.67202	0.970023	1300	0	-0.44312
MED26	15	0.32923	0.61036	0.988905	697	2	0.52076	0.66637	0.81323	0.989313	1292	2	0.52076
SPI1	15	0.3312	0.61248	0.988905	698	5	0.4893	0.12455	0.31161	0.965334	337	5	0.4893
NonTargeting_Human_0666	1	0.33129	0.33072	0.988905	699	0	-0.43702	0.66871	0.66981	0.968426	1295	0	-0.43702
NonTargeting_Human_0532	1	0.33293	0.33237	0.988905	700	0	-0.40353	0.66707	0.66817	0.966998	1294	0	-0.40353
ZDHHC5	15	0.33304	0.61463	0.988905	701	4	0.051294	0.15567	0.36583	0.965334	405	2	0.051294
NonTargeting_Human_0160	1	0.3331	0.33259	0.988905	702	0	-0.43147	0.6669	0.66795	0.966998	1293	0	-0.43147
NIPSNAP1	15	0.33347	0.6151	0.988905	703	3	0.14302	0.40977	0.63951	0.965334	883	3	0.14302
BATF	15	0.33401	0.6157	0.988905	704	3	0.044523	0.94678	0.94919	0.999997	1646	1	0.044523
NonTargeting_Human_0447	1	0.33409	0.33363	0.988905	705	0	-0.42934	0.66591	0.66685	0.966998	1291	0	-0.42934
NonTargeting_Human_0903	1	0.33458	0.33416	0.988905	706	0	-0.42766	0.66542	0.66639	0.966998	1290	0	-0.42766
NonTargeting_Human_0271	1	0.33524	0.33489	0.988905	707	0	-0.42795	0.66476	0.66572	0.966998	1289	0	-0.42795
PITPNM2	15	0.33545	0.61738	0.988905	708	5	-0.25758	0.32177	0.56506	0.965334	720	3	-0.25758
TAF10	15	0.3359	0.61784	0.988905	709	5	0.16892	0.076473	0.222	0.965334	234	3	0.16892
NonTargeting_Human_0065	1	0.33607	0.33574	0.988905	710	0	-0.36292	0.66393	0.66495	0.966998	1287	0	-0.36292
GET4	15	0.33617	0.6181	0.988905	711	3	0.057107	0.5645	0.75794	0.986849	1122	3	0.057107
NonTargeting_Human_0259	1	0.33698	0.33681	0.988905	712	0	-0.42642	0.66302	0.66406	0.966998	1286	0	-0.42642
NonTargeting_Human_0954	1	0.33722	0.33706	0.988905	713	0	-0.40183	0.66278	0.66383	0.966998	1285	0	-0.40183
ARPC5L	15	0.33726	0.61953	0.988905	714	3	0.056074	0.41212	0.64138	0.965932	885	3	0.056074
COPS2	15	0.3377	0.62	0.988905	715	4	-0.36924	0.3111	0.55286	0.965334	696	2	-0.36924
NonTargeting_Human_0779	1	0.33838	0.33825	0.988905	716	0	-0.42016	0.66162	0.66261	0.966998	1284	0	-0.42016
MDH1	15	0.33854	0.62083	0.988905	717	3	0.30762	0.36536	0.60652	0.965334	803	3	0.30762
NonTargeting_Human_0564	1	0.33879	0.33873	0.988905	718	0	-0.36911	0.66121	0.66208	0.966998	1283	0	-0.36911
NonTargeting_Human_0265	1	0.34019	0.34008	0.988905	719	0	-0.38126	0.65981	0.66087	0.966998	1281	0	-0.38126
NonTargeting_Human_0523	1	0.34028	0.34024	0.988905	720	0	-0.34015	0.65972	0.66079	0.966998	1280	0	-0.34015
TREM1	15	0.34242	0.62515	0.988905	721	4	-0.42881	0.40294	0.63451	0.965334	871	3	-0.42881
MCM3	15	0.3434	0.62624	0.988905	722	4	0.042032	0.38194	0.61848	0.965334	833	3	0.042032
NonTargeting_Human_0626	1	0.34366	0.34394	0.988905	723	0	-0.3644	0.65634	0.6578	0.966998	1278	0	-0.3644
NonTargeting_Human_0339	1	0.34613	0.34629	0.988905	724	0	-0.3974	0.65387	0.6552	0.966483	1277	0	-0.3974
NonTargeting_Human_0724	1	0.34663	0.34668	0.988905	725	0	-0.20569	0.65337	0.65468	0.966483	1275	0	-0.20569
CMAS	15	0.34674	0.62989	0.988905	726	5	-0.23917	0.36738	0.60801	0.965334	808	2	-0.23917
NonTargeting_Human_0696	1	0.3477	0.34773	0.988905	727	0	-0.38977	0.6523	0.65372	0.965932	1274	0	-0.38977
NonTargeting_Human_0322	1	0.34836	0.3484	0.988905	728	0	-0.3833	0.65164	0.65304	0.965932	1273	0	-0.3833
NonTargeting_Human_0501	1	0.34993	0.34994	0.988905	729	0	-0.3767	0.65007	0.65151	0.965932	1272	0	-0.3767
ANXA13	15	0.35008	0.63354	0.988905	730	5	-0.13199	0.12833	0.31792	0.965334	346	2	-0.13199
NonTargeting_Human_0952	1	0.35042	0.35045	0.988905	731	0	-0.23578	0.64958	0.65111	0.965932	1271	0	-0.23578
NonTargeting_Human_0066	1	0.3505	0.35055	0.988905	732	0	-0.34304	0.6495	0.65101	0.965932	1269	0	-0.34304
NonTargeting_Human_0464	1	0.35075	0.35083	0.988905	733	0	-0.2925	0.64925	0.65081	0.965932	1268	0	-0.2925
SETDB1	15	0.3513	0.63489	0.988905	734	2	0.22581	0.27222	0.50742	0.965334	628	4	0.22581
NonTargeting_Human_0098	1	0.35133	0.3514	0.988905	735	0	-0.34953	0.64867	0.65023	0.965932	1267	0	-0.34953
NonTargeting_Human_0179	1	0.35298	0.35309	0.988905	736	0	-0.28644	0.64702	0.64847	0.965932	1266	0	-0.28644
NonTargeting_Human_0238	1	0.35323	0.3533	0.988905	737	0	-0.3614	0.64677	0.64825	0.965932	1265	0	-0.3614
NonTargeting_Human_0923	1	0.35446	0.35456	0.988905	738	0	-0.37695	0.64554	0.64696	0.965932	1264	0	-0.37695
NonTargeting_Human_0483	1	0.35471	0.35479	0.988905	739	0	-0.0996	0.64529	0.64669	0.965932	1262	0	-0.0996
NonTargeting_Human_0591	1	0.35487	0.35494	0.988905	740	0	-0.36823	0.64513	0.64656	0.965932	1261	0	-0.36823
GTPBP5	15	0.35494	0.6387	0.988905	741	4	-0.1256	0.14397	0.34546	0.965334	378	5	-0.1256
KRTAP4-2	15	0.35566	0.63954	0.988905	742	4	0.32069	0.12771	0.31691	0.965334	345	5	0.32069
DNAJC13	15	0.35567	0.63956	0.988905	743	5	0.17035	0.23092	0.45878	0.965334	558	4	0.17035
NonTargeting_Human_0044	1	0.35677	0.35677	0.988905	744	0	-0.30016	0.64323	0.64451	0.965932	1260	0	-0.30016
ZBTB44	15	0.35681	0.6408	0.988905	745	2	0.26444	0.12976	0.32043	0.965334	350	4	0.26444
NonTargeting_Human_0112	1	0.35751	0.3575	0.988905	746	0	-0.23912	0.64249	0.64375	0.965932	1259	0	-0.23912
DGKK	15	0.35763	0.64168	0.988905	747	4	0.039049	0.032205	0.11595	0.948682	137	3	0.039049
DCPS	15	0.35988	0.64411	0.988905	748	5	-0.35473	0.18856	0.40804	0.965334	469	4	-0.35473
ELP5	15	0.36212	0.64659	0.988905	749	5	-0.36388	0.50427	0.71034	0.982677	1030	2	-0.36388
NonTargeting_Human_0620	1	0.36222	0.36201	0.988905	750	0	-0.054937	0.63778	0.63902	0.965334	1256	0	-0.054937
EWSR1	15	0.36268	0.64721	0.988905	751	5	-0.040826	0.20561	0.42857	0.965334	506	4	-0.040826
NonTargeting_Human_0915	1	0.36279	0.36257	0.988905	752	0	-0.33691	0.63721	0.63842	0.965334	1254	0	-0.33691
NonTargeting_Human_0518	1	0.36288	0.36267	0.988905	753	0	-0.34053	0.63712	0.63833	0.965334	1253	0	-0.34053
NonTargeting_Human_0375	1	0.36296	0.36275	0.988905	754	0	-0.35998	0.63704	0.63824	0.965334	1252	0	-0.35998
NonTargeting_Human_0842	1	0.36337	0.36324	0.988905	755	0	-0.35078	0.63663	0.63779	0.965334	1251	0	-0.35078
DYNLL1	14	0.36409	0.63361	0.988905	756	4	0.69085	0.00099927	0.0059276	0.549244	17	6	0.69085
NonTargeting_Human_0399	1	0.36477	0.36455	0.988905	757	0	-0.31262	0.63523	0.63648	0.965334	1250	0	-0.31262
KCTD5	15	0.36621	0.65056	0.988905	758	4	0.40211	0.13885	0.33627	0.965334	373	4	0.40211
NonTargeting_Human_0986	1	0.36642	0.36633	0.988905	759	0	-0.34231	0.63358	0.6348	0.965334	1248	0	-0.34231
ZNF263	15	0.36667	0.65091	0.988905	760	3	-0.080011	0.6293	0.79669	0.988967	1239	2	-0.080011
PLA2G10	15	0.36694	0.65113	0.988905	761	4	-0.10426	0.46833	0.68309	0.972341	979	2	-0.10426
NonTargeting_Human_0645	1	0.36733	0.36727	0.988905	762	0	-0.28855	0.63267	0.63399	0.965334	1247	0	-0.28855
NonTargeting_Human_0056	1	0.36799	0.36797	0.988905	763	0	-0.3138	0.63201	0.63321	0.965334	1245	0	-0.3138
NonTargeting_Human_0002	1	0.36832	0.36829	0.988905	764	0	-0.34785	0.63168	0.63286	0.965334	1244	0	-0.34785
NonTargeting_Human_0465	1	0.36865	0.36862	0.988905	765	0	-0.34713	0.63135	0.63257	0.965334	1243	0	-0.34713
TOMM22	15	0.36912	0.65255	0.988905	766	4	-0.2356	0.80382	0.88743	0.999997	1478	1	-0.2356
NonTargeting_Human_0632	1	0.36947	0.36948	0.988905	767	0	-0.34093	0.63053	0.63178	0.965334	1242	0	-0.34093
NonTargeting_Human_0012	1	0.36989	0.36987	0.988905	768	0	-0.32135	0.63011	0.6313	0.965334	1241	0	-0.32135
NonTargeting_Human_0062	1	0.37137	0.37124	0.988905	769	0	-0.33705	0.62863	0.62958	0.965334	1238	0	-0.33705
SPAG7	15	0.37192	0.65464	0.988905	770	4	0.016049	0.74076	0.85056	0.996179	1394	2	0.016049
NonTargeting_Human_0421	1	0.37244	0.37236	0.988905	771	0	-0.33447	0.62756	0.62848	0.965334	1237	0	-0.33447
SNF8	15	0.373	0.65545	0.988905	772	3	0.0044536	0.21053	0.4344	0.965334	516	3	0.0044536
NCOR1	14	0.37377	0.64185	0.988905	773	4	-0.30877	0.60607	0.7707	0.988967	1200	1	-0.30877
CLEC3B	15	0.3738	0.6561	0.988905	774	4	-0.35913	0.88243	0.91945	0.999997	1571	1	-0.35913
NonTargeting_Human_0766	1	0.37442	0.37452	0.988905	775	0	-0.33275	0.62558	0.62645	0.965334	1234	0	-0.33275
NonTargeting_Human_0087	1	0.37451	0.37462	0.988905	776	0	-0.32449	0.62549	0.62637	0.965334	1233	0	-0.32449
EHD2	15	0.37548	0.65736	0.988905	777	3	0.10368	0.15649	0.36719	0.965334	409	4	0.10368
NonTargeting_Human_0458	1	0.37566	0.37571	0.988905	778	0	-0.32099	0.62434	0.6252	0.965334	1231	0	-0.32099
NonTargeting_Human_0984	1	0.37574	0.37583	0.988905	779	0	-0.32308	0.62426	0.62516	0.965334	1230	0	-0.32308
ROR1	15	0.37659	0.65832	0.988905	780	4	-0.092078	0.78519	0.87582	0.999997	1451	1	-0.092078
NonTargeting_Human_0813	1	0.37698	0.37702	0.988905	781	0	-0.32291	0.62302	0.62373	0.965334	1228	0	-0.32291
NonTargeting_Human_0318	1	0.37731	0.37733	0.988905	782	0	-0.31746	0.62269	0.62343	0.965334	1227	0	-0.31746
GNB1L	15	0.37734	0.65887	0.988905	783	3	0.2745	0.17214	0.38768	0.965334	438	4	0.2745
NonTargeting_Human_0211	1	0.37739	0.37742	0.988905	784	0	-0.31276	0.62261	0.62332	0.965334	1226	0	-0.31276
NXF2	14	0.37757	0.64507	0.988905	785	4	0.023159	0.036898	0.12765	0.948682	152	5	0.023159
KDM8	15	0.37846	0.65972	0.988905	786	4	-0.38789	0.028683	0.10631	0.948682	120	1	-0.38789
ZBTB37	15	0.37871	0.65988	0.988905	787	3	0.10548	0.2674	0.50162	0.965334	614	3	0.10548
HIST2H2AA3	15	0.37877	0.65994	0.988905	788	4	0.40857	0.26413	0.49778	0.965334	605	4	0.40857
NonTargeting_Human_0169	1	0.37879	0.37889	0.988905	789	0	-0.23096	0.62121	0.62191	0.965334	1224	0	-0.23096
NonTargeting_Human_0810	1	0.37904	0.37912	0.988905	790	0	-0.20336	0.62096	0.62169	0.965334	1223	0	-0.20336
NonTargeting_Human_0936	1	0.38028	0.3804	0.988905	791	0	-0.31909	0.61972	0.62024	0.965334	1222	0	-0.31909
NonTargeting_Human_0434	1	0.3811	0.38134	0.988905	792	0	-0.27002	0.6189	0.61955	0.965334	1221	0	-0.27002
NonTargeting_Human_0111	1	0.38119	0.38143	0.988905	793	0	-0.28366	0.61881	0.61944	0.965334	1220	0	-0.28366
MSI2	15	0.38148	0.66194	0.988905	794	2	0.41667	0.51062	0.71557	0.982717	1046	3	0.41667
NonTargeting_Human_0364	1	0.38209	0.38241	0.988905	795	0	-0.11895	0.61791	0.61864	0.965334	1219	0	-0.11895
NonTargeting_Human_0095	1	0.38284	0.38312	0.988905	796	0	-0.31458	0.61716	0.61787	0.965334	1217	0	-0.31458
NonTargeting_Human_0393	1	0.38333	0.38365	0.988905	797	0	-0.31122	0.61667	0.61747	0.965334	1216	0	-0.31122
PDRG1	14	0.38374	0.65019	0.988905	798	2	0.0047978	0.021482	0.081431	0.948682	100	3	0.0047978
GPN1	14	0.38417	0.65056	0.988905	799	3	0.22416	0.29377	0.53224	0.965334	664	2	0.22416
CTIF	15	0.38438	0.66431	0.988905	800	4	0.0024027	0.87286	0.91621	0.999997	1553	1	0.0024027
NonTargeting_Human_0008	1	0.3844	0.38469	0.988905	801	0	-0.30512	0.6156	0.61639	0.965334	1215	0	-0.30512
NonTargeting_Human_0649	1	0.3849	0.38518	0.988905	802	0	-0.30921	0.6151	0.6158	0.965334	1214	0	-0.30921
SYP	14	0.38609	0.65214	0.988905	803	4	-0.23573	0.99867	0.99856	0.999997	1737	0	-0.23573
C21orf59	15	0.38719	0.66653	0.988905	804	4	0.33266	0.096748	0.26065	0.965334	281	4	0.33266
FAM104A	15	0.38812	0.66722	0.988905	805	4	0.78107	0.0029247	0.016372	0.800743	29	8	0.78107
NonTargeting_Human_0859	1	0.38853	0.38893	0.988905	806	0	-0.28861	0.61147	0.61208	0.965334	1212	0	-0.28861
NonTargeting_Human_0823	1	0.38869	0.38911	0.988905	807	0	-0.29894	0.61131	0.61192	0.965334	1211	0	-0.29894
NonTargeting_Human_0250	1	0.38968	0.39002	0.988905	808	0	-0.24251	0.61032	0.611	0.965334	1210	0	-0.24251
NonTargeting_Human_0559	1	0.39009	0.39038	0.988905	809	0	-0.29717	0.60991	0.61066	0.965334	1209	0	-0.29717
GAGE1	14	0.39039	0.65564	0.988905	810	4	-0.097625	0.27981	0.5151	0.965334	642	3	-0.097625
NonTargeting_Human_0219	1	0.391	0.39136	0.988905	811	0	-0.29383	0.609	0.60974	0.965334	1208	0	-0.29383
NonTargeting_Human_0028	1	0.39117	0.39152	0.988905	812	0	-0.26344	0.60883	0.60957	0.965334	1207	0	-0.26344
NonTargeting_Human_0277	1	0.39141	0.39178	0.988905	813	0	-0.27772	0.60859	0.60929	0.965334	1206	0	-0.27772
SPATA25	15	0.3916	0.66993	0.988905	814	3	0.28042	0.038057	0.13192	0.948682	155	5	0.28042
CHP1	15	0.39194	0.67025	0.988905	815	2	-0.089832	0.030128	0.11026	0.948682	127	5	-0.089832
NonTargeting_Human_0225	1	0.39249	0.3929	0.988905	816	0	-0.26768	0.60751	0.60819	0.965334	1203	0	-0.26768
NonTargeting_Human_0956	1	0.39306	0.39347	0.988905	817	0	-0.25677	0.60694	0.60754	0.965334	1202	0	-0.25677
TCERG1	15	0.39311	0.67109	0.988905	818	4	-0.1215	0.23201	0.46008	0.965334	559	3	-0.1215
NonTargeting_Human_0391	1	0.39339	0.39372	0.988905	819	0	-0.28968	0.60661	0.60726	0.965334	1201	0	-0.28968
NonTargeting_Human_0727	1	0.39405	0.39442	0.988905	820	0	-0.22627	0.60595	0.60666	0.965334	1199	0	-0.22627
VOPP1	14	0.39408	0.65882	0.988905	821	4	0.042211	0.94252	0.94353	0.999997	1638	1	0.042211
NonTargeting_Human_0321	1	0.3943	0.39461	0.988905	822	0	-0.28481	0.6057	0.60639	0.965334	1198	0	-0.28481
NonTargeting_Human_0798	1	0.39513	0.39544	0.988905	823	0	-0.27399	0.60487	0.60574	0.965334	1197	0	-0.27399
NonTargeting_Human_0003	1	0.39546	0.39567	0.988905	824	0	-0.23877	0.60454	0.6054	0.965334	1196	0	-0.23877
NonTargeting_Human_0712	1	0.39554	0.39577	0.988905	825	0	-0.25221	0.60446	0.6053	0.965334	1195	0	-0.25221
RDH14	15	0.39682	0.674	0.988905	826	3	0.22771	0.14957	0.35559	0.965334	391	4	0.22771
NonTargeting_Human_0306	1	0.40156	0.40164	0.988905	827	0	-0.27132	0.59844	0.59881	0.965334	1193	0	-0.27132
NonTargeting_Human_0041	1	0.40164	0.40171	0.988905	828	0	-0.2678	0.59836	0.59876	0.965334	1192	0	-0.2678
GP1BB	15	0.40197	0.67766	0.988905	829	3	-0.20911	0.2843	0.52171	0.965334	651	3	-0.20911
NonTargeting_Human_0121	1	0.40222	0.40231	0.988905	830	0	-0.24184	0.59778	0.5982	0.965334	1191	0	-0.24184
NonTargeting_Human_0907	1	0.40288	0.40285	0.988905	831	0	-0.23754	0.59712	0.59749	0.965334	1190	0	-0.23754
NonTargeting_Human_0226	1	0.40346	0.40341	0.988905	832	0	-0.25536	0.59654	0.59685	0.965334	1188	0	-0.25536
SLX4	15	0.40402	0.67923	0.988905	833	3	0.30372	0.60757	0.78723	0.988967	1204	2	0.30372
NonTargeting_Human_0651	1	0.4042	0.40402	0.988905	834	0	-0.21268	0.5958	0.59608	0.965334	1187	0	-0.21268
NonTargeting_Human_0585	1	0.40502	0.40492	0.988905	835	0	-0.2605	0.59498	0.59532	0.965334	1185	0	-0.2605
NonTargeting_Human_0586	1	0.40626	0.40627	0.988905	836	0	-0.26232	0.59374	0.59402	0.965334	1184	0	-0.26232
NonTargeting_Human_0134	1	0.40684	0.40687	0.988905	837	0	-0.22575	0.59316	0.59354	0.965334	1182	0	-0.22575
NonTargeting_Human_0356	1	0.4075	0.40767	0.988905	838	0	-0.25571	0.5925	0.59295	0.965334	1181	0	-0.25571
AIM1	15	0.40807	0.68212	0.988905	839	3	0.057842	0.62965	0.79682	0.988967	1240	2	0.057842
NonTargeting_Human_0300	1	0.40865	0.40879	0.988905	840	0	-0.23625	0.59135	0.59172	0.965334	1179	0	-0.23625
NonTargeting_Human_0409	1	0.40931	0.4095	0.988905	841	0	-0.24052	0.59069	0.59109	0.965334	1177	0	-0.24052
NonTargeting_Human_0603	1	0.40981	0.41	0.988905	842	0	-0.25258	0.59019	0.59067	0.965334	1175	0	-0.25258
NonTargeting_Human_0276	1	0.41005	0.41025	0.988905	843	0	-0.25614	0.58995	0.59045	0.965334	1174	0	-0.25614
NonTargeting_Human_0555	1	0.41096	0.41116	0.988905	844	0	-0.24459	0.58904	0.58943	0.965334	1171	0	-0.24459
ZFR	15	0.41185	0.68519	0.988905	845	4	0.50243	0.00646	0.031994	0.902682	46	5	0.50243
NonTargeting_Human_0536	1	0.41195	0.41197	0.988905	846	0	-0.2137	0.58805	0.58842	0.965334	1170	0	-0.2137
NonTargeting_Human_0850	1	0.41278	0.41283	0.988905	847	0	-0.24946	0.58722	0.58764	0.965334	1168	0	-0.24946
NonTargeting_Human_0182	1	0.41286	0.41293	0.988905	848	0	-0.22203	0.58714	0.58755	0.965334	1167	0	-0.22203
NonTargeting_Human_0189	1	0.41459	0.41467	0.988905	849	0	-0.20842	0.58541	0.58583	0.965334	1166	0	-0.20842
NonTargeting_Human_0870	1	0.41476	0.41483	0.988905	850	0	-0.23205	0.58524	0.58559	0.965334	1165	0	-0.23205
FAM21A	15	0.41484	0.68734	0.988905	851	3	0.20985	0.44914	0.66827	0.966998	941	3	0.20985
NonTargeting_Human_0085	1	0.41484	0.4149	0.988905	852	0	-0.23496	0.58516	0.58557	0.965334	1164	0	-0.23496
NonTargeting_Human_0040	1	0.41575	0.41583	0.988905	853	0	-0.22644	0.58425	0.58459	0.965334	1163	0	-0.22644
NonTargeting_Human_0927	1	0.41591	0.416	0.988905	854	0	-0.1488	0.58409	0.58443	0.965334	1162	0	-0.1488
RNF151	15	0.41619	0.6883	0.988905	855	2	0.13073	0.35434	0.59806	0.965334	783	3	0.13073
SLAMF6	15	0.4171	0.68901	0.988905	856	1	0.10604	0.3727	0.61158	0.965334	814	2	0.10604
NonTargeting_Human_0653	1	0.41715	0.41729	0.988905	857	0	-0.23319	0.58285	0.58328	0.965334	1160	0	-0.23319
NonTargeting_Human_0787	1	0.41904	0.41927	0.988905	858	0	-0.13516	0.58096	0.5814	0.965334	1158	0	-0.13516
HIST1H2BB	15	0.41934	0.69078	0.988905	859	3	0.43962	0.045404	0.1521	0.963532	166	4	0.43962
NonTargeting_Human_0910	1	0.41987	0.42012	0.988905	860	0	-0.23525	0.58013	0.58059	0.965334	1156	0	-0.23525
NonTargeting_Human_0754	1	0.41995	0.42018	0.988905	861	0	-0.22259	0.58005	0.58054	0.965334	1155	0	-0.22259
NonTargeting_Human_0398	1	0.4221	0.42212	0.988905	862	0	-0.23028	0.5779	0.57813	0.965334	1154	0	-0.23028
NonTargeting_Human_0853	1	0.42234	0.42237	0.988905	863	0	-0.21114	0.57766	0.57787	0.965334	1153	0	-0.21114
NonTargeting_Human_0063	1	0.42325	0.42322	0.988905	864	0	-0.22415	0.57675	0.57687	0.965334	1152	0	-0.22415
NonTargeting_Human_0917	1	0.42333	0.42332	0.988905	865	0	-0.22141	0.57667	0.57682	0.965334	1151	0	-0.22141
TMEM221	15	0.4234	0.69374	0.988905	866	3	0.30085	0.080033	0.22895	0.965334	241	5	0.30085
NonTargeting_Human_0456	1	0.42391	0.42389	0.988905	867	0	-0.2253	0.57609	0.57621	0.965334	1150	0	-0.2253
NonTargeting_Human_0407	1	0.42416	0.42409	0.988905	868	0	-0.17472	0.57584	0.57594	0.965334	1149	0	-0.17472
NonTargeting_Human_0099	1	0.42424	0.42418	0.988905	869	0	-0.073267	0.57576	0.57586	0.965334	1148	0	-0.073267
NonTargeting_Human_0414	1	0.42449	0.42439	0.988905	870	0	-0.22201	0.57551	0.57568	0.965334	1147	0	-0.22201
NonTargeting_Human_0500	1	0.42581	0.42565	0.988905	871	0	-0.20211	0.57419	0.57434	0.965334	1144	0	-0.20211
NonTargeting_Human_0247	1	0.42606	0.42591	0.988905	872	0	-0.20446	0.57394	0.57408	0.965334	1143	0	-0.20446
SSX4	15	0.4261	0.69582	0.988905	873	2	-0.29512	0.091145	0.25029	0.965334	267	3	-0.29512
SUSD5	15	0.42674	0.69636	0.988905	874	3	0.36418	0.039291	0.13526	0.948682	160	4	0.36418
NonTargeting_Human_0252	1	0.42713	0.42696	0.988905	875	0	-0.2072	0.57287	0.573	0.965334	1142	0	-0.2072
NonTargeting_Human_0827	1	0.42738	0.4272	0.988905	876	0	-0.098952	0.57262	0.57275	0.965334	1141	0	-0.098952
NonTargeting_Human_0840	1	0.42754	0.42735	0.988905	877	0	-0.21037	0.57246	0.57261	0.965334	1140	0	-0.21037
NonTargeting_Human_0574	1	0.42779	0.42757	0.988905	878	0	-0.14379	0.57221	0.57228	0.965334	1139	0	-0.14379
NonTargeting_Human_0107	1	0.42804	0.42782	0.988905	879	0	-0.20668	0.57196	0.57209	0.965334	1138	0	-0.20668
MEF2B	15	0.429	0.69798	0.988905	880	4	-0.13512	0.0031113	0.017284	0.813575	31	4	-0.13512
NonTargeting_Human_0745	1	0.42919	0.42892	0.988905	881	0	-0.21485	0.57081	0.57094	0.965334	1137	0	-0.21485
SNAPC3	15	0.42968	0.69852	0.988905	882	3	-0.007926	0.88159	0.91917	0.999997	1568	1	-0.007926
NonTargeting_Human_0642	1	0.42977	0.4295	0.988905	883	0	-0.20987	0.57023	0.57038	0.965334	1135	0	-0.20987
SPNS1	15	0.43014	0.69882	0.988905	884	3	0.15838	0.28925	0.52767	0.965334	659	4	0.15838
NonTargeting_Human_0590	1	0.43034	0.43016	0.988905	885	0	-0.18344	0.56966	0.56984	0.965334	1134	0	-0.18344
MCCC2	15	0.43041	0.69903	0.988905	886	3	0.26071	0.19443	0.41525	0.965334	479	3	0.26071
NonTargeting_Human_0152	1	0.43125	0.43105	0.988905	887	0	-0.21	0.56875	0.56882	0.965334	1133	0	-0.21
CHMP1A	15	0.43188	0.70012	0.988905	888	1	0.073284	0.96867	0.96854	0.999997	1687	0	0.073284
NonTargeting_Human_0187	1	0.43191	0.43165	0.988905	889	0	-0.060802	0.56809	0.56818	0.965334	1132	0	-0.060802
NonTargeting_Human_0433	1	0.43241	0.43209	0.988905	890	0	-0.20179	0.56759	0.56764	0.965334	1131	0	-0.20179
NonTargeting_Human_0377	1	0.43249	0.43223	0.988905	891	0	-0.032779	0.56751	0.56754	0.965334	1130	0	-0.032779
NonTargeting_Human_0950	1	0.4334	0.43313	0.988905	892	0	-0.16469	0.5666	0.5667	0.965334	1127	0	-0.16469
NonTargeting_Human_0968	1	0.43364	0.43341	0.988905	893	0	-0.20431	0.56636	0.56644	0.965334	1126	0	-0.20431
NonTargeting_Human_0874	1	0.43381	0.43354	0.988905	894	0	-0.17902	0.56619	0.56634	0.965334	1125	0	-0.17902
NonTargeting_Human_0955	1	0.43513	0.43495	0.988905	895	0	-0.026384	0.56487	0.56499	0.965334	1124	0	-0.026384
NonTargeting_Human_0154	1	0.43538	0.43516	0.988905	896	0	-0.16243	0.56462	0.5647	0.965334	1123	0	-0.16243
NonTargeting_Human_0709	1	0.43694	0.43668	0.988905	897	0	-0.091742	0.56306	0.56306	0.965334	1119	0	-0.091742
NonTargeting_Human_0196	1	0.43703	0.4368	0.988905	898	0	-0.19293	0.56297	0.56297	0.965334	1118	0	-0.19293
NonTargeting_Human_0596	1	0.43777	0.43758	0.988905	899	0	-0.17487	0.56223	0.56222	0.965334	1117	0	-0.17487
NonTargeting_Human_0972	1	0.43884	0.43856	0.988905	900	0	-0.16223	0.56116	0.56097	0.965334	1116	0	-0.16223
SPRN	15	0.44146	0.70694	0.988905	901	4	-0.061817	0.92894	0.93862	0.999997	1622	1	-0.061817
NonTargeting_Human_0593	1	0.44164	0.4413	0.988905	902	0	-0.13551	0.55836	0.5582	0.965334	1115	0	-0.13551
TBX1	15	0.443	0.70822	0.988905	903	4	0.061621	0.49545	0.70336	0.981106	1012	3	0.061621
NonTargeting_Human_0869	1	0.44486	0.44466	0.988905	904	0	-0.1587	0.55514	0.55483	0.965334	1113	0	-0.1587
RPL13A	11	0.44749	0.67021	0.988905	905	2	1.3809	0.0074779	0.032538	0.902682	53	5	1.3809
NonTargeting_Human_0043	1	0.44767	0.44747	0.988905	906	0	-0.16087	0.55233	0.55195	0.965334	1110	0	-0.16087
NSFL1C	15	0.44799	0.71171	0.988905	907	4	0.292	0.34124	0.58722	0.965334	765	4	0.292
NonTargeting_Human_0078	1	0.44882	0.44861	0.988905	908	0	-0.14459	0.55118	0.55066	0.965334	1108	0	-0.14459
MAOB	15	0.44985	0.71309	0.988905	909	2	0.29398	0.014134	0.061493	0.948682	79	5	0.29398
NonTargeting_Human_0735	1	0.45097	0.45059	0.988905	910	0	-0.1682	0.54903	0.54851	0.965334	1106	0	-0.1682
NonTargeting_Human_0557	1	0.45105	0.45068	0.988905	911	0	-0.16777	0.54895	0.54845	0.965334	1105	0	-0.16777
ALG14	15	0.45232	0.71502	0.988905	912	3	-0.30451	0.95425	0.95493	0.999997	1663	1	-0.30451
NonTargeting_Human_0138	1	0.4527	0.45244	0.988905	913	0	-0.1461	0.5473	0.54685	0.965334	1103	0	-0.1461
NonTargeting_Human_0042	1	0.45319	0.45289	0.988905	914	0	-0.089854	0.54681	0.54638	0.965334	1102	0	-0.089854
NonTargeting_Human_0837	1	0.45468	0.45448	0.988905	915	0	-0.15035	0.54532	0.5448	0.965334	1101	0	-0.15035
NonTargeting_Human_0819	1	0.45517	0.45502	0.988905	916	0	-0.15622	0.54483	0.54419	0.965334	1100	0	-0.15622
NOTCH2NL	15	0.4554	0.71722	0.988905	917	2	0.47082	0.021903	0.086937	0.948682	102	5	0.47082
LYZ	15	0.45636	0.71781	0.988905	918	4	-0.086164	0.65719	0.80885	0.989313	1279	2	-0.086164
NonTargeting_Human_0151	1	0.45707	0.45681	0.988905	919	0	-0.15154	0.54293	0.54225	0.965334	1099	0	-0.15154
NonTargeting_Human_0617	1	0.45765	0.45741	0.988905	920	0	-0.1476	0.54235	0.54164	0.965334	1098	0	-0.1476
HMOX2	15	0.45802	0.71923	0.988905	921	4	-0.1199	0.62256	0.7939	0.988967	1225	2	-0.1199
NonTargeting_Human_0468	1	0.45806	0.45772	0.988905	922	0	-0.14549	0.54194	0.54122	0.965334	1097	0	-0.14549
EIF5A	15	0.45846	0.71956	0.988905	923	3	-0.16191	0.49283	0.70132	0.980733	1008	1	-0.16191
NonTargeting_Human_0010	1	0.4588	0.45851	0.988905	924	0	-0.14963	0.5412	0.54051	0.965334	1095	0	-0.14963
TRIM8	15	0.45969	0.7204	0.988905	925	3	0.2216	0.027479	0.10293	0.948682	115	5	0.2216
NonTargeting_Human_0347	1	0.45979	0.45953	0.988905	926	0	-0.14369	0.54021	0.53954	0.965334	1094	0	-0.14369
NonTargeting_Human_0060	1	0.46004	0.45983	0.988905	927	0	-0.14787	0.53996	0.53923	0.965334	1093	0	-0.14787
NonTargeting_Human_0641	1	0.46029	0.46004	0.988905	928	0	-0.083033	0.53971	0.53888	0.965334	1092	0	-0.083033
NonTargeting_Human_0707	1	0.46045	0.46017	0.988905	929	0	-0.1467	0.53955	0.53872	0.965334	1091	0	-0.1467
NonTargeting_Human_0631	1	0.46185	0.46168	0.988905	930	0	-0.13233	0.53815	0.53734	0.965334	1089	0	-0.13233
RPUSD4	15	0.46326	0.72317	0.988905	931	2	-0.11422	0.44201	0.66307	0.966998	932	1	-0.11422
WBSCR16	15	0.46349	0.72335	0.988905	932	4	-0.23705	0.77509	0.86998	0.999997	1435	2	-0.23705
PSMD9	15	0.4638	0.72366	0.988905	933	4	0.0465	0.36578	0.6068	0.965334	806	3	0.0465
NonTargeting_Human_0426	1	0.46424	0.46426	0.988905	934	0	-0.089097	0.53576	0.53504	0.965334	1087	0	-0.089097
NonTargeting_Human_0329	1	0.46449	0.46449	0.988905	935	0	-0.12771	0.53551	0.53472	0.965334	1086	0	-0.12771
PDGFA	15	0.46631	0.72548	0.988905	936	3	-0.096997	0.99601	0.99591	0.999997	1731	0	-0.096997
TPI1	15	0.46807	0.72685	0.988905	937	3	0.84609	0.0015934	0.0092921	0.691192	22	8	0.84609
NonTargeting_Human_0546	1	0.46837	0.46811	0.988905	938	0	-0.12761	0.53163	0.53107	0.965334	1082	0	-0.12761
NonTargeting_Human_0343	1	0.46845	0.46818	0.988905	939	0	-0.089001	0.53155	0.531	0.965334	1081	0	-0.089001
NonTargeting_Human_0504	1	0.46948	0.46916	0.988905	940	0	-0.1044	0.53052	0.53007	0.965334	1080	0	-0.1044
GPR52	15	0.47021	0.72843	0.988905	941	2	0.32443	0.07919	0.22708	0.965334	239	3	0.32443
NonTargeting_Human_0069	1	0.4706	0.47032	0.988905	942	0	-0.12216	0.5294	0.52895	0.965334	1078	0	-0.12216
NonTargeting_Human_0742	1	0.47068	0.4704	0.988905	943	0	-0.11497	0.52932	0.52883	0.965334	1077	0	-0.11497
NonTargeting_Human_0323	1	0.47142	0.47126	0.988905	944	0	-0.078588	0.52858	0.52793	0.965334	1076	0	-0.078588
NonTargeting_Human_0240	1	0.47208	0.47188	0.988905	945	0	-0.11448	0.52792	0.52732	0.965334	1075	0	-0.11448
NonTargeting_Human_0975	1	0.47282	0.47268	0.988905	946	0	-0.1179	0.52718	0.52677	0.965334	1073	0	-0.1179
RAB28	15	0.47345	0.73085	0.988905	947	2	-0.08721	0.054838	0.17709	0.963532	195	3	-0.08721
EXOC7	15	0.47481	0.7318	0.988905	948	3	-0.10172	0.0298	0.10946	0.948682	125	6	-0.10172
NonTargeting_Human_0614	1	0.4753	0.47516	0.988905	949	0	-0.10685	0.5247	0.52448	0.965334	1070	0	-0.10685
NonTargeting_Human_0230	1	0.47546	0.47527	0.988905	950	0	-0.063437	0.52454	0.52438	0.965334	1069	0	-0.063437
NLRP8	14	0.47619	0.7276	0.988905	951	4	0.4256	0.10853	0.27983	0.965334	306	3	0.4256
NonTargeting_Human_0774	1	0.47711	0.47696	0.988905	952	0	-0.042631	0.52289	0.52261	0.965334	1068	0	-0.042631
BID	15	0.47799	0.73397	0.988905	953	4	-0.21081	0.94929	0.95097	0.999997	1653	1	-0.21081
ICA1L	15	0.47926	0.73494	0.988905	954	3	0.013345	0.22644	0.45364	0.965334	548	4	0.013345
FNTB	15	0.47969	0.73525	0.988905	955	3	-0.29727	0.11608	0.29673	0.965334	322	4	-0.29727
NonTargeting_Human_0009	1	0.48016	0.47995	0.988905	956	0	-0.082069	0.51984	0.51935	0.965334	1066	0	-0.082069
NonTargeting_Human_0871	1	0.48033	0.48005	0.988905	957	0	-0.098585	0.51967	0.51915	0.965334	1065	0	-0.098585
NonTargeting_Human_0646	1	0.48157	0.48123	0.988905	958	0	-0.067819	0.51843	0.51798	0.965334	1064	0	-0.067819
NonTargeting_Human_0376	1	0.48165	0.48133	0.988905	959	0	-0.094905	0.51835	0.51792	0.965334	1063	0	-0.094905
NonTargeting_Human_0661	1	0.48256	0.48224	0.988905	960	0	-0.086219	0.51744	0.51699	0.965334	1062	0	-0.086219
NonTargeting_Human_0838	1	0.4828	0.48248	0.988905	961	0	-0.028568	0.5172	0.51671	0.965334	1060	0	-0.028568
GPBP1L1	15	0.48356	0.73815	0.988905	962	3	0.16975	0.64241	0.80225	0.988967	1258	2	0.16975
NonTargeting_Human_0795	1	0.48371	0.48336	0.988905	963	0	-0.020283	0.51629	0.5158	0.965334	1058	0	-0.020283
NonTargeting_Human_0007	1	0.4847	0.48452	0.988905	964	0	-0.072232	0.5153	0.51491	0.965334	1057	0	-0.072232
NonTargeting_Human_0730	1	0.48577	0.48562	0.988905	965	0	-0.087048	0.51423	0.51388	0.965334	1056	0	-0.087048
NonTargeting_Human_0110	1	0.48594	0.48572	0.988905	966	0	-0.010662	0.51406	0.51371	0.965334	1055	0	-0.010662
METTL14	15	0.48611	0.74003	0.988905	967	3	-0.32593	0.22716	0.45444	0.965334	550	3	-0.32593
NonTargeting_Human_0335	1	0.48635	0.48611	0.988905	968	0	-0.060583	0.51365	0.51331	0.965334	1054	0	-0.060583
NonTargeting_Human_0931	1	0.4866	0.48636	0.988905	969	0	-0.018019	0.5134	0.5131	0.965334	1053	0	-0.018019
NonTargeting_Human_0510	1	0.48693	0.48672	0.988905	970	0	-0.079401	0.51307	0.51274	0.965334	1052	0	-0.079401
ACTR6	14	0.4878	0.73694	0.988905	971	4	-0.24865	0.90847	0.92202	0.999997	1596	1	-0.24865
NonTargeting_Human_0013	1	0.48841	0.48825	0.988905	972	0	-0.079812	0.51159	0.51139	0.965334	1050	0	-0.079812
NonTargeting_Human_0054	1	0.48874	0.48861	0.988905	973	0	-0.078684	0.51126	0.51101	0.965334	1048	0	-0.078684
NonTargeting_Human_0346	1	0.48932	0.48903	0.988905	974	0	-0.056628	0.51068	0.51044	0.965334	1047	0	-0.056628
NonTargeting_Human_0103	1	0.48998	0.48963	0.988905	975	0	-0.065736	0.51002	0.50975	0.965334	1045	0	-0.065736
NELFA	15	0.49019	0.74289	0.988905	976	3	-0.11798	0.19759	0.4191	0.965334	490	4	-0.11798
NonTargeting_Human_0497	1	0.49064	0.49037	0.988905	977	0	-0.035204	0.50936	0.50917	0.965334	1044	0	-0.035204
NonTargeting_Human_0914	1	0.49146	0.4912	0.988905	978	0	-0.010237	0.50854	0.50828	0.965334	1043	0	-0.010237
NonTargeting_Human_0503	1	0.49155	0.49128	0.988905	979	0	-0.0077453	0.50845	0.50822	0.965334	1042	0	-0.0077453
NonTargeting_Human_0744	1	0.49163	0.49131	0.988905	980	0	-0.062968	0.50837	0.50814	0.965334	1041	0	-0.062968
GART	15	0.4924	0.74447	0.988905	981	4	0.073482	0.0076453	0.036593	0.902682	55	3	0.073482
NonTargeting_Human_0381	1	0.49262	0.49237	0.988905	982	0	-0.039527	0.50738	0.50707	0.965334	1040	0	-0.039527
NonTargeting_Human_0637	1	0.49295	0.4927	0.988905	983	0	-0.064417	0.50705	0.50671	0.965334	1038	0	-0.064417
NonTargeting_Human_0027	1	0.4932	0.49287	0.988905	984	0	-0.021188	0.5068	0.50651	0.965334	1037	0	-0.021188
HDAC3	15	0.49347	0.74528	0.988905	985	3	0.53958	0.018469	0.076486	0.948682	87	4	0.53958
NonTargeting_Human_0384	1	0.49377	0.49348	0.988905	986	0	-0.059424	0.50623	0.50591	0.965334	1036	0	-0.059424
NonTargeting_Human_0556	1	0.49484	0.49462	0.988905	987	0	-0.025242	0.50516	0.50482	0.965334	1034	0	-0.025242
CAPZB	15	0.49515	0.74645	0.988905	988	4	0.2118	0.0086634	0.04053	0.902682	60	7	0.2118
NonTargeting_Human_0693	1	0.49526	0.49498	0.988905	989	0	-0.024245	0.50474	0.50435	0.965334	1032	0	-0.024245
NonTargeting_Human_0071	1	0.4955	0.49526	0.988905	990	0	-0.019551	0.5045	0.50413	0.965334	1031	0	-0.019551
NonTargeting_Human_0673	1	0.49583	0.4956	0.988905	991	0	-0.052684	0.50417	0.50384	0.965334	1029	0	-0.052684
NonTargeting_Human_0333	1	0.49592	0.49569	0.988905	992	0	-0.045383	0.50408	0.50376	0.965334	1027	0	-0.045383
NonTargeting_Human_0639	1	0.49608	0.49583	0.988905	993	0	-0.037238	0.50392	0.50363	0.965334	1026	0	-0.037238
NonTargeting_Human_0109	1	0.49724	0.49697	0.988905	994	0	-0.050067	0.50276	0.50259	0.965334	1024	0	-0.050067
NonTargeting_Human_0004	1	0.49757	0.49732	0.988905	995	0	-0.027377	0.50243	0.50234	0.965334	1023	0	-0.027377
NonTargeting_Human_0843	1	0.49765	0.49738	0.988905	996	0	-0.011447	0.50235	0.50219	0.965334	1022	0	-0.011447
NonTargeting_Human_0128	1	0.49781	0.49754	0.988905	997	0	-0.00013407	0.50219	0.50207	0.965334	1021	0	-0.00013407
NonTargeting_Human_0162	1	0.49798	0.49768	0.988905	998	0	-0.023569	0.50202	0.50185	0.965334	1020	0	-0.023569
hsa-mir-3680-1	10	0.4986	0.70308	0.988905	999	2	0.15324	0.57496	0.70469	0.981106	1146	2	0.15324
S100A14	15	0.49881	0.74928	0.988905	1000	3	0.013671	0.69855	0.82833	0.994766	1334	1	0.013671
NonTargeting_Human_0165	1	0.49913	0.49889	0.988905	1001	0	-0.037869	0.50087	0.50068	0.965334	1019	0	-0.037869
NonTargeting_Human_0480	1	0.50111	0.50097	0.988905	1002	0	-0.029314	0.49889	0.49859	0.965334	1017	0	-0.029314
NonTargeting_Human_0319	1	0.5012	0.50102	0.988905	1003	0	-0.0022345	0.4988	0.49851	0.965334	1016	0	-0.0022345
NonTargeting_Human_0176	1	0.50169	0.50145	0.988905	1004	0	-0.0047603	0.49831	0.49792	0.965334	1015	0	-0.0047603
STRAP	15	0.50194	0.75164	0.988905	1005	1	0.85168	0.0002324	0.0015038	0.37553	6	8	0.85168
NonTargeting_Human_0594	1	0.50301	0.50278	0.988905	1006	0	0.00044096	0.49699	0.49678	0.965334	1013	0	0.00044096
CCDC43	15	0.5058	0.75455	0.988905	1007	3	-0.24956	0.055752	0.1796	0.963532	196	6	-0.24956
C2orf49	15	0.50584	0.75456	0.988905	1008	4	-0.036071	0.24656	0.47764	0.965334	577	3	-0.036071
CLEC12B	15	0.50611	0.75477	0.988905	1009	4	-0.144	0.44308	0.664	0.966998	933	2	-0.144
NonTargeting_Human_0893	1	0.50656	0.50628	0.988905	1010	0	0.0098532	0.49344	0.49313	0.965334	1010	0	0.0098532
NonTargeting_Human_0677	1	0.5068	0.50651	0.988905	1011	0	0.0069691	0.4932	0.49287	0.965334	1009	0	0.0069691
hsa-mir-6508	8	0.50831	0.66816	0.988905	1012	2	0.35036	0.18026	0.33674	0.965334	454	3	0.35036
NonTargeting_Human_0689	1	0.50854	0.50828	0.988905	1013	0	0.017198	0.49146	0.4912	0.965334	1007	0	0.017198
C6orf62	14	0.50854	0.7541	0.988905	1014	4	0.2573	0.17697	0.38218	0.965334	444	3	0.2573
NAA38	15	0.50891	0.75679	0.988905	1015	3	0.86141	0.00034243	0.0023138	0.413779	8	7	0.86141
NonTargeting_Human_0146	1	0.51043	0.51018	0.988905	1016	0	0.011086	0.48957	0.48929	0.965334	1005	0	0.011086
NonTargeting_Human_0302	1	0.51052	0.51027	0.988905	1017	0	0.01088	0.48948	0.48921	0.965334	1004	0	0.01088
NonTargeting_Human_0576	1	0.51076	0.51053	0.988905	1018	0	0.050467	0.48924	0.48896	0.965334	1003	0	0.050467
ABCG5	15	0.51217	0.75932	0.988905	1019	3	0.034957	0.31546	0.55769	0.965334	703	3	0.034957
C19orf52	15	0.5128	0.75978	0.988905	1020	1	0.34158	0.043962	0.14838	0.963532	164	6	0.34158
FRYL	15	0.51301	0.75989	0.988905	1021	3	0.17367	0.14721	0.35145	0.965334	384	4	0.17367
NonTargeting_Human_0239	1	0.51316	0.51283	0.988905	1022	0	0.016733	0.48684	0.48663	0.965334	1002	0	0.016733
RPL28	15	0.51368	0.76036	0.988905	1023	3	0.5654	0.020791	0.083555	0.948682	95	6	0.5654
IRF2BP2	15	0.51406	0.76059	0.988905	1024	2	0.41353	0.62381	0.79442	0.988967	1229	1	0.41353
METAP1D	15	0.5147	0.76109	0.988905	1025	3	-0.012195	0.82486	0.90154	0.999997	1501	2	-0.012195
INO80D	15	0.51532	0.76148	0.988905	1026	2	0.43507	0.11153	0.28825	0.965334	311	5	0.43507
NonTargeting_Human_0922	1	0.51547	0.5151	0.988905	1027	0	0.030066	0.48453	0.48432	0.965334	1001	0	0.030066
NonTargeting_Human_0018	1	0.51662	0.51621	0.988905	1028	0	0.022155	0.48338	0.48303	0.965334	1000	0	0.022155
NonTargeting_Human_0001	1	0.51695	0.51648	0.988905	1029	0	0.019413	0.48305	0.48272	0.965334	999	0	0.019413
NonTargeting_Human_0308	1	0.51736	0.51688	0.988905	1030	0	0.026666	0.48264	0.48231	0.965334	998	0	0.026666
HNRNPA2B1	15	0.51838	0.76352	0.988905	1031	3	-0.10747	0.22464	0.45155	0.965334	543	3	-0.10747
RPP38	15	0.51843	0.76353	0.988905	1032	3	0.39616	0.053664	0.17404	0.963532	191	2	0.39616
NonTargeting_Human_0129	1	0.51901	0.5185	0.988905	1033	0	0.045767	0.48099	0.4806	0.965334	997	0	0.045767
NonTargeting_Human_0158	1	0.52017	0.51969	0.988905	1034	0	0.027644	0.47983	0.47961	0.965334	996	0	0.027644
NonTargeting_Human_0569	1	0.52041	0.51993	0.988905	1035	0	0.045961	0.47959	0.47933	0.965334	995	0	0.045961
CDC23	14	0.52045	0.76364	0.988905	1036	3	1.1456	0.0010029	0.0059446	0.549244	18	8	1.1456
SEC13	15	0.52046	0.76505	0.988905	1037	3	0.2292	0.34289	0.58901	0.965334	774	2	0.2292
PQBP1	15	0.5208	0.7653	0.988905	1038	3	-0.26092	0.74382	0.85234	0.996179	1400	2	-0.26092
NonTargeting_Human_0427	1	0.52091	0.52045	0.988905	1039	0	0.037921	0.47909	0.47887	0.965334	994	0	0.037921
NonTargeting_Human_0684	1	0.52099	0.52054	0.988905	1040	0	0.025236	0.47901	0.47873	0.965334	993	0	0.025236
ZW10	15	0.52126	0.7657	0.988905	1041	3	0.16708	0.70216	0.83035	0.994766	1339	1	0.16708
NonTargeting_Human_0583	1	0.52157	0.5212	0.988905	1042	0	0.051126	0.47843	0.47822	0.965334	991	0	0.051126
NonTargeting_Human_0567	1	0.5233	0.52307	0.988905	1043	0	0.031194	0.4767	0.47656	0.965334	990	0	0.031194
WDR61	15	0.52332	0.76722	0.988905	1044	4	-0.064697	0.54763	0.74437	0.982877	1104	1	-0.064697
NonTargeting_Human_0723	1	0.52363	0.52346	0.988905	1045	0	0.048413	0.47637	0.47617	0.965334	989	0	0.048413
NonTargeting_Human_0374	1	0.52396	0.52379	0.988905	1046	0	0.031707	0.47604	0.47583	0.965334	988	0	0.031707
NonTargeting_Human_0739	1	0.52404	0.52386	0.988905	1047	0	0.064939	0.47596	0.47573	0.965334	987	0	0.064939
NonTargeting_Human_0860	1	0.5247	0.52448	0.988905	1048	0	0.047008	0.4753	0.47516	0.965334	986	0	0.047008
ATP5F1	15	0.52616	0.76933	0.988905	1049	2	-0.18092	0.30997	0.55149	0.965334	695	3	-0.18092
NonTargeting_Human_0261	1	0.52784	0.52726	0.988905	1050	0	0.039882	0.47216	0.47199	0.965334	985	0	0.039882
NonTargeting_Human_0256	1	0.52817	0.52757	0.988905	1051	0	0.040948	0.47183	0.47165	0.965334	984	0	0.040948
NonTargeting_Human_0372	1	0.52841	0.52776	0.988905	1052	0	0.041193	0.47159	0.47142	0.965334	983	0	0.041193
NonTargeting_Human_0941	1	0.52899	0.52843	0.988905	1053	0	0.077472	0.47101	0.47079	0.965334	982	0	0.077472
AGPAT6	15	0.52902	0.77135	0.988905	1054	2	0.27728	0.21471	0.43955	0.965334	523	4	0.27728
NonTargeting_Human_0124	1	0.52936	0.52888	0.988905	1055	0	0.055257	0.47064	0.47036	0.965334	981	0	0.055257
NonTargeting_Human_0648	1	0.52998	0.52948	0.988905	1056	0	0.050371	0.47002	0.46979	0.965334	980	0	0.050371
PPM1A	15	0.53143	0.77314	0.988905	1057	2	0.10097	0.0080118	0.038117	0.902682	58	4	0.10097
NonTargeting_Human_0091	1	0.53188	0.53131	0.988905	1058	0	0.044914	0.46812	0.46782	0.965334	978	0	0.044914
NonTargeting_Human_0977	1	0.53312	0.53241	0.988905	1059	0	0.068234	0.46688	0.46661	0.965334	977	0	0.068234
NonTargeting_Human_0328	1	0.53336	0.53262	0.988905	1060	0	0.061009	0.46664	0.46642	0.965334	976	0	0.061009
NonTargeting_Human_0553	1	0.53369	0.53291	0.988905	1061	0	0.065251	0.46631	0.4661	0.965334	974	0	0.065251
NonTargeting_Human_0965	1	0.53378	0.53301	0.988905	1062	0	0.076829	0.46622	0.46601	0.965334	973	0	0.076829
KLHDC7B	15	0.5338	0.77491	0.988905	1063	4	0.13491	0.36686	0.60769	0.965334	807	3	0.13491
NonTargeting_Human_0621	1	0.53394	0.53316	0.988905	1064	0	0.090378	0.46606	0.46589	0.965334	972	0	0.090378
NonTargeting_Human_0572	1	0.53402	0.53326	0.988905	1065	0	0.058787	0.46598	0.46583	0.965334	971	0	0.058787
ZFAND1	15	0.53499	0.77592	0.988905	1066	4	-0.29712	0.28354	0.52078	0.965334	650	3	-0.29712
HTRA2	15	0.53509	0.77599	0.988905	1067	3	0.50008	0.028818	0.1068	0.948682	122	5	0.50008
GINS2	15	0.53549	0.77631	0.988905	1068	2	0.67735	0.012196	0.053881	0.934298	76	7	0.67735
NonTargeting_Human_0803	1	0.53559	0.53479	0.988905	1069	0	0.074235	0.46441	0.46441	0.965334	970	0	0.074235
MED9	15	0.5369	0.77725	0.988905	1070	3	0.069166	0.088874	0.24586	0.965334	264	5	0.069166
NonTargeting_Human_0794	1	0.53699	0.53624	0.988905	1071	0	0.11205	0.46301	0.46294	0.965334	967	0	0.11205
HDAC6	15	0.53749	0.77767	0.988905	1072	1	-0.16602	0.9862	0.98624	0.999997	1714	0	-0.16602
NonTargeting_Human_0630	1	0.53872	0.5379	0.988905	1073	0	0.052681	0.46128	0.46088	0.965334	966	0	0.052681
NonTargeting_Human_0726	1	0.53905	0.53822	0.988905	1074	0	0.060609	0.46095	0.46064	0.965334	965	0	0.060609
NonTargeting_Human_0197	1	0.53914	0.53831	0.988905	1075	0	0.071279	0.46086	0.46053	0.965334	964	0	0.071279
NonTargeting_Human_0758	1	0.53963	0.53881	0.988905	1076	0	0.10055	0.46037	0.46012	0.965334	962	0	0.10055
MLLT11	15	0.53992	0.77943	0.988905	1077	2	0.034733	0.85703	0.91115	0.999997	1539	1	0.034733
NonTargeting_Human_0137	1	0.54021	0.53954	0.988905	1078	0	0.064823	0.45979	0.45953	0.965334	961	0	0.064823
NonTargeting_Human_0990	1	0.54145	0.54076	0.988905	1079	0	0.091893	0.45855	0.45825	0.965334	960	0	0.091893
NonTargeting_Human_0976	1	0.54153	0.54085	0.988905	1080	0	0.066691	0.45847	0.45811	0.965334	959	0	0.066691
NonTargeting_Human_0610	1	0.54186	0.54115	0.988905	1081	0	0.060381	0.45814	0.4578	0.965334	958	0	0.060381
NonTargeting_Human_0717	1	0.54194	0.54122	0.988905	1082	0	0.074043	0.45806	0.45772	0.965334	957	0	0.074043
NonTargeting_Human_0210	1	0.54235	0.54164	0.988905	1083	0	0.06573	0.45765	0.45741	0.965334	956	0	0.06573
TMEM165	15	0.54312	0.78185	0.988905	1084	2	0.11782	0.3506	0.59538	0.965334	780	3	0.11782
NonTargeting_Human_0775	1	0.54343	0.54277	0.988905	1085	0	0.067413	0.45657	0.45641	0.965334	954	0	0.067413
RALA	15	0.5445	0.78288	0.988905	1086	4	0.0069092	0.99296	0.99285	0.999997	1724	0	0.0069092
NonTargeting_Human_0519	1	0.54458	0.54396	0.988905	1087	0	0.061956	0.45542	0.45531	0.965334	953	0	0.061956
NonTargeting_Human_0517	1	0.54532	0.5448	0.988905	1088	0	0.093433	0.45468	0.45448	0.965334	952	0	0.093433
NonTargeting_Human_0172	1	0.54557	0.54511	0.988905	1089	0	0.097462	0.45443	0.4542	0.965334	951	0	0.097462
NonTargeting_Human_0296	1	0.54574	0.54528	0.988905	1090	0	0.064636	0.45426	0.45402	0.965334	950	0	0.064636
NonTargeting_Human_0659	1	0.54623	0.54585	0.988905	1091	0	0.082848	0.45377	0.45341	0.965334	949	0	0.082848
NCAPG2	15	0.54704	0.78462	0.988905	1092	2	0.36228	0.020908	0.083969	0.948682	97	5	0.36228
NonTargeting_Human_0209	1	0.54788	0.54734	0.988905	1093	0	0.086544	0.45212	0.45188	0.965334	947	0	0.086544
NonTargeting_Human_0534	1	0.54903	0.54851	0.988905	1094	0	0.07882	0.45097	0.45059	0.965334	946	0	0.07882
NonTargeting_Human_0125	1	0.54928	0.54879	0.988905	1095	0	0.066611	0.45072	0.45033	0.965334	945	0	0.066611
NonTargeting_Human_0627	1	0.55044	0.54996	0.988905	1096	0	0.090953	0.44956	0.44934	0.965334	944	0	0.090953
NonTargeting_Human_0472	1	0.55052	0.55008	0.988905	1097	0	0.13378	0.44948	0.44925	0.965334	943	0	0.13378
NonTargeting_Human_0761	1	0.55068	0.55023	0.988905	1098	0	0.095852	0.44932	0.44907	0.965334	942	0	0.095852
C16orf62	15	0.55185	0.78829	0.988905	1099	3	-0.12222	0.52653	0.72783	0.982717	1072	1	-0.12222
SERPINB5	15	0.55246	0.78874	0.988905	1100	4	-0.42283	0.14451	0.34648	0.965334	379	3	-0.42283
NonTargeting_Human_0470	1	0.55291	0.55253	0.988905	1101	0	0.072884	0.44709	0.44688	0.965334	940	0	0.072884
NonTargeting_Human_0601	1	0.55374	0.55329	0.988905	1102	0	0.11028	0.44626	0.44606	0.965334	939	0	0.11028
NonTargeting_Human_0898	1	0.55489	0.55446	0.988905	1103	0	0.14088	0.44511	0.44491	0.965334	937	0	0.14088
NonTargeting_Human_0516	1	0.55539	0.55512	0.988905	1104	0	0.11252	0.44461	0.44449	0.965334	936	0	0.11252
NonTargeting_Human_0933	1	0.55563	0.55534	0.988905	1105	0	0.091476	0.44437	0.44424	0.965334	935	0	0.091476
NonTargeting_Human_0181	1	0.55679	0.55654	0.988905	1106	0	0.089528	0.44321	0.4431	0.965334	934	0	0.089528
NonTargeting_Human_0616	1	0.55803	0.55783	0.988905	1107	0	0.18074	0.44197	0.44166	0.965334	931	0	0.18074
EEFSEC	15	0.55813	0.79311	0.988905	1108	2	0.15983	0.99585	0.99572	0.999997	1730	0	0.15983
NonTargeting_Human_0858	1	0.55869	0.55851	0.988905	1109	0	0.11265	0.44131	0.44099	0.965334	930	0	0.11265
NonTargeting_Human_0884	1	0.55918	0.55899	0.988905	1110	0	0.10039	0.44082	0.44049	0.965334	929	0	0.10039
GYG2	15	0.55929	0.79402	0.988905	1111	2	0.3015	0.0004561	0.0031125	0.418507	12	2	0.3015
NonTargeting_Human_0105	1	0.55976	0.55956	0.988905	1112	0	0.11068	0.44024	0.4399	0.965334	928	0	0.11068
NonTargeting_Human_0580	1	0.55992	0.5597	0.988905	1113	0	0.10011	0.44008	0.43974	0.965334	927	0	0.10011
NonTargeting_Human_0067	1	0.56	0.55978	0.988905	1114	0	0.10197	0.44	0.43966	0.965334	926	0	0.10197
TBC1D22A	15	0.56096	0.79528	0.988905	1115	4	0.26227	0.031818	0.11486	0.948682	135	5	0.26227
RAB23	15	0.5636	0.79728	0.988905	1116	3	0.078731	0.7338	0.84654	0.996179	1378	2	0.078731
MRPL33	15	0.56387	0.79754	0.988905	1117	1	0.53049	0.029681	0.10916	0.948682	124	2	0.53049
TSPAN11	15	0.56387	0.79754	0.988905	1118	4	-0.1723	0.52043	0.72303	0.982717	1067	2	-0.1723
NonTargeting_Human_0804	1	0.56421	0.56426	0.988905	1119	0	0.14845	0.43579	0.4356	0.965334	921	0	0.14845
NonTargeting_Human_0057	1	0.56685	0.56695	0.988905	1120	0	0.11022	0.43315	0.43284	0.965334	918	0	0.11022
STX4	15	0.56786	0.80057	0.988905	1121	2	-0.20449	0.63486	0.79888	0.988967	1249	2	-0.20449
NonTargeting_Human_0367	1	0.56933	0.56941	0.988905	1122	0	0.13411	0.43067	0.43051	0.965334	916	0	0.13411
NonTargeting_Human_0571	1	0.56982	0.57	0.988905	1123	0	0.17792	0.43018	0.42994	0.965334	915	0	0.17792
NonTargeting_Human_0886	1	0.57027	0.57041	0.988905	1124	0	0.17579	0.42973	0.42942	0.965334	914	0	0.17579
BST2	15	0.57067	0.80257	0.988905	1125	3	0.092766	0.59547	0.78231	0.988967	1186	2	0.092766
NonTargeting_Human_0563	1	0.57073	0.57085	0.988905	1126	0	0.15124	0.42927	0.429	0.965334	913	0	0.15124
NonTargeting_Human_0284	1	0.57155	0.57164	0.988905	1127	0	0.093131	0.42845	0.42818	0.965334	911	0	0.093131
NonTargeting_Human_0051	1	0.57172	0.57182	0.988905	1128	0	0.14289	0.42828	0.42802	0.965334	910	0	0.14289
NonTargeting_Human_0336	1	0.57328	0.57344	0.988905	1129	0	0.21341	0.42672	0.42657	0.965334	908	0	0.21341
NonTargeting_Human_0851	1	0.57452	0.57466	0.988905	1130	0	0.15032	0.42548	0.42535	0.965334	907	0	0.15032
NonTargeting_Human_0363	1	0.57667	0.57682	0.988905	1131	0	0.19338	0.42333	0.42332	0.965334	903	0	0.19338
NonTargeting_Human_0413	1	0.57675	0.57687	0.988905	1132	0	0.18021	0.42325	0.42322	0.965334	902	0	0.18021
NDNL2	15	0.57736	0.80735	0.988905	1133	1	0.35851	0.35105	0.5957	0.965334	781	2	0.35851
NonTargeting_Human_0258	1	0.57741	0.57761	0.988905	1134	0	0.13727	0.42259	0.42262	0.965334	901	0	0.13727
NonTargeting_Human_0415	1	0.57856	0.57884	0.988905	1135	0	0.19217	0.42144	0.42154	0.965334	899	0	0.19217
NonTargeting_Human_0201	1	0.57873	0.57905	0.988905	1136	0	0.10878	0.42127	0.42137	0.965334	898	0	0.10878
NonTargeting_Human_0106	1	0.57881	0.57914	0.988905	1137	0	0.092491	0.42119	0.42134	0.965334	897	0	0.092491
WDR13	15	0.57902	0.80856	0.988905	1138	3	-0.0027439	0.0067831	0.033376	0.902682	50	5	-0.0027439
CCL14	15	0.57927	0.8088	0.988905	1139	3	0.43151	0.03561	0.12499	0.948682	149	5	0.43151
EFCAB5	15	0.58011	0.80944	0.988905	1140	2	0.41377	0.1012	0.26905	0.965334	286	4	0.41377
NonTargeting_Human_0173	1	0.58087	0.58131	0.988905	1141	0	0.19002	0.41913	0.41937	0.965334	894	0	0.19002
RALGAPA2	15	0.5815	0.8104	0.988905	1142	3	0.050669	0.30243	0.54319	0.965334	680	3	0.050669
NonTargeting_Human_0743	1	0.58153	0.58196	0.988905	1143	0	0.11838	0.41847	0.41868	0.965334	893	0	0.11838
HIST1H2BF	15	0.58286	0.81143	0.988905	1144	3	-0.018661	0.18346	0.40178	0.965334	459	3	-0.018661
FRY	15	0.58341	0.81177	0.988905	1145	3	0.10491	0.83597	0.90566	0.999997	1512	1	0.10491
NonTargeting_Human_0771	1	0.58384	0.58425	0.988905	1146	0	0.31071	0.41616	0.41626	0.965334	892	0	0.31071
NonTargeting_Human_0991	1	0.58409	0.58443	0.988905	1147	0	0.099652	0.41591	0.416	0.965334	891	0	0.099652
NonTargeting_Human_0055	1	0.585	0.58536	0.988905	1148	0	0.19897	0.415	0.41504	0.965334	890	0	0.19897
NonTargeting_Human_0967	1	0.58574	0.58615	0.988905	1149	0	0.21943	0.41426	0.41432	0.965334	889	0	0.21943
NonTargeting_Human_0081	1	0.58623	0.58666	0.988905	1150	0	0.2639	0.41377	0.41384	0.965334	887	0	0.2639
SHC1	15	0.58635	0.81388	0.988905	1151	4	0.10133	0.49485	0.70294	0.981106	1011	3	0.10133
NonTargeting_Human_0600	1	0.58689	0.58733	0.988905	1152	0	0.13639	0.41311	0.41323	0.965334	886	0	0.13639
SLC35F5	15	0.58765	0.81481	0.988905	1153	3	-0.075294	0.35602	0.59941	0.965334	785	3	-0.075294
NonTargeting_Human_0038	1	0.58896	0.58937	0.988905	1154	0	0.18749	0.41104	0.41121	0.965334	884	0	0.18749
NonTargeting_Human_0660	1	0.59028	0.59074	0.988905	1155	0	0.17788	0.40972	0.40994	0.965334	882	0	0.17788
ZNF232	15	0.59118	0.81732	0.988905	1156	4	-0.042368	0.4279	0.65284	0.965932	909	3	-0.042368
NonTargeting_Human_0679	1	0.59143	0.59179	0.988905	1157	0	0.1531	0.40857	0.40868	0.965334	880	0	0.1531
NonTargeting_Human_0340	1	0.59151	0.59187	0.988905	1158	0	0.16561	0.40849	0.40858	0.965334	879	0	0.16561
NonTargeting_Human_0973	1	0.59209	0.59245	0.988905	1159	0	0.38014	0.40791	0.40802	0.965334	878	0	0.38014
DNAJC18	15	0.59213	0.81792	0.988905	1160	2	0.029299	0.54122	0.73934	0.982877	1096	3	0.029299
NonTargeting_Human_0776	1	0.59258	0.59303	0.988905	1161	0	0.12329	0.40742	0.40756	0.965334	877	0	0.12329
BMP15	15	0.59411	0.81888	0.988905	1162	3	0.4245	0.28181	0.51863	0.965334	648	4	0.4245
NonTargeting_Human_0061	1	0.59465	0.59503	0.988905	1163	0	0.15922	0.40535	0.40525	0.965334	875	0	0.15922
NonTargeting_Human_0120	1	0.59506	0.5954	0.988905	1164	0	0.13413	0.40494	0.40486	0.965334	874	0	0.13413
NonTargeting_Human_0077	1	0.59778	0.5982	0.988905	1165	0	0.14653	0.40222	0.40231	0.965334	870	0	0.14653
NonTargeting_Human_0715	1	0.59877	0.59913	0.988905	1166	0	0.22578	0.40123	0.4013	0.965334	868	0	0.22578
NonTargeting_Human_0052	1	0.59951	0.60002	0.988905	1167	0	0.17174	0.40049	0.40052	0.965334	866	0	0.17174
NonTargeting_Human_0096	1	0.59984	0.60034	0.988905	1168	0	0.20578	0.40016	0.40024	0.965334	865	0	0.20578
NonTargeting_Human_0460	1	0.60075	0.60139	0.988905	1169	0	0.31101	0.39925	0.39937	0.965334	862	0	0.31101
NonTargeting_Human_0022	1	0.60108	0.60169	0.988905	1170	0	0.18852	0.39892	0.39906	0.965334	861	0	0.18852
NonTargeting_Human_0857	1	0.60149	0.60215	0.988905	1171	0	0.22977	0.39851	0.39879	0.965334	860	0	0.22977
NonTargeting_Human_0801	1	0.60199	0.60264	0.988905	1172	0	0.19123	0.39801	0.39824	0.965334	859	0	0.19123
NonTargeting_Human_0512	1	0.60207	0.60269	0.988905	1173	0	0.19775	0.39793	0.39815	0.965334	858	0	0.19775
PHF3	14	0.60242	0.80915	0.988905	1174	3	0.022652	0.0056406	0.026726	0.902682	43	5	0.022652
NonTargeting_Human_0310	1	0.60298	0.6037	0.988905	1175	0	0.26248	0.39702	0.39717	0.965334	857	0	0.26248
NonTargeting_Human_0657	1	0.60314	0.60388	0.988905	1176	0	0.21995	0.39686	0.39703	0.965334	856	0	0.21995
NonTargeting_Human_0357	1	0.6043	0.60506	0.988905	1177	0	0.15097	0.3957	0.39593	0.965334	854	0	0.15097
NonTargeting_Human_0223	1	0.60471	0.60561	0.988905	1178	0	0.19982	0.39529	0.39558	0.965334	853	0	0.19982
ZNF764	15	0.60526	0.82388	0.988905	1179	1	0.42704	0.083987	0.23654	0.965334	253	5	0.42704
NonTargeting_Human_0866	1	0.60529	0.60606	0.988905	1180	0	0.4222	0.39471	0.39498	0.965334	852	0	0.4222
NonTargeting_Human_0417	1	0.60545	0.60621	0.988905	1181	0	0.25505	0.39455	0.39485	0.965334	850	0	0.25505
ATP13A1	15	0.60713	0.82458	0.988905	1182	3	-0.049244	0.72741	0.84316	0.996179	1368	2	-0.049244
NonTargeting_Human_0168	1	0.60817	0.60894	0.988905	1183	0	0.26259	0.39183	0.39222	0.965334	848	0	0.26259
NonTargeting_Human_0387	1	0.60958	0.6103	0.988905	1184	0	0.22921	0.39042	0.39075	0.965334	847	0	0.22921
MRPS16	15	0.60989	0.82582	0.988905	1185	3	0.080215	0.47884	0.69072	0.976056	992	2	0.080215
NonTargeting_Human_0609	1	0.61073	0.61134	0.988905	1186	0	0.17975	0.38927	0.38965	0.965334	846	0	0.17975
NonTargeting_Human_0299	1	0.6109	0.61149	0.988905	1187	0	0.34725	0.3891	0.38949	0.965334	843	0	0.34725
NonTargeting_Human_0351	1	0.6118	0.61233	0.988905	1188	0	0.19274	0.3882	0.38859	0.965334	842	0	0.19274
NonTargeting_Human_0752	1	0.61312	0.61372	0.988905	1189	0	0.19308	0.38688	0.38719	0.965334	840	0	0.19308
NonTargeting_Human_0184	1	0.61345	0.61403	0.988905	1190	0	0.35926	0.38655	0.38682	0.965334	839	0	0.35926
NonTargeting_Human_0825	1	0.61387	0.61453	0.988905	1191	0	0.25965	0.38613	0.38641	0.965334	837	0	0.25965
NonTargeting_Human_0082	1	0.61485	0.61555	0.988905	1192	0	0.17211	0.38515	0.38545	0.965334	836	0	0.17211
NonTargeting_Human_0378	1	0.61584	0.61665	0.988905	1193	0	0.27524	0.38416	0.38444	0.965334	835	0	0.27524
NonTargeting_Human_0505	1	0.61815	0.61879	0.988905	1194	0	0.26446	0.38185	0.38215	0.965334	832	0	0.26446
RBM14	15	0.61841	0.83	0.988905	1195	3	0.31454	0.11798	0.29999	0.965334	327	5	0.31454
NonTargeting_Human_0589	1	0.6189	0.61955	0.988905	1196	0	0.27765	0.3811	0.38134	0.965334	830	0	0.27765
GREB1L	15	0.61906	0.83032	0.988905	1197	1	0.28738	0.048931	0.16148	0.963532	174	6	0.28738
NonTargeting_Human_0985	1	0.61947	0.62004	0.988905	1198	0	0.30018	0.38053	0.38064	0.965334	827	0	0.30018
NonTargeting_Human_0206	1	0.62022	0.6208	0.988905	1199	0	0.30734	0.37978	0.37991	0.965334	826	0	0.30734
IRS2	15	0.62085	0.8311	0.988905	1200	2	0.43193	0.10023	0.26726	0.965334	283	5	0.43193
ARHGEF35	15	0.62156	0.83137	0.988905	1201	2	-0.14582	0.24916	0.4805	0.965334	581	2	-0.14582
NonTargeting_Human_0255	1	0.62178	0.62251	0.988905	1202	0	0.21048	0.37822	0.37821	0.965334	822	0	0.21048
UBE2G2	15	0.62263	0.8318	0.988905	1203	3	0.061381	0.075747	0.22041	0.965334	231	2	0.061381
NonTargeting_Human_0612	1	0.6231	0.62379	0.988905	1204	0	0.32378	0.3769	0.37694	0.965334	821	0	0.32378
NonTargeting_Human_0246	1	0.62343	0.62421	0.988905	1205	0	0.2803	0.37657	0.37659	0.965334	820	0	0.2803
NonTargeting_Human_0704	1	0.62368	0.62444	0.988905	1206	0	0.16963	0.37632	0.37638	0.965334	819	0	0.16963
NonTargeting_Human_0476	1	0.62405	0.62489	0.988905	1207	0	0.33761	0.37595	0.37604	0.965334	818	0	0.33761
NonTargeting_Human_0816	1	0.62492	0.62575	0.988905	1208	0	0.17896	0.37508	0.37511	0.965334	817	0	0.17896
SLC4A1AP	15	0.62505	0.83281	0.988905	1209	2	0.27016	0.052749	0.17164	0.963532	188	5	0.27016
DCAF4	15	0.62509	0.83282	0.988905	1210	2	0.16372	0.010465	0.047259	0.934298	68	4	0.16372
NonTargeting_Human_0334	1	0.62516	0.62601	0.988905	1211	0	0.22463	0.37484	0.37488	0.965334	816	0	0.22463
NonTargeting_Human_0466	1	0.62624	0.62716	0.988905	1212	0	0.32436	0.37376	0.37378	0.965334	815	0	0.32436
NonTargeting_Human_0720	1	0.62789	0.62889	0.988905	1213	0	0.27119	0.37211	0.37207	0.965334	813	0	0.27119
NonTargeting_Human_0913	1	0.62879	0.6298	0.988905	1214	0	0.26168	0.37121	0.37107	0.965334	812	0	0.26168
NonTargeting_Human_0204	1	0.63152	0.6327	0.988905	1215	0	0.26511	0.36848	0.36844	0.965334	809	0	0.26511
NonTargeting_Human_0748	1	0.63424	0.63542	0.988905	1216	0	0.29924	0.36576	0.36565	0.965334	805	0	0.29924
RAB7A	15	0.63451	0.83699	0.988905	1217	3	0.44531	0.029126	0.10759	0.948682	123	6	0.44531
NonTargeting_Human_0332	1	0.63482	0.63596	0.988905	1218	0	0.29465	0.36518	0.365	0.965334	802	0	0.29465
NonTargeting_Human_0420	1	0.63548	0.63672	0.988905	1219	0	0.30415	0.36452	0.36434	0.965334	801	0	0.30415
NonTargeting_Human_0826	1	0.63605	0.63725	0.988905	1220	0	0.24215	0.36395	0.36378	0.965334	800	0	0.24215
NonTargeting_Human_0551	1	0.63968	0.641	0.988905	1221	0	0.18886	0.36032	0.36021	0.965334	797	0	0.18886
NonTargeting_Human_0780	1	0.64174	0.64302	0.988905	1222	0	0.45854	0.35826	0.35819	0.965334	795	0	0.45854
NonTargeting_Human_0474	1	0.64183	0.64311	0.988905	1223	0	0.29441	0.35817	0.35808	0.965334	794	0	0.29441
NonTargeting_Human_0490	1	0.64273	0.64402	0.988905	1224	0	0.28964	0.35727	0.35724	0.965334	791	0	0.28964
NonTargeting_Human_0540	1	0.64282	0.64409	0.988905	1225	0	0.25024	0.35718	0.35718	0.965334	790	0	0.25024
MTHFD1	15	0.64305	0.84097	0.988905	1226	3	0.084813	0.013142	0.057523	0.94858	78	7	0.084813
NonTargeting_Human_0765	1	0.64306	0.64432	0.988905	1227	0	0.23593	0.35694	0.35695	0.965334	789	0	0.23593
NonTargeting_Human_0422	1	0.64339	0.64472	0.988905	1228	0	0.2269	0.35661	0.35656	0.965334	787	0	0.2269
SOCS1	15	0.64437	0.84158	0.988905	1229	1	0.38631	0.028638	0.10615	0.948682	119	6	0.38631
PPAT	15	0.64567	0.84213	0.988905	1230	3	0.041485	0.29208	0.5309	0.965334	662	3	0.041485
NonTargeting_Human_0578	1	0.64628	0.64773	0.988905	1231	0	0.45459	0.35372	0.3538	0.965334	782	0	0.45459
hsa-mir-1908	15	0.64906	0.84358	0.988905	1232	2	-0.069209	0.40941	0.63921	0.965334	881	3	-0.069209
CEBPA	15	0.64914	0.84359	0.988905	1233	3	0.080775	0.0098222	0.044982	0.934298	65	3	0.080775
COPS8	15	0.64952	0.84375	0.988905	1234	1	0.42017	0.046031	0.15389	0.963532	167	6	0.42017
NonTargeting_Human_0807	1	0.64991	0.65137	0.988905	1235	0	0.43634	0.35009	0.35012	0.965334	779	0	0.43634
EGFR	15	0.65058	0.84411	0.988905	1236	3	-0.18729	0.99981	0.99978	0.999997	1742	0	-0.18729
COPS3	15	0.65092	0.84424	0.988905	1237	2	0.055604	0.67032	0.81491	0.989313	1299	2	0.055604
FZD6	15	0.65259	0.84513	0.988905	1238	3	0.15693	0.076366	0.22173	0.965334	233	5	0.15693
SLC35A2	15	0.6546	0.84614	0.988905	1239	3	0.1585	0.010426	0.047117	0.934298	67	6	0.1585
NonTargeting_Human_0527	1	0.65535	0.65676	0.988905	1240	0	0.19009	0.34465	0.34493	0.965334	777	0	0.19009
NonTargeting_Human_0212	1	0.65684	0.65828	0.988905	1241	0	0.48366	0.34316	0.34345	0.965334	776	0	0.48366
ANKRD35	15	0.65689	0.84715	0.988905	1242	3	0.1113	0.23389	0.46269	0.965334	560	3	0.1113
NonTargeting_Human_0178	1	0.657	0.65841	0.988905	1243	0	0.24205	0.343	0.34327	0.965334	775	0	0.24205
NonTargeting_Human_0397	1	0.65717	0.65854	0.988905	1244	0	0.35686	0.34283	0.34305	0.965334	773	0	0.35686
NonTargeting_Human_0006	1	0.6575	0.65887	0.988905	1245	0	0.33147	0.3425	0.34266	0.965334	771	0	0.33147
NonTargeting_Human_0278	1	0.65791	0.65925	0.988905	1246	0	0.25997	0.34209	0.34214	0.965334	768	0	0.25997
NonTargeting_Human_0899	1	0.65807	0.6594	0.988905	1247	0	0.54931	0.34193	0.34196	0.965334	766	0	0.54931
NonTargeting_Human_0126	1	0.65898	0.66015	0.988905	1248	0	0.35338	0.34102	0.34101	0.965334	764	0	0.35338
DDX27	15	0.65962	0.84845	0.988905	1249	3	0.20565	0.00073719	0.0047381	0.543626	14	5	0.20565
NonTargeting_Human_0959	1	0.66047	0.66143	0.988905	1250	0	0.30114	0.33953	0.33938	0.965334	762	0	0.30114
NonTargeting_Human_0463	1	0.66071	0.66165	0.988905	1251	0	0.35187	0.33929	0.33917	0.965334	761	0	0.35187
NonTargeting_Human_0978	1	0.66104	0.66194	0.988905	1252	0	0.55053	0.33896	0.33885	0.965334	760	0	0.55053
NonTargeting_Human_0174	1	0.66179	0.66287	0.988905	1253	0	0.27501	0.33821	0.3381	0.965334	759	0	0.27501
NonTargeting_Human_0889	1	0.66212	0.66317	0.988905	1254	0	0.50392	0.33788	0.33774	0.965334	758	0	0.50392
NonTargeting_Human_0412	1	0.66311	0.66412	0.988905	1255	0	0.27614	0.33689	0.3367	0.965334	756	0	0.27614
NonTargeting_Human_0039	1	0.66319	0.6642	0.988905	1256	0	0.31768	0.33681	0.33661	0.965334	755	0	0.31768
MED8	15	0.66366	0.8505	0.988905	1257	3	0.77154	0.0042656	0.022852	0.902682	35	5	0.77154
NonTargeting_Human_0834	1	0.66368	0.66473	0.988905	1258	0	0.37927	0.33632	0.33606	0.965334	754	0	0.37927
NonTargeting_Human_0943	1	0.66385	0.66486	0.988905	1259	0	0.41624	0.33615	0.3358	0.965334	753	0	0.41624
CACNA1A	15	0.66411	0.85069	0.988905	1260	2	-0.10695	0.9527	0.95387	0.999997	1657	1	-0.10695
NonTargeting_Human_0835	1	0.66434	0.66531	0.988905	1261	0	0.66447	0.33566	0.33531	0.965334	752	0	0.66447
HIST2H3A	15	0.66501	0.85106	0.988905	1262	2	0.62162	0.060955	0.19135	0.963532	207	5	0.62162
UBE2O	15	0.66545	0.85123	0.988905	1263	2	0.48037	0.030593	0.11162	0.948682	131	6	0.48037
NonTargeting_Human_0341	1	0.66616	0.66713	0.988905	1264	0	0.27319	0.33384	0.33337	0.965334	749	0	0.27319
NonTargeting_Human_0654	1	0.66682	0.66785	0.988905	1265	0	0.32685	0.33318	0.33264	0.965334	748	0	0.32685
NonTargeting_Human_0135	1	0.66715	0.66827	0.988905	1266	0	0.34335	0.33285	0.33231	0.965334	747	0	0.34335
NonTargeting_Human_0811	1	0.6688	0.66989	0.988905	1267	0	0.59812	0.3312	0.33064	0.965334	743	0	0.59812
NonTargeting_Human_0602	1	0.66888	0.67	0.988905	1268	0	0.29639	0.33112	0.33056	0.965334	742	0	0.29639
EPHA2	14	0.66935	0.8452	0.988905	1269	2	0.41401	0.073175	0.20897	0.965271	225	4	0.41401
NonTargeting_Human_0305	1	0.67003	0.67103	0.988905	1270	0	0.49819	0.32997	0.32949	0.965334	741	0	0.49819
NonTargeting_Human_0366	1	0.6716	0.67246	0.988905	1271	0	0.37842	0.3284	0.32786	0.965334	737	0	0.37842
BMI1	15	0.67186	0.85414	0.988905	1272	3	0.35418	0.18273	0.40081	0.965334	457	2	0.35418
NonTargeting_Human_0685	1	0.67234	0.67319	0.988905	1273	0	0.71345	0.32766	0.32719	0.965334	736	0	0.71345
NonTargeting_Human_0800	1	0.67243	0.67324	0.988905	1274	0	0.47765	0.32757	0.3271	0.965334	735	0	0.47765
NonTargeting_Human_0665	1	0.67317	0.67389	0.988905	1275	0	0.26881	0.32683	0.32625	0.965334	731	0	0.26881
CAPZA1	15	0.6741	0.85532	0.988905	1276	2	-0.028811	0.11352	0.29203	0.965334	316	4	-0.028811
NonTargeting_Human_0036	1	0.67416	0.67479	0.988905	1277	0	0.32384	0.32584	0.32532	0.965334	730	0	0.32384
NonTargeting_Human_0511	1	0.67424	0.67488	0.988905	1278	0	0.42975	0.32576	0.32521	0.965334	729	0	0.42975
NonTargeting_Human_0846	1	0.67457	0.67521	0.988905	1279	0	0.25599	0.32543	0.32493	0.965334	728	0	0.25599
NonTargeting_Human_0568	1	0.67465	0.67527	0.988905	1280	0	0.3304	0.32535	0.32484	0.965334	727	0	0.3304
NonTargeting_Human_0911	1	0.67474	0.67535	0.988905	1281	0	0.44122	0.32526	0.32475	0.965334	726	0	0.44122
NonTargeting_Human_0548	1	0.67523	0.6759	0.988905	1282	0	0.41267	0.32477	0.32424	0.965334	725	0	0.41267
NonTargeting_Human_0806	1	0.67614	0.67666	0.988905	1283	0	0.33823	0.32386	0.3234	0.965334	723	0	0.33823
NonTargeting_Human_0543	1	0.67771	0.67827	0.988905	1284	0	0.29925	0.32229	0.3218	0.965334	722	0	0.29925
NonTargeting_Human_0338	1	0.67837	0.67893	0.988905	1285	0	0.39825	0.32163	0.32113	0.965334	719	0	0.39825
NonTargeting_Human_0234	1	0.6787	0.67921	0.988905	1286	0	0.27659	0.3213	0.32084	0.965334	718	0	0.27659
NonTargeting_Human_0489	1	0.67878	0.67929	0.988905	1287	0	0.39698	0.32122	0.32073	0.965334	717	0	0.39698
NonTargeting_Human_0782	1	0.67894	0.67943	0.988905	1288	0	0.39922	0.32106	0.32061	0.965334	716	0	0.39922
NonTargeting_Human_0763	1	0.67911	0.67961	0.988905	1289	0	0.45789	0.32089	0.3204	0.965334	715	0	0.45789
TMEM18	15	0.67942	0.85767	0.988905	1290	2	0.79417	0.087291	0.2429	0.965334	259	5	0.79417
NonTargeting_Human_0118	1	0.6801	0.68073	0.988905	1291	0	0.28748	0.3199	0.31942	0.965334	714	0	0.28748
NonTargeting_Human_0156	1	0.68166	0.68226	0.988905	1292	0	0.51199	0.31834	0.31766	0.965334	711	0	0.51199
NonTargeting_Human_0014	1	0.68265	0.6832	0.988905	1293	0	0.42132	0.31735	0.3166	0.965334	709	0	0.42132
NonTargeting_Human_0802	1	0.68298	0.68353	0.988905	1294	0	0.58559	0.31702	0.31631	0.965334	707	0	0.58559
NonTargeting_Human_0760	1	0.68397	0.6847	0.988905	1295	0	0.35955	0.31603	0.31537	0.965334	705	0	0.35955
NonTargeting_Human_0605	1	0.68439	0.68511	0.988905	1296	0	0.37446	0.31561	0.31498	0.965334	704	0	0.37446
WDR18	15	0.68494	0.86013	0.988905	1297	1	0.83155	0.0097394	0.044705	0.934298	64	7	0.83155
PRDM8	15	0.68597	0.86062	0.988905	1298	3	-0.034071	0.66896	0.81434	0.989313	1296	2	-0.034071
NonTargeting_Human_0634	1	0.68604	0.68673	0.988905	1299	0	0.41362	0.31396	0.31338	0.965334	702	0	0.41362
NonTargeting_Human_0900	1	0.6876	0.68812	0.988905	1300	0	0.34176	0.3124	0.3119	0.965334	701	0	0.34176
NonTargeting_Human_0072	1	0.68876	0.68928	0.988905	1301	0	0.45856	0.31124	0.31065	0.965334	698	0	0.45856
NonTargeting_Human_0163	1	0.68884	0.68941	0.988905	1302	0	0.32575	0.31116	0.31059	0.965334	697	0	0.32575
NonTargeting_Human_0140	1	0.69008	0.6908	0.988905	1303	0	0.29673	0.30992	0.30929	0.965334	694	0	0.29673
NonTargeting_Human_0193	1	0.69173	0.69236	0.988905	1304	0	0.32205	0.30827	0.30766	0.965334	693	0	0.32205
CREB5	15	0.69243	0.86382	0.988905	1305	2	0.13761	0.74249	0.85156	0.996179	1398	2	0.13761
NonTargeting_Human_0249	1	0.69263	0.69328	0.988905	1306	0	0.36301	0.30737	0.30687	0.965334	692	0	0.36301
NonTargeting_Human_0821	1	0.69272	0.69335	0.988905	1307	0	0.3968	0.30728	0.30679	0.965334	691	0	0.3968
NonTargeting_Human_0216	1	0.69305	0.69361	0.988905	1308	0	0.56641	0.30695	0.30647	0.965334	690	0	0.56641
NonTargeting_Human_0406	1	0.69338	0.69389	0.988905	1309	0	0.36123	0.30662	0.30614	0.965334	689	0	0.36123
RNPEP	15	0.69346	0.86445	0.988905	1310	3	0.16592	0.11186	0.28884	0.965334	313	2	0.16592
RAB13	15	0.69407	0.86484	0.988905	1311	2	0.26928	0.0029517	0.016491	0.800743	30	5	0.26928
NonTargeting_Human_0167	1	0.69486	0.69521	0.988905	1312	0	0.42483	0.30514	0.30479	0.965334	688	0	0.42483
SBK1	15	0.69505	0.8653	0.988905	1313	3	-0.20237	0.96732	0.96716	0.999997	1684	0	-0.20237
NonTargeting_Human_0224	1	0.69519	0.69559	0.988905	1314	0	0.42447	0.30481	0.30445	0.965334	686	0	0.42447
NonTargeting_Human_0623	1	0.6961	0.69649	0.988905	1315	0	0.38243	0.3039	0.3036	0.965334	684	0	0.38243
NonTargeting_Human_0097	1	0.69618	0.69656	0.988905	1316	0	0.32908	0.30382	0.3035	0.965334	683	0	0.32908
NonTargeting_Human_0537	1	0.69742	0.69783	0.988905	1317	0	0.36213	0.30258	0.30239	0.965334	681	0	0.36213
NonTargeting_Human_0791	1	0.69833	0.69876	0.988905	1318	0	0.61673	0.30167	0.30155	0.965334	677	0	0.61673
RPL23A	14	0.69862	0.86175	0.988905	1319	2	0.99896	0.030092	0.10703	0.948682	126	6	0.99896
NonTargeting_Human_0202	1	0.70006	0.70049	0.988905	1320	0	0.333	0.29994	0.2998	0.965334	675	0	0.333
NonTargeting_Human_0901	1	0.70055	0.70101	0.988905	1321	0	0.57847	0.29945	0.2993	0.965334	673	0	0.57847
NonTargeting_Human_0123	1	0.70064	0.70109	0.988905	1322	0	0.26084	0.29936	0.29922	0.965334	672	0	0.26084
NonTargeting_Human_0208	1	0.70179	0.70223	0.988905	1323	0	0.49555	0.29821	0.29817	0.965334	671	0	0.49555
NonTargeting_Human_0171	1	0.70253	0.70297	0.988905	1324	0	0.38226	0.29747	0.29742	0.965334	670	0	0.38226
NonTargeting_Human_0951	1	0.7027	0.7031	0.988905	1325	0	0.47754	0.2973	0.29724	0.965334	669	0	0.47754
NonTargeting_Human_0595	1	0.70336	0.70375	0.988905	1326	0	0.31284	0.29664	0.29656	0.965334	668	0	0.31284
NonTargeting_Human_0023	1	0.70426	0.70472	0.988905	1327	0	0.34329	0.29574	0.29571	0.965334	667	0	0.34329
NonTargeting_Human_0348	1	0.70583	0.70613	0.988905	1328	0	0.38364	0.29417	0.2939	0.965334	665	0	0.38364
SPATA5	15	0.70629	0.87071	0.988905	1329	3	-0.22452	0.0065872	0.032464	0.902682	48	4	-0.22452
NonTargeting_Human_0916	1	0.70822	0.70831	0.988905	1330	0	0.53219	0.29178	0.29139	0.965334	661	0	0.53219
NonTargeting_Human_0326	1	0.70987	0.71001	0.988905	1331	0	0.34713	0.29013	0.28972	0.965334	660	0	0.34713
CHAF1B	15	0.70989	0.87251	0.988905	1332	3	0.30605	0.011686	0.051955	0.934298	75	4	0.30605
BRICD5	15	0.71015	0.87262	0.988905	1333	3	0.14117	0.17294	0.3886	0.965334	439	2	0.14117
SMOC1	15	0.71194	0.87339	0.988905	1334	3	0.057873	0.23932	0.46919	0.965334	566	3	0.057873
NonTargeting_Human_0180	1	0.71235	0.71252	0.988905	1335	0	0.32556	0.28765	0.28724	0.965334	657	0	0.32556
NonTargeting_Human_0793	1	0.71301	0.71325	0.988905	1336	0	0.42324	0.28699	0.28655	0.965334	655	0	0.42324
NonTargeting_Human_0691	1	0.71383	0.71408	0.988905	1337	0	0.43709	0.28617	0.28574	0.965334	654	0	0.43709
NonTargeting_Human_0643	1	0.71424	0.71451	0.988905	1338	0	0.93988	0.28576	0.2853	0.965334	653	0	0.93988
NonTargeting_Human_0285	1	0.71457	0.71482	0.988905	1339	0	0.97952	0.28543	0.28499	0.965334	652	0	0.97952
C1orf198	15	0.71737	0.87604	0.988905	1340	3	-0.17938	0.98337	0.98348	0.999997	1713	0	-0.17938
PRELP	15	0.71776	0.87618	0.988905	1341	3	-0.056445	0.79286	0.88036	0.999997	1465	2	-0.056445
AQP10	15	0.71813	0.87634	0.988905	1342	2	0.077542	0.91806	0.93324	0.999997	1606	1	0.077542
NonTargeting_Human_0524	1	0.71829	0.71858	0.988905	1343	0	0.47845	0.28171	0.28124	0.965334	647	0	0.47845
NonTargeting_Human_0764	1	0.71886	0.71913	0.988905	1344	0	0.26983	0.28114	0.28074	0.965334	645	0	0.26983
NonTargeting_Human_0633	1	0.71936	0.71961	0.988905	1345	0	0.5917	0.28064	0.28021	0.965334	644	0	0.5917
NonTargeting_Human_0143	1	0.72084	0.72109	0.988905	1346	0	1.2612	0.27916	0.27882	0.965334	640	0	1.2612
NonTargeting_Human_0618	1	0.72117	0.7214	0.988905	1347	0	0.5799	0.27883	0.27855	0.965334	639	0	0.5799
NonTargeting_Human_0799	1	0.72142	0.72164	0.988905	1348	0	0.55807	0.27858	0.27834	0.965334	638	0	0.55807
FBXL8	15	0.72177	0.87817	0.988905	1349	3	-0.042878	0.15931	0.37211	0.965334	416	5	-0.042878
MRPL21	15	0.72227	0.87843	0.988905	1350	1	0.19509	0.12448	0.31151	0.965334	335	3	0.19509
NonTargeting_Human_0083	1	0.72266	0.72306	0.988905	1351	0	0.36842	0.27734	0.27715	0.965334	637	0	0.36842
NonTargeting_Human_0268	1	0.7229	0.72332	0.988905	1352	0	0.63283	0.2771	0.27691	0.965334	635	0	0.63283
NonTargeting_Human_0604	1	0.72315	0.72364	0.988905	1353	0	0.51745	0.27685	0.27667	0.965334	634	0	0.51745
NonTargeting_Human_0878	1	0.72381	0.72425	0.988905	1354	0	0.52603	0.27619	0.27598	0.965334	633	0	0.52603
IREB2	14	0.72396	0.87575	0.988905	1355	2	0.066912	0.0056391	0.026721	0.902682	42	4	0.066912
NonTargeting_Human_0883	1	0.72398	0.72441	0.988905	1356	0	1.1868	0.27602	0.2758	0.965334	632	0	1.1868
TMEM30A	15	0.72525	0.88007	0.988905	1357	3	-0.2259	0.59367	0.78108	0.988967	1183	1	-0.2259
NonTargeting_Human_0316	1	0.7253	0.72587	0.988905	1358	0	0.49269	0.2747	0.27452	0.965334	630	0	0.49269
NonTargeting_Human_0371	1	0.72538	0.72591	0.988905	1359	0	0.55184	0.27462	0.27446	0.965334	629	0	0.55184
C7orf26	15	0.72636	0.88052	0.988905	1360	3	0.1873	0.43696	0.65949	0.966998	924	3	0.1873
NonTargeting_Human_0161	1	0.72802	0.72843	0.988905	1361	0	0.38901	0.27198	0.27187	0.965334	625	0	0.38901
NonTargeting_Human_0606	1	0.7281	0.72847	0.988905	1362	0	0.6247	0.2719	0.27176	0.965334	624	0	0.6247
IBA57	15	0.72857	0.88158	0.988905	1363	1	0.31209	0.33416	0.57901	0.965334	750	4	0.31209
NonTargeting_Human_0669	1	0.72868	0.72906	0.988905	1364	0	0.59165	0.27132	0.27121	0.965334	622	0	0.59165
NonTargeting_Human_0508	1	0.72876	0.72915	0.988905	1365	0	0.59369	0.27124	0.27114	0.965334	621	0	0.59369
NonTargeting_Human_0142	1	0.72975	0.73006	0.988905	1366	0	0.41207	0.27025	0.27007	0.965334	620	0	0.41207
KLHL20	15	0.73076	0.88266	0.988905	1367	3	0.0017958	0.59153	0.77939	0.988967	1180	2	0.0017958
NonTargeting_Human_0368	1	0.73214	0.73248	0.988905	1368	0	0.48408	0.26786	0.26779	0.965334	617	0	0.48408
NonTargeting_Human_0394	1	0.73223	0.73255	0.988905	1369	0	0.48988	0.26777	0.2677	0.965334	616	0	0.48988
PDHX	15	0.73242	0.88355	0.988905	1370	3	0.0075714	0.00061843	0.004098	0.511669	13	3	0.0075714
NonTargeting_Human_0115	1	0.73256	0.73283	0.988905	1371	0	0.60535	0.26744	0.2674	0.965334	615	0	0.60535
NonTargeting_Human_0549	1	0.73289	0.73312	0.988905	1372	0	0.79417	0.26711	0.26707	0.965334	613	0	0.79417
ANAPC16	15	0.73308	0.88388	0.988905	1373	3	-0.015254	0.87519	0.91705	0.999997	1555	1	-0.015254
NonTargeting_Human_0243	1	0.73396	0.73419	0.988905	1374	0	0.49279	0.26604	0.26605	0.965334	610	0	0.49279
NonTargeting_Human_0159	1	0.73429	0.73451	0.988905	1375	0	0.76749	0.26571	0.26574	0.965334	609	0	0.76749
NonTargeting_Human_0999	1	0.73462	0.73489	0.988905	1376	0	0.51744	0.26538	0.2654	0.965334	608	0	0.51744
NonTargeting_Human_0615	1	0.73495	0.7353	0.988905	1377	0	0.53294	0.26505	0.26504	0.965334	606	0	0.53294
NonTargeting_Human_0220	1	0.73651	0.73687	0.988905	1378	0	0.41976	0.26349	0.26338	0.965334	603	0	0.41976
ZBTB10	15	0.7367	0.88581	0.988905	1379	3	-0.14495	0.0077189	0.036899	0.902682	56	5	-0.14495
NonTargeting_Human_0183	1	0.73676	0.73709	0.988905	1380	0	0.35623	0.26324	0.26316	0.965334	602	0	0.35623
NonTargeting_Human_0966	1	0.73742	0.73785	0.988905	1381	0	0.55413	0.26258	0.26236	0.965334	601	0	0.55413
NonTargeting_Human_0841	1	0.73792	0.73834	0.988905	1382	0	0.55335	0.26208	0.26184	0.965334	600	0	0.55335
GPR152	15	0.73865	0.88688	0.988905	1383	2	0.16177	0.93735	0.94324	0.999997	1632	1	0.16177
NonTargeting_Human_0513	1	0.73932	0.73971	0.988905	1384	0	0.5032	0.26068	0.26044	0.965334	599	0	0.5032
NonTargeting_Human_0477	1	0.74023	0.74061	0.988905	1385	0	0.6137	0.25977	0.25961	0.965334	598	0	0.6137
NonTargeting_Human_0245	1	0.74031	0.74064	0.988905	1386	0	0.46025	0.25969	0.25955	0.965334	597	0	0.46025
ORMDL1	15	0.74141	0.88827	0.988905	1387	2	0.45566	0.12611	0.31429	0.965334	341	5	0.45566
NonTargeting_Human_0687	1	0.74262	0.74314	0.988905	1388	0	0.39154	0.25738	0.25723	0.965334	595	0	0.39154
NonTargeting_Human_0266	1	0.74336	0.74383	0.988905	1389	0	0.58275	0.25664	0.25644	0.965334	594	0	0.58275
NonTargeting_Human_0090	1	0.74427	0.74467	0.988905	1390	0	0.60517	0.25573	0.25552	0.965334	593	0	0.60517
NonTargeting_Human_0682	1	0.74468	0.74511	0.988905	1391	0	0.86818	0.25532	0.25511	0.965334	592	0	0.86818
G6PC	15	0.74479	0.89002	0.988905	1392	3	0.28336	0.030157	0.11036	0.948682	129	4	0.28336
NonTargeting_Human_0558	1	0.7455	0.74602	0.988905	1393	0	0.51916	0.2545	0.25423	0.965334	591	0	0.51916
NonTargeting_Human_0680	1	0.74616	0.74664	0.988905	1394	0	0.77716	0.25384	0.25361	0.965334	590	0	0.77716
SPSB3	15	0.7476	0.89132	0.988905	1395	3	-0.071471	0.27529	0.51083	0.965334	631	4	-0.071471
NonTargeting_Human_0019	1	0.74765	0.74816	0.988905	1396	0	0.41076	0.25235	0.25214	0.965334	589	0	0.41076
NonTargeting_Human_0093	1	0.74773	0.74823	0.988905	1397	0	0.6343	0.25227	0.25208	0.965334	588	0	0.6343
NonTargeting_Human_0017	1	0.74781	0.74825	0.988905	1398	0	0.44943	0.25219	0.25202	0.965334	587	0	0.44943
RPS14	15	0.74803	0.8916	0.988905	1399	1	0.38717	0.020012	0.081244	0.948682	90	5	0.38717
NonTargeting_Human_0177	1	0.7488	0.74913	0.988905	1400	0	0.56322	0.2512	0.25096	0.965334	586	0	0.56322
POLR2E	15	0.74939	0.89222	0.988905	1401	2	0.44769	0.027631	0.10333	0.948682	117	6	0.44769
NonTargeting_Human_0929	1	0.74946	0.74979	0.988905	1402	0	0.47744	0.25054	0.25033	0.965334	585	0	0.47744
RTBDN	15	0.74974	0.89238	0.988905	1403	1	0.39955	0.0079241	0.037755	0.902682	57	5	0.39955
NonTargeting_Human_0100	1	0.74996	0.75022	0.988905	1404	0	0.54748	0.25004	0.24983	0.965334	584	0	0.54748
NonTargeting_Human_0342	1	0.75004	0.75033	0.988905	1405	0	0.50028	0.24996	0.24976	0.965334	583	0	0.50028
hsa-mir-6511a-4	15	0.75039	0.89267	0.988905	1406	3	-0.17663	0.00020408	0.0013113	0.37553	4	4	-0.17663
SAP130	15	0.75085	0.8929	0.988905	1407	3	0.20745	0.84727	0.90846	0.999997	1525	1	0.20745
NonTargeting_Human_0664	1	0.75186	0.75219	0.988905	1408	0	0.43215	0.24814	0.24804	0.965334	580	0	0.43215
EBP	15	0.7527	0.89398	0.988905	1409	3	0.31326	0.03894	0.13435	0.948682	157	4	0.31326
NonTargeting_Human_0015	1	0.75326	0.75362	0.988905	1410	0	0.47308	0.24674	0.24668	0.965334	578	0	0.47308
NonTargeting_Human_0358	1	0.75458	0.75503	0.988905	1411	0	0.42788	0.24542	0.24541	0.965334	575	0	0.42788
RAP1GAP	15	0.75578	0.89546	0.988905	1412	2	0.004663	0.36575	0.60677	0.965334	804	2	0.004663
SAFB	15	0.75591	0.89554	0.988905	1413	3	0.0053836	0.20348	0.42609	0.965334	499	4	0.0053836
TNFRSF8	15	0.7571	0.89618	0.988905	1414	3	0.42272	0.13257	0.32547	0.965334	356	2	0.42272
GALR1	15	0.75717	0.89624	0.988905	1415	2	-0.077944	0.52739	0.72848	0.982717	1074	2	-0.077944
NonTargeting_Human_1000	1	0.75854	0.75891	0.988905	1416	0	0.624	0.24146	0.24136	0.965334	572	0	0.624
NonTargeting_Human_0080	1	0.75862	0.75903	0.988905	1417	0	0.91946	0.24138	0.2413	0.965334	571	0	0.91946
hsa-mir-1302-6	7	0.75939	0.79494	0.988905	1418	1	-0.27348	0.5254	0.60441	0.965334	1071	1	-0.27348
NonTargeting_Human_0482	1	0.75953	0.75997	0.988905	1419	0	0.63895	0.24047	0.24036	0.965334	570	0	0.63895
NonTargeting_Human_0700	1	0.75986	0.76031	0.988905	1420	0	0.56355	0.24014	0.24001	0.965334	569	0	0.56355
STX10	15	0.76136	0.89831	0.988905	1421	2	0.019629	0.59686	0.78291	0.988967	1189	1	0.019629
NonTargeting_Human_0930	1	0.76258	0.76289	0.988905	1422	0	0.44206	0.23742	0.23725	0.965334	564	0	0.44206
PES1	15	0.76298	0.89915	0.988905	1423	2	0.60604	0.033891	0.12041	0.948682	144	4	0.60604
NonTargeting_Human_0164	1	0.76406	0.76434	0.988905	1424	0	0.85106	0.23594	0.23575	0.965334	563	0	0.85106
ZBTB17	15	0.76523	0.90025	0.988905	1425	1	0.49477	0.065179	0.19979	0.963532	216	5	0.49477
WDR33	15	0.76647	0.90091	0.988905	1426	3	0.44225	0.05794	0.18497	0.963532	201	5	0.44225
CTRL	15	0.76778	0.90146	0.988905	1427	1	0.19768	0.53423	0.73371	0.982717	1085	3	0.19768
TRA2B	15	0.76841	0.90175	0.988905	1428	1	0.79596	0.0018542	0.010748	0.691192	23	7	0.79596
NonTargeting_Human_0149	1	0.76918	0.76967	0.988905	1429	0	0.49044	0.23082	0.23083	0.965334	557	0	0.49044
NonTargeting_Human_0408	1	0.77008	0.77057	0.988905	1430	0	0.76455	0.22992	0.22986	0.965334	554	0	0.76455
NonTargeting_Human_0131	1	0.77058	0.77105	0.988905	1431	0	0.52646	0.22942	0.22937	0.965334	552	0	0.52646
MPDU1	15	0.77061	0.90291	0.988905	1432	1	0.26387	0.51721	0.72061	0.982717	1061	3	0.26387
SNAI1	15	0.77238	0.90402	0.988905	1433	3	0.065418	0.30217	0.5429	0.965334	679	4	0.065418
NonTargeting_Human_0401	1	0.77322	0.77375	0.988905	1434	0	0.55378	0.22678	0.22667	0.965334	549	0	0.55378
TRIM4	15	0.77388	0.90479	0.988905	1435	3	-0.083029	0.071138	0.21141	0.965271	223	4	-0.083029
NonTargeting_Human_0942	1	0.77421	0.77466	0.988905	1436	0	0.48345	0.22579	0.2256	0.965334	546	0	0.48345
MTA2	15	0.77455	0.90509	0.988905	1437	3	-0.097815	0.0041619	0.022416	0.902682	34	3	-0.097815
NonTargeting_Human_0671	1	0.77487	0.77534	0.988905	1438	0	0.87909	0.22513	0.22488	0.965334	544	0	0.87909
NonTargeting_Human_0425	1	0.77594	0.77652	0.988905	1439	0	0.49112	0.22406	0.22369	0.965334	541	0	0.49112
NonTargeting_Human_0747	1	0.77751	0.77822	0.988905	1440	0	0.71754	0.22249	0.22214	0.965334	538	0	0.71754
TGIF1	15	0.77756	0.90685	0.988905	1441	3	0.5705	0.060345	0.19012	0.963532	205	5	0.5705
NonTargeting_Human_0686	1	0.778	0.77869	0.988905	1442	0	0.63242	0.222	0.22172	0.965334	536	0	0.63242
NonTargeting_Human_0831	1	0.7785	0.77913	0.988905	1443	0	0.74999	0.2215	0.22121	0.965334	535	0	0.74999
NonTargeting_Human_0535	1	0.78279	0.78356	0.988905	1444	0	0.75282	0.21721	0.21702	0.965271	532	0	0.75282
KIAA1033	15	0.78285	0.90974	0.988905	1445	3	0.14263	0.052637	0.17133	0.963532	187	5	0.14263
NonTargeting_Human_0233	1	0.78295	0.78368	0.988905	1446	0	0.70327	0.21705	0.21684	0.965271	531	0	0.70327
VPS13C	15	0.78312	0.90992	0.988905	1447	2	0.31991	0.27146	0.50653	0.965334	623	4	0.31991
NonTargeting_Human_0732	1	0.78345	0.78416	0.988905	1448	0	1.0183	0.21655	0.21629	0.965271	530	0	1.0183
PIM2	15	0.78369	0.9102	0.988905	1449	3	-0.045156	0.70133	0.82978	0.994766	1338	2	-0.045156
NonTargeting_Human_0592	1	0.78435	0.78507	0.988905	1450	0	0.49555	0.21565	0.21542	0.965271	527	0	0.49555
NonTargeting_Human_0370	1	0.78452	0.78523	0.988905	1451	0	0.47844	0.21548	0.21523	0.965271	526	0	0.47844
NonTargeting_Human_0089	1	0.78493	0.78562	0.988905	1452	0	0.4383	0.21507	0.21474	0.965271	525	0	0.4383
NonTargeting_Human_0896	1	0.78518	0.78585	0.988905	1453	0	0.61207	0.21482	0.21457	0.965271	524	0	0.61207
PGM3	15	0.78578	0.91121	0.988905	1454	1	0.72458	0.021404	0.085356	0.948682	99	6	0.72458
C1GALT1	15	0.78599	0.91127	0.988905	1455	3	0.25431	0.13727	0.33346	0.965334	370	4	0.25431
NonTargeting_Human_0711	1	0.78708	0.78777	0.988905	1456	0	0.67386	0.21292	0.21256	0.965271	521	0	0.67386
NonTargeting_Human_0046	1	0.78716	0.78783	0.988905	1457	0	0.84385	0.21284	0.21245	0.965271	520	0	0.84385
NSUN3	15	0.78723	0.91196	0.988905	1458	3	0.32238	0.29976	0.53986	0.965334	674	4	0.32238
NonTargeting_Human_0934	1	0.78774	0.78846	0.988905	1459	0	0.8854	0.21226	0.21191	0.965271	519	0	0.8854
PGAP3	15	0.78783	0.91226	0.988905	1460	2	0.44522	0.58023	0.77036	0.988967	1157	3	0.44522
FRG2C	15	0.7883	0.91249	0.988905	1461	2	0.6046	0.050417	0.16535	0.963532	176	6	0.6046
NonTargeting_Human_0769	1	0.78864	0.78924	0.988905	1462	0	0.64048	0.21136	0.21098	0.965271	517	0	0.64048
NonTargeting_Human_0728	1	0.78971	0.79022	0.988905	1463	0	0.52932	0.21029	0.20993	0.965271	515	0	0.52932
NonTargeting_Human_0450	1	0.79029	0.7908	0.988905	1464	0	0.49241	0.20971	0.20944	0.965271	514	0	0.49241
SIN3B	15	0.79053	0.91375	0.988905	1465	3	0.22964	0.33517	0.58022	0.965334	751	3	0.22964
ABHD14B	15	0.79176	0.91444	0.988905	1466	3	0.15438	0.078312	0.22542	0.965334	236	5	0.15438
NonTargeting_Human_0454	1	0.79235	0.7928	0.988905	1467	0	0.95486	0.20765	0.20756	0.965271	510	0	0.95486
NonTargeting_Human_0345	1	0.7926	0.79303	0.988905	1468	0	0.81112	0.2074	0.20723	0.965271	509	0	0.81112
SEZ6L2	15	0.79272	0.91489	0.988905	1469	1	0.30652	0.036798	0.12823	0.948682	151	5	0.30652
MRPL9	15	0.79358	0.91541	0.988905	1470	3	0.23541	0.19495	0.41578	0.965334	482	4	0.23541
NonTargeting_Human_0190	1	0.794	0.79445	0.988905	1471	0	0.60236	0.206	0.20576	0.964258	508	0	0.60236
NonTargeting_Human_0130	1	0.79425	0.79476	0.988905	1472	0	0.73263	0.20575	0.20556	0.964258	507	0	0.73263
MORC3	15	0.79444	0.91588	0.988905	1473	2	-0.035961	0.96598	0.96577	0.999997	1679	0	-0.035961
ALG8	15	0.795	0.9162	0.988905	1474	3	0.095992	0.28165	0.51841	0.965334	646	4	0.095992
GOLGA6A	15	0.7952	0.91634	0.988905	1475	3	0.31917	0.031693	0.11449	0.948682	134	4	0.31917
MBOAT7	15	0.79534	0.91643	0.988905	1476	2	0.52898	0.0043845	0.023413	0.902682	36	6	0.52898
NonTargeting_Human_0344	1	0.79541	0.79602	0.988905	1477	0	0.60801	0.20459	0.2045	0.963532	505	0	0.60801
NonTargeting_Human_0153	1	0.79549	0.79613	0.988905	1478	0	0.52823	0.20451	0.20445	0.963532	504	0	0.52823
NonTargeting_Human_0231	1	0.79557	0.79622	0.988905	1479	0	0.42992	0.20443	0.20433	0.963532	503	0	0.42992
DOCK5	15	0.7956	0.91656	0.988905	1480	3	0.11166	0.74329	0.852	0.996179	1399	2	0.11166
NonTargeting_Human_0429	1	0.79565	0.79631	0.988905	1481	0	0.52639	0.20435	0.20422	0.963532	502	0	0.52639
NonTargeting_Human_0439	1	0.79598	0.79659	0.988905	1482	0	0.33528	0.20402	0.20382	0.963532	501	0	0.33528
NonTargeting_Human_0145	1	0.7964	0.79696	0.988905	1483	0	0.92383	0.2036	0.2034	0.963532	500	0	0.92383
NonTargeting_Human_0478	1	0.79763	0.79825	0.988905	1484	0	0.62103	0.20237	0.20211	0.963532	496	0	0.62103
NonTargeting_Human_0560	1	0.79805	0.79864	0.988905	1485	0	1.0392	0.20195	0.20169	0.963532	495	0	1.0392
NonTargeting_Human_0924	1	0.79871	0.79924	0.988905	1486	0	0.89148	0.20129	0.20109	0.963532	494	0	0.89148
CHRND	15	0.7989	0.91838	0.988905	1487	2	0.1246	0.74701	0.85398	0.996179	1404	2	0.1246
NonTargeting_Human_0198	1	0.79994	0.80056	0.988905	1488	0	0.53953	0.20006	0.19978	0.963532	493	0	0.53953
NonTargeting_Human_0084	1	0.80068	0.80129	0.988905	1489	0	0.72989	0.19932	0.19899	0.963532	492	0	0.72989
NonTargeting_Human_0529	1	0.80225	0.80285	0.988905	1490	0	0.52573	0.19775	0.19742	0.963532	491	1	0.52573
NonTargeting_Human_0079	1	0.80275	0.80325	0.988905	1491	0	0.66866	0.19725	0.1969	0.963532	487	1	0.66866
NonTargeting_Human_0839	1	0.80308	0.8035	0.988905	1492	0	0.81558	0.19692	0.19659	0.963532	486	1	0.81558
NonTargeting_Human_0863	1	0.80316	0.80363	0.988905	1493	0	0.83663	0.19684	0.19652	0.963532	485	1	0.83663
SLC38A5	15	0.80437	0.92081	0.988905	1494	2	0.43162	0.12875	0.31873	0.965334	348	5	0.43162
NonTargeting_Human_0269	1	0.80456	0.80508	0.988905	1495	0	0.42594	0.19544	0.19507	0.963532	484	1	0.42594
NonTargeting_Human_0587	1	0.80497	0.80552	0.988905	1496	0	0.50482	0.19503	0.1947	0.963532	483	1	0.50482
NonTargeting_Human_0495	1	0.80514	0.80565	0.988905	1497	0	0.64953	0.19486	0.19453	0.963532	481	1	0.64953
NonTargeting_Human_0784	1	0.80555	0.80606	0.988905	1498	0	0.76727	0.19445	0.19417	0.963532	480	1	0.76727
NonTargeting_Human_0805	1	0.80596	0.80642	0.988905	1499	0	0.55679	0.19404	0.19381	0.963532	478	1	0.55679
DNLZ	15	0.80678	0.92158	0.988905	1500	2	0.16289	0.43594	0.65881	0.966998	922	2	0.16289
DNAJC4	15	0.80704	0.92163	0.988905	1501	2	0.50202	0.18016	0.39762	0.965334	453	3	0.50202
NonTargeting_Human_0528	1	0.80786	0.80809	0.988905	1502	0	0.66463	0.19214	0.19197	0.963532	477	1	0.66463
NonTargeting_Human_0820	1	0.80819	0.80838	0.988905	1503	0	0.72028	0.19181	0.19161	0.963532	476	1	0.72028
NonTargeting_Human_0235	1	0.8091	0.80912	0.988905	1504	0	0.50321	0.1909	0.19064	0.963532	475	1	0.50321
NonTargeting_Human_0402	1	0.80926	0.80932	0.988905	1505	0	0.76482	0.19074	0.1905	0.963532	473	1	0.76482
ST6GAL1	15	0.8095	0.92233	0.988905	1506	2	0.18825	0.4637	0.67943	0.971876	968	2	0.18825
NonTargeting_Human_0946	1	0.80992	0.81004	0.988905	1507	0	1.097	0.19008	0.1898	0.963532	471	1	1.097
NonTargeting_Human_0030	1	0.81017	0.81021	0.988905	1508	0	0.73406	0.18983	0.18962	0.963532	470	1	0.73406
NonTargeting_Human_0960	1	0.81149	0.81149	0.988905	1509	0	1.1427	0.18851	0.18841	0.963532	468	1	1.1427
NonTargeting_Human_0830	1	0.81157	0.8116	0.988905	1510	0	0.94816	0.18843	0.18834	0.963532	467	1	0.94816
NonTargeting_Human_0353	1	0.81223	0.8122	0.988905	1511	0	1.1824	0.18777	0.18766	0.963532	466	1	1.1824
NonTargeting_Human_0629	1	0.81281	0.81279	0.988905	1512	0	0.69317	0.18719	0.18702	0.963532	465	1	0.69317
NonTargeting_Human_0905	1	0.81297	0.81295	0.988905	1513	0	0.81796	0.18703	0.18684	0.963532	464	1	0.81796
ZNF22	15	0.8136	0.9235	0.988905	1514	2	0.37838	0.57448	0.76591	0.988049	1145	3	0.37838
NonTargeting_Human_0995	1	0.81388	0.81391	0.988905	1515	0	1.0159	0.18612	0.18587	0.963532	462	1	1.0159
NonTargeting_Human_0814	1	0.81512	0.81498	0.988905	1516	0	0.838	0.18488	0.18457	0.963532	461	1	0.838
NonTargeting_Human_0114	1	0.8166	0.81651	0.988905	1517	0	1.2977	0.1834	0.18327	0.963532	458	1	1.2977
NonTargeting_Human_0263	1	0.81768	0.81755	0.988905	1518	0	0.64511	0.18232	0.18225	0.963532	456	1	0.64511
NonTargeting_Human_0872	1	0.81801	0.81791	0.988905	1519	0	0.6064	0.18199	0.18197	0.963532	455	1	0.6064
COMMD2	15	0.81884	0.92513	0.988905	1520	2	-0.16175	0.95411	0.95485	0.999997	1662	1	-0.16175
NonTargeting_Human_0577	1	0.81999	0.81968	0.988905	1521	0	1.3361	0.18001	0.17997	0.963532	452	1	1.3361
NonTargeting_Human_0584	1	0.82023	0.82	0.988905	1522	0	1.2499	0.17977	0.1798	0.963532	451	1	1.2499
NonTargeting_Human_0383	1	0.82048	0.82023	0.988905	1523	0	0.71602	0.17952	0.17954	0.963532	450	1	0.71602
NonTargeting_Human_0200	1	0.82122	0.82101	0.988905	1524	0	0.72442	0.17878	0.17889	0.963532	447	1	0.72442
CORO1A	15	0.82327	0.92643	0.988905	1525	2	0.18006	0.92135	0.93473	0.999997	1610	1	0.18006
MRP63	15	0.82463	0.92683	0.988905	1526	2	0.30004	0.026326	0.099585	0.948682	113	5	0.30004
MLLT1	15	0.82604	0.9273	0.988905	1527	2	0.20175	0.080982	0.2309	0.965334	247	4	0.20175
POLR3C	14	0.82734	0.91996	0.988905	1528	1	-0.0017093	0.27	0.50265	0.965334	619	4	-0.0017093
NonTargeting_Human_0264	1	0.82823	0.82805	0.988905	1529	0	1.0101	0.17177	0.17215	0.963532	437	1	1.0101
NonTargeting_Human_0275	1	0.82914	0.82888	0.988905	1530	0	1.6135	0.17086	0.17117	0.963532	435	1	1.6135
GTF3A	15	0.82936	0.92823	0.988905	1531	2	0.48915	0.028818	0.1068	0.948682	121	5	0.48915
NonTargeting_Human_0352	1	0.82939	0.82917	0.988905	1532	0	0.6808	0.17061	0.17095	0.963532	434	1	0.6808
KCNK12	15	0.83086	0.92871	0.988905	1533	2	0.04893	0.37914	0.61641	0.965334	825	3	0.04893
NonTargeting_Human_0445	1	0.83199	0.83174	0.988905	1534	0	2.6909	0.16801	0.16843	0.963532	432	1	2.6909
NonTargeting_Human_0575	1	0.83293	0.83265	0.988905	1535	0	0.74559	0.16707	0.16743	0.963532	430	1	0.74559
NonTargeting_Human_0876	1	0.83384	0.83353	0.988905	1536	0	1.2437	0.16616	0.16669	0.963532	428	1	1.2437
AXIN1	15	0.8339	0.92964	0.988905	1537	1	0.04658	0.38131	0.61797	0.965334	831	3	0.04658
NonTargeting_Human_0104	1	0.83392	0.83359	0.988905	1538	0	0.63343	0.16608	0.16661	0.963532	427	1	0.63343
NonTargeting_Human_0598	1	0.83401	0.83365	0.988905	1539	0	0.91457	0.16599	0.16652	0.963532	426	1	0.91457
NonTargeting_Human_0298	1	0.83425	0.83396	0.988905	1540	0	0.85816	0.16575	0.16627	0.963532	425	1	0.85816
NonTargeting_Human_0392	1	0.8345	0.83431	0.988905	1541	0	0.65797	0.1655	0.16598	0.963532	424	1	0.65797
NonTargeting_Human_0455	1	0.83458	0.8344	0.988905	1542	0	1.1863	0.16542	0.16587	0.963532	423	1	1.1863
NonTargeting_Human_0486	1	0.83615	0.83591	0.988905	1543	0	0.98822	0.16385	0.16432	0.963532	422	1	0.98822
NonTargeting_Human_0554	1	0.83846	0.83835	0.988905	1544	0	1.2732	0.16154	0.1621	0.963532	420	1	1.2732
DROSHA	15	0.83915	0.93129	0.988905	1545	2	0.67841	0.00095452	0.00597	0.549244	16	6	0.67841
NonTargeting_Human_0703	1	0.83937	0.83926	0.988905	1546	0	1.2452	0.16063	0.16119	0.963532	419	1	1.2452
NonTargeting_Human_0904	1	0.83945	0.83933	0.988905	1547	0	0.86467	0.16055	0.1611	0.963532	418	1	0.86467
NonTargeting_Human_0440	1	0.84036	0.84033	0.988905	1548	0	1.6236	0.15964	0.16021	0.963532	417	1	1.6236
NonTargeting_Human_0365	1	0.8416	0.84158	0.988905	1549	0	0.77428	0.1584	0.15904	0.963532	415	1	0.77428
NonTargeting_Human_0215	1	0.84176	0.84177	0.988905	1550	0	1.5705	0.15824	0.15885	0.963532	414	1	1.5705
NonTargeting_Human_0035	1	0.84217	0.8423	0.988905	1551	0	0.89719	0.15783	0.15841	0.963532	412	1	0.89719
NonTargeting_Human_0021	1	0.84316	0.84329	0.988905	1552	0	0.64797	0.15684	0.15732	0.963532	411	1	0.64797
NonTargeting_Human_0289	1	0.84324	0.84339	0.988905	1553	0	0.90561	0.15676	0.15726	0.963532	410	1	0.90561
NonTargeting_Human_0731	1	0.84399	0.84408	0.988905	1554	0	0.95485	0.15601	0.15646	0.963532	408	1	0.95485
NonTargeting_Human_0885	1	0.84415	0.84422	0.988905	1555	0	1.6254	0.15585	0.15632	0.963532	407	1	1.6254
STXBP5L	15	0.84446	0.933	0.988905	1556	1	0.57797	0.052316	0.17047	0.963532	185	6	0.57797
NonTargeting_Human_0647	1	0.84489	0.84484	0.988905	1557	0	1.0096	0.15511	0.15567	0.963532	404	1	1.0096
NonTargeting_Human_0663	1	0.84613	0.84615	0.988905	1558	0	1.3281	0.15387	0.15455	0.963532	402	1	1.3281
NonTargeting_Human_0894	1	0.84737	0.84746	0.988905	1559	0	0.85063	0.15263	0.15334	0.963532	399	1	0.85063
NonTargeting_Human_0953	1	0.84935	0.84927	0.988905	1560	0	1.1883	0.15065	0.15149	0.963532	395	1	1.1883
NonTargeting_Human_0373	1	0.8496	0.84951	0.988905	1561	0	0.67403	0.1504	0.15122	0.963532	394	1	0.67403
NonTargeting_Human_0388	1	0.85042	0.8503	0.988905	1562	0	0.98549	0.14958	0.15035	0.963532	392	1	0.98549
NonTargeting_Human_0148	1	0.85108	0.85091	0.988905	1563	0	0.74717	0.14892	0.14971	0.963532	390	1	0.74717
NonTargeting_Human_0891	1	0.85141	0.85124	0.988905	1564	0	0.79395	0.14859	0.14941	0.963532	388	1	0.79395
NonTargeting_Human_0432	1	0.85158	0.85138	0.988905	1565	0	0.65795	0.14842	0.1492	0.963532	387	1	0.65795
NonTargeting_Human_0755	1	0.85174	0.85152	0.988905	1566	0	0.95811	0.14826	0.14904	0.963532	386	1	0.95811
NonTargeting_Human_0317	1	0.85199	0.85177	0.988905	1567	0	0.67316	0.14801	0.14885	0.963532	385	1	0.67316
PIGQ	15	0.85377	0.93612	0.988905	1568	1	1.1186	7.9773e-05	0.00061456	0.268564	3	10	1.1186
NonTargeting_Human_0531	1	0.85454	0.85431	0.988905	1569	0	0.87868	0.14546	0.14634	0.963532	381	1	0.87868
NonTargeting_Human_0581	1	0.85471	0.85451	0.988905	1570	0	0.83738	0.14529	0.14617	0.963532	380	1	0.83738
HIST2H2BF	15	0.85596	0.93675	0.988905	1571	2	0.18491	0.26911	0.50372	0.965334	618	4	0.18491
NonTargeting_Human_0005	1	0.85611	0.85613	0.988905	1572	0	0.7705	0.14389	0.14499	0.963532	377	1	0.7705
UPF1	14	0.85617	0.93097	0.988905	1573	2	0.7327	0.0069494	0.032226	0.902682	51	7	0.7327
NonTargeting_Human_0565	1	0.85702	0.85703	0.988905	1574	0	0.7393	0.14298	0.14412	0.963532	376	1	0.7393
EXOC2	15	0.85847	0.93752	0.988905	1575	2	-0.10926	0.20961	0.43326	0.965334	513	3	-0.10926
SSH3	15	0.85913	0.93771	0.988905	1576	2	0.014878	0.53757	0.7364	0.982717	1088	3	0.014878
NonTargeting_Human_0949	1	0.8609	0.86101	0.988905	1577	0	1.8608	0.1391	0.14021	0.961153	374	1	1.8608
PRPF38B	14	0.8624	0.93357	0.988905	1578	1	1.9475	1.3906e-06	8.4963e-06	0.014851	1	10	1.9475
NonTargeting_Human_0906	1	0.86312	0.86316	0.988905	1579	0	0.75315	0.13688	0.13785	0.948682	369	1	0.75315
NonTargeting_Human_0488	1	0.86345	0.86353	0.988905	1580	0	0.89856	0.13655	0.13755	0.948682	368	1	0.89856
NonTargeting_Human_0311	1	0.86362	0.86371	0.988905	1581	0	1.0406	0.13638	0.13736	0.948682	367	1	1.0406
NonTargeting_Human_0640	1	0.86395	0.86405	0.988905	1582	0	0.98984	0.13605	0.1371	0.948682	366	1	0.98984
NonTargeting_Human_0070	1	0.86444	0.86454	0.988905	1583	0	1.1339	0.13556	0.13662	0.948682	365	1	1.1339
NonTargeting_Human_0608	1	0.86485	0.8649	0.988905	1584	0	0.91729	0.13515	0.13612	0.948682	364	1	0.91729
NonTargeting_Human_0449	1	0.86543	0.86545	0.988905	1585	0	0.67291	0.13457	0.13558	0.948682	363	1	0.67291
NonTargeting_Human_0690	1	0.86593	0.86588	0.988905	1586	0	1.2093	0.13407	0.1351	0.948682	361	1	1.2093
NonTargeting_Human_0029	1	0.86601	0.86599	0.988905	1587	0	1.2483	0.13399	0.13505	0.948682	360	1	1.2483
NonTargeting_Human_0796	1	0.86659	0.86658	0.988905	1588	0	1.4644	0.13341	0.13448	0.948682	359	1	1.4644
MED20	15	0.86705	0.94063	0.988905	1589	2	0.046478	0.70732	0.83323	0.994766	1345	2	0.046478
POLR1B	14	0.86803	0.93586	0.988905	1590	2	0.8916	0.020066	0.077087	0.948682	92	6	0.8916
NonTargeting_Human_0094	1	0.86873	0.86862	0.988905	1591	0	0.9395	0.13127	0.13229	0.948682	355	1	0.9395
NonTargeting_Human_0457	1	0.86881	0.86872	0.988905	1592	0	1.2513	0.13119	0.13217	0.948682	354	1	1.2513
NonTargeting_Human_0562	1	0.86894	0.86883	0.988905	1593	0	1.661	0.13106	0.13207	0.948682	353	1	1.661
CAPN15	15	0.86924	0.94141	0.988905	1594	2	-0.1328	0.31703	0.55948	0.965334	708	4	-0.1328
NonTargeting_Human_0166	1	0.86972	0.86945	0.988905	1595	0	1.0754	0.13028	0.13124	0.948682	351	1	1.0754
ISG20	15	0.87079	0.94218	0.988905	1596	2	-0.19708	0.82147	0.89919	0.999997	1498	2	-0.19708
NonTargeting_Human_0918	1	0.87112	0.87094	0.988905	1597	0	1.3563	0.12888	0.12993	0.948682	349	1	1.3563
NonTargeting_Human_0385	1	0.87162	0.87144	0.988905	1598	0	1.6405	0.12838	0.1294	0.948682	347	1	1.6405
TMEM87B	14	0.87199	0.93782	0.988905	1599	2	-0.017179	0.33749	0.56883	0.965334	757	3	-0.017179
NonTargeting_Human_0047	1	0.87294	0.87268	0.988905	1600	0	1.0488	0.12706	0.12811	0.948682	343	1	1.0488
NonTargeting_Human_0331	1	0.8736	0.87341	0.988905	1601	0	1.0175	0.1264	0.12754	0.948682	342	1	1.0175
NonTargeting_Human_0282	1	0.87434	0.87411	0.988905	1602	0	0.94492	0.12566	0.12677	0.948682	340	1	0.94492
NonTargeting_Human_0983	1	0.87459	0.87439	0.988905	1603	0	1.0917	0.12541	0.12655	0.948682	339	1	1.0917
NonTargeting_Human_0718	1	0.87525	0.8751	0.988905	1604	0	1.0353	0.12475	0.12591	0.948682	338	1	1.0353
NonTargeting_Human_0188	1	0.87549	0.87533	0.988905	1605	0	1.747	0.12451	0.12564	0.948682	336	1	1.747
PGA3	15	0.87564	0.94404	0.988905	1606	2	0.29963	0.81945	0.8978	0.999997	1494	2	0.29963
TMEM30B	15	0.87572	0.94406	0.988905	1607	1	0.074843	0.95355	0.95452	0.999997	1661	1	0.074843
TNFRSF4	15	0.87594	0.94413	0.988905	1608	2	0.11292	0.40366	0.63507	0.965334	873	3	0.11292
NonTargeting_Human_0260	1	0.8764	0.87616	0.988905	1609	0	0.93193	0.1236	0.1248	0.948682	334	1	0.93193
NonTargeting_Human_0741	1	0.87896	0.87873	0.988905	1610	0	0.9064	0.12104	0.12221	0.948682	331	1	0.9064
NonTargeting_Human_0701	1	0.88135	0.8813	0.988905	1611	0	0.75766	0.11865	0.11983	0.948682	329	1	0.75766
NonTargeting_Human_0848	1	0.88284	0.88279	0.988905	1612	0	1.1463	0.11716	0.11831	0.948682	325	1	1.1463
NonTargeting_Human_0920	1	0.88292	0.88287	0.988905	1613	0	1.2141	0.11708	0.11821	0.948682	324	1	1.2141
EIF6	15	0.88344	0.9469	0.988905	1614	1	0.92833	0.0025567	0.014339	0.738061	28	8	0.92833
NonTargeting_Human_0155	1	0.88424	0.88417	0.988905	1615	0	1.3481	0.11576	0.1169	0.948682	321	1	1.3481
NonTargeting_Human_0963	1	0.8844	0.88433	0.988905	1616	0	1.2688	0.1156	0.11672	0.948682	320	1	1.2688
NonTargeting_Human_0650	1	0.88457	0.8845	0.988905	1617	0	0.69739	0.11543	0.11658	0.948682	319	1	0.69739
NonTargeting_Human_0706	1	0.88531	0.88536	0.988905	1618	0	1.2878	0.11469	0.11586	0.948682	318	1	1.2878
NonTargeting_Human_0404	1	0.88663	0.88689	0.988905	1619	0	1.2885	0.11337	0.11458	0.948682	315	1	1.2885
NUDT21	15	0.88833	0.9487	0.988905	1620	1	1.1374	0.00118	0.007202	0.599481	19	8	1.1374
NonTargeting_Human_0982	1	0.88844	0.88866	0.988905	1621	0	2.6451	0.11156	0.11284	0.948682	312	1	2.6451
NonTargeting_Human_0320	1	0.8891	0.88928	0.988905	1622	0	1.5512	0.1109	0.1122	0.948682	310	1	1.5512
NonTargeting_Human_0382	1	0.89059	0.89071	0.988905	1623	0	1.1314	0.10941	0.11078	0.948682	308	1	1.1314
NonTargeting_Human_0297	1	0.89075	0.89092	0.988905	1624	0	0.74198	0.10925	0.11065	0.948682	307	1	0.74198
NonTargeting_Human_0868	1	0.8915	0.89177	0.988905	1625	0	1.6567	0.1085	0.10979	0.948682	305	1	1.6567
NonTargeting_Human_0599	1	0.89207	0.89237	0.988905	1626	0	1.1038	0.10793	0.10913	0.948682	304	1	1.1038
POLR2L	15	0.89211	0.95003	0.988905	1627	1	1.3472	0.00041364	0.0028406	0.413779	11	8	1.3472
NonTargeting_Human_0327	1	0.89306	0.89331	0.988905	1628	0	1.1952	0.10694	0.10814	0.948682	300	1	1.1952
NonTargeting_Human_0286	1	0.89331	0.89358	0.988905	1629	0	1.215	0.10669	0.10783	0.948682	299	1	1.215
NonTargeting_Human_0781	1	0.89339	0.89369	0.988905	1630	0	1.0229	0.10661	0.10771	0.948682	298	1	1.0229
NonTargeting_Human_0674	1	0.89397	0.89422	0.988905	1631	0	0.95821	0.10603	0.10719	0.948682	296	1	0.95821
NonTargeting_Human_0877	1	0.89447	0.89479	0.988905	1632	0	1.2105	0.10553	0.10668	0.948682	294	1	1.2105
NonTargeting_Human_0980	1	0.89496	0.89528	0.988905	1633	0	2.0297	0.10504	0.10617	0.948682	292	1	2.0297
COG2	15	0.89563	0.9514	0.988905	1634	2	0.2887	0.26656	0.50056	0.965334	611	3	0.2887
NonTargeting_Human_0203	1	0.89603	0.89633	0.988905	1635	0	0.88109	0.10397	0.10507	0.948682	291	1	0.88109
XAGE1A	15	0.89696	0.95191	0.988905	1636	2	0.35021	0.30314	0.54401	0.965334	682	4	0.35021
hsa-mir-1229	15	0.89742	0.9521	0.988905	1637	2	0.40748	0.027482	0.10294	0.948682	116	6	0.40748
NonTargeting_Human_0244	1	0.89826	0.89859	0.988905	1638	0	1.1148	0.10174	0.10286	0.948682	288	1	1.1148
NonTargeting_Human_0756	1	0.89933	0.89966	0.988905	1639	0	0.93036	0.10067	0.10184	0.948682	285	1	0.93036
NonTargeting_Human_0710	1	0.89941	0.89978	0.988905	1640	0	1.3088	0.10059	0.10173	0.948682	284	1	1.3088
GLOD5	15	0.89968	0.95304	0.988905	1641	2	0.29663	0.051741	0.16902	0.963532	183	6	0.29663
SIRT5	15	0.9033	0.95453	0.988905	1642	2	-0.17122	0.10787	0.28136	0.965334	303	4	-0.17122
NonTargeting_Human_0544	1	0.90395	0.90438	0.988905	1643	0	1.423	0.096049	0.096815	0.948682	279	1	1.423
SPINT1	15	0.90408	0.95496	0.988905	1644	2	0.19112	0.13425	0.32855	0.965334	362	4	0.19112
NonTargeting_Human_0644	1	0.90552	0.90588	0.988905	1645	0	1.2695	0.094482	0.095331	0.948682	276	1	1.2695
NonTargeting_Human_0141	1	0.90601	0.90637	0.988905	1646	0	0.7291	0.093987	0.094799	0.948682	273	1	0.7291
NonTargeting_Human_0293	1	0.9061	0.90644	0.988905	1647	0	1.5218	0.093905	0.094657	0.948682	272	1	1.5218
IPO9	14	0.90619	0.95388	0.988905	1648	2	0.44943	0.0065008	0.030453	0.902682	47	5	0.44943
PEX6	15	0.90727	0.95636	0.989622	1649	2	0.13237	0.46385	0.6796	0.971876	969	1	0.13237
NonTargeting_Human_0945	1	0.90742	0.90779	0.988905	1650	0	1.4994	0.092585	0.093264	0.948682	269	1	1.4994
NonTargeting_Human_0875	1	0.90799	0.90837	0.988905	1651	0	1.5121	0.092008	0.092708	0.948682	268	1	1.5121
CDH1	15	0.90832	0.95679	0.989622	1652	2	0.42372	0.011569	0.05157	0.934298	72	6	0.42372
NonTargeting_Human_0236	1	0.90964	0.91002	0.988905	1653	0	1.9094	0.090358	0.090981	0.948682	266	1	1.9094
SRP9	15	0.91049	0.95767	0.98995	1654	2	-0.1039	0.96702	0.96687	0.999997	1683	0	-0.1039
NonTargeting_Human_0855	1	0.9117	0.91194	0.988905	1655	0	1.2411	0.088296	0.088902	0.948682	262	1	1.2411
NonTargeting_Human_0539	1	0.91236	0.91268	0.988905	1656	0	1.9425	0.087636	0.088324	0.948682	260	1	1.9425
NonTargeting_Human_0451	1	0.91327	0.91359	0.988905	1657	0	1.31	0.086729	0.087384	0.948682	257	1	1.31
NonTargeting_Human_0294	1	0.91509	0.91536	0.988905	1658	0	1.6314	0.084914	0.085742	0.948682	256	1	1.6314
NonTargeting_Human_0221	1	0.91533	0.91558	0.988905	1659	0	1.7965	0.084667	0.085572	0.948682	255	1	1.7965
NonTargeting_Human_0670	1	0.91566	0.91582	0.988905	1660	0	1.1821	0.084337	0.085288	0.948682	254	1	1.1821
TMEM253	15	0.91746	0.96108	0.99113	1661	1	0.024326	0.71081	0.83485	0.994766	1346	2	0.024326
NonTargeting_Human_0683	1	0.91904	0.91929	0.988905	1662	0	1.778	0.080955	0.081873	0.948682	246	1	1.778
NonTargeting_Human_0625	1	0.91913	0.91939	0.988905	1663	0	2.1339	0.080873	0.081771	0.948682	245	1	2.1339
NonTargeting_Human_0058	1	0.91921	0.9195	0.988905	1664	0	1.281	0.08079	0.081663	0.948682	244	1	1.281
NonTargeting_Human_0767	1	0.9197	0.92001	0.988905	1665	0	1.4474	0.080295	0.081222	0.948682	242	1	1.4474
NonTargeting_Human_0636	1	0.92086	0.92115	0.988905	1666	0	1.9648	0.079141	0.079947	0.948682	238	1	1.9648
LSM7	15	0.92307	0.96381	0.991751	1667	1	0.20988	0.0007823	0.004976	0.543626	15	7	0.20988
BOLA2	15	0.92374	0.96413	0.991751	1668	2	0.011254	0.10171	0.27003	0.965334	287	3	0.011254
NonTargeting_Human_0658	1	0.92408	0.9244	0.988905	1669	0	2.0322	0.075924	0.076713	0.948682	232	1	2.0322
LGR5	15	0.92452	0.96447	0.991751	1670	1	0.24826	0.38636	0.62203	0.965334	838	3	0.24826
SERPINA1	15	0.92477	0.96463	0.991751	1671	2	-0.25475	0.33148	0.57576	0.965334	744	3	-0.25475
NonTargeting_Human_0530	1	0.92564	0.92588	0.988905	1672	0	0.9194	0.074357	0.075036	0.948682	229	1	0.9194
NonTargeting_Human_0416	1	0.92845	0.92848	0.988905	1673	0	1.5998	0.071552	0.07217	0.948682	224	1	1.5998
EML4	15	0.92905	0.96669	0.991751	1674	2	0.0049373	0.2653	0.49901	0.965334	607	4	0.0049373
NonTargeting_Human_0281	1	0.93018	0.93016	0.988905	1675	0	1.311	0.06982	0.070346	0.948682	222	1	1.311
NonTargeting_Human_0912	1	0.93092	0.93088	0.988905	1676	0	2.251	0.069078	0.069525	0.948682	221	1	2.251
NonTargeting_Human_0312	1	0.93133	0.93131	0.988905	1677	0	2.5446	0.068665	0.069151	0.948682	220	1	2.5446
EIF3F	15	0.93248	0.96857	0.991882	1678	1	0.27144	0.36216	0.60405	0.965334	798	3	0.27144
NonTargeting_Human_0762	1	0.93406	0.93392	0.988905	1679	0	1.5329	0.065944	0.066568	0.948682	217	1	1.5329
NonTargeting_Human_0777	1	0.93653	0.93625	0.988905	1680	0	2.4247	0.063469	0.063991	0.948682	213	1	2.4247
NonTargeting_Human_0502	1	0.93777	0.93749	0.988905	1681	0	1.1507	0.062232	0.062734	0.948682	210	1	1.1507
NonTargeting_Human_0499	1	0.93859	0.93835	0.988905	1682	0	2.1329	0.061407	0.061963	0.948682	209	1	2.1329
NonTargeting_Human_0467	1	0.93934	0.93903	0.988905	1683	0	2.1641	0.060665	0.061289	0.948682	206	1	2.1641
NonTargeting_Human_0459	1	0.94313	0.94282	0.988905	1684	0	2.2216	0.056871	0.057358	0.94858	199	1	2.2216
NonTargeting_Human_0251	1	0.94412	0.94373	0.988905	1685	0	1.7663	0.055881	0.056373	0.947496	197	1	1.7663
NonTargeting_Human_0108	1	0.94536	0.94504	0.988905	1686	0	2.0056	0.054644	0.055053	0.934298	194	1	2.0056
NonTargeting_Human_0484	1	0.94569	0.94528	0.988905	1687	0	1.9389	0.054314	0.054685	0.934298	193	1	1.9389
NonTargeting_Human_0699	1	0.94602	0.94566	0.988905	1688	0	2.6602	0.053984	0.054464	0.934298	192	1	2.6602
NonTargeting_Human_0150	1	0.94651	0.9462	0.988905	1689	0	1.8746	0.053489	0.053949	0.934298	190	1	1.8746
NonTargeting_Human_0545	1	0.94742	0.94711	0.988905	1690	0	2.3901	0.052582	0.053144	0.934298	186	1	2.3901
NonTargeting_Human_0127	1	0.94824	0.94793	0.988905	1691	0	1.9506	0.051757	0.052431	0.934298	184	1	1.9506
NonTargeting_Human_0053	1	0.9489	0.94861	0.988905	1692	0	1.9016	0.051097	0.051779	0.934298	182	1	1.9016
NonTargeting_Human_0242	1	0.94915	0.94885	0.988905	1693	0	1.8206	0.05085	0.051536	0.934298	179	1	1.8206
NonTargeting_Human_0441	1	0.94948	0.9492	0.988905	1694	0	3.6335	0.05052	0.051162	0.934298	178	1	3.6335
NonTargeting_Human_0287	1	0.95113	0.95087	0.988905	1695	0	2.3701	0.04887	0.049542	0.934298	173	1	2.3701
NonTargeting_Human_0491	1	0.9522	0.95196	0.988905	1696	0	2.7284	0.047798	0.048415	0.934298	172	1	2.7284
CARM1	15	0.95248	0.97387	0.994084	1697	1	0.36648	0.15289	0.36107	0.965334	400	4	0.36648
NonTargeting_Human_0498	1	0.9527	0.95246	0.988905	1698	0	2.8466	0.047303	0.047865	0.934298	170	1	2.8466
ZNF213	15	0.95404	0.97416	0.994084	1699	1	-0.091727	0.5051	0.71108	0.982677	1033	2	-0.091727
NonTargeting_Human_0192	1	0.95517	0.95479	0.988905	1700	0	2.7567	0.044828	0.045379	0.934298	165	1	2.7567
DPY30	15	0.96006	0.97549	0.994084	1701	1	0.2137	0.026274	0.099398	0.948682	112	5	0.2137
NonTargeting_Human_0856	1	0.96012	0.95991	0.99113	1702	0	4.0118	0.03988	0.040173	0.902682	162	1	4.0118
HSPA8	15	0.96024	0.97557	0.994084	1703	1	0.1938	0.17868	0.39574	0.965334	446	2	0.1938
NonTargeting_Human_0695	1	0.96037	0.96015	0.99113	1704	0	3.5567	0.039632	0.039975	0.902682	161	1	3.5567
NonTargeting_Human_0309	1	0.96086	0.96078	0.99113	1705	0	3.0704	0.039137	0.039488	0.902682	159	1	3.0704
USP39	15	0.96103	0.97581	0.994084	1706	1	0.055802	0.30457	0.54554	0.965334	685	3	0.055802
SMARCB1	15	0.96324	0.97645	0.994084	1707	1	0.7562	0.016208	0.069242	0.948682	83	7	0.7562
OR52B2	15	0.96491	0.97689	0.994084	1708	1	0.24171	0.12122	0.30585	0.965334	332	5	0.24171
NonTargeting_Human_0921	1	0.96544	0.96537	0.991751	1709	0	5.0631	0.03456	0.034634	0.902682	145	1	5.0631
NonTargeting_Human_0253	1	0.96618	0.96607	0.991751	1710	0	5.0706	0.033817	0.033886	0.902682	143	1	5.0706
NonTargeting_Human_0981	1	0.96655	0.9665	0.991751	1711	0	5.088	0.033446	0.033574	0.902682	142	1	5.088
ISG15	15	0.96671	0.97754	0.994084	1712	1	0.29413	0.19086	0.41067	0.965334	474	3	0.29413
NonTargeting_Human_0790	1	0.96713	0.96711	0.991751	1713	0	4.9931	0.032869	0.03311	0.902682	141	1	4.9931
LAS1L	15	0.96717	0.97767	0.994084	1714	1	0.60608	0.10746	0.2807	0.965334	302	5	0.60608
NonTargeting_Human_0257	1	0.96734	0.96735	0.991751	1715	0	5.1291	0.032662	0.032889	0.902682	139	1	5.1291
NonTargeting_Human_0979	1	0.96936	0.96918	0.991882	1716	0	5.2525	0.030642	0.030861	0.902682	132	1	5.2525
NonTargeting_Human_0186	1	0.96985	0.96976	0.991892	1717	0	4.4657	0.030147	0.030414	0.902682	128	1	4.4657
hsa-mir-6770-1	10	0.96995	0.96898	0.991882	1718	0	0.15151	0.56334	0.69519	0.978416	1120	2	0.15151
EGLN2	15	0.97174	0.9794	0.994084	1719	1	0.17561	0.80372	0.88736	0.999997	1477	2	0.17561
CPSF2	15	0.97313	0.97987	0.994084	1720	1	0.15418	0.018381	0.076277	0.948682	86	6	0.15418
ZNRF3	15	0.97505	0.9807	0.994357	1721	1	0.035933	0.20293	0.42551	0.965334	497	4	0.035933
KIAA1328	14	0.97575	0.97843	0.994084	1722	1	0.21081	0.49073	0.695	0.978416	1006	2	0.21081
TBPL2	14	0.97808	0.97971	0.994084	1723	1	0.21143	0.58283	0.75942	0.986849	1159	2	0.21143
NonTargeting_Human_0390	1	0.97905	0.97887	0.994084	1724	0	5.869	0.02095	0.021091	0.902682	98	1	5.869
PHKG2	15	0.97922	0.9827	0.99523	1725	1	0.54017	0.094085	0.25571	0.965334	274	3	0.54017
NonTargeting_Human_0147	1	0.98243	0.98248	0.99523	1726	0	6.0387	0.017568	0.017686	0.813575	85	1	6.0387
PSMD5	15	0.98372	0.98516	0.996939	1727	1	0.1208	0.063813	0.19708	0.963532	215	5	0.1208
SP140	15	0.98512	0.9861	0.996939	1728	1	0.19947	0.62455	0.79475	0.988967	1232	2	0.19947
NonTargeting_Human_0237	1	0.98557	0.98574	0.996939	1729	0	6.2411	0.014434	0.014356	0.738061	80	1	6.2411
OLR1	15	0.98663	0.98715	0.997156	1730	1	0.084543	0.45232	0.6707	0.96891	948	2	0.084543
NonTargeting_Human_0359	1	0.9875	0.98769	0.997156	1731	0	6.3395	0.012496	0.01243	0.692296	77	1	6.3395
OR56A1	15	0.98785	0.98803	0.997156	1732	1	0.39269	0.49726	0.70483	0.981106	1014	3	0.39269
NonTargeting_Human_0191	1	0.98841	0.98862	0.997181	1733	0	6.4013	0.011589	0.011467	0.691192	73	1	6.4013
NonTargeting_Human_0772	1	0.98915	0.98941	0.997393	1734	0	6.4186	0.010846	0.010697	0.691192	70	1	6.4186
NonTargeting_Human_0824	1	0.98981	0.98999	0.997406	1735	0	6.4695	0.010186	0.010045	0.691192	66	1	6.4695
MGAT1	15	0.99175	0.99162	0.998474	1736	0	0.63694	0.0019395	0.011224	0.691192	25	8	0.63694
AKAP9	15	0.99301	0.99289	0.998489	1737	0	0.3324	0.1904	0.4101	0.965334	472	2	0.3324
CCDC178	14	0.99327	0.99298	0.998489	1738	0	0.53197	0.0063383	0.029751	0.902682	45	6	0.53197
NonTargeting_Human_0050	1	0.99336	0.99353	0.998489	1739	0	6.6838	0.0066397	0.006511	0.569059	49	1	6.6838
STOML3	15	0.9941	0.99392	0.998489	1740	0	0.1766	0.50413	0.71025	0.982677	1028	3	0.1766
NMT1	15	0.9964	0.9963	0.999946	1741	0	0.14463	0.84489	0.90779	0.999997	1521	1	0.14463
TPP2	15	0.99747	0.99744	0.999946	1742	0	0.11102	0.28848	0.52662	0.965334	658	2	0.11102
DHRSX	15	0.9979	0.99777	0.999946	1743	0	0.22234	0.023076	0.090573	0.948682	105	3	0.22234
NonTargeting_Human_0485	1	0.9988	0.99882	0.999946	1744	0	7.3868	0.001196	0.001232	0.37553	20	1	7.3868
RNF112	15	0.99917	0.99907	0.999946	1745	0	0.37707	0.22783	0.4553	0.965334	551	4	0.37707
NonTargeting_Human_0573	1	0.99979	0.99978	0.999946	1746	0	7.9205	0.0002062	0.00020674	0.120462	5	1	7.9205
KAT7	15	0.99988	0.99987	0.999946	1747	0	0.7001	0.011246	0.050255	0.934298	71	7	0.7001
MYLIP	15	0.99995	0.99995	0.999946	1748	0	1.4344	3.0328e-06	4.2481e-05	0.037129	2	10	1.4344

## Sheet: HepG2_LP-depl_gene
id	num	neg|score	neg|p-value	neg|fdr	neg|rank	neg|goodsgrna	neg|lfc	pos|score	pos|p-value	pos|fdr	pos|rank	pos|goodsgrna	pos|lfc
SCAP	15	1.1682e-30	2.8256e-06	0.000248	1	14	-3.4171	0.99998	0.99999	0.999997	1748	0	-3.4171
LDLR	15	1.451e-23	2.8256e-06	0.000248	2	15	-2.8281	1	1	0.999997	1752	0	-2.8281
MBTPS1	15	4.2377e-22	2.8256e-06	0.000248	3	14	-2.4369	0.79997	0.9281	0.999997	1531	1	-2.4369
MBTPS2	15	2.4942e-17	2.8256e-06	0.000248	4	13	-2.9133	0.99538	0.99536	0.999997	1723	1	-2.9133
DPAGT1	15	5.1147e-16	2.8256e-06	0.000248	5	13	-2.1025	0.99974	0.99979	0.999997	1745	0	-2.1025
DYRK1A	15	1.7611e-13	2.8256e-06	0.000248	6	13	-1.7366	0.97649	0.98877	0.999997	1701	1	-1.7366
SLC35B2	15	1.0072e-11	2.8256e-06	0.000248	7	14	-1.5026	0.99992	0.99993	0.999997	1746	0	-1.5026
GNB2L1	15	3.0985e-11	2.8256e-06	0.000248	8	14	-1.3615	0.73404	0.90575	0.999997	1446	1	-1.3615
hsa-mir-6886	13	6.3926e-11	2.8256e-06	0.000248	9	10	-1.9473	0.98092	0.98524	0.999997	1707	1	-1.9473
ALG2	15	2.2862e-10	2.8256e-06	0.000248	10	12	-1.5134	0.9709	0.98769	0.999997	1697	1	-1.5134
POLR3H	15	5.2984e-10	2.8256e-06	0.000248	11	13	-1.5252	0.44442	0.73133	0.965555	1045	2	-1.5252
ARFRP1	15	1.7118e-09	2.8256e-06	0.000248	12	11	-1.1983	0.99559	0.99553	0.999997	1724	1	-1.1983
TRAPPC1	15	2.1367e-09	2.8256e-06	0.000248	13	13	-1.5928	0.99889	0.99874	0.999997	1737	0	-1.5928
CHD7	15	3.9882e-09	2.8256e-06	0.000248	14	14	-0.88937	0.99967	0.99973	0.999997	1743	0	-0.88937
ATP6AP2	15	2.0909e-08	2.8256e-06	0.000248	15	14	-1.1264	1	1	0.999997	1751	0	-1.1264
SYS1	15	5.3319e-08	2.8256e-06	0.000248	16	11	-0.80504	0.79414	0.92599	0.999997	1521	1	-0.80504
ALG14	15	5.7869e-08	2.8256e-06	0.000248	17	11	-1.2469	0.6478	0.86055	0.992115	1330	1	-1.2469
SREBF2	15	1.3546e-07	2.8256e-06	0.000248	18	12	-0.99784	0.94909	0.97893	0.999997	1676	1	-0.99784
SEC61B	15	3.4172e-07	2.8256e-06	0.000248	19	12	-0.77087	0.77446	0.91903	0.999997	1497	1	-0.77087
ATXN7L3	15	3.8763e-07	2.8256e-06	0.000248	20	10	-0.85762	0.93447	0.97466	0.999997	1662	2	-0.85762
EXOC3	15	4.1212e-07	8.4769e-06	0.000619	21	12	-1.0812	0.57631	0.82188	0.977568	1243	2	-1.0812
HNF4A	15	4.3472e-07	8.4769e-06	0.000619	22	13	-1.0041	0.78111	0.92141	0.999997	1506	2	-1.0041
CTNNBIP1	15	5.8242e-07	8.4769e-06	0.000619	23	13	-0.98927	0.99993	0.99995	0.999997	1747	0	-0.98927
ELP3	15	9.9901e-07	8.4769e-06	0.000619	24	11	-0.94365	0.71253	0.89472	0.999997	1415	2	-0.94365
GPN2	15	1.4354e-06	1.4128e-05	0.000917	25	12	-0.99419	0.24041	0.52965	0.91306	673	3	-0.99419
GMPPB	15	1.5581e-06	1.4128e-05	0.000917	26	10	-1.0351	0.993	0.99374	0.999997	1721	1	-1.0351
AP2M1	15	1.5766e-06	1.4128e-05	0.000917	27	12	-0.98399	0.97906	0.98925	0.999997	1705	1	-0.98399
HYOU1	15	3.5116e-06	2.5431e-05	0.001591	28	12	-1.0627	0.83043	0.93925	0.999997	1555	1	-1.0627
EXOC4	15	3.765e-06	3.1082e-05	0.001878	29	10	-1.2402	0.99903	0.99888	0.999997	1738	0	-1.2402
FNDC3B	15	4.8385e-06	4.2384e-05	0.002475	30	12	-0.87946	0.99962	0.99965	0.999997	1742	0	-0.87946
WRB	15	5.57e-06	5.3687e-05	0.003034	31	10	-0.99405	0.9964	0.99627	0.999997	1727	0	-0.99405
MESDC2	15	6.1854e-06	5.9338e-05	0.003249	32	10	-0.74562	0.87411	0.95724	0.999997	1605	1	-0.74562
ZBTB8OS	15	1.0029e-05	7.6292e-05	0.00405	33	9	-0.83818	0.65287	0.86319	0.992115	1336	3	-0.83818
GET4	15	1.2618e-05	0.00011585	0.005799	34	10	-0.67484	0.94471	0.97757	0.999997	1673	2	-0.67484
GFER	15	1.2623e-05	0.00011585	0.005799	35	11	-0.8936	0.86849	0.95476	0.999997	1600	2	-0.8936
VHL	15	1.3766e-05	0.0001215	0.005862	36	11	-0.61015	0.81169	0.9323	0.999997	1540	2	-0.61015
EMC6	15	1.414e-05	0.00012715	0.005862	37	11	-0.80556	0.36649	0.66655	0.953192	918	1	-0.80556
KTI12	15	1.4586e-05	0.00012715	0.005862	38	12	-0.83325	0.99843	0.99825	0.999997	1736	0	-0.83325
ELP5	15	1.4772e-05	0.0001328	0.005966	39	11	-0.8859	0.51388	0.78691	0.970431	1159	1	-0.8859
UXT	15	1.5698e-05	0.00013846	0.006064	40	12	-0.93881	0.60515	0.83768	0.984526	1274	1	-0.93881
CCDC115	15	2.3231e-05	0.00020627	0.008814	41	10	-0.83229	0.99065	0.99247	0.999997	1716	1	-0.83229
GATS	15	2.8203e-05	0.00022888	0.009547	42	10	-0.9097	0.93511	0.9748	0.999997	1665	1	-0.9097
SRP19	15	3.6475e-05	0.0003193	0.013009	43	9	-0.64614	0.99973	0.99978	0.999997	1744	0	-0.64614
KIAA1432	15	4.162e-05	0.00037016	0.014739	44	10	-0.86127	0.71636	0.89677	0.999997	1423	1	-0.86127
VPS51	15	5.5492e-05	0.00048883	0.019032	45	12	-0.78042	0.99999	0.99999	0.999997	1749	0	-0.78042
TMEM199	15	5.9476e-05	0.00051144	0.019479	46	11	-1.2225	0.99068	0.9925	0.999997	1717	1	-1.2225
POLR3C	15	7.2815e-05	0.00062446	0.023205	47	11	-0.77628	0.5502	0.80817	0.973807	1211	1	-0.77628
PRMT1	15	7.5327e-05	0.00063577	0.023205	48	11	-0.84251	0.84515	0.94515	0.999997	1571	3	-0.84251
RAB10	15	7.7446e-05	0.00065837	0.02354	49	9	-0.68741	0.33611	0.64011	0.948799	860	2	-0.68741
INTS12	15	0.00010162	0.00087312	0.030577	50	11	-0.88708	0.31826	0.62454	0.942345	832	1	-0.88708
PAM16	15	0.00010377	0.00089007	0.030577	51	10	-0.63808	0.98429	0.99046	0.999997	1710	1	-0.63808
RABIF	15	0.00017626	0.0014665	0.04941	52	11	-0.48391	0.98852	0.99162	0.999997	1714	1	-0.48391
FDX1L	15	0.0001811	0.0015004	0.049598	53	10	-1.0383	0.96717	0.98597	0.999997	1695	2	-1.0383
USP39	15	0.00020401	0.001636	0.05308	54	10	-0.74225	0.60773	0.83922	0.984526	1282	1	-0.74225
CPSF3L	15	0.00035817	0.0027098	0.086319	55	10	-0.88087	0.5229	0.79398	0.970431	1173	4	-0.88087
WDR7	15	0.0004126	0.0032297	0.101043	56	10	-0.6271	0.6067	0.83859	0.984526	1281	1	-0.6271
TAF2	15	0.00042311	0.0033427	0.102744	57	9	-0.89052	0.9571	0.98182	0.999997	1683	2	-0.89052
EWSR1	15	0.00044538	0.0035179	0.105135	58	10	-0.92846	0.77261	0.91849	0.999997	1490	1	-0.92846
ACO2	15	0.00045083	0.0035405	0.105135	59	9	-1.0195	0.98738	0.99129	0.999997	1713	1	-1.0195
DNAJC13	15	0.00057821	0.0044956	0.131271	60	10	-0.73365	0.62385	0.84792	0.987722	1304	2	-0.73365
EXOC8	15	0.00075739	0.0056145	0.161256	61	9	-0.6174	0.99611	0.996	0.999997	1726	1	-0.6174
ZNHIT1	15	0.00080852	0.0059423	0.167918	62	9	-0.52553	0.99162	0.99298	0.999997	1718	1	-0.52553
SRP9	15	0.00095302	0.0068634	0.190869	63	8	-0.63387	0.79582	0.92654	0.999997	1524	2	-0.63387
MSTO1	15	0.0011555	0.0079767	0.216679	64	10	-0.68451	0.96057	0.98318	0.999997	1687	1	-0.68451
IPO9	15	0.0011647	0.0080389	0.216679	65	10	-0.62943	0.19744	0.47244	0.903587	581	1	-0.62943
C11orf57	15	0.0012308	0.0084458	0.224197	66	8	-0.41886	0.23129	0.5177	0.912349	657	4	-0.41886
STK40	15	0.0014542	0.0096721	0.252919	67	10	-0.3404	0.9994	0.99932	0.999997	1741	0	-0.3404
EIF2B4	15	0.0014821	0.0098586	0.254004	68	9	-0.5775	0.8313	0.93959	0.999997	1559	2	-0.5775
CABIN1	15	0.0015443	0.010294	0.261372	69	10	-0.53771	0.97653	0.98878	0.999997	1702	1	-0.53771
SMC1A	15	0.001618	0.010757	0.269236	70	7	-0.42524	0.50145	0.77711	0.968808	1139	5	-0.42524
PIK3R4	15	0.0018254	0.012074	0.297936	71	10	-0.56779	0.39696	0.6922	0.957587	981	3	-0.56779
PPIL2	15	0.0019232	0.012599	0.306587	72	9	-0.45001	0.95667	0.98165	0.999997	1681	1	-0.45001
SPDYE2	15	0.0021303	0.013679	0.328292	73	9	-0.63546	0.92318	0.97149	0.999997	1653	1	-0.63546
GPN1	15	0.0022316	0.014227	0.336834	74	9	-0.55547	0.99919	0.99907	0.999997	1740	0	-0.55547
GDI2	15	0.0024766	0.015764	0.368251	75	8	-0.45553	0.83091	0.93948	0.999997	1556	2	-0.45553
ZDHHC5	15	0.0026254	0.016668	0.38425	76	9	-0.57111	0.76347	0.91551	0.999997	1480	3	-0.57111
MEF2BNB	15	0.0032663	0.020093	0.452209	77	7	-0.19656	0.998	0.99776	0.999997	1735	0	-0.19656
INTS1	15	0.0034683	0.021076	0.467414	78	9	-0.70967	1	1	0.999997	1750	0	-0.70967
SETD1A	15	0.0035304	0.021387	0.467975	79	8	-0.60932	0.36246	0.66304	0.953192	907	1	-0.60932
GTF3C4	15	0.0036896	0.022263	0.472743	80	9	-0.42907	0.27122	0.56921	0.926051	740	2	-0.42907
EPB41	15	0.0038258	0.022828	0.472743	81	9	-0.53041	0.17097	0.43592	0.889402	523	4	-0.53041
RANBP1	15	0.0038307	0.022851	0.472743	82	9	-0.55023	0.3681	0.66792	0.953192	922	2	-0.55023
TAF7	15	0.0038444	0.022936	0.472743	83	9	-0.42037	0.98487	0.99062	0.999997	1711	1	-0.42037
TMEM258	15	0.0040473	0.02384	0.480881	84	8	-0.56352	0.69517	0.88537	0.997596	1393	2	-0.56352
GTF2E1	15	0.0041912	0.024642	0.490605	85	9	-0.5795	0.93473	0.9747	0.999997	1663	2	-0.5795
SNAPC3	15	0.0043658	0.025609	0.504116	86	8	-0.51025	0.99749	0.99734	0.999997	1732	0	-0.51025
VPS72	15	0.0048312	0.027801	0.541199	87	8	-0.44054	0.99569	0.99559	0.999997	1725	1	-0.44054
BRD2	15	0.0049523	0.028406	0.544608	88	7	-0.27446	0.34859	0.65082	0.952293	883	1	-0.27446
HNRNPU	15	0.0049873	0.028598	0.544608	89	7	-0.32301	0.6329	0.85274	0.98952	1317	3	-0.32301
CDC73	15	0.0050574	0.028954	0.545459	90	7	-0.51477	0.089148	0.28264	0.854998	319	5	-0.51477
PFDN2	15	0.0055156	0.031175	0.577957	91	8	-0.62478	0.3948	0.69026	0.957587	976	2	-0.62478
URI1	15	0.0060373	0.03369	0.605021	92	8	-0.50028	0.0086022	0.046784	0.757517	72	4	-0.50028
INTS2	15	0.0060446	0.033718	0.605021	93	9	-0.47089	0.69142	0.88356	0.997596	1388	3	-0.47089
TAF8	15	0.0060717	0.033843	0.605021	94	9	-0.49831	0.28842	0.59046	0.933655	770	2	-0.49831
SUMO2	15	0.0064064	0.035453	0.621139	95	8	-0.46908	0.67651	0.8755	0.994751	1363	2	-0.46908
CMTR1	15	0.0085511	0.045648	0.759184	96	8	-0.51631	0.46601	0.74822	0.968808	1073	2	-0.51631
MOCS3	15	0.0086126	0.045964	0.759184	97	8	-0.47287	0.99653	0.99641	0.999997	1728	0	-0.47287
IGF1R	15	0.0087137	0.046366	0.759184	98	9	-0.44455	0.81906	0.93493	0.999997	1545	1	-0.44455
COG5	15	0.0093946	0.049417	0.801659	99	7	-0.47734	0.074184	0.25012	0.838356	280	2	-0.47734
NMT1	15	0.0094967	0.049966	0.803116	100	7	-0.38683	0.83258	0.94014	0.999997	1560	3	-0.38683
NR2C2AP	15	0.010026	0.052418	0.834582	101	9	-0.5119	0.52865	0.79687	0.970609	1185	3	-0.5119
DCPS	15	0.010363	0.053882	0.839475	102	7	-0.22565	0.60496	0.83759	0.984526	1273	3	-0.22565
DEXI	15	0.010537	0.054741	0.839475	103	8	-0.74357	0.69745	0.88666	0.997708	1398	3	-0.74357
COG2	15	0.010626	0.055103	0.839475	104	7	-0.33604	0.47146	0.75279	0.968808	1080	3	-0.33604
RUVBL1	15	0.011028	0.056934	0.845318	105	7	-0.080141	0.26662	0.56366	0.926051	728	3	-0.080141
CIAPIN1	15	0.011572	0.059313	0.859136	106	7	-0.39909	0.68256	0.87876	0.996568	1373	3	-0.39909
RNMT	15	0.011985	0.061076	0.869959	107	8	-0.48563	0.90258	0.96677	0.999997	1631	2	-0.48563
VPS33A	15	0.012883	0.064404	0.909973	108	6	-0.24696	0.60927	0.83993	0.984526	1284	4	-0.24696
DET1	15	0.013227	0.065591	0.915062	109	8	-0.3965	0.89757	0.96567	0.999997	1626	2	-0.3965
HDAC6	15	0.013395	0.066332	0.915062	110	8	-0.41633	0.89917	0.96602	0.999997	1629	1	-0.41633
PDRG1	15	0.014106	0.068976	0.93856	111	8	-0.39079	0.57299	0.82009	0.977354	1236	4	-0.39079
PFDN6	15	0.015359	0.073819	0.972419	112	8	-0.43774	0.49602	0.77293	0.968808	1127	2	-0.43774
ERCC3	15	0.015852	0.075537	0.974483	113	7	-0.41318	0.26108	0.55675	0.926051	716	2	-0.41318
STAG2	15	0.016496	0.077973	0.982798	114	7	-0.3988	0.99787	0.99766	0.999997	1734	0	-0.3988
ACTR3	15	0.016911	0.079516	0.985323	115	8	-0.48121	0.045149	0.17454	0.834289	182	1	-0.48121
UBA2	15	0.018608	0.085631	0.999997	116	8	-0.42685	0.27039	0.5682	0.926051	735	4	-0.42685
NonTargeting_Human_0054	1	0.019805	0.020133	0.452209	117	1	-1.3069	0.9802	0.97995	0.999997	1706	0	-1.3069
TM9SF2	15	0.019878	0.090474	0.999997	118	8	-0.33169	0.092742	0.29036	0.856347	330	4	-0.33169
NCBP2	15	0.020224	0.091773	0.999997	119	8	-0.48056	0.86662	0.95394	0.999997	1598	1	-0.48056
NonTargeting_Human_0232	1	0.021445	0.021636	0.467975	120	1	-1.274	0.97856	0.97839	0.999997	1703	0	-1.274
SRP14	15	0.023113	0.10168	0.999997	121	8	-0.40824	0.19526	0.46952	0.903587	576	6	-0.40824
NonTargeting_Human_0605	1	0.023659	0.023879	0.480881	122	1	-1.5321	0.97634	0.97607	0.999997	1700	0	-1.5321
CCZ1	15	0.024172	0.10521	0.999997	123	8	-0.34726	0.99052	0.99245	0.999997	1715	1	-0.34726
CTDP1	15	0.024478	0.1063	0.999997	124	6	0.1465	0.64146	0.85738	0.990801	1324	2	0.1465
CCT6A	15	0.025811	0.11103	0.999997	125	8	-0.48853	0.0042181	0.025818	0.706346	44	5	-0.48853
PRR20A	15	0.026196	0.11233	0.999997	126	7	-0.27809	0.066138	0.23213	0.838356	253	4	-0.27809
CTR9	15	0.026613	0.11369	0.999997	127	8	-0.34983	0.0003288	0.0025459	0.3717	11	6	-0.34983
RPS14	15	0.027157	0.11555	0.999997	128	5	-0.024981	0.65914	0.86631	0.992115	1343	3	-0.024981
STT3A	15	0.027288	0.116	0.999997	129	8	-0.46499	0.74594	0.90976	0.999997	1458	1	-0.46499
SLC7A6OS	15	0.029442	0.12329	0.999997	130	8	-0.40406	0.91216	0.96906	0.999997	1640	2	-0.40406
PROX1	14	0.029673	0.12203	0.999997	131	7	-0.42653	0.0028664	0.017686	0.681238	33	1	-0.42653
NonTargeting_Human_0554	1	0.031122	0.031339	0.577957	132	1	-2.6113	0.96888	0.96875	0.999997	1696	0	-2.6113
PPP1R8	15	0.033216	0.13591	0.999997	133	8	-0.61404	0.94026	0.9763	0.999997	1668	2	-0.61404
UBE2I	15	0.034467	0.13987	0.999997	134	7	-0.31978	0.81065	0.93187	0.999997	1537	1	-0.31978
NonTargeting_Human_0481	1	0.03473	0.034831	0.616412	135	1	-1.0786	0.96527	0.96522	0.999997	1693	0	-1.0786
EIF2S2	15	0.034789	0.14098	0.999997	136	6	-0.041174	0.33812	0.64176	0.948881	862	3	-0.041174
SEC13	15	0.035174	0.14229	0.999997	137	8	-0.30003	0.48022	0.76011	0.968808	1097	1	-0.30003
SNF8	15	0.035341	0.14291	0.999997	138	7	-0.21711	0.48421	0.76332	0.968808	1105	4	-0.21711
RUVBL2	15	0.036065	0.14519	0.999997	139	8	-0.4595	0.47397	0.75487	0.968808	1088	4	-0.4595
NonTargeting_Human_0837	1	0.036534	0.036781	0.638026	140	1	-1.5574	0.96347	0.9634	0.999997	1691	0	-1.5574
GTF2H3	15	0.036565	0.14684	0.999997	141	7	-0.35236	0.79329	0.92574	0.999997	1518	1	-0.35236
BMI1	15	0.03738	0.14942	0.999997	142	4	0.015141	0.63152	0.85204	0.98952	1314	3	0.015141
KMT2D	15	0.038169	0.15195	0.999997	143	7	-0.18027	0.58848	0.82871	0.981011	1260	4	-0.18027
CARS	15	0.039277	0.15555	0.999997	144	7	-0.42007	0.90909	0.96824	0.999997	1638	2	-0.42007
ZNRF3	15	0.040759	0.1604	0.999997	145	7	-0.24192	0.97444	0.98842	0.999997	1698	1	-0.24192
NAA60	15	0.041284	0.16189	0.999997	146	6	-0.19282	0.51709	0.78941	0.970431	1165	5	-0.19282
SBK1	15	0.041466	0.1624	0.999997	147	6	-0.21319	0.67659	0.87552	0.994751	1364	4	-0.21319
C7orf26	15	0.042588	0.16524	0.999997	148	7	-0.39162	0.86301	0.95241	0.999997	1591	3	-0.39162
NonTargeting_Human_0955	1	0.043013	0.043467	0.746603	149	1	-2.3641	0.95699	0.95679	0.999997	1682	0	-2.3641
EPHA2	15	0.043481	0.16747	0.999997	150	4	-0.017252	0.52656	0.79595	0.970431	1182	3	-0.017252
TRIAP1	15	0.043995	0.1689	0.999997	151	6	-0.13843	0.14054	0.38623	0.87153	449	5	-0.13843
NonTargeting_Human_0326	1	0.043997	0.044405	0.755311	152	1	-0.90458	0.956	0.95569	0.999997	1679	0	-0.90458
RPL17	15	0.044468	0.17	0.999997	153	7	-0.40769	0.77044	0.91774	0.999997	1487	3	-0.40769
NonTargeting_Human_0886	1	0.044817	0.045348	0.759184	154	1	-1.8295	0.95518	0.95478	0.999997	1678	0	-1.8295
ZNF646	15	0.046039	0.17402	0.999997	155	6	-0.13362	0.10507	0.31598	0.858624	364	4	-0.13362
CENPA	15	0.046438	0.175	0.999997	156	6	-0.072654	0.18467	0.4551	0.899351	552	4	-0.072654
GTF2H2	15	0.048409	0.17989	0.999997	157	7	-0.13748	0.41663	0.70858	0.963096	1007	5	-0.13748
ARIH1	14	0.049071	0.17724	0.999997	158	5	0.025318	0.3942	0.68384	0.957587	973	3	0.025318
MED26	15	0.049792	0.18331	0.999997	159	7	-0.28736	0.052194	0.19497	0.834289	207	3	-0.28736
HDAC3	15	0.050762	0.18583	0.999997	160	5	-0.14917	0.077152	0.25674	0.848559	287	6	-0.14917
TNFAIP3	15	0.051507	0.18786	0.999997	161	7	-0.26924	0.59995	0.8349	0.984526	1268	3	-0.26924
NonTargeting_Human_0696	1	0.05228	0.052876	0.834582	162	1	-1.4539	0.94772	0.94739	0.999997	1675	0	-1.4539
TAF1	15	0.052747	0.19097	0.999997	163	6	-0.33085	0.34376	0.64655	0.952202	872	4	-0.33085
IL17RA	15	0.053325	0.19247	0.999997	164	6	-0.21464	0.74478	0.90932	0.999997	1456	3	-0.21464
NonTargeting_Human_0108	1	0.054658	0.055074	0.839475	165	1	-1.0893	0.94534	0.94502	0.999997	1674	0	-1.0893
hsa-mir-550a-1	9	0.055014	0.16663	0.999997	166	4	-0.18157	0.52754	0.73559	0.968255	1184	2	-0.18157
NonTargeting_Human_0689	1	0.055724	0.056227	0.845318	167	1	-1.7965	0.94428	0.94394	0.999997	1672	0	-1.7965
hsa-mir-6511a-4	15	0.05635	0.20031	0.999997	168	7	-0.33346	0.085361	0.27455	0.854998	308	2	-0.33346
NonTargeting_Human_0214	1	0.05638	0.056917	0.845318	169	1	-1.0836	0.94362	0.94321	0.999997	1671	0	-1.0836
NELFA	15	0.056482	0.20065	0.999997	170	7	0.016925	0.51764	0.78987	0.970431	1167	3	0.016925
hsa-mir-6859-1	14	0.057694	0.20113	0.999997	171	6	0.022849	0.00097752	0.0065018	0.519372	20	7	0.022849
NonTargeting_Human_0958	1	0.057774	0.058312	0.858516	172	1	-0.57092	0.94223	0.94206	0.999997	1670	0	-0.57092
COPS6	15	0.057799	0.20376	0.999997	173	7	-0.1976	0.082155	0.26749	0.854265	301	5	-0.1976
PGM1	15	0.057894	0.20398	0.999997	174	7	-0.076125	0.17657	0.44376	0.894672	536	6	-0.076125
NonTargeting_Human_0562	1	0.058758	0.059335	0.859136	175	1	-2.1845	0.94124	0.94101	0.999997	1669	0	-2.1845
TBPL2	15	0.059209	0.20745	0.999997	176	6	-0.11885	0.39456	0.69006	0.957587	975	5	-0.11885
NonTargeting_Human_0616	1	0.059742	0.060381	0.867108	177	1	-1.9922	0.94026	0.93996	0.999997	1667	0	-1.9922
ARHGEF35	15	0.059841	0.20904	0.999997	178	7	-0.3563	0.57374	0.82052	0.977354	1239	3	-0.3563
CIAO1	15	0.061763	0.2138	0.999997	179	6	-0.20388	0.60567	0.83798	0.984526	1275	3	-0.20388
C2orf49	15	0.064574	0.22047	0.999997	180	6	-0.10289	0.52444	0.7949	0.970431	1179	4	-0.10289
NonTargeting_Human_0495	1	0.065565	0.066145	0.915062	181	1	-1.1866	0.93443	0.93421	0.999997	1661	0	-1.1866
FAM110D	15	0.066753	0.22562	0.999997	182	7	-0.083204	0.164	0.42611	0.889402	501	4	-0.083204
C1GALT1	15	0.067713	0.22808	0.999997	183	4	-0.18478	0.30261	0.60723	0.939157	804	4	-0.18478
NCAPG2	15	0.068555	0.22992	0.999997	184	4	0.23191	0.27244	0.57073	0.926051	744	6	0.23191
NonTargeting_Human_0013	1	0.068599	0.069106	0.93856	185	1	-0.74714	0.9314	0.93136	0.999997	1660	0	-0.74714
DHDDS	15	0.069524	0.23224	0.999997	186	7	-0.14895	0.82153	0.9358	0.999997	1548	3	-0.14895
NonTargeting_Human_0909	1	0.069665	0.070225	0.94642	187	1	-0.92218	0.93033	0.93028	0.999997	1659	0	-0.92218
NonTargeting_Human_0872	1	0.070239	0.070836	0.947358	188	1	-0.80716	0.92976	0.92975	0.999997	1658	0	-0.80716
MAP1S	15	0.07179	0.23751	0.999997	189	5	-0.09748	0.20094	0.47726	0.903837	590	4	-0.09748
NonTargeting_Human_0026	1	0.072782	0.073514	0.972419	190	1	-1.063	0.92722	0.92729	0.999997	1657	0	-1.063
NonTargeting_Human_0959	1	0.074504	0.075255	0.974483	191	1	-0.80441	0.9255	0.92578	0.999997	1656	0	-0.80441
NonTargeting_Human_0093	1	0.074914	0.075645	0.974483	192	1	-1.0724	0.92509	0.92542	0.999997	1655	0	-1.0724
INTS8	15	0.07499	0.2451	0.999997	193	7	-0.46841	0.8847	0.96151	0.999997	1613	1	-0.46841
EXOC1	15	0.076638	0.24897	0.999997	194	7	-0.057671	0.75588	0.913	0.999997	1470	3	-0.057671
NonTargeting_Human_0687	1	0.076718	0.077561	0.982798	195	1	-0.69293	0.92328	0.92355	0.999997	1654	0	-0.69293
NonTargeting_Human_0069	1	0.076964	0.077821	0.982798	196	1	-0.80312	0.92304	0.9233	0.999997	1652	0	-0.80312
NonTargeting_Human_0742	1	0.078768	0.07964	0.985323	197	1	-1.1804	0.92123	0.92146	0.999997	1651	0	-1.1804
SREBF1	15	0.078826	0.25417	0.999997	198	7	-0.32711	0.89859	0.96593	0.999997	1628	1	-0.32711
GOLGA6A	15	0.07885	0.25421	0.999997	199	6	-0.16894	0.040426	0.16054	0.834289	171	3	-0.16894
NonTargeting_Human_0613	1	0.079014	0.079861	0.985323	200	1	-2.4353	0.92099	0.92124	0.999997	1650	0	-2.4353
NonTargeting_Human_0008	1	0.080654	0.081562	0.999273	201	1	-0.88962	0.91935	0.91969	0.999997	1649	0	-0.88962
HMOX2	15	0.080759	0.25856	0.999997	202	7	-0.37537	0.8599	0.95116	0.999997	1587	1	-0.37537
GPN3	15	0.080855	0.25875	0.999997	203	5	-0.30424	0.96228	0.98384	0.999997	1690	2	-0.30424
NOMO1	15	0.081015	0.25911	0.999997	204	6	-0.0021993	0.44082	0.72843	0.965555	1040	5	-0.0021993
DNAL4	15	0.08147	0.26011	0.999997	205	5	0.081947	0.41918	0.71071	0.965243	1010	5	0.081947
NonTargeting_Human_0515	1	0.082377	0.083364	0.999997	206	1	-1.0238	0.91762	0.91797	0.999997	1648	0	-1.0238
MFAP1	15	0.08291	0.26331	0.999997	207	6	-0.2032	0.49014	0.76802	0.968808	1117	4	-0.2032
NonTargeting_Human_0197	1	0.083115	0.08415	0.999997	208	1	-0.82149	0.91689	0.91721	0.999997	1646	0	-0.82149
NonTargeting_Human_0726	1	0.083197	0.084206	0.999997	209	1	-0.79145	0.9168	0.91705	0.999997	1645	0	-0.79145
NonTargeting_Human_0811	1	0.083771	0.084738	0.999997	210	1	-2.134	0.91623	0.91646	0.999997	1644	0	-2.134
TP53TG3	15	0.084457	0.26697	0.999997	211	6	-0.040358	0.96168	0.9836	0.999997	1688	2	-0.040358
WDR37	15	0.08595	0.27049	0.999997	212	6	-0.29209	0.59663	0.83314	0.983604	1264	3	-0.29209
RBBP5	15	0.086621	0.27197	0.999997	213	7	-0.29048	0.43847	0.7266	0.965555	1036	4	-0.29048
NonTargeting_Human_0352	1	0.086723	0.087416	0.999997	214	1	-0.68107	0.91328	0.91358	0.999997	1643	0	-0.68107
NonTargeting_Human_0302	1	0.086805	0.087484	0.999997	215	1	-0.74054	0.9132	0.91351	0.999997	1642	0	-0.74054
NonTargeting_Human_0879	1	0.086969	0.087614	0.999997	216	1	-0.72146	0.91303	0.91336	0.999997	1641	0	-0.72146
SCARB1	15	0.087463	0.27389	0.999997	217	7	-0.34431	0.99229	0.99334	0.999997	1720	1	-0.34431
BRICD5	15	0.087826	0.27474	0.999997	218	7	-0.20247	0.60251	0.8363	0.984526	1269	4	-0.20247
NonTargeting_Human_0555	1	0.087871	0.088569	0.999997	219	1	-0.7314	0.91213	0.91235	0.999997	1639	0	-0.7314
FNTB	15	0.088432	0.27613	0.999997	220	7	-0.10805	0.21037	0.48995	0.904583	604	5	-0.10805
FAM57B	15	0.088553	0.27636	0.999997	221	7	-0.41835	0.36254	0.66307	0.953192	909	4	-0.41835
EIF6	15	0.089163	0.2778	0.999997	222	7	-0.26589	0.055698	0.20511	0.834289	222	2	-0.26589
RCC1	15	0.089485	0.27854	0.999997	223	5	0.15672	0.0018436	0.012407	0.635785	26	7	0.15672
NonTargeting_Human_0985	1	0.092135	0.092875	0.999997	224	1	-1.0944	0.90786	0.90825	0.999997	1637	0	-1.0944
NonTargeting_Human_0345	1	0.093038	0.093808	0.999997	225	1	-1.2239	0.90696	0.90733	0.999997	1636	0	-1.2239
NonTargeting_Human_0324	1	0.09312	0.093904	0.999997	226	1	-1.8831	0.90688	0.90724	0.999997	1635	0	-1.8831
NonTargeting_Human_0346	1	0.094186	0.095057	0.999997	227	1	-0.80165	0.90581	0.90615	0.999997	1633	0	-0.80165
DOCK5	15	0.094961	0.2909	0.999997	228	5	-0.25404	0.98646	0.99102	0.999997	1712	1	-0.25404
NonTargeting_Human_0309	1	0.096072	0.09686	0.999997	229	1	-0.68729	0.90393	0.90434	0.999997	1632	0	-0.68729
AHSP	15	0.096097	0.29329	0.999997	230	5	0.21822	0.034974	0.14357	0.834289	155	7	0.21822
NonTargeting_Human_0287	1	0.10034	0.10148	0.999997	231	1	-0.9699	0.89966	0.90003	0.999997	1630	0	-0.9699
RNPEP	15	0.10156	0.30545	0.999997	232	5	-0.13812	0.24987	0.54209	0.921006	696	5	-0.13812
WARS	15	0.10246	0.30737	0.999997	233	7	-0.351	0.83114	0.93954	0.999997	1558	2	-0.351
NonTargeting_Human_0877	1	0.10263	0.10384	0.999997	234	1	-0.71963	0.89737	0.89765	0.999997	1625	0	-0.71963
TMEM165	15	0.10272	0.308	0.999997	235	5	-0.26774	0.9063	0.96759	0.999997	1634	1	-0.26774
SNX19	15	0.10286	0.30834	0.999997	236	7	-0.14831	0.44357	0.73064	0.965555	1043	5	-0.14831
COMMD10	15	0.10434	0.31153	0.999997	237	7	-0.35376	0.78885	0.92413	0.999997	1512	3	-0.35376
MEF2B	15	0.10569	0.31433	0.999997	238	7	-0.11586	0.416	0.708	0.963096	1006	3	-0.11586
CDIPT	15	0.10624	0.3154	0.999997	239	5	-0.069571	0.22504	0.50972	0.910624	640	3	-0.069571
NonTargeting_Human_0783	1	0.10772	0.10898	0.999997	240	1	-1.8918	0.89228	0.89249	0.999997	1623	0	-1.8918
NonTargeting_Human_0315	1	0.10829	0.10959	0.999997	241	1	-0.58535	0.89171	0.89195	0.999997	1622	0	-0.58535
RAB5C	15	0.10836	0.31999	0.999997	242	6	-0.30885	0.9175	0.97028	0.999997	1647	1	-0.30885
WDR55	15	0.10864	0.3206	0.999997	243	4	0.048273	0.19314	0.46651	0.903587	572	4	0.048273
NXPH2	15	0.10982	0.32303	0.999997	244	7	-0.26227	0.31481	0.62146	0.941213	825	3	-0.26227
NonTargeting_Human_0506	1	0.10993	0.11134	0.999997	245	1	-1.1443	0.89007	0.89022	0.999147	1620	0	-1.1443
CCDC101	15	0.10998	0.32338	0.999997	246	5	0.12003	0.20732	0.48589	0.904583	600	5	0.12003
NonTargeting_Human_0913	1	0.11001	0.11143	0.999997	247	1	-1.018	0.88999	0.89015	0.999147	1619	0	-1.018
DARS	15	0.1108	0.32529	0.999997	248	6	-0.22486	0.088954	0.28223	0.854998	318	4	-0.22486
TBX6	15	0.11098	0.32568	0.999997	249	4	-0.03421	0.62211	0.84693	0.987722	1302	4	-0.03421
ZNF263	15	0.11122	0.32623	0.999997	250	7	-0.27064	0.65402	0.86373	0.992115	1338	3	-0.27064
NonTargeting_Human_0128	1	0.11124	0.11252	0.999997	251	1	-0.86069	0.88876	0.88896	0.999006	1618	0	-0.86069
POLR2E	15	0.11136	0.32641	0.999997	252	7	-0.10617	0.04279	0.1676	0.834289	175	3	-0.10617
NonTargeting_Human_0451	1	0.11149	0.11278	0.999997	253	1	-0.72569	0.88851	0.8887	0.999006	1617	0	-0.72569
NonTargeting_Human_0237	1	0.11461	0.11577	0.999997	254	1	-1.8438	0.88539	0.88542	0.997596	1616	0	-1.8438
NonTargeting_Human_0470	1	0.11493	0.11619	0.999997	255	1	-0.57094	0.88507	0.88506	0.997596	1615	0	-0.57094
NonTargeting_Human_0769	1	0.11502	0.11624	0.999997	256	1	-0.80971	0.88498	0.885	0.997596	1614	0	-0.80971
MED8	15	0.1152	0.33303	0.999997	257	5	0.30267	0.085592	0.2751	0.854998	309	4	0.30267
NonTargeting_Human_0866	1	0.11641	0.11754	0.999997	258	1	-1.3841	0.88359	0.88345	0.997596	1612	0	-1.3841
CEBPZ	15	0.11784	0.33752	0.999997	259	3	0.5833	0.022319	0.10268	0.803055	123	8	0.5833
NonTargeting_Human_0868	1	0.11846	0.1197	0.999997	260	1	-1.0117	0.88154	0.88147	0.996993	1610	0	-1.0117
NonTargeting_Human_0041	1	0.11871	0.11991	0.999997	261	1	-0.60201	0.88129	0.88124	0.996993	1609	0	-0.60201
NonTargeting_Human_0911	1	0.11895	0.1202	0.999997	262	1	-1.3786	0.88105	0.88091	0.996993	1608	0	-1.3786
COMMD3	15	0.12002	0.34126	0.999997	263	3	0.097657	0.070099	0.24118	0.838356	264	5	0.097657
NonTargeting_Human_0591	1	0.12141	0.1226	0.999997	264	1	-0.89944	0.87859	0.87835	0.996568	1606	0	-0.89944
hsa-mir-1976	12	0.12191	0.32482	0.999997	265	4	-0.082026	0.46654	0.7215	0.965555	1074	4	-0.082026
HIST2H2BF	15	0.12226	0.34519	0.999997	266	5	0.13177	0.5106	0.78435	0.970431	1155	3	0.13177
CSNK1A1	15	0.12287	0.34618	0.999997	267	3	0.21578	0.25407	0.54753	0.921006	705	5	0.21578
CEP120	15	0.12672	0.35264	0.999997	268	5	-0.2342	0.24141	0.531	0.91306	676	4	-0.2342
NonTargeting_Human_0508	1	0.1274	0.12838	0.999997	269	1	-1.1684	0.8726	0.87238	0.994751	1604	0	-1.1684
NonTargeting_Human_0621	1	0.12773	0.12869	0.999997	270	1	-1.1297	0.87227	0.87207	0.994751	1603	0	-1.1297
GAGE1	14	0.12803	0.34737	0.999997	271	6	-0.21546	0.97894	0.98659	0.999997	1704	1	-0.21546
CDT1	15	0.12828	0.35535	0.999997	272	6	-0.024681	0.20139	0.47777	0.903837	591	4	-0.024681
NonTargeting_Human_0709	1	0.12978	0.13083	0.999997	273	1	-0.91415	0.87022	0.87	0.993923	1602	0	-0.91415
COPS2	15	0.12978	0.35807	0.999997	274	6	0.084371	0.23429	0.5217	0.91306	661	5	0.084371
ROR1	15	0.13049	0.35934	0.999997	275	3	-0.033958	0.43736	0.72582	0.965555	1033	5	-0.033958
NonTargeting_Human_0489	1	0.13076	0.13178	0.999997	276	1	-0.83206	0.86924	0.86907	0.99387	1601	0	-0.83206
PFN1	15	0.13192	0.36181	0.999997	277	6	-0.14535	0.11217	0.33044	0.86667	389	3	-0.14535
NonTargeting_Human_0250	1	0.13232	0.13349	0.999997	278	1	-0.5002	0.86768	0.86768	0.992935	1599	0	-0.5002
NonTargeting_Human_0635	1	0.13355	0.13461	0.999997	279	1	-1.6092	0.86645	0.8664	0.992115	1597	0	-1.6092
NonTargeting_Human_0443	1	0.13421	0.13523	0.999997	280	1	-0.91265	0.86579	0.86579	0.992115	1595	0	-0.91265
NonTargeting_Human_0487	1	0.13478	0.13575	0.999997	281	1	-0.60367	0.86522	0.86523	0.992115	1594	0	-0.60367
PIK3C3	15	0.13592	0.36807	0.999997	282	3	0.05144	0.83346	0.94047	0.999997	1562	2	0.05144
NonTargeting_Human_0895	1	0.13634	0.13735	0.999997	283	1	-1.1856	0.86366	0.86376	0.992115	1592	0	-1.1856
NonTargeting_Human_0548	1	0.13781	0.13885	0.999997	284	1	-0.75043	0.86219	0.86222	0.992115	1589	0	-0.75043
SAFB	15	0.14089	0.37591	0.999997	285	6	-0.21074	0.47654	0.75719	0.968808	1092	2	-0.21074
NonTargeting_Human_0010	1	0.14118	0.14233	0.999997	286	1	-0.58427	0.85882	0.85893	0.991335	1586	0	-0.58427
INPP5J	15	0.14124	0.37652	0.999997	287	5	0.047003	0.43957	0.72742	0.965555	1039	4	0.047003
NonTargeting_Human_0037	1	0.14372	0.14485	0.999997	288	1	-0.75119	0.85628	0.85632	0.990279	1584	0	-0.75119
NonTargeting_Human_0460	1	0.14429	0.14543	0.999997	289	1	-0.99813	0.85571	0.85567	0.990181	1583	0	-0.99813
INTS6	14	0.14482	0.37722	0.999997	290	4	-0.092725	0.024403	0.10641	0.803055	132	4	-0.092725
NonTargeting_Human_0141	1	0.14528	0.14621	0.999997	291	1	-0.34492	0.85472	0.85453	0.98952	1582	0	-0.34492
NonTargeting_Human_0323	1	0.14569	0.14658	0.999997	292	1	-0.66246	0.85431	0.85409	0.98952	1581	0	-0.66246
NonTargeting_Human_0103	1	0.14585	0.14673	0.999997	293	1	-0.59312	0.85415	0.85392	0.98952	1580	0	-0.59312
GPR152	15	0.14608	0.38382	0.999997	294	5	0.10552	0.27652	0.57586	0.926051	750	6	0.10552
SULT1A2	15	0.14747	0.38612	0.999997	295	6	-0.31155	0.73332	0.90534	0.999997	1445	4	-0.31155
CACNA1A	15	0.1507	0.3913	0.999997	296	6	-0.19571	0.14586	0.39592	0.87153	460	3	-0.19571
NonTargeting_Human_0559	1	0.15093	0.15181	0.999997	297	1	-0.84909	0.84907	0.84904	0.987722	1576	0	-0.84909
PHKG2	15	0.15103	0.39179	0.999997	298	6	-0.11661	0.31268	0.61952	0.941213	819	3	-0.11661
NonTargeting_Human_0105	1	0.15159	0.15237	0.999997	299	1	-0.64916	0.84841	0.84838	0.987722	1574	0	-0.64916
AGPAT1	15	0.152	0.39354	0.999997	300	6	-0.033962	0.97512	0.98855	0.999997	1699	1	-0.033962
NonTargeting_Human_0459	1	0.15266	0.15339	0.999997	301	1	-0.72778	0.84734	0.84743	0.987722	1573	0	-0.72778
NRBP1	15	0.15274	0.39455	0.999997	302	6	0.032985	0.50397	0.77905	0.968808	1144	5	0.032985
NonTargeting_Human_0704	1	0.1529	0.15362	0.999997	303	1	-0.52225	0.8471	0.8472	0.987722	1572	0	-0.52225
NonTargeting_Human_0137	1	0.15528	0.15582	0.999997	304	1	-0.50223	0.84472	0.84469	0.987256	1570	0	-0.50223
SNX1	15	0.15578	0.39969	0.999997	305	5	-0.11409	0.32987	0.63483	0.944481	849	5	-0.11409
NonTargeting_Human_0449	1	0.15651	0.15705	0.999997	306	1	-0.48897	0.84349	0.84356	0.986593	1569	0	-0.48897
NonTargeting_Human_0721	1	0.15758	0.15816	0.999997	307	1	-0.73716	0.84242	0.84254	0.986061	1568	0	-0.73716
NonTargeting_Human_0960	1	0.15823	0.15887	0.999997	308	1	-1.0897	0.84177	0.84178	0.985834	1567	0	-1.0897
NonTargeting_Human_0771	1	0.15987	0.16046	0.999997	309	1	-1.0311	0.84013	0.84011	0.984526	1566	0	-1.0311
NonTargeting_Human_0581	1	0.16028	0.16085	0.999997	310	1	-0.53433	0.83972	0.83968	0.984526	1565	0	-0.53433
WDR82	15	0.1615	0.40872	0.999997	311	5	-0.39155	0.023119	0.10537	0.803055	129	3	-0.39155
C21orf59	15	0.16207	0.40975	0.999997	312	4	-0.23304	0.31568	0.62227	0.941213	827	5	-0.23304
TFRC	15	0.16311	0.41152	0.999997	313	5	-0.26235	0.11058	0.32718	0.865285	382	3	-0.26235
NonTargeting_Human_0944	1	0.16414	0.16465	0.999997	314	1	-0.50263	0.83586	0.8356	0.984526	1563	0	-0.50263
ANKHD1-EIF4EBP3	15	0.16646	0.41717	0.999997	315	5	-0.20644	0.99755	0.99738	0.999997	1733	0	-0.20644
NonTargeting_Human_0833	1	0.16701	0.16743	0.999997	316	1	-0.62427	0.83299	0.8327	0.983604	1561	0	-0.62427
RPS8	14	0.16762	0.41513	0.999997	317	6	-0.043162	0.36315	0.65415	0.952366	912	4	-0.043162
ALG13	15	0.16851	0.42023	0.999997	318	4	0.040899	0.49687	0.7736	0.968808	1129	4	0.040899
CCDC53	15	0.16913	0.42116	0.999997	319	6	0.15873	0.004821	0.02909	0.714178	50	6	0.15873
NonTargeting_Human_0061	1	0.16971	0.17012	0.999997	320	1	-0.57482	0.83029	0.83004	0.981919	1554	0	-0.57482
NAA38	15	0.17195	0.42542	0.999997	321	6	-0.39614	0.27571	0.57488	0.926051	749	5	-0.39614
NonTargeting_Human_0380	1	0.17258	0.17301	0.999997	322	1	-0.97183	0.82742	0.82714	0.97982	1553	0	-0.97183
NonTargeting_Human_0190	1	0.17308	0.17352	0.999997	323	1	-0.53572	0.82692	0.82663	0.97982	1552	0	-0.53572
NonTargeting_Human_0401	1	0.1734	0.17385	0.999997	324	1	-0.55037	0.8266	0.8264	0.97982	1551	0	-0.55037
ATP6V0D1	15	0.17342	0.42762	0.999997	325	6	-0.31074	0.57069	0.8188	0.977354	1233	3	-0.31074
TNFRSF8	15	0.17345	0.42764	0.999997	326	3	0.24913	0.01199	0.06163	0.775699	87	7	0.24913
hsa-mir-532	15	0.17367	0.428	0.999997	327	5	-0.16688	0.46189	0.74508	0.968808	1068	4	-0.16688
NonTargeting_Human_0409	1	0.17513	0.17555	0.999997	328	1	-0.4482	0.82487	0.82471	0.979584	1550	0	-0.4482
NonTargeting_Human_0428	1	0.17734	0.17773	0.999997	329	1	-0.68071	0.82266	0.82242	0.977568	1549	0	-0.68071
DDX52	15	0.17797	0.43474	0.999997	330	6	-0.18249	0.96424	0.98464	0.999997	1692	2	-0.18249
NonTargeting_Human_0665	1	0.17915	0.17931	0.999997	331	1	-0.45172	0.82085	0.8206	0.977354	1547	0	-0.45172
TCERG1	15	0.17974	0.43734	0.999997	332	6	-0.3728	0.74256	0.90857	0.999997	1454	2	-0.3728
NonTargeting_Human_0423	1	0.17988	0.1799	0.999997	333	1	-0.53666	0.82012	0.81982	0.977354	1546	0	-0.53666
DHX36	15	0.18034	0.4383	0.999997	334	6	-0.022325	0.67473	0.87461	0.994751	1359	4	-0.022325
NonTargeting_Human_0375	1	0.18103	0.18105	0.999997	335	1	-0.54254	0.81897	0.81877	0.977354	1544	0	-0.54254
FURIN	15	0.18154	0.44012	0.999997	336	6	-0.064729	0.3527	0.65448	0.952366	892	3	-0.064729
DENND4A	15	0.18279	0.44203	0.999997	337	5	-0.22776	0.56608	0.8163	0.976888	1226	3	-0.22776
SPSB3	15	0.18376	0.44354	0.999997	338	6	-0.0059933	0.24107	0.53057	0.91306	674	6	-0.0059933
NonTargeting_Human_0757	1	0.1839	0.18378	0.999997	339	1	-0.62963	0.8161	0.81593	0.976888	1543	0	-0.62963
NonTargeting_Human_0558	1	0.18472	0.18451	0.999997	340	1	-0.56156	0.81528	0.81509	0.976849	1542	0	-0.56156
SPAG7	15	0.18533	0.44588	0.999997	341	4	-0.031737	0.27051	0.56832	0.926051	736	5	-0.031737
C1orf198	15	0.18557	0.44624	0.999997	342	5	-0.13556	0.99698	0.99688	0.999997	1730	0	-0.13556
NonTargeting_Human_0437	1	0.18579	0.18553	0.999997	343	1	-0.59108	0.81421	0.81418	0.976849	1541	0	-0.59108
ZNF232	15	0.18596	0.4468	0.999997	344	6	0.20631	0.12857	0.3634	0.869083	425	7	0.20631
CTIF	15	0.18737	0.44881	0.999997	345	3	0.17384	0.36253	0.66307	0.953192	908	5	0.17384
NonTargeting_Human_0183	1	0.18858	0.18853	0.999997	346	1	-0.46823	0.81142	0.81141	0.975703	1539	0	-0.46823
NonTargeting_Human_0595	1	0.18874	0.18865	0.999997	347	1	-0.47163	0.81126	0.8113	0.975703	1538	0	-0.47163
RPP38	15	0.18911	0.45146	0.999997	348	5	-0.18358	0.0067443	0.038188	0.72114	61	4	-0.18358
NonTargeting_Human_0262	1	0.19063	0.19046	0.999997	349	1	-0.37301	0.80937	0.80941	0.974628	1536	0	-0.37301
ARPC4	15	0.19069	0.45366	0.999997	350	5	-0.19059	0.96027	0.98304	0.999997	1686	1	-0.19059
ATP6V1H	15	0.19471	0.4596	0.999997	351	6	0.32123	0.12655	0.3592	0.869083	418	5	0.32123
NUDT5	15	0.19502	0.46013	0.999997	352	6	-0.29029	0.67524	0.87485	0.994751	1360	4	-0.29029
ST6GAL1	15	0.19504	0.46015	0.999997	353	4	-0.13033	0.99916	0.99905	0.999997	1739	0	-0.13033
NonTargeting_Human_0987	1	0.19538	0.19507	0.999997	354	1	-0.89892	0.80462	0.80512	0.972136	1535	0	-0.89892
NonTargeting_Human_0658	1	0.19653	0.19627	0.999997	355	1	-0.80397	0.80347	0.80393	0.97183	1534	0	-0.80397
NonTargeting_Human_0758	1	0.19694	0.19666	0.999997	356	1	-0.72637	0.80306	0.80346	0.97183	1533	0	-0.72637
ASH2L	15	0.19844	0.46537	0.999997	357	2	-0.16313	0.47896	0.75915	0.968808	1095	3	-0.16313
NonTargeting_Human_0201	1	0.19899	0.19868	0.999997	358	1	-0.37172	0.80101	0.80156	0.971184	1532	0	-0.37172
NonTargeting_Human_0640	1	0.20006	0.19981	0.999997	359	1	-0.61477	0.79994	0.80053	0.970609	1530	0	-0.61477
NonTargeting_Human_0781	1	0.20039	0.20007	0.999997	360	1	-0.43708	0.79961	0.80016	0.970609	1529	0	-0.43708
CSNK2A2	15	0.20054	0.46833	0.999997	361	6	-0.14233	0.35144	0.65335	0.952366	889	5	-0.14233
NonTargeting_Human_0986	1	0.20104	0.20083	0.999997	362	1	-0.4545	0.79896	0.79946	0.970609	1528	0	-0.4545
NonTargeting_Human_0815	1	0.20133	0.20115	0.999997	363	1	-0.82054	0.79867	0.79919	0.970609	1527	0	-0.82054
NonTargeting_Human_0328	1	0.20186	0.20165	0.999997	364	1	-0.69932	0.79814	0.79871	0.970609	1526	0	-0.69932
NonTargeting_Human_0974	1	0.20203	0.20176	0.999997	365	1	-0.95822	0.79797	0.79858	0.970609	1525	0	-0.95822
RPL13A	14	0.20209	0.46808	0.999997	366	4	-0.18112	0.14878	0.39152	0.87153	465	5	-0.18112
CLK2	15	0.2024	0.47089	0.999997	367	5	0.090829	0.21052	0.49015	0.904583	606	5	0.090829
XAGE1A	15	0.20343	0.47253	0.999997	368	2	0.26226	0.025416	0.11291	0.807011	133	7	0.26226
NonTargeting_Human_0067	1	0.20547	0.20531	0.999997	369	1	-0.44148	0.79453	0.79502	0.970431	1522	0	-0.44148
NonTargeting_Human_0712	1	0.20588	0.20572	0.999997	370	1	-0.40619	0.79412	0.79459	0.970431	1520	0	-0.40619
NonTargeting_Human_0112	1	0.20621	0.20605	0.999997	371	1	-0.74137	0.79379	0.79422	0.970431	1519	0	-0.74137
ASB16	15	0.20663	0.47751	0.999997	372	3	0.27649	0.13518	0.37638	0.869083	444	4	0.27649
NonTargeting_Human_0848	1	0.20678	0.20661	0.999997	373	1	-0.69655	0.79322	0.79363	0.970431	1517	0	-0.69655
NonTargeting_Human_0038	1	0.20695	0.20684	0.999997	374	1	-0.47058	0.79305	0.79347	0.970431	1516	0	-0.47058
POLR2C	15	0.20731	0.4785	0.999997	375	5	0.026823	0.28218	0.58293	0.926847	761	4	0.026823
ZFR	15	0.20778	0.47925	0.999997	376	3	-0.07854	0.12594	0.35794	0.869083	416	2	-0.07854
NonTargeting_Human_0679	1	0.20826	0.20803	0.999997	377	1	-0.50005	0.79174	0.79223	0.970431	1515	0	-0.50005
RALGAPB	15	0.20937	0.48152	0.999997	378	6	-0.22644	0.22986	0.51593	0.912349	651	5	-0.22644
NonTargeting_Human_0033	1	0.20949	0.20925	0.999997	379	1	-0.50726	0.79051	0.79103	0.970431	1514	0	-0.50726
NonTargeting_Human_0652	1	0.20965	0.20941	0.999997	380	1	-0.62481	0.79035	0.79087	0.970431	1513	0	-0.62481
COMMD2	15	0.20966	0.48195	0.999997	381	5	-0.064668	0.19288	0.46623	0.903587	571	5	-0.064668
ZBTB44	15	0.21013	0.48259	0.999997	382	5	0.061764	0.54255	0.80431	0.97183	1200	4	0.061764
EXOC7	15	0.21045	0.48303	0.999997	383	6	-0.18166	0.38647	0.68308	0.957587	959	2	-0.18166
PQBP1	15	0.21109	0.48396	0.999997	384	6	-0.2398	0.85287	0.94824	0.999997	1578	2	-0.2398
KLC2	15	0.21221	0.48567	0.999997	385	4	-0.0531	0.21135	0.49132	0.904583	608	5	-0.0531
NonTargeting_Human_0801	1	0.21244	0.21211	0.999997	386	1	-0.57423	0.78756	0.78824	0.970431	1511	0	-0.57423
NonTargeting_Human_0612	1	0.21269	0.21232	0.999997	387	1	-0.86956	0.78731	0.788	0.970431	1510	0	-0.86956
NonTargeting_Human_0992	1	0.21326	0.21294	0.999997	388	1	-1.0008	0.78674	0.7874	0.970431	1509	0	-1.0008
ANKRD36	15	0.21369	0.48778	0.999997	389	5	0.0021799	0.1475	0.39909	0.874764	463	5	0.0021799
TNFRSF4	15	0.21631	0.49136	0.999997	390	5	-0.14166	0.89072	0.96425	0.999997	1621	3	-0.14166
hsa-mir-3670-1	5	0.21676	0.36132	0.999997	391	2	-0.15941	0.86445	0.86475	0.992115	1593	0	-0.15941
NonTargeting_Human_0272	1	0.21687	0.21662	0.999997	392	1	-0.45023	0.78313	0.78384	0.970431	1508	0	-0.45023
NonTargeting_Human_0571	1	0.21933	0.2192	0.999997	393	1	-0.57105	0.78067	0.78135	0.968808	1505	0	-0.57105
NonTargeting_Human_0486	1	0.21974	0.2195	0.999997	394	1	-0.60802	0.78026	0.78093	0.968808	1504	0	-0.60802
NonTargeting_Human_0014	1	0.21999	0.21969	0.999997	395	1	-0.39933	0.78001	0.78064	0.968808	1503	0	-0.39933
ERP44	15	0.22017	0.49688	0.999997	396	3	0.34286	0.017689	0.085568	0.793132	105	6	0.34286
SPATA5	15	0.22018	0.4969	0.999997	397	2	0.21773	0.0042968	0.026259	0.706346	46	4	0.21773
NonTargeting_Human_0728	1	0.22023	0.21997	0.999997	398	1	-0.37447	0.77977	0.78037	0.968808	1502	0	-0.37447
NonTargeting_Human_0493	1	0.22031	0.22002	0.999997	399	1	-0.62384	0.77969	0.78029	0.968808	1501	0	-0.62384
NonTargeting_Human_0087	1	0.22072	0.22044	0.999997	400	1	-0.54196	0.77928	0.77988	0.968808	1500	0	-0.54196
NonTargeting_Human_0284	1	0.2213	0.22101	0.999997	401	1	-0.36135	0.7787	0.77936	0.968808	1499	0	-0.36135
IRS4	15	0.22177	0.49945	0.999997	402	6	-0.14386	0.27748	0.57706	0.926051	754	4	-0.14386
SNAPC2	15	0.22305	0.50141	0.999997	403	6	-0.16849	0.16998	0.4347	0.889402	519	2	-0.16849
NonTargeting_Human_0718	1	0.22384	0.22348	0.999997	404	1	-0.45769	0.77616	0.77672	0.968808	1498	0	-0.45769
MED20	15	0.22386	0.50268	0.999997	405	5	-0.16776	0.49926	0.77534	0.968808	1135	3	-0.16776
METAP1	15	0.22504	0.5043	0.999997	406	3	0.13026	0.19443	0.46817	0.903587	575	5	0.13026
NonTargeting_Human_0587	1	0.22564	0.22548	0.999997	407	1	-0.34531	0.77436	0.7748	0.968808	1496	0	-0.34531
STX4	15	0.22571	0.5053	0.999997	408	5	-0.082016	0.37799	0.67614	0.957587	944	4	-0.082016
NonTargeting_Human_0501	1	0.22581	0.22565	0.999997	409	1	-0.46219	0.77419	0.77463	0.968808	1495	0	-0.46219
NonTargeting_Human_0149	1	0.22687	0.22677	0.999997	410	1	-0.42315	0.77313	0.77363	0.968808	1494	0	-0.42315
GTF2A2	15	0.22698	0.50704	0.999997	411	4	-0.081753	0.17404	0.4402	0.891906	529	5	-0.081753
NonTargeting_Human_0782	1	0.22704	0.22698	0.999997	412	1	-0.87327	0.77296	0.77347	0.968808	1493	0	-0.87327
NonTargeting_Human_0504	1	0.2272	0.22713	0.999997	413	1	-0.55836	0.7728	0.7733	0.968808	1492	0	-0.55836
NonTargeting_Human_0279	1	0.22728	0.22724	0.999997	414	1	-0.50315	0.77272	0.77323	0.968808	1491	0	-0.50315
EML4	15	0.22753	0.50787	0.999997	415	6	0.025366	0.21282	0.49339	0.905076	616	4	0.025366
NonTargeting_Human_0882	1	0.22761	0.22757	0.999997	416	1	-0.76808	0.77239	0.77292	0.968808	1489	0	-0.76808
NonTargeting_Human_0258	1	0.22819	0.22826	0.999997	417	1	-0.50134	0.77181	0.77233	0.968808	1488	0	-0.50134
NonTargeting_Human_0129	1	0.22958	0.2296	0.999997	418	1	-0.62323	0.77042	0.77087	0.968808	1486	0	-0.62323
NonTargeting_Human_0975	1	0.23179	0.23176	0.999997	419	1	-0.37408	0.76821	0.76876	0.968808	1485	0	-0.37408
RNF151	15	0.2324	0.51456	0.999997	420	4	0.37106	0.018093	0.08719	0.793132	107	9	0.37106
NonTargeting_Human_0296	1	0.23425	0.23431	0.999997	421	1	-0.35539	0.76575	0.76613	0.968808	1484	0	-0.35539
NonTargeting_Human_0723	1	0.23483	0.23476	0.999997	422	1	-0.66777	0.76517	0.76546	0.968808	1483	0	-0.66777
NonTargeting_Human_0414	1	0.23532	0.23524	0.999997	423	1	-0.36852	0.76468	0.76494	0.968808	1482	0	-0.36852
CNTN6	15	0.23607	0.51966	0.999997	424	6	0.103	0.25269	0.54567	0.921006	703	5	0.103
NonTargeting_Human_0431	1	0.23647	0.23643	0.999997	425	1	-0.58907	0.76353	0.76377	0.968808	1481	0	-0.58907
HIST1H2BB	15	0.2372	0.52144	0.999997	426	6	-0.20362	0.12329	0.3527	0.869083	409	4	-0.20362
NonTargeting_Human_0265	1	0.23819	0.23811	0.999997	427	1	-0.37812	0.76181	0.76214	0.968808	1479	0	-0.37812
SLC26A4	15	0.2385	0.5232	0.999997	428	5	-0.23559	0.95059	0.97948	0.999997	1677	2	-0.23559
RTBDN	15	0.23879	0.52355	0.999997	429	6	-0.27452	0.79526	0.92639	0.999997	1523	2	-0.27452
YPEL1	15	0.23902	0.52391	0.999997	430	5	-0.1529	0.6336	0.85308	0.98952	1318	3	-0.1529
NonTargeting_Human_0055	1	0.23918	0.23906	0.999997	431	1	-0.35451	0.76082	0.7612	0.968808	1478	0	-0.35451
NonTargeting_Human_0009	1	0.23967	0.23954	0.999997	432	1	-0.4839	0.76033	0.7607	0.968808	1477	0	-0.4839
NonTargeting_Human_0052	1	0.24041	0.24036	0.999997	433	1	-0.43329	0.75959	0.76001	0.968808	1476	0	-0.43329
NonTargeting_Human_0099	1	0.24188	0.24183	0.999997	434	1	-0.56728	0.75812	0.7585	0.968808	1475	0	-0.56728
NonTargeting_Human_0022	1	0.24205	0.24201	0.999997	435	1	-0.48479	0.75795	0.75838	0.968808	1474	0	-0.48479
TPI1	15	0.24221	0.52853	0.999997	436	6	-0.13478	0.89788	0.96574	0.999997	1627	2	-0.13478
hsa-mir-7973-1	4	0.24223	0.36339	0.999997	437	2	-0.68387	0.89644	0.8966	0.999997	1624	0	-0.68387
MED27	15	0.24248	0.52885	0.999997	438	5	0.36932	0.023005	0.10497	0.803055	127	7	0.36932
NonTargeting_Human_0275	1	0.24262	0.2425	0.999997	439	1	-0.61754	0.75738	0.75783	0.968808	1473	0	-0.61754
NonTargeting_Human_0889	1	0.24295	0.24284	0.999997	440	1	-0.50407	0.75705	0.75749	0.968808	1472	0	-0.50407
NonTargeting_Human_0579	1	0.24336	0.24333	0.999997	441	1	-0.42461	0.75664	0.75706	0.968808	1471	0	-0.42461
KDM8	15	0.24404	0.53097	0.999997	442	6	-0.32491	0.99195	0.99315	0.999997	1719	1	-0.32491
NonTargeting_Human_0377	1	0.24574	0.24572	0.999997	443	1	-0.50666	0.75426	0.75465	0.968808	1469	0	-0.50666
KCNU1	15	0.24611	0.5339	0.999997	444	6	-0.24864	0.11032	0.32661	0.865285	381	6	-0.24864
NonTargeting_Human_0915	1	0.24672	0.2467	0.999997	445	1	-0.39882	0.75328	0.75364	0.968808	1467	0	-0.39882
NonTargeting_Human_0673	1	0.24746	0.2475	0.999997	446	1	-0.29013	0.75254	0.75291	0.968808	1466	0	-0.29013
NonTargeting_Human_0610	1	0.24803	0.24802	0.999997	447	1	-0.45893	0.75197	0.75231	0.968808	1465	0	-0.45893
NonTargeting_Human_0483	1	0.24852	0.2485	0.999997	448	1	-0.73143	0.75148	0.75174	0.968808	1464	0	-0.73143
NonTargeting_Human_0127	1	0.25	0.24987	0.999997	449	1	-0.44021	0.75	0.75025	0.968808	1463	0	-0.44021
EPAS1	15	0.25081	0.53952	0.999997	450	2	0.033734	0.29045	0.59288	0.935782	778	5	0.033734
NonTargeting_Human_0899	1	0.25205	0.25192	0.999997	451	1	-0.59927	0.74795	0.7483	0.968808	1462	0	-0.59927
NonTargeting_Human_0623	1	0.25246	0.25229	0.999997	452	1	-0.3864	0.74754	0.74804	0.968808	1461	0	-0.3864
NonTargeting_Human_0102	1	0.25254	0.25236	0.999997	453	1	-0.4077	0.74746	0.74796	0.968808	1460	0	-0.4077
NonTargeting_Human_0654	1	0.25402	0.25386	0.999997	454	1	-0.3645	0.74598	0.74646	0.968808	1459	0	-0.3645
NonTargeting_Human_0159	1	0.25467	0.25449	0.999997	455	1	-0.75169	0.74533	0.74582	0.968808	1457	0	-0.75169
GPR52	15	0.25549	0.54446	0.999997	456	5	0.07099	0.10173	0.3091	0.858624	356	6	0.07099
NonTargeting_Human_0464	1	0.25615	0.25596	0.999997	457	1	-0.53912	0.74385	0.74422	0.968808	1455	0	-0.53912
KLHDC7B	15	0.25789	0.54694	0.999997	458	5	0.12803	0.12547	0.35695	0.869083	414	6	0.12803
NonTargeting_Human_0320	1	0.25927	0.25923	0.999997	459	1	-0.60085	0.74073	0.74118	0.968808	1453	0	-0.60085
CPSF4	15	0.25968	0.54882	0.999997	460	5	-0.34517	0.51719	0.78953	0.970431	1166	2	-0.34517
CCDC178	15	0.25998	0.54916	0.999997	461	4	-0.17482	0.72173	0.89939	0.999997	1429	4	-0.17482
NonTargeting_Human_0847	1	0.26009	0.25993	0.999997	462	1	-0.36849	0.73991	0.74031	0.968808	1452	0	-0.36849
MRPL21	15	0.26015	0.54942	0.999997	463	3	0.19865	0.060172	0.21817	0.838356	240	7	0.19865
CWC22	15	0.26108	0.55038	0.999997	464	5	-0.19477	0.26293	0.55899	0.926051	722	3	-0.19477
USO1	15	0.26147	0.55082	0.999997	465	5	-0.30177	0.12002	0.346	0.869083	405	2	-0.30177
NonTargeting_Human_0260	1	0.26222	0.26207	0.999997	466	1	-0.3874	0.73778	0.73821	0.968808	1450	0	-0.3874
NonTargeting_Human_0419	1	0.26238	0.26222	0.999997	467	1	-0.55962	0.73762	0.73803	0.968808	1449	0	-0.55962
NonTargeting_Human_0685	1	0.26271	0.26261	0.999997	468	1	-0.73631	0.73729	0.73767	0.968808	1448	0	-0.73631
SLC35F5	15	0.26404	0.55337	0.999997	469	4	-0.12523	0.15221	0.4079	0.875783	478	5	-0.12523
NonTargeting_Human_0662	1	0.26509	0.26515	0.999997	470	1	-0.39803	0.73491	0.73524	0.968255	1447	0	-0.39803
PIAS1	15	0.26577	0.55522	0.999997	471	4	-0.31043	0.50397	0.77905	0.968808	1143	3	-0.31043
NonTargeting_Human_0776	1	0.26739	0.26739	0.999997	472	1	-0.25673	0.73261	0.7329	0.966799	1444	0	-0.25673
PSMD9	15	0.26938	0.5589	0.999997	473	3	0.22325	0.35729	0.65861	0.953192	900	5	0.22325
NonTargeting_Human_0834	1	0.27026	0.27016	0.999997	474	1	-0.4314	0.72974	0.73005	0.965555	1442	0	-0.4314
NonTargeting_Human_0280	1	0.27091	0.27086	0.999997	475	1	-0.41697	0.72909	0.72947	0.965555	1441	0	-0.41697
NonTargeting_Human_0598	1	0.27099	0.27097	0.999997	476	1	-0.54477	0.72901	0.72938	0.965555	1440	0	-0.54477
NonTargeting_Human_0933	1	0.27108	0.27105	0.999997	477	1	-0.28661	0.72892	0.72928	0.965555	1439	0	-0.28661
NonTargeting_Human_0772	1	0.27206	0.27204	0.999997	478	1	-0.62666	0.72794	0.72838	0.965555	1438	0	-0.62666
NonTargeting_Human_0553	1	0.27239	0.27233	0.999997	479	1	-0.34361	0.72761	0.72805	0.965555	1437	0	-0.34361
NonTargeting_Human_0762	1	0.27304	0.2729	0.999997	480	1	-0.33033	0.72696	0.72741	0.965555	1436	0	-0.33033
NonTargeting_Human_0822	1	0.27444	0.27429	0.999997	481	1	-0.46015	0.72556	0.72606	0.965555	1435	0	-0.46015
NonTargeting_Human_0030	1	0.27505	0.27496	0.999997	482	1	-0.43774	0.72495	0.72548	0.965555	1434	0	-0.43774
NonTargeting_Human_0049	1	0.27559	0.27553	0.999997	483	1	-0.4756	0.72441	0.72482	0.965555	1433	0	-0.4756
MORC3	15	0.27676	0.5665	0.999997	484	5	-0.11678	0.65104	0.86221	0.992115	1333	4	-0.11678
ZG16B	15	0.27702	0.56677	0.999997	485	2	-0.052931	0.71177	0.89432	0.999997	1413	2	-0.052931
NonTargeting_Human_0535	1	0.27714	0.27706	0.999997	486	1	-0.45779	0.72286	0.72328	0.965555	1432	0	-0.45779
NonTargeting_Human_0387	1	0.27747	0.27732	0.999997	487	1	-0.51283	0.72253	0.72294	0.965555	1431	0	-0.51283
NonTargeting_Human_0028	1	0.27788	0.27767	0.999997	488	1	-0.30567	0.72212	0.72254	0.965555	1430	0	-0.30567
KRTAP4-2	15	0.27842	0.56808	0.999997	489	3	0.25313	0.09734	0.30011	0.856347	347	6	0.25313
NonTargeting_Human_0800	1	0.2787	0.27851	0.999997	490	1	-0.5094	0.7213	0.72154	0.965555	1427	0	-0.5094
NXF5	15	0.27913	0.56895	0.999997	491	4	-0.094703	0.32953	0.6345	0.944481	848	3	-0.094703
NUDT21	15	0.28032	0.57005	0.999997	492	3	0.49788	0.016306	0.07981	0.793132	102	9	0.49788
HSPE1	15	0.28077	0.57052	0.999997	493	4	0.40304	0.0036391	0.022642	0.681238	42	7	0.40304
NonTargeting_Human_0474	1	0.28133	0.28099	0.999997	494	1	-0.49054	0.71867	0.71895	0.965555	1426	0	-0.49054
CDC23	15	0.28332	0.57327	0.999997	495	5	-0.27501	0.66637	0.87025	0.993923	1352	2	-0.27501
NonTargeting_Human_0317	1	0.28362	0.28316	0.999997	496	1	-0.25726	0.71638	0.71676	0.965555	1424	0	-0.25726
NonTargeting_Human_0329	1	0.28428	0.28388	0.999997	497	1	-0.31909	0.71572	0.71602	0.965555	1422	0	-0.31909
NonTargeting_Human_0566	1	0.28444	0.28402	0.999997	498	1	-0.39808	0.71556	0.71581	0.965555	1420	0	-0.39808
NonTargeting_Human_0178	1	0.28461	0.28416	0.999997	499	1	-0.31814	0.71539	0.71568	0.965555	1419	0	-0.31814
UVRAG	15	0.2849	0.57481	0.999997	500	5	-0.14661	0.30874	0.61477	0.941213	814	3	-0.14661
NonTargeting_Human_0078	1	0.28494	0.28449	0.999997	501	1	-0.40504	0.71506	0.71532	0.965555	1418	0	-0.40504
UHRF2	15	0.28511	0.57497	0.999997	502	5	-0.097342	0.017991	0.086755	0.793132	106	3	-0.097342
UBA3	15	0.28545	0.57532	0.999997	503	5	0.18924	0.058788	0.21406	0.834289	237	5	0.18924
PDE1A	15	0.28573	0.57563	0.999997	504	2	0.20344	0.07131	0.24378	0.838356	269	6	0.20344
NonTargeting_Human_0130	1	0.28584	0.28542	0.999997	505	1	-0.50278	0.71416	0.71443	0.965555	1417	0	-0.50278
NonTargeting_Human_0334	1	0.28666	0.28628	0.999997	506	1	-0.43881	0.71334	0.7136	0.965555	1416	0	-0.43881
NonTargeting_Human_0947	1	0.28756	0.28724	0.999997	507	1	-0.5343	0.71244	0.71263	0.965555	1414	0	-0.5343
NonTargeting_Human_0366	1	0.2883	0.28801	0.999997	508	1	-0.40683	0.7117	0.7119	0.965555	1412	0	-0.40683
C10orf53	15	0.29004	0.57982	0.999997	509	5	0.053244	0.16933	0.43374	0.889402	517	6	0.053244
PGA3	15	0.29021	0.58	0.999997	510	2	0.13287	0.010405	0.054746	0.757798	79	3	0.13287
SYP	15	0.2908	0.58052	0.999997	511	5	-0.13493	0.83111	0.93952	0.999997	1557	2	-0.13493
NonTargeting_Human_0761	1	0.29191	0.2916	0.999997	512	0	-0.3887	0.70809	0.70821	0.963096	1409	0	-0.3887
OSTC	15	0.29251	0.58213	0.999997	513	4	0.032475	0.18635	0.45738	0.899351	556	5	0.032475
NonTargeting_Human_0140	1	0.29281	0.29245	0.999997	514	0	-0.23911	0.70719	0.70732	0.963096	1408	0	-0.23911
NonTargeting_Human_0350	1	0.29322	0.29287	0.999997	515	0	-0.42814	0.70678	0.70697	0.963096	1407	0	-0.42814
NonTargeting_Human_0818	1	0.29363	0.29328	0.999997	516	0	-0.32391	0.70637	0.70658	0.963096	1406	0	-0.32391
NonTargeting_Human_0912	1	0.29584	0.29587	0.999997	517	0	-0.3308	0.70416	0.70459	0.963096	1405	0	-0.3308
NonTargeting_Human_0368	1	0.29797	0.29793	0.999997	518	0	-0.34304	0.70203	0.70249	0.962343	1404	0	-0.34304
NonTargeting_Human_0217	1	0.3006	0.30053	0.999997	519	0	-0.2961	0.6994	0.6998	0.960105	1403	0	-0.2961
NonTargeting_Human_0869	1	0.30101	0.30091	0.999997	520	0	-0.38751	0.69899	0.69946	0.960105	1401	0	-0.38751
NonTargeting_Human_0392	1	0.30183	0.30176	0.999997	521	0	-0.24903	0.69817	0.69859	0.959942	1400	0	-0.24903
NonTargeting_Human_0592	1	0.30199	0.30192	0.999997	522	0	-0.21537	0.69801	0.69843	0.959942	1399	0	-0.21537
NonTargeting_Human_0819	1	0.30257	0.30241	0.999997	523	0	-0.2259	0.69743	0.69785	0.959942	1397	0	-0.2259
NonTargeting_Human_0897	1	0.30273	0.30254	0.999997	524	0	-0.32748	0.69727	0.69767	0.959942	1396	0	-0.32748
GTF3A	15	0.30275	0.59209	0.999997	525	5	-0.24257	0.9837	0.99028	0.999997	1709	1	-0.24257
NonTargeting_Human_0517	1	0.30421	0.30397	0.999997	526	0	-0.39929	0.69579	0.69621	0.959691	1394	0	-0.39929
NonTargeting_Human_0407	1	0.30552	0.30518	0.999997	527	0	-0.33186	0.69448	0.69485	0.95856	1392	0	-0.33186
PPP1CB	15	0.30605	0.59572	0.999997	528	5	0.1867	0.21045	0.49005	0.904583	605	6	0.1867
ATP13A1	15	0.30612	0.59578	0.999997	529	1	0.1308	0.21152	0.49153	0.904583	609	6	0.1308
NonTargeting_Human_0109	1	0.30683	0.30642	0.999997	530	0	-0.21453	0.69317	0.69369	0.958471	1391	0	-0.21453
IRS1	15	0.30705	0.59661	0.999997	531	4	-0.07827	0.084433	0.27248	0.854265	305	3	-0.07827
NonTargeting_Human_0441	1	0.30814	0.30763	0.999997	532	0	-0.45568	0.69186	0.6925	0.957587	1390	0	-0.45568
NonTargeting_Human_0611	1	0.30831	0.30775	0.999997	533	0	-0.30061	0.69169	0.69233	0.957587	1389	0	-0.30061
NonTargeting_Human_0951	1	0.30864	0.30804	0.999997	534	0	-0.48723	0.69136	0.69202	0.957587	1387	0	-0.48723
ZW10	15	0.30882	0.5984	0.999997	535	5	0.2109	0.13243	0.37126	0.869083	435	6	0.2109
NonTargeting_Human_0577	1	0.30896	0.30834	0.999997	536	0	-0.47183	0.69104	0.69168	0.957587	1386	0	-0.47183
NonTargeting_Human_0007	1	0.30978	0.30923	0.999997	537	0	-0.31024	0.69022	0.69093	0.957587	1385	0	-0.31024
GIGYF2	15	0.31	0.59964	0.999997	538	5	-0.075885	0.67577	0.87516	0.994751	1361	4	-0.075885
RPL23A	15	0.31048	0.60006	0.999997	539	3	0.2316	0.0072927	0.040754	0.724422	66	6	0.2316
NonTargeting_Human_0462	1	0.31126	0.31073	0.999997	540	0	-0.42903	0.68874	0.68927	0.957587	1384	0	-0.42903
NonTargeting_Human_0494	1	0.31142	0.31091	0.999997	541	0	-0.3346	0.68858	0.6891	0.957587	1383	0	-0.3346
NonTargeting_Human_0154	1	0.31216	0.31169	0.999997	542	0	-0.33801	0.68784	0.68842	0.957587	1382	0	-0.33801
NLRP8	15	0.31221	0.6018	0.999997	543	4	0.29854	0.021432	0.099691	0.793132	119	7	0.29854
NonTargeting_Human_0466	1	0.31315	0.31265	0.999997	544	0	-0.37374	0.68685	0.68747	0.957587	1381	0	-0.37374
NonTargeting_Human_0199	1	0.31356	0.31307	0.999997	545	0	-0.4233	0.68644	0.68716	0.957587	1380	0	-0.4233
NID1	15	0.31408	0.60387	0.999997	546	3	0.06221	0.49275	0.77028	0.968808	1122	4	0.06221
ATP6V1B1	15	0.3148	0.60458	0.999997	547	4	0.30131	0.038899	0.15572	0.834289	167	8	0.30131
ALG8	15	0.31481	0.60461	0.999997	548	4	0.085805	0.56127	0.81381	0.976849	1218	4	0.085805
NonTargeting_Human_0385	1	0.31487	0.31426	0.999997	549	0	-0.32812	0.68513	0.68586	0.957587	1378	0	-0.32812
NonTargeting_Human_0530	1	0.31503	0.31442	0.999997	550	0	-0.19682	0.68497	0.68566	0.957587	1377	0	-0.19682
NonTargeting_Human_0147	1	0.3161	0.31551	0.999997	551	0	-0.4845	0.6839	0.68464	0.957587	1376	0	-0.4845
SLC12A9	15	0.31666	0.60647	0.999997	552	3	-0.26231	0.8799	0.95949	0.999997	1607	3	-0.26231
NonTargeting_Human_0739	1	0.31725	0.31659	0.999997	553	0	-0.39921	0.68275	0.68336	0.957587	1374	0	-0.39921
NonTargeting_Human_0264	1	0.31856	0.31797	0.999997	554	0	-0.44378	0.68144	0.68208	0.957587	1372	0	-0.44378
NonTargeting_Human_0724	1	0.31995	0.31952	0.999997	555	0	-0.4871	0.68005	0.68072	0.957587	1371	0	-0.4871
PRPF6	15	0.31998	0.60963	0.999997	556	4	0.30467	0.26221	0.55818	0.926051	720	6	0.30467
NonTargeting_Human_0755	1	0.32094	0.32054	0.999997	557	0	-0.37123	0.67906	0.67959	0.957587	1370	0	-0.37123
NonTargeting_Human_0153	1	0.32102	0.32064	0.999997	558	0	-0.19259	0.67898	0.67949	0.957587	1369	0	-0.19259
NonTargeting_Human_0463	1	0.32118	0.32077	0.999997	559	0	-0.28299	0.67882	0.67934	0.957587	1368	0	-0.28299
NonTargeting_Human_0619	1	0.32135	0.32097	0.999997	560	0	-0.33339	0.67865	0.67921	0.957587	1367	0	-0.33339
NonTargeting_Human_0813	1	0.32249	0.32208	0.999997	561	0	-0.344	0.67751	0.67808	0.957587	1366	0	-0.344
SAP130	15	0.32251	0.61206	0.999997	562	4	-0.11543	0.35607	0.65741	0.953192	899	3	-0.11543
NonTargeting_Human_0657	1	0.32323	0.32283	0.999997	563	0	-0.29467	0.67677	0.67731	0.957587	1365	0	-0.29467
TRA2B	15	0.32595	0.61566	0.999997	564	5	-0.37281	0.018898	0.090632	0.793132	112	2	-0.37281
NonTargeting_Human_0362	1	0.32709	0.32658	0.999997	565	0	-0.30584	0.67291	0.67371	0.955734	1358	0	-0.30584
C12orf43	15	0.32809	0.61779	0.999997	566	3	0.058576	0.30095	0.60536	0.939157	800	3	0.058576
ICA1L	15	0.32877	0.61852	0.999997	567	5	-0.19569	0.72976	0.90357	0.999997	1443	3	-0.19569
NonTargeting_Human_0184	1	0.32897	0.32849	0.999997	568	0	-0.45089	0.67103	0.67199	0.954078	1357	0	-0.45089
NonTargeting_Human_0831	1	0.32938	0.32892	0.999997	569	0	-0.31052	0.67062	0.6716	0.954078	1356	0	-0.31052
NonTargeting_Human_0938	1	0.33086	0.33041	0.999997	570	0	-0.24052	0.66914	0.67026	0.953933	1355	0	-0.24052
NonTargeting_Human_0044	1	0.33299	0.33252	0.999997	571	0	-0.19133	0.66701	0.6681	0.953192	1354	0	-0.19133
NonTargeting_Human_0949	1	0.33324	0.33276	0.999997	572	0	-0.43489	0.66676	0.66782	0.953192	1353	0	-0.43489
NonTargeting_Human_0593	1	0.33406	0.33366	0.999997	573	0	-0.28637	0.66594	0.66692	0.953192	1351	0	-0.28637
OLR1	15	0.33443	0.62395	0.999997	574	4	0.11093	0.13303	0.37244	0.869083	438	4	0.11093
PES1	15	0.3349	0.62436	0.999997	575	4	-0.073047	0.75425	0.91241	0.999997	1468	3	-0.073047
NonTargeting_Human_0107	1	0.33537	0.33508	0.999997	576	0	-0.17418	0.66463	0.66562	0.953192	1350	0	-0.17418
NonTargeting_Human_0402	1	0.33562	0.33531	0.999997	577	0	-0.26717	0.66438	0.66539	0.953192	1349	0	-0.26717
NonTargeting_Human_0442	1	0.33676	0.33664	0.999997	578	0	-0.25015	0.66324	0.66427	0.953192	1348	0	-0.25015
hsa-mir-6515	13	0.33742	0.61487	0.999997	579	3	0.12927	0.3549	0.64258	0.948881	897	5	0.12927
EIF3C	15	0.3382	0.62752	0.999997	580	2	0.037642	0.0022413	0.014476	0.681238	29	4	0.037642
NonTargeting_Human_0475	1	0.33865	0.33864	0.999997	581	0	-0.28542	0.66135	0.6623	0.953192	1347	0	-0.28542
NonTargeting_Human_0924	1	0.3389	0.33886	0.999997	582	0	-0.3086	0.6611	0.662	0.953192	1346	0	-0.3086
BST2	15	0.33947	0.62871	0.999997	583	4	-0.09475	0.3274	0.63253	0.944188	845	5	-0.09475
NonTargeting_Human_0119	1	0.33955	0.33946	0.999997	584	0	-0.24094	0.66045	0.66146	0.953192	1345	0	-0.24094
NonTargeting_Human_0513	1	0.34013	0.34002	0.999997	585	0	-0.25771	0.65987	0.661	0.953192	1344	0	-0.25771
ARPC5L	15	0.34135	0.63067	0.999997	586	4	0.27833	0.12361	0.35339	0.869083	410	6	0.27833
NonTargeting_Human_0167	1	0.34185	0.34193	0.999997	587	0	-0.30355	0.65815	0.65949	0.953192	1342	0	-0.30355
NonTargeting_Human_0939	1	0.34357	0.34393	0.999997	588	0	-0.39795	0.65643	0.6579	0.953192	1341	0	-0.39795
NonTargeting_Human_0954	1	0.34439	0.34476	0.999997	589	0	-0.21144	0.65561	0.65708	0.953192	1340	0	-0.21144
NonTargeting_Human_0187	1	0.34455	0.34489	0.999997	590	0	-0.34983	0.65545	0.65689	0.953192	1339	0	-0.34983
LAS1L	15	0.34474	0.63388	0.999997	591	5	0.27297	0.052915	0.19713	0.834289	213	7	0.27297
PACRGL	15	0.3453	0.63443	0.999997	592	5	0.074976	0.18557	0.45644	0.899351	554	5	0.074976
ANXA13	15	0.34631	0.63555	0.999997	593	5	-0.066649	0.4999	0.77592	0.968808	1136	4	-0.066649
NonTargeting_Human_0002	1	0.34701	0.3471	0.999997	594	0	-0.24611	0.65299	0.65434	0.952366	1337	0	-0.24611
NonTargeting_Human_0143	1	0.34767	0.34775	0.999997	595	0	-0.26463	0.65233	0.65375	0.952366	1335	0	-0.26463
EXOC2	15	0.34776	0.63696	0.999997	596	5	-0.16969	0.68276	0.87882	0.996568	1375	1	-0.16969
NonTargeting_Human_0313	1	0.3489	0.34894	0.999997	597	0	-0.15631	0.6511	0.65257	0.952366	1334	0	-0.15631
NonTargeting_Human_0341	1	0.35038	0.35044	0.999997	598	0	-0.17665	0.64962	0.65117	0.952293	1332	0	-0.17665
POLR1B	15	0.35105	0.64018	0.999997	599	4	-0.18883	0.30173	0.60627	0.939157	801	5	-0.18883
LYZ	15	0.35188	0.64093	0.999997	600	2	0.26046	0.048813	0.18501	0.834289	196	7	0.26046
NonTargeting_Human_0982	1	0.35218	0.35232	0.999997	601	0	-0.37061	0.64782	0.64938	0.952293	1331	0	-0.37061
S100A10	15	0.35223	0.64133	0.999997	602	5	-0.15683	0.69718	0.88645	0.997708	1395	3	-0.15683
NonTargeting_Human_0471	1	0.35366	0.35381	0.999997	603	0	-0.2302	0.64634	0.64785	0.952202	1329	0	-0.2302
NonTargeting_Human_0964	1	0.35415	0.35427	0.999997	604	0	-0.3634	0.64585	0.64731	0.952202	1328	0	-0.3634
NAA10	15	0.35418	0.64325	0.999997	605	5	-0.14953	0.29381	0.59674	0.937053	784	6	-0.14953
NonTargeting_Human_0905	1	0.3544	0.35454	0.999997	606	0	-0.27339	0.6456	0.64705	0.952202	1327	0	-0.27339
G6PC	15	0.35585	0.64484	0.999997	607	5	0.21595	0.18243	0.45204	0.899351	545	4	0.21595
HNRNPA2B1	15	0.35821	0.6472	0.999997	608	5	-0.093714	0.84891	0.94669	0.999997	1575	2	-0.093714
CDC14A	15	0.35822	0.64721	0.999997	609	4	0.26549	0.25661	0.55097	0.922469	709	5	0.26549
NonTargeting_Human_0547	1	0.35841	0.35836	0.999997	610	0	-0.31726	0.64159	0.64288	0.948881	1325	0	-0.31726
DDX27	15	0.35863	0.64768	0.999997	611	5	-0.17217	0.16996	0.43466	0.889402	518	4	-0.17217
NonTargeting_Human_0114	1	0.35874	0.35873	0.999997	612	0	-0.28827	0.64126	0.64257	0.948881	1323	0	-0.28827
NonTargeting_Human_0133	1	0.36055	0.36048	0.999997	613	0	-0.22401	0.63945	0.64076	0.948881	1322	0	-0.22401
NonTargeting_Human_0788	1	0.36145	0.36129	0.999997	614	0	-0.21218	0.63855	0.63975	0.948799	1321	0	-0.21218
CAPZA1	15	0.36246	0.65141	0.999997	615	2	0.32308	0.058574	0.21344	0.834289	235	8	0.32308
NonTargeting_Human_0527	1	0.36276	0.36257	0.999997	616	0	-0.15461	0.63724	0.63848	0.948402	1320	0	-0.15461
TADA2A	15	0.3644	0.65331	0.999997	617	2	0.60293	0.0014622	0.0099716	0.602424	24	8	0.60293
NonTargeting_Human_0416	1	0.3662	0.36614	0.999997	618	0	-0.19591	0.6338	0.63505	0.944481	1319	0	-0.19591
NonTargeting_Human_0789	1	0.36801	0.36802	0.999997	619	0	-0.31022	0.63199	0.6332	0.944188	1316	0	-0.31022
NonTargeting_Human_0426	1	0.36842	0.36842	0.999997	620	0	-0.20254	0.63158	0.63278	0.944188	1315	0	-0.20254
NonTargeting_Human_0729	1	0.36981	0.36983	0.999997	621	0	-0.17485	0.63019	0.63139	0.944188	1312	0	-0.17485
NonTargeting_Human_0991	1	0.37137	0.37127	0.999997	622	0	-0.1341	0.62863	0.6296	0.944188	1311	0	-0.1341
NonTargeting_Human_0040	1	0.37154	0.37145	0.999997	623	0	-0.20909	0.62846	0.62946	0.944188	1310	0	-0.20909
NonTargeting_Human_0920	1	0.37342	0.37344	0.999997	624	0	-0.23166	0.62658	0.62756	0.94376	1309	0	-0.23166
NonTargeting_Human_0060	1	0.37449	0.37462	0.999997	625	0	-0.1758	0.62551	0.62639	0.94281	1307	0	-0.1758
KIAA1033	15	0.37454	0.6631	0.999997	626	4	0.054763	0.73865	0.90739	0.999997	1451	3	0.054763
NonTargeting_Human_0873	1	0.37482	0.3749	0.999997	627	0	-0.12012	0.62518	0.62604	0.94281	1306	0	-0.12012
NonTargeting_Human_0445	1	0.37588	0.376	0.999997	628	0	-0.28495	0.62412	0.625	0.942345	1305	0	-0.28495
NonTargeting_Human_0404	1	0.37736	0.37739	0.999997	629	0	-0.22158	0.62264	0.62337	0.941503	1303	0	-0.22158
METAP1D	15	0.37766	0.66603	0.999997	630	5	0.063431	0.44715	0.73338	0.966799	1050	4	0.063431
NonTargeting_Human_0012	1	0.3781	0.37813	0.999997	631	0	-0.22599	0.6219	0.62264	0.941213	1301	0	-0.22599
NonTargeting_Human_0336	1	0.37851	0.37854	0.999997	632	0	-0.25336	0.62149	0.62228	0.941213	1300	0	-0.25336
NonTargeting_Human_0062	1	0.37883	0.37896	0.999997	633	0	-0.17881	0.62117	0.62186	0.941213	1299	0	-0.17881
NonTargeting_Human_0039	1	0.37908	0.37917	0.999997	634	0	-0.15257	0.62092	0.62165	0.941213	1298	0	-0.15257
ZFAND1	15	0.37914	0.66735	0.999997	635	4	0.10901	0.080788	0.26469	0.854265	295	6	0.10901
NonTargeting_Human_0406	1	0.37924	0.37935	0.999997	636	0	-0.17084	0.62076	0.62141	0.941213	1297	0	-0.17084
PGS1	15	0.38078	0.66895	0.999997	637	4	0.081229	0.14226	0.38948	0.87153	451	5	0.081229
NonTargeting_Human_0510	1	0.3808	0.381	0.999997	638	0	-0.14806	0.6192	0.61984	0.941213	1296	0	-0.14806
NonTargeting_Human_0919	1	0.38088	0.38109	0.999997	639	0	-0.23424	0.61912	0.61974	0.941213	1295	0	-0.23424
NonTargeting_Human_0378	1	0.38113	0.38138	0.999997	640	0	-0.18348	0.61887	0.61954	0.941213	1294	0	-0.18348
NonTargeting_Human_0101	1	0.38203	0.38239	0.999997	641	0	-0.13707	0.61797	0.61872	0.941213	1293	0	-0.13707
NonTargeting_Human_0095	1	0.38236	0.38274	0.999997	642	0	-0.15589	0.61764	0.61837	0.941213	1292	0	-0.15589
RICTOR	15	0.38315	0.67117	0.999997	643	4	0.031686	0.25362	0.54699	0.921006	704	5	0.031686
NonTargeting_Human_0348	1	0.38334	0.38368	0.999997	644	0	-0.18784	0.61666	0.61749	0.941213	1291	0	-0.18784
NonTargeting_Human_0372	1	0.38343	0.38375	0.999997	645	0	-0.17015	0.61657	0.61742	0.941213	1290	0	-0.17015
NonTargeting_Human_0185	1	0.3849	0.3852	0.999997	646	0	-0.15577	0.6151	0.61581	0.941213	1289	0	-0.15577
NDUFA13	15	0.3855	0.67307	0.999997	647	1	0.38513	0.02893	0.12427	0.825899	139	8	0.38513
RALA	15	0.38582	0.6734	0.999997	648	5	0.088629	0.047029	0.17993	0.834289	190	6	0.088629
NonTargeting_Human_0023	1	0.38597	0.38627	0.999997	649	0	-0.14438	0.61403	0.61473	0.941213	1288	0	-0.14438
NonTargeting_Human_0767	1	0.38744	0.38781	0.999997	650	0	-0.15173	0.61256	0.61321	0.941213	1287	0	-0.15173
NonTargeting_Human_0488	1	0.38892	0.38929	0.999997	651	0	-0.12873	0.61108	0.61174	0.941213	1286	0	-0.12873
NonTargeting_Human_0602	1	0.38933	0.38972	0.999997	652	0	-0.12687	0.61067	0.6113	0.941213	1285	0	-0.12687
C9orf41	15	0.38939	0.67692	0.999997	653	2	0.24814	0.18172	0.45097	0.899351	542	5	0.24814
NonTargeting_Human_0408	1	0.39138	0.39176	0.999997	654	0	-0.19653	0.60862	0.60935	0.940468	1283	0	-0.19653
BAGE2	15	0.39263	0.68007	0.999997	655	3	0.2505	0.42199	0.71307	0.965555	1011	4	0.2505
NonTargeting_Human_0671	1	0.39335	0.39369	0.999997	656	0	-0.22091	0.60665	0.60734	0.939157	1280	0	-0.22091
NonTargeting_Human_0236	1	0.39343	0.39375	0.999997	657	0	-0.23439	0.60657	0.60725	0.939157	1279	0	-0.23439
NonTargeting_Human_0797	1	0.3936	0.39391	0.999997	658	0	-0.17931	0.6064	0.60712	0.939157	1278	0	-0.17931
NonTargeting_Human_0641	1	0.39384	0.39418	0.999997	659	0	-0.2049	0.60616	0.60686	0.939157	1277	0	-0.2049
NonTargeting_Human_0034	1	0.39401	0.39435	0.999997	660	0	-0.19551	0.60599	0.60675	0.939157	1276	0	-0.19551
NOTCH2NL	15	0.39513	0.68235	0.999997	661	5	-0.23673	0.1496	0.40286	0.874764	469	4	-0.23673
NonTargeting_Human_0858	1	0.39565	0.39588	0.999997	662	0	-0.16711	0.60435	0.60518	0.939157	1272	0	-0.16711
NonTargeting_Human_0881	1	0.39597	0.39616	0.999997	663	0	-0.19711	0.60403	0.6048	0.939157	1271	0	-0.19711
NonTargeting_Human_0194	1	0.39614	0.39632	0.999997	664	0	-0.21499	0.60386	0.60462	0.939157	1270	0	-0.21499
SRCAP	15	0.39654	0.6837	0.999997	665	5	-0.033919	0.38001	0.67781	0.957587	952	1	-0.033919
BTF3	15	0.39788	0.685	0.999997	666	3	0.1172	0.21069	0.49041	0.904583	607	5	0.1172
NonTargeting_Human_0817	1	0.40024	0.40033	0.999997	667	0	-0.18374	0.59976	0.60033	0.939157	1267	0	-0.18374
NonTargeting_Human_0383	1	0.40065	0.4007	0.999997	668	0	-0.13539	0.59935	0.59982	0.939157	1266	0	-0.13539
NonTargeting_Human_0600	1	0.40335	0.4033	0.999997	669	0	-0.14001	0.59665	0.59704	0.937053	1265	0	-0.14001
NonTargeting_Human_0303	1	0.40458	0.40445	0.999997	670	0	-0.11617	0.59542	0.59579	0.937053	1263	0	-0.11617
NonTargeting_Human_0339	1	0.40467	0.40451	0.999997	671	0	-0.16071	0.59533	0.59571	0.937053	1262	0	-0.16071
ZNF213	15	0.40603	0.69245	0.999997	672	3	0.10292	0.057697	0.21094	0.834289	230	7	0.10292
hsa-mir-6770-1	10	0.40676	0.63901	0.999997	673	3	-0.24778	0.98119	0.9812	0.999997	1708	0	-0.24778
PPM1A	15	0.41002	0.69617	0.999997	674	1	0.59333	0.01265	0.064371	0.775699	88	8	0.59333
SVOP	15	0.41145	0.69768	0.999997	675	4	-0.11528	0.20043	0.47656	0.903837	589	3	-0.11528
BOLA2	15	0.41181	0.69799	0.999997	676	5	0.04721	0.045427	0.17537	0.834289	184	6	0.04721
NonTargeting_Human_0825	1	0.41188	0.41193	0.999997	677	0	-0.18145	0.58812	0.58852	0.931422	1259	0	-0.18145
NonTargeting_Human_0681	1	0.41246	0.41246	0.999997	678	0	-0.18831	0.58754	0.58804	0.931422	1258	0	-0.18831
WDHD1	15	0.41323	0.69935	0.999997	679	5	-0.05582	0.07303	0.24753	0.838356	276	5	-0.05582
NonTargeting_Human_0918	1	0.41361	0.41374	0.999997	680	0	-0.16729	0.58639	0.58689	0.930527	1257	0	-0.16729
NonTargeting_Human_0496	1	0.41402	0.41412	0.999997	681	0	-0.16038	0.58598	0.58645	0.930527	1256	0	-0.16038
NonTargeting_Human_0430	1	0.41697	0.41709	0.999997	682	0	-0.17215	0.58303	0.58351	0.926847	1254	0	-0.17215
NonTargeting_Human_0004	1	0.41771	0.41789	0.999997	683	0	-0.11483	0.58229	0.58278	0.926847	1253	0	-0.11483
NonTargeting_Human_0838	1	0.41803	0.41819	0.999997	684	0	-0.15895	0.58197	0.58247	0.926847	1252	0	-0.15895
AGPAT6	15	0.41808	0.70382	0.999997	685	4	-0.0040516	0.36972	0.66931	0.953357	928	5	-0.0040516
CCT8	15	0.41861	0.70433	0.999997	686	5	-0.19823	0.99706	0.99697	0.999997	1731	0	-0.19823
TMOD2	15	0.41898	0.70463	0.999997	687	3	0.28079	0.12267	0.35147	0.869083	408	7	0.28079
NonTargeting_Human_0792	1	0.41926	0.41955	0.999997	688	0	-0.12486	0.58074	0.5812	0.926847	1251	0	-0.12486
NonTargeting_Human_0542	1	0.41959	0.41984	0.999997	689	0	-0.16959	0.58041	0.58092	0.926847	1250	0	-0.16959
NonTargeting_Human_0412	1	0.42041	0.4206	0.999997	690	0	-0.095175	0.57959	0.58009	0.926847	1249	0	-0.095175
SERPINB5	15	0.42046	0.70599	0.999997	691	4	0.10958	0.41227	0.70489	0.963096	1000	4	0.10958
NonTargeting_Human_0228	1	0.42123	0.4214	0.999997	692	0	-0.098521	0.57877	0.57917	0.926665	1248	0	-0.098521
PHF3	15	0.42145	0.70693	0.999997	693	5	-0.079131	0.14161	0.38835	0.87153	450	4	-0.079131
NonTargeting_Human_0032	1	0.42164	0.42176	0.999997	694	0	-0.1314	0.57836	0.57874	0.926665	1247	0	-0.1314
NonTargeting_Human_0584	1	0.42254	0.42262	0.999997	695	0	-0.15501	0.57746	0.57772	0.926051	1246	0	-0.15501
HIST2H3A	15	0.42267	0.70797	0.999997	696	3	-0.071576	0.34693	0.64937	0.952293	878	3	-0.071576
NonTargeting_Human_0125	1	0.42295	0.42302	0.999997	697	0	-0.09301	0.57705	0.57727	0.926051	1244	0	-0.09301
FER	15	0.4236	0.70888	0.999997	698	4	0.03044	0.10306	0.3119	0.858624	358	5	0.03044
NonTargeting_Human_0638	1	0.42468	0.42464	0.999997	699	0	-0.1166	0.57532	0.57552	0.926051	1242	0	-0.1166
NonTargeting_Human_0468	1	0.42476	0.42473	0.999997	700	0	-0.090196	0.57524	0.57541	0.926051	1241	0	-0.090196
TMEM221	15	0.42514	0.7102	0.999997	701	5	-0.060348	0.094576	0.2943	0.856347	335	3	-0.060348
NonTargeting_Human_0390	1	0.42574	0.42564	0.999997	702	0	-0.13231	0.57426	0.57447	0.926051	1240	0	-0.13231
WDR61	15	0.42608	0.71105	0.999997	703	4	-0.054103	0.93507	0.9748	0.999997	1664	2	-0.054103
NonTargeting_Human_0076	1	0.4264	0.42628	0.999997	704	0	-0.1096	0.5736	0.5738	0.926051	1238	0	-0.1096
NonTargeting_Human_0874	1	0.42673	0.42662	0.999997	705	0	-0.13146	0.57327	0.5735	0.926051	1237	0	-0.13146
ANKRD35	15	0.42684	0.71168	0.999997	706	5	-0.21043	0.12022	0.34637	0.869083	406	2	-0.21043
VPS29	15	0.42707	0.71191	0.999997	707	4	0.065929	0.1904	0.46282	0.902958	565	6	0.065929
AKAP9	15	0.4274	0.71221	0.999997	708	5	-0.23363	0.34306	0.646	0.952202	868	2	-0.23363
NonTargeting_Human_0764	1	0.4282	0.42801	0.999997	709	0	-0.061098	0.5718	0.57197	0.926051	1235	0	-0.061098
NonTargeting_Human_0563	1	0.43025	0.43009	0.999997	710	0	-0.11787	0.56975	0.56998	0.926051	1232	0	-0.11787
EIF5A	15	0.43026	0.71493	0.999997	711	4	0.13408	0.11188	0.32976	0.86667	387	6	0.13408
C16orf62	15	0.4307	0.71534	0.999997	712	3	-0.068756	0.15079	0.40507	0.874764	473	3	-0.068756
NonTargeting_Human_0604	1	0.43148	0.43127	0.999997	713	0	-0.12509	0.56852	0.56866	0.926051	1230	0	-0.12509
MPDU1	15	0.43217	0.71671	0.999997	714	2	0.1658	0.18436	0.45469	0.899351	549	6	0.1658
NonTargeting_Human_0921	1	0.43279	0.43255	0.999997	715	0	-0.015248	0.56721	0.56733	0.926051	1229	0	-0.015248
hsa-mir-6817	13	0.4328	0.69389	0.999997	716	4	-0.24816	0.85636	0.94238	0.999997	1585	2	-0.24816
GINS2	15	0.4329	0.71732	0.999997	717	2	0.10171	0.17092	0.43588	0.889402	522	6	0.10171
NonTargeting_Human_0644	1	0.43304	0.43278	0.999997	718	0	-0.11604	0.56696	0.56712	0.926051	1228	0	-0.11604
NonTargeting_Human_0749	1	0.43386	0.43363	0.999997	719	0	-0.1153	0.56614	0.56633	0.926051	1227	0	-0.1153
MTFP1	15	0.43421	0.71876	0.999997	720	5	-0.19462	0.17067	0.43561	0.889402	521	5	-0.19462
FUNDC2	15	0.43478	0.71927	0.999997	721	4	0.073709	0.33457	0.63876	0.948402	855	5	0.073709
SORT1	15	0.43591	0.72022	0.999997	722	5	0.043355	0.144	0.3925	0.87153	456	5	0.043355
NonTargeting_Human_0917	1	0.43599	0.43579	0.999997	723	0	-0.07631	0.56401	0.56413	0.926051	1225	0	-0.07631
NonTargeting_Human_0692	1	0.43616	0.43601	0.999997	724	0	-0.11059	0.56384	0.56394	0.926051	1223	0	-0.11059
NonTargeting_Human_0005	1	0.43649	0.43627	0.999997	725	0	-0.064645	0.56351	0.56359	0.926051	1222	0	-0.064645
NonTargeting_Human_0731	1	0.43804	0.43787	0.999997	726	0	-0.10708	0.56196	0.56196	0.926051	1221	0	-0.10708
NonTargeting_Human_0748	1	0.43862	0.43842	0.999997	727	0	-0.12033	0.56138	0.56132	0.926051	1219	0	-0.12033
METTL14	15	0.43875	0.72263	0.999997	728	5	-0.25066	0.95608	0.98146	0.999997	1680	1	-0.25066
NonTargeting_Human_0491	1	0.44018	0.4399	0.999997	729	0	-0.1155	0.55982	0.55969	0.926051	1217	0	-0.1155
NonTargeting_Human_0499	1	0.44108	0.44079	0.999997	730	0	-0.084454	0.55892	0.5588	0.926051	1216	0	-0.084454
GCFC2	15	0.44153	0.72518	0.999997	731	1	0.18918	0.052194	0.19497	0.834289	206	5	0.18918
hsa-mir-3680-1	10	0.44157	0.66565	0.999997	732	2	-0.14294	0.56892	0.76873	0.968808	1231	3	-0.14294
NonTargeting_Human_0210	1	0.44264	0.44248	0.999997	733	0	-0.079518	0.55736	0.55725	0.926051	1215	0	-0.079518
NonTargeting_Human_0058	1	0.44387	0.4437	0.999997	734	0	-0.079573	0.55613	0.55597	0.926051	1214	0	-0.079573
NonTargeting_Human_0332	1	0.44788	0.44774	0.999997	735	0	-0.074631	0.55212	0.5518	0.922469	1213	0	-0.074631
NonTargeting_Human_0418	1	0.44797	0.44783	0.999997	736	0	-0.093941	0.55203	0.55169	0.922469	1212	0	-0.093941
RBM4B	15	0.44933	0.73138	0.999997	737	3	0.041018	0.47079	0.75227	0.968808	1078	4	0.041018
NonTargeting_Human_0393	1	0.4501	0.44988	0.999997	738	0	-0.066282	0.5499	0.54954	0.921327	1210	0	-0.066282
NonTargeting_Human_0936	1	0.45026	0.44998	0.999997	739	0	-0.084652	0.54974	0.54935	0.921327	1209	0	-0.084652
NonTargeting_Human_0100	1	0.45059	0.45028	0.999997	740	0	-0.083487	0.54941	0.54896	0.921327	1207	0	-0.083487
NonTargeting_Human_0104	1	0.45198	0.45179	0.999997	741	0	-0.054475	0.54802	0.54755	0.921006	1205	0	-0.054475
NonTargeting_Human_0651	1	0.45207	0.4519	0.999997	742	0	-0.048219	0.54793	0.54747	0.921006	1204	0	-0.048219
SSX4	15	0.45207	0.73308	0.999997	743	4	0.23263	0.047996	0.1827	0.834289	192	7	0.23263
NIPSNAP1	15	0.45348	0.73391	0.999997	744	4	0.049965	0.14908	0.40196	0.874764	467	5	0.049965
NonTargeting_Human_0420	1	0.45395	0.45366	0.999997	745	0	-0.078156	0.54605	0.54575	0.921006	1203	0	-0.078156
KIAA1328	15	0.45423	0.73442	0.999997	746	4	0.20093	0.07194	0.24512	0.838356	271	6	0.20093
NonTargeting_Human_0590	1	0.45518	0.45509	0.999997	747	0	-0.073346	0.54482	0.54425	0.921006	1202	0	-0.073346
NonTargeting_Human_0694	1	0.45682	0.45669	0.999997	748	0	-0.069557	0.54318	0.54255	0.921006	1201	0	-0.069557
SUSD5	15	0.45773	0.73661	0.999997	749	3	0.2556	0.13357	0.37353	0.869083	442	6	0.2556
TMEM87B	15	0.45804	0.73681	0.999997	750	3	0.61083	0.001591	0.010814	0.607828	25	10	0.61083
SDHAF1	15	0.46146	0.73875	0.999997	751	3	0.36221	0.016824	0.082082	0.793132	104	9	0.36221
STXBP5L	15	0.46162	0.73886	0.999997	752	4	0.15107	0.14495	0.3941	0.87153	459	7	0.15107
NonTargeting_Human_0454	1	0.46256	0.46249	0.999997	753	0	-0.050613	0.53744	0.53667	0.914633	1198	0	-0.050613
NonTargeting_Human_0479	1	0.46281	0.46273	0.999997	754	0	-0.062207	0.53719	0.53651	0.914633	1197	0	-0.062207
NSUN3	15	0.46319	0.73984	0.999997	755	3	0.32793	0.3047	0.6098	0.940468	809	4	0.32793
NonTargeting_Human_0482	1	0.46543	0.46542	0.999997	756	0	-0.049855	0.53457	0.53384	0.91306	1195	0	-0.049855
NonTargeting_Human_0290	1	0.46552	0.46548	0.999997	757	0	-0.043072	0.53448	0.53376	0.91306	1194	0	-0.043072
NonTargeting_Human_0227	1	0.46584	0.46578	0.999997	758	0	-0.052074	0.53416	0.53342	0.91306	1193	0	-0.052074
NonTargeting_Human_0142	1	0.46593	0.46582	0.999997	759	0	-0.040178	0.53407	0.53335	0.91306	1192	0	-0.040178
NonTargeting_Human_0374	1	0.46625	0.4661	0.999997	760	0	-0.035772	0.53375	0.53305	0.91306	1191	0	-0.035772
EBP	15	0.46738	0.74232	0.999997	761	3	0.19907	0.10743	0.32091	0.862265	372	7	0.19907
NonTargeting_Human_0307	1	0.46773	0.46747	0.999997	762	0	-0.047311	0.53227	0.53176	0.91306	1190	0	-0.047311
NonTargeting_Human_0111	1	0.46814	0.46789	0.999997	763	0	-0.031915	0.53186	0.53135	0.91306	1189	0	-0.031915
NonTargeting_Human_0826	1	0.46863	0.4684	0.999997	764	0	-0.041148	0.53137	0.53085	0.91306	1188	0	-0.041148
TOMM22	15	0.4693	0.74367	0.999997	765	4	-0.037941	0.53497	0.80025	0.970609	1196	4	-0.037941
NonTargeting_Human_0618	1	0.46994	0.46972	0.999997	766	0	-0.047111	0.53006	0.52962	0.91306	1187	0	-0.047111
NonTargeting_Human_0291	1	0.47117	0.47106	0.999997	767	0	-0.040191	0.52883	0.5283	0.91306	1186	0	-0.040191
SPDYE1	15	0.47145	0.74502	0.999997	768	4	-0.16866	0.86063	0.95147	0.999997	1588	2	-0.16866
NonTargeting_Human_0676	1	0.47265	0.47255	0.999997	769	0	-0.041396	0.52735	0.52695	0.91306	1183	0	-0.041396
SSR2	15	0.47267	0.74578	0.999997	770	4	0.25445	0.16894	0.43324	0.889402	514	6	0.25445
CERS6	15	0.47282	0.74584	0.999997	771	2	0.29976	0.03774	0.15211	0.834289	165	6	0.29976
DPY30	15	0.4735	0.74624	0.999997	772	1	0.055224	0.40021	0.69478	0.95856	983	5	0.055224
MRPS21	14	0.47403	0.7345	0.999997	773	4	-0.10016	0.18369	0.44551	0.896506	547	3	-0.10016
NonTargeting_Human_0273	1	0.47552	0.47535	0.999997	774	0	-0.030795	0.52448	0.5244	0.91306	1180	0	-0.030795
NonTargeting_Human_0907	1	0.47642	0.47627	0.999997	775	0	-0.030378	0.52358	0.52347	0.91306	1178	0	-0.030378
NonTargeting_Human_0064	1	0.47659	0.47647	0.999997	776	0	-0.032477	0.52341	0.52327	0.91306	1177	0	-0.032477
NonTargeting_Human_0433	1	0.47675	0.47665	0.999997	777	0	-0.030337	0.52325	0.52305	0.91306	1176	0	-0.030337
NonTargeting_Human_0935	1	0.477	0.47687	0.999997	778	0	-0.029055	0.523	0.52274	0.91306	1175	0	-0.029055
NonTargeting_Human_0139	1	0.47839	0.47823	0.999997	779	0	-0.026994	0.52161	0.5213	0.91306	1172	0	-0.026994
NonTargeting_Human_0791	1	0.47929	0.47906	0.999997	780	0	-0.008967	0.52071	0.52029	0.91306	1171	0	-0.008967
NonTargeting_Human_0624	1	0.47995	0.47981	0.999997	781	0	-0.024036	0.52005	0.51964	0.91306	1170	0	-0.024036
MRPL28	15	0.48022	0.75061	0.999997	782	2	0.054171	0.0053347	0.031571	0.72083	54	6	0.054171
NonTargeting_Human_0682	1	0.48143	0.48111	0.999997	783	0	-0.022775	0.51857	0.51814	0.912349	1169	0	-0.022775
NonTargeting_Human_0888	1	0.48167	0.48139	0.999997	784	0	-0.021294	0.51833	0.51795	0.912349	1168	0	-0.021294
NonTargeting_Human_0066	1	0.48372	0.48341	0.999997	785	0	-0.014967	0.51628	0.51584	0.912349	1163	0	-0.014967
DDX4	15	0.48518	0.75389	0.999997	786	3	0.21447	0.14904	0.40191	0.874764	466	6	0.21447
NonTargeting_Human_0020	1	0.48544	0.48527	0.999997	787	0	-0.010552	0.51456	0.51423	0.911878	1161	0	-0.010552
NonTargeting_Human_0340	1	0.48585	0.48571	0.999997	788	0	-0.012503	0.51415	0.51384	0.911878	1160	0	-0.012503
C19orf57	15	0.48587	0.75428	0.999997	789	3	0.096497	0.19776	0.47294	0.903587	583	4	0.096497
NonTargeting_Human_0286	1	0.487	0.4868	0.999997	790	0	-0.0094641	0.513	0.51272	0.911047	1158	0	-0.0094641
PTPMT1	15	0.48765	0.75536	0.999997	791	4	0.014728	0.22294	0.50697	0.910624	636	4	0.014728
NonTargeting_Human_0384	1	0.48766	0.48755	0.999997	792	0	-0.0055146	0.51234	0.51207	0.911047	1157	0	-0.0055146
NonTargeting_Human_0519	1	0.48938	0.48912	0.999997	793	0	-0.0018581	0.51062	0.51041	0.910624	1156	0	-0.0018581
NonTargeting_Human_0432	1	0.48954	0.48929	0.999997	794	0	-0.001683	0.51046	0.51023	0.910624	1154	0	-0.001683
NonTargeting_Human_0249	1	0.49004	0.48973	0.999997	795	0	-0.00026431	0.50996	0.50972	0.910624	1153	0	-0.00026431
NonTargeting_Human_0274	1	0.49086	0.49067	0.999997	796	0	0.0011859	0.50914	0.50894	0.910624	1152	0	0.0011859
PAGE4	15	0.49191	0.75807	0.999997	797	4	0.30109	0.091256	0.28723	0.856347	327	7	0.30109
NonTargeting_Human_0934	1	0.49397	0.49374	0.999997	798	0	0.0070856	0.50603	0.50574	0.909717	1151	0	0.0070856
NonTargeting_Human_0812	1	0.49414	0.49387	0.999997	799	0	0.011394	0.50586	0.5056	0.909717	1150	0	0.011394
NonTargeting_Human_0225	1	0.49438	0.49412	0.999997	800	0	0.0066868	0.50562	0.50537	0.909717	1148	0	0.0066868
NonTargeting_Human_0734	1	0.49496	0.49475	0.999997	801	0	0.0074758	0.50504	0.50474	0.909717	1146	0	0.0074758
NonTargeting_Human_0257	1	0.49578	0.49557	0.999997	802	0	0.02081	0.50422	0.50392	0.909717	1145	0	0.02081
NonTargeting_Human_0212	1	0.49725	0.49704	0.999997	803	0	0.016248	0.50275	0.50261	0.909689	1142	0	0.016248
NonTargeting_Human_0777	1	0.49815	0.49784	0.999997	804	0	0.015841	0.50185	0.50172	0.909002	1140	0	0.015841
NonTargeting_Human_0518	1	0.49889	0.49863	0.999997	805	0	0.013034	0.50111	0.501	0.909002	1138	0	0.013034
C19orf52	15	0.50022	0.76342	0.999997	806	4	-0.15275	0.47955	0.75958	0.968808	1096	3	-0.15275
NonTargeting_Human_0787	1	0.5016	0.50143	0.999997	807	0	0.024033	0.4984	0.49808	0.905217	1134	0	0.024033
NonTargeting_Human_0132	1	0.50193	0.5018	0.999997	808	0	0.020362	0.49807	0.49779	0.905217	1133	0	0.020362
NonTargeting_Human_0863	1	0.50226	0.50216	0.999997	809	0	0.016389	0.49774	0.49748	0.905217	1132	0	0.016389
NonTargeting_Human_0893	1	0.50258	0.50247	0.999997	810	0	0.026064	0.49742	0.49723	0.905217	1131	0	0.026064
NonTargeting_Human_0760	1	0.50308	0.5029	0.999997	811	0	0.024093	0.49692	0.49674	0.905217	1130	0	0.024093
IRS2	15	0.50311	0.76522	0.999997	812	3	0.3717	0.0036208	0.022517	0.681238	41	9	0.3717
NonTargeting_Human_0794	1	0.50324	0.503	0.999997	813	0	0.031166	0.49676	0.49656	0.905217	1128	0	0.031166
MCM3	15	0.50343	0.7654	0.999997	814	4	0.39029	0.029718	0.12682	0.825899	143	7	0.39029
KCNK4	15	0.50397	0.76564	0.999997	815	3	0.25874	0.014954	0.074175	0.779674	99	7	0.25874
ZNF124	15	0.50464	0.76602	0.999997	816	4	0.1396	0.075869	0.25398	0.846506	281	4	0.1396
NonTargeting_Human_0473	1	0.50537	0.50506	0.999997	817	0	0.029993	0.49463	0.49442	0.905144	1126	0	0.029993
NonTargeting_Human_0961	1	0.50586	0.5056	0.999997	818	0	0.032343	0.49414	0.49387	0.905076	1125	0	0.032343
SOCS1	15	0.50608	0.76704	0.999997	819	3	0.045941	0.50231	0.77782	0.968808	1141	5	0.045941
NonTargeting_Human_0521	1	0.50611	0.50582	0.999997	820	0	0.044202	0.49389	0.49365	0.905076	1124	0	0.044202
NonTargeting_Human_0203	1	0.50857	0.50835	0.999997	821	0	0.017399	0.49143	0.49123	0.904583	1121	0	0.017399
CERS2	15	0.50879	0.76879	0.999997	822	4	-0.094999	0.7156	0.89635	0.999997	1421	3	-0.094999
NonTargeting_Human_0235	1	0.50914	0.50894	0.999997	823	0	0.021379	0.49086	0.49067	0.904583	1120	0	0.021379
NonTargeting_Human_0121	1	0.50988	0.50962	0.999997	824	0	0.030448	0.49012	0.4898	0.904583	1116	0	0.030448
NonTargeting_Human_0365	1	0.51013	0.5099	0.999997	825	0	0.025625	0.48987	0.48954	0.904583	1115	0	0.025625
NonTargeting_Human_0071	1	0.51054	0.51032	0.999997	826	0	0.025715	0.48946	0.48922	0.904583	1113	0	0.025715
NonTargeting_Human_0972	1	0.51128	0.51107	0.999997	827	0	0.03935	0.48872	0.48862	0.904583	1112	0	0.03935
NonTargeting_Human_0271	1	0.51316	0.51286	0.999997	828	0	0.040033	0.48684	0.48665	0.904583	1111	0	0.040033
NonTargeting_Human_0056	1	0.51324	0.51291	0.999997	829	0	0.027343	0.48676	0.48655	0.904583	1110	0	0.027343
NonTargeting_Human_0766	1	0.51349	0.51321	0.999997	830	0	0.035368	0.48651	0.48629	0.904583	1109	0	0.035368
NonTargeting_Human_0735	1	0.51456	0.51423	0.999997	831	0	0.040618	0.48544	0.48527	0.904583	1108	0	0.040618
NonTargeting_Human_0333	1	0.51488	0.51447	0.999997	832	0	0.03302	0.48512	0.48502	0.904583	1107	0	0.03302
NonTargeting_Human_0585	1	0.51538	0.51504	0.999997	833	0	0.035126	0.48462	0.48445	0.904583	1106	0	0.035126
DAP3	15	0.51608	0.77334	0.999997	834	4	-0.371	0.020106	0.095419	0.793132	115	5	-0.371
WRNIP1	15	0.51637	0.77352	0.999997	835	3	0.38209	0.042566	0.16697	0.834289	174	8	0.38209
NonTargeting_Human_0862	1	0.51652	0.51612	0.999997	836	0	0.044294	0.48348	0.48318	0.904583	1104	0	0.044294
NonTargeting_Human_0400	1	0.51702	0.51658	0.999997	837	0	0.037172	0.48298	0.48269	0.904583	1103	0	0.037172
NonTargeting_Human_0371	1	0.5171	0.51667	0.999997	838	0	0.042683	0.4829	0.48264	0.904583	1102	0	0.042683
NDNL2	15	0.51719	0.77404	0.999997	839	4	0.087847	0.14447	0.39328	0.87153	457	6	0.087847
NonTargeting_Human_0660	1	0.51816	0.51778	0.999997	840	0	0.03808	0.48184	0.48151	0.904583	1100	0	0.03808
NonTargeting_Human_0046	1	0.51833	0.51795	0.999997	841	0	0.060108	0.48167	0.48139	0.904583	1099	0	0.060108
NonTargeting_Human_0075	1	0.51964	0.51918	0.999997	842	0	0.044245	0.48036	0.4801	0.904583	1098	0	0.044245
MGEA5	15	0.52074	0.77632	0.999997	843	3	-0.022678	0.15315	0.40955	0.876117	481	6	-0.022678
NonTargeting_Human_0182	1	0.52161	0.5213	0.999997	844	0	0.044654	0.47839	0.47823	0.903837	1094	0	0.044654
ATP5I	15	0.52195	0.77699	0.999997	845	4	0.048817	0.028554	0.12319	0.825899	136	6	0.048817
NonTargeting_Human_0963	1	0.52243	0.52216	0.999997	846	0	0.087869	0.47757	0.47744	0.903837	1093	0	0.087869
NonTargeting_Human_0633	1	0.52358	0.52347	0.999997	847	0	0.055979	0.47642	0.47627	0.903837	1091	0	0.055979
NonTargeting_Human_0403	1	0.52399	0.52387	0.999997	848	0	0.065471	0.47601	0.47584	0.903837	1090	0	0.065471
UPP2	15	0.52567	0.7793	0.999997	849	2	-0.056535	0.67624	0.87536	0.994751	1362	4	-0.056535
NonTargeting_Human_0672	1	0.52571	0.52546	0.999997	850	0	0.054371	0.47429	0.47409	0.903807	1089	0	0.054371
NonTargeting_Human_0021	1	0.5262	0.52599	0.999997	851	0	0.043173	0.4738	0.47363	0.903807	1087	0	0.043173
ELOF1	15	0.52698	0.78011	0.999997	852	4	0.39938	0.018584	0.089298	0.793132	110	8	0.39938
NonTargeting_Human_0411	1	0.52751	0.5271	0.999997	853	0	0.050371	0.47249	0.47236	0.903587	1086	0	0.050371
NonTargeting_Human_0878	1	0.52768	0.5272	0.999997	854	0	0.06982	0.47232	0.47222	0.903587	1085	0	0.06982
NonTargeting_Human_0828	1	0.52801	0.52746	0.999997	855	0	0.15897	0.47199	0.47186	0.903587	1084	0	0.15897
NonTargeting_Human_0042	1	0.52825	0.5277	0.999997	856	0	0.072078	0.47175	0.47162	0.903587	1083	0	0.072078
NonTargeting_Human_0259	1	0.52833	0.52774	0.999997	857	0	0.050575	0.47167	0.47155	0.903587	1082	0	0.050575
NonTargeting_Human_0901	1	0.52842	0.52782	0.999997	858	0	0.10984	0.47158	0.47146	0.903587	1081	0	0.10984
GAPDH	15	0.52923	0.78134	0.999997	859	4	0.13817	0.59477	0.83213	0.983604	1261	4	0.13817
TSPAN11	15	0.52982	0.7817	0.999997	860	4	0.056247	0.13074	0.36797	0.869083	430	6	0.056247
NonTargeting_Human_0885	1	0.53088	0.53041	0.999997	861	0	0.11114	0.46912	0.46884	0.903587	1077	0	0.11114
FZD6	15	0.5319	0.78305	0.999997	862	4	0.02112	0.45633	0.74067	0.968808	1059	5	0.02112
C6orf62	15	0.5322	0.78323	0.999997	863	4	0.021145	0.31455	0.62126	0.941213	823	3	0.021145
NonTargeting_Human_0661	1	0.53252	0.53198	0.999997	864	0	0.054192	0.46748	0.46724	0.903587	1076	0	0.054192
PTAR1	15	0.53279	0.78362	0.999997	865	4	-0.10396	0.95787	0.98215	0.999997	1684	2	-0.10396
ZBTB17	15	0.53302	0.78375	0.999997	866	4	-0.049988	0.2943	0.59742	0.937053	786	6	-0.049988
NonTargeting_Human_0931	1	0.53309	0.53245	0.999997	867	0	0.065372	0.46691	0.46667	0.903587	1075	0	0.065372
RNF112	15	0.53418	0.78459	0.999997	868	4	0.022922	0.32694	0.6321	0.944188	844	5	0.022922
NonTargeting_Human_0537	1	0.53457	0.53384	0.999997	869	0	0.066645	0.46543	0.46542	0.903587	1072	0	0.066645
NonTargeting_Human_0583	1	0.53637	0.53571	0.999997	870	0	0.08593	0.46363	0.46369	0.903587	1071	0	0.08593
MSI2	15	0.53694	0.7864	0.999997	871	4	0.33806	0.24273	0.53276	0.91306	681	6	0.33806
NonTargeting_Human_0440	1	0.53809	0.53733	0.999997	872	0	0.10904	0.46191	0.4618	0.901978	1069	0	0.10904
NonTargeting_Human_0278	1	0.53817	0.53741	0.999997	873	0	0.058151	0.46183	0.46169	0.901978	1067	0	0.058151
UBE2G2	15	0.53863	0.78762	0.999997	874	4	0.040239	0.25081	0.54337	0.921006	700	2	0.040239
NonTargeting_Human_0389	1	0.53867	0.5379	0.999997	875	0	0.089608	0.46133	0.461	0.901978	1065	0	0.089608
NonTargeting_Human_0617	1	0.53949	0.5387	0.999997	876	0	0.053506	0.46051	0.46027	0.901978	1064	0	0.053506
NonTargeting_Human_0677	1	0.54006	0.53944	0.999997	877	0	0.07164	0.45994	0.45974	0.901978	1063	0	0.07164
AGAP4	15	0.54092	0.78899	0.999997	878	4	0.48163	0.0032429	0.020398	0.681238	39	9	0.48163
ARGLU1	15	0.54222	0.78976	0.999997	879	2	0.14076	0.036455	0.14821	0.834289	160	4	0.14076
NonTargeting_Human_0727	1	0.54277	0.54211	0.999997	880	0	0.10521	0.45723	0.45705	0.899351	1061	0	0.10521
NonTargeting_Human_0150	1	0.54285	0.5422	0.999997	881	0	0.06802	0.45715	0.45695	0.899351	1060	0	0.06802
NUDT17	15	0.54315	0.79033	0.999997	882	3	0.25634	0.26564	0.56244	0.926051	726	6	0.25634
DNASE2	15	0.54374	0.79073	0.999997	883	2	0.083813	0.86242	0.95219	0.999997	1590	3	0.083813
NonTargeting_Human_0701	1	0.54392	0.54327	0.999997	884	0	0.049959	0.45608	0.45598	0.899351	1058	0	0.049959
RPL28	15	0.5446	0.79123	0.999997	885	3	0.022031	0.20171	0.47821	0.903837	592	6	0.022031
NonTargeting_Human_0444	1	0.54482	0.54425	0.999997	886	0	0.071648	0.45518	0.45509	0.899351	1057	0	0.071648
NonTargeting_Human_0434	1	0.54597	0.54562	0.999997	887	0	0.10164	0.45403	0.45375	0.899351	1056	0	0.10164
NonTargeting_Human_0552	1	0.54654	0.54617	0.999997	888	0	0.14163	0.45346	0.45319	0.899351	1055	0	0.14163
LGR5	15	0.54845	0.79344	0.999997	889	3	0.32754	0.18194	0.45137	0.899351	543	6	0.32754
NonTargeting_Human_0174	1	0.549	0.54855	0.999997	890	0	0.064494	0.451	0.45069	0.899351	1054	0	0.064494
SPI1	15	0.54934	0.79394	0.999997	891	3	0.29585	0.10927	0.32433	0.862265	376	7	0.29585
PLA2G10	15	0.55019	0.79445	0.999997	892	4	0.17055	0.36729	0.66723	0.953192	920	5	0.17055
NonTargeting_Human_0138	1	0.55023	0.54981	0.999997	893	0	0.07619	0.44977	0.44954	0.899074	1053	0	0.07619
NonTargeting_Human_0626	1	0.55039	0.54995	0.999997	894	0	0.072796	0.44961	0.44941	0.899074	1052	0	0.072796
TPP2	15	0.55107	0.79513	0.999997	895	4	0.24791	0.43563	0.72442	0.965555	1028	5	0.24791
NonTargeting_Human_0730	1	0.5513	0.55085	0.999997	896	0	0.071903	0.4487	0.44858	0.899074	1051	0	0.071903
MORC2	15	0.55137	0.79527	0.999997	897	3	-0.11335	0.052194	0.19497	0.834289	205	3	-0.11335
PIM2	15	0.55253	0.79596	0.999997	898	1	0.23871	0.072195	0.24565	0.838356	272	7	0.23871
NonTargeting_Human_0231	1	0.5531	0.55273	0.999997	899	0	0.059734	0.4469	0.44675	0.896561	1049	0	0.059734
NonTargeting_Human_0381	1	0.55351	0.55311	0.999997	900	0	0.10692	0.44649	0.44632	0.896561	1048	0	0.10692
NonTargeting_Human_0453	1	0.55417	0.5538	0.999997	901	0	0.21263	0.44583	0.44569	0.896506	1047	0	0.21263
NonTargeting_Human_0146	1	0.5563	0.55615	0.999997	902	0	0.070924	0.4437	0.44354	0.894672	1044	0	0.070924
KCNK12	15	0.55658	0.79833	0.999997	903	3	0.033469	0.32596	0.63132	0.944188	843	5	0.033469
ANO8	15	0.55749	0.79893	0.999997	904	4	-0.10258	0.29258	0.59534	0.937053	781	5	-0.10258
NonTargeting_Human_0710	1	0.55843	0.55833	0.999997	905	0	0.11332	0.44157	0.44126	0.891906	1042	0	0.11332
NonTargeting_Human_0417	1	0.55859	0.55848	0.999997	906	0	0.10112	0.44141	0.44111	0.891906	1041	0	0.10112
KDM6A	15	0.55894	0.79985	0.999997	907	4	-0.096592	0.99682	0.99669	0.999997	1729	0	-0.096592
NCBP1	14	0.56053	0.79443	0.999997	908	2	-0.17002	0.050991	0.18781	0.834289	203	6	-0.17002
RPL41	7	0.56114	0.70276	0.999997	909	1	0.17624	0.11461	0.27316	0.854265	393	3	0.17624
NonTargeting_Human_0177	1	0.5613	0.56122	0.999997	910	0	0.10561	0.4387	0.43849	0.8902	1037	0	0.10561
NonTargeting_Human_0830	1	0.56155	0.56149	0.999997	911	0	0.12726	0.43845	0.43825	0.8902	1035	0	0.12726
TSPYL4	15	0.56185	0.80151	0.999997	912	4	0.084261	0.56185	0.81407	0.976849	1220	4	0.084261
NonTargeting_Human_0176	1	0.56237	0.56243	0.999997	913	0	0.091966	0.43763	0.43749	0.8902	1034	0	0.091966
DNAJC17	15	0.563	0.80214	0.999997	914	3	-0.031801	0.50565	0.78045	0.968808	1149	5	-0.031801
NonTargeting_Human_0796	1	0.56319	0.56327	0.999997	915	0	0.1722	0.43681	0.43658	0.889402	1031	0	0.1722
NonTargeting_Human_0166	1	0.56335	0.56343	0.999997	916	0	0.13931	0.43665	0.43642	0.889402	1030	0	0.13931
NonTargeting_Human_0057	1	0.56351	0.56359	0.999997	917	0	0.11568	0.43649	0.43627	0.889402	1029	0	0.11568
ZNF548	15	0.56377	0.8026	0.999997	918	2	0.18739	0.071738	0.24465	0.838356	270	5	0.18739
NonTargeting_Human_0305	1	0.56466	0.5648	0.999997	919	0	0.20428	0.43534	0.43516	0.889402	1027	0	0.20428
NonTargeting_Human_0556	1	0.56499	0.56516	0.999997	920	0	0.098908	0.43501	0.43487	0.889402	1026	0	0.098908
AXIN1	15	0.56503	0.80341	0.999997	921	4	-0.068849	0.0054237	0.032045	0.72083	55	3	-0.068849
NonTargeting_Human_0684	1	0.56647	0.56659	0.999997	922	0	0.084546	0.43353	0.4333	0.889402	1025	0	0.084546
NonTargeting_Human_0686	1	0.56663	0.5668	0.999997	923	0	0.092089	0.43337	0.43316	0.889402	1024	0	0.092089
FBXL5	15	0.56665	0.80438	0.999997	924	4	0.10859	0.2643	0.56061	0.926051	725	5	0.10859
NonTargeting_Human_0997	1	0.56712	0.56725	0.999997	925	0	0.31559	0.43288	0.43263	0.889402	1023	0	0.31559
KIF3C	15	0.56761	0.80502	0.999997	926	4	0.081362	0.27493	0.57384	0.926051	748	5	0.081362
NonTargeting_Human_0484	1	0.56885	0.56899	0.999997	927	0	0.10448	0.43115	0.43096	0.889402	1022	0	0.10448
NonTargeting_Human_0196	1	0.56893	0.56906	0.999997	928	0	0.10622	0.43107	0.43091	0.889402	1021	0	0.10622
CLDND2	15	0.56922	0.80603	0.999997	929	3	0.22702	0.0029287	0.01855	0.681238	34	7	0.22702
NonTargeting_Human_0216	1	0.57008	0.57026	0.999997	930	0	0.17207	0.42992	0.42971	0.889402	1020	0	0.17207
CDH1	15	0.57076	0.80702	0.999997	931	1	0.65103	0.00075549	0.0057954	0.519372	16	11	0.65103
CDK12	15	0.57082	0.80705	0.999997	932	3	-0.02738	0.50524	0.78004	0.968808	1147	4	-0.02738
NonTargeting_Human_0188	1	0.57213	0.57228	0.999997	933	0	0.20176	0.42787	0.42771	0.889402	1018	0	0.20176
NonTargeting_Human_0208	1	0.57254	0.57274	0.999997	934	0	0.1272	0.42746	0.42735	0.889402	1017	0	0.1272
TMEM134	15	0.57374	0.80899	0.999997	935	3	0.036861	0.099256	0.3042	0.856745	353	4	0.036861
NonTargeting_Human_0867	1	0.57409	0.57431	0.999997	936	0	0.12669	0.42591	0.42581	0.889402	1016	0	0.12669
NonTargeting_Human_0397	1	0.57459	0.57477	0.999997	937	0	0.12576	0.42541	0.42534	0.889402	1015	0	0.12576
NonTargeting_Human_0523	1	0.57475	0.57493	0.999997	938	0	0.17231	0.42525	0.42521	0.889402	1014	0	0.17231
NonTargeting_Human_0984	1	0.57647	0.57667	0.999997	939	0	0.14376	0.42353	0.42355	0.889402	1013	0	0.14376
NonTargeting_Human_0702	1	0.57762	0.57791	0.999997	940	0	0.11764	0.42238	0.42245	0.889402	1012	0	0.11764
GAGE12B	15	0.5798	0.81274	0.999997	941	4	0.064855	0.71825	0.89776	0.999997	1425	2	0.064855
OR56A1	15	0.58004	0.81287	0.999997	942	3	0.24601	0.069829	0.24054	0.838356	263	7	0.24601
TRIM4	15	0.58139	0.81369	0.999997	943	4	0.17683	0.29997	0.6043	0.939157	798	5	0.17683
NonTargeting_Human_0247	1	0.58147	0.58194	0.999997	944	0	0.12274	0.41853	0.41875	0.886061	1009	0	0.12274
RAB28	15	0.58225	0.81428	0.999997	945	3	-0.077297	0.34836	0.65063	0.952293	882	4	-0.077297
NonTargeting_Human_0222	1	0.58229	0.58278	0.999997	946	0	0.36607	0.41771	0.41789	0.886061	1008	0	0.36607
SLC35A2	15	0.58281	0.81471	0.999997	947	4	0.12708	0.098197	0.30198	0.856745	349	5	0.12708
ZNF764	15	0.58288	0.81477	0.999997	948	2	0.18727	0.066219	0.23237	0.838356	254	6	0.18727
GZF1	15	0.58394	0.81546	0.999997	949	2	0.12863	0.27076	0.56868	0.926051	739	6	0.12863
NonTargeting_Human_0498	1	0.58434	0.58475	0.999997	950	0	0.14032	0.41566	0.41573	0.882862	1005	0	0.14032
NonTargeting_Human_0172	1	0.58549	0.58595	0.999997	951	0	0.16628	0.41451	0.41461	0.881555	1004	0	0.16628
NonTargeting_Human_0267	1	0.58557	0.58603	0.999997	952	0	0.10527	0.41443	0.41452	0.881555	1003	0	0.10527
PGM3	15	0.58594	0.81677	0.999997	953	4	0.080611	0.45973	0.74341	0.968808	1062	5	0.080611
NonTargeting_Human_0908	1	0.5868	0.5873	0.999997	954	0	0.18641	0.4132	0.41331	0.881555	1002	0	0.18641
NonTargeting_Human_0599	1	0.58869	0.58911	0.999997	955	0	0.12323	0.41131	0.41143	0.879057	999	0	0.12323
STARD4	15	0.58936	0.81912	0.999997	956	2	0.072679	0.49056	0.76834	0.968808	1118	4	0.072679
NonTargeting_Human_0325	1	0.59091	0.59139	0.999997	957	0	0.13642	0.40909	0.40932	0.876117	996	0	0.13642
NonTargeting_Human_0655	1	0.59107	0.59152	0.999997	958	0	0.21818	0.40893	0.40913	0.876117	995	0	0.21818
MCCC2	15	0.59131	0.82038	0.999997	959	4	0.23897	0.26695	0.56404	0.926051	730	6	0.23897
SIRT5	15	0.5926	0.82124	0.999997	960	4	-0.089924	0.53958	0.80282	0.97183	1199	3	-0.089924
NonTargeting_Human_0436	1	0.59279	0.59327	0.999997	961	0	0.18513	0.40721	0.40729	0.875545	994	0	0.18513
ATP11A	15	0.59416	0.82219	0.999997	962	2	0.095573	0.096816	0.29894	0.856347	344	6	0.095573
NonTargeting_Human_0173	1	0.59435	0.5947	0.999997	963	0	0.17176	0.40565	0.40563	0.874764	993	0	0.17176
NCOR1	15	0.59446	0.82241	0.999997	964	4	0.31727	0.021736	0.1007	0.794733	120	8	0.31727
NonTargeting_Human_0370	1	0.59476	0.59519	0.999997	965	0	0.13346	0.40524	0.40517	0.874764	992	0	0.13346
NonTargeting_Human_0357	1	0.5955	0.59587	0.999997	966	0	0.10822	0.4045	0.40435	0.874764	991	0	0.10822
NonTargeting_Human_0343	1	0.59583	0.59616	0.999997	967	0	0.20549	0.40417	0.40399	0.874764	990	0	0.20549
NonTargeting_Human_0778	1	0.59615	0.59652	0.999997	968	0	0.15587	0.40385	0.40369	0.874764	989	0	0.15587
FAM126A	15	0.59665	0.82377	0.999997	969	4	0.00016228	0.37289	0.67195	0.954078	932	4	0.00016228
NonTargeting_Human_0663	1	0.59697	0.5974	0.999997	970	0	0.21787	0.40303	0.403	0.874764	988	0	0.21787
NonTargeting_Human_0514	1	0.5982	0.59865	0.999997	971	0	0.18618	0.4018	0.40189	0.874764	986	0	0.18618
MAOB	15	0.59833	0.82488	0.999997	972	4	0.065788	0.26905	0.56651	0.926051	733	5	0.065788
NonTargeting_Human_0252	1	0.59894	0.59937	0.999997	973	0	0.11548	0.40106	0.40112	0.874764	985	0	0.11548
NonTargeting_Human_0890	1	0.59927	0.59972	0.999997	974	0	0.12285	0.40073	0.40083	0.874764	984	0	0.12285
WBSCR16	15	0.59942	0.82548	0.999997	975	4	-0.18887	0.96015	0.98298	0.999997	1685	2	-0.18887
MKL1	15	0.59949	0.8255	0.999997	976	4	-0.022388	0.22698	0.51224	0.911047	645	4	-0.022388
BID	15	0.60056	0.82619	0.999997	977	4	0.096715	0.052742	0.19659	0.834289	210	7	0.096715
SPATA25	15	0.60168	0.82688	0.999997	978	3	-0.01189	0.58343	0.82575	0.97982	1255	1	-0.01189
NonTargeting_Human_0625	1	0.60181	0.60248	0.999997	979	0	0.2281	0.39819	0.39844	0.874764	982	0	0.2281
NonTargeting_Human_0070	1	0.60427	0.60506	0.999997	980	0	0.15496	0.39573	0.39597	0.87153	980	0	0.15496
NonTargeting_Human_0586	1	0.60444	0.60529	0.999997	981	0	0.15518	0.39556	0.39581	0.87153	978	0	0.15518
SLC4A1AP	15	0.60495	0.82897	0.999997	982	3	0.0085193	0.23775	0.52635	0.91306	666	6	0.0085193
NonTargeting_Human_0857	1	0.60501	0.60586	0.999997	983	0	0.19747	0.39499	0.39526	0.87153	977	0	0.19747
CARM1	15	0.60526	0.82914	0.999997	984	3	0.37971	0.01508	0.074763	0.779674	100	8	0.37971
NonTargeting_Human_0768	1	0.60558	0.60636	0.999997	985	0	0.20329	0.39442	0.39473	0.87153	974	0	0.20329
NonTargeting_Human_0532	1	0.60673	0.6074	0.999997	986	0	0.14104	0.39327	0.39362	0.87153	972	0	0.14104
KLHL20	15	0.60696	0.83031	0.999997	987	4	0.45684	0.0048718	0.02935	0.714178	51	8	0.45684
EGFR	15	0.60724	0.83049	0.999997	988	4	0.056394	0.36925	0.66886	0.953357	925	5	0.056394
NonTargeting_Human_0557	1	0.6078	0.60854	0.999997	989	0	0.14643	0.3922	0.39262	0.87153	971	0	0.14643
NonTargeting_Human_0077	1	0.60788	0.60864	0.999997	990	0	0.12969	0.39212	0.39255	0.87153	970	0	0.12969
NonTargeting_Human_0322	1	0.60804	0.60885	0.999997	991	0	0.18879	0.39196	0.39237	0.87153	969	0	0.18879
NonTargeting_Human_0906	1	0.60845	0.6092	0.999997	992	0	0.14588	0.39155	0.39191	0.87153	968	0	0.14588
PON1	15	0.60862	0.83141	0.999997	993	4	0.0057401	0.19682	0.47165	0.903587	580	4	0.0057401
NonTargeting_Human_0674	1	0.60878	0.60956	0.999997	994	0	0.14847	0.39122	0.39159	0.87153	967	0	0.14847
NonTargeting_Human_0942	1	0.60903	0.6098	0.999997	995	0	0.14856	0.39097	0.39133	0.87153	966	0	0.14856
NonTargeting_Human_0914	1	0.60928	0.61002	0.999997	996	0	0.1945	0.39072	0.39107	0.87153	965	0	0.1945
NonTargeting_Human_0360	1	0.61083	0.61147	0.999997	997	0	0.16035	0.38917	0.38958	0.87153	964	0	0.16035
NonTargeting_Human_0835	1	0.61149	0.61213	0.999997	998	0	0.3062	0.38851	0.38893	0.87153	963	0	0.3062
NonTargeting_Human_0065	1	0.61165	0.61224	0.999997	999	0	0.1336	0.38835	0.38874	0.87153	962	0	0.1336
NonTargeting_Human_0097	1	0.61198	0.61256	0.999997	1000	0	0.17299	0.38802	0.38841	0.87153	961	0	0.17299
AIM1	15	0.61251	0.83395	0.999997	1001	4	-0.056428	0.5004	0.77637	0.968808	1137	4	-0.056428
RAB7A	15	0.61288	0.8342	0.999997	1002	3	0.35016	0.16663	0.43014	0.889402	509	6	0.35016
PDGFA	15	0.61409	0.83484	0.999997	1003	3	0.12953	0.44442	0.73133	0.965555	1046	5	0.12953
NonTargeting_Human_0244	1	0.6142	0.61492	0.999997	1004	0	0.18	0.3858	0.3861	0.87153	958	0	0.18
NonTargeting_Human_0845	1	0.61489	0.61564	0.999997	1005	0	0.2109	0.38511	0.38544	0.87153	957	0	0.2109
NonTargeting_Human_0810	1	0.61592	0.61677	0.999997	1006	0	0.28305	0.38408	0.3844	0.87153	956	0	0.28305
NonTargeting_Human_0943	1	0.61707	0.61781	0.999997	1007	0	0.28423	0.38293	0.38323	0.87153	955	0	0.28423
CNOT2	15	0.61715	0.83677	0.999997	1008	4	-0.08662	0.48288	0.76232	0.968808	1101	2	-0.08662
NonTargeting_Human_0659	1	0.61797	0.61872	0.999997	1009	0	0.25853	0.38203	0.38239	0.87153	954	0	0.25853
SHC1	15	0.61802	0.83734	0.999997	1010	3	0.30712	0.042203	0.16586	0.834289	173	7	0.30712
NonTargeting_Human_0632	1	0.61838	0.61907	0.999997	1011	0	0.18873	0.38162	0.382	0.87153	953	0	0.18873
NonTargeting_Human_0945	1	0.62018	0.62079	0.999997	1012	0	0.24064	0.37982	0.37998	0.869083	951	0	0.24064
NonTargeting_Human_0808	1	0.62026	0.62088	0.999997	1013	0	0.27215	0.37974	0.37989	0.869083	950	0	0.27215
NHLRC2	15	0.62087	0.83907	0.999997	1014	3	0.51431	0.0042588	0.026066	0.706346	45	9	0.51431
NonTargeting_Human_0744	1	0.621	0.62175	0.999997	1015	0	0.15878	0.379	0.37908	0.869083	949	0	0.15878
NonTargeting_Human_0027	1	0.62108	0.62181	0.999997	1016	0	0.20649	0.37892	0.37902	0.869083	948	0	0.20649
NonTargeting_Human_0806	1	0.62141	0.62219	0.999997	1017	0	0.20158	0.37859	0.37865	0.869083	947	0	0.20158
NonTargeting_Human_0124	1	0.62174	0.6225	0.999997	1018	0	0.19263	0.37826	0.37826	0.869083	946	0	0.19263
NonTargeting_Human_0241	1	0.62182	0.6226	0.999997	1019	0	0.2696	0.37818	0.3782	0.869083	945	0	0.2696
SULT6B1	15	0.62187	0.83967	0.999997	1020	3	0.24575	0.10461	0.31511	0.858624	361	3	0.24575
LSM2	15	0.62192	0.83973	0.999997	1021	3	0.36759	0.076312	0.25494	0.8469	282	6	0.36759
NonTargeting_Human_0164	1	0.62223	0.62298	0.999997	1022	0	0.28505	0.37777	0.37777	0.869083	943	0	0.28505
NonTargeting_Human_0338	1	0.62264	0.62337	0.999997	1023	0	0.21188	0.37736	0.37739	0.869083	942	0	0.21188
PIP5K1A	15	0.62281	0.84033	0.999997	1024	3	0.10254	0.27186	0.56996	0.926051	742	4	0.10254
NonTargeting_Human_0503	1	0.62313	0.62384	0.999997	1025	0	0.20349	0.37687	0.37694	0.869083	941	0	0.20349
NonTargeting_Human_0364	1	0.62371	0.62449	0.999997	1026	0	0.3033	0.37629	0.37638	0.869083	940	0	0.3033
NonTargeting_Human_0543	1	0.62428	0.62519	0.999997	1027	0	0.17849	0.37572	0.37582	0.869083	939	0	0.17849
NonTargeting_Human_0569	1	0.62445	0.6253	0.999997	1028	0	0.28873	0.37555	0.37565	0.869083	938	0	0.28873
ISG15	15	0.62477	0.84156	0.999997	1029	4	-0.11807	0.99469	0.99482	0.999997	1722	1	-0.11807
NonTargeting_Human_0155	1	0.62477	0.62561	0.999997	1030	0	0.18031	0.37523	0.37526	0.869083	937	0	0.18031
NonTargeting_Human_0162	1	0.62535	0.62621	0.999997	1031	0	0.27297	0.37465	0.37477	0.869083	936	0	0.27297
NonTargeting_Human_0668	1	0.62543	0.62631	0.999997	1032	0	0.20084	0.37457	0.3747	0.869083	935	0	0.20084
NonTargeting_Human_0024	1	0.62576	0.62669	0.999997	1033	0	0.2732	0.37424	0.37436	0.869083	934	0	0.2732
NonTargeting_Human_0596	1	0.6265	0.62746	0.999997	1034	0	0.23715	0.3735	0.37351	0.869083	933	0	0.23715
IBA57	15	0.62667	0.8427	0.999997	1035	4	0.062599	0.29377	0.5967	0.937053	783	6	0.062599
EEFSEC	15	0.6268	0.8428	0.999997	1036	1	0.20512	0.11432	0.33464	0.867352	391	6	0.20512
NonTargeting_Human_0536	1	0.62748	0.62842	0.999997	1037	0	0.14128	0.37252	0.37248	0.869083	931	0	0.14128
NonTargeting_Human_0534	1	0.62773	0.62872	0.999997	1038	0	0.16457	0.37227	0.37224	0.869083	930	0	0.16457
HNRNPM	15	0.62856	0.84388	0.999997	1039	4	-0.028599	0.091207	0.28715	0.856347	326	4	-0.028599
NonTargeting_Human_0098	1	0.62879	0.62982	0.999997	1040	0	0.17601	0.37121	0.3711	0.869083	929	0	0.17601
TBX1	15	0.62906	0.84421	0.999997	1041	3	0.48632	0.0030769	0.019432	0.681238	38	8	0.48632
NonTargeting_Human_0953	1	0.63052	0.63178	0.999997	1042	0	0.28951	0.36948	0.36951	0.869083	927	0	0.28951
NonTargeting_Human_0382	1	0.6306	0.63185	0.999997	1043	0	0.20534	0.3694	0.36943	0.869083	926	0	0.20534
NonTargeting_Human_0705	1	0.63084	0.63206	0.999997	1044	0	0.13508	0.36916	0.3692	0.869083	924	0	0.13508
NonTargeting_Human_0967	1	0.63093	0.63215	0.999997	1045	0	0.24527	0.36907	0.36913	0.869083	923	0	0.24527
CCDC169-SOHLH2	15	0.63152	0.84581	0.999997	1046	4	-0.16256	0.16374	0.42567	0.889402	500	4	-0.16256
NonTargeting_Human_0829	1	0.6324	0.63369	0.999997	1047	0	0.23283	0.3676	0.36758	0.869083	921	0	0.23283
MED12	15	0.6329	0.84662	0.999997	1048	4	0.17035	0.020664	0.097159	0.793132	117	6	0.17035
NonTargeting_Human_0615	1	0.63298	0.63426	0.999997	1049	0	0.25936	0.36702	0.36696	0.869083	919	0	0.25936
LACRT	15	0.63349	0.84696	0.999997	1050	3	-0.099104	0.050636	0.19031	0.834289	200	3	-0.099104
CREB5	15	0.63428	0.84753	0.999997	1051	4	0.15372	0.14949	0.40269	0.874764	468	6	0.15372
NonTargeting_Human_0446	1	0.63462	0.6358	0.999997	1052	0	0.17214	0.36538	0.36527	0.869083	917	0	0.17214
NonTargeting_Human_0356	1	0.63478	0.63595	0.999997	1053	0	0.22742	0.36522	0.36508	0.869083	916	0	0.22742
NonTargeting_Human_0047	1	0.6356	0.63689	0.999997	1054	0	0.20745	0.3644	0.36424	0.869083	915	0	0.20745
NonTargeting_Human_0976	1	0.63658	0.63776	0.999997	1055	0	0.22636	0.36342	0.36334	0.869083	914	0	0.22636
NonTargeting_Human_0246	1	0.63667	0.63787	0.999997	1056	0	0.35563	0.36333	0.36325	0.869083	913	0	0.35563
KRTAP13-2	15	0.63696	0.84926	0.999997	1057	3	-0.045923	0.47132	0.75263	0.968808	1079	4	-0.045923
NonTargeting_Human_0206	1	0.63732	0.63858	0.999997	1058	0	0.3027	0.36268	0.36249	0.869083	910	0	0.3027
SEZ6L2	15	0.63737	0.84953	0.999997	1059	3	0.011959	0.564	0.81516	0.976849	1224	3	0.011959
PKD1	15	0.63744	0.84957	0.999997	1060	2	0.10771	0.072783	0.24702	0.838356	274	7	0.10771
NonTargeting_Human_0351	1	0.6379	0.63913	0.999997	1061	0	0.24785	0.3621	0.3619	0.869083	906	0	0.24785
HIST1H2BF	15	0.6398	0.85097	0.999997	1062	4	0.11785	0.1274	0.36099	0.869083	422	7	0.11785
CLEC12B	15	0.6401	0.85122	0.999997	1063	3	0.082221	0.18432	0.45463	0.899351	548	6	0.082221
NonTargeting_Human_0126	1	0.64011	0.64145	0.999997	1064	0	0.26651	0.35989	0.35985	0.869083	905	0	0.26651
NonTargeting_Human_0084	1	0.64036	0.64163	0.999997	1065	0	0.24034	0.35964	0.35962	0.869083	904	0	0.24034
VPS35	15	0.64079	0.85166	0.999997	1066	3	-0.2268	0.4104	0.70317	0.962465	998	5	-0.2268
NonTargeting_Human_0937	1	0.6415	0.64283	0.999997	1067	0	0.19799	0.3585	0.35844	0.869083	903	0	0.19799
NonTargeting_Human_0116	1	0.64175	0.64305	0.999997	1068	0	0.18479	0.35825	0.35822	0.869083	901	0	0.18479
HSPA8	15	0.64315	0.85318	0.999997	1069	3	0.16242	0.46313	0.74609	0.968808	1070	5	0.16242
CUL7	15	0.64359	0.85345	0.999997	1070	1	0.55516	0.005818	0.033831	0.72114	57	9	0.55516
NonTargeting_Human_0849	1	0.64421	0.64555	0.999997	1071	0	0.21631	0.35579	0.35596	0.869083	898	0	0.21631
NonTargeting_Human_0993	1	0.64552	0.64696	0.999997	1072	0	0.27019	0.35448	0.35462	0.869083	896	0	0.27019
NonTargeting_Human_0029	1	0.6456	0.64705	0.999997	1073	0	0.33238	0.3544	0.35454	0.869083	895	0	0.33238
RBM3	15	0.64562	0.85463	0.999997	1074	4	0.053591	0.23111	0.51747	0.912349	656	6	0.053591
NonTargeting_Human_0512	1	0.64577	0.64722	0.999997	1075	0	0.35288	0.35423	0.35434	0.869083	894	0	0.35288
NonTargeting_Human_0928	1	0.64626	0.64773	0.999997	1076	0	0.41338	0.35374	0.35387	0.869083	893	0	0.41338
NonTargeting_Human_0751	1	0.64765	0.64917	0.999997	1077	0	0.33703	0.35235	0.3525	0.869083	891	0	0.33703
NonTargeting_Human_0922	1	0.64839	0.64996	0.999997	1078	0	0.30523	0.35161	0.35173	0.869083	890	0	0.30523
NonTargeting_Human_0627	1	0.64938	0.65096	0.999997	1079	0	0.27115	0.35062	0.35076	0.869083	888	0	0.27115
NonTargeting_Human_0490	1	0.64946	0.651	0.999997	1080	0	0.2667	0.35054	0.35068	0.869083	887	0	0.2667
ARPC3	15	0.64956	0.85711	0.999997	1081	4	0.25842	0.11491	0.33565	0.867352	395	7	0.25842
NonTargeting_Human_0085	1	0.6497	0.6512	0.999997	1082	0	0.23218	0.3503	0.35038	0.869083	886	0	0.23218
NonTargeting_Human_0413	1	0.64987	0.65135	0.999997	1083	0	0.32402	0.35013	0.35022	0.869083	885	0	0.32402
DNLZ	15	0.64988	0.8573	0.999997	1084	2	-0.012487	0.071291	0.24376	0.838356	268	6	-0.012487
NonTargeting_Human_0948	1	0.65102	0.65248	0.999997	1085	0	0.23746	0.34898	0.34898	0.869083	884	0	0.23746
THOC6	15	0.65104	0.85791	0.999997	1086	3	-0.028286	0.96578	0.98539	0.999997	1694	2	-0.028286
NonTargeting_Human_0545	1	0.65266	0.65401	0.999997	1087	0	0.32823	0.34734	0.34745	0.869083	880	0	0.32823
NonTargeting_Human_0367	1	0.65282	0.65412	0.999997	1088	0	0.28705	0.34718	0.34725	0.869083	879	0	0.28705
SLX4	15	0.65287	0.859	0.999997	1089	3	0.10219	0.35841	0.65953	0.953192	902	5	0.10219
S100A14	15	0.65333	0.85925	0.999997	1090	2	0.11007	0.52628	0.7958	0.970431	1181	4	0.11007
SMNDC1	15	0.65345	0.85931	0.999997	1091	3	0.42508	0.099739	0.30514	0.856745	354	7	0.42508
NonTargeting_Human_0180	1	0.65372	0.65506	0.999997	1092	0	0.21012	0.34628	0.34649	0.869083	877	0	0.21012
CLEC3B	15	0.65424	0.85974	0.999997	1093	2	0.12137	0.11125	0.32849	0.865428	385	5	0.12137
NonTargeting_Human_0631	1	0.65454	0.65596	0.999997	1094	0	0.26907	0.34546	0.34569	0.869083	876	0	0.26907
NonTargeting_Human_0820	1	0.65479	0.65619	0.999997	1095	0	0.20177	0.34521	0.34547	0.869083	875	0	0.20177
NonTargeting_Human_0707	1	0.65487	0.6563	0.999997	1096	0	0.2543	0.34513	0.34538	0.869083	874	0	0.2543
NonTargeting_Human_0551	1	0.65569	0.6572	0.999997	1097	0	0.17194	0.34431	0.34466	0.869083	873	0	0.17194
CHAF1B	14	0.65572	0.85023	0.999997	1098	2	0.10829	0.32254	0.6148	0.941213	836	4	0.10829
CCT6B	15	0.65585	0.86074	0.999997	1099	2	0.17543	0.033795	0.13987	0.834289	153	6	0.17543
NonTargeting_Human_0051	1	0.65627	0.65772	0.999997	1100	0	0.29394	0.34373	0.34407	0.869083	871	0	0.29394
NonTargeting_Human_0157	1	0.65651	0.65802	0.999997	1101	0	0.28448	0.34349	0.34388	0.869083	870	0	0.28448
NonTargeting_Human_0511	1	0.65676	0.65822	0.999997	1102	0	0.32186	0.34324	0.34362	0.869083	869	0	0.32186
DHRSX	15	0.65789	0.86194	0.999997	1103	4	0.27847	0.087657	0.27938	0.854998	314	6	0.27847
NonTargeting_Human_0091	1	0.65815	0.65949	0.999997	1104	0	0.20082	0.34185	0.34193	0.869083	867	0	0.20082
FRY	15	0.65855	0.86229	0.999997	1105	3	0.021347	0.32412	0.62964	0.944188	839	5	0.021347
NonTargeting_Human_0809	1	0.66004	0.66112	0.999997	1106	0	0.44103	0.33996	0.33982	0.869083	865	0	0.44103
NonTargeting_Human_0319	1	0.66086	0.66183	0.999997	1107	0	0.23023	0.33914	0.33909	0.869083	864	0	0.23023
NonTargeting_Human_0717	1	0.66184	0.66296	0.999997	1108	0	0.27157	0.33816	0.33813	0.869083	863	0	0.27157
NonTargeting_Human_0732	1	0.66209	0.66318	0.999997	1109	0	0.41311	0.33791	0.33786	0.869083	861	0	0.41311
NonTargeting_Human_0505	1	0.66414	0.66517	0.999997	1110	0	0.41133	0.33586	0.33557	0.867352	859	0	0.41133
NonTargeting_Human_0979	1	0.66422	0.66526	0.999997	1111	0	0.76453	0.33578	0.33551	0.867352	858	0	0.76453
NonTargeting_Human_0295	1	0.66447	0.66546	0.999997	1112	0	0.25767	0.33553	0.33523	0.867352	857	0	0.25767
NonTargeting_Human_0859	1	0.66455	0.66553	0.999997	1113	0	0.26009	0.33545	0.33516	0.867352	856	0	0.26009
NonTargeting_Human_0526	1	0.66594	0.66692	0.999997	1114	0	0.28428	0.33406	0.33366	0.867352	854	0	0.28428
NonTargeting_Human_0001	1	0.66627	0.66731	0.999997	1115	0	0.28368	0.33373	0.33333	0.867352	853	0	0.28368
NonTargeting_Human_0081	1	0.66652	0.66759	0.999997	1116	0	0.41781	0.33348	0.33304	0.867352	852	0	0.41781
NonTargeting_Human_0311	1	0.66775	0.66892	0.999997	1117	0	0.26296	0.33225	0.33178	0.867352	851	0	0.26296
CAND1	15	0.66823	0.86845	0.999997	1118	3	0.12074	0.24136	0.53093	0.91306	675	6	0.12074
ATP5F1	15	0.66857	0.86859	0.999997	1119	3	-0.091459	0.045556	0.17577	0.834289	186	5	-0.091459
NonTargeting_Human_0910	1	0.66947	0.67049	0.999997	1120	0	0.22825	0.33053	0.33009	0.86667	850	0	0.22825
PRELP	15	0.66951	0.86915	0.999997	1121	3	-0.19952	0.36301	0.66348	0.953192	911	4	-0.19952
NonTargeting_Human_0827	1	0.6716	0.67249	0.999997	1122	0	0.36084	0.3284	0.32794	0.865285	847	0	0.36084
NonTargeting_Human_0110	1	0.67201	0.67289	0.999997	1123	0	0.32874	0.32799	0.32758	0.865285	846	0	0.32874
USP50	15	0.67303	0.87081	0.999997	1124	2	0.33705	0.0528	0.19675	0.834289	212	7	0.33705
GALR1	15	0.6738	0.87109	0.999997	1125	3	0.044901	0.023347	0.10607	0.803055	130	7	0.044901
NonTargeting_Human_0082	1	0.67529	0.67598	0.999997	1126	0	0.26229	0.32471	0.32425	0.862265	842	0	0.26229
NonTargeting_Human_0106	1	0.67546	0.67612	0.999997	1127	0	0.20958	0.32454	0.32407	0.862265	841	0	0.20958
NonTargeting_Human_0074	1	0.67562	0.67622	0.999997	1128	0	0.24008	0.32438	0.32393	0.862265	840	0	0.24008
NonTargeting_Human_0664	1	0.67603	0.67657	0.999997	1129	0	0.2079	0.32397	0.32358	0.862265	838	0	0.2079
NonTargeting_Human_0131	1	0.67652	0.6771	0.999997	1130	0	0.31109	0.32348	0.32311	0.862265	837	0	0.31109
NonTargeting_Human_0725	1	0.67767	0.67823	0.999997	1131	0	0.34342	0.32233	0.32189	0.862265	835	0	0.34342
GLOD5	15	0.67795	0.87263	0.999997	1132	3	0.18912	0.10844	0.32278	0.862265	374	7	0.18912
NonTargeting_Human_0031	1	0.67808	0.67868	0.999997	1133	0	0.32437	0.32192	0.32147	0.862265	834	0	0.32437
NonTargeting_Human_0080	1	0.68046	0.68118	0.999997	1134	0	0.32656	0.31954	0.31913	0.862141	833	0	0.32656
RAB13	15	0.68121	0.87377	0.999997	1135	3	0.29487	0.013694	0.068807	0.779674	94	8	0.29487
FAM21A	15	0.68154	0.87389	0.999997	1136	3	0.41267	0.057896	0.21143	0.834289	231	8	0.41267
CAPZB	15	0.68216	0.87418	0.999997	1137	3	0.41966	6.5254e-05	0.0005623	0.140736	7	8	0.41966
NonTargeting_Human_0697	1	0.68226	0.68292	0.999997	1138	0	0.22889	0.31774	0.31708	0.858624	831	0	0.22889
NonTargeting_Human_0304	1	0.683	0.68357	0.999997	1139	0	0.29653	0.317	0.31635	0.858624	830	0	0.29653
NonTargeting_Human_0941	1	0.68308	0.68367	0.999997	1140	0	0.39686	0.31692	0.3163	0.858624	829	0	0.39686
NonTargeting_Human_0737	1	0.68333	0.68395	0.999997	1141	0	0.40212	0.31667	0.31606	0.858624	828	0	0.40212
NonTargeting_Human_0193	1	0.68439	0.68514	0.999997	1142	0	0.30544	0.31561	0.31504	0.858624	826	0	0.30544
NonTargeting_Human_0823	1	0.68521	0.68596	0.999997	1143	0	0.34096	0.31479	0.3142	0.858624	824	0	0.34096
NonTargeting_Human_0990	1	0.68571	0.68643	0.999997	1144	0	0.34309	0.31429	0.31374	0.858624	822	0	0.34309
NonTargeting_Human_0892	1	0.68595	0.68668	0.999997	1145	0	0.57666	0.31405	0.31353	0.858624	821	0	0.57666
SPRN	15	0.68653	0.8758	0.999997	1146	1	0.29728	0.012941	0.065586	0.775699	91	8	0.29728
NonTargeting_Human_0570	1	0.68702	0.68763	0.999997	1147	0	0.29078	0.31298	0.31249	0.858624	820	0	0.29078
GTDC2	15	0.68778	0.87628	0.999997	1148	2	0.263	0.19543	0.46967	0.903587	578	6	0.263
NonTargeting_Human_0719	1	0.68915	0.68975	0.999997	1149	0	0.25081	0.31085	0.31035	0.858624	818	1	0.25081
NonTargeting_Human_0277	1	0.68923	0.68981	0.999997	1150	0	0.2603	0.31077	0.31027	0.858624	817	1	0.2603
NonTargeting_Human_0318	1	0.68948	0.69012	0.999997	1151	0	0.36506	0.31052	0.31001	0.858624	816	1	0.36506
OTC	15	0.69026	0.87727	0.999997	1152	2	0.1023	0.076471	0.25523	0.8469	283	6	0.1023
NXF2	14	0.69047	0.86586	0.999997	1153	2	0.26404	0.24501	0.53532	0.914119	685	6	0.26404
NonTargeting_Human_0923	1	0.69095	0.69161	0.999997	1154	0	0.36156	0.30905	0.30843	0.858624	815	1	0.36156
ACTR6	15	0.69139	0.87765	0.999997	1155	3	0.014363	0.78285	0.92203	0.999997	1507	3	0.014363
FZR1	15	0.69172	0.87775	0.999997	1156	2	-0.0054206	0.49343	0.77075	0.968808	1123	4	-0.0054206
CHMP1A	15	0.6919	0.87781	0.999997	1157	3	0.32641	0.06931	0.23924	0.838356	260	7	0.32641
ARL8A	15	0.69264	0.87805	0.999997	1158	3	-0.066258	0.34751	0.64989	0.952293	881	5	-0.066258
NonTargeting_Human_0950	1	0.69276	0.69338	0.999997	1159	0	0.3685	0.30724	0.30679	0.858624	813	1	0.3685
NonTargeting_Human_0608	1	0.69317	0.69369	0.999997	1160	0	0.27877	0.30683	0.30642	0.858624	812	1	0.27877
ALDH3A2	15	0.69324	0.87833	0.999997	1161	3	0.15541	0.13049	0.36747	0.869083	429	5	0.15541
NonTargeting_Human_0301	1	0.69473	0.69507	0.999997	1162	0	0.61738	0.30527	0.30498	0.856745	811	1	0.61738
NonTargeting_Human_0344	1	0.69514	0.69553	0.999997	1163	0	0.35671	0.30486	0.30458	0.856745	810	1	0.35671
NonTargeting_Human_0898	1	0.69645	0.69687	0.999997	1164	0	0.47529	0.30355	0.30329	0.856745	808	1	0.47529
NonTargeting_Human_0269	1	0.69686	0.69726	0.999997	1165	0	0.22046	0.30314	0.30292	0.856745	806	1	0.22046
NonTargeting_Human_0238	1	0.69711	0.6975	0.999997	1166	0	0.42778	0.30289	0.3027	0.856745	805	1	0.42778
NonTargeting_Human_0929	1	0.69743	0.69785	0.999997	1167	0	0.33614	0.30257	0.30241	0.856745	803	1	0.33614
NonTargeting_Human_0774	1	0.69768	0.6981	0.999997	1168	0	0.35138	0.30232	0.3022	0.856745	802	1	0.35138
MRPL42	15	0.6984	0.88023	0.999997	1169	2	0.21596	0.011623	0.06003	0.772097	84	6	0.21596
NonTargeting_Human_0656	1	0.69981	0.70021	0.999997	1170	0	0.44203	0.30019	0.30005	0.856347	799	1	0.44203
NonTargeting_Human_0706	1	0.70006	0.70048	0.999997	1171	0	0.30941	0.29994	0.29985	0.856347	796	1	0.30941
NonTargeting_Human_0439	1	0.70088	0.7013	0.999997	1172	0	0.16956	0.29912	0.29903	0.856347	795	1	0.16956
CEP97	15	0.70167	0.88147	0.999997	1173	2	0.083102	0.16271	0.4241	0.889402	498	4	0.083102
NonTargeting_Human_0310	1	0.70186	0.70233	0.999997	1174	0	0.47659	0.29814	0.29813	0.856347	793	1	0.47659
DNAJC18	15	0.70199	0.88161	0.999997	1175	3	0.29752	0.035718	0.14594	0.834289	158	7	0.29752
NonTargeting_Human_0011	1	0.70211	0.70256	0.999997	1176	0	0.34807	0.29789	0.29787	0.856347	792	1	0.34807
NonTargeting_Human_0253	1	0.70293	0.7033	0.999997	1177	0	0.56521	0.29707	0.29704	0.856347	791	1	0.56521
NonTargeting_Human_0722	1	0.70342	0.7038	0.999997	1178	0	0.47263	0.29658	0.29655	0.856347	790	1	0.47263
NonTargeting_Human_0988	1	0.70436	0.70485	0.999997	1179	0	0.40772	0.29564	0.29564	0.856347	789	1	0.40772
STAM2	15	0.70437	0.88241	0.999997	1180	2	0.32677	0.029038	0.12472	0.825899	140	5	0.32677
PRDM8	15	0.70476	0.88254	0.999997	1181	3	-0.082325	0.26201	0.55791	0.926051	719	4	-0.082325
NonTargeting_Human_0700	1	0.7049	0.70527	0.999997	1182	0	0.37856	0.2951	0.29497	0.856347	788	1	0.37856
NonTargeting_Human_0376	1	0.70547	0.70586	0.999997	1183	0	0.31112	0.29453	0.29435	0.856347	787	1	0.31112
NonTargeting_Human_0842	1	0.70604	0.70632	0.999997	1184	0	0.33477	0.29396	0.2937	0.856347	785	1	0.33477
NonTargeting_Human_0398	1	0.70662	0.70682	0.999997	1185	0	0.28842	0.29338	0.29303	0.856347	782	1	0.28842
NonTargeting_Human_0285	1	0.70826	0.70835	0.999997	1186	0	0.7541	0.29174	0.2914	0.856347	780	1	0.7541
NonTargeting_Human_0978	1	0.70924	0.70942	0.999997	1187	0	0.56667	0.29076	0.2904	0.856347	779	1	0.56667
TCP10	15	0.70963	0.88448	0.999997	1188	2	0.45381	0.018323	0.088202	0.793132	108	9	0.45381
NonTargeting_Human_0035	1	0.70982	0.70996	0.999997	1189	0	0.30214	0.29018	0.28983	0.856347	777	1	0.30214
NonTargeting_Human_0347	1	0.7099	0.71005	0.999997	1190	0	0.42368	0.2901	0.28976	0.856347	776	1	0.42368
CMAS	15	0.7101	0.88472	0.999997	1191	3	0.29713	0.032866	0.13708	0.834289	148	7	0.29713
NonTargeting_Human_0790	1	0.71014	0.71024	0.999997	1192	0	0.58602	0.28986	0.28951	0.856347	774	1	0.58602
NonTargeting_Human_0876	1	0.71023	0.71033	0.999997	1193	0	0.59548	0.28977	0.28943	0.856347	773	1	0.59548
NonTargeting_Human_0653	1	0.71137	0.71155	0.999997	1194	0	0.33924	0.28863	0.28837	0.856347	771	1	0.33924
NonTargeting_Human_0703	1	0.714	0.71425	0.999997	1195	0	0.62658	0.286	0.28562	0.855386	769	1	0.62658
NonTargeting_Human_0175	1	0.71424	0.71451	0.999997	1196	0	0.34082	0.28576	0.28535	0.855386	768	1	0.34082
NonTargeting_Human_0122	1	0.71433	0.71455	0.999997	1197	0	0.18149	0.28567	0.28528	0.855386	767	1	0.18149
GNB1L	15	0.7144	0.88632	0.999997	1198	3	0.09086	0.86643	0.95387	0.999997	1596	2	0.09086
HSD17B10	15	0.71446	0.88634	0.999997	1199	3	0.18391	0.15182	0.40716	0.875545	477	6	0.18391
NonTargeting_Human_1000	1	0.71597	0.7163	0.999997	1200	0	0.36154	0.28403	0.28362	0.854998	766	1	0.36154
HYPK	15	0.71598	0.88698	0.999997	1201	2	0.81075	0.00060184	0.0047386	0.519372	14	8	0.81075
NARF	15	0.71628	0.8871	0.999997	1202	2	0.42089	0.011707	0.060375	0.772097	85	8	0.42089
NonTargeting_Human_0779	1	0.71629	0.71668	0.999997	1203	0	0.52033	0.28371	0.28323	0.854998	765	1	0.52033
NonTargeting_Human_0204	1	0.71646	0.71681	0.999997	1204	0	0.37532	0.28354	0.2831	0.854998	764	1	0.37532
LRRC8A	15	0.71667	0.88723	0.999997	1205	3	0.42109	0.0012828	0.0089544	0.581041	23	9	0.42109
NonTargeting_Human_0780	1	0.71736	0.71772	0.999997	1206	0	0.59068	0.28264	0.28224	0.854998	763	1	0.59068
CTRL	15	0.71817	0.88784	0.999997	1207	3	0.15916	0.25938	0.55443	0.925988	714	6	0.15916
NonTargeting_Human_0144	1	0.71884	0.71912	0.999997	1208	0	0.4105	0.28116	0.28083	0.854998	760	1	0.4105
SYTL3	15	0.71914	0.8882	0.999997	1209	2	0.36989	0.067666	0.23578	0.838356	258	7	0.36989
NonTargeting_Human_0500	1	0.7204	0.72061	0.999997	1210	0	0.47049	0.2796	0.27935	0.854998	759	1	0.47049
COA4	15	0.72066	0.88877	0.999997	1211	3	0.12573	0.38706	0.68365	0.957587	960	4	0.12573
NonTargeting_Human_0373	1	0.72105	0.72128	0.999997	1212	0	0.24922	0.27895	0.27874	0.854998	758	1	0.24922
NonTargeting_Human_0802	1	0.72113	0.72137	0.999997	1213	0	0.49295	0.27887	0.27867	0.854998	757	1	0.49295
NonTargeting_Human_0588	1	0.72187	0.72219	0.999997	1214	0	0.4144	0.27813	0.2779	0.854998	756	1	0.4144
NonTargeting_Human_0145	1	0.72261	0.72301	0.999997	1215	0	0.62645	0.27739	0.27724	0.854998	752	1	0.62645
NonTargeting_Human_0620	1	0.72327	0.72379	0.999997	1216	0	0.61527	0.27673	0.27663	0.854998	751	1	0.61527
COPS3	15	0.72423	0.89015	0.999997	1217	2	0.29831	0.5774	0.82245	0.977568	1245	4	0.29831
NSFL1C	15	0.7257	0.89076	0.999997	1218	2	0.62955	0.0045693	0.027818	0.714178	49	9	0.62955
NonTargeting_Human_0156	1	0.7263	0.72678	0.999997	1219	0	0.4848	0.2737	0.2735	0.854265	747	1	0.4848
NonTargeting_Human_0875	1	0.72638	0.72684	0.999997	1220	0	0.34589	0.27362	0.27343	0.854265	746	1	0.34589
NonTargeting_Human_0195	1	0.72679	0.72724	0.999997	1221	0	0.36386	0.27321	0.27306	0.854265	745	1	0.36386
NonTargeting_Human_0628	1	0.72761	0.72805	0.999997	1222	0	0.29882	0.27239	0.27233	0.854265	743	1	0.29882
NonTargeting_Human_0059	1	0.72843	0.72877	0.999997	1223	0	0.39972	0.27157	0.27153	0.854265	741	1	0.39972
NonTargeting_Human_0932	1	0.72925	0.72964	0.999997	1224	0	0.65251	0.27075	0.27069	0.854265	738	1	0.65251
NonTargeting_Human_0855	1	0.72942	0.72978	0.999997	1225	0	0.3153	0.27058	0.27048	0.854265	737	1	0.3153
NonTargeting_Human_0308	1	0.73089	0.73128	0.999997	1226	0	0.3978	0.26911	0.2691	0.854265	734	1	0.3978
NonTargeting_Human_0688	1	0.73163	0.73196	0.999997	1227	0	0.42903	0.26837	0.26832	0.854265	732	1	0.42903
NonTargeting_Human_0240	1	0.73294	0.73318	0.999997	1228	0	0.25384	0.26706	0.26706	0.854265	731	1	0.25384
NonTargeting_Human_0996	1	0.73311	0.73334	0.999997	1229	0	0.96546	0.26689	0.2669	0.854265	729	1	0.96546
NonTargeting_Human_0361	1	0.73376	0.73402	0.999997	1230	0	0.33197	0.26624	0.26628	0.854265	727	1	0.33197
LSM7	15	0.73547	0.89462	0.999997	1231	3	0.40057	0.044315	0.17209	0.834289	179	7	0.40057
NonTargeting_Human_0538	1	0.73598	0.73639	0.999997	1232	0	1.0569	0.26402	0.26403	0.854265	724	1	1.0569
NonTargeting_Human_0261	1	0.7363	0.73672	0.999997	1233	0	0.35842	0.2637	0.26363	0.854265	723	1	0.35842
LIMS3	14	0.73699	0.88802	0.999997	1234	2	0.29343	0.08934	0.28147	0.854998	320	6	0.29343
NonTargeting_Human_0358	1	0.7377	0.73813	0.999997	1235	0	0.35833	0.2623	0.26212	0.852027	721	1	0.35833
NonTargeting_Human_0743	1	0.73868	0.73915	0.999997	1236	0	0.31805	0.26132	0.26112	0.850353	717	1	0.31805
EHD2	15	0.73889	0.89587	0.999997	1237	3	0.36249	0.023862	0.10772	0.803055	131	8	0.36249
KBTBD12	15	0.73935	0.89605	0.999997	1238	2	0.13901	0.23552	0.52322	0.91306	662	5	0.13901
NonTargeting_Human_0312	1	0.73942	0.73982	0.999997	1239	0	0.72394	0.26058	0.26039	0.850353	715	1	0.72394
SLAMF6	15	0.74008	0.89641	0.999997	1240	3	0.26641	0.059172	0.21523	0.834289	238	8	0.26641
TMEM183A	15	0.74015	0.89643	0.999997	1241	2	0.30641	0.01961	0.093559	0.793132	113	9	0.30641
NonTargeting_Human_0981	1	0.74073	0.74118	0.999997	1242	0	0.64816	0.25927	0.25923	0.84907	713	1	0.64816
NonTargeting_Human_0209	1	0.74188	0.74229	0.999997	1243	0	0.51173	0.25812	0.25815	0.848559	712	1	0.51173
NonTargeting_Human_0293	1	0.74205	0.74248	0.999997	1244	0	0.45364	0.25795	0.25797	0.848559	711	1	0.45364
HIST2H2AA3	15	0.7422	0.8972	0.999997	1245	3	-0.12851	0.83847	0.9425	0.999997	1564	2	-0.12851
NonTargeting_Human_0349	1	0.74237	0.74289	0.999997	1246	0	0.30906	0.25763	0.25756	0.848559	710	1	0.30906
TAF1B	15	0.74314	0.89754	0.999997	1247	3	0.089134	0.85375	0.94864	0.999997	1579	3	0.089134
NonTargeting_Human_0169	1	0.74344	0.74389	0.999997	1248	0	0.62143	0.25656	0.25639	0.848559	708	1	0.62143
NonTargeting_Human_0170	1	0.74565	0.74615	0.999997	1249	0	0.47704	0.25435	0.25415	0.846506	707	1	0.47704
ADAMTSL1	15	0.74706	0.89929	0.999997	1250	3	0.19548	0.065014	0.22966	0.838356	250	7	0.19548
RAP1GAP	15	0.74733	0.8994	0.999997	1251	3	0.165	0.62586	0.84891	0.987722	1308	4	0.165
NonTargeting_Human_0221	1	0.74762	0.74809	0.999997	1252	0	0.83107	0.25238	0.25222	0.843294	702	1	0.83107
MLLT11	15	0.74934	0.90016	0.999997	1253	3	0.098945	0.25422	0.54777	0.921006	706	5	0.098945
NonTargeting_Human_0219	1	0.74959	0.74985	0.999997	1254	0	0.40047	0.25041	0.25026	0.838356	699	1	0.40047
NonTargeting_Human_0268	1	0.74967	0.74994	0.999997	1255	0	0.50461	0.25033	0.25017	0.838356	698	1	0.50461
B4GALT2	15	0.74968	0.9003	0.999997	1256	2	-0.040131	0.93734	0.97553	0.999997	1666	2	-0.040131
NonTargeting_Human_0883	1	0.75025	0.75051	0.999997	1257	0	0.93432	0.24975	0.24962	0.838356	695	1	0.93432
RALGAPA2	15	0.75081	0.90077	0.999997	1258	3	0.12315	0.11015	0.32619	0.865285	380	5	0.12315
NonTargeting_Human_0079	1	0.75098	0.75121	0.999997	1259	0	0.40938	0.24902	0.24892	0.838356	694	1	0.40938
NonTargeting_Human_0930	1	0.75164	0.75194	0.999997	1260	0	0.31625	0.24836	0.24832	0.838356	693	1	0.31625
NonTargeting_Human_0171	1	0.75213	0.7525	0.999997	1261	0	0.36391	0.24787	0.24787	0.838356	692	1	0.36391
NonTargeting_Human_0120	1	0.7532	0.75352	0.999997	1262	0	0.35624	0.2468	0.24678	0.838356	691	1	0.35624
NonTargeting_Human_0864	1	0.75336	0.7537	0.999997	1263	0	0.36952	0.24664	0.24659	0.838356	690	1	0.36952
NonTargeting_Human_0480	1	0.75369	0.75401	0.999997	1264	0	0.28628	0.24631	0.24623	0.838356	688	1	0.28628
NonTargeting_Human_0708	1	0.7541	0.75446	0.999997	1265	0	0.56625	0.2459	0.24585	0.838356	687	1	0.56625
CCDC43	15	0.75486	0.90257	0.999997	1266	2	0.38847	0.028677	0.12356	0.825899	137	8	0.38847
NonTargeting_Human_0086	1	0.75492	0.7553	0.999997	1267	0	0.28415	0.24508	0.24515	0.838356	686	1	0.28415
NonTargeting_Human_0394	1	0.75525	0.75559	0.999997	1268	0	0.34792	0.24475	0.24486	0.838356	684	1	0.34792
EPN1	15	0.75588	0.90299	0.999997	1269	2	0.4559	0.0076581	0.042393	0.739861	67	9	0.4559
NonTargeting_Human_0215	1	0.75672	0.75718	0.999997	1270	0	0.53111	0.24328	0.24322	0.838356	682	1	0.53111
NonTargeting_Human_0669	1	0.75746	0.75793	0.999997	1271	0	0.49165	0.24254	0.24243	0.838356	680	1	0.49165
NonTargeting_Human_0497	1	0.75771	0.75811	0.999997	1272	0	0.3863	0.24229	0.24221	0.838356	679	1	0.3863
NonTargeting_Human_0916	1	0.75804	0.75843	0.999997	1273	0	0.40511	0.24196	0.24188	0.838356	678	1	0.40511
NonTargeting_Human_0353	1	0.7582	0.75855	0.999997	1274	0	0.59002	0.2418	0.24173	0.838356	677	1	0.59002
NonTargeting_Human_0096	1	0.76009	0.76049	0.999997	1275	0	0.4295	0.23991	0.23982	0.838356	671	1	0.4295
NonTargeting_Human_0550	1	0.76041	0.76081	0.999997	1276	0	0.53268	0.23959	0.23946	0.838356	670	1	0.53268
NonTargeting_Human_0773	1	0.76099	0.76134	0.999997	1277	0	0.51811	0.23901	0.2389	0.838356	669	1	0.51811
NonTargeting_Human_0970	1	0.76197	0.7623	0.999997	1278	0	1.2509	0.23803	0.23798	0.838356	667	1	1.2509
NonTargeting_Human_0560	1	0.76337	0.76366	0.999997	1279	0	0.87117	0.23663	0.2366	0.838356	665	1	0.87117
NonTargeting_Human_0574	1	0.76345	0.76372	0.999997	1280	0	0.63992	0.23655	0.23653	0.838356	664	1	0.63992
NonTargeting_Human_0192	1	0.76386	0.76413	0.999997	1281	0	0.46864	0.23614	0.23605	0.838356	663	1	0.46864
RAB23	14	0.76419	0.90151	0.999997	1282	3	0.048898	0.3411	0.63323	0.944188	866	5	0.048898
NonTargeting_Human_0531	1	0.76624	0.76669	0.999997	1283	0	0.49029	0.23376	0.23378	0.838356	660	1	0.49029
NonTargeting_Human_0962	1	0.76632	0.76678	0.999997	1284	0	0.49048	0.23368	0.23368	0.838356	659	1	0.49048
ABHD14B	15	0.76636	0.9072	0.999997	1285	2	0.086595	0.71032	0.89349	0.999997	1410	4	0.086595
NonTargeting_Human_0163	1	0.76911	0.7696	0.999997	1286	0	0.35741	0.23089	0.23097	0.838356	655	1	0.35741
NonTargeting_Human_0224	1	0.7696	0.77003	0.999997	1287	0	0.54747	0.2304	0.23033	0.838356	654	1	0.54747
NonTargeting_Human_0465	1	0.76993	0.77035	0.999997	1288	0	0.43118	0.23007	0.23004	0.838356	653	1	0.43118
NonTargeting_Human_0572	1	0.77009	0.77054	0.999997	1289	0	0.4273	0.22991	0.22991	0.838356	652	1	0.4273
NonTargeting_Human_0630	1	0.77026	0.77073	0.999997	1290	0	0.38729	0.22974	0.22976	0.838356	650	1	0.38729
NonTargeting_Human_0327	1	0.77181	0.77233	0.999997	1291	0	0.49775	0.22819	0.22826	0.838356	649	1	0.49775
NonTargeting_Human_0841	1	0.77214	0.77266	0.999997	1292	0	0.98086	0.22786	0.2278	0.838356	648	1	0.98086
NonTargeting_Human_0472	1	0.77239	0.77292	0.999997	1293	0	0.73196	0.22761	0.22757	0.838356	647	1	0.73196
NonTargeting_Human_0186	1	0.77247	0.773	0.999997	1294	0	0.58175	0.22753	0.22748	0.838356	646	1	0.58175
LAMTOR4	15	0.77266	0.90985	0.999997	1295	3	0.47889	0.0025872	0.016561	0.681238	32	9	0.47889
NonTargeting_Human_0179	1	0.77313	0.77363	0.999997	1296	0	0.62084	0.22687	0.22677	0.838356	644	1	0.62084
CCDC22	15	0.77395	0.91033	0.999997	1297	3	0.16192	0.13129	0.36913	0.869083	432	5	0.16192
NonTargeting_Human_0969	1	0.77403	0.7745	0.999997	1298	0	0.69001	0.22597	0.22582	0.838356	642	1	0.69001
NonTargeting_Human_0123	1	0.77444	0.77492	0.999997	1299	0	0.33121	0.22556	0.2254	0.838356	641	1	0.33121
NonTargeting_Human_0200	1	0.77509	0.77554	0.999997	1300	0	0.47214	0.22491	0.22465	0.838356	639	1	0.47214
NonTargeting_Human_0573	1	0.77616	0.77672	0.999997	1301	0	0.47801	0.22384	0.22348	0.838356	638	1	0.47801
NonTargeting_Human_0181	1	0.77739	0.77807	0.999997	1302	0	0.43577	0.22261	0.22231	0.838356	635	1	0.43577
NonTargeting_Human_0840	1	0.77846	0.77906	0.999997	1303	0	0.34497	0.22154	0.22128	0.838356	634	1	0.34497
NonTargeting_Human_0770	1	0.77944	0.78006	0.999997	1304	0	0.52742	0.22056	0.22024	0.838356	632	1	0.52742
NonTargeting_Human_0019	1	0.78067	0.78135	0.999997	1305	0	0.41883	0.21933	0.2192	0.838356	631	1	0.41883
NonTargeting_Human_0891	1	0.78092	0.78159	0.999997	1306	0	0.37183	0.21908	0.2189	0.838356	629	1	0.37183
NonTargeting_Human_0226	1	0.78149	0.78217	0.999997	1307	0	0.4596	0.21851	0.21838	0.838356	628	1	0.4596
ORMDL3	15	0.78223	0.91393	0.999997	1308	3	0.25173	0.04311	0.16852	0.834289	177	8	0.25173
NonTargeting_Human_0865	1	0.78371	0.78441	0.999997	1309	0	0.44677	0.21629	0.21605	0.834289	627	1	0.44677
SIN3B	15	0.78377	0.91456	0.999997	1310	2	0.42618	0.050035	0.18842	0.834289	197	8	0.42618
NonTargeting_Human_0018	1	0.78379	0.78449	0.999997	1311	0	0.45914	0.21621	0.21595	0.834289	626	1	0.45914
NonTargeting_Human_0017	1	0.7842	0.78488	0.999997	1312	0	0.40442	0.2158	0.21558	0.834289	625	1	0.40442
GSK3B	15	0.78465	0.91492	0.999997	1313	3	0.12176	0.03449	0.142	0.834289	154	4	0.12176
NonTargeting_Human_0524	1	0.78485	0.78551	0.999997	1314	0	0.48898	0.21515	0.21485	0.834289	624	1	0.48898
NonTargeting_Human_0321	1	0.78567	0.78641	0.999997	1315	0	0.41859	0.21433	0.21407	0.834289	622	1	0.41859
NonTargeting_Human_0606	1	0.78633	0.78702	0.999997	1316	0	0.80943	0.21367	0.21337	0.834289	621	1	0.80943
NonTargeting_Human_0476	1	0.78641	0.78707	0.999997	1317	0	0.7158	0.21359	0.21328	0.834289	620	1	0.7158
NonTargeting_Human_0090	1	0.78649	0.78712	0.999997	1318	0	0.48768	0.21351	0.2132	0.834289	619	1	0.48768
NonTargeting_Human_0903	1	0.78682	0.7875	0.999997	1319	0	0.55754	0.21318	0.21287	0.834289	618	1	0.55754
NonTargeting_Human_0637	1	0.78715	0.78781	0.999997	1320	0	0.37663	0.21285	0.2125	0.834289	617	1	0.37663
NonTargeting_Human_0522	1	0.78723	0.78788	0.999997	1321	0	0.58427	0.21277	0.2124	0.834289	615	1	0.58427
NonTargeting_Human_0678	1	0.78731	0.788	0.999997	1322	0	0.56223	0.21269	0.21232	0.834289	614	1	0.56223
NonTargeting_Human_0525	1	0.78764	0.78834	0.999997	1323	0	0.39754	0.21236	0.212	0.834289	613	1	0.39754
NonTargeting_Human_0994	1	0.78797	0.78863	0.999997	1324	0	0.49629	0.21203	0.21167	0.834289	611	1	0.49629
NonTargeting_Human_0043	1	0.7883	0.78892	0.999997	1325	0	0.30041	0.2117	0.21134	0.834289	610	1	0.30041
GP1BB	15	0.78844	0.91656	0.999997	1326	2	0.24721	0.48949	0.76756	0.968808	1114	5	0.24721
CEBPA	15	0.78844	0.91656	0.999997	1327	3	0.24784	0.10543	0.31667	0.858624	367	6	0.24784
NonTargeting_Human_0607	1	0.79109	0.79161	0.999997	1328	0	0.95291	0.20891	0.20858	0.834289	603	1	0.95291
NonTargeting_Human_0198	1	0.79191	0.79239	0.999997	1329	0	0.34522	0.20809	0.20792	0.834289	602	1	0.34522
NonTargeting_Human_0998	1	0.79264	0.79307	0.999997	1330	0	0.49606	0.20736	0.20722	0.834289	601	1	0.49606
NonTargeting_Human_0965	1	0.79297	0.79335	0.999997	1331	0	0.7816	0.20703	0.20692	0.834289	599	1	0.7816
NonTargeting_Human_0331	1	0.79478	0.79533	0.999997	1332	0	0.57877	0.20522	0.2051	0.834289	598	1	0.57877
NonTargeting_Human_0609	1	0.7951	0.79568	0.999997	1333	0	0.38761	0.2049	0.20487	0.834289	597	1	0.38761
CTCF	15	0.79646	0.92021	0.999997	1334	2	0.31705	0.081579	0.26632	0.854265	298	6	0.31705
NonTargeting_Human_0335	1	0.79724	0.79784	0.999997	1335	0	0.45054	0.20276	0.20255	0.834289	596	1	0.45054
NonTargeting_Human_0567	1	0.79732	0.79789	0.999997	1336	0	0.41611	0.20268	0.20244	0.834289	595	1	0.41611
KCTD5	15	0.79792	0.92085	0.999997	1337	3	0.098431	0.10196	0.30955	0.858624	357	6	0.098431
NonTargeting_Human_0546	1	0.79797	0.79858	0.999997	1338	0	0.46558	0.20203	0.20176	0.834289	594	1	0.46558
NonTargeting_Human_0629	1	0.79822	0.79879	0.999997	1339	0	0.46428	0.20178	0.20155	0.834289	593	1	0.46428
KDM3B	15	0.79891	0.9213	0.999997	1340	3	0.025374	0.52296	0.79404	0.970431	1174	4	0.025374
FAM156A	15	0.79914	0.92142	0.999997	1341	1	0.32059	0.046335	0.17802	0.834289	188	8	0.32059
ZNF143	15	0.79977	0.92163	0.999997	1342	3	-0.1505	0.72163	0.89933	0.999997	1428	2	-0.1505
NonTargeting_Human_0448	1	0.79986	0.80045	0.999997	1343	0	0.54901	0.20014	0.19987	0.834289	588	1	0.54901
NonTargeting_Human_0925	1	0.80035	0.80087	0.999997	1344	0	0.84688	0.19965	0.19932	0.834289	587	1	0.84688
NonTargeting_Human_0089	1	0.8006	0.80117	0.999997	1345	0	0.32695	0.1994	0.19909	0.834289	586	1	0.32695
STK11	15	0.80088	0.92211	0.999997	1346	3	-0.034822	0.064355	0.22827	0.838356	248	6	-0.034822
NonTargeting_Human_0405	1	0.80134	0.8019	0.999997	1347	0	0.45641	0.19866	0.19838	0.834289	585	1	0.45641
KAT8	15	0.80166	0.92243	0.999997	1348	3	0.18108	0.17485	0.44137	0.891906	531	5	0.18108
NonTargeting_Human_0306	1	0.80166	0.8022	0.999997	1349	0	0.49182	0.19834	0.19806	0.834289	584	1	0.49182
NonTargeting_Human_0015	1	0.80232	0.8029	0.999997	1350	0	0.43688	0.19768	0.1974	0.834289	582	1	0.43688
ATP5O	15	0.80342	0.92314	0.999997	1351	3	-0.032634	0.093645	0.29229	0.856347	333	5	-0.032634
NonTargeting_Human_0576	1	0.80445	0.80494	0.999997	1352	0	1.3573	0.19555	0.19521	0.834289	579	1	1.3573
EFCAB5	15	0.80457	0.92364	0.999997	1353	1	0.41072	0.011885	0.061138	0.775699	86	9	0.41072
NonTargeting_Human_0880	1	0.8047	0.80519	0.999997	1354	0	0.66081	0.1953	0.195	0.834289	577	1	0.66081
YME1L1	15	0.80591	0.9243	0.999997	1355	2	0.13209	0.25175	0.54446	0.921006	701	5	0.13209
NonTargeting_Human_0646	1	0.80593	0.80637	0.999997	1356	0	0.49595	0.19407	0.19387	0.834289	574	1	0.49595
NonTargeting_Human_0733	1	0.80626	0.80662	0.999997	1357	0	0.528	0.19374	0.19359	0.834289	573	1	0.528
IREB2	15	0.80671	0.92467	0.999997	1358	2	0.18109	0.00061488	0.0048346	0.519372	15	6	0.18109
NonTargeting_Human_0614	1	0.80724	0.80753	0.999997	1359	0	0.60931	0.19276	0.19256	0.834289	570	1	0.60931
NonTargeting_Human_0048	1	0.80757	0.80784	0.999997	1360	0	0.58957	0.19243	0.19229	0.834289	569	1	0.58957
NonTargeting_Human_0003	1	0.80913	0.80911	0.999997	1361	0	0.73849	0.19087	0.19064	0.834289	568	1	0.73849
NonTargeting_Human_0422	1	0.80921	0.80923	0.999997	1362	0	0.47234	0.19079	0.19059	0.834289	567	1	0.47234
NonTargeting_Human_0298	1	0.80946	0.80948	0.999997	1363	0	0.64291	0.19054	0.19036	0.834289	566	1	0.64291
NonTargeting_Human_0980	1	0.81036	0.81038	0.999997	1364	0	0.69093	0.18964	0.18951	0.834289	564	1	0.69093
NonTargeting_Human_0747	1	0.81069	0.81069	0.999997	1365	0	0.5608	0.18931	0.18922	0.834289	563	1	0.5608
PDHX	15	0.81127	0.92683	0.999997	1366	3	0.11439	0.15908	0.41872	0.886061	490	6	0.11439
NonTargeting_Human_0207	1	0.81134	0.81135	0.999997	1367	0	0.56387	0.18866	0.18859	0.834289	562	1	0.56387
NonTargeting_Human_0940	1	0.81183	0.81177	0.999997	1368	0	0.85635	0.18817	0.18809	0.834289	560	1	0.85635
NonTargeting_Human_0316	1	0.81208	0.812	0.999997	1369	0	0.56067	0.18792	0.18787	0.834289	559	1	0.56067
NonTargeting_Human_0388	1	0.81241	0.81237	0.999997	1370	0	0.42324	0.18759	0.18755	0.834289	558	1	0.42324
NonTargeting_Human_0785	1	0.81265	0.81264	0.999997	1371	0	0.5619	0.18735	0.18727	0.834289	557	1	0.5619
GPBP1L1	15	0.81353	0.92792	0.999997	1372	3	0.15985	0.51578	0.7884	0.970431	1162	4	0.15985
DGKK	15	0.81361	0.92794	0.999997	1373	2	0.028487	0.4908	0.76853	0.968808	1119	2	0.028487
NonTargeting_Human_0564	1	0.81388	0.81387	0.999997	1374	0	0.47689	0.18612	0.18591	0.834289	555	1	0.47689
WDR33	15	0.81409	0.92814	0.999997	1375	3	0.41284	0.03568	0.14579	0.834289	157	8	0.41284
NonTargeting_Human_0427	1	0.81479	0.81465	0.999997	1376	0	0.55181	0.18521	0.185	0.834289	553	1	0.55181
NonTargeting_Human_0189	1	0.81536	0.81518	0.999997	1377	0	0.48646	0.18464	0.18441	0.834289	551	1	0.48646
NonTargeting_Human_0165	1	0.81552	0.81533	0.999997	1378	0	0.45869	0.18448	0.18425	0.834289	550	1	0.45869
DNAJC4	15	0.81567	0.92889	0.999997	1379	2	-0.02163	0.043813	0.17065	0.834289	178	5	-0.02163
EGLN2	15	0.81629	0.92923	0.999997	1380	3	0.37909	0.014828	0.073559	0.779674	98	9	0.37909
SPNS1	15	0.81724	0.9297	0.999997	1381	3	0.48471	0.0024014	0.015521	0.681238	31	9	0.48471
NonTargeting_Human_0805	1	0.81741	0.81728	0.999997	1382	0	0.48849	0.18259	0.18259	0.834289	546	1	0.48849
NonTargeting_Human_0421	1	0.81798	0.81787	0.999997	1383	0	0.52669	0.18202	0.18204	0.834289	544	1	0.52669
SPINT1	15	0.81832	0.93006	0.999997	1384	3	0.24365	0.12162	0.34934	0.869083	407	7	0.24365
NonTargeting_Human_0223	1	0.81856	0.81838	0.999997	1385	0	0.61535	0.18144	0.18144	0.834289	541	1	0.61535
NonTargeting_Human_0425	1	0.82085	0.8206	0.999997	1386	0	0.41362	0.17915	0.17931	0.834289	540	1	0.41362
NonTargeting_Human_0977	1	0.82167	0.82141	0.999997	1387	0	0.57167	0.17833	0.17858	0.834289	539	1	0.57167
NonTargeting_Human_0680	1	0.82176	0.82151	0.999997	1388	0	0.66478	0.17824	0.1785	0.834289	538	1	0.66478
TAF10	15	0.82233	0.93181	0.999997	1389	2	0.16305	0.089762	0.28402	0.854998	322	6	0.16305
TMEM253	15	0.82273	0.93203	0.999997	1390	2	0.14567	0.64245	0.8579	0.990801	1326	4	0.14567
NonTargeting_Human_0683	1	0.82323	0.823	0.999997	1391	0	0.71083	0.17677	0.17711	0.834289	537	1	0.71083
ABCG5	15	0.82332	0.93226	0.999997	1392	2	0.19255	0.40955	0.70253	0.962343	997	5	0.19255
NonTargeting_Human_0516	1	0.82356	0.82336	0.999997	1393	0	0.72524	0.17644	0.17677	0.834289	535	1	0.72524
NonTargeting_Human_0205	1	0.82405	0.82389	0.999997	1394	0	0.62717	0.17595	0.17624	0.834289	534	1	0.62717
NonTargeting_Human_0136	1	0.82454	0.8244	0.999997	1395	0	0.85426	0.17546	0.17585	0.834289	533	1	0.85426
NonTargeting_Human_0765	1	0.82487	0.82471	0.999997	1396	0	0.50443	0.17513	0.17555	0.834289	532	1	0.50443
NonTargeting_Human_0763	1	0.82553	0.82544	0.999997	1397	0	0.6694	0.17447	0.17498	0.834289	530	1	0.6694
NonTargeting_Human_0461	1	0.82692	0.82663	0.999997	1398	0	0.47142	0.17308	0.17352	0.834289	528	1	0.47142
NonTargeting_Human_0738	1	0.82774	0.82752	0.999997	1399	0	1.0268	0.17226	0.17265	0.834289	527	1	1.0268
RHOT2	15	0.82831	0.93463	0.999997	1400	2	0.16287	0.094981	0.29511	0.856347	338	7	0.16287
NonTargeting_Human_0151	1	0.82832	0.8281	0.999997	1401	0	0.55068	0.17168	0.17207	0.834289	526	1	0.55068
NonTargeting_Human_0956	1	0.82865	0.82844	0.999997	1402	0	0.64703	0.17135	0.17173	0.834289	525	1	0.64703
NonTargeting_Human_0693	1	0.82889	0.82862	0.999997	1403	0	0.58	0.17111	0.17147	0.834289	524	1	0.58
PTCHD4	15	0.82899	0.93497	0.999997	1404	2	0.12458	0.014139	0.070672	0.779674	96	6	0.12458
HAVCR1	15	0.8291	0.93504	0.999997	1405	3	0.05048	0.07831	0.25928	0.84907	290	5	0.05048
NonTargeting_Human_0565	1	0.82996	0.8297	0.999997	1406	0	0.44232	0.17004	0.17044	0.834289	520	1	0.44232
NonTargeting_Human_0452	1	0.83086	0.83057	0.999997	1407	0	0.77462	0.16914	0.16958	0.834289	516	1	0.77462
NonTargeting_Human_0803	1	0.83102	0.83071	0.999997	1408	0	0.65195	0.16898	0.16944	0.834289	515	1	0.65195
NonTargeting_Human_0926	1	0.83111	0.83074	0.999997	1409	0	1.2461	0.16889	0.16938	0.834289	512	1	1.2461
NonTargeting_Human_0330	1	0.83193	0.83167	0.999997	1410	0	0.59527	0.16807	0.16857	0.834289	510	1	0.59527
WDR13	15	0.83223	0.93647	0.999997	1411	3	0.058307	0.15582	0.41394	0.881555	485	5	0.058307
PRR3	15	0.83225	0.93648	0.999997	1412	2	0.35516	0.052512	0.19591	0.834289	209	8	0.35516
NonTargeting_Human_0589	1	0.83365	0.8333	0.999997	1413	0	0.52435	0.16635	0.16686	0.834289	507	1	0.52435
NonTargeting_Human_0083	1	0.83455	0.83436	0.999997	1414	0	0.49439	0.16545	0.16597	0.834289	506	1	0.49439
SNAI1	15	0.83481	0.93783	0.999997	1415	3	0.28864	0.24381	0.53418	0.91306	683	6	0.28864
NonTargeting_Human_0239	1	0.83512	0.83481	0.999997	1416	0	0.60179	0.16488	0.16541	0.834289	505	1	0.60179
NonTargeting_Human_0884	1	0.83553	0.83526	0.999997	1417	0	0.66572	0.16447	0.165	0.834289	504	1	0.66572
NonTargeting_Human_0549	1	0.83562	0.83533	0.999997	1418	0	0.82725	0.16438	0.16493	0.834289	503	1	0.82725
NonTargeting_Human_0415	1	0.83594	0.83569	0.999997	1419	0	0.69295	0.16406	0.16455	0.834289	502	1	0.69295
NonTargeting_Human_0666	1	0.83652	0.83628	0.999997	1420	0	0.62278	0.16348	0.16398	0.834289	499	1	0.62278
ZBTB37	15	0.83702	0.93887	0.999997	1421	3	0.0072219	0.41302	0.70547	0.963096	1001	4	0.0072219
ELF4	15	0.83824	0.9394	0.999997	1422	2	0.11947	0.46146	0.74473	0.968808	1066	4	0.11947
ORMDL1	15	0.83824	0.9394	0.999997	1423	1	0.22876	0.23993	0.52903	0.91306	672	6	0.22876
NonTargeting_Human_0814	1	0.83832	0.83821	0.999997	1424	0	0.71711	0.16168	0.16226	0.834289	497	1	0.71711
NonTargeting_Human_0832	1	0.83873	0.83858	0.999997	1425	0	0.56025	0.16127	0.16191	0.834289	496	1	0.56025
NonTargeting_Human_0580	1	0.83922	0.83913	0.999997	1426	0	0.64142	0.16078	0.16135	0.834289	495	1	0.64142
NonTargeting_Human_0168	1	0.8398	0.83976	0.999997	1427	0	0.68861	0.1602	0.16078	0.834289	494	1	0.68861
NonTargeting_Human_0396	1	0.83996	0.83994	0.999997	1428	0	0.50479	0.16004	0.16063	0.834289	493	1	0.50479
NonTargeting_Human_0053	1	0.84029	0.84026	0.999997	1429	0	0.5845	0.15971	0.1603	0.834289	492	1	0.5845
NonTargeting_Human_0597	1	0.84078	0.8408	0.999997	1430	0	0.58344	0.15922	0.15981	0.834289	491	1	0.58344
NonTargeting_Human_0636	1	0.84168	0.84169	0.999997	1431	0	0.95538	0.15832	0.15899	0.834289	489	1	0.95538
NonTargeting_Human_0647	1	0.84177	0.84178	0.999997	1432	0	0.67314	0.15823	0.15887	0.834289	488	1	0.67314
ABCB4	15	0.84202	0.94116	0.999997	1433	1	-0.0017933	0.54973	0.80792	0.973807	1208	4	-0.0017933
NonTargeting_Human_0601	1	0.84259	0.84266	0.999997	1434	0	0.62687	0.15741	0.1579	0.834289	487	1	0.62687
NonTargeting_Human_0520	1	0.84316	0.84328	0.999997	1435	0	0.67459	0.15684	0.15734	0.834289	486	1	0.67459
PIGS	15	0.84466	0.94242	0.999997	1436	3	0.36714	0.007966	0.043919	0.739861	70	7	0.36714
NonTargeting_Human_0603	1	0.84529	0.84523	0.999997	1437	0	0.50835	0.15471	0.15536	0.834289	484	1	0.50835
NonTargeting_Human_0634	1	0.8457	0.84575	0.999997	1438	0	0.63472	0.1543	0.15498	0.834289	483	1	0.63472
NonTargeting_Human_0507	1	0.84595	0.84597	0.999997	1439	0	0.63333	0.15405	0.15476	0.834289	482	1	0.63333
SLC38A5	15	0.84679	0.9435	0.999997	1440	1	0.27733	0.10488	0.3156	0.858624	363	7	0.27733
NonTargeting_Human_0036	1	0.84742	0.84749	0.999997	1441	0	0.60552	0.15258	0.15334	0.834289	480	1	0.60552
NonTargeting_Human_0798	1	0.84751	0.84759	0.999997	1442	0	0.52218	0.15249	0.15326	0.834289	479	1	0.52218
NonTargeting_Human_0314	1	0.84849	0.84847	0.999997	1443	0	0.80343	0.15151	0.15229	0.834289	476	1	0.80343
NonTargeting_Human_0211	1	0.8489	0.84888	0.999997	1444	0	0.44059	0.1511	0.15198	0.834289	474	1	0.44059
MRP63	15	0.84933	0.9448	0.999997	1445	2	0.34223	0.058659	0.2137	0.834289	236	8	0.34223
AMTN	15	0.8495	0.94489	0.999997	1446	3	0.072796	0.29994	0.60429	0.939157	797	4	0.072796
NonTargeting_Human_0753	1	0.84972	0.84968	0.999997	1447	0	0.65077	0.15028	0.15112	0.834289	472	1	0.65077
NonTargeting_Human_0824	1	0.8498	0.84976	0.999997	1448	0	0.89696	0.1502	0.15103	0.834289	471	1	0.89696
DYNLL1	15	0.84996	0.9451	0.999997	1449	1	0.49175	0.013177	0.066439	0.776007	92	9	0.49175
NonTargeting_Human_0850	1	0.85038	0.85026	0.999997	1450	0	0.55689	0.14962	0.15044	0.834289	470	1	0.55689
NonTargeting_Human_0435	1	0.85177	0.85153	0.999997	1451	0	0.65114	0.14823	0.14907	0.834289	464	1	0.65114
NonTargeting_Human_0894	1	0.85374	0.85351	0.999997	1452	0	0.60105	0.14626	0.14716	0.834289	462	1	0.60105
NonTargeting_Human_0713	1	0.85382	0.85358	0.999997	1453	0	0.65699	0.14618	0.14708	0.834289	461	1	0.65699
NonTargeting_Human_0720	1	0.85522	0.85505	0.999997	1454	0	0.74753	0.14478	0.14584	0.834289	458	1	0.74753
SSX2	15	0.85567	0.94754	0.999997	1455	2	0.17321	0.6307	0.85148	0.98952	1313	4	0.17321
NonTargeting_Human_0568	1	0.85636	0.85643	0.999997	1456	0	0.68758	0.14364	0.14476	0.834289	455	1	0.68758
NonTargeting_Human_0297	1	0.85653	0.85655	0.999997	1457	0	0.4021	0.14347	0.14464	0.834289	454	1	0.4021
NonTargeting_Human_0509	1	0.85686	0.85686	0.999997	1458	0	0.69828	0.14314	0.14432	0.834289	453	1	0.69828
INO80D	15	0.85733	0.9479	0.999997	1459	2	-0.034963	0.88268	0.96066	0.999997	1611	3	-0.034963
NonTargeting_Human_0342	1	0.85743	0.85749	0.999997	1460	0	0.70243	0.14257	0.14374	0.834289	452	1	0.70243
STX10	15	0.85911	0.94834	0.999997	1461	2	-0.043792	0.51678	0.78919	0.970431	1164	4	-0.043792
NonTargeting_Human_0754	1	0.85964	0.85964	0.999997	1462	0	0.52663	0.14036	0.1414	0.834289	448	1	0.52663
SMOC1	15	0.8599	0.94854	0.999997	1463	2	0.1632	0.055802	0.2054	0.834289	223	6	0.1632
NonTargeting_Human_0966	1	0.8603	0.86037	0.999997	1464	0	0.87518	0.1397	0.14078	0.834289	447	1	0.87518
MRPL33	15	0.86069	0.94871	0.999997	1465	1	0.15445	0.081794	0.26675	0.854265	299	7	0.15445
NonTargeting_Human_0337	1	0.86235	0.86239	0.999997	1466	0	0.44561	0.13765	0.13872	0.834289	446	1	0.44561
VOPP1	15	0.86301	0.94932	0.999997	1467	2	0.077307	0.22115	0.50452	0.909717	633	5	0.077307
NonTargeting_Human_0399	1	0.86358	0.86368	0.999997	1468	0	0.53082	0.13642	0.13742	0.834289	445	1	0.53082
PPAT	15	0.8637	0.94947	0.999997	1469	2	0.1893	0.2985	0.60264	0.939157	794	6	0.1893
NonTargeting_Human_0795	1	0.86596	0.86594	0.999997	1470	0	0.93302	0.13404	0.13513	0.834289	443	1	0.93302
NonTargeting_Human_0045	1	0.86661	0.86662	0.999997	1471	0	0.6239	0.13339	0.13447	0.834289	441	1	0.6239
NonTargeting_Human_0896	1	0.86686	0.86684	0.999997	1472	0	0.67129	0.13314	0.13427	0.834289	440	1	0.67129
NonTargeting_Human_0134	1	0.86801	0.86802	0.999997	1473	0	0.50335	0.13199	0.13311	0.834289	434	1	0.50335
NonTargeting_Human_0363	1	0.8685	0.8684	0.999997	1474	0	0.80479	0.1315	0.13257	0.834289	433	1	0.80479
NonTargeting_Human_0485	1	0.86916	0.86901	0.999997	1475	0	0.88202	0.13084	0.13189	0.834167	431	1	0.88202
MED9	15	0.87033	0.95141	0.999997	1476	1	0.2694	0.16646	0.42988	0.889402	508	6	0.2694
NonTargeting_Human_0541	1	0.87055	0.87033	0.999997	1477	0	0.61198	0.12945	0.13053	0.82858	428	1	0.61198
NonTargeting_Human_0256	1	0.87104	0.87087	0.999997	1478	0	0.6558	0.12896	0.13004	0.828461	427	1	0.6558
NonTargeting_Human_0457	1	0.87121	0.87101	0.999997	1479	0	0.89994	0.12879	0.12989	0.828461	426	1	0.89994
SETDB1	15	0.87178	0.9518	0.999997	1480	2	0.14616	0.16893	0.43322	0.889402	513	3	0.14616
NonTargeting_Human_0594	1	0.87227	0.87207	0.999997	1481	0	0.78605	0.12773	0.12869	0.825899	423	1	0.78605
NonTargeting_Human_0741	1	0.87268	0.87247	0.999997	1482	0	0.60468	0.12732	0.12834	0.825899	421	1	0.60468
NonTargeting_Human_0544	1	0.87309	0.8729	0.999997	1483	0	0.80215	0.12691	0.12801	0.825899	420	1	0.80215
NonTargeting_Human_0844	1	0.87342	0.87322	0.999997	1484	0	0.78571	0.12658	0.12773	0.825899	419	1	0.78571
NonTargeting_Human_0255	1	0.87375	0.87354	0.999997	1485	0	0.68274	0.12625	0.12746	0.825899	417	1	0.68274
NonTargeting_Human_0115	1	0.87424	0.87402	0.999997	1486	0	0.66242	0.12576	0.12691	0.825899	415	1	0.66242
UBE2L3	15	0.87482	0.95269	0.999997	1487	2	0.53018	0.055812	0.20544	0.834289	224	8	0.53018
MTA2	15	0.875	0.95274	0.999997	1488	1	0.44275	0.0059907	0.034741	0.72114	58	9	0.44275
NonTargeting_Human_0799	1	0.87523	0.87506	0.999997	1489	0	1.3579	0.12477	0.12597	0.825899	413	1	1.3579
NonTargeting_Human_0695	1	0.87531	0.87513	0.999997	1490	0	0.72072	0.12469	0.12586	0.825899	412	1	0.72072
NonTargeting_Human_0971	1	0.87621	0.87595	0.999997	1491	0	0.88867	0.12379	0.12504	0.825899	411	1	0.88867
FAM219B	15	0.87968	0.95386	0.999997	1492	2	0.20611	0.21919	0.5017	0.909002	630	5	0.20611
WDR18	15	0.88054	0.95406	0.999997	1493	2	0.24683	0.30321	0.60802	0.939367	807	6	0.24683
NonTargeting_Human_0711	1	0.8808	0.88061	0.999997	1494	0	0.71853	0.1192	0.12043	0.817772	404	1	0.71853
NonTargeting_Human_0391	1	0.88113	0.88103	0.999997	1495	0	0.71196	0.11887	0.12011	0.817772	403	1	0.71196
FRG2C	15	0.88154	0.95433	0.999997	1496	2	0.1413	0.0068021	0.038493	0.72114	62	6	0.1413
NonTargeting_Human_0063	1	0.88203	0.88206	0.999997	1497	0	0.73383	0.11797	0.11923	0.816	402	1	0.73383
NonTargeting_Human_0469	1	0.88244	0.88239	0.999997	1498	0	0.55906	0.11756	0.11878	0.816	401	1	0.55906
NOP16	15	0.88255	0.95456	0.999997	1499	2	0.32506	0.0077427	0.042845	0.739861	68	7	0.32506
NonTargeting_Human_0016	1	0.88302	0.88291	0.999997	1500	0	0.71899	0.11698	0.11814	0.816	400	1	0.71899
NonTargeting_Human_0675	1	0.88318	0.88308	0.999997	1501	0	0.67737	0.11682	0.11797	0.816	399	1	0.67737
PSMD5	15	0.88371	0.95485	0.999997	1502	1	0.25477	0.10355	0.31287	0.858624	360	6	0.25477
NonTargeting_Human_0088	1	0.884	0.88392	0.999997	1503	0	0.65475	0.116	0.11714	0.816	398	1	0.65475
NonTargeting_Human_0502	1	0.88498	0.885	0.999997	1504	0	0.61915	0.11502	0.11624	0.814634	396	1	0.61915
NonTargeting_Human_0645	1	0.88515	0.88519	0.999997	1505	0	0.56793	0.11485	0.11611	0.814634	394	1	0.56793
NonTargeting_Human_0839	1	0.88564	0.88575	0.999997	1506	0	0.84561	0.11436	0.11556	0.814634	392	1	0.84561
CHRNA3	15	0.88616	0.9556	0.999997	1507	1	0.31139	0.15128	0.40593	0.874764	475	7	0.31139
NonTargeting_Human_0759	1	0.88744	0.88768	0.999997	1508	0	0.67245	0.11256	0.11377	0.807011	390	1	0.67245
NonTargeting_Human_0447	1	0.88785	0.88809	0.999997	1509	0	0.70776	0.11215	0.11343	0.807011	388	1	0.70776
NonTargeting_Human_0736	1	0.88835	0.88857	0.999997	1510	0	0.57398	0.11165	0.11297	0.807011	386	1	0.57398
RALB	15	0.88889	0.95634	0.999997	1511	2	0.16987	0.029368	0.12577	0.825899	142	7	0.16987
NonTargeting_Human_0456	1	0.88892	0.8891	0.999997	1512	0	0.63573	0.11108	0.11236	0.807011	384	1	0.63573
NonTargeting_Human_0213	1	0.88933	0.88957	0.999997	1513	0	0.71703	0.11067	0.11198	0.807011	383	1	0.71703
IRF2BP2	15	0.88999	0.95662	0.999997	1514	1	0.13894	0.28257	0.58348	0.926847	762	6	0.13894
NonTargeting_Human_0438	1	0.88999	0.89015	0.999997	1515	0	0.73568	0.11001	0.11143	0.807011	379	1	0.73568
NonTargeting_Human_0135	1	0.89007	0.89022	0.999997	1516	0	0.77958	0.10993	0.11134	0.807011	378	1	0.77958
NonTargeting_Human_0927	1	0.8904	0.89051	0.999997	1517	0	0.8724	0.1096	0.11098	0.807011	377	1	0.8724
OR5AR1	15	0.89116	0.95696	0.999997	1518	2	0.15916	0.68528	0.88016	0.996993	1379	3	0.15916
NonTargeting_Human_0410	1	0.89138	0.89162	0.999997	1519	0	1.2191	0.10862	0.10996	0.807011	375	1	1.2191
NonTargeting_Human_0750	1	0.8922	0.89241	0.999997	1520	0	1.152	0.1078	0.10907	0.806304	373	1	1.152
NonTargeting_Human_0995	1	0.89261	0.89286	0.999997	1521	0	1.0298	0.10739	0.10863	0.806304	371	1	1.0298
NonTargeting_Human_0248	1	0.8936	0.89389	0.999997	1522	0	0.77125	0.1064	0.10757	0.803055	369	1	0.77125
NonTargeting_Human_0152	1	0.89442	0.89471	0.999997	1523	0	0.6056	0.10558	0.1068	0.803055	368	1	0.6056
NonTargeting_Human_0450	1	0.89483	0.89512	0.999997	1524	0	0.51759	0.10517	0.10633	0.803055	366	1	0.51759
NonTargeting_Human_0117	1	0.89491	0.89519	0.999997	1525	0	0.83749	0.10509	0.10625	0.803055	365	1	0.83749
NonTargeting_Human_0648	1	0.89524	0.89552	0.999997	1526	0	0.73872	0.10476	0.10591	0.803055	362	1	0.73872
NonTargeting_Human_0816	1	0.89688	0.89716	0.999997	1527	0	0.62262	0.10312	0.1043	0.803055	359	1	0.62262
NonTargeting_Human_0478	1	0.89925	0.89956	0.999997	1528	0	0.74191	0.10075	0.10199	0.801292	355	1	0.74191
SCYL1	15	0.9	0.95929	0.999997	1529	2	0.33817	0.078939	0.26068	0.850353	293	7	0.33817
NonTargeting_Human_0821	1	0.90089	0.90143	0.999997	1530	0	0.71392	0.099106	0.10005	0.793132	352	1	0.71392
NonTargeting_Human_0160	1	0.90147	0.90195	0.999997	1531	0	0.73587	0.098532	0.09947	0.793132	351	1	0.73587
NonTargeting_Human_0477	1	0.90155	0.90205	0.999997	1532	0	0.98698	0.09845	0.099369	0.793132	350	1	0.98698
NonTargeting_Human_0094	1	0.90262	0.90308	0.999997	1533	0	0.85289	0.097384	0.098244	0.793132	348	1	0.85289
NonTargeting_Human_0690	1	0.90286	0.90326	0.999997	1534	0	0.96464	0.097138	0.097922	0.793132	346	1	0.96464
NonTargeting_Human_0467	1	0.90294	0.90336	0.999997	1535	0	1.1623	0.097056	0.097837	0.793132	345	1	1.1623
MBOAT7	15	0.90304	0.96034	0.999997	1536	2	0.23508	0.032107	0.13458	0.834289	146	6	0.23508
NonTargeting_Human_0578	1	0.9036	0.90399	0.999997	1537	0	1.137	0.0964	0.09717	0.793132	343	1	1.137
NonTargeting_Human_0775	1	0.90393	0.90434	0.999997	1538	0	0.66479	0.096072	0.09686	0.793132	341	1	0.66479
NonTargeting_Human_0582	1	0.90475	0.9051	0.999997	1539	0	1.1048	0.095252	0.096187	0.793132	340	1	1.1048
FRYL	15	0.9048	0.96092	0.999997	1540	1	0.075356	0.24634	0.53755	0.915245	689	6	0.075356
NonTargeting_Human_0283	1	0.90483	0.90522	0.999997	1541	0	0.64153	0.09517	0.096108	0.793132	339	1	0.64153
NFRKB	15	0.90495	0.96099	0.999997	1542	2	0.08	0.065124	0.22994	0.838356	251	6	0.08
NonTargeting_Human_0161	1	0.90508	0.90547	0.999997	1543	0	0.59269	0.094924	0.095825	0.793132	337	1	0.59269
DCAKD	15	0.90521	0.96105	0.999997	1544	2	0.37338	0.0030289	0.019166	0.681238	36	10	0.37338
NonTargeting_Human_0699	1	0.90532	0.9057	0.999997	1545	0	0.99268	0.094678	0.095588	0.793132	336	1	0.99268
CAB39	15	0.90671	0.9615	0.999997	1546	2	0.14583	0.067292	0.23489	0.838356	256	4	0.14583
NonTargeting_Human_0860	1	0.90672	0.90701	0.999997	1547	0	0.88249	0.093284	0.094085	0.793132	332	1	0.88249
NonTargeting_Human_0230	1	0.9068	0.90711	0.999997	1548	0	0.80991	0.093202	0.094	0.793132	331	1	0.80991
NonTargeting_Human_0191	1	0.90827	0.90864	0.999997	1549	0	1.2305	0.091725	0.092463	0.793132	329	1	1.2305
NonTargeting_Human_0073	1	0.90844	0.90881	0.999997	1550	0	0.78569	0.091561	0.092259	0.793132	328	1	0.78569
NonTargeting_Human_0793	1	0.90885	0.90924	0.999997	1551	0	0.78355	0.091151	0.09183	0.793132	325	1	0.78355
NonTargeting_Human_0999	1	0.90893	0.90932	0.999997	1552	0	0.98298	0.091069	0.091751	0.793132	324	1	0.98298
NonTargeting_Human_0968	1	0.90975	0.91009	0.999997	1553	0	0.70755	0.090249	0.090914	0.793132	323	1	0.70755
NonTargeting_Human_0395	1	0.91024	0.9105	0.999997	1554	0	0.78002	0.089757	0.0904	0.793132	321	1	0.78002
TREM1	15	0.91026	0.96256	0.999997	1555	1	0.5799	0.00088838	0.0067222	0.519372	19	11	0.5799
HAPLN1	15	0.91104	0.96289	0.999997	1556	1	0.18216	0.053407	0.19859	0.834289	215	5	0.18216
NonTargeting_Human_0294	1	0.91114	0.91141	0.999997	1557	0	1.1792	0.088855	0.089462	0.793132	317	1	1.1792
NonTargeting_Human_0843	1	0.91139	0.91163	0.999997	1558	0	0.77078	0.088609	0.089259	0.793132	316	1	0.77078
NonTargeting_Human_0270	1	0.9132	0.91351	0.999997	1559	0	0.6759	0.086805	0.087484	0.793132	312	1	0.6759
NonTargeting_Human_0529	1	0.91377	0.91405	0.999997	1560	0	0.68093	0.086231	0.086993	0.793132	310	1	0.68093
NonTargeting_Human_0359	1	0.915	0.91528	0.999997	1561	0	1.0097	0.085001	0.085868	0.793132	307	1	1.0097
NDUFV1	15	0.91556	0.96441	0.999997	1562	1	0.58215	0.0001517	0.0013365	0.260176	9	10	0.58215
NonTargeting_Human_0424	1	0.91623	0.91646	0.999997	1563	0	1.2167	0.083771	0.084738	0.793132	304	1	1.2167
NonTargeting_Human_0900	1	0.91648	0.91669	0.999997	1564	0	0.83875	0.083525	0.084506	0.793132	303	1	0.83875
NonTargeting_Human_0540	1	0.91795	0.91823	0.999997	1565	0	0.66197	0.082049	0.083076	0.793132	300	1	0.66197
NonTargeting_Human_0983	1	0.91869	0.91899	0.999997	1566	0	1.0757	0.08131	0.08233	0.793132	297	1	1.0757
NonTargeting_Human_0870	1	0.91877	0.91907	0.999997	1567	0	1.0246	0.081228	0.08224	0.793132	296	1	1.0246
DROSHA	15	0.91889	0.96534	0.999997	1568	2	0.98842	8.455e-05	0.00074314	0.162748	8	11	0.98842
TMEM30A	15	0.91904	0.9654	0.999997	1569	1	0.41359	0.0045463	0.027711	0.714178	48	8	0.41359
NonTargeting_Human_0846	1	0.92	0.92026	0.999997	1570	0	0.71475	0.079998	0.080923	0.793132	294	1	0.71475
NonTargeting_Human_0263	1	0.92107	0.92133	0.999997	1571	0	0.77714	0.078932	0.079793	0.793132	292	1	0.77714
NonTargeting_Human_0158	1	0.92148	0.92172	0.999997	1572	0	0.83172	0.078522	0.079397	0.793132	291	1	0.83172
NonTargeting_Human_0386	1	0.92222	0.92244	0.999997	1573	0	1.2946	0.077784	0.078696	0.793132	289	1	1.2946
NonTargeting_Human_0254	1	0.9223	0.9225	0.999997	1574	0	1.5025	0.077702	0.078606	0.793132	288	1	1.5025
NonTargeting_Human_0716	1	0.92295	0.92319	0.999997	1575	0	0.95629	0.077046	0.0779	0.793132	286	1	0.95629
GYG2	15	0.92318	0.96661	0.999997	1576	1	0.53539	0.0011503	0.0082141	0.581041	21	9	0.53539
NonTargeting_Human_0092	1	0.9232	0.92348	0.999997	1577	0	1.1405	0.0768	0.077651	0.793132	285	1	1.1405
NonTargeting_Human_0072	1	0.92336	0.92363	0.999997	1578	0	1.0539	0.076636	0.077498	0.793132	284	1	1.0539
LONP1	15	0.92343	0.96665	0.999997	1579	2	0.51885	0.0090794	0.048722	0.757798	74	9	0.51885
UBE2Q1	15	0.92385	0.96682	0.999997	1580	1	0.25254	0.059515	0.21619	0.834289	239	8	0.25254
NonTargeting_Human_0973	1	0.92615	0.92637	0.999997	1581	0	1.447	0.073848	0.074475	0.779674	278	1	1.447
MED1	15	0.92624	0.96783	0.999997	1582	2	0.2525	0.013987	0.069948	0.779674	95	6	0.2525
MLLT1	15	0.92637	0.96789	0.999997	1583	1	0.25172	0.23829	0.52696	0.91306	668	4	0.25172
NonTargeting_Human_0355	1	0.92681	0.92696	0.999997	1584	0	0.91249	0.073192	0.073921	0.779674	277	1	0.91249
NonTargeting_Human_0643	1	0.92714	0.92724	0.999997	1585	0	1.4973	0.072864	0.073593	0.779674	275	1	1.4973
NonTargeting_Human_0853	1	0.92746	0.92754	0.999997	1586	0	0.84754	0.072536	0.073226	0.779674	273	1	0.84754
RALGAPA1	15	0.92828	0.96866	0.999997	1587	1	0.10395	0.0091862	0.049316	0.757798	75	4	0.10395
NonTargeting_Human_0887	1	0.92894	0.92892	0.999997	1588	0	0.83474	0.07106	0.071717	0.779674	267	1	0.83474
NonTargeting_Human_0369	1	0.9291	0.9291	0.999997	1589	0	0.90061	0.070896	0.071593	0.779674	266	1	0.90061
SMARCB1	15	0.92932	0.96906	0.999997	1590	2	0.26118	0.010389	0.05469	0.757798	78	7	0.26118
NonTargeting_Human_0649	1	0.92935	0.92944	0.999997	1591	0	1.1087	0.070649	0.071339	0.779674	265	1	1.1087
WNT3A	15	0.9296	0.96918	0.999997	1592	2	0.14683	0.21434	0.49527	0.905217	623	6	0.14683
NonTargeting_Human_0006	1	0.93042	0.9304	0.999997	1593	0	0.92955	0.069583	0.070078	0.779674	261	1	0.92955
PITPNM2	15	0.93167	0.96992	0.999997	1594	2	-0.050803	0.073898	0.24945	0.838356	279	3	-0.050803
FAM104A	15	0.93188	0.97002	0.999997	1595	2	0.067924	0.43723	0.72573	0.965555	1032	4	0.067924
NonTargeting_Human_0752	1	0.9323	0.93223	0.999997	1596	0	0.85638	0.067697	0.068213	0.779674	259	1	0.85638
NonTargeting_Human_0856	1	0.9332	0.9331	0.999997	1597	0	1.0845	0.066795	0.067535	0.779674	255	1	1.0845
NonTargeting_Human_0691	1	0.9346	0.93436	0.999997	1598	0	0.87528	0.065401	0.06597	0.775699	252	1	0.87528
PPIAL4A	15	0.93533	0.97128	0.999997	1599	2	0.21563	0.43902	0.72701	0.965555	1038	4	0.21563
NonTargeting_Human_0745	1	0.9355	0.93527	0.999997	1600	0	0.82366	0.064499	0.065094	0.775699	249	1	0.82366
HTRA2	15	0.93616	0.97159	0.999997	1601	1	0.22295	0.05617	0.2066	0.834289	225	7	0.22295
NonTargeting_Human_0904	1	0.93624	0.936	0.999997	1602	0	1.0018	0.063761	0.064303	0.775699	247	1	1.0018
NonTargeting_Human_0622	1	0.9364	0.93615	0.999997	1603	0	1.2837	0.063597	0.064145	0.775699	246	1	1.2837
POLRMT	15	0.93643	0.9717	0.999997	1604	2	0.12613	0.21234	0.49268	0.905076	612	5	0.12613
NonTargeting_Human_0714	1	0.93649	0.93622	0.999997	1605	0	1.8119	0.063515	0.064071	0.775699	245	1	1.8119
NonTargeting_Human_0113	1	0.93657	0.93628	0.999997	1606	0	0.9178	0.063433	0.063969	0.775699	244	1	0.9178
GART	15	0.93681	0.9719	0.999997	1607	1	0.11227	0.54845	0.80733	0.973807	1206	4	0.11227
SRGAP2	15	0.93728	0.97209	0.999997	1608	1	0.31155	0.086831	0.27772	0.854998	313	6	0.31155
NonTargeting_Human_0379	1	0.93755	0.93727	0.999997	1609	0	0.91931	0.062449	0.062952	0.775699	243	1	0.91931
C2CD4A	15	0.938	0.9724	0.999997	1610	2	0.095192	0.71061	0.89366	0.999997	1411	3	0.095192
ZBTB10	15	0.9393	0.97286	0.999997	1611	2	0.30547	0.13259	0.37166	0.869083	436	7	0.30547
hsa-mir-6508	8	0.93972	0.9396	0.999997	1612	0	0.25968	0.28969	0.50797	0.910624	772	3	0.25968
DAZ1	15	0.94136	0.97364	0.999997	1613	2	0.43749	0.014469	0.071955	0.779674	97	9	0.43749
NonTargeting_Human_0266	1	0.94173	0.94153	0.999997	1614	0	1.058	0.058266	0.058798	0.763073	234	1	1.058
TBXAS1	15	0.94228	0.974	0.999997	1615	1	0.15585	0.058028	0.21178	0.834289	233	5	0.15585
NonTargeting_Human_0650	1	0.94321	0.94287	0.999997	1616	0	0.63333	0.05679	0.057273	0.757798	228	1	0.63333
NonTargeting_Human_0492	1	0.94346	0.94307	0.999997	1617	0	0.82404	0.056544	0.057069	0.757798	227	1	0.82404
MYOZ3	15	0.94347	0.97446	0.999997	1618	1	0.45308	0.0008715	0.0065752	0.519372	18	10	0.45308
NonTargeting_Human_0861	1	0.94354	0.94317	0.999997	1619	0	0.90932	0.056462	0.056979	0.757798	226	1	0.90932
NonTargeting_Human_0854	1	0.9446	0.94428	0.999997	1620	0	1.313	0.055396	0.05586	0.757798	221	1	1.313
NonTargeting_Human_0242	1	0.94493	0.94457	0.999997	1621	0	0.76761	0.055068	0.055549	0.757798	220	1	0.76761
NonTargeting_Human_0539	1	0.94501	0.94465	0.999997	1622	0	1.4047	0.054986	0.055447	0.757798	219	1	1.4047
NonTargeting_Human_0667	1	0.94526	0.94493	0.999997	1623	0	1.1648	0.05474	0.05521	0.757798	218	1	1.1648
SSH3	15	0.94552	0.97527	0.999997	1624	2	0.10652	0.086602	0.27715	0.854998	311	6	0.10652
NonTargeting_Human_0229	1	0.94649	0.94617	0.999997	1625	0	0.62297	0.05351	0.053967	0.757798	216	1	0.62297
NonTargeting_Human_0740	1	0.9469	0.94655	0.999997	1626	0	1.641	0.0531	0.053554	0.757798	214	1	1.641
NonTargeting_Human_0746	1	0.94723	0.94691	0.999997	1627	0	1.0774	0.052772	0.053317	0.757798	211	1	1.0774
NonTargeting_Human_0025	1	0.94756	0.94721	0.999997	1628	0	1.3849	0.052444	0.053006	0.757798	208	1	1.3849
INSR	15	0.94762	0.97608	0.999997	1629	1	0.060873	0.96174	0.98361	0.999997	1689	2	0.060873
NonTargeting_Human_0871	1	0.94805	0.94769	0.999997	1630	0	0.78887	0.051952	0.052599	0.757798	204	1	0.78887
NonTargeting_Human_0756	1	0.94903	0.94872	0.999997	1631	0	0.68055	0.050968	0.051644	0.757798	202	1	0.68055
NonTargeting_Human_0698	1	0.94911	0.94879	0.999997	1632	0	0.87236	0.050886	0.051576	0.757798	201	1	0.87236
NonTargeting_Human_0851	1	0.94944	0.94916	0.999997	1633	0	1.7499	0.050558	0.051197	0.757798	199	1	1.7499
SQLE	15	0.94977	0.97714	0.999997	1634	1	1.0055	2.579e-05	0.00021192	0.061881	6	10	1.0055
NonTargeting_Human_0642	1	0.94985	0.94955	0.999997	1635	0	1.1439	0.050148	0.050881	0.757798	198	1	1.1439
ZNF22	15	0.95022	0.97738	0.999997	1636	2	0.36311	0.13306	0.37251	0.869083	439	7	0.36311
NonTargeting_Human_0118	1	0.95125	0.95094	0.999997	1637	0	0.98116	0.048753	0.049412	0.757798	195	1	0.98116
NonTargeting_Human_0148	1	0.95149	0.95118	0.999997	1638	0	0.78587	0.048507	0.049095	0.757798	194	1	0.78587
hsa-mir-1229	15	0.95171	0.97801	0.999997	1639	2	0.47846	0.0055226	0.032503	0.72083	56	9	0.47846
SNRPD1	14	0.95226	0.97596	0.999997	1640	1	0.25374	0.40275	0.69164	0.957587	987	5	0.25374
RDH14	15	0.95249	0.9784	0.999997	1641	1	0.51054	0.0034051	0.021223	0.681238	40	8	0.51054
BATF	15	0.95288	0.97861	0.999997	1642	2	0.24265	0.23133	0.51777	0.912349	658	6	0.24265
EIF3F	15	0.95306	0.97868	0.999997	1643	1	0.35451	0.0012537	0.008847	0.581041	22	8	0.35451
NonTargeting_Human_0243	1	0.9533	0.95293	0.999997	1644	0	0.97011	0.046703	0.047129	0.757517	189	1	0.97011
TBC1D22A	15	0.95376	0.97905	0.999997	1645	1	-0.1744	0.16866	0.43281	0.889402	511	3	-0.1744
CPSF2	15	0.95378	0.97905	0.999997	1646	2	0.013046	0.22619	0.51124	0.911047	643	4	0.013046
NonTargeting_Human_0251	1	0.95403	0.95369	0.999997	1647	0	0.84391	0.045965	0.046422	0.757517	187	1	0.84391
MARS2	15	0.95447	0.97935	0.999997	1648	2	0.34269	0.057185	0.20958	0.834289	229	7	0.34269
NonTargeting_Human_0220	1	0.95461	0.95427	0.999997	1649	0	0.98533	0.045391	0.04588	0.757517	183	1	0.98533
RBM14	15	0.95686	0.98058	0.999997	1650	2	0.32741	0.011285	0.058697	0.763073	83	9	0.32741
NonTargeting_Human_0292	1	0.95691	0.95672	0.999997	1651	0	1.2134	0.043095	0.04354	0.739861	176	1	1.2134
POLR2L	15	0.95716	0.98075	0.999997	1652	2	0.45607	0.0030465	0.019291	0.681238	37	8	0.45607
NDUFB10	15	0.95733	0.98085	0.999997	1653	1	0.33234	0.083479	0.27036	0.854265	302	7	0.33234
PGAP3	15	0.95751	0.98095	0.999997	1654	2	0.070928	0.11578	0.33741	0.869083	397	6	0.070928
AQP10	15	0.95769	0.98104	0.999997	1655	2	0.40428	0.013643	0.068592	0.779674	93	8	0.40428
NonTargeting_Human_0784	1	0.95928	0.95903	0.999997	1656	0	1.2983	0.040717	0.040935	0.724422	172	1	1.2983
NonTargeting_Human_0429	1	0.96027	0.96003	0.999997	1657	0	0.97766	0.039733	0.040019	0.722823	170	1	0.97766
NonTargeting_Human_0233	1	0.96084	0.96075	0.999997	1658	0	1.2402	0.039159	0.039499	0.722823	169	1	1.2402
hsa-mir-638	15	0.96093	0.98162	0.999997	1659	1	0.033559	0.57114	0.81909	0.977354	1234	4	0.033559
NonTargeting_Human_0561	1	0.96166	0.96165	0.999997	1660	0	1.0445	0.038339	0.038691	0.72114	166	1	1.0445
NonTargeting_Human_0354	1	0.96232	0.96228	0.999997	1661	0	1.1814	0.037682	0.037996	0.72114	164	1	1.1814
NonTargeting_Human_0218	1	0.96248	0.9625	0.999997	1662	0	1.0343	0.037518	0.037793	0.72114	163	1	1.0343
NonTargeting_Human_0288	1	0.96273	0.96272	0.999997	1663	0	0.95524	0.037272	0.037555	0.72114	162	1	0.95524
NonTargeting_Human_0300	1	0.96297	0.96291	0.999997	1664	0	1.3462	0.037026	0.037295	0.72114	161	1	1.3462
NonTargeting_Human_0234	1	0.96379	0.96377	0.999997	1665	0	0.94794	0.036206	0.036306	0.72114	159	1	0.94794
NonTargeting_Human_0282	1	0.96445	0.96441	0.999997	1666	0	1.1573	0.03555	0.035702	0.72114	156	1	1.1573
NELFB	15	0.96523	0.98243	0.999997	1667	1	0.21682	0.033119	0.13783	0.834289	149	7	0.21682
NonTargeting_Human_0289	1	0.96642	0.96634	0.999997	1668	0	1.4957	0.033582	0.033724	0.72114	152	1	1.4957
NonTargeting_Human_0050	1	0.96666	0.96664	0.999997	1669	0	1.536	0.033336	0.033492	0.72114	151	1	1.536
NonTargeting_Human_0528	1	0.96781	0.96781	0.999997	1670	0	1.2322	0.032188	0.032345	0.72083	147	1	1.2322
NonTargeting_Human_0202	1	0.96798	0.96796	0.999997	1671	0	1.1931	0.032024	0.032158	0.72083	145	1	1.1931
NonTargeting_Human_0946	1	0.96896	0.96885	0.999997	1672	0	1.7478	0.03104	0.031232	0.72083	144	1	1.7478
ANAPC16	15	0.96993	0.98349	0.999997	1673	1	0.31003	0.06155	0.22196	0.838356	242	6	0.31003
NonTargeting_Human_0245	1	0.97093	0.97083	0.999997	1674	0	1.1423	0.029072	0.029254	0.714178	141	1	1.1423
NonTargeting_Human_0068	1	0.97109	0.97098	0.999997	1675	0	0.76607	0.028908	0.029016	0.714178	138	1	0.76607
EXT1	15	0.97197	0.98398	0.999997	1676	1	0.27001	0.27748	0.57705	0.926051	753	5	0.27001
ZFP3	15	0.97236	0.98412	0.999997	1677	1	0.14001	0.088151	0.28046	0.854998	315	7	0.14001
TMEM30B	15	0.9724	0.98413	0.999997	1678	1	0.21442	0.26172	0.55759	0.926051	718	5	0.21442
SP140	15	0.97317	0.98435	0.999997	1679	1	0.25729	0.10671	0.31937	0.862141	370	7	0.25729
NonTargeting_Human_0458	1	0.97363	0.97337	0.999997	1680	0	1.5476	0.026365	0.026609	0.706346	134	1	1.5476
COX5B	15	0.97574	0.98501	0.999997	1681	1	0.43443	0.39569	0.69102	0.957587	979	5	0.43443
TGIF1	15	0.9763	0.98516	0.999997	1682	1	0.37575	0.0008011	0.0061401	0.519372	17	11	0.37575
MDH1	15	0.97634	0.98517	0.999997	1683	1	0.56937	0.00032938	0.0025459	0.3717	12	11	0.56937
METTL17	15	0.97682	0.98533	0.999997	1684	1	0.48369	0.0060853	0.035137	0.72114	59	9	0.48369
NonTargeting_Human_0804	1	0.97691	0.9768	0.999997	1685	0	1.4968	0.023085	0.023359	0.682096	128	1	1.4968
NonTargeting_Human_0989	1	0.97732	0.97726	0.999997	1686	0	2.5147	0.022675	0.022941	0.681238	126	1	2.5147
NonTargeting_Human_0957	1	0.97741	0.9773	0.999997	1687	0	2.5479	0.022593	0.02284	0.681238	125	1	2.5479
NonTargeting_Human_0639	1	0.97765	0.97749	0.999997	1688	0	1.28	0.022347	0.022636	0.681238	124	1	1.28
NonTargeting_Human_0786	1	0.97782	0.97767	0.999997	1689	0	2.3013	0.022183	0.022455	0.681238	122	1	2.3013
NonTargeting_Human_0952	1	0.97806	0.97791	0.999997	1690	0	0.83876	0.021937	0.022201	0.681238	121	1	0.83876
NonTargeting_Human_0533	1	0.9788	0.97863	0.999997	1691	0	1.6154	0.021199	0.021353	0.681238	118	1	1.6154
NonTargeting_Human_0715	1	0.97938	0.97921	0.999997	1692	0	1.8694	0.020625	0.020828	0.681238	116	1	1.8694
STOML3	15	0.97972	0.98617	0.999997	1693	1	0.39218	0.019611	0.093576	0.793132	114	8	0.39218
MID1	15	0.97975	0.98619	0.999997	1694	1	0.45522	0.016438	0.080398	0.793132	103	8	0.45522
NonTargeting_Human_0276	1	0.98126	0.9811	0.999997	1695	0	1.5267	0.018739	0.018872	0.681238	111	1	1.5267
LSS	15	0.98142	0.98676	0.999997	1696	1	0.90326	2.8512e-06	1.9779e-05	0.008663	4	12	0.90326
RPUSD4	15	0.98201	0.98698	0.999997	1697	1	0.43675	0.011022	0.057527	0.757798	81	9	0.43675
CCL14	15	0.98204	0.98699	0.999997	1698	1	0.15679	0.12838	0.36301	0.869083	424	5	0.15679
PEX6	15	0.98283	0.98724	0.999997	1699	1	0.2855	0.044825	0.1737	0.834289	181	7	0.2855
NonTargeting_Human_0281	1	0.98372	0.9839	0.999997	1700	0	1.3662	0.016278	0.016346	0.681238	101	1	1.3662
hsa-mir-1908	15	0.98445	0.98795	0.999997	1701	1	0.10264	0.018422	0.088614	0.793132	109	6	0.10264
hsa-mir-1302-6	7	0.98586	0.98602	0.999997	1702	0	0.42818	0.067462	0.1823	0.834289	257	4	0.42818
NonTargeting_Human_0455	1	0.98725	0.98743	0.999997	1703	0	2.4041	0.012752	0.012701	0.635785	89	1	2.4041
TBC1D25	15	0.98795	0.98951	0.999997	1704	1	0.17432	0.13281	0.37209	0.869083	437	6	0.17432
USP9X	15	0.98834	0.98968	0.999997	1705	1	0.55659	0.03316	0.13796	0.834289	150	8	0.55659
MRPL9	15	0.98857	0.98979	0.999997	1706	1	0.25192	0.0065279	0.037307	0.72114	60	7	0.25192
CORO1A	15	0.9888	0.98989	0.999997	1707	1	0.22809	0.094011	0.29312	0.856347	334	7	0.22809
NonTargeting_Human_0575	1	0.98881	0.98904	0.999997	1708	0	1.4454	0.011194	0.011102	0.607828	82	1	1.4454
WWP1	15	0.98889	0.98995	0.999997	1709	1	0.43192	0.096303	0.29783	0.856347	342	7	0.43192
NonTargeting_Human_0299	1	0.98938	0.98954	0.999997	1710	0	2.9758	0.01062	0.010559	0.607828	80	1	2.9758
MGAT1	15	0.98969	0.99041	0.999997	1711	1	0.55848	0.00021858	0.0017434	0.305446	10	10	0.55848
NonTargeting_Human_0670	1	0.9902	0.99037	0.999997	1712	0	1.6816	0.0097999	0.0096834	0.602424	77	1	1.6816
TRIM8	15	0.99093	0.99124	0.999997	1713	1	0.17142	0.053622	0.19916	0.834289	217	6	0.17142
NonTargeting_Human_0902	1	0.99118	0.99136	0.999997	1714	0	1.6338	0.0088158	0.0085814	0.581041	73	1	1.6338
FBXL8	15	0.9913	0.99151	0.999997	1715	1	0.25799	0.25027	0.54261	0.921006	697	6	0.25799
MRPS16	15	0.99132	0.99153	0.999997	1716	1	0.26167	0.048401	0.18391	0.834289	193	7	0.26167
SERPINA1	15	0.99158	0.99175	0.999997	1717	1	0.26527	0.007094	0.039844	0.722823	65	6	0.26527
VPS13C	15	0.99218	0.99225	0.999997	1718	1	0.094873	0.84996	0.9471	0.999997	1577	2	0.094873
ITGA1	15	0.99235	0.9924	0.999997	1719	1	0.38013	0.0041801	0.025643	0.706346	43	7	0.38013
PIGQ	15	0.99253	0.99252	0.999997	1720	1	0.49152	0.0093957	0.050254	0.757798	76	8	0.49152
NonTargeting_Human_0807	1	0.99307	0.99328	0.999997	1721	0	2.4148	0.0069296	0.0068182	0.519372	64	1	2.4148
NonTargeting_Human_0852	1	0.99315	0.99335	0.999997	1722	0	4.2021	0.0068476	0.0067165	0.519372	63	1	4.2021
CHRND	15	0.9932	0.99315	0.999997	1723	1	0.46304	0.0084794	0.046196	0.757517	71	9	0.46304
DCAF4	15	0.99392	0.99379	0.999997	1724	1	0.069269	0.061509	0.22185	0.838356	241	6	0.069269
OR52B2	15	0.99438	0.99426	0.999997	1725	0	0.16826	0.18838	0.46013	0.901978	561	5	0.16826
ISG20	15	0.99439	0.99427	0.999997	1726	0	0.23918	0.039138	0.15647	0.834289	168	6	0.23918
TFAM	15	0.99445	0.99434	0.999997	1727	0	0.32642	0.027099	0.11844	0.816	135	7	0.32642
NonTargeting_Human_0836	1	0.99512	0.99535	0.999997	1728	0	4.5181	0.0048794	0.0048233	0.519372	52	1	4.5181
GTPBP5	15	0.99514	0.99504	0.999997	1729	0	0.28279	0.012796	0.064992	0.775699	90	7	0.28279
PDCD10	15	0.99519	0.9951	0.999997	1730	0	0.40727	0.047717	0.18189	0.834289	191	8	0.40727
MTHFD1	15	0.99525	0.99517	0.999997	1731	0	0.31399	0.28988	0.59219	0.935545	775	6	0.31399
hsa-mir-6831	12	0.99559	0.99539	0.999997	1732	0	0.070335	0.6991	0.864	0.992115	1402	3	0.070335
TMEM67	15	0.99588	0.99575	0.999997	1733	0	0.40687	0.045478	0.17551	0.834289	185	8	0.40687
CHP1	15	0.99618	0.99607	0.999997	1734	0	0.51693	0.0043259	0.026513	0.706346	47	9	0.51693
GREB1L	15	0.99645	0.99632	0.999997	1735	0	0.54121	0.0021629	0.014024	0.681238	28	8	0.54121
FAM134C	15	0.99685	0.99672	0.999997	1736	0	0.10687	0.22325	0.50743	0.910624	637	5	0.10687
UBE2O	15	0.99717	0.99708	0.999997	1737	0	0.41306	0.007956	0.043879	0.739861	69	9	0.41306
STRAP	15	0.99733	0.9972	0.999997	1738	0	1.3861	1.8115e-09	2.8256e-06	0.00165	2	12	1.3861
CPM	15	0.99773	0.99754	0.999997	1739	0	0.37977	0.084879	0.27354	0.854265	306	6	0.37977
USP22	15	0.99777	0.99755	0.999997	1740	0	0.22592	0.044656	0.17302	0.834289	180	6	0.22592
JAK1	15	0.99808	0.99785	0.999997	1741	0	0.42026	0.0052557	0.03113	0.72083	53	8	0.42026
UPF1	15	0.99814	0.99791	0.999997	1742	0	0.70117	1.2183e-05	0.0001102	0.038614	5	10	0.70117
BMP15	15	0.99815	0.99792	0.999997	1743	0	0.058866	0.42854	0.71835	0.965555	1019	3	0.058866
PRPF38B	15	0.99841	0.99822	0.999997	1744	0	0.88395	0.00055055	0.0043882	0.519372	13	9	0.88395
COPS8	15	0.99842	0.99822	0.999997	1745	0	0.59088	0.0018851	0.012611	0.635785	27	10	0.59088
CBWD1	15	0.99859	0.99843	0.999997	1746	0	0.22807	0.069595	0.24001	0.838356	262	4	0.22807
CAPN15	15	0.99861	0.99844	0.999997	1747	0	0.25735	0.05798	0.21164	0.834289	232	8	0.25735
TMEM18	15	0.99871	0.99854	0.999997	1748	0	0.22207	0.27807	0.57771	0.926051	755	5	0.22207
TAOK1	15	0.99988	0.99991	0.999997	1749	0	0.52964	0.0023873	0.015442	0.681238	30	8	0.52964
MRPS31	15	0.99998	0.99999	0.999997	1750	0	0.63254	0.0030081	0.019025	0.681238	35	10	0.63254
KAT7	15	0.99999	0.99999	0.999997	1751	0	1.0321	1.7961e-07	2.8256e-06	0.00165	3	13	1.0321
MYLIP	15	1	1	0.999997	1752	0	1.3805	2.1312e-10	2.8256e-06	0.00165	1	14	1.3805

## Sheet: HepG2_LP-rich_gRNA
sgrna	Gene	control_count	treatment_count	control_mean	treat_mean	LFC	control_var	adj_var	score	p.low	p.high	p.twosided	FDR	high_in_treatment
SCAP_5	SCAP	2344.5/1586.8/1805.7	167.55/158.38/75.357	1805.7	158.38	-3.5029	169130	249240	3.4016	0.00033497	0.99967	0.00066993	0.014627	FALSE
CHD7_8	CHD7	394.16/662.29/154.95	0/0/229.53	394.16	0	-8.6263	64560	54405	3.3718	0.00037343	0.99963	0.00074686	0.016278	FALSE
UVRAG_13	UVRAG	461.18/112.85/315.19	0/255.7/0.86617	315.19	0.86617	-7.4046	31127	43505	3.2546	0.0005677	0.99943	0.0011354	0.024311	FALSE
CCT8_9	CCT8	319.11/311.2/0	0/0/115.2	311.2	0	-8.2863	48454	42955	3.2483	0.00058041	0.99942	0.0011608	0.024769	FALSE
ITGA1_14	ITGA1	314.74/526.64/114.55	0.94129/0/111.74	314.74	0.94129	-7.3456	42489	43444	3.2302	0.00061863	0.99938	0.0012373	0.026308	FALSE
MBTPS2_11	MBTPS2	2223.6/905.1/1759.4	213.67/384.88/173.23	1759.4	213.67	-3.0357	472640	242840	3.2045	0.00067638	0.99932	0.0013528	0.028516	FALSE
DYRK1A_14	DYRK1A	1505.2/1837.6/780.03	94.129/676.86/133.39	1505.2	133.39	-3.4864	318180	207770	3.1456	0.00082868	0.99917	0.0016574	0.034227	FALSE
MBTPS2_3	MBTPS2	311.83/172.13/218.51	0.94129/0/39.844	218.51	0.94129	-6.8211	5429.6	30161	3.0625	0.0010975	0.9989	0.0021949	0.044134	FALSE
ATP6V0D1_3	ATP6V0D1	187.24/17.099/233.08	15.061/0/0	187.24	0	-7.5564	15525	25845	3.0242	0.0012464	0.99875	0.0024928	0.049713	FALSE
CENPA_5	CENPA	209.83/189.23/96.013	0.94129/0/151.58	189.23	0.94129	-6.6146	4556.6	26119	3.0031	0.0013362	0.99866	0.0026724	0.052563	FALSE
ATP6AP2_2	ATP6AP2	175.59/284.98/13.243	0/0/40.71	175.59	0	-7.4642	19161	24236	2.999	0.0013544	0.99865	0.0027088	0.053152	FALSE
CCT8_7	CCT8	107.1/270.16/174.15	0/0/42.442	174.15	0	-7.4524	6857	24038	2.9958	0.0013686	0.99863	0.0027372	0.053623	FALSE
YME1L1_5	YME1L1	169.03/304.36/113.23	2.8239/0/0	169.03	0	-7.4096	10714	23331	2.9843	0.001421	0.99858	0.002842	0.055233	FALSE
TCP10_13	TCP10	126.77/235.96/168.19	0/0/23.387	168.19	0	-7.4025	3154.4	23215	2.9824	0.0014299	0.99857	0.0028597	0.055489	FALSE
NonTargeting_Human_0836	NonTargeting_Human_0836	225.13/0/162.89	0/0/45.907	162.89	0	-7.3566	15204	22484	2.9703	0.0014877	0.99851	0.0029753	0.05755	FALSE
TBC1D25_7	TBC1D25	148.63/632.66/15.892	0/0/61.498	148.63	0	-7.2252	125950	20515	2.9362	0.0016613	0.99834	0.0033226	0.063562	FALSE
PAM16_14	PAM16	336.6/34.198/251.62	1.8826/0/81.42	251.62	1.8826	-6.4535	27247	34731	2.9131	0.0017892	0.99821	0.0035783	0.067816	FALSE
PIGS_12	PIGS	138.43/294.1/0	0/0/87.483	138.43	0	-7.1234	21698	19107	2.9105	0.0018045	0.9982	0.0036089	0.068205	FALSE
ATP6V1H_6	ATP6V1H	0/302.08/138.39	154.37/0/0	138.39	0	-7.123	22973	19102	2.9104	0.001805	0.99819	0.00361	0.068205	FALSE
MBTPS1_14	MBTPS1	1632/762.61/2958.5	194.85/733.49/274.58	1632	274.58	-2.567	1257800	225260	2.9067	0.0018262	0.99817	0.0036524	0.068793	FALSE
AP2M1_14	AP2M1	249.17/776.29/501.92	0/7.0783/58.899	501.92	7.0783	-5.9601	69580	69280	2.9046	0.0018387	0.99816	0.0036774	0.069156	FALSE
WDR7_15	WDR7	0/620.12/135.74	0/224.74/0	135.74	0	-7.0953	126520	18737	2.9035	0.0018452	0.99815	0.0036904	0.069295	FALSE
AMTN_4	AMTN	26.957/425.19/133.76	0/0/63.23	133.76	0	-7.0742	48170	18462	2.8982	0.0018763	0.99812	0.0037526	0.070354	FALSE
VPS29_5	VPS29	126.04/0/193.35	0/0/201.82	126.04	0	-6.9892	10209	17398	2.8774	0.0020048	0.998	0.0040096	0.074942	FALSE
SRP19_11	SRP19	0/216.59/121.18	53.653/0/0	121.18	0	-6.9328	11893	16726	2.8638	0.002093	0.99791	0.004186	0.078001	FALSE
CTR9_5	CTR9	277.59/225.7/45.689	1.8826/0/161.11	225.7	1.8826	-6.2973	17549	31154	2.8623	0.0021027	0.9979	0.0042055	0.078124	FALSE
SCAP_1	SCAP	1640/259.9/1599.8	194.85/419.39/288.43	1599.8	288.43	-2.4675	898450	220820	2.8338	0.0022996	0.9977	0.0045992	0.084922	FALSE
hsa-mir-550a-1_5	hsa-mir-550a-1	97.628/80.934/154.28	0.94129/0/0	97.628	0	-6.6239	1744.2	13476	2.7917	0.0026213	0.99738	0.0052425	0.096654	FALSE
CCT6A_5	CCT6A	169.03/0/93.365	65.89/0/0	93.365	0	-6.5602	7221	12887	2.7774	0.0027401	0.99726	0.0054803	0.099831	FALSE
SRP14_14	SRP14	91.8/92.334/163.55	32.004/0/0	92.334	0	-6.5443	2536.3	12745	2.7738	0.0027702	0.99723	0.0055405	0.10078	FALSE
RPS8_4	RPS8	88.886/0/178.12	227.79/0/0	88.886	0	-6.49	7931.8	12269	2.7617	0.002875	0.99713	0.00575	0.10443	FALSE
FAM126A_11	FAM126A	44.443/240.52/88.73	73.421/0/0	88.73	0	-6.4875	12501	12247	2.7612	0.0028799	0.99712	0.0057598	0.10445	FALSE
PDE1A_3	PDE1A	0/100.31/87.405	0/0/49.372	87.405	0	-6.4661	3903.1	12065	2.7564	0.002922	0.99708	0.005844	0.10551	FALSE
MGEA5_2	MGEA5	85.243/0/90.716	32.004/0/0	85.243	0	-6.4303	3648.1	11766	2.7485	0.0029931	0.99701	0.0059862	0.10776	FALSE
ERP44_2	ERP44	82.328/183.53/0	0/0/8.6617	82.328	0	-6.3807	8509.6	11364	2.7377	0.0030937	0.99691	0.0061874	0.11073	FALSE
KIAA1432_15	KIAA1432	89.614/229.12/89.392	0.94129/0/37.245	89.614	0.94129	-5.5446	9731.6	12369	2.737	0.0031005	0.9969	0.006201	0.11081	FALSE
CSNK1A1_14	CSNK1A1	79.414/287.26/81.446	0/0/0	81.446	0	-6.3654	21182	11242	2.7343	0.0031253	0.99687	0.0062506	0.11137	FALSE
hsa-mir-6886_6	hsa-mir-6886	1137.3/429.75/1085.9	82.833/105.29/333.47	1085.9	105.29	-3.3542	216610	149890	2.7321	0.0031468	0.99685	0.0062935	0.11181	FALSE
RBBP5_8	RBBP5	80.143/255.34/50.324	0/0/74.491	80.143	0	-6.3424	15792	11062	2.7293	0.003173	0.99683	0.006346	0.11258	FALSE
SNRPD1_12	SNRPD1	79.414/80.934/5.9594	0/0/146.38	79.414	0	-6.3294	2698.9	10962	2.7265	0.0032002	0.9968	0.0064005	0.11321	FALSE
TMOD2_9	TMOD2	79.414/0/80.784	95.07/0/0	79.414	0	-6.3294	3154.2	10962	2.7265	0.0032002	0.9968	0.0064005	0.11321	FALSE
INTS8_10	INTS8	76.5/639.5/12.581	13.178/0/0	76.5	0	-6.2761	160530	10559	2.7151	0.0033133	0.99669	0.0066265	0.11654	FALSE
EIF3C_15	EIF3C	0/248.5/74.824	0/0/0	74.824	0	-6.2446	17881	10328	2.7083	0.0033814	0.99662	0.0067629	0.11876	FALSE
SCAP_7	SCAP	1368.3/1112.6/1193.2	150.61/135.37/237.33	1193.2	150.61	-2.9777	18572	164700	2.7003	0.0034642	0.99654	0.0069284	0.12132	FALSE
SRP19_6	SRP19	277.59/256.48/80.784	3.7652/0/16.457	256.48	3.7652	-5.7558	15658	35402	2.697	0.0034982	0.9965	0.0069964	0.12216	FALSE
INSR_1	INSR	0/174.41/70.189	0/93.787/0.86617	70.189	0.86617	-5.2535	7894	9688.2	2.689	0.0035835	0.99642	0.0071671	0.12478	FALSE
DHDDS_2	DHDDS	152.27/69.535/33.77	0/0/73.624	69.535	0	-6.1403	4062.2	9598	2.6862	0.0036138	0.99639	0.0072276	0.12563	FALSE
SSX2_5	SSX2	0/91.194/68.865	0/0/66.695	68.865	0	-6.1265	2620.5	9505.4	2.6833	0.0036453	0.99635	0.0072905	0.12604	FALSE
TNFAIP3_9	TNFAIP3	126.77/0/67.54	0/0/0	67.54	0	-6.0989	4035	9322.6	2.6775	0.0037089	0.99629	0.0074178	0.12805	FALSE
MFAP1_13	MFAP1	201.81/0/187.39	81.892/0/2.5985	187.39	2.5985	-5.7102	17662	25866	2.673	0.0037587	0.99624	0.0075174	0.12959	FALSE
SCAP_9	SCAP	1452/1307.5/1266.1	212.73/669.78/149.85	1307.5	212.73	-2.614	11306	180470	2.6568	0.0039445	0.99606	0.007889	0.13542	FALSE
MED12_14	MED12	115.84/0/61.581	0/140.68/0	61.581	0	-5.9677	3368.3	8500	2.6502	0.0040219	0.99598	0.0080438	0.13731	FALSE
SETD1A_4	SETD1A	72.857/51.296/61.581	0/0/15.591	61.581	0	-5.9677	116.46	8500	2.6502	0.0040219	0.99598	0.0080438	0.13731	FALSE
MRPL28_4	MRPL28	65.571/0/60.919	0/0/0	60.919	0	-5.9523	1866.4	8408.6	2.6471	0.0040596	0.99594	0.0081193	0.13821	FALSE
HNRNPM_9	HNRNPM	199.63/0/57.608	0/0/36.379	57.608	0	-5.873	11744	7951.6	2.6308	0.0042586	0.99574	0.0085173	0.14378	FALSE
MED27_5	MED27	56.828/42.177/56.284	0/0/40.71	56.284	0	-5.8401	99.646	7768.8	2.6241	0.0043434	0.99566	0.0086867	0.14604	FALSE
ATP6AP2_11	ATP6AP2	188.7/0/54.959	0/0/7.7955	54.959	0	-5.8063	10453	7586	2.6173	0.0044313	0.99557	0.0088626	0.14858	FALSE
TMEM199_6	TMEM199	54.643/0/299.96	0/0/51.104	54.643	0	-5.7981	31583	7542.3	2.6157	0.0044528	0.99555	0.0089057	0.1491	FALSE
ACO2_14	ACO2	0/740.95/54.297	0/245.09/0	54.297	0	-5.7891	237220	7494.6	2.6138	0.0044765	0.99552	0.0089531	0.14969	FALSE
LDLR_12	LDLR	986.48/0/498.61	9.4129/189.34/16.457	498.61	16.457	-4.8389	243320	68823	2.6126	0.0044925	0.99551	0.008985	0.15002	FALSE
MRPL28_1	MRPL28	51.728/0/78.797	32.004/0/0	51.728	0	-5.7205	1704.3	7140.1	2.6	0.0046606	0.99534	0.0093212	0.15436	FALSE
HYPK_15	HYPK	51.728/551.72/46.351	0/0/88.349	51.728	0	-5.7205	125010	7140.1	2.6	0.0046606	0.99534	0.0093212	0.15436	FALSE
INTS6_15	INTS6	0/51.296/78.135	77.186/0/0	51.296	0	-5.7086	1675.8	7080.5	2.5977	0.0046929	0.99531	0.0093859	0.15501	FALSE
SMC1A_12	SMC1A	0/290.68/50.986	0/0/12.993	50.986	0	-5.7001	30026	7037.7	2.596	0.0047164	0.99528	0.0094329	0.15558	FALSE
IL17RA_13	IL17RA	49.543/215.45/0	83.775/0/0	49.543	0	-5.6594	14989	6838.4	2.5878	0.0048289	0.99517	0.0096577	0.15886	FALSE
ARPC3_7	ARPC3	127.5/0/48.338	0/0/29.45	48.338	0	-5.6246	4301.6	6672.1	2.5809	0.0049267	0.99507	0.0098534	0.16142	FALSE
TMEM258_1	TMEM258	62.657/47.877/47.676	7.5303/0/0	47.877	0	-5.6111	109.25	6608.4	2.5782	0.0049651	0.99503	0.0099303	0.16247	FALSE
MBTPS2_14	MBTPS2	1151.1/348.82/854.19	72.479/0/159.38	854.19	72.479	-3.5408	171790	117900	2.5752	0.0050087	0.99499	0.010017	0.16367	FALSE
METAP1_15	METAP1	23.314/55.856/47.013	108.25/0/0	47.013	0	-5.5854	319.92	6489.3	2.5732	0.0050387	0.99496	0.010077	0.16443	FALSE
NDUFB10_4	NDUFB10	46.628/0/96.013	33.886/0/0	46.628	0	-5.5738	2306.5	6436.1	2.5709	0.0050722	0.99493	0.010144	0.16508	FALSE
WDR82_1	WDR82	0/392.13/48.338	0.94129/0/20.788	48.338	0.94129	-4.6676	60266	6672.1	2.552	0.0053554	0.99464	0.010711	0.17221	FALSE
MBTPS2_1	MBTPS2	1390.8/1468.2/652.89	353.92/294.63/61.498	1390.8	294.63	-2.2351	275280	191980	2.5472	0.0054299	0.99457	0.01086	0.17417	FALSE
CSNK1A1_15	CSNK1A1	0/98.033/42.378	0/0/25.119	42.378	0	-5.4389	2446.7	5849.5	2.5444	0.0054731	0.99453	0.010946	0.17533	FALSE
DET1_5	DET1	49.543/0/41.716	0/0/119.53	41.716	0	-5.4167	900.75	5758.1	2.5401	0.0055412	0.99446	0.011082	0.17728	FALSE
HYPK_1	HYPK	0/258.76/40.392	0/140.68/0	40.392	0	-5.3713	24659	5575.3	2.5313	0.0056826	0.99432	0.011365	0.18109	FALSE
DHDDS_4	DHDDS	142.8/395.55/104.62	2.8239/0/64.096	142.8	2.8239	-5.2329	32671	19711	2.5292	0.0057159	0.99428	0.011432	0.18191	FALSE
MBTPS1_3	MBTPS1	1331.1/87.774/1695.1	188.26/360.11/278.91	1331.1	278.91	-2.2507	839190	183730	2.506	0.0061053	0.99389	0.012211	0.1923	FALSE
VPS35_13	VPS35	0/280.42/36.419	0/0/45.907	36.419	0	-5.2257	30432	5026.9	2.5032	0.0061539	0.99385	0.012308	0.19358	FALSE
ARPC3_4	ARPC3	0/262.18/40.392	0.94129/0/58.899	40.392	0.94129	-4.4143	25411	5575.3	2.5019	0.0061771	0.99382	0.012354	0.19406	FALSE
TFAM_6	TFAM	95.443/0/36.419	22.591/0.88479/0	36.419	0.88479	-4.3113	2405.1	5026.9	2.4956	0.0062866	0.99371	0.012573	0.19624	FALSE
GSK3B_7	GSK3B	110.01/0/33.77	44.241/0/0	33.77	0	-5.1198	3476.8	4661.3	2.483	0.0065149	0.99349	0.01303	0.20284	FALSE
DDX52_12	DDX52	67.028/30.778/0	0/0/28.584	30.778	0	-4.99	1130.7	4248.3	2.4583	0.0069791	0.99302	0.013958	0.21592	FALSE
AGAP4_1	AGAP4	0/289.54/30.459	47.064/0/0	30.459	0	-4.9754	34025	4204.3	2.4556	0.0070326	0.99297	0.014065	0.21702	FALSE
NonTargeting_Human_0714	NonTargeting_Human_0714	29.143/0/78.135	170.37/0/0	29.143	0	-4.9137	1624.8	4022.6	2.444	0.0072633	0.99274	0.014527	0.22302	FALSE
NID1_6	NID1	244.8/58.136/235.73	159.08/0/6.9293	235.73	6.9293	-4.8999	15811	32538	2.4374	0.007397	0.9926	0.014794	0.22684	FALSE
LIMS3_12	LIMS3	57.557/0/27.811	58.36/0/0	27.811	0	-4.8485	829.14	3838.7	2.4317	0.0075136	0.99249	0.015027	0.22928	FALSE
WDR7_4	WDR7	350.44/232.54/301.95	10.354/312.33/10.394	301.95	10.394	-4.7327	3584.2	41678	2.428	0.0075911	0.99241	0.015182	0.23133	FALSE
CWC22_5	CWC22	77.957/0/29.797	0.94129/0/82.286	29.797	0.94129	-3.9877	1603.6	4112.9	2.4196	0.0077686	0.99223	0.015537	0.23615	FALSE
GAPDH_1	GAPDH	338.78/556.28/241.03	13.178/0/403.63	338.78	13.178	-4.5829	28431	46763	2.4118	0.0079375	0.99206	0.015875	0.24069	FALSE
ALG2_6	ALG2	416.01/0/295.32	86.599/10.617/0	295.32	10.617	-4.6728	50891	40764	2.4063	0.0080565	0.99194	0.016113	0.24369	FALSE
TFRC_1	TFRC	0/43.317/25.162	0/80.516/0	25.162	0	-4.7094	481.37	3473.1	2.4057	0.0080705	0.99193	0.016141	0.24381	FALSE
ACO2_3	ACO2	318.39/336.28/72.838	0/12.387/142.05	318.39	12.387	-4.5764	30307	43947	2.3948	0.0083143	0.99169	0.016629	0.25025	FALSE
LDLR_14	LDLR	1671.3/316.9/785.98	33.886/443.28/86.617	785.98	86.617	-3.1671	501950	108490	2.3899	0.0084259	0.99157	0.016852	0.2533	FALSE
PPP1R8_1	PPP1R8	128.96/0/135.08	3.7652/0/27.717	128.96	3.7652	-4.7694	8333.7	17800	2.383	0.0085858	0.99141	0.017172	0.25747	FALSE
PDCD10_2	PDCD10	0/312.34/62.905	1.8826/193.77/0	62.905	1.8826	-4.4705	33087	8682.8	2.3819	0.0086126	0.99139	0.017225	0.25796	FALSE
PFDN2_13	PFDN2	461.91/519.8/86.743	0/148.64/25.985	461.91	25.985	-4.1005	72052	63758	2.3758	0.0087556	0.99124	0.017511	0.26192	FALSE
SYS1_12	SYS1	439.33/628.1/278.11	23.532/10.617/107.4	439.33	23.532	-4.1658	30813	60640	2.3749	0.0087775	0.99122	0.017555	0.26225	FALSE
GTF2H2_2	GTF2H2	0/279.28/21.851	0/0/0	21.851	0	-4.5142	33374	3016.1	2.3694	0.0089074	0.99109	0.017815	0.26581	FALSE
SCAP_15	SCAP	1479.7/831/1238.2	362.4/76.976/284.1	1238.2	284.1	-2.1199	112080	170910	2.3598	0.0091426	0.99086	0.018285	0.27157	FALSE
CCZ1_10	CCZ1	209.83/0/19.865	0/0/0	19.865	0	-4.383	18240	2741.9	2.3452	0.0095091	0.99049	0.019018	0.2817	FALSE
MBTPS1_2	MBTPS1	1371.2/623.54/1060.8	216.5/200.85/140.32	1060.8	200.85	-2.3952	143760	146420	2.3435	0.0095524	0.99045	0.019105	0.28263	FALSE
KAT8_11	KAT8	112.93/0/19.203	0/0/0	19.203	0	-4.3365	4576.6	2650.5	2.3366	0.0097305	0.99027	0.019461	0.28686	FALSE
MKL1_13	MKL1	61.2/139.07/80.121	0.94129/2.6544/71.026	80.121	2.6544	-4.4724	1916.5	11059	2.3344	0.0097885	0.99021	0.019577	0.28822	FALSE
DHDDS_15	DHDDS	18.943/0/94.689	0/32.737/0	18.943	0	-4.3178	3048.2	2614.7	2.3331	0.0098206	0.99018	0.019641	0.28882	FALSE
DYRK1A_8	DYRK1A	2034.2/1418.1/1047.5	399.11/927.26/380.25	1418.1	399.11	-1.8265	258440	195740	2.3276	0.0099674	0.99003	0.019935	0.29186	FALSE
TAF2_12	TAF2	332.23/58.136/368.82	16.002/11.502/102.21	332.23	16.002	-4.2927	38233	45857	2.3231	0.010087	0.98991	0.020175	0.29489	FALSE
hsa-mir-6886_13	hsa-mir-6886	260.83/84.354/135.08	4.7064/0/30.316	135.08	4.7064	-4.5757	9192.8	18645	2.3181	0.010222	0.98978	0.020444	0.29775	FALSE
LDLR_2	LDLR	921.64/411.51/1025.7	116.72/807.81/148.98	921.64	148.98	-2.621	135530	127210	2.3148	0.010311	0.98969	0.020622	0.29928	FALSE
MBTPS2_8	MBTPS2	955.88/346.54/920.4	148.72/205.27/129.06	920.4	148.72	-2.6215	165290	127040	2.3139	0.010336	0.98966	0.020673	0.29966	FALSE
ARIH1_12	ARIH1	0/17.099/42.378	86.599/0/0	17.099	0	-4.1778	465.71	2360.2	2.3073	0.010519	0.98948	0.021037	0.30422	FALSE
MESDC2_3	MESDC2	1515.4/1234.5/566.81	353.92/138.91/304.89	1234.5	304.89	-2.014	262380	170400	2.2979	0.010783	0.98922	0.021565	0.30966	FALSE
PIK3R4_5	PIK3R4	77.228/0/84.757	2.8239/15.926/0	77.228	2.8239	-4.3546	3010.4	10660	2.2979	0.010783	0.98922	0.021565	0.30966	FALSE
DHDDS_5	DHDDS	794.87/0/294.66	0/14.157/141.19	294.66	14.157	-4.2859	168520	40672	2.2932	0.01092	0.98908	0.021839	0.31248	FALSE
LDLR_11	LDLR	689.96/1.1399/593.3	55.536/0/121.26	593.3	55.536	-3.3939	180000	81893	2.2818	0.01125	0.98875	0.0225	0.32081	FALSE
VPS33A_15	VPS33A	0/177.83/45.027	1.8826/0/45.907	45.027	1.8826	-3.997	9831.7	6215.1	2.2775	0.011378	0.98862	0.022757	0.32409	FALSE
CDC73_10	CDC73	0/88.914/14.568	0/0/65.829	14.568	0	-3.9605	2869.8	2010.8	2.2672	0.011688	0.98831	0.023376	0.33096	FALSE
USP9X_13	USP9X	169.03/0/141.04	5.6477/101.75/0	141.04	5.6477	-4.4173	10338	19468	2.2664	0.011714	0.98829	0.023429	0.33096	FALSE
CTNNBIP1_4	CTNNBIP1	391.24/1047.6/471.46	8.4716/36.276/129.06	471.46	36.276	-3.6639	169180	65075	2.2536	0.01211	0.98789	0.02422	0.34002	FALSE
SVOP_7	SVOP	219.3/95.753/156.27	6.589/0/236.46	156.27	6.589	-4.3732	3817.5	21570	2.2524	0.01215	0.98785	0.0243	0.34002	FALSE
LSM2_9	LSM2	0/13.679/29.797	188.26/0/0	13.679	0	-3.8757	223.46	1888.1	2.2516	0.012174	0.98783	0.024349	0.34002	FALSE
SCAP_11	SCAP	1031.7/563.12/904.51	117.66/168.11/158.51	904.51	158.51	-2.5051	66356	124850	2.2507	0.012203	0.9878	0.024405	0.34042	FALSE
hsa-mir-7973-1_1	hsa-mir-7973-1	0/271.3/221.16	0/138.03/10.394	221.16	10.394	-4.2853	25713	30527	2.2469	0.012323	0.98768	0.024646	0.34339	FALSE
PRMT1_5	PRMT1	228.77/304.36/297.31	16.943/142.45/0	297.31	16.943	-4.0553	2373.7	41038	2.2261	0.013002	0.987	0.026005	0.35985	FALSE
DAP3_13	DAP3	61.928/50.157/96.013	2.8239/0/131.66	61.928	2.8239	-4.0406	650.18	8548	2.2221	0.01314	0.98686	0.026279	0.36323	FALSE
WWP1_13	WWP1	238.24/0/11.257	91.305/0/0	11.257	0	-3.6155	25825	1553.8	2.2034	0.013785	0.98622	0.02757	0.37974	FALSE
SQLE_6	SQLE	308.91/250.78/83.432	60.242/0/13.859	250.78	13.859	-4.0828	15693	34616	2.2024	0.013818	0.98618	0.027636	0.37984	FALSE
MBTPS2_9	MBTPS2	2097.6/180.11/1042.9	271.09/237.12/102.21	1042.9	237.12	-2.1322	928350	143950	2.2002	0.013895	0.9861	0.02779	0.38153	FALSE
MBTPS1_9	MBTPS1	748.24/0/550.26	57.419/84.94/25.985	550.26	57.419	-3.2382	170990	75952	2.1901	0.01426	0.98574	0.028519	0.39022	FALSE
NOP16_7	NOP16	63.386/104.87/139.05	172.26/0/5.197	104.87	5.197	-4.0946	1444.8	14476	2.174	0.014854	0.98515	0.029709	0.40199	FALSE
HYPK_13	HYPK	92.528/0/9.9324	0/0/70.16	9.9324	0	-3.4505	3460.4	1371	2.1725	0.014908	0.98509	0.029815	0.4028	FALSE
CDT1_11	CDT1	0/60.416/27.811	222.14/0.88479/1.7323	27.811	1.7323	-3.3984	918.26	3838.7	2.1682	0.015073	0.98493	0.030146	0.40656	FALSE
PAGE4_7	PAGE4	209.1/257.62/360.22	16.002/11.502/136.85	257.62	16.002	-3.9271	6439.9	35560	2.159	0.015425	0.98458	0.03085	0.41318	FALSE
LSM2_13	LSM2	0/120.83/90.716	4.7064/0/35.513	90.716	4.7064	-4.0065	4568.2	12522	2.1564	0.015526	0.98447	0.031052	0.4151	FALSE
UVRAG_14	UVRAG	42.986/0/9.2703	0/0/90.082	9.2703	0	-3.3604	611.33	1279.6	2.1556	0.015558	0.98444	0.031115	0.4155	FALSE
SLC35B2_3	SLC35B2	1465.9/589.34/924.38	109.19/287.56/194.02	924.38	194.02	-2.2464	202740	127590	2.1522	0.015691	0.98431	0.031381	0.41859	FALSE
PPIAL4A_11	PPIAL4A	0/238.24/70.189	3.7652/453.01/0.86617	70.189	3.7652	-3.9011	16584	9688.2	2.151	0.015739	0.98426	0.031477	0.41941	FALSE
SRCAP_2	SRCAP	436.41/1572/84.094	39.534/149.53/24.253	436.41	39.534	-3.4318	706790	60238	2.1484	0.015839	0.98416	0.031679	0.42019	FALSE
MBTPS1_6	MBTPS1	1239.3/272.44/756.19	102.6/322.06/125.59	756.19	125.59	-2.5804	233700	104380	2.1443	0.016005	0.98399	0.032011	0.42329	FALSE
CHRNA3_6	CHRNA3	169.03/308.92/297.97	20.708/14.157/90.082	297.97	20.708	-3.7837	8373.2	41129	2.1433	0.016045	0.98395	0.03209	0.42388	FALSE
KCNK4_4	KCNK4	18.214/419.49/79.459	61.184/0.88479/4.3308	79.459	4.3308	-3.9158	59686	10968	2.1397	0.016191	0.98381	0.032382	0.42726	FALSE
PACRGL_4	PACRGL	136.97/68.395/190.04	7.5303/0/129.06	136.97	7.5303	-4.0156	3759.5	18906	2.138	0.01626	0.98374	0.032521	0.42863	FALSE
CDK12_5	CDK12	83.057/0/8.6081	0/0/58.899	8.6081	0	-3.2642	2808.4	1188.2	2.1374	0.016282	0.98372	0.032564	0.42874	FALSE
DPAGT1_1	DPAGT1	120.21/0/84.757	4.7064/112.37/0	84.757	4.7064	-3.9096	4220.5	11699	2.1302	0.016577	0.98342	0.033155	0.43511	FALSE
PACRGL_1	PACRGL	360.64/621.26/131.11	286.15/0/29.45	360.64	29.45	-3.5701	60303	49779	2.1264	0.016733	0.98327	0.033467	0.43872	FALSE
ATXN7L3_5	ATXN7L3	2426.1/1477.3/927.03	294.62/1742.1/524.9	1477.3	524.9	-1.4911	601530	203920	2.1215	0.016939	0.98306	0.033879	0.44271	FALSE
RICTOR_10	RICTOR	195.26/0/7.9459	0/0/62.364	7.9459	0	-3.1612	17574	1096.8	2.1178	0.017096	0.9829	0.034192	0.44551	FALSE
CEBPZ_2	CEBPZ	0/204.05/7.9459	0/0/11.26	7.9459	0	-3.1612	19259	1096.8	2.1178	0.017096	0.9829	0.034192	0.44551	FALSE
MBTPS2_5	MBTPS2	605.44/601.88/428.42	155.31/80.516/47.639	601.88	80.516	-2.8867	15051	83077	2.1162	0.017163	0.98284	0.034326	0.44664	FALSE
ATXN7L3_2	ATXN7L3	651.34/327.16/719.11	96.953/98.211/63.23	651.34	96.953	-2.7355	54844	89905	2.1065	0.017578	0.98242	0.035157	0.45599	FALSE
NonTargeting_Human_0355	NonTargeting_Human_0355	694.33/1655.2/223.15	112.95/44.239/496.31	694.33	112.95	-2.6092	572610	95838	2.0978	0.017963	0.98204	0.035926	0.464	FALSE
TAF2_14	TAF2	0/287.26/94.027	5.6477/0/44.175	94.027	5.6477	-3.8374	23090	12979	2.0959	0.018046	0.98195	0.036093	0.46566	FALSE
COMMD10_2	COMMD10	663.73/771.73/320.49	308.74/16.811/103.07	663.73	103.07	-2.6752	64739	91614	2.0949	0.018088	0.98191	0.036176	0.46623	FALSE
hsa-mir-6886_7	hsa-mir-6886	520.93/338.56/531.72	3.7652/234.47/63.23	520.93	63.23	-3.0225	16688	71904	2.0886	0.018373	0.98163	0.036746	0.47209	FALSE
MBTPS1_11	MBTPS1	1303.4/150.47/617.8	40.475/153.07/90.082	617.8	90.082	-2.7642	344230	85274	2.0858	0.0185	0.9815	0.037	0.47485	FALSE
HSPE1_4	HSPE1	98.357/163.01/19.203	18.826/4.4239/6.0632	98.357	6.0632	-3.8142	5222.6	13576	2.0846	0.018552	0.98145	0.037104	0.4749	FALSE
NonTargeting_Human_0481	NonTargeting_Human_0481	966.08/1017.9/428.42	277.68/234.47/221.74	966.08	234.47	-2.0381	145890	133350	2.0844	0.01856	0.98144	0.03712	0.4749	FALSE
SCAP_13	SCAP	1104.5/61.556/856.17	182.61/205.27/86.617	856.17	182.61	-2.2229	346540	118180	2.0797	0.018779	0.98122	0.037557	0.47948	FALSE
SCAP_4	SCAP	489.6/39.897/377.43	212.73/35.391/0	377.43	35.391	-3.3784	63255	52097	2.0789	0.018815	0.98118	0.037631	0.47992	FALSE
NonTargeting_Human_0613	NonTargeting_Human_0613	202.54/118.55/174.15	3.7652/11.502/79.688	174.15	11.502	-3.8083	1948.6	24038	2.0775	0.018876	0.98112	0.037752	0.48096	FALSE
OR5AR1_7	OR5AR1	81.6/13.679/94.689	112.01/0/5.197	81.6	5.197	-3.7365	2392.3	11263	2.0747	0.019008	0.98099	0.038016	0.48282	FALSE
SCAP_6	SCAP	438.6/0/293.34	186.38/0/24.253	293.34	24.253	-3.543	53574	40489	2.0635	0.019535	0.98047	0.039069	0.49159	FALSE
RPL17_7	RPL17	0/356.8/143.69	8.4716/314.98/9.5279	143.69	9.5279	-3.7807	33030	19833	2.0619	0.019607	0.98039	0.039215	0.4924	FALSE
MRPS21_4	MRPS21	108.56/198.35/199.97	14.119/0/53.702	198.35	14.119	-3.7208	4032.4	27378	2.0594	0.019727	0.98027	0.039454	0.4949	FALSE
KDM3B_9	KDM3B	591.6/645.2/336.38	109.19/34.507/86.617	591.6	86.617	-2.7578	34005	81658	2.0586	0.019767	0.98023	0.039534	0.4954	FALSE
RAB5C_10	RAB5C	69.943/420.63/56.946	4.7064/8.8479/0	69.943	4.7064	-3.636	61576	9654.2	2.0579	0.0198	0.9802	0.039601	0.49572	FALSE
TADA2A_12	TADA2A	123.86/91.194/52.973	225.91/0.88479/6.0632	91.194	6.0632	-3.7063	1263.9	12587	2.0539	0.019994	0.98001	0.039988	0.50005	FALSE
C10orf53_3	C10orf53	161.01/0/186.73	118.6/5.3087/11.26	161.01	11.26	-3.7241	13293	22225	2.0465	0.020355	0.97964	0.040711	0.50753	FALSE
DYRK1A_11	DYRK1A	876.47/650.9/80.121	149.66/108.83/6.0632	650.9	108.83	-2.5694	188330	89843	2.0409	0.02063	0.97937	0.041261	0.51178	FALSE
UHRF2_7	UHRF2	246.99/0/50.986	3.7652/0/77.955	50.986	3.7652	-3.4475	20508	7037.7	2.0393	0.020712	0.97929	0.041425	0.51197	FALSE
RALB_3	RALB	107.1/339.7/43.04	7.5303/0/101.34	107.1	7.5303	-3.6636	29102	14783	2.0289	0.021235	0.97876	0.04247	0.52096	FALSE
ELP3_12	ELP3	54.643/98.033/130.45	0/54.857/6.9293	98.033	6.9293	-3.6426	1466.7	13532	2.0269	0.021337	0.97866	0.042674	0.52262	FALSE
TMEM199_9	TMEM199	324.94/318.04/74.824	30.121/291.98/7.7955	318.04	30.121	-3.3578	29600	43899	2.0223	0.02157	0.97843	0.043141	0.52759	FALSE
SCAP_12	SCAP	1058.6/693.07/666.8	31.063/268.98/128.19	693.07	128.19	-2.4256	67155	95665	2.0208	0.021652	0.97835	0.043303	0.52905	FALSE
MBTPS1_12	MBTPS1	273.21/304.36/584.03	4.7064/28.313/45.041	304.36	28.313	-3.3809	39592	42011	2.0191	0.021737	0.97826	0.043475	0.52984	FALSE
GTF2E1_6	GTF2E1	208.37/393.27/231.76	108.25/3.5391/19.056	231.76	19.056	-3.5367	13317	31989	2.0185	0.021771	0.97823	0.043542	0.52984	FALSE
KTI12_14	KTI12	520.93/947.27/341.01	139.31/19.465/72.758	520.93	72.758	-2.823	107070	71904	2.0166	0.021868	0.97813	0.043737	0.53116	FALSE
CAND1_14	CAND1	190.16/984.89/99.324	15.061/0/159.38	190.16	15.061	-3.5732	319930	26247	2.0078	0.022334	0.97767	0.044668	0.54024	FALSE
SEC61B_14	SEC61B	604.71/1882/272.81	99.777/15.926/394.11	604.71	99.777	-2.5875	870820	83469	2.0048	0.022493	0.97751	0.044986	0.54309	FALSE
MSTO1_8	MSTO1	436.41/0/126.47	53.653/0/9.5279	126.47	9.5279	-3.5979	56029	17457	2.0018	0.022655	0.97734	0.04531	0.54645	FALSE
SCAP_3	SCAP	1027.3/1321.2/1190.6	299.33/562.72/391.51	1190.6	391.51	-1.6021	21859	164330	2.0003	0.022735	0.97727	0.04547	0.54784	FALSE
CTR9_2	CTR9	78.686/270.16/47.676	79.068/0/6.0632	78.686	6.0632	-3.4959	18812	10861	1.9951	0.023013	0.97699	0.046027	0.55355	FALSE
GTDC2_11	GTDC2	0/389.85/86.081	6.589/0/52.836	86.081	6.589	-3.5204	49844	11882	1.9951	0.023017	0.97698	0.046035	0.55355	FALSE
MKL1_11	MKL1	248.44/0/210.57	180.73/17.696/8.6617	210.57	17.696	-3.5003	22887	29065	1.9942	0.023067	0.97693	0.046134	0.55398	FALSE
SNX19_3	SNX19	359.91/289.54/221.16	12.237/116.79/27.717	289.54	27.717	-3.3387	4814	39965	1.9937	0.023093	0.97691	0.046185	0.55398	FALSE
hsa-mir-638_15	hsa-mir-638	825.47/882.3/335.05	192.02/308.79/161.97	825.47	192.02	-2.0982	121870	113940	1.9914	0.023221	0.97678	0.046442	0.55626	FALSE
DARS_5	DARS	0/4.5597/15.892	11.295/0/0	4.5597	0	-2.475	74.604	629.37	1.9818	0.023751	0.97625	0.047502	0.56542	FALSE
WARS_7	WARS	468.47/511.82/124.49	93.188/0/64.096	468.47	64.096	-2.8504	60102	64663	1.9781	0.02396	0.97604	0.04792	0.56948	FALSE
hsa-mir-6831_2	hsa-mir-6831	207.64/282.7/45.689	114.84/0/18.19	207.64	18.19	-3.4426	15931	28661	1.9736	0.024216	0.97578	0.048432	0.57446	FALSE
DHX36_11	DHX36	190.16/128.81/49.662	0/93.787/10.394	128.81	10.394	-3.5101	5013.9	17780	1.9722	0.024292	0.97571	0.048583	0.57569	FALSE
C19orf57_11	C19orf57	255.73/0/209.9	8.4716/18.581/235.6	209.9	18.581	-3.4291	23080	28973	1.9703	0.024402	0.9756	0.048803	0.57718	FALSE
SCARB1_3	SCARB1	515.1/450.27/364.19	206.14/37.161/60.632	450.27	60.632	-2.8722	5806.4	62151	1.9694	0.024453	0.97555	0.048907	0.57784	FALSE
LDLR_1	LDLR	304.54/0/605.22	0/31.852/91.814	304.54	31.852	-3.2173	91575	42036	1.9645	0.024734	0.97527	0.049467	0.58052	FALSE
UBA3_2	UBA3	256.46/263.32/148.32	23.532/24.774/181.9	256.46	24.774	-3.3203	5869.9	35399	1.9634	0.024801	0.9752	0.049601	0.58154	FALSE
GZF1_14	GZF1	96.9/10.259/99.324	123.31/7.9631/6.0632	96.9	7.9631	-3.4492	3756.2	13375	1.9618	0.024896	0.9751	0.049791	0.58321	FALSE
SULT6B1_3	SULT6B1	0/241.66/78.135	6.589/0/81.42	78.135	6.589	-3.3823	16423	10785	1.9562	0.025219	0.97478	0.050437	0.59021	FALSE
CEP97_8	CEP97	187.97/450.27/111.91	16.943/0/91.814	187.97	16.943	-3.3967	37293	25946	1.9485	0.025679	0.97432	0.051358	0.59754	FALSE
RBM4B_5	RBM4B	437.87/807.06/214.54	60.242/291.09/4.3308	437.87	60.242	-2.8412	93090	60439	1.9468	0.02578	0.97422	0.05156	0.59881	FALSE
OR5AR1_14	OR5AR1	169.76/264.46/147	3.7652/15.041/158.51	169.76	15.041	-3.4121	4743.5	23432	1.9463	0.025807	0.97419	0.051614	0.59881	FALSE
NHLRC2_4	NHLRC2	249.9/441.15/196.66	265.44/23.004/25.119	249.9	25.119	-3.2639	19705	34494	1.9399	0.026195	0.9738	0.052391	0.60609	FALSE
NUDT17_4	NUDT17	136.97/1.1399/50.324	4.7064/0/164.57	50.324	4.7064	-3.169	4963.4	6946.3	1.9389	0.026255	0.97375	0.052509	0.60689	FALSE
SYS1_3	SYS1	301.63/49.017/248.97	25.415/15.926/26.851	248.97	25.415	-3.2424	21377	34366	1.932	0.026681	0.97332	0.053363	0.61381	FALSE
SLC12A9_9	SLC12A9	265.93/221.14/81.446	21.65/0/110	221.14	21.65	-3.2939	10761	30525	1.9316	0.026705	0.97329	0.05341	0.61381	FALSE
LDLR_8	LDLR	482.31/680.53/746.92	143.08/798.96/93.546	680.53	143.08	-2.242	21849	93934	1.9283	0.026909	0.97309	0.053819	0.61793	FALSE
GIGYF2_4	GIGYF2	116.57/0/175.47	10.354/0/155.91	116.57	10.354	-3.3722	8529.1	16090	1.9273	0.026974	0.97303	0.053947	0.61882	FALSE
TMEM67_7	TMEM67	34.971/454.83/109.26	5.6477/9.7327/80.554	109.26	9.7327	-3.3608	62469	15081	1.9254	0.027089	0.97291	0.054179	0.6209	FALSE
EXOC4_6	EXOC4	947.14/474.21/166.86	72.479/78.746/17.323	474.21	72.479	-2.6931	159060	65455	1.9245	0.027144	0.97286	0.054287	0.62113	FALSE
NAA10_1	NAA10	144.26/0/151.63	13.178/0/148.11	144.26	13.178	-3.3569	10432	19912	1.9214	0.02734	0.97266	0.054679	0.62429	FALSE
ZBTB8OS_10	ZBTB8OS	257.91/0/356.9	288.98/27.428/11.26	257.91	27.428	-3.1871	38159	35600	1.9193	0.027471	0.97253	0.054941	0.62611	FALSE
INPP5J_2	INPP5J	564.64/522.08/166.86	87.54/76.976/123	522.08	87.54	-2.5626	63996	72063	1.9178	0.027568	0.97243	0.055137	0.62769	FALSE
UBE2L3_1	UBE2L3	0/3.4198/17.878	0/0/89.215	3.4198	0	-2.144	110.37	472.03	1.9109	0.028006	0.97199	0.056011	0.63415	FALSE
GFER_9	GFER	418.2/33.058/148.32	14.119/0/134.26	148.32	14.119	-3.304	43059	20473	1.9041	0.028446	0.97155	0.056893	0.63998	FALSE
C19orf57_12	C19orf57	370.84/95.753/103.96	9.4129/9.7327/164.57	103.96	9.7327	-3.2898	35647	14350	1.9031	0.028515	0.97148	0.05703	0.64094	FALSE
FAM134C_9	FAM134C	161.01/386.43/261.55	233.44/29.198/12.993	261.55	29.198	-3.1201	12852	36102	1.8989	0.028789	0.97121	0.057578	0.64531	FALSE
FURIN_3	FURIN	474.3/805.92/254.93	76.244/0/251.19	474.3	76.244	-2.6213	79049	65468	1.8969	0.028919	0.97108	0.057839	0.64659	FALSE
WWP1_1	WWP1	419.66/489.03/6.6216	0/97.327/61.498	419.66	61.498	-2.7508	87705	57925	1.8969	0.028923	0.97108	0.057846	0.64659	FALSE
NELFB_11	NELFB	128.23/329.44/32.446	12.237/11.502/76.223	128.23	12.237	-3.2873	24830	17699	1.8968	0.028926	0.97107	0.057852	0.64659	FALSE
NFRKB_3	NFRKB	1172.3/2024.5/403.26	625.02/382.23/422.69	1172.3	422.69	-1.4695	658840	161810	1.8886	0.02947	0.97053	0.058939	0.65694	FALSE
C9orf41_13	C9orf41	124.59/202.91/176.13	17.884/0.88479/175.83	176.13	17.884	-3.2296	1687	24312	1.887	0.029579	0.97042	0.059158	0.65818	FALSE
TRIAP1_2	TRIAP1	0/409.23/329.09	52.712/0/42.442	329.09	42.442	-2.9257	57362	45425	1.8827	0.029867	0.97013	0.059734	0.66338	FALSE
SCAP_2	SCAP	894.68/596.18/463.51	239.09/119.45/38.111	596.18	119.45	-2.3098	53353	82291	1.8809	0.029991	0.97001	0.059982	0.66487	FALSE
EPB41_5	EPB41	764.27/941.58/216.53	192.02/175.19/263.32	764.27	192.02	-1.9872	165730	105490	1.8806	0.030016	0.96998	0.060032	0.66487	FALSE
AP2M1_5	AP2M1	338.78/254.2/198.65	29.18/14.157/258.12	254.2	29.18	-3.08	5120.2	35088	1.8798	0.030067	0.96993	0.060133	0.66539	FALSE
SLC26A4_10	SLC26A4	169.76/59.276/103.3	10.354/0/185.36	103.3	10.354	-3.1994	3177.4	14258	1.872	0.0306	0.9694	0.0612	0.67475	FALSE
HYOU1_8	HYOU1	69.214/0/62.243	6.589/0/66.695	62.243	6.589	-3.0589	1961.4	8591.4	1.8674	0.030924	0.96908	0.061849	0.67967	FALSE
SCAP_14	SCAP	768.64/724.99/437.03	178.84/133.6/369.85	724.99	178.84	-2.0132	42414	100070	1.8589	0.03152	0.96848	0.06304	0.68943	FALSE
SETD1A_6	SETD1A	214.93/263.32/146.34	24.474/0/93.546	214.93	24.474	-3.0835	3523.3	29667	1.8558	0.031738	0.96826	0.063476	0.69358	FALSE
GMPPB_2	GMPPB	306/281.56/230.43	58.36/0/35.513	281.56	35.513	-2.9521	1605.7	38864	1.8546	0.031824	0.96818	0.063649	0.6939	FALSE
UBA2_12	UBA2	409.46/395.55/85.419	60.242/453.01/16.457	395.55	60.242	-2.6949	48188	54598	1.8544	0.031838	0.96816	0.063676	0.6939	FALSE
PRMT1_7	PRMT1	371.57/405.81/262.88	54.595/0/233	371.57	54.595	-2.7445	6493.3	51288	1.8523	0.031995	0.96801	0.06399	0.69598	FALSE
TRAPPC1_15	TRAPPC1	814.54/92.334/550.92	108.25/0/112.6	550.92	108.25	-2.3368	139900	76043	1.851	0.032082	0.96792	0.064165	0.69673	FALSE
EXOC3_3	EXOC3	577.03/566.54/366.84	76.244/285.79/114.33	566.54	114.33	-2.2989	19996	78200	1.8489	0.032234	0.96777	0.064467	0.69784	FALSE
INTS1_11	INTS1	0.72857/321.46/88.73	9.4129/0/77.089	88.73	9.4129	-3.1072	30953	12247	1.8487	0.032248	0.96775	0.064495	0.69784	FALSE
ELP3_4	ELP3	554.44/466.23/572.11	109.19/170.76/110	554.44	110	-2.323	4046.9	76530	1.8483	0.032278	0.96772	0.064557	0.69789	FALSE
DAZ1_8	DAZ1	122.4/454.83/14.568	1.8826/47.778/12.993	122.4	12.993	-3.1406	61068	16895	1.8466	0.032405	0.96759	0.064811	0.69978	FALSE
MSTO1_6	MSTO1	312.56/305.5/63.567	128.02/0/40.71	305.5	40.71	-2.8774	29290	42168	1.8463	0.032423	0.96758	0.064847	0.69978	FALSE
SULT1A2_5	SULT1A2	675.38/631.52/351.61	141.19/59.281/343.87	631.52	141.19	-2.1532	40137	87168	1.8426	0.032694	0.96731	0.065387	0.70482	FALSE
MSTO1_5	MSTO1	256.46/239.38/73.5	60.242/29.198/11.26	239.38	29.198	-2.9928	13904	33042	1.8392	0.032942	0.96706	0.065884	0.70732	FALSE
GPN3_7	GPN3	104.91/259.9/79.459	11.295/0/122.13	104.91	11.295	-3.1067	12335	14481	1.839	0.032961	0.96704	0.065922	0.70732	FALSE
HNRNPU_4	HNRNPU	130.41/38.757/62.905	3.7652/7.0783/110.87	62.905	7.0783	-2.9838	2570.3	8682.8	1.8388	0.032971	0.96703	0.065943	0.70732	FALSE
STARD4_5	STARD4	205.46/87.774/15.892	3.7652/78.746/9.5279	87.774	9.5279	-3.0759	9508.1	12115	1.8385	0.032997	0.967	0.065995	0.70732	FALSE
MRPL42_8	MRPL42	718.37/677.11/181.43	231.56/152.18/161.97	677.11	161.97	-2.0569	123700	93462	1.8378	0.033049	0.96695	0.066097	0.70732	FALSE
METAP1_10	METAP1	131.87/0/119.85	46.123/0/12.993	119.85	12.993	-3.1105	7254.4	16543	1.8364	0.033152	0.96685	0.066305	0.70819	FALSE
hsa-mir-6831_5	hsa-mir-6831	416.01/514.1/78.135	67.773/14.157/94.412	416.01	67.773	-2.6002	61892	57422	1.8361	0.033171	0.96683	0.066342	0.70819	FALSE
TAF1_3	TAF1	269.57/264.46/20.527	24.474/515.83/33.781	264.46	33.781	-2.9322	29765	36504	1.8349	0.033258	0.96674	0.066515	0.70901	FALSE
NHLRC2_7	NHLRC2	42.257/0/80.121	84.716/0/5.197	42.257	5.197	-2.8033	1609.7	5832.7	1.8329	0.03341	0.96659	0.066819	0.70924	FALSE
TMEM183A_3	TMEM183A	196.71/0/111.91	12.237/0/67.561	111.91	12.237	-3.0925	9857.6	15446	1.8316	0.033502	0.9665	0.067005	0.70989	FALSE
BAGE2_15	BAGE2	133.33/494.73/40.392	50.83/14.157/14.725	133.33	14.725	-3.0946	69623	18403	1.8302	0.033609	0.96639	0.067218	0.71153	FALSE
SLC35B2_12	SLC35B2	323.49/337.42/164.22	114.84/0/45.907	323.49	45.907	-2.7903	12780	44651	1.8289	0.033707	0.96629	0.067413	0.71298	FALSE
PIK3R4_8	PIK3R4	126.77/288.4/65.554	14.119/0/66.695	126.77	14.119	-3.0791	14936	17498	1.8248	0.034019	0.96598	0.068038	0.71648	FALSE
ATXN7L3_3	ATXN7L3	1771.9/982.61/606.54	328.51/161.03/433.08	982.61	328.51	-1.5778	382190	135630	1.8227	0.034174	0.96583	0.068349	0.71879	FALSE
DYRK1A_10	DYRK1A	1514/688.51/926.36	114.84/975.04/295.36	926.36	295.36	-1.6458	200930	127870	1.8225	0.034187	0.96581	0.068375	0.71879	FALSE
RBM3_12	RBM3	483.04/353.38/123.82	115.78/11.502/53.702	353.38	53.702	-2.6956	34754	48776	1.8184	0.034505	0.96549	0.06901	0.72422	FALSE
LSM2_12	LSM2	24.043/91.194/148.99	6.589/310.56/10.394	91.194	10.394	-3.0164	3924.6	12587	1.8146	0.034789	0.96521	0.069578	0.72768	FALSE
VHL_14	VHL	722.01/690.79/92.703	325.69/174.3/22.52	690.79	174.3	-1.9805	179340	95350	1.8119	0.035003	0.965	0.070005	0.73152	FALSE
KDM6A_2	KDM6A	885.21/686.23/214.54	192.96/172.53/161.11	686.23	172.53	-1.9856	131040	94721	1.8104	0.035116	0.96488	0.070233	0.73213	FALSE
EXOC3_12	EXOC3	1648.8/69.535/1021.7	673.02/356.57/219.14	1021.7	356.57	-1.5161	649910	141030	1.8103	0.035122	0.96488	0.070243	0.73213	FALSE
EXOC3_14	EXOC3	789.77/818.46/382.07	259.8/64.589/224.34	789.77	224.34	-1.8112	83522	109010	1.8078	0.035315	0.96468	0.070631	0.73491	FALSE
UVRAG_5	UVRAG	348.26/0/137.07	2.8239/15.926/162.84	137.07	15.926	-3.028	31694	18919	1.8071	0.035375	0.96463	0.07075	0.73497	FALSE
PTPMT1_10	PTPMT1	270.3/923.34/814.46	238.15/699.87/187.09	814.46	238.15	-1.7697	153980	112420	1.8052	0.035522	0.96448	0.071045	0.7367	FALSE
DDX52_7	DDX52	167.57/351.1/293.34	120.48/14.157/41.576	293.34	41.576	-2.7894	9576.6	40489	1.8047	0.035563	0.96444	0.071127	0.73693	FALSE
hsa-mir-532_2	hsa-mir-532	566.1/1892.3/1184.6	464.06/383.11/829.79	1184.6	464.06	-1.3501	441670	163510	1.8024	0.035744	0.96426	0.071487	0.7375	FALSE
HSD17B10_15	HSD17B10	495.43/515.24/52.311	186.38/86.709/97.011	495.43	97.011	-2.3406	98373	68384	1.802	0.035772	0.96423	0.071544	0.7375	FALSE
RBM3_9	RBM3	708.9/652.04/437.03	276.74/98.211/159.38	652.04	159.38	-2.0257	24731	90000	1.7999	0.035936	0.96406	0.071871	0.73962	FALSE
WWP1_15	WWP1	64.843/119.69/50.986	40.475/7.9631/6.9293	64.843	7.9631	-2.877	1600.2	8950.2	1.7962	0.036231	0.96377	0.072461	0.74318	FALSE
CHD7_14	CHD7	1006.9/1468.2/680.7	352.98/692.79/323.95	1006.9	352.98	-1.5096	159610	138980	1.7943	0.036381	0.96362	0.072762	0.74525	FALSE
DENND4A_13	DENND4A	437.87/221.14/380.74	279.56/11.502/63.23	380.74	63.23	-2.5713	14368	52554	1.7939	0.036411	0.96359	0.072822	0.74525	FALSE
KCNU1_1	KCNU1	200.36/344.26/80.121	25.415/0/97.877	200.36	25.415	-2.9303	17582	27655	1.7938	0.036423	0.96358	0.072846	0.74525	FALSE
NARF_13	NARF	0/77.515/119.19	9.4129/0/51.104	77.515	9.4129	-2.9146	3872.6	10699	1.791	0.036644	0.96336	0.073289	0.74771	FALSE
PIK3C3_8	PIK3C3	389.78/155.03/320.49	34.828/48.663/183.63	320.49	48.663	-2.6945	16089	44237	1.7908	0.036665	0.96333	0.073331	0.74771	FALSE
MOCS3_4	MOCS3	118.03/591.62/22.513	14.119/0/120.4	118.03	14.119	-2.9768	116710	16291	1.7895	0.036767	0.96323	0.073533	0.74914	FALSE
ATP5O_2	ATP5O	131.14/0/102.63	12.237/12.387/146.38	102.63	12.387	-2.9526	5673.3	14167	1.7853	0.037104	0.9629	0.074207	0.75374	FALSE
CHD7_4	CHD7	492.51/820.74/233.08	142.13/64.589/98.743	492.51	98.743	-2.3068	87520	67982	1.7849	0.037136	0.96286	0.074271	0.75374	FALSE
RNMT_1	RNMT	230.96/392.13/205.93	31.063/22.12/45.041	230.96	31.063	-2.8549	13302	31879	1.7844	0.037178	0.96282	0.074355	0.75374	FALSE
STT3A_15	STT3A	416.74/1.1399/68.865	103.54/0/8.6617	68.865	8.6617	-2.8542	62803	9505.4	1.781	0.037453	0.96255	0.074906	0.75677	FALSE
POLR2C_15	POLR2C	834.94/801.36/264.86	238.15/476.02/178.43	801.36	238.15	-1.7464	144480	110610	1.7805	0.037496	0.9625	0.074993	0.75677	FALSE
SEC61B_4	SEC61B	734.4/722.71/290.69	112.95/231.81/197.49	722.71	197.49	-1.8664	93390	99756	1.7803	0.037515	0.96249	0.07503	0.75677	FALSE
EIF2S2_3	EIF2S2	321.3/134.51/451.59	49.888/32.737/308.36	321.3	49.888	-2.663	25933	44349	1.7795	0.037579	0.96242	0.075158	0.75685	FALSE
PFDN6_12	PFDN6	174.86/0/40.392	5.6477/28.313/0	40.392	5.6477	-2.6384	9856.2	5575.3	1.7784	0.037667	0.96233	0.075335	0.75738	FALSE
DYRK1A_9	DYRK1A	916.54/406.95/233.74	228.73/18.581/72.758	406.95	72.758	-2.4675	144840	56172	1.7755	0.037905	0.9621	0.07581	0.75951	FALSE
HYPK_9	HYPK	0/367.05/1.9865	131.78/0/0	1.9865	0	-1.5784	66639	274.19	1.7753	0.037927	0.96207	0.075853	0.75951	FALSE
DPAGT1_15	DPAGT1	652.07/281.56/355.58	179.79/0/58.899	355.58	58.899	-2.5736	46693	49081	1.7734	0.03808	0.96192	0.07616	0.75951	FALSE
GDI2_13	GDI2	115.84/294.1/157.59	70.597/0/19.922	157.59	19.922	-2.9223	10188	21753	1.7734	0.038084	0.96192	0.076169	0.75951	FALSE
SYTL3_2	SYTL3	168.3/320.32/29.135	37.652/13.272/21.654	168.3	21.654	-2.9017	21238	23230	1.7694	0.038416	0.96158	0.076832	0.76425	FALSE
MRPL28_3	MRPL28	541.33/656.59/107.93	9.4129/281.36/119.53	541.33	119.53	-2.1698	100560	74719	1.7685	0.038492	0.96151	0.076985	0.76487	FALSE
CHD7_1	CHD7	346.07/314.62/256.92	81.892/0/49.372	314.62	49.372	-2.6475	2159.3	43427	1.7682	0.03851	0.96149	0.077019	0.76487	FALSE
LDLR_9	LDLR	423.3/0/476.09	9.4129/491.94/78.821	423.3	78.821	-2.4102	90985	58428	1.7666	0.038651	0.96135	0.077301	0.76642	FALSE
SSX2_11	SSX2	491.78/569.96/127.13	32.004/208.81/102.21	491.78	102.21	-2.2554	69540	67881	1.762	0.039033	0.96097	0.078066	0.77164	FALSE
SCYL1_3	SCYL1	47.357/0/38.405	5.6477/0/110	38.405	5.6477	-2.5675	777.55	5301.1	1.7605	0.039165	0.96084	0.07833	0.77285	FALSE
ALG2_10	ALG2	785.4/247.36/613.16	151.55/0/213.08	613.16	151.55	-2.0094	81737	84635	1.7571	0.039448	0.96055	0.078895	0.77717	FALSE
MKL1_10	MKL1	330.77/340.84/144.35	54.595/0/239.93	330.77	54.595	-2.5772	17427	45656	1.7542	0.039695	0.96031	0.079389	0.78141	FALSE
GTF2H3_3	GTF2H3	61.928/0/50.324	85.657/7.0783/0	50.324	7.0783	-2.6675	1333.6	6946.3	1.753	0.039802	0.9602	0.079604	0.78289	FALSE
MBTPS2_13	MBTPS2	1961.3/242.8/723.08	205.2/84.94/376.78	723.08	205.2	-1.8121	881940	99807	1.751	0.039975	0.96002	0.079951	0.78465	FALSE
ANKHD1-EIF4EBP3_11	ANKHD1-EIF4EBP3	353.36/277/58.27	103.54/0/42.442	277	42.442	-2.6779	26837	38234	1.7508	0.039988	0.96001	0.079976	0.78465	FALSE
GIGYF2_7	GIGYF2	565.37/616.7/381.4	245.68/132.72/116.93	565.37	132.72	-2.0826	18239	78038	1.7497	0.040088	0.95991	0.080176	0.78599	FALSE
SRP14_13	SRP14	136.97/248.5/236.39	8.4716/34.507/188.82	236.39	34.507	-2.7411	5015.5	32629	1.7462	0.040387	0.95961	0.080774	0.78942	FALSE
COX5B_1	COX5B	422.57/458.25/111.24	160.02/0/82.286	422.57	82.286	-2.3465	49099	58327	1.7395	0.040977	0.95902	0.081955	0.79829	FALSE
PFN1_15	PFN1	442.97/752.35/66.216	80.951/133.6/89.215	442.97	89.215	-2.299	118830	61143	1.7373	0.041163	0.95884	0.082325	0.7996	FALSE
NonTargeting_Human_0932	NonTargeting_Human_0932	467.74/518.66/13.905	58.36/149.53/97.877	467.74	97.877	-2.2451	104280	64562	1.736	0.041279	0.95872	0.082558	0.8009	FALSE
HAVCR1_6	HAVCR1	358.46/84.354/343.66	60.242/0/232.13	343.66	60.242	-2.4926	33730	47436	1.7316	0.041671	0.95833	0.083342	0.80602	FALSE
STK11_12	STK11	184.33/0/66.878	9.4129/0/40.71	66.878	9.4129	-2.7046	9133.6	9231.2	1.7293	0.041879	0.95812	0.083757	0.80854	FALSE
CWC22_15	CWC22	164.66/137.93/45.689	18.826/0/63.23	137.93	18.826	-2.8089	4611.4	19039	1.7288	0.041926	0.95807	0.083853	0.80854	FALSE
FAM110D_11	FAM110D	319.84/0/150.97	44.241/0/20.788	150.97	20.788	-2.8022	25655	20839	1.7284	0.041957	0.95804	0.083914	0.80854	FALSE
GTF2E1_12	GTF2E1	272.49/278.14/176.8	208.97/33.622/43.308	272.49	43.308	-2.6258	4594.1	37611	1.7278	0.042014	0.95799	0.084029	0.80854	FALSE
RNMT_15	RNMT	525.3/323.74/68.203	55.536/35.391/134.26	323.74	55.536	-2.522	52963	44686	1.727	0.042082	0.95792	0.084164	0.80883	FALSE
MID1_3	MID1	308.91/282.7/413.19	33.886/220.31/51.97	308.91	51.97	-2.5486	5780.2	42639	1.7256	0.042206	0.95779	0.084411	0.81047	FALSE
NonTargeting_Human_0438	NonTargeting_Human_0438	666.64/837.84/413.85	183.55/167.22/360.33	666.64	183.55	-1.8551	46606	92017	1.7253	0.042234	0.95777	0.084467	0.81047	FALSE
DET1_13	DET1	295.8/372.75/127.8	48.947/11.502/123.86	295.8	48.947	-2.571	17073	40829	1.7242	0.042339	0.95766	0.084678	0.81061	FALSE
MRPS31_11	MRPS31	225.13/356.8/27.149	192.96/30.968/33.781	225.13	33.781	-2.7008	28266	31074	1.7242	0.04234	0.95766	0.08468	0.81061	FALSE
UXT_3	UXT	324.21/0/166.86	23.532/0/145.52	166.86	23.532	-2.7745	26301	23032	1.7228	0.042462	0.95754	0.084924	0.81223	FALSE
FAM134C_14	FAM134C	392.7/434.31/328.43	75.303/0/207.88	392.7	75.303	-2.3673	2930.9	54204	1.7222	0.042517	0.95748	0.085035	0.81223	FALSE
CLK2_11	CLK2	268.11/80.934/210.57	70.597/28.313/31.182	210.57	31.182	-2.7168	10058	29065	1.7216	0.042572	0.95743	0.085144	0.81235	FALSE
TMOD2_6	TMOD2	80.143/0/86.081	55.536/0/11.26	80.143	11.26	-2.7265	3229.1	11062	1.7195	0.042761	0.95724	0.085521	0.81355	FALSE
WDR7_6	WDR7	368.66/587.06/252.28	68.714/160.15/9.5279	368.66	68.714	-2.4067	30621	50886	1.7179	0.042907	0.95709	0.085814	0.81537	FALSE
EXOC4_5	EXOC4	163.2/0/111.91	41.417/0/15.591	111.91	15.591	-2.7666	7576.9	15446	1.715	0.043172	0.95683	0.086343	0.81868	FALSE
GAGE12B_11	GAGE12B	440.06/275.86/223.15	24.474/45.124/155.91	275.86	45.124	-2.5856	14869	38077	1.7148	0.043188	0.95681	0.086376	0.81868	FALSE
SNX1_3	SNX1	719.83/584.78/184.74	270.15/111.48/148.11	584.78	148.11	-1.9739	89134	80717	1.7144	0.043225	0.95678	0.08645	0.81868	FALSE
ZBTB8OS_3	ZBTB8OS	330.04/395.55/418.49	77.186/46.894/169.77	395.55	77.186	-2.3425	2408.8	54598	1.7144	0.043232	0.95677	0.086463	0.81868	FALSE
MED12_13	MED12	346.8/1345.1/221.82	63.066/105.29/53.702	346.8	63.066	-2.4406	506120	47869	1.7134	0.043317	0.95668	0.086634	0.81924	FALSE
MED26_9	MED26	328.58/223.42/317.84	77.186/36.276/55.435	317.84	55.435	-2.4982	4514.6	43871	1.7129	0.043365	0.95663	0.08673	0.81924	FALSE
LDLR_6	LDLR	472.84/371.61/578.73	11.295/103.52/169.77	472.84	103.52	-2.1806	10729	65266	1.7121	0.043438	0.95656	0.086875	0.81941	FALSE
DYRK1A_13	DYRK1A	946.41/538.04/498.61	128.96/848.51/79.688	538.04	128.96	-2.0524	84160	74266	1.711	0.043541	0.95646	0.087082	0.82073	FALSE
FZR1_3	FZR1	775.2/172.13/734.34	211.79/538.84/221.74	734.34	221.74	-1.723	158870	101360	1.7102	0.043612	0.95639	0.087224	0.82113	FALSE
KIAA1432_8	KIAA1432	651.34/872.04/310.55	179.79/229.16/111.74	651.34	179.79	-1.8513	82422	89905	1.71	0.04363	0.95637	0.08726	0.82113	FALSE
NIPSNAP1_5	NIPSNAP1	522.38/577.94/137.73	263.56/16.811/123	522.38	123	-2.0776	75523	72105	1.709	0.043728	0.95627	0.087457	0.82172	FALSE
CTDP1_14	CTDP1	96.171/0/85.419	12.237/0/174.97	85.419	12.237	-2.7068	3706	11790	1.7072	0.043896	0.9561	0.087792	0.82297	FALSE
MBTPS2_2	MBTPS2	505.63/0/256.92	112.01/0/41.576	256.92	41.576	-2.5988	63932	35462	1.7064	0.043966	0.95603	0.087932	0.82365	FALSE
TAF1_12	TAF1	618.56/709.03/319.82	164.73/165.46/385.45	618.56	165.46	-1.8961	48713	85379	1.7048	0.044113	0.95589	0.088226	0.82519	FALSE
HNF4A_15	HNF4A	238.24/205.19/56.946	30.121/281.36/31.182	205.19	31.182	-2.6796	11534	28322	1.7048	0.044116	0.95588	0.088233	0.82519	FALSE
COPS2_14	COPS2	177.77/481.05/86.743	26.356/175.19/25.985	177.77	26.356	-2.7082	50131	24538	1.7024	0.044338	0.95566	0.088676	0.82712	FALSE
MDH1_7	MDH1	51.728/0/25.162	4.7064/0/50.238	25.162	4.7064	-2.1968	669.45	3473.1	1.7015	0.044423	0.95558	0.088845	0.82712	FALSE
ALG2_13	ALG2	578.48/313.48/323.8	21.65/82.285/58.899	323.8	58.899	-2.4389	32486	44694	1.6941	0.045127	0.95487	0.090253	0.83495	FALSE
CDC14A_6	CDC14A	227.31/303.22/168.85	94.129/36.276/21.654	227.31	36.276	-2.6147	4589.8	31376	1.6931	0.04522	0.95478	0.090439	0.83495	FALSE
LDLR_13	LDLR	772.28/1.1399/434.38	64.008/92.903/142.05	434.38	92.903	-2.213	150940	59957	1.6926	0.045261	0.95474	0.090523	0.83509	FALSE
CCT8_3	CCT8	308.19/221.14/125.15	25.415/324.72/35.513	221.14	35.513	-2.605	8395.7	30525	1.6857	0.045927	0.95407	0.091854	0.84499	FALSE
GTF3C4_13	GTF3C4	350.44/307.78/92.703	55.536/134.49/32.048	307.78	55.536	-2.4493	24039	42483	1.6856	0.045936	0.95406	0.091872	0.84499	FALSE
ATXN7L3_4	ATXN7L3	212.01/237.1/62.243	33.886/99.981/14.725	212.01	33.886	-2.6102	11530	29264	1.6824	0.046245	0.95376	0.09249	0.8478	FALSE
POLRMT_1	POLRMT	52.457/0/107.27	8.4716/0/53.702	52.457	8.4716	-2.4967	2878.1	7240.6	1.6824	0.046247	0.95375	0.092495	0.8478	FALSE
ARPC3_6	ARPC3	182.14/52.436/20.527	8.4716/0/91.814	52.436	8.4716	-2.4961	8920.9	7237.8	1.6822	0.046263	0.95374	0.092525	0.8478	FALSE
ARL8A_7	ARL8A	451.71/389.85/170.18	18.826/99.981/79.688	389.85	79.688	-2.2762	26043	53811	1.6815	0.046329	0.95367	0.092658	0.84838	FALSE
GFER_10	GFER	271.76/339.7/270.82	47.064/215/10.394	271.76	47.064	-2.5046	2308.4	37511	1.6804	0.046437	0.95356	0.092875	0.84969	FALSE
EXOC1_1	EXOC1	353.36/501.57/262.88	68.714/37.161/102.21	353.36	68.714	-2.3457	15076	48774	1.6801	0.04647	0.95353	0.092941	0.84969	FALSE
UBE2I_12	UBE2I	160.29/275.86/156.93	24.474/30.083/14.725	160.29	24.474	-2.6625	6684.5	22124	1.6793	0.046542	0.95346	0.093085	0.85037	FALSE
NonTargeting_Human_0719	NonTargeting_Human_0719	1011.3/997.43/461.53	454.64/298.17/387.18	997.43	387.18	-1.3629	143690	137680	1.6788	0.046593	0.95341	0.093185	0.85065	FALSE
COPS6_8	COPS6	185.79/265.6/84.094	29.18/0/89.215	185.79	29.18	-2.6297	8355.8	25644	1.6765	0.046818	0.95318	0.093636	0.85349	FALSE
ATXN7L3_12	ATXN7L3	602.53/934.74/779.36	357.69/256.59/218.27	779.36	256.59	-1.5991	27706	107580	1.6732	0.047147	0.95285	0.094294	0.85821	FALSE
UBE2Q1_13	UBE2Q1	134.06/0/1.3243	0/95.557/0.86617	1.3243	0.86617	-0.31673	8809.8	182.8	1.6716	0.047305	0.95269	0.094611	0.86045	FALSE
NonTargeting_Human_0655	NonTargeting_Human_0655	620.74/753.49/210.57	429.23/121.22/174.1	620.74	174.1	-1.8281	92932	85681	1.6711	0.047349	0.95265	0.094699	0.86061	FALSE
PPP1CB_5	PPP1CB	346.07/975.77/112.57	67.773/199.96/57.167	346.07	67.773	-2.3353	225520	47768	1.6698	0.047478	0.95252	0.094956	0.8623	FALSE
ALG2_2	ALG2	472.84/11.399/325.78	62.125/11.502/89.215	325.78	62.125	-2.372	60232	44968	1.6686	0.047602	0.9524	0.095204	0.86384	FALSE
DNASE2_12	DNASE2	547.16/769.45/497.94	141.19/64.589/249.46	547.16	141.19	-1.9467	25918	75524	1.6678	0.047676	0.95232	0.095352	0.86384	FALSE
NonTargeting_Human_0538	NonTargeting_Human_0538	40.071/0/94.689	0/7.0783/12.126	40.071	7.0783	-2.346	2294.4	5531	1.6673	0.047724	0.95228	0.095447	0.86384	FALSE
ZBTB44_14	ZBTB44	202.54/785.41/235.07	150.61/0/39.844	235.07	39.844	-2.531	151970	32446	1.6658	0.047873	0.95213	0.095746	0.86412	FALSE
DGKK_11	DGKK	94.714/383.01/158.26	0/24.774/260.72	158.26	24.774	-2.6274	27277	21844	1.6656	0.047895	0.95211	0.09579	0.86412	FALSE
EXT1_11	EXT1	21.129/221.14/139.72	21.65/304.37/8.6617	139.72	21.65	-2.6352	10347	19285	1.6649	0.047962	0.95204	0.095924	0.86412	FALSE
CCDC169-SOHLH2_1	CCDC169-SOHLH2	402.17/292.96/274.8	128.96/30.968/53.702	292.96	53.702	-2.4259	6128.4	40437	1.6649	0.047966	0.95203	0.095931	0.86412	FALSE
NonTargeting_Human_0315	NonTargeting_Human_0315	230.96/990.59/554.89	453.7/0/145.52	554.89	145.52	-1.9237	147380	76592	1.6631	0.048143	0.95186	0.096287	0.86665	FALSE
NonTargeting_Human_0722	NonTargeting_Human_0722	375.94/259.9/298.63	55.536/18.581/379.38	298.63	55.536	-2.406	3738.3	41221	1.6612	0.048339	0.95166	0.096679	0.8689	FALSE
[truncated: 11,848 more rows]

## Sheet: HepG2_LP-depl_gRNA
sgrna	Gene	control_count	treatment_count	control_mean	treat_mean	LFC	control_var	adj_var	score	p.low	p.high	p.twosided	FDR	high_in_treatment
[truncated: 12,205 more rows]
